# Supplementary material for: Ellagic Acid Triggers the Necrosis of Differentiated Human Enterocytes Exposed to 3-Nitro-Tyrosine: An MS-Based Proteomic Study
Source: Antioxidants (Basel). 2022 Dec 17;11(12):2485. doi: 10.3390/antiox11122485 (PMC9774974; doi:10.3390/antiox11122485)
Supplement: Supplementary file 1 [file antioxidants-11-02485-s001.zip]

Archive with 11 entries (11 files):
- manuscript.v9_SupplFigures.pdf
- Table S1.xlsx
- Table S10.xls
- Table S2.xls
- Table S3.xls
- Table S4.xls
- Table S5.xls
- Table S6.xls
- Table S7.xls
- Table S8.xls
- Table S9.xls
