# Supplementary material for: Ellagic Acid Triggers the Necrosis of Differentiated Human Enterocytes Exposed to 3-Nitro-Tyrosine: An MS-Based Proteomic Study
Source: Antioxidants (Basel). 2022 Dec 17;11(12):2485. doi: 10.3390/antiox11122485 (PMC9774974; doi:10.3390/antiox11122485)
Supplement: Supplementary file 1 [file antioxidants-11-02485-s001.zip › Table S1.xlsx]

## Sheet: Hoja1
LFQ intensity 3NT_1	LFQ intensity 3NT_2	LFQ intensity 3NT_3	LFQ intensity 3NT_4	LFQ intensity 3NT_5	LFQ intensity C_1	LFQ intensity C_2	LFQ intensity C_3	LFQ intensity C_4	LFQ intensity C_5	LFQ intensity EA_1	LFQ intensity EA_2	LFQ intensity EA_3	LFQ intensity EA_4	LFQ intensity EA_5	C: Student's T-test Significant 3NT_Control	C: Student's T-test significant	N: Peptides	N: Razor + unique peptides	N: Unique peptides	N: Sequence coverage [%]	N: Unique + razor sequence coverage [%]	N: Unique sequence coverage [%]	N: Mol. weight [kDa]	N: Q-value	N: Score	N: Intensity	N: MS/MS count	N: Mean	N: Mean 3NT	N: Mean Control	N: Mean 3NT+EA	N: Valid values	N: Valid values 3NT	N: Valid values Control	N: Valid values 3NT+EA	N: Student's T-test p-value 3NT_Control	N: Student's T-test Difference 3NT_Control	N: Student's T-test Test statistic 3NT_Control	T: Protein IDs	T: Majority protein IDs	T: Protein names	T: Gene names	T: id	T: Fasta headers
NaN	26.2571	26.0479	26.3537	26.6939	NaN	NaN	NaN	NaN	NaN	NaN	NaN	NaN	NaN	NaN			3	3	3	21.7	21.7	21.7	19.687	0	11.854	345560000	10	26.3381	26.3381	NaN	NaN	4	4	0	0	1	NaN	0	A0A0A0MRR7;P09234	A0A0A0MRR7;P09234	U1 small nuclear ribonucleoprotein C	SNRPC	139	tr|A0A0A0MRR7|A0A0A0MRR7_HUMAN U1 small nuclear ribonucleoprotein C OS=Homo sapiens OX=9606 GN=SNRPC PE=1 SV=1;sp|P09234|RU1C_HUMAN U1 small nuclear ribonucleoprotein C OS=Homo sapiens OX=9606 GN=SNRPC PE=1 SV=1
24.6007	23.749	24.1556	NaN	24.4186	NaN	NaN	NaN	NaN	NaN	NaN	NaN	NaN	NaN	NaN			3	3	3	16.1	16.1	16.1	37.646	0	9.3663	91420000	8	24.231	24.231	NaN	NaN	4	4	0	0	1	NaN	0	O95400	O95400	CD2 antigen cytoplasmic tail-binding protein 2	CD2BP2	1570	sp|O95400|CD2B2_HUMAN CD2 antigen cytoplasmic tail-binding protein 2 OS=Homo sapiens OX=9606 GN=CD2BP2 PE=1 SV=1
25.1423	25.3499	25.6219	25.6124	NaN	NaN	NaN	NaN	NaN	NaN	NaN	NaN	NaN	NaN	NaN			3	3	3	10.3	10.3	10.3	57.56	0	83.327	254500000	14	25.4316	25.4316	NaN	NaN	4	4	0	0	1	NaN	0	P13688;M0R2K4;M0R109	P13688	Carcinoembryonic antigen-related cell adhesion molecule 1	CEACAM1	1806	sp|P13688|CEAM1_HUMAN Carcinoembryonic antigen-related cell adhesion molecule 1 OS=Homo sapiens OX=9606 GN=CEACAM1 PE=1 SV=2
NaN	26.103	25.8829	25.6669	25.9209	NaN	NaN	NaN	NaN	NaN	NaN	NaN	NaN	NaN	NaN			3	3	3	16.6	16.6	16.6	20.63	0	66.569	326180000	14	25.8934	25.8934	NaN	NaN	4	4	0	0	1	NaN	0	Q13442;F8WBW6	Q13442	28 kDa heat- and acid-stable phosphoprotein	PDAP1	2608	sp|Q13442|HAP28_HUMAN 28 kDa heat- and acid-stable phosphoprotein OS=Homo sapiens OX=9606 GN=PDAP1 PE=1 SV=1
24.7726	24.1536	24.536	NaN	24.634	NaN	NaN	NaN	NaN	NaN	NaN	NaN	NaN	NaN	NaN			6	6	6	12.1	12.1	12.1	80.551	0	11.327	175260000	12	24.524	24.524	NaN	NaN	4	4	0	0	1	NaN	0	Q92615;H0Y641;H0Y4V9;A0A087X183	Q92615	La-related protein 4B	LARP4B	3181	sp|Q92615|LAR4B_HUMAN La-related protein 4B OS=Homo sapiens OX=9606 GN=LARP4B PE=1 SV=3
24.8127	24.6805	24.5222	24.7511	NaN	NaN	NaN	NaN	NaN	NaN	NaN	24.7617	24.7047	NaN	NaN			3	3	3	11	11	11	45.786	0	12.201	256970000	13	24.7055	24.6916	NaN	24.7332	6	4	0	2	1	NaN	0	Q9Y679	Q9Y679	Ancient ubiquitous protein 1	AUP1	3942	sp|Q9Y679|AUP1_HUMAN Ancient ubiquitous protein 1 OS=Homo sapiens OX=9606 GN=AUP1 PE=1 SV=2
NaN	24.6694	25.276	NaN	24.6263	NaN	NaN	NaN	NaN	NaN	NaN	NaN	NaN	NaN	NaN			3	3	1	24.1	24.1	7.1	24.751	0	35.321	126250000	10	24.8572	24.8572	NaN	NaN	3	3	0	0	1	NaN	0	H7C0G7;Q9H9Q4;C9JWV4	H7C0G7;Q9H9Q4;C9JWV4	Non-homologous end-joining factor 1	NHEJ1	1154	tr|H7C0G7|H7C0G7_HUMAN Non-homologous end-joining factor 1 (Fragment) OS=Homo sapiens OX=9606 GN=NHEJ1 PE=1 SV=1;sp|Q9H9Q4|NHEJ1_HUMAN Non-homologous end-joining factor 1 OS=Homo sapiens OX=9606 GN=NHEJ1 PE=1 SV=1;tr|C9JWV4|C9JWV4_HUMAN Non-homologous end-
NaN	24.7502	24.593	24.6849	NaN	NaN	NaN	NaN	NaN	NaN	NaN	NaN	NaN	NaN	NaN			3	3	3	35.4	35.4	35.4	17.5	0	26.321	158780000	7	24.676	24.676	NaN	NaN	3	3	0	0	1	NaN	0	H7C3X5;Q13190;E9PNU4	H7C3X5;Q13190	Syntaxin-5	STX5	1164	tr|H7C3X5|H7C3X5_HUMAN Syntaxin-5 (Fragment) OS=Homo sapiens OX=9606 GN=STX5 PE=1 SV=1;sp|Q13190|STX5_HUMAN Syntaxin-5 OS=Homo sapiens OX=9606 GN=STX5 PE=1 SV=2
NaN	26.1732	25.1104	NaN	25.1636	NaN	NaN	NaN	NaN	NaN	NaN	25.4741	25.9269	25.5543	NaN			4	4	4	25.5	25.5	25.5	31.441	0	33.397	304630000	13	25.5671	25.4824	NaN	25.6518	6	3	0	3	1	NaN	0	P19387;H3BRR2	P19387	DNA-directed RNA polymerase II subunit RPB3	POLR2C	1882	sp|P19387|RPB3_HUMAN DNA-directed RNA polymerase II subunit RPB3 OS=Homo sapiens OX=9606 GN=POLR2C PE=1 SV=2
NaN	25.4573	25.4115	NaN	25.8932	NaN	NaN	NaN	NaN	NaN	NaN	NaN	NaN	NaN	NaN			3	3	3	13.1	13.1	13.1	38.963	0	13.362	206300000	14	25.5874	25.5874	NaN	NaN	3	3	0	0	1	NaN	0	Q8NBM4;X6R5E5	Q8NBM4;X6R5E5	Ubiquitin-associated domain-containing protein 2	UBAC2	3071	sp|Q8NBM4|UBAC2_HUMAN Ubiquitin-associated domain-containing protein 2 OS=Homo sapiens OX=9606 GN=UBAC2 PE=1 SV=1;tr|X6R5E5|X6R5E5_HUMAN Ubiquitin-associated domain-containing protein 2 (Fragment) OS=Homo sapiens OX=9606 GN=UBAC2 PE=1 SV=1
NaN	25.161	25.1141	25.3098	NaN	NaN	NaN	NaN	NaN	NaN	NaN	NaN	25.3958	25.499	NaN			2	2	2	5.9	5.9	5.9	49.77	0	6.2721	158870000	11	25.2959	25.1949	NaN	25.4474	5	3	0	2	1	NaN	0	Q96NT5;J3QRF7	Q96NT5;J3QRF7	Proton-coupled folate transporter	SLC46A1	3313	sp|Q96NT5|PCFT_HUMAN Proton-coupled folate transporter OS=Homo sapiens OX=9606 GN=SLC46A1 PE=1 SV=1;tr|J3QRF7|J3QRF7_HUMAN Proton-coupled folate transporter (Fragment) OS=Homo sapiens OX=9606 GN=SLC46A1 PE=1 SV=1
NaN	22.8668	23.6395	NaN	23.2163	NaN	NaN	NaN	NaN	NaN	NaN	NaN	NaN	NaN	NaN			3	3	3	6.2	6.2	6.2	67.638	0	8.4218	47643000	6	23.2409	23.2409	NaN	NaN	3	3	0	0	1	NaN	0	Q9H2C0	Q9H2C0	Gigaxonin	GAN	3505	sp|Q9H2C0|GAN_HUMAN Gigaxonin OS=Homo sapiens OX=9606 GN=GAN PE=1 SV=1
NaN	27.341	27.4337	NaN	27.1954	NaN	NaN	NaN	NaN	NaN	28.1449	27.486	27.4809	28.406	NaN			2	2	2	20.6	20.6	20.6	18.048	0	8.4407	631410000	16	27.6411	27.3234	NaN	27.8795	7	3	0	4	1	NaN	0	Q9NWV4	Q9NWV4	UPF0587 protein C1orf123	C1orf123	3675	sp|Q9NWV4|CZIB_HUMAN CXXC motif containing zinc binding protein OS=Homo sapiens OX=9606 GN=CZIB PE=1 SV=1
NaN	NaN	24.2426	24.5634	24.4595	NaN	NaN	NaN	NaN	NaN	NaN	NaN	NaN	NaN	NaN			7	7	7	24	24	24	42.5	0	25.24	220670000	11	24.4218	24.4218	NaN	NaN	3	3	0	0	1	NaN	0	Q9UH62;H3BV87	Q9UH62	Armadillo repeat-containing X-linked protein 3	ARMCX3	3754	sp|Q9UH62|ARMX3_HUMAN Armadillo repeat-containing X-linked protein 3 OS=Homo sapiens OX=9606 GN=ARMCX3 PE=1 SV=1
24.4785	24.8985	24.8557	NaN	NaN	NaN	NaN	NaN	NaN	NaN	NaN	NaN	NaN	NaN	NaN			5	5	5	13.1	13.1	13.1	59.844	0	12.417	155140000	9	24.7442	24.7442	NaN	NaN	3	3	0	0	1	NaN	0	Q9UHY1;F8W6G1;C9JHZ6	Q9UHY1;F8W6G1	Nuclear receptor-binding protein	NRBP1	3768	sp|Q9UHY1|NRBP_HUMAN Nuclear receptor-binding protein OS=Homo sapiens OX=9606 GN=NRBP1 PE=1 SV=1;tr|F8W6G1|F8W6G1_HUMAN Nuclear receptor-binding protein OS=Homo sapiens OX=9606 GN=NRBP1 PE=1 SV=1
NaN	24.3876	24.3229	26.1034	NaN	NaN	NaN	NaN	NaN	NaN	NaN	NaN	NaN	NaN	NaN			3	3	3	7.6	7.6	7.6	71.639	0	20.044	200350000	17	24.938	24.938	NaN	NaN	3	3	0	0	1	NaN	0	Q9ULX6	Q9ULX6	A-kinase anchor protein 8-like	AKAP8L	3817	sp|Q9ULX6|AKP8L_HUMAN A-kinase anchor protein 8-like OS=Homo sapiens OX=9606 GN=AKAP8L PE=1 SV=4
NaN	NaN	NaN	24.344	25.3404	NaN	NaN	NaN	NaN	NaN	27.0944	27.9859	26.2783	27.4675	NaN			2	2	2	25.3	25.3	25.3	10.264	0	7.4348	294830000	7	26.4184	24.8422	NaN	27.2065	6	2	0	4	1	NaN	0	D6RIE3;D6RGV5;H0UI06;P14406;D6R9C3	D6RIE3;D6RGV5;H0UI06;P14406;D6R9C3	Cytochrome c oxidase subunit 7A2, mitochondrial	COX7A2	770	tr|D6RIE3|D6RIE3_HUMAN Cytochrome c oxidase subunit 7A2, mitochondrial OS=Homo sapiens OX=9606 GN=COX7A2 PE=1 SV=1;tr|D6RGV5|D6RGV5_HUMAN Cytochrome c oxidase subunit 7A2, mitochondrial (Fragment) OS=Homo sapiens OX=9606 GN=COX7A2 PE=1 SV=1;tr|H0UI06|H0UI0
NaN	24.9911	25.0763	NaN	NaN	NaN	NaN	NaN	NaN	NaN	25.0867	26.0068	26.8851	NaN	NaN			3	3	3	17.8	17.8	17.8	18.651	0	15.565	247010000	18	25.6092	25.0337	NaN	25.9928	5	2	0	3	1	NaN	0	H0YNG3;P67812;H0YNX5;H0YNA5;H0YKT4	H0YNG3;P67812;H0YNX5;H0YNA5	Signal peptidase complex catalytic subunit SEC11;Signal peptidase complex catalytic subunit SEC11A;Signal peptidase I	SEC11A	1091	tr|H0YNG3|H0YNG3_HUMAN Signal peptidase complex catalytic subunit SEC11 OS=Homo sapiens OX=9606 GN=SEC11A PE=1 SV=1;sp|P67812|SC11A_HUMAN Signal peptidase complex catalytic subunit SEC11A OS=Homo sapiens OX=9606 GN=SEC11A PE=1 SV=1;tr|H0YNX5|H0YNX5_HUMAN S
NaN	NaN	26.3007	NaN	25.3825	NaN	NaN	NaN	NaN	NaN	25.8453	NaN	25.2002	25.8747	NaN			5	5	5	22.3	22.3	22.3	37.198	0	20.297	321700000	20	25.7207	25.8416	NaN	25.64	5	2	0	3	1	NaN	0	K7ES02;Q13867;K7ESE8;J3KSD8;J3KS79;K7ENH5	K7ES02;Q13867;K7ESE8;J3KSD8	Bleomycin hydrolase	BLMH	1259	tr|K7ES02|K7ES02_HUMAN Bleomycin hydrolase (Fragment) OS=Homo sapiens OX=9606 GN=BLMH PE=1 SV=1;sp|Q13867|BLMH_HUMAN Bleomycin hydrolase OS=Homo sapiens OX=9606 GN=BLMH PE=1 SV=1;tr|K7ESE8|K7ESE8_HUMAN Bleomycin hydrolase (Fragment) OS=Homo sapiens OX=9606
NaN	23.8978	NaN	NaN	24.402	NaN	NaN	NaN	NaN	NaN	NaN	24.8203	24.4929	24.1402	NaN			2	2	2	7.8	7.8	7.8	20.313	0	7.8719	105410000	12	24.3507	24.1499	NaN	24.4845	5	2	0	3	1	NaN	0	P61009	P61009	Signal peptidase complex subunit 3	SPCS3	2341	sp|P61009|SPCS3_HUMAN Signal peptidase complex subunit 3 OS=Homo sapiens OX=9606 GN=SPCS3 PE=1 SV=1
NaN	23.6921	NaN	25.1905	NaN	NaN	NaN	NaN	NaN	NaN	24.7136	25.6247	24.9107	25.2013	NaN			4	4	4	11.6	11.6	11.6	54.705	0	10.668	214340000	12	24.8888	24.4413	NaN	25.1126	6	2	0	4	1	NaN	0	Q8IV08;M0R3G9;M0R1F7	Q8IV08	Phospholipase D3	PLD3	3006	sp|Q8IV08|PLD3_HUMAN 5-3 exonuclease PLD3 OS=Homo sapiens OX=9606 GN=PLD3 PE=1 SV=1
NaN	25.0809	NaN	NaN	NaN	NaN	NaN	NaN	NaN	NaN	24.7351	25.3195	25.6779	24.8982	NaN			9	6	6	17.5	12.7	12.7	84.472	0	33.8	409830000	15	25.1423	25.0809	NaN	25.1577	5	1	0	4	1	NaN	0	A0A2R8YFH5;Q15437;Q5QPE2;Q5QPE1;A0A2R8YF30;A0A2R8Y633;A0A2R8Y7S7	A0A2R8YFH5;Q15437	Protein transport protein Sec23B	SEC23B	336	tr|A0A2R8YFH5|A0A2R8YFH5_HUMAN Protein transport protein SEC23 OS=Homo sapiens OX=9606 GN=SEC23B PE=1 SV=1;sp|Q15437|SC23B_HUMAN Protein transport protein Sec23B OS=Homo sapiens OX=9606 GN=SEC23B PE=1 SV=2
25.6051	NaN	NaN	NaN	NaN	NaN	NaN	NaN	NaN	NaN	26.2351	26.1343	26.1891	26.296	NaN			4	4	4	50	50	50	7.4016	0	7.0268	243940000	15	26.0919	25.6051	NaN	26.2136	5	1	0	4	1	NaN	0	O00244;E5RGN3;E5RIM7	O00244;E5RGN3;E5RIM7	Copper transport protein ATOX1	ATOX1	1296	sp|O00244|ATOX1_HUMAN Copper transport protein ATOX1 OS=Homo sapiens OX=9606 GN=ATOX1 PE=1 SV=1;tr|E5RGN3|E5RGN3_HUMAN Copper transport protein ATOX1 OS=Homo sapiens OX=9606 GN=ATOX1 PE=1 SV=1;tr|E5RIM7|E5RIM7_HUMAN Copper transport protein ATOX1 OS=Homo s
NaN	NaN	NaN	NaN	25.3567	NaN	NaN	NaN	NaN	NaN	27.1166	26.7615	26.6915	26.5709	NaN			2	2	2	19.2	19.2	19.2	15.799	0	13.988	261880000	13	26.4995	25.3567	NaN	26.7851	5	1	0	4	1	NaN	0	P01034	P01034	Cystatin-C	CST3	1632	sp|P01034|CYTC_HUMAN Cystatin-C OS=Homo sapiens OX=9606 GN=CST3 PE=1 SV=1
NaN	NaN	NaN	26.3035	NaN	NaN	NaN	NaN	NaN	NaN	27.3425	26.9731	27.3221	27.5501	NaN			23	2	2	53.2	6.3	6.3	25.664	0	5	984650000	184	27.0983	26.3035	NaN	27.2969	5	1	0	4	1	NaN	0	P09210	P09210	Glutathione S-transferase A2	GSTA2	1725	sp|P09210|GSTA2_HUMAN Glutathione S-transferase A2 OS=Homo sapiens OX=9606 GN=GSTA2 PE=1 SV=4
23.4909	NaN	NaN	NaN	NaN	NaN	NaN	NaN	NaN	NaN	NaN	24.7382	25.5621	25.1063	NaN			4	4	4	12.5	12.5	12.5	56.157	0	17.955	97126000	11	24.7244	23.4909	NaN	25.1355	4	1	0	3	1	NaN	0	P55809	P55809	Succinyl-CoA:3-ketoacid coenzyme A transferase 1, mitochondrial	OXCT1	2310	sp|P55809|SCOT1_HUMAN Succinyl-CoA:3-ketoacid coenzyme A transferase 1, mitochondrial OS=Homo sapiens OX=9606 GN=OXCT1 PE=1 SV=1
NaN	NaN	NaN	NaN	NaN	NaN	NaN	NaN	NaN	NaN	NaN	24.0276	25.0618	28.1835	NaN			3	3	3	29.9	29.9	29.9	16.765	0	8.5364	230110000	14	25.7576	NaN	NaN	25.7576	3	0	0	3	NaN	0	NaN	A2VDF0;X6R6T9;X6RK00	A2VDF0;X6R6T9;X6RK00	Fucose mutarotase	FUOM	435	sp|A2VDF0|FUCM_HUMAN Fucose mutarotase OS=Homo sapiens OX=9606 GN=FUOM PE=1 SV=2;tr|X6R6T9|X6R6T9_HUMAN Fucose mutarotase OS=Homo sapiens OX=9606 GN=FUOM PE=1 SV=1;tr|X6RK00|X6RK00_HUMAN Fucose mutarotase (Fragment) OS=Homo sapiens OX=9606 GN=FUOM PE=1 SV=
NaN	NaN	NaN	NaN	NaN	NaN	NaN	NaN	NaN	NaN	24.825	25.6449	25.7583	25.196	NaN			7	7	7	51.3	51.3	51.3	21.583	0	19.69	115900000	15	25.356	NaN	NaN	25.356	4	0	0	4	NaN	0	NaN	B1AHA8;P09601	B1AHA8;P09601	Heme oxygenase 1	HMOX1	482	tr|B1AHA8|B1AHA8_HUMAN Heme oxygenase (biliverdin-producing) (Fragment) OS=Homo sapiens OX=9606 GN=HMOX1 PE=1 SV=1;sp|P09601|HMOX1_HUMAN Heme oxygenase 1 OS=Homo sapiens OX=9606 GN=HMOX1 PE=1 SV=1
NaN	NaN	NaN	NaN	NaN	NaN	NaN	NaN	NaN	NaN	NaN	24.4613	25.118	24.3813	NaN			4	4	4	5.1	5.1	5.1	133.81	0	15.175	44831000	10	24.6536	NaN	NaN	24.6536	3	0	0	3	NaN	0	NaN	C9JYY6;Q92823;F8W775;A0A087X2B3	C9JYY6;Q92823;F8W775;A0A087X2B3	Neuronal cell adhesion molecule	NRCAM	638	tr|C9JYY6|C9JYY6_HUMAN Neuronal cell adhesion molecule OS=Homo sapiens OX=9606 GN=NRCAM PE=1 SV=3;sp|Q92823|NRCAM_HUMAN Neuronal cell adhesion molecule OS=Homo sapiens OX=9606 GN=NRCAM PE=1 SV=3;tr|F8W775|F8W775_HUMAN Neuronal cell adhesion molecule OS=Hom
NaN	NaN	NaN	NaN	NaN	NaN	NaN	NaN	NaN	NaN	NaN	26.6839	26.8236	27.0943	NaN			5	5	5	25.7	25.7	25.7	35.02	0	31.303	958040000	28	26.8673	NaN	NaN	26.8673	3	0	0	3	NaN	0	NaN	K7EQ02;K7EQ55;K7EK33;Q96EP5	K7EQ02;K7EQ55;K7EK33;Q96EP5	DAZ-associated protein 1	DAZAP1	1235	tr|K7EQ02|K7EQ02_HUMAN DAZ-associated protein 1 (Fragment) OS=Homo sapiens OX=9606 GN=DAZAP1 PE=1 SV=2;tr|K7EQ55|K7EQ55_HUMAN DAZ-associated protein 1 OS=Homo sapiens OX=9606 GN=DAZAP1 PE=1 SV=2;tr|K7EK33|K7EK33_HUMAN DAZ-associated protein 1 OS=Homo sapie
NaN	NaN	NaN	NaN	NaN	NaN	NaN	NaN	NaN	NaN	NaN	25.1957	24.7964	24.8794	NaN			2	2	2	28.4	28.4	28.4	10.4	0	5.3659	49773000	5	24.9572	NaN	NaN	24.9572	3	0	0	3	NaN	0	NaN	P25815	P25815	Protein S100-P	S100P	1953	sp|P25815|S100P_HUMAN Protein S100-P OS=Homo sapiens OX=9606 GN=S100P PE=1 SV=2
NaN	NaN	NaN	NaN	NaN	NaN	NaN	NaN	NaN	NaN	NaN	25.2748	24.9524	25.1718	NaN			6	6	6	7.7	7.7	7.7	112.91	0	20.259	109810000	17	25.133	NaN	NaN	25.133	3	0	0	3	NaN	0	NaN	P49916;K7ERZ5;K7EQB6	P49916;K7ERZ5	DNA ligase 3	LIG3	2219	sp|P49916|DNLI3_HUMAN DNA ligase 3 OS=Homo sapiens OX=9606 GN=LIG3 PE=1 SV=2;tr|K7ERZ5|K7ERZ5_HUMAN DNA ligase 3 (Fragment) OS=Homo sapiens OX=9606 GN=LIG3 PE=1 SV=1
NaN	NaN	NaN	NaN	NaN	NaN	NaN	NaN	NaN	NaN	NaN	25.0284	25.072	25.1909	NaN			6	6	6	14.1	14.1	14.1	72.609	0	23.524	203700000	14	25.0971	NaN	NaN	25.0971	3	0	0	3	NaN	0	NaN	Q14435;E7EUL0;C9J2C3	Q14435;E7EUL0;C9J2C3	Polypeptide N-acetylgalactosaminyltransferase 3	GALNT3	2665	sp|Q14435|GALT3_HUMAN Polypeptide N-acetylgalactosaminyltransferase 3 OS=Homo sapiens OX=9606 GN=GALNT3 PE=1 SV=2;tr|E7EUL0|E7EUL0_HUMAN Polypeptide N-acetylgalactosaminyltransferase 3 OS=Homo sapiens OX=9606 GN=GALNT3 PE=1 SV=1;tr|C9J2C3|C9J2C3_HUMAN Poly
NaN	NaN	NaN	NaN	NaN	NaN	NaN	NaN	NaN	NaN	26.6012	25.2274	25.9269	26.3568	NaN			2	2	2	10.3	10.3	10.3	29.13	0	5.2509	78905000	7	26.0281	NaN	NaN	26.0281	4	0	0	4	NaN	0	NaN	Q16270	Q16270	Insulin-like growth factor-binding protein 7	IGFBP7	2755	sp|Q16270|IBP7_HUMAN Insulin-like growth factor-binding protein 7 OS=Homo sapiens OX=9606 GN=IGFBP7 PE=1 SV=1
NaN	NaN	NaN	NaN	NaN	NaN	NaN	NaN	NaN	NaN	NaN	26.3091	26.289	26.401	NaN			4	4	4	38.4	38.4	38.4	18.986	0	18.851	468850000	10	26.333	NaN	NaN	26.333	3	0	0	3	NaN	0	NaN	Q3ZCW2;U3KQ88;F8WF17;B9A055	Q3ZCW2;U3KQ88	Galectin-related protein;Galectin	LGALSL	2789	sp|Q3ZCW2|LEGL_HUMAN Galectin-related protein OS=Homo sapiens OX=9606 GN=LGALSL PE=1 SV=2;tr|U3KQ88|U3KQ88_HUMAN Galectin (Fragment) OS=Homo sapiens OX=9606 GN=LGALSL PE=1 SV=1
NaN	NaN	NaN	NaN	NaN	NaN	NaN	NaN	NaN	NaN	NaN	25.9229	26.0985	25.8475	NaN			6	6	6	22.8	22.8	22.8	50.993	0	20.499	452780000	22	25.9563	NaN	NaN	25.9563	3	0	0	3	NaN	0	NaN	Q6P9B6;H3BM75;H3BUB0;H3BTC5	Q6P9B6;H3BM75;H3BUB0	TLD domain-containing protein 1	TLDC1	2912	sp|Q6P9B6|MEAK7_HUMAN MTOR-associated protein MEAK7 OS=Homo sapiens OX=9606 GN=MEAK7 PE=1 SV=2;tr|H3BM75|H3BM75_HUMAN MTOR-associated protein MEAK7 OS=Homo sapiens OX=9606 GN=MEAK7 PE=1 SV=1;tr|H3BUB0|H3BUB0_HUMAN MTOR-associated protein MEAK7 (Fragment) O
NaN	NaN	NaN	NaN	NaN	NaN	NaN	NaN	NaN	NaN	26.8367	26.8466	27.244	NaN	NaN			4	4	4	36.3	36.3	36.3	15.278	0	11.373	237900000	13	26.9758	NaN	NaN	26.9758	3	0	0	3	NaN	0	NaN	Q8N5K1;A0A2R8Y540;I3L1N9;D6RCF4	Q8N5K1;A0A2R8Y540;I3L1N9;D6RCF4	CDGSH iron-sulfur domain-containing protein 2	CISD2	3056	sp|Q8N5K1|CISD2_HUMAN CDGSH iron-sulfur domain-containing protein 2 OS=Homo sapiens OX=9606 GN=CISD2 PE=1 SV=1;tr|A0A2R8Y540|A0A2R8Y540_HUMAN CDGSH iron-sulfur domain-containing protein 2 OS=Homo sapiens OX=9606 GN=CISD2 PE=1 SV=1;tr|I3L1N9|I3L1N9_HUMAN CD
NaN	NaN	NaN	NaN	NaN	NaN	NaN	NaN	NaN	NaN	26.124	26.4032	26.4399	25.8387	NaN			5	5	5	18	18	18	40.526	0	60.964	139300000	8	26.2014	NaN	NaN	26.2014	4	0	0	4	NaN	0	NaN	Q9BRQ8	Q9BRQ8	Apoptosis-inducing factor 2	AIFM2	3396	sp|Q9BRQ8|FSP1_HUMAN Ferroptosis suppressor protein 1 OS=Homo sapiens OX=9606 GN=AIFM2 PE=1 SV=1
25.3844	24.4383	25.3672	NaN	25.0427	NaN	NaN	25.5158	NaN	NaN	NaN	NaN	NaN	NaN	NaN			2	2	2	16.7	16.7	16.7	18.771	0	15.211	282840000	16	25.1497	25.0582	25.5158	NaN	5	4	1	0	1	-0.457623	0	F5H459;Q92572	F5H459;Q92572	AP-3 complex subunit sigma-1	AP3S1	942	tr|F5H459|F5H459_HUMAN AP complex subunit sigma OS=Homo sapiens OX=9606 GN=AP3S1 PE=1 SV=1;sp|Q92572|AP3S1_HUMAN AP-3 complex subunit sigma-1 OS=Homo sapiens OX=9606 GN=AP3S1 PE=1 SV=1
25.9852	NaN	25.8939	25.8434	25.2861	NaN	NaN	NaN	26.0011	NaN	NaN	NaN	NaN	NaN	NaN			3	3	3	9.1	9.1	9.1	48.757	0	11.894	319050000	14	25.8019	25.7521	26.0011	NaN	5	4	1	0	1	-0.248989	0	B8ZZG1;Q9NZW5;C9J4Q3;C9JGI8	B8ZZG1;Q9NZW5;C9J4Q3	MAGUK p55 subfamily member 6	MPP6	567	tr|B8ZZG1|B8ZZG1_HUMAN MAGUK p55 subfamily member 6 OS=Homo sapiens OX=9606 GN=MPP6 PE=1 SV=1;sp|Q9NZW5|MPP6_HUMAN MAGUK p55 subfamily member 6 OS=Homo sapiens OX=9606 GN=MPP6 PE=1 SV=2;tr|C9J4Q3|C9J4Q3_HUMAN MAGUK p55 subfamily member 6 (Fragment) OS=Homo
24.4621	24.6482	NaN	24.4514	24.6018	NaN	24.7121	NaN	NaN	NaN	NaN	NaN	NaN	NaN	NaN			6	6	6	24.1	24.1	24.1	41.236	0	35.809	173150000	11	24.5751	24.5409	24.7121	NaN	5	4	1	0	1	-0.171291	0	O75381;K7EK59	O75381	Peroxisomal membrane protein PEX14	PEX14	1489	sp|O75381|PEX14_HUMAN Peroxisomal membrane protein PEX14 OS=Homo sapiens OX=9606 GN=PEX14 PE=1 SV=1
26.8503	NaN	26.9059	26.4954	27.4954	NaN	26.9423	NaN	NaN	NaN	NaN	NaN	NaN	NaN	NaN			4	4	4	29	29	29	29.487	0	10.758	1341800000	12	26.9379	26.9368	26.9423	NaN	5	4	1	0	1	-0.00558901	0	A0A0A0MTR5;E7EWH8;F6UJY1;Q5T013;H0YB18;H0YB70;F6UJY9;J9JIE9	A0A0A0MTR5;E7EWH8;F6UJY1;Q5T013;H0YB18;H0YB70;F6UJY9;J9JIE9	Hydroxypyruvate isomerase;Putative hydroxypyruvate isomerase	HYI	166	tr|A0A0A0MTR5|A0A0A0MTR5_HUMAN Putative hydroxypyruvate isomerase OS=Homo sapiens OX=9606 GN=HYI PE=1 SV=1;tr|E7EWH8|E7EWH8_HUMAN Putative hydroxypyruvate isomerase OS=Homo sapiens OX=9606 GN=HYI PE=1 SV=1;tr|F6UJY1|F6UJY1_HUMAN Putative hydroxypyruvate is
25.1017	24.9738	25.0582	NaN	24.8555	NaN	24.9478	NaN	NaN	NaN	NaN	NaN	NaN	NaN	NaN			5	5	5	12.3	12.3	12.3	78.863	0	7.8555	233720000	8	24.9874	24.9973	24.9478	NaN	5	4	1	0	1	0.0495377	0	O00566;U3KQ48	O00566	U3 small nucleolar ribonucleoprotein protein MPP10	MPHOSPH10	1317	sp|O00566|MPP10_HUMAN U3 small nucleolar ribonucleoprotein protein MPP10 OS=Homo sapiens OX=9606 GN=MPHOSPH10 PE=1 SV=2
25.9319	27.2968	26.0983	NaN	25.9341	NaN	26.2016	NaN	NaN	NaN	27.0074	27.495	27.5237	28.2301	NaN			6	6	6	37.5	37.5	37.5	27.385	0	70.021	1058600000	26	26.8577	26.3153	26.2016	27.5641	9	4	1	4	1	0.113695	0	Q15056	Q15056	Eukaryotic translation initiation factor 4H	EIF4H	2700	sp|Q15056|IF4H_HUMAN Eukaryotic translation initiation factor 4H OS=Homo sapiens OX=9606 GN=EIF4H PE=1 SV=5
25.0104	24.829	24.7761	NaN	24.6716	NaN	24.6701	NaN	NaN	NaN	NaN	NaN	NaN	NaN	NaN			3	3	3	15.8	15.8	15.8	37.866	0	8.8712	184470000	9	24.7914	24.8218	24.6701	NaN	5	4	1	0	1	0.15169	0	O15121	O15121	Sphingolipid delta(4)-desaturase DES1	DEGS1	1364	sp|O15121|DEGS1_HUMAN Sphingolipid delta(4)-desaturase DES1 OS=Homo sapiens OX=9606 GN=DEGS1 PE=1 SV=1
25.4762	26.2183	25.4689	NaN	25.2516	NaN	NaN	25.3696	NaN	NaN	NaN	NaN	NaN	NaN	NaN			7	7	7	26.3	26.3	26.3	56.527	0	61.872	364350000	9	25.5569	25.6037	25.3696	NaN	5	4	1	0	1	0.234151	0	Q7Z434	Q7Z434	Mitochondrial antiviral-signaling protein	MAVS	2963	sp|Q7Z434|MAVS_HUMAN Mitochondrial antiviral-signaling protein OS=Homo sapiens OX=9606 GN=MAVS PE=1 SV=2
NaN	25.8054	25.8073	26.4466	25.8998	NaN	NaN	NaN	NaN	25.4011	NaN	NaN	NaN	25.2439	NaN			3	3	3	11.3	11.3	11.3	30.045	0	13.216	250430000	18	25.7674	25.9898	25.4011	25.2439	6	4	1	1	1	0.58868	0	H0Y6T7;Q92542;Q5T205;H0Y3Z4	H0Y6T7;Q92542	Nicastrin	NCSTN	1054	tr|H0Y6T7|H0Y6T7_HUMAN Nicastrin (Fragment) OS=Homo sapiens OX=9606 GN=NCSTN PE=1 SV=1;sp|Q92542|NICA_HUMAN Nicastrin OS=Homo sapiens OX=9606 GN=NCSTN PE=1 SV=2
24.99	25.0395	24.4451	24.7805	NaN	24.1033	NaN	NaN	NaN	NaN	NaN	NaN	NaN	25.1803	NaN			4	4	4	23.2	23.2	23.2	23.772	0	17.017	254920000	13	24.7564	24.8138	24.1033	25.1803	6	4	1	1	1	0.710505	0	O95816	O95816	BAG family molecular chaperone regulator 2	BAG2	1593	sp|O95816|BAG2_HUMAN BAG family molecular chaperone regulator 2 OS=Homo sapiens OX=9606 GN=BAG2 PE=1 SV=1
24.3541	25.1091	NaN	25.5227	24.7376	NaN	24.2039	NaN	NaN	NaN	NaN	NaN	24.9913	NaN	NaN			2	2	1	4.5	4.5	3.2	55.01	0	19.215	312920000	40	24.8198	24.9309	24.2039	24.9913	6	4	1	1	1	0.726999	0	Q01650;H0YJ95;A0A0C4DGL4;G3V4Z6;Q92536	Q01650;H0YJ95;A0A0C4DGL4;G3V4Z6;Q92536	Large neutral amino acids transporter small subunit 1;Y+L amino acid transporter 2	SLC7A5;SLC7A7;SLC7A6	2484	sp|Q01650|LAT1_HUMAN Large neutral amino acids transporter small subunit 1 OS=Homo sapiens OX=9606 GN=SLC7A5 PE=1 SV=2;tr|H0YJ95|H0YJ95_HUMAN Y+L amino acid transporter 1 (Fragment) OS=Homo sapiens OX=9606 GN=SLC7A7 PE=1 SV=1;tr|A0A0C4DGL4|A0A0C4DGL4_HUMAN
25.2408	25.4314	25.3684	25.5559	NaN	24.0216	NaN	NaN	NaN	NaN	NaN	NaN	NaN	NaN	NaN			3	3	3	8.6	8.6	8.6	42.153	0	23.991	269860000	13	25.1236	25.3991	24.0216	NaN	5	4	1	0	1	1.37755	0	Q16186;A0A087WUX6;A0A087WX59	Q16186	Proteasomal ubiquitin receptor ADRM1	ADRM1	2752	sp|Q16186|ADRM1_HUMAN Proteasomal ubiquitin receptor ADRM1 OS=Homo sapiens OX=9606 GN=ADRM1 PE=1 SV=2
NaN	24.7225	NaN	25.1465	24.6818	NaN	NaN	NaN	26.0698	NaN	26.9454	26.3789	25.3445	25.5785	NaN			3	3	3	19.8	19.8	19.8	23.128	0	14.139	270260000	13	25.6085	24.8503	26.0698	26.0618	8	3	1	4	1	-1.21951	0	Q8WW59	Q8WW59	SPRY domain-containing protein 4	SPRYD4	3156	sp|Q8WW59|SPRY4_HUMAN SPRY domain-containing protein 4 OS=Homo sapiens OX=9606 GN=SPRYD4 PE=1 SV=2
25.1488	25.65	25.8843	NaN	NaN	NaN	26.0581	NaN	NaN	NaN	NaN	NaN	26.5876	NaN	NaN			3	3	3	18.1	18.1	18.1	27.598	0	13.667	271910000	11	25.8658	25.561	26.0581	26.5876	5	3	1	1	1	-0.49704	0	Q2TAA2;H7C5G1;F8WF34	Q2TAA2;H7C5G1	Isoamyl acetate-hydrolyzing esterase 1 homolog	IAH1	2780	sp|Q2TAA2|IAH1_HUMAN Isoamyl acetate-hydrolyzing esterase 1 homolog OS=Homo sapiens OX=9606 GN=IAH1 PE=1 SV=1;tr|H7C5G1|H7C5G1_HUMAN Isoamyl acetate-hydrolyzing esterase 1 homolog (Fragment) OS=Homo sapiens OX=9606 GN=IAH1 PE=1 SV=1
25.6572	25.5385	25.5939	NaN	NaN	NaN	25.9268	NaN	NaN	NaN	NaN	NaN	NaN	NaN	NaN			2	2	2	9.2	9.2	9.2	38.287	0	29.101	362300000	11	25.6791	25.5965	25.9268	NaN	4	3	1	0	1	-0.330321	0	O14828	O14828	Secretory carrier-associated membrane protein 3	SCAMP3	1343	sp|O14828|SCAM3_HUMAN Secretory carrier-associated membrane protein 3 OS=Homo sapiens OX=9606 GN=SCAMP3 PE=1 SV=3
25.8173	NaN	25.3401	NaN	25.6495	NaN	25.9088	NaN	NaN	NaN	NaN	NaN	NaN	NaN	NaN			3	3	3	9.1	9.1	9.1	58.24	0	16.337	320410000	12	25.6789	25.6023	25.9088	NaN	4	3	1	0	1	-0.306447	0	P35269;M0R0Z3;M0R0R9;M0QXD6	P35269	General transcription factor IIF subunit 1	GTF2F1	2059	sp|P35269|T2FA_HUMAN General transcription factor IIF subunit 1 OS=Homo sapiens OX=9606 GN=GTF2F1 PE=1 SV=2
NaN	25.4631	25.4711	NaN	25.244	NaN	NaN	NaN	25.603	NaN	NaN	NaN	NaN	NaN	NaN			3	3	3	9.4	9.4	9.4	46.9	0	15.136	224750000	16	25.4453	25.3927	25.603	NaN	4	3	1	0	1	-0.210272	0	Q15018	Q15018	BRISC complex subunit Abro1	FAM175B	2692	sp|Q15018|ABRX2_HUMAN BRISC complex subunit Abraxas 2 OS=Homo sapiens OX=9606 GN=ABRAXAS2 PE=1 SV=2
NaN	26.0467	26.068	NaN	26.0177	NaN	NaN	NaN	26.201	NaN	25.7457	26.0249	25.8074	NaN	NaN			2	2	2	24.5	24.5	24.5	17.419	0	60.786	495230000	14	25.9873	26.0441	26.201	25.8593	7	3	1	3	1	-0.156821	0	Q6RW13	Q6RW13	Type-1 angiotensin II receptor-associated protein	AGTRAP	2919	sp|Q6RW13|ATRAP_HUMAN Type-1 angiotensin II receptor-associated protein OS=Homo sapiens OX=9606 GN=AGTRAP PE=1 SV=1
25.4813	25.1134	NaN	NaN	26.1553	25.6273	NaN	NaN	NaN	NaN	26.2002	26.4199	26.1588	25.9658	NaN			5	5	5	7.4	7.4	7.4	118.39	0	15.405	351350000	15	25.8902	25.5833	25.6273	26.1862	8	3	1	4	1	-0.0440286	0	Q13308;C9JQR6;H0Y8F1	Q13308;C9JQR6;H0Y8F1	Inactive tyrosine-protein kinase 7	PTK7	2596	sp|Q13308|PTK7_HUMAN Inactive tyrosine-protein kinase 7 OS=Homo sapiens OX=9606 GN=PTK7 PE=1 SV=2;tr|C9JQR6|C9JQR6_HUMAN Inactive tyrosine-protein kinase 7 (Fragment) OS=Homo sapiens OX=9606 GN=PTK7 PE=1 SV=1;tr|H0Y8F1|H0Y8F1_HUMAN Inactive tyrosine-protei
NaN	24.8426	24.8047	25.2485	NaN	NaN	24.9322	NaN	NaN	NaN	NaN	24.7508	24.5929	24.4151	NaN			8	8	8	15.9	15.9	15.9	78.808	0	63.234	289300000	19	24.7981	24.9653	24.9322	24.5863	7	3	1	3	1	0.0330067	0	A0A0A0MSB8;Q9UPT5;A0A0A0MRE1;B4DJ07;C9JKC2;K7ERQ5;C9JME6;B5MCY9	A0A0A0MSB8;Q9UPT5;A0A0A0MRE1;B4DJ07	Exocyst complex component 7	EXOC7	146	tr|A0A0A0MSB8|A0A0A0MSB8_HUMAN Exocyst complex component 7 OS=Homo sapiens OX=9606 GN=EXOC7 PE=1 SV=1;sp|Q9UPT5|EXOC7_HUMAN Exocyst complex component 7 OS=Homo sapiens OX=9606 GN=EXOC7 PE=1 SV=3;tr|A0A0A0MRE1|A0A0A0MRE1_HUMAN Exocyst complex component 7 (F
NaN	25.6692	25.4285	26.7182	NaN	NaN	NaN	NaN	25.8832	NaN	NaN	25.6493	25.2662	25.6447	NaN			4	4	4	20	20	20	29.669	0	7.6711	450200000	13	25.7513	25.9386	25.8832	25.5201	7	3	1	3	1	0.0554187	0	Q6DKI1;R4GMU7	Q6DKI1;R4GMU7	60S ribosomal protein L7-like 1	RPL7L1	2888	sp|Q6DKI1|RL7L_HUMAN 60S ribosomal protein L7-like 1 OS=Homo sapiens OX=9606 GN=RPL7L1 PE=1 SV=2;tr|R4GMU7|R4GMU7_HUMAN 60S ribosomal protein L7-like 1 (Fragment) OS=Homo sapiens OX=9606 GN=RPL7L1 PE=1 SV=2
24.8726	24.3391	24.647	NaN	NaN	NaN	NaN	NaN	24.5489	NaN	NaN	NaN	NaN	NaN	NaN			4	4	4	7.3	7.3	7.3	116.04	0	17.788	162840000	13	24.6019	24.6196	24.5489	NaN	4	3	1	0	1	0.0706876	0	P06756;H7BZG1	P06756	Integrin alpha-V;Integrin alpha-V heavy chain;Integrin alpha-V light chain	ITGAV	1685	sp|P06756|ITAV_HUMAN Integrin alpha-V OS=Homo sapiens OX=9606 GN=ITGAV PE=1 SV=2
NaN	26.1067	NaN	26.1753	26.1765	NaN	NaN	NaN	26.0102	NaN	26.0925	26.5247	NaN	26.1608	NaN			3	3	3	29	29	29	21.537	0	11.778	372000000	13	26.1781	26.1528	26.0102	26.2593	7	3	1	3	1	0.142665	0	Q5TD07;P16083;Q5TD05;A2A2U4	Q5TD07;P16083;Q5TD05	Ribosyldihydronicotinamide dehydrogenase [quinone]	NQO2	1837	tr|Q5TD07|Q5TD07_HUMAN Ribosyldihydronicotinamide dehydrogenase [quinone] OS=Homo sapiens OX=9606 GN=NQO2 PE=1 SV=1;sp|P16083|NQO2_HUMAN Ribosyldihydronicotinamide dehydrogenase [quinone] OS=Homo sapiens OX=9606 GN=NQO2 PE=1 SV=5;tr|Q5TD05|Q5TD05_HUMAN Rib
NaN	NaN	26.9575	26.9157	26.7703	NaN	NaN	NaN	26.6252	NaN	26.5374	26.8038	NaN	NaN	NaN			3	3	3	31.7	31.7	31.7	19.325	0	236.32	1503000000	36	26.7683	26.8812	26.6252	26.6706	6	3	1	2	1	0.255957	0	J3KQ48;Q9Y3E5	J3KQ48;Q9Y3E5	Peptidyl-tRNA hydrolase 2, mitochondrial	PTRH2	1194	tr|J3KQ48|J3KQ48_HUMAN Aminoacyl-tRNA hydrolase OS=Homo sapiens OX=9606 GN=PTRH2 PE=1 SV=1;sp|Q9Y3E5|PTH2_HUMAN Peptidyl-tRNA hydrolase 2, mitochondrial OS=Homo sapiens OX=9606 GN=PTRH2 PE=1 SV=1
25.6901	NaN	24.661	NaN	26.3108	NaN	NaN	25.0713	NaN	NaN	NaN	NaN	NaN	NaN	NaN			4	4	4	8.7	8.7	8.7	75.665	0	9.2786	287790000	7	25.4333	25.554	25.0713	NaN	4	3	1	0	1	0.482646	0	Q96FV9;A0A087WWS1;R4GMN4	Q96FV9;A0A087WWS1	THO complex subunit 1	THOC1	54	sp|Q96FV9|THOC1_HUMAN THO complex subunit 1 OS=Homo sapiens OX=9606 GN=THOC1 PE=1 SV=1;tr|A0A087WWS1|A0A087WWS1_HUMAN THO complex subunit 1 OS=Homo sapiens OX=9606 GN=THOC1 PE=1 SV=1
NaN	NaN	25.0673	26.1473	25.5273	NaN	NaN	NaN	NaN	24.9128	24.6619	NaN	25.0405	25.0645	NaN			11	4	4	16.7	8.6	8.6	74.761	0	12.67	245770000	23	25.2031	25.5806	24.9128	24.9223	7	3	1	3	1	0.667846	0	O75746;F8W9J0;H0YFB2;B4DGK6	O75746	Calcium-binding mitochondrial carrier protein Aralar1	SLC25A12	1509	sp|O75746|CMC1_HUMAN Calcium-binding mitochondrial carrier protein Aralar1 OS=Homo sapiens OX=9606 GN=SLC25A12 PE=1 SV=2
NaN	26.2495	NaN	NaN	27.4007	NaN	NaN	NaN	26.5305	NaN	NaN	27.0754	27.2395	27.153	NaN			3	3	3	49.2	49.2	49.2	13.623	0	35.765	738530000	20	26.9414	26.8251	26.5305	27.156	6	2	1	3	1	0.294594	0	Q9UHA4	Q9UHA4	Ragulator complex protein LAMTOR3	LAMTOR3	3755	sp|Q9UHA4|LTOR3_HUMAN Ragulator complex protein LAMTOR3 OS=Homo sapiens OX=9606 GN=LAMTOR3 PE=1 SV=1
NaN	NaN	NaN	24.5106	NaN	26.4191	NaN	NaN	NaN	NaN	25.3729	25.4057	26.4339	26.1496	NaN			7	7	7	9.2	9.2	9.2	106.05	0	15.198	219780000	19	25.7153	24.5106	26.4191	25.8405	6	1	1	4	1	-1.90843	0	A0A2R8YEC9;O00462;E9PFW2;A0A2R8Y524;A0A2R8YE79;A0A2R8YCE9;A0A2R8Y4U7;A0A2R8Y211;A0A2R8Y7A0;A0A2R8Y7A7;A0A2R8Y7N1	A0A2R8YEC9;O00462;E9PFW2;A0A2R8Y524;A0A2R8YE79;A0A2R8YCE9;A0A2R8Y4U7;A0A2R8Y211	Beta-mannosidase	MANBA	332	tr|A0A2R8YEC9|A0A2R8YEC9_HUMAN Beta-mannosidase OS=Homo sapiens OX=9606 GN=MANBA PE=1 SV=1;sp|O00462|MANBA_HUMAN Beta-mannosidase OS=Homo sapiens OX=9606 GN=MANBA PE=1 SV=3;tr|E9PFW2|E9PFW2_HUMAN Beta-mannosidase OS=Homo sapiens OX=9606 GN=MANBA PE=1 SV=1;
NaN	24.9219	NaN	NaN	NaN	26.3902	NaN	NaN	NaN	NaN	NaN	24.9602	25.5827	25.4092	NaN			4	4	4	11.3	11.3	11.3	54.066	0	11.28	162800000	6	25.4529	24.9219	26.3902	25.3174	5	1	1	3	1	-1.46831	0	Q9BTY2	Q9BTY2	Plasma alpha-L-fucosidase	FUCA2	3416	sp|Q9BTY2|FUCO2_HUMAN Plasma alpha-L-fucosidase OS=Homo sapiens OX=9606 GN=FUCA2 PE=1 SV=2
24.5066	NaN	NaN	NaN	NaN	NaN	25.1592	NaN	NaN	NaN	NaN	25.1508	25.1107	25.132	NaN			5	5	5	17.9	17.9	17.9	43.589	0	8.2368	253120000	16	25.0119	24.5066	25.1592	25.1312	5	1	1	3	1	-0.652555	0	Q8WWV3;G3V1R2	Q8WWV3	Reticulon-4-interacting protein 1, mitochondrial	RTN4IP1	3160	sp|Q8WWV3|RT4I1_HUMAN Reticulon-4-interacting protein 1, mitochondrial OS=Homo sapiens OX=9606 GN=RTN4IP1 PE=1 SV=2
25.867	NaN	NaN	NaN	NaN	NaN	NaN	NaN	NaN	25.6991	NaN	25.8092	25.8722	25.813	NaN			3	3	3	29.1	29.1	29.1	16.925	0	7.2114	267740000	12	25.8121	25.867	25.6991	25.8315	5	1	1	3	1	0.167917	0	C9JLU1;P52434	C9JLU1;P52434	DNA-directed RNA polymerases I, II, and III subunit RPABC3	POLR2H	618	tr|C9JLU1|C9JLU1_HUMAN DNA-directed RNA polymerases I, II, and III subunit RPABC3 (Fragment) OS=Homo sapiens OX=9606 GN=POLR2H PE=1 SV=8;sp|P52434|RPAB3_HUMAN DNA-directed RNA polymerases I, II, and III subunit RPABC3 OS=Homo sapiens OX=9606 GN=POLR2H PE=1
NaN	NaN	NaN	NaN	NaN	26.132	NaN	NaN	NaN	NaN	26.002	26.4019	26.0702	26.2048	NaN			5	5	5	17.9	17.9	17.9	53.806	0	27.397	288040000	14	26.1622	NaN	26.132	26.1697	5	0	1	4	1	NaN	0	A0A0C4DFZ2;P15289	A0A0C4DFZ2;P15289	Arylsulfatase A;Arylsulfatase A component B;Arylsulfatase A component C	ARSA	189	tr|A0A0C4DFZ2|A0A0C4DFZ2_HUMAN Arylsulfatase A OS=Homo sapiens OX=9606 GN=ARSA PE=1 SV=1;sp|P15289|ARSA_HUMAN Arylsulfatase A OS=Homo sapiens OX=9606 GN=ARSA PE=1 SV=3
NaN	NaN	NaN	NaN	NaN	NaN	NaN	NaN	24.6749	NaN	27.7456	27.268	27.1817	27.2546	NaN			2	2	2	23.1	23.1	23.1	12.815	0	17.733	284580000	11	26.825	NaN	24.6749	27.3625	5	0	1	4	1	NaN	0	B0YIW2;P02656	B0YIW2;P02656	Apolipoprotein C-III	APOC3	480	tr|B0YIW2|B0YIW2_HUMAN Apolipoprotein C-III OS=Homo sapiens OX=9606 GN=APOC3 PE=1 SV=1;sp|P02656|APOC3_HUMAN Apolipoprotein C-III OS=Homo sapiens OX=9606 GN=APOC3 PE=1 SV=1
NaN	NaN	NaN	NaN	NaN	25.9165	NaN	NaN	NaN	NaN	26.104	26.2678	26.1216	26.1804	NaN			5	5	5	30.7	30.7	30.7	21.275	0	11.92	190430000	17	26.1181	NaN	25.9165	26.1685	5	0	1	4	1	NaN	0	P05090;C9JF17;C9JX71	P05090;C9JF17	Apolipoprotein D	APOD	606	sp|P05090|APOD_HUMAN Apolipoprotein D OS=Homo sapiens OX=9606 GN=APOD PE=1 SV=1;tr|C9JF17|C9JF17_HUMAN Apolipoprotein D (Fragment) OS=Homo sapiens OX=9606 GN=APOD PE=1 SV=1
NaN	NaN	NaN	NaN	NaN	25.955	NaN	NaN	NaN	NaN	25.9512	26.2245	26.3477	25.8561	NaN			8	8	8	9.6	9.6	9.6	141.48	0	28.709	256760000	19	26.0669	NaN	25.955	26.0949	5	0	1	4	1	NaN	0	P08183	P08183	Multidrug resistance protein 1	ABCB1	1708	sp|P08183|MDR1_HUMAN ATP-dependent translocase ABCB1 OS=Homo sapiens OX=9606 GN=ABCB1 PE=1 SV=3
NaN	NaN	NaN	NaN	NaN	26.7239	NaN	NaN	NaN	NaN	26.9519	26.9493	26.6577	26.8352	NaN			6	6	6	24.9	24.9	24.9	26.559	0	17.234	307450000	10	26.8236	NaN	26.7239	26.8485	5	0	1	4	1	NaN	0	P21266;A0A0A0MTN3	P21266;A0A0A0MTN3	Glutathione S-transferase Mu 3	GSTM3	1901	sp|P21266|GSTM3_HUMAN Glutathione S-transferase Mu 3 OS=Homo sapiens OX=9606 GN=GSTM3 PE=1 SV=3;tr|A0A0A0MTN3|A0A0A0MTN3_HUMAN Glutathione S-transferase OS=Homo sapiens OX=9606 GN=GSTM3 PE=1 SV=1
NaN	NaN	NaN	NaN	NaN	30.5941	NaN	NaN	NaN	NaN	NaN	29.7967	28.5683	27.6663	NaN			2	2	2	0.8	0.8	0.8	357.52	0.006465	2.1026	1183600000	14	29.1564	NaN	30.5941	28.6771	4	0	1	3	1	NaN	0	P49454	P49454	Centromere protein F	CENPF	2198	sp|P49454|CENPF_HUMAN Centromere protein F OS=Homo sapiens OX=9606 GN=CENPF PE=1 SV=3
NaN	NaN	NaN	NaN	NaN	26.3127	NaN	NaN	NaN	NaN	27.6557	26.9078	27.0651	27.3152	NaN			10	10	10	42.5	42.5	42.5	36.879	0	69.899	503530000	28	27.0513	NaN	26.3127	27.2359	5	0	1	4	1	NaN	0	Q5VT79;P13928;B4DTF2;A0A075B752;A0A087WUP0;A0A087WTN9;A0A075B765	Q5VT79;P13928;B4DTF2;A0A075B752;A0A087WUP0;A0A087WTN9	Annexin A8-like protein 2;Annexin A8;Annexin	ANXA8L2;ANXA8;ANXA8L1	2873	sp|Q5VT79|AXA81_HUMAN Annexin A8-like protein 1 OS=Homo sapiens OX=9606 GN=ANXA8L1 PE=2 SV=2;sp|P13928|ANXA8_HUMAN Annexin A8 OS=Homo sapiens OX=9606 GN=ANXA8 PE=1 SV=3;tr|B4DTF2|B4DTF2_HUMAN Annexin OS=Homo sapiens OX=9606 GN=ANXA8L1 PE=1 SV=1;tr|A0A075B7
NaN	NaN	NaN	NaN	NaN	24.9344	NaN	NaN	NaN	NaN	25.077	25.3502	25.298	25.7809	NaN			5	5	5	3.3	3.3	3.3	205.11	0	21.093	157500000	15	25.2881	NaN	24.9344	25.3765	5	0	1	4	1	NaN	0	Q8TEM1	Q8TEM1	Nuclear pore membrane glycoprotein 210	NUP210	3134	sp|Q8TEM1|PO210_HUMAN Nuclear pore membrane glycoprotein 210 OS=Homo sapiens OX=9606 GN=NUP210 PE=1 SV=3
25.1505	26.4671	26.0567	25.2439	26.3919	NaN	26.3693	26.1514	NaN	NaN	NaN	NaN	NaN	NaN	NaN			4	4	4	42.4	42.4	42.4	9.7931	0	23.448	608320000	26	25.9758	25.862	26.2603	NaN	7	5	2	0	0.437978	-0.398307	-0.842424	A2A2D0;P16949;E5RGX5;Q93045	A2A2D0;P16949	Stathmin	STMN1	431	tr|A2A2D0|A2A2D0_HUMAN Stathmin (Fragment) OS=Homo sapiens OX=9606 GN=STMN1 PE=1 SV=8;sp|P16949|STMN1_HUMAN Stathmin OS=Homo sapiens OX=9606 GN=STMN1 PE=1 SV=3
25.1335	24.9279	24.7876	24.5256	25.2176	NaN	24.9231	25.1906	NaN	NaN	NaN	NaN	NaN	NaN	NaN			5	5	5	14.4	14.4	14.4	78.576	0	32.403	332560000	15	24.958	24.9184	25.0569	NaN	7	5	2	0	0.555377	-0.138418	-0.631629	Q6NZY4;F5H6J5;F5GX80	Q6NZY4;F5H6J5;F5GX80	Zinc finger CCHC domain-containing protein 8	ZCCHC8	2901	sp|Q6NZY4|ZCHC8_HUMAN Zinc finger CCHC domain-containing protein 8 OS=Homo sapiens OX=9606 GN=ZCCHC8 PE=1 SV=2;tr|F5H6J5|F5H6J5_HUMAN Zinc finger CCHC domain-containing protein 8 (Fragment) OS=Homo sapiens OX=9606 GN=ZCCHC8 PE=1 SV=1;tr|F5GX80|F5GX80_HUMAN
26.5248	25.6636	26.9132	26.7357	26.3037	NaN	NaN	26.709	26.3266	NaN	26.2363	26.453	26.5976	26.7415	NaN			7	6	5	24.5	21.4	18	40.45	0	28.734	832270000	29	26.4732	26.4282	26.5178	26.5071	11	5	2	4	0.82133	-0.0895992	-0.237996	P04899;P63096;P09471;A0A3B3ITM0;H3BTM2;A0A1W2PP38	P04899	Guanine nucleotide-binding protein G(i) subunit alpha-2	GNAI2	1657	sp|P04899|GNAI2_HUMAN Guanine nucleotide-binding protein G(i) subunit alpha-2 OS=Homo sapiens OX=9606 GN=GNAI2 PE=1 SV=3
24.6414	25.534	24.8077	24.8745	24.7662	25.0831	NaN	NaN	24.8745	NaN	24.7528	25.2513	24.4685	NaN	NaN			4	3	3	7.4	6	6	102.45	0	12.795	296280000	16	24.9054	24.9248	24.9788	24.8242	10	5	2	3	0.84846	-0.0540058	-0.201215	Q15269;A0A0B4J2E5;A0A0J9YX21	Q15269;A0A0B4J2E5	Periodic tryptophan protein 2 homolog	PWP2	182	sp|Q15269|PWP2_HUMAN Periodic tryptophan protein 2 homolog OS=Homo sapiens OX=9606 GN=PWP2 PE=2 SV=2;tr|A0A0B4J2E5|A0A0B4J2E5_HUMAN Uncharacterized protein OS=Homo sapiens OX=9606 GN=LOC102724159 PE=1 SV=1
24.7534	25.4636	25.2656	24.9185	25.0819	NaN	NaN	NaN	25.2349	24.8639	NaN	24.4451	23.9798	NaN	NaN			5	5	5	2.2	2.2	2.2	336.17	0	28.044	331100000	24	24.8897	25.0966	25.0494	24.2125	9	5	2	2	0.84634	0.0471838	0.204077	H7BXZ5;O60229;E9PIH7;Q86VW2	H7BXZ5;O60229	Kalirin	KALRN	1142	tr|H7BXZ5|H7BXZ5_HUMAN Non-specific serine/threonine protein kinase (Fragment) OS=Homo sapiens OX=9606 GN=KALRN PE=1 SV=1;sp|O60229|KALRN_HUMAN Kalirin OS=Homo sapiens OX=9606 GN=KALRN PE=1 SV=3
24.929	24.3779	24.3231	25.5689	24.7593	NaN	24.8741	NaN	NaN	24.5681	26.7456	26.0071	26.3035	26.1654	NaN			5	5	5	12	12	12	53.688	0	14.355	418200000	28	25.3293	24.7916	24.7211	26.3054	11	5	2	4	0.862073	0.0705013	0.182885	P04066	P04066	Tissue alpha-L-fucosidase	FUCA1	1645	sp|P04066|FUCO_HUMAN Tissue alpha-L-fucosidase OS=Homo sapiens OX=9606 GN=FUCA1 PE=1 SV=4
25.2257	25.9424	25.4831	25.6666	25.5645	NaN	25.5882	NaN	NaN	25.1511	NaN	NaN	NaN	NaN	NaN			3	3	3	49.7	49.7	49.7	19.529	0	34.925	360980000	5	25.5174	25.5764	25.3697	NaN	7	5	2	0	0.404919	0.206793	0.909241	P49006	P49006	MARCKS-related protein	MARCKSL1	2186	sp|P49006|MRP_HUMAN MARCKS-related protein OS=Homo sapiens OX=9606 GN=MARCKSL1 PE=1 SV=2
25.4368	25.9145	25.8086	25.1763	25.7547	NaN	NaN	25.4541	24.8426	NaN	25.6944	26.4469	25.6252	25.8588	NaN			4	4	4	26.6	26.6	26.6	18.657	0	11.442	402790000	17	25.6375	25.6182	25.1483	25.9063	11	5	2	4	0.15355	0.469841	1.68122	H0Y6Y8;B1AL05;Q8N983;H0YBU8;M0R051	H0Y6Y8;B1AL05;Q8N983;H0YBU8	39S ribosomal protein L43, mitochondrial	MRPL43	490	tr|H0Y6Y8|H0Y6Y8_HUMAN 39S ribosomal protein L43, mitochondrial (Fragment) OS=Homo sapiens OX=9606 GN=MRPL43 PE=1 SV=1;tr|B1AL05|B1AL05_HUMAN 39S ribosomal protein L43, mitochondrial OS=Homo sapiens OX=9606 GN=MRPL43 PE=1 SV=1;sp|Q8N983|RM43_HUMAN 39S ribo
25.8555	26.5238	26.3776	27.0547	25.8849	NaN	25.8986	NaN	NaN	25.7368	NaN	NaN	NaN	NaN	NaN			3	3	3	17.4	17.4	17.4	37.194	0	26.068	549430000	12	26.1903	26.3393	25.8177	NaN	7	5	2	0	0.22226	0.521608	1.39343	P40199;M0QYM2	P40199	Carcinoembryonic antigen-related cell adhesion molecule 6	CEACAM6	2102	sp|P40199|CEAM6_HUMAN Carcinoembryonic antigen-related cell adhesion molecule 6 OS=Homo sapiens OX=9606 GN=CEACAM6 PE=1 SV=3
24.2807	24.0634	24.3898	24.1319	NaN	NaN	24.8369	24.6194	NaN	NaN	24.2656	NaN	25.1049	NaN	NaN	+	3NT_Control	5	5	5	32.2	32.2	32.2	24.178	0	15.574	177630000	13	24.4616	24.2164	24.7281	24.6853	8	4	2	2	0.0164776	-0.511678	-3.97443	Q9GZP4;X6RHB9;X6R8S9	Q9GZP4	PITH domain-containing protein 1	PITHD1	3480	sp|Q9GZP4|PITH1_HUMAN PITH domain-containing protein 1 OS=Homo sapiens OX=9606 GN=PITHD1 PE=1 SV=1
25.4126	24.9016	25.0043	NaN	25.191	26.6006	25.0341	NaN	NaN	NaN	27.3306	26.0287	26.8676	26.8877	NaN			3	3	3	14.6	14.6	14.6	22.763	0	11.858	490060000	44	25.9259	25.1274	25.8173	26.7786	10	4	2	4	0.246266	-0.689961	-1.35714	P45877	P45877	Peptidyl-prolyl cis-trans isomerase C	PPIC	2142	sp|P45877|PPIC_HUMAN Peptidyl-prolyl cis-trans isomerase C OS=Homo sapiens OX=9606 GN=PPIC PE=1 SV=1
25.408	25.4861	25.4482	NaN	24.8702	NaN	25.9852	25.6026	NaN	NaN	NaN	NaN	NaN	NaN	NaN			7	7	7	14	14	14	59.075	0	45.261	758180000	23	25.4667	25.3031	25.7939	NaN	6	4	2	0	0.11821	-0.490737	-1.98436	H0YHG0;P82979;F8VZQ9;F8VS12;H0YHH1;H0YIP3;H0YHR6;A0A2R8Y716;Q6Y2X3	H0YHG0;P82979;F8VZQ9	SAP domain-containing ribonucleoprotein	SARNP	1078	tr|H0YHG0|H0YHG0_HUMAN Uncharacterized protein (Fragment) OS=Homo sapiens OX=9606 PE=1 SV=1;sp|P82979|SARNP_HUMAN SAP domain-containing ribonucleoprotein OS=Homo sapiens OX=9606 GN=SARNP PE=1 SV=3;tr|F8VZQ9|F8VZQ9_HUMAN SAP domain-containing ribonucleoprot
26.7781	26.4857	25.9415	NaN	25.6696	NaN	26.9333	26.1553	NaN	NaN	NaN	NaN	NaN	NaN	NaN			2	2	2	11.4	11.4	11.4	41.454	0	9.195	558850000	13	26.3272	26.2187	26.5443	NaN	6	4	2	0	0.506684	-0.325552	-0.728469	F8VX11;E7EX17;P23588;F8W0K0;F8VRU1;F8VYE9;F8VSC7;F8VP89	F8VX11;E7EX17;P23588;F8W0K0;F8VRU1;F8VYE9;F8VSC7;F8VP89	Eukaryotic translation initiation factor 4B	EIF4B	832	tr|F8VX11|F8VX11_HUMAN Eukaryotic translation initiation factor 4B (Fragment) OS=Homo sapiens OX=9606 GN=EIF4B PE=1 SV=1;tr|E7EX17|E7EX17_HUMAN Eukaryotic translation initiation factor 4B OS=Homo sapiens OX=9606 GN=EIF4B PE=1 SV=1;sp|P23588|IF4B_HUMAN Euka
25.6069	25.27	25.0901	NaN	25.5783	NaN	NaN	NaN	26.2958	25.0518	25.6601	26.0155	25.9259	26.1232	NaN			3	3	3	50.7	50.7	50.7	7.9331	0	12.474	658420000	43	25.6618	25.3863	25.6738	25.9312	10	4	2	4	0.535247	-0.287518	-0.677507	P56385	P56385	ATP synthase subunit e, mitochondrial	ATP5I	2317	sp|P56385|ATP5I_HUMAN ATP synthase subunit e, mitochondrial OS=Homo sapiens OX=9606 GN=ATP5ME PE=1 SV=2
25.4579	25.4123	25.4943	NaN	25.7583	NaN	NaN	25.844	NaN	25.7203	NaN	NaN	NaN	NaN	NaN			2	2	2	11.6	11.6	11.6	28.449	0	8.0649	215490000	7	25.6145	25.5307	25.7822	NaN	6	4	2	0	0.109464	-0.251458	-2.05182	Q9NX20;E9PI14	Q9NX20;E9PI14	39S ribosomal protein L16, mitochondrial	MRPL16	3679	sp|Q9NX20|RM16_HUMAN 39S ribosomal protein L16, mitochondrial OS=Homo sapiens OX=9606 GN=MRPL16 PE=1 SV=1;tr|E9PI14|E9PI14_HUMAN 39S ribosomal protein L16, mitochondrial (Fragment) OS=Homo sapiens OX=9606 GN=MRPL16 PE=1 SV=1
25.3876	24.8254	NaN	24.7742	24.8528	NaN	25.0566	25.3117	NaN	NaN	25.0068	24.9825	25.0722	24.9518	NaN			4	4	4	4.8	4.8	4.8	117.15	0	81.15	332310000	26	25.0222	24.96	25.1841	25.0034	10	4	2	4	0.382954	-0.224147	-0.979131	Q9NWH9;H7BXE3;H0YLW7;H0YMW8;H0YNF3;H0YMR6;H0YLE6;H0YL55;H7C3F4;H0YKH2	Q9NWH9;H7BXE3;H0YLW7;H0YMW8;H0YNF3;H0YMR6;H0YLE6;H0YL55;H7C3F4	SAFB-like transcription modulator	SLTM	3672	sp|Q9NWH9|SLTM_HUMAN SAFB-like transcription modulator OS=Homo sapiens OX=9606 GN=SLTM PE=1 SV=2;tr|H7BXE3|H7BXE3_HUMAN SAFB-like transcription modulator (Fragment) OS=Homo sapiens OX=9606 GN=SLTM PE=1 SV=1;tr|H0YLW7|H0YLW7_HUMAN SAFB-like transcription mo
26.9016	27.6061	27.2232	NaN	26.857	NaN	27.5932	27.0581	NaN	NaN	NaN	NaN	NaN	NaN	NaN			11	11	11	33.8	33.8	33.8	63.964	0	60.941	1107000000	29	27.2065	27.147	27.3256	NaN	6	4	2	0	0.592356	-0.178648	-0.581078	Q9BW04	Q9BW04	Specifically androgen-regulated gene protein	SARG	3437	sp|Q9BW04|SARG_HUMAN Specifically androgen-regulated gene protein OS=Homo sapiens OX=9606 GN=SARG PE=1 SV=2
NaN	25.3589	24.9674	25.1527	25.2227	25.373	NaN	25.1826	NaN	NaN	NaN	NaN	NaN	NaN	NaN			4	4	4	15.9	15.9	15.9	31.381	0	22.642	292280000	23	25.2095	25.1754	25.2778	NaN	6	4	2	0	0.491929	-0.10234	-0.755627	Q96FX7;H0Y2Q1	Q96FX7;H0Y2Q1	tRNA (adenine(58)-N(1))-methyltransferase catalytic subunit TRMT61A	TRMT61A	3272	sp|Q96FX7|TRM61_HUMAN tRNA (adenine(58)-N(1))-methyltransferase catalytic subunit TRMT61A OS=Homo sapiens OX=9606 GN=TRMT61A PE=1 SV=1;tr|H0Y2Q1|H0Y2Q1_HUMAN tRNA (adenine(58)-N(1))-methyltransferase (Fragment) OS=Homo sapiens OX=9606 GN=TRMT61A PE=1 SV=1
24.9698	25.8305	25.1094	NaN	25.6111	NaN	25.3565	25.5964	NaN	NaN	NaN	NaN	NaN	NaN	NaN			7	7	7	19.5	19.5	19.5	45.318	0	32.748	412070000	23	25.4123	25.3802	25.4765	NaN	6	4	2	0	0.774664	-0.0962486	-0.306291	Q92665	Q92665	28S ribosomal protein S31, mitochondrial	MRPS31	3186	sp|Q92665|RT31_HUMAN 28S ribosomal protein S31, mitochondrial OS=Homo sapiens OX=9606 GN=MRPS31 PE=1 SV=3
26.0152	25.9232	25.2002	26.8191	NaN	NaN	NaN	26.0778	26.0392	NaN	NaN	NaN	NaN	NaN	NaN			3	3	3	26.5	26.5	26.5	27.015	0	9.6326	320340000	14	26.0124	25.9894	26.0585	NaN	6	4	2	0	0.896199	-0.0690546	-0.138958	A0A087WTZ5;E9PJ81;E9PRQ7;Q04323;E9PS08	A0A087WTZ5;E9PJ81;E9PRQ7;Q04323	UBX domain-containing protein 1	UBXN1	22	tr|A0A087WTZ5|A0A087WTZ5_HUMAN UBX domain-containing protein 1 OS=Homo sapiens OX=9606 GN=UBXN1 PE=1 SV=1;tr|E9PJ81|E9PJ81_HUMAN UBX domain-containing protein 1 (Fragment) OS=Homo sapiens OX=9606 GN=UBXN1 PE=1 SV=1;tr|E9PRQ7|E9PRQ7_HUMAN UBX domain-contain
26.1285	NaN	26.2175	26.1606	26.3855	26.5706	NaN	25.9864	NaN	NaN	26.3528	NaN	NaN	NaN	NaN			2	2	2	20.8	20.8	20.8	14.585	0	9.6067	889480000	22	26.2574	26.223	26.2785	26.3528	7	4	2	1	0.793598	-0.0554872	-0.279668	Q9Y3B4	Q9Y3B4	Splicing factor 3B subunit 6	SF3B6	3885	sp|Q9Y3B4|SF3B6_HUMAN Splicing factor 3B subunit 6 OS=Homo sapiens OX=9606 GN=SF3B6 PE=1 SV=1
25.3081	25.2797	25.6541	NaN	25.8925	NaN	25.4079	NaN	25.5422	NaN	NaN	NaN	NaN	NaN	NaN			3	3	3	12.4	12.4	12.4	38.282	0	7.5595	332650000	14	25.5141	25.5336	25.4751	NaN	6	4	2	0	0.806685	0.0585575	0.261409	Q5JS37;C9J973	Q5JS37	NHL repeat-containing protein 3	NHLRC3	2824	sp|Q5JS37|NHLC3_HUMAN NHL repeat-containing protein 3 OS=Homo sapiens OX=9606 GN=NHLRC3 PE=2 SV=1
24.6498	24.6152	24.4895	NaN	24.4695	NaN	24.5747	24.4113	NaN	NaN	NaN	NaN	NaN	NaN	NaN			7	7	7	10.9	10.9	10.9	113.63	0	95.979	214720000	18	24.535	24.556	24.493	NaN	6	4	2	0	0.494654	0.0629878	0.750565	F8W726;Q14157;Q5VU77;Q5VU79;Q5VU78;Q5VU81;Q5VU80;H0Y5H6;H7C2T8	F8W726;Q14157	Ubiquitin-associated protein 2-like	UBAP2L	994	tr|F8W726|F8W726_HUMAN Ubiquitin-associated protein 2-like OS=Homo sapiens OX=9606 GN=UBAP2L PE=1 SV=2;sp|Q14157|UBP2L_HUMAN Ubiquitin-associated protein 2-like OS=Homo sapiens OX=9606 GN=UBAP2L PE=1 SV=2
26.6238	NaN	25.9101	26.4721	27.3862	26.5037	26.239	NaN	NaN	NaN	NaN	NaN	NaN	NaN	NaN			7	3	3	53.6	27.7	27.7	18.736	0	52.367	677160000	15	26.5225	26.5981	26.3714	NaN	6	4	2	0	0.650407	0.226704	0.489055	Q9Y281;G3V2U0;F8WDN3	Q9Y281	Cofilin-2	CFL2	3849	sp|Q9Y281|COF2_HUMAN Cofilin-2 OS=Homo sapiens OX=9606 GN=CFL2 PE=1 SV=1
NaN	25.1999	25.2173	25.4035	25.5842	NaN	NaN	NaN	25.1294	25.0541	NaN	NaN	NaN	NaN	NaN			5	5	5	19.2	19.2	19.2	33.535	0	23.687	243870000	18	25.2647	25.3512	25.0918	NaN	6	4	2	0	0.131993	0.25946	1.88841	P49406;S4R3W9;S4R455;A0A0A0MRF4	P49406;S4R3W9;S4R455	39S ribosomal protein L19, mitochondrial	MRPL19	2195	sp|P49406|RM19_HUMAN 39S ribosomal protein L19, mitochondrial OS=Homo sapiens OX=9606 GN=MRPL19 PE=1 SV=2;tr|S4R3W9|S4R3W9_HUMAN 39S ribosomal protein L19, mitochondrial (Fragment) OS=Homo sapiens OX=9606 GN=MRPL19 PE=1 SV=1;tr|S4R455|S4R455_HUMAN 39S ribo
24.0899	NaN	24.4567	23.6809	24.3129	NaN	24.3002	NaN	NaN	23.4169	NaN	NaN	NaN	NaN	NaN			2	2	2	8.9	8.9	8.9	31.386	0	8.281	130460000	16	24.0429	24.1351	23.8585	NaN	6	4	2	0	0.497254	0.276571	0.745756	M0QYS5;F5H8D7;P18887;M0QZ96;M0R0D2;M0R1U8	M0QYS5;F5H8D7;P18887;M0QZ96;M0R0D2;M0R1U8	DNA repair protein XRCC1	XRCC1	954	tr|M0QYS5|M0QYS5_HUMAN DNA repair protein XRCC1 (Fragment) OS=Homo sapiens OX=9606 GN=XRCC1 PE=1 SV=1;tr|F5H8D7|F5H8D7_HUMAN DNA repair protein XRCC1 OS=Homo sapiens OX=9606 GN=XRCC1 PE=1 SV=2;sp|P18887|XRCC1_HUMAN DNA repair protein XRCC1 OS=Homo sapiens
NaN	26.121	25.7149	25.8125	26.1409	NaN	25.1153	NaN	26.0226	NaN	25.4529	25.6693	26.1206	25.9968	NaN			5	5	5	25.1	25.1	25.1	34.958	0	26.316	446250000	15	25.8167	25.9474	25.5689	25.8099	10	4	2	4	0.304495	0.378412	1.17688	A0A2R8YEZ4;A0A2R8Y5D3;O15160;A0A2R8YEY5;E7EQB9;D6RDJ3;H0Y723;A0A2R8Y8D6	A0A2R8YEZ4;A0A2R8Y5D3;O15160;A0A2R8YEY5;E7EQB9;D6RDJ3;H0Y723;A0A2R8Y8D6	DNA-directed RNA polymerases I and III subunit RPAC1	POLR1C	314	tr|A0A2R8YEZ4|A0A2R8YEZ4_HUMAN DNA-directed RNA polymerases I and III subunit RPAC1 OS=Homo sapiens OX=9606 GN=POLR1C PE=1 SV=1;tr|A0A2R8Y5D3|A0A2R8Y5D3_HUMAN DNA-directed RNA polymerases I and III subunit RPAC1 OS=Homo sapiens OX=9606 GN=POLR1C PE=1 SV=1;
26.2416	26.3954	26.2099	NaN	27.7925	NaN	25.8435	26.0374	NaN	NaN	NaN	NaN	NaN	NaN	NaN			6	5	5	31	26.3	26.3	23.495	0	112.36	419100000	9	26.42	26.6599	25.9404	NaN	6	4	2	0	0.277353	0.719451	1.25637	P57735	P57735	Ras-related protein Rab-25	RAB25	2324	sp|P57735|RAB25_HUMAN Ras-related protein Rab-25 OS=Homo sapiens OX=9606 GN=RAB25 PE=1 SV=2
27.2604	NaN	NaN	27.6914	27.4412	NaN	28.38	28.121	NaN	NaN	NaN	NaN	NaN	NaN	NaN	+	3NT_Control	4	4	4	4.6	4.6	4.6	141.29	0	7.172	1333300000	18	27.7788	27.4643	28.2505	NaN	5	3	2	0	0.0249058	-0.786198	-4.1825	Q9C0C9;K7ES11;K7EQ12	Q9C0C9;K7ES11	E2/E3 hybrid ubiquitin-protein ligase UBE2O	UBE2O	3478	sp|Q9C0C9|UBE2O_HUMAN (E3-independent) E2 ubiquitin-conjugating enzyme OS=Homo sapiens OX=9606 GN=UBE2O PE=1 SV=3;tr|K7ES11|K7ES11_HUMAN (E3-independent) E2 ubiquitin-conjugating enzyme (Fragment) OS=Homo sapiens OX=9606 GN=UBE2O PE=1 SV=1
23.3033	NaN	NaN	25.1582	23.7095	NaN	25.3368	24.3207	NaN	NaN	NaN	NaN	NaN	25.2284	NaN			4	4	4	9.9	9.9	9.9	54.089	0	10.974	238220000	16	24.5095	24.057	24.8288	25.2284	6	3	2	1	0.415791	-0.771777	-0.941761	Q96I59;H0YEL9;E9PRK2	Q96I59;H0YEL9;E9PRK2	Probable asparagine--tRNA ligase, mitochondrial	NARS2	3293	sp|Q96I59|SYNM_HUMAN Probable asparagine--tRNA ligase, mitochondrial OS=Homo sapiens OX=9606 GN=NARS2 PE=1 SV=3;tr|H0YEL9|H0YEL9_HUMAN Probable asparagine--tRNA ligase, mitochondrial (Fragment) OS=Homo sapiens OX=9606 GN=NARS2 PE=1 SV=1;tr|E9PRK2|E9PRK2_HU
23.2487	25.4156	NaN	23.7413	NaN	NaN	NaN	25.5386	NaN	24.1084	NaN	NaN	NaN	NaN	NaN			2	2	2	15.1	15.1	15.1	19.738	0.00055294	3.2936	105970000	7	24.4105	24.1352	24.8235	NaN	5	3	2	0	0.540897	-0.688272	-0.687963	P41208	P41208	Centrin-2	CETN2	2114	sp|P41208|CETN2_HUMAN Centrin-2 OS=Homo sapiens OX=9606 GN=CETN2 PE=1 SV=1
NaN	23.5152	24.1684	24.1241	NaN	NaN	NaN	24.2453	NaN	24.3532	24.5359	NaN	NaN	NaN	NaN			2	2	2	7.7	7.7	7.7	32.62	0.00029958	4.6018	130010000	13	24.157	23.9359	24.2992	24.5359	6	3	2	1	0.278217	-0.363313	-1.32103	Q14249	Q14249	Endonuclease G, mitochondrial	ENDOG	2656	sp|Q14249|NUCG_HUMAN Endonuclease G, mitochondrial OS=Homo sapiens OX=9606 GN=ENDOG PE=1 SV=4
25.0216	25.0234	24.6535	NaN	NaN	25.1101	NaN	25.3217	NaN	NaN	NaN	NaN	25.0972	24.8957	NaN			5	3	3	20.2	15.3	15.3	35.08	0	12.258	293750000	17	25.0176	24.8995	25.2159	24.9964	7	3	2	2	0.172267	-0.316417	-1.78491	P60510;H3BTA2;H3BV22;I3L4X0;H3BPN5;H3BVE3	P60510;H3BTA2;H3BV22	Serine/threonine-protein phosphatase 4 catalytic subunit;Serine/threonine-protein phosphatase	PPP4C	2332	sp|P60510|PP4C_HUMAN Serine/threonine-protein phosphatase 4 catalytic subunit OS=Homo sapiens OX=9606 GN=PPP4C PE=1 SV=1;tr|H3BTA2|H3BTA2_HUMAN Serine/threonine-protein phosphatase (Fragment) OS=Homo sapiens OX=9606 GN=PPP4C PE=1 SV=1;tr|H3BV22|H3BV22_HUMA
23.9132	NaN	25.676	NaN	24.8574	NaN	NaN	NaN	23.6584	26.3834	NaN	25.6594	25.735	25.8489	NaN			3	3	3	10	10	10	59.38	0	12.514	397950000	16	25.2165	24.8155	25.0209	25.7477	8	3	2	3	0.876021	-0.205341	-0.169732	Q8WXA9	Q8WXA9	Splicing regulatory glutamine/lysine-rich protein 1	SREK1	3162	sp|Q8WXA9|SREK1_HUMAN Splicing regulatory glutamine/lysine-rich protein 1 OS=Homo sapiens OX=9606 GN=SREK1 PE=1 SV=1
24.9771	24.7759	NaN	NaN	25.6091	NaN	25.4134	25.2325	NaN	NaN	NaN	NaN	NaN	NaN	NaN			8	8	8	11.4	11.4	11.4	123.56	0	24.032	260890000	16	25.2016	25.1207	25.3229	NaN	5	3	2	0	0.584335	-0.202272	-0.611078	Q9H2P0;A0A669KBJ7;A0A2R8Y6X0;A0A2R8YCL6	Q9H2P0;A0A669KBJ7;A0A2R8Y6X0	Activity-dependent neuroprotector homeobox protein	ADNP	3510	sp|Q9H2P0|ADNP_HUMAN Activity-dependent neuroprotector homeobox protein OS=Homo sapiens OX=9606 GN=ADNP PE=1 SV=1;tr|A0A669KBJ7|A0A669KBJ7_HUMAN Activity-dependent neuroprotector homeobox protein OS=Homo sapiens OX=9606 GN=ADNP PE=1 SV=1;tr|A0A2R8Y6X0|A0A2
25.3393	25.3713	25.1575	NaN	NaN	25.133	25.652	NaN	NaN	NaN	NaN	25.8416	25.726	NaN	NaN			18	5	3	22.6	10.7	8	88.381	0	9.7335	333530000	10	25.4601	25.2894	25.3925	25.7838	7	3	2	2	0.659447	-0.103137	-0.487279	A0A0B4J269;Q13509;G3V2A3;CON__ENSEMBL:ENSBTAP00000025008;Q9H4B7;G3V542;G3V5W4;G3V2R8;G3V3R4;G3V2N6	A0A0B4J269;Q13509	Tubulin beta-3 chain	TUBB3	176	tr|A0A0B4J269|A0A0B4J269_HUMAN G_PROTEIN_RECEP_F1_2 domain-containing protein OS=Homo sapiens OX=9606 PE=1 SV=1;sp|Q13509|TBB3_HUMAN Tubulin beta-3 chain OS=Homo sapiens OX=9606 GN=TUBB3 PE=1 SV=2
24.9134	24.5059	24.5233	NaN	NaN	NaN	NaN	NaN	24.5392	24.8991	NaN	NaN	NaN	NaN	NaN			10	4	4	13.2	5.8	5.8	102.53	0	6.6553	120000000	10	24.6762	24.6475	24.7191	NaN	5	3	2	0	0.764135	-0.0715793	-0.328489	A0A669KAX4;K4DI93;Q13620	A0A669KAX4;K4DI93;Q13620	Cullin-4B	CUL4B	413	tr|A0A669KAX4|A0A669KAX4_HUMAN Cullin-4B OS=Homo sapiens OX=9606 GN=CUL4B PE=1 SV=1;tr|K4DI93|K4DI93_HUMAN Cullin 4B, isoform CRA_e OS=Homo sapiens OX=9606 GN=CUL4B PE=1 SV=1;sp|Q13620|CUL4B_HUMAN Cullin-4B OS=Homo sapiens OX=9606 GN=CUL4B PE=1 SV=4
25.3019	25.3127	25.3465	NaN	NaN	NaN	25.2983	NaN	25.3756	NaN	NaN	NaN	NaN	NaN	NaN			3	3	3	10.3	10.3	10.3	47.305	0	6.4897	300730000	13	25.327	25.3204	25.3369	NaN	5	3	2	0	0.65617	-0.0165564	-0.492479	Q99611	Q99611	Selenide, water dikinase 2	SEPHS2	3361	sp|Q99611|SPS2_HUMAN Selenide, water dikinase 2 OS=Homo sapiens OX=9606 GN=SEPHS2 PE=1 SV=3
23.6173	25.5361	24.1862	NaN	NaN	NaN	24.5912	NaN	NaN	24.2862	NaN	NaN	NaN	NaN	NaN			6	6	6	23.1	23.1	23.1	39.681	0	28.544	191630000	16	24.4434	24.4465	24.4387	NaN	5	3	2	0	0.992246	0.00784111	0.010549	P35249;C9JZI1;C9J8M3;C9JTT7;C9JXZ7;C9JGY5;F8WE44;H7C1P0	P35249;C9JZI1;C9J8M3;C9JTT7	Replication factor C subunit 4	RFC4	2055	sp|P35249|RFC4_HUMAN Replication factor C subunit 4 OS=Homo sapiens OX=9606 GN=RFC4 PE=1 SV=2;tr|C9JZI1|C9JZI1_HUMAN Replication factor C subunit 4 OS=Homo sapiens OX=9606 GN=RFC4 PE=1 SV=1;tr|C9J8M3|C9J8M3_HUMAN Replication factor C subunit 4 (Fragment) O
25.5804	26.466	NaN	NaN	27.3948	NaN	26.5369	26.2401	NaN	NaN	26.2572	NaN	26.2079	NaN	NaN			4	4	4	26.8	26.8	26.8	15.425	0	34.261	1172300000	44	26.3833	26.4804	26.3885	26.2325	7	3	2	2	0.901765	0.0919377	0.134168	Q9Y3E0;G3V1U5;F5H6U7;F5GWD8;F5GXH6	Q9Y3E0;G3V1U5;F5H6U7	Vesicle transport protein GOT1B	GOLT1B	3892	sp|Q9Y3E0|GOT1B_HUMAN Vesicle transport protein GOT1B OS=Homo sapiens OX=9606 GN=GOLT1B PE=1 SV=1;tr|G3V1U5|G3V1U5_HUMAN Golgi transport 1 homolog B (S. cerevisiae), isoform CRA_c OS=Homo sapiens OX=9606 GN=GOLT1B PE=1 SV=1;tr|F5H6U7|F5H6U7_HUMAN Vesicle t
25.465	25.3755	25.1693	NaN	NaN	NaN	25.5734	NaN	NaN	24.8797	NaN	NaN	NaN	NaN	NaN			3	3	3	12.2	12.2	12.2	52.667	0	25.315	240420000	19	25.2926	25.3366	25.2265	NaN	5	3	2	0	0.72248	0.110085	0.390146	P49768;G3V3Z0;G3V499;G3V2G7;E7ES96;G3V5B1;G3V3P0;G3V449;G3V2B1;G3V519;G3V4M0;H0YM52;G3V4P4	P49768;G3V3Z0;G3V499;G3V2G7;E7ES96	Presenilin-1;Presenilin-1 NTF subunit;Presenilin-1 CTF subunit;Presenilin-1 CTF12;Presenilin	PSEN1	2210	sp|P49768|PSN1_HUMAN Presenilin-1 OS=Homo sapiens OX=9606 GN=PSEN1 PE=1 SV=1;tr|G3V3Z0|G3V3Z0_HUMAN Presenilin-1 CTF12 (Fragment) OS=Homo sapiens OX=9606 GN=PSEN1 PE=1 SV=1;tr|G3V499|G3V499_HUMAN Presenilin-1 CTF12 (Fragment) OS=Homo sapiens OX=9606 GN=PSE
26.2413	26.1603	NaN	NaN	25.9904	NaN	25.8718	NaN	26.1541	NaN	NaN	NaN	NaN	NaN	NaN			41	2	0	65.8	5.5	0	55.762	0	64.152	515320000	15	26.0836	26.1307	26.013	NaN	5	3	2	0	0.468164	0.1177	0.828464	Q5TCI8	Q5TCI8		LMNA	2862	tr|Q5TCI8|Q5TCI8_HUMAN Prelamin-A/C OS=Homo sapiens OX=9606 GN=LMNA PE=1 SV=1
25.5357	NaN	25.2985	25.8648	NaN	NaN	25.843	NaN	NaN	25.0441	NaN	NaN	NaN	NaN	NaN			7	7	7	20.5	20.5	20.5	56.928	0	22.156	392370000	18	25.5172	25.5664	25.4436	NaN	5	3	2	0	0.75905	0.122771	0.335924	Q9NP61;B0QYV8;H0Y6A0;B0QYV9	Q9NP61	ADP-ribosylation factor GTPase-activating protein 3	ARFGAP3	3593	sp|Q9NP61|ARFG3_HUMAN ADP-ribosylation factor GTPase-activating protein 3 OS=Homo sapiens OX=9606 GN=ARFGAP3 PE=1 SV=1
NaN	26.3236	NaN	26.2151	26.2011	26.0624	26.1601	NaN	NaN	NaN	26.413	26.8086	26.2508	26.3536	NaN			4	4	4	15.9	15.9	15.9	48.842	0	19.034	593900000	26	26.3098	26.2466	26.1112	26.4565	9	3	2	4	0.116278	0.135355	2.18978	Q9NWU1;C9J2G3;C9JQQ2;F8VNS3	Q9NWU1;C9J2G3;C9JQQ2	3-oxoacyl-[acyl-carrier-protein] synthase, mitochondrial	OXSM	3674	sp|Q9NWU1|OXSM_HUMAN 3-oxoacyl-[acyl-carrier-protein] synthase, mitochondrial OS=Homo sapiens OX=9606 GN=OXSM PE=1 SV=1;tr|C9J2G3|C9J2G3_HUMAN 3-oxoacyl-[acyl-carrier-protein] synthase, mitochondrial (Fragment) OS=Homo sapiens OX=9606 GN=OXSM PE=1 SV=1;tr|
24.811	24.3744	NaN	NaN	24.2622	NaN	NaN	NaN	24.903	23.7589	NaN	25.0317	25.1391	NaN	NaN			3	3	3	43.2	43.2	43.2	9.1632	0	10.259	240700000	10	24.6115	24.4825	24.3309	25.0854	7	3	2	2	0.771975	0.15157	0.317071	E9PLG8;E9PLV6;E9PPZ9;O43292;E9PM11	E9PLG8;E9PLV6;E9PPZ9;O43292	Glycosylphosphatidylinositol anchor attachment 1 protein	GPAA1	887	tr|E9PLG8|E9PLG8_HUMAN Glycosylphosphatidylinositol anchor attachment 1 protein (Fragment) OS=Homo sapiens OX=9606 GN=GPAA1 PE=1 SV=1;tr|E9PLV6|E9PLV6_HUMAN Glycosylphosphatidylinositol anchor attachment 1 protein OS=Homo sapiens OX=9606 GN=GPAA1 PE=1 SV=1
NaN	24.8292	NaN	24.4096	25.5268	NaN	NaN	25.2343	24.2825	NaN	NaN	NaN	NaN	NaN	NaN			2	2	2	40.4	40.4	40.4	10.666	0	5.5418	139680000	12	24.8565	24.9219	24.7584	NaN	5	3	2	0	0.785725	0.163507	0.29717	Q15651;A0A087WZE9;P05204	Q15651;A0A087WZE9;P05204	High mobility group nucleosome-binding domain-containing protein 3;Non-histone chromosomal protein HMG-17	HMGN3;HMGN2	2736	sp|Q15651|HMGN3_HUMAN High mobility group nucleosome-binding domain-containing protein 3 OS=Homo sapiens OX=9606 GN=HMGN3 PE=1 SV=2;tr|A0A087WZE9|A0A087WZE9_HUMAN High mobility group nucleosome-binding domain-containing protein 3 OS=Homo sapiens OX=9606 GN
23.8207	NaN	23.8439	24.1527	NaN	NaN	23.4619	NaN	NaN	24.0818	NaN	NaN	NaN	24.3139	NaN			3	3	3	27.1	27.1	27.1	19.208	0	9.5258	101210000	13	23.9458	23.9391	23.7718	24.3139	6	3	2	1	0.578418	0.167239	0.621294	O43447;H0YEL5;C9JQD4	O43447;H0YEL5;C9JQD4	Peptidyl-prolyl cis-trans isomerase H;Peptidyl-prolyl cis-trans isomerase	PPIH	1403	sp|O43447|PPIH_HUMAN Peptidyl-prolyl cis-trans isomerase H OS=Homo sapiens OX=9606 GN=PPIH PE=1 SV=1;tr|H0YEL5|H0YEL5_HUMAN Peptidyl-prolyl cis-trans isomerase (Fragment) OS=Homo sapiens OX=9606 GN=PPIH PE=1 SV=1;tr|C9JQD4|C9JQD4_HUMAN Peptidyl-prolyl cis-
26.0612	25.7326	25.2755	NaN	NaN	NaN	25.4472	NaN	NaN	25.5341	NaN	NaN	NaN	NaN	NaN			2	2	2	25.7	25.7	25.7	14.874	0	72.452	297080000	11	25.6101	25.6898	25.4907	NaN	5	3	2	0	0.549188	0.199123	0.672933	O95295	O95295	SNARE-associated protein Snapin	SNAPIN	1562	sp|O95295|SNAPN_HUMAN SNARE-associated protein Snapin OS=Homo sapiens OX=9606 GN=SNAPIN PE=1 SV=1
NaN	NaN	25.5712	24.6822	25.8568	NaN	NaN	25.2759	NaN	24.9435	NaN	NaN	NaN	NaN	NaN			5	5	5	18.6	18.6	18.6	47.776	0	12.019	323330000	9	25.2659	25.37	25.1097	NaN	5	3	2	0	0.620393	0.260382	0.550374	Q8IYS1	Q8IYS1	Peptidase M20 domain-containing protein 2	PM20D2	3028	sp|Q8IYS1|P20D2_HUMAN Peptidase M20 domain-containing protein 2 OS=Homo sapiens OX=9606 GN=PM20D2 PE=1 SV=2
24.9254	25.5385	24.7366	NaN	NaN	NaN	24.6786	NaN	NaN	24.8091	NaN	NaN	NaN	NaN	NaN			2	2	2	33.8	33.8	33.8	8.7247	0	18.751	515110000	16	24.9376	25.0668	24.7438	NaN	5	3	2	0	0.382298	0.322972	1.02128	K7ENZ6;K7EMF4;K7ELM8;K7EJ34;K7ENF4;Q86VR2	K7ENZ6;K7EMF4;K7ELM8;K7EJ34;K7ENF4;Q86VR2	Protein FAM134C	FAM134C	1229	tr|K7ENZ6|K7ENZ6_HUMAN Reticulophagy regulator 3 OS=Homo sapiens OX=9606 GN=RETREG3 PE=1 SV=1;tr|K7EMF4|K7EMF4_HUMAN Reticulophagy regulator 3 OS=Homo sapiens OX=9606 GN=RETREG3 PE=1 SV=1;tr|K7ELM8|K7ELM8_HUMAN Reticulophagy regulator 3 OS=Homo sapiens OX=
25.4001	25.8236	NaN	NaN	24.0694	NaN	24.94	24.4756	NaN	NaN	NaN	NaN	NaN	NaN	NaN			3	3	3	28.3	28.3	28.3	19.76	0	8.116	260670000	11	24.9417	25.0977	24.7078	NaN	5	3	2	0	0.618227	0.389916	0.55395	Q96NT0;B8ZZ99;F8WCZ3	Q96NT0;B8ZZ99;F8WCZ3	Coiled-coil domain-containing protein 115	CCDC115	3312	sp|Q96NT0|CC115_HUMAN Coiled-coil domain-containing protein 115 OS=Homo sapiens OX=9606 GN=CCDC115 PE=1 SV=1;tr|B8ZZ99|B8ZZ99_HUMAN Coiled-coil domain-containing protein 115 OS=Homo sapiens OX=9606 GN=CCDC115 PE=1 SV=1;tr|F8WCZ3|F8WCZ3_HUMAN Coiled-coil do
23.9577	24.2313	23.5221	NaN	NaN	NaN	NaN	24.6264	NaN	22.279	NaN	NaN	NaN	NaN	NaN			6	6	6	8.8	8.8	8.8	104.74	0	19.414	105370000	22	23.7233	23.9037	23.4527	NaN	5	3	2	0	0.655735	0.451036	0.493169	P43246;A0A2R8YFH0;E9PHA6;A0A2R8Y6P0;A0A2R8YG02;A0A2R8Y7S8;A0A2R8Y713	P43246;A0A2R8YFH0;E9PHA6;A0A2R8Y6P0;A0A2R8YG02;A0A2R8Y7S8	DNA mismatch repair protein Msh2	MSH2	2135	sp|P43246|MSH2_HUMAN DNA mismatch repair protein Msh2 OS=Homo sapiens OX=9606 GN=MSH2 PE=1 SV=1;tr|A0A2R8YFH0|A0A2R8YFH0_HUMAN DNA mismatch repair protein OS=Homo sapiens OX=9606 GN=MSH2 PE=1 SV=1;tr|E9PHA6|E9PHA6_HUMAN DNA mismatch repair protein OS=Homo
24.9723	NaN	24.2364	NaN	24.1887	23.514	24.4057	NaN	NaN	NaN	NaN	NaN	NaN	NaN	NaN			2	2	2	5.8	5.8	5.8	57.19	0	21.613	154920000	16	24.2634	24.4658	23.9598	NaN	5	3	2	0	0.357528	0.505944	1.08447	H3BR82;H3BMF4;Q9H2V7;H3BT44;H3BPQ9	H3BR82;H3BMF4;Q9H2V7;H3BT44;H3BPQ9	Protein spinster homolog 1	SPNS1	1098	tr|H3BR82|H3BR82_HUMAN Protein spinster homolog 1 (Fragment) OS=Homo sapiens OX=9606 GN=SPNS1 PE=1 SV=1;tr|H3BMF4|H3BMF4_HUMAN Protein spinster homolog 1 OS=Homo sapiens OX=9606 GN=SPNS1 PE=1 SV=1;sp|Q9H2V7|SPNS1_HUMAN Protein spinster homolog 1 OS=Homo sa
NaN	24.1472	24.1722	NaN	24.681	NaN	NaN	NaN	23.7687	23.7515	NaN	NaN	NaN	NaN	NaN			5	5	5	19.4	19.4	19.4	40.146	0	26.264	124100000	8	24.1041	24.3335	23.7601	NaN	5	3	2	0	0.0837685	0.573327	2.55238	Q9UGM6	Q9UGM6	Tryptophan--tRNA ligase, mitochondrial	WARS2	3751	sp|Q9UGM6|SYWM_HUMAN Tryptophan--tRNA ligase, mitochondrial OS=Homo sapiens OX=9606 GN=WARS2 PE=1 SV=1
25.2259	24.7791	27.0548	NaN	NaN	NaN	NaN	25.2732	NaN	24.7479	NaN	NaN	NaN	NaN	NaN			3	2	2	7.5	6.1	6.1	61.515	0	18.592	192260000	13	25.4162	25.6866	25.0105	NaN	5	3	2	0	0.515569	0.676072	0.735027	R9WNI0;A8MQB8;G3V0J0;Q06787;A0A087WWR6;Q8IXW7;A0A087WXI3;P51116;A0A087WY29	R9WNI0;A8MQB8;G3V0J0;Q06787;A0A087WWR6;Q8IXW7;A0A087WXI3;P51116	Fragile X mental retardation protein 1;Fragile X mental retardation syndrome-related protein 2	FMR1;FXR2	461	tr|R9WNI0|R9WNI0_HUMAN Synaptic functional regulator FMR1 OS=Homo sapiens OX=9606 GN=FMR1 PE=1 SV=1;tr|A8MQB8|A8MQB8_HUMAN Synaptic functional regulator FMR1 OS=Homo sapiens OX=9606 GN=FMR1 PE=1 SV=1;tr|G3V0J0|G3V0J0_HUMAN Synaptic functional regulator FMR
NaN	NaN	NaN	25.7679	25.561	NaN	26.0166	25.9306	NaN	NaN	26.6023	26.0039	26.3949	26.2483	NaN			5	5	5	19.6	19.6	19.6	35.892	0	12.794	395290000	18	26.0657	25.6645	25.9736	26.3124	8	2	2	4	0.110039	-0.309157	-2.75986	Q13630;E9PLH9;E9PP14;A0A0J9YX13;E9PKL9;E9PP60;H0YE90;H0YCP7	Q13630;E9PLH9;E9PP14;A0A0J9YX13;E9PKL9	GDP-L-fucose synthase	TSTA3	2626	sp|Q13630|FCL_HUMAN GDP-L-fucose synthase OS=Homo sapiens OX=9606 GN=TSTA3 PE=1 SV=1;tr|E9PLH9|E9PLH9_HUMAN GDP-L-fucose synthase (Fragment) OS=Homo sapiens OX=9606 GN=TSTA3 PE=1 SV=8;tr|E9PP14|E9PP14_HUMAN GDP-L-fucose synthase (Fragment) OS=Homo sapiens
25.6686	NaN	NaN	NaN	26.1994	26.8586	NaN	NaN	NaN	25.1047	26.2341	26.5826	26.548	NaN	NaN			3	3	3	10	10	10	42.316	0	5.2774	388510000	21	26.1709	25.934	25.9817	26.4549	7	2	2	3	0.963246	-0.047657	-0.0520136	Q5T760;Q05519;S4R3C4;B4DWT1;Q5T757	Q5T760;Q05519	Serine/arginine-rich splicing factor 11	SRSF11	2510	tr|Q5T760|Q5T760_HUMAN Serine/arginine-rich-splicing factor 11 (Fragment) OS=Homo sapiens OX=9606 GN=SRSF11 PE=1 SV=1;sp|Q05519|SRS11_HUMAN Serine/arginine-rich splicing factor 11 OS=Homo sapiens OX=9606 GN=SRSF11 PE=1 SV=1
24.2027	25.6351	NaN	NaN	NaN	25.3174	24.2241	NaN	NaN	NaN	NaN	25.2328	26.6882	26.0286	NaN			4	4	4	5.4	5.4	5.4	122.09	0	17.474	216300000	20	25.3327	24.9189	24.7708	25.9832	7	2	2	3	0.884515	0.148136	0.16442	C9JME2;Q9Y4F1;H0Y783;M0QXT1;M0QYB0;A0A1B0GV68	C9JME2;Q9Y4F1;H0Y783;M0QXT1	FERM, RhoGEF and pleckstrin domain-containing protein 1	FARP1	620	tr|C9JME2|C9JME2_HUMAN FERM, ARHGEF and pleckstrin domain-containing protein 1 OS=Homo sapiens OX=9606 GN=FARP1 PE=1 SV=2;sp|Q9Y4F1|FARP1_HUMAN FERM, ARHGEF and pleckstrin domain-containing protein 1 OS=Homo sapiens OX=9606 GN=FARP1 PE=1 SV=1;tr|H0Y783|H0Y
NaN	NaN	NaN	24.4361	NaN	26.3418	25.0514	NaN	NaN	NaN	26.1515	26.3378	26.1072	26.5366	NaN			4	3	3	18.1	14.8	14.8	37.206	0	25.701	229530000	22	25.8517	24.4361	25.6966	26.2833	7	1	2	4	1	-1.26053	0	O95154	O95154	Aflatoxin B1 aldehyde reductase member 3	AKR7A3	1554	sp|O95154|ARK73_HUMAN Aflatoxin B1 aldehyde reductase member 3 OS=Homo sapiens OX=9606 GN=AKR7A3 PE=1 SV=2
24.2705	NaN	NaN	NaN	NaN	26.0609	NaN	NaN	24.755	NaN	26.3708	26.8895	27.8987	27.0488	NaN			10	10	10	48.3	48.3	48.3	22.611	0	33.06	751600000	36	26.1849	24.2705	25.4079	27.052	7	1	2	4	1	-1.13741	0	Q01995;H0YCU9;E9PJ32	Q01995;H0YCU9;E9PJ32	Transgelin	TAGLN	2489	sp|Q01995|TAGL_HUMAN Transgelin OS=Homo sapiens OX=9606 GN=TAGLN PE=1 SV=4;tr|H0YCU9|H0YCU9_HUMAN Transgelin (Fragment) OS=Homo sapiens OX=9606 GN=TAGLN PE=1 SV=1;tr|E9PJ32|E9PJ32_HUMAN Transgelin (Fragment) OS=Homo sapiens OX=9606 GN=TAGLN PE=1 SV=1
24.7679	NaN	NaN	NaN	NaN	27.1724	NaN	NaN	NaN	24.323	25.4913	26.5392	26.8075	27.5617	NaN			3	3	3	45.7	45.7	45.7	10.546	0	32.504	378300000	23	26.0947	24.7679	25.7477	26.5999	7	1	2	4	1	-0.979779	0	P23297;Q5T7Y6;Q5T7Y5;Q5T7Y4	P23297;Q5T7Y6	Protein S100-A1;Protein S100	S100A1	1929	sp|P23297|S10A1_HUMAN Protein S100-A1 OS=Homo sapiens OX=9606 GN=S100A1 PE=1 SV=2;tr|Q5T7Y6|Q5T7Y6_HUMAN Protein S100 OS=Homo sapiens OX=9606 GN=S100A1 PE=1 SV=1
25.6766	NaN	NaN	NaN	NaN	27.3664	NaN	NaN	NaN	25.5164	27.0188	26.9563	27.327	26.8219	NaN			7	7	7	26.2	26.2	26.2	42.966	0	40.175	685930000	22	26.669	25.6766	26.4414	27.031	7	1	2	4	1	-0.764771	0	P54687;F5H2F2;A0A087WYF2	P54687;F5H2F2	Branched-chain-amino-acid aminotransferase, cytosolic	BCAT1	2288	sp|P54687|BCAT1_HUMAN Branched-chain-amino-acid aminotransferase, cytosolic OS=Homo sapiens OX=9606 GN=BCAT1 PE=1 SV=3;tr|F5H2F2|F5H2F2_HUMAN Branched-chain-amino-acid aminotransferase, cytosolic (Fragment) OS=Homo sapiens OX=9606 GN=BCAT1 PE=1 SV=1
NaN	26.3345	NaN	NaN	NaN	27.8946	NaN	NaN	26.063	NaN	29.0364	26.9776	27.5254	27.1135	NaN			6	6	6	31.9	31.9	31.9	38.298	0	29.642	558340000	15	27.2779	26.3345	26.9788	27.6632	7	1	2	4	1	-0.644237	0	P02749;J3QRN2;J3QLI0;J3KS17	P02749;J3QRN2;J3QLI0	Beta-2-glycoprotein 1	APOH	1639	sp|P02749|APOH_HUMAN Beta-2-glycoprotein 1 OS=Homo sapiens OX=9606 GN=APOH PE=1 SV=3;tr|J3QRN2|J3QRN2_HUMAN Beta-2-glycoprotein 1 (Fragment) OS=Homo sapiens OX=9606 GN=APOH PE=1 SV=1;tr|J3QLI0|J3QLI0_HUMAN Beta-2-glycoprotein 1 (Fragment) OS=Homo sapiens O
24.5324	NaN	NaN	NaN	NaN	NaN	25.0341	NaN	NaN	25.124	25.1133	25.229	NaN	25.0265	NaN			3	3	3	8.3	8.3	8.3	64.217	0	12.417	272250000	10	25.0099	24.5324	25.079	25.1229	6	1	2	3	1	-0.546577	0	E9PRW4;A0A024R5I4;O94956;A0A0A0MTF1;H0YE11;E9PI53	E9PRW4;A0A024R5I4;O94956;A0A0A0MTF1	Solute carrier organic anion transporter family member 2B1	SLCO2B1	3	tr|E9PRW4|E9PRW4_HUMAN Solute carrier organic anion transporter family member OS=Homo sapiens OX=9606 GN=SLCO2B1 PE=1 SV=2;tr|A0A024R5I4|A0A024R5I4_HUMAN Solute carrier organic anion transporter family member OS=Homo sapiens OX=9606 GN=SLCO2B1 PE=1 SV=1;sp
24.9474	NaN	NaN	NaN	NaN	NaN	24.0327	NaN	NaN	24.5127	NaN	24.7216	25.4078	24.8715	NaN			6	6	6	33.6	33.6	33.6	32.357	0	18.347	253490000	20	24.7489	24.9474	24.2727	25.0003	6	1	2	3	1	0.674699	0	B4E0K5;Q16539;E7EX54;B5TY33;H7C4E2	B4E0K5;Q16539	Mitogen-activated protein kinase 14	MAPK14	529	tr|B4E0K5|B4E0K5_HUMAN Mitogen-activated protein kinase OS=Homo sapiens OX=9606 GN=MAPK14 PE=1 SV=1;sp|Q16539|MK14_HUMAN Mitogen-activated protein kinase 14 OS=Homo sapiens OX=9606 GN=MAPK14 PE=1 SV=3
NaN	NaN	NaN	NaN	NaN	26.0353	NaN	NaN	NaN	24.965	26.1415	25.8593	25.5704	NaN	NaN			5	5	5	5.3	5.3	5.3	152.93	0	21.439	201580000	10	25.7143	NaN	25.5002	25.857	5	0	2	3	1	NaN	0	O75976;J3QRJ9	O75976	Carboxypeptidase D	CPD	1527	sp|O75976|CBPD_HUMAN Carboxypeptidase D OS=Homo sapiens OX=9606 GN=CPD PE=1 SV=2
NaN	NaN	NaN	NaN	NaN	27.3523	NaN	NaN	25.7871	NaN	27.4967	26.7019	27.0903	27.183	NaN			5	5	5	23.1	23.1	23.1	36.842	0	36.226	1030300000	29	26.9352	NaN	26.5697	27.118	6	0	2	4	1	NaN	0	P09467;A0A3B3IUC7;Q5VZC3	P09467;A0A3B3IUC7	Fructose-1,6-bisphosphatase 1	FBP1	1730	sp|P09467|F16P1_HUMAN Fructose-1,6-bisphosphatase 1 OS=Homo sapiens OX=9606 GN=FBP1 PE=1 SV=5;tr|A0A3B3IUC7|A0A3B3IUC7_HUMAN Fructose-bisphosphatase OS=Homo sapiens OX=9606 GN=FBP1 PE=1 SV=1
NaN	NaN	NaN	NaN	NaN	25.9738	24.6844	NaN	NaN	NaN	25.512	NaN	25.4219	25.5608	NaN			4	4	4	7.8	7.8	7.8	65.471	0	8.0876	178420000	8	25.4306	NaN	25.3291	25.4983	5	0	2	3	1	NaN	0	Q8NHP8	Q8NHP8	Putative phospholipase B-like 2;Putative phospholipase B-like 2 32 kDa form;Putative phospholipase B-like 2 45 kDa form	PLBD2	3106	sp|Q8NHP8|PLBL2_HUMAN Putative phospholipase B-like 2 OS=Homo sapiens OX=9606 GN=PLBD2 PE=1 SV=2
NaN	NaN	NaN	NaN	NaN	26.0091	NaN	NaN	NaN	25.5264	NaN	26.2373	26.1378	25.7971	NaN			3	3	3	11.2	11.2	11.2	57.224	0	9.52	486340000	9	25.9416	NaN	25.7678	26.0574	5	0	2	3	1	NaN	0	Q8WUA2	Q8WUA2	Peptidyl-prolyl cis-trans isomerase-like 4	PPIL4	3141	sp|Q8WUA2|PPIL4_HUMAN Peptidyl-prolyl cis-trans isomerase-like 4 OS=Homo sapiens OX=9606 GN=PPIL4 PE=1 SV=1
25.3116	24.3261	24.8526	24.6177	24.5116	NaN	25.2036	NaN	25.2707	25.4258	NaN	NaN	NaN	NaN	NaN	+	3NT_Control	7	7	7	8.4	8.4	8.4	120.97	0	26.144	458880000	23	24.94	24.7239	25.3	NaN	8	5	3	0	0.0471927	-0.576129	-2.48952	Q03701;C9J9W7	Q03701	CCAAT/enhancer-binding protein zeta	CEBPZ	2503	sp|Q03701|CEBPZ_HUMAN CCAAT/enhancer-binding protein zeta OS=Homo sapiens OX=9606 GN=CEBPZ PE=1 SV=3
25.4153	25.9958	25.417	25.6153	24.8606	NaN	26.9527	25.6464	26.3311	NaN	NaN	NaN	25.9106	NaN	NaN			7	6	6	22.8	20.1	20.1	54.099	0	23.499	569400000	15	25.7939	25.4608	26.3101	25.9106	9	5	3	1	0.0607362	-0.84928	-2.30436	O43237;J3KRI4;B4E2E0;J3KRZ2;H3BUM4	O43237	Cytoplasmic dynein 1 light intermediate chain 2	DYNC1LI2	1392	sp|O43237|DC1L2_HUMAN Cytoplasmic dynein 1 light intermediate chain 2 OS=Homo sapiens OX=9606 GN=DYNC1LI2 PE=1 SV=1
26.0277	26.7249	26.3099	26.7405	26.3351	NaN	27.7486	27.2518	NaN	26.421	NaN	NaN	NaN	NaN	NaN			2	2	2	26.2	26.2	26.2	11.758	0	21.581	566030000	31	26.6949	26.4276	27.1404	NaN	8	5	3	0	0.0779733	-0.712826	-2.12287	B8ZZQ6;P06454;B8ZZA1;B8ZZW7;H7C2N1	B8ZZQ6;P06454;B8ZZA1;B8ZZW7;H7C2N1	Prothymosin alpha;Prothymosin alpha, N-terminally processed;Thymosin alpha-1	PTMA	569	tr|B8ZZQ6|B8ZZQ6_HUMAN Prothymosin alpha OS=Homo sapiens OX=9606 GN=PTMA PE=1 SV=1;sp|P06454|PTMA_HUMAN Prothymosin alpha OS=Homo sapiens OX=9606 GN=PTMA PE=1 SV=2;tr|B8ZZA1|B8ZZA1_HUMAN Prothymosin alpha OS=Homo sapiens OX=9606 GN=PTMA PE=1 SV=1;tr|B8ZZW7
26.2607	25.8326	24.9981	26.3529	25.7079	NaN	26.381	26.2321	25.9439	NaN	NaN	24.8339	24.5666	NaN	NaN			9	9	9	29.2	29.2	29.2	37.567	0	43.313	709930000	30	25.711	25.8304	26.1857	24.7002	10	5	3	2	0.330154	-0.355232	-1.05949	P21695	P21695	Glycerol-3-phosphate dehydrogenase [NAD(+)], cytoplasmic	GPD1	1908	sp|P21695|GPDA_HUMAN Glycerol-3-phosphate dehydrogenase [NAD(+)], cytoplasmic OS=Homo sapiens OX=9606 GN=GPD1 PE=1 SV=4
25.2851	24.9518	25.6173	24.3555	24.6824	NaN	25.0187	25.6152	NaN	25.3567	NaN	NaN	NaN	NaN	NaN			3	3	3	8.8	8.8	8.8	54.283	0	19.782	305020000	23	25.1103	24.9784	25.3302	NaN	8	5	3	0	0.314867	-0.351767	-1.0966	Q9Y6W5	Q9Y6W5	Wiskott-Aldrich syndrome protein family member 2	WASF2	3958	sp|Q9Y6W5|WASF2_HUMAN Wiskott-Aldrich syndrome protein family member 2 OS=Homo sapiens OX=9606 GN=WASF2 PE=1 SV=3
25.1635	25.5586	25.7457	25.6896	24.6072	NaN	25.9051	NaN	26.0013	25.1804	NaN	NaN	NaN	NaN	NaN			4	4	4	24.5	24.5	24.5	26.56	0	34.756	525290000	26	25.4814	25.3529	25.6956	NaN	8	5	3	0	0.353035	-0.342742	-1.00648	Q9H6E4;B0QY51	Q9H6E4;B0QY51	Coiled-coil domain-containing protein 134	CCDC134	3537	sp|Q9H6E4|CC134_HUMAN Coiled-coil domain-containing protein 134 OS=Homo sapiens OX=9606 GN=CCDC134 PE=1 SV=1;tr|B0QY51|B0QY51_HUMAN Coiled-coil domain-containing protein 134 OS=Homo sapiens OX=9606 GN=CCDC134 PE=1 SV=1
25.2328	23.9381	25.8958	25.8594	25.9982	25.1658	25.3179	NaN	26.5148	NaN	24.8019	25.878	24.9976	25.2222	NaN			2	2	2	14.9	14.9	14.9	18.215	0	13.41	450840000	21	25.4019	25.3849	25.6662	25.2249	12	5	3	4	0.656536	-0.281298	-0.467652	E9PQM0;Q8WUK0	E9PQM0;Q8WUK0	Phosphatidylglycerophosphatase and protein-tyrosine phosphatase 1	PTPMT1	910	tr|E9PQM0|E9PQM0_HUMAN Phosphatidylglycerophosphatase and protein-tyrosine phosphatase 1 OS=Homo sapiens OX=9606 GN=PTPMT1 PE=1 SV=1;sp|Q8WUK0|PTPM1_HUMAN Phosphatidylglycerophosphatase and protein-tyrosine phosphatase 1 OS=Homo sapiens OX=9606 GN=PTPMT1 P
24.9448	24.7816	25.4621	25.2265	25.1768	NaN	25.5116	25.1873	25.1072	NaN	NaN	24.5218	NaN	NaN	NaN			3	3	3	32.7	32.7	32.7	12.77	0	13.933	187280000	18	25.1022	25.1184	25.2687	24.5218	9	5	3	1	0.438083	-0.150306	-0.830431	F5H702;Q96GC5;F5H8D0	F5H702;Q96GC5;F5H8D0	39S ribosomal protein L48, mitochondrial	MRPL48	952	tr|F5H702|F5H702_HUMAN 39S ribosomal protein L48, mitochondrial OS=Homo sapiens OX=9606 GN=MRPL48 PE=1 SV=1;sp|Q96GC5|RM48_HUMAN 39S ribosomal protein L48, mitochondrial OS=Homo sapiens OX=9606 GN=MRPL48 PE=1 SV=2;tr|F5H8D0|F5H8D0_HUMAN 39S ribosomal prote
26.8918	27.2334	26.5752	26.2272	26.8876	NaN	27.0684	26.9187	NaN	26.6127	26.7873	26.9557	NaN	NaN	NaN			4	4	4	53.1	53.1	53.1	8.85	0	81.138	1313700000	34	26.8158	26.7631	26.8666	26.8715	10	5	3	2	0.68912	-0.10353	-0.419987	Q8WVC2;Q9BYK1;P63220;Q9BYK2	Q8WVC2;Q9BYK1;P63220;Q9BYK2	40S ribosomal protein S21	RPS21	2426	tr|Q8WVC2|Q8WVC2_HUMAN 40S ribosomal protein S21 OS=Homo sapiens OX=9606 GN=RPS21 PE=1 SV=1;tr|Q9BYK1|Q9BYK1_HUMAN 40S ribosomal protein S21 OS=Homo sapiens OX=9606 GN=RPS21 PE=1 SV=1;sp|P63220|RS21_HUMAN 40S ribosomal protein S21 OS=Homo sapiens OX=9606 G
25.2015	24.8317	24.7943	24.3939	24.0816	NaN	24.1038	NaN	25.0724	25.0982	NaN	NaN	NaN	NaN	NaN			5	5	5	14	14	14	83.541	0	22.576	233370000	11	24.6972	24.6606	24.7582	NaN	8	5	3	0	0.790549	-0.0975704	-0.27772	Q99567;J3KMX1;I3L2W3;I3L245	Q99567;J3KMX1	Nuclear pore complex protein Nup88	NUP88	3356	sp|Q99567|NUP88_HUMAN Nuclear pore complex protein Nup88 OS=Homo sapiens OX=9606 GN=NUP88 PE=1 SV=2;tr|J3KMX1|J3KMX1_HUMAN Nuclear pore complex protein Nup88 (Fragment) OS=Homo sapiens OX=9606 GN=NUP88 PE=1 SV=1
25.1517	25.1301	24.9349	24.9445	24.723	25.2004	NaN	24.9456	NaN	25.0228	25.3457	25.5728	25.3081	NaN	NaN			6	6	6	19.3	19.3	19.3	45.489	0	24.671	365260000	20	25.1163	24.9768	25.0563	25.4089	11	5	3	3	0.524513	-0.0794146	-0.675517	J3KPS0;Q9NXW2;V9GYN7;V9GY70	J3KPS0;Q9NXW2;V9GYN7	DnaJ homolog subfamily B member 12	DNAJB12	1190	tr|J3KPS0|J3KPS0_HUMAN DnaJ (Hsp40) homolog, subfamily B, member 12, isoform CRA_c OS=Homo sapiens OX=9606 GN=DNAJB12 PE=1 SV=1;sp|Q9NXW2|DJB12_HUMAN DnaJ homolog subfamily B member 12 OS=Homo sapiens OX=9606 GN=DNAJB12 PE=1 SV=5;tr|V9GYN7|V9GYN7_HUMAN Dna
25.2207	26.1713	25.3428	25.5203	25.6035	25.4662	25.6737	NaN	NaN	25.7014	24.9267	NaN	NaN	NaN	NaN			8	8	8	18.5	18.5	18.5	60.234	0	15.365	470790000	17	25.5141	25.5717	25.6138	24.9267	9	5	3	1	0.858146	-0.0420638	-0.18657	Q02318;C9J1K5	Q02318	Sterol 26-hydroxylase, mitochondrial	CYP27A1	2493	sp|Q02318|CP27A_HUMAN Sterol 26-hydroxylase, mitochondrial OS=Homo sapiens OX=9606 GN=CYP27A1 PE=1 SV=1
25.4495	25.5267	25.3929	25.3952	25.376	NaN	25.5063	25.4626	NaN	25.4299	25.5281	24.8207	25.1075	25.3397	NaN			7	7	7	30.1	30.1	30.1	27.56	0	21.559	445000000	29	25.3613	25.4281	25.4663	25.199	12	5	3	4	0.378016	-0.0382296	-0.951656	Q9UKD2	Q9UKD2	mRNA turnover protein 4 homolog	MRTO4	3794	sp|Q9UKD2|MRT4_HUMAN mRNA turnover protein 4 homolog OS=Homo sapiens OX=9606 GN=MRTO4 PE=1 SV=2
25.6942	26.1135	25.2727	25.0549	25.0391	NaN	25.4154	25.0175	NaN	25.9459	NaN	NaN	NaN	NaN	NaN			2	2	2	10.1	10.1	10.1	26.044	0	25.009	504180000	15	25.4442	25.4349	25.4596	NaN	8	5	3	0	0.944246	-0.0246798	-0.0729126	P19075	P19075	Tetraspanin-8	TSPAN8	1878	sp|P19075|TSN8_HUMAN Tetraspanin-8 OS=Homo sapiens OX=9606 GN=TSPAN8 PE=1 SV=1
26.076	25.6406	26.5241	26.5341	25.8181	NaN	26.0503	26.3054	NaN	26.0624	25.9337	26.2877	25.5167	26.0322	NaN			9	9	9	23.6	23.6	23.6	62.223	0	38.459	1095500000	35	26.0651	26.1186	26.1393	25.9426	12	5	3	4	0.936356	-0.0207537	-0.0832556	Q9HA77;H0YFF0;F5H579;A0A087WWV1;H0YFV1;F5H623	Q9HA77	Probable cysteine--tRNA ligase, mitochondrial	CARS2	3561	sp|Q9HA77|SYCM_HUMAN Probable cysteine--tRNA ligase, mitochondrial OS=Homo sapiens OX=9606 GN=CARS2 PE=1 SV=1
25.7729	26.3338	25.9626	25.8288	25.7249	NaN	26.018	25.8716	NaN	25.8886	NaN	26.0445	24.6944	NaN	NaN			2	2	2	12.4	12.4	12.4	32.509	0	26.046	388880000	16	25.814	25.9246	25.9261	25.3695	10	5	3	2	0.99242	-0.00148722	-0.00990253	Q9NVV0;A0A0A0MRS4	Q9NVV0;A0A0A0MRS4	Trimeric intracellular cation channel type B	TMEM38B	3668	sp|Q9NVV0|TM38B_HUMAN Trimeric intracellular cation channel type B OS=Homo sapiens OX=9606 GN=TMEM38B PE=1 SV=1;tr|A0A0A0MRS4|A0A0A0MRS4_HUMAN Transmembrane protein 38B, isoform CRA_b OS=Homo sapiens OX=9606 GN=TMEM38B PE=1 SV=1
25.769	25.887	25.7684	25.9426	26.0569	NaN	26.1491	25.7541	NaN	25.7285	NaN	NaN	25.1883	25.7022	NaN			4	4	4	17.9	17.9	17.9	34.812	0	22.135	725060000	26	25.7946	25.8848	25.8773	25.4452	10	5	3	2	0.95344	0.00750643	0.0608694	B4DHE8;Q96DH6;J3KTC1;J3QKT5;B4DM51	B4DHE8;Q96DH6;J3KTC1;J3QKT5;B4DM51	RNA-binding protein Musashi homolog 2	MSI2	508	tr|B4DHE8|B4DHE8_HUMAN RNA-binding protein Musashi homolog 2 OS=Homo sapiens OX=9606 GN=MSI2 PE=1 SV=1;sp|Q96DH6|MSI2H_HUMAN RNA-binding protein Musashi homolog 2 OS=Homo sapiens OX=9606 GN=MSI2 PE=1 SV=1;tr|J3KTC1|J3KTC1_HUMAN RNA-binding protein Musashi
26.5031	26.808	26.3642	26.5436	26.7992	NaN	26.7919	26.6967	26.2417	NaN	NaN	NaN	NaN	NaN	NaN			3	3	3	26.5	26.5	26.5	24.57	0	41.48	777220000	18	26.5936	26.6036	26.5768	NaN	8	5	3	0	0.879499	0.0268422	0.158187	Q9NZZ3	Q9NZZ3	Charged multivesicular body protein 5	CHMP5	3712	sp|Q9NZZ3|CHMP5_HUMAN Charged multivesicular body protein 5 OS=Homo sapiens OX=9606 GN=CHMP5 PE=1 SV=1
25.3717	25.06	25.2456	25.464	25.6463	NaN	25.4003	25.3345	NaN	25.2226	NaN	NaN	NaN	NaN	NaN			8	8	8	21.1	21.1	21.1	71.689	0	33.222	539440000	24	25.3431	25.3575	25.3191	NaN	8	5	3	0	0.789109	0.038405	0.279687	O60216;E5RFZ5;E5RG18;E5RI01;E5RFV8;E5RIN7;E5RJW1;E5RJK5;Q9H4I0	O60216	Double-strand-break repair protein rad21 homolog	RAD21	1433	sp|O60216|RAD21_HUMAN Double-strand-break repair protein rad21 homolog OS=Homo sapiens OX=9606 GN=RAD21 PE=1 SV=2
26.4838	25.8518	25.8704	26.4727	26.6016	NaN	26.3292	26.405	NaN	25.8595	NaN	25.1786	NaN	NaN	NaN			6	5	5	32.7	28.4	28.4	18.762	0	21.212	1206200000	29	26.117	26.2561	26.1979	25.1786	9	5	3	1	0.823985	0.0581656	0.232355	O60493	O60493	Sorting nexin-3	SNX3	1445	sp|O60493|SNX3_HUMAN Sorting nexin-3 OS=Homo sapiens OX=9606 GN=SNX3 PE=1 SV=3
25.1658	24.8071	25.7111	25.7062	25.5064	NaN	25.2068	NaN	25.4463	25.3066	NaN	NaN	NaN	NaN	NaN			4	4	4	17.1	17.1	17.1	31.905	0	8.2689	365230000	11	25.357	25.3793	25.3199	NaN	8	5	3	0	0.811012	0.0593705	0.249884	F8VYY9;P54619;H0YHF8;H0YIC9;F8VSH3;F8VRY2;F8VSL2;F8VPF5;F8VVA3;F8VZX1;A0A494C068;E9PGP6;A0A494C1K7;Q9UGJ0	F8VYY9;P54619;H0YHF8;H0YIC9	5-AMP-activated protein kinase subunit gamma-1	PRKAG1	983	tr|F8VYY9|F8VYY9_HUMAN 5-AMP-activated protein kinase subunit gamma-1 OS=Homo sapiens OX=9606 GN=PRKAG1 PE=1 SV=1;sp|P54619|AAKG1_HUMAN 5-AMP-activated protein kinase subunit gamma-1 OS=Homo sapiens OX=9606 GN=PRKAG1 PE=1 SV=1;tr|H0YHF8|H0YHF8_HUMAN 5-A
25.8467	25.5669	25.8658	25.5292	25.5442	NaN	25.7595	25.5755	25.4603	NaN	NaN	NaN	NaN	NaN	NaN			4	4	4	19.5	19.5	19.5	39.315	0	45.321	367100000	20	25.6435	25.6706	25.5985	NaN	8	5	3	0	0.569147	0.0721068	0.602098	Q9NXG2;H3BNW0	Q9NXG2;H3BNW0	THUMP domain-containing protein 1	THUMPD1	3689	sp|Q9NXG2|THUM1_HUMAN THUMP domain-containing protein 1 OS=Homo sapiens OX=9606 GN=THUMPD1 PE=1 SV=2;tr|H3BNW0|H3BNW0_HUMAN THUMP domain-containing protein 1 OS=Homo sapiens OX=9606 GN=THUMPD1 PE=1 SV=1
25.9189	25.905	25.861	25.8902	25.8191	NaN	25.6956	25.9759	NaN	25.725	NaN	NaN	NaN	NaN	NaN			9	9	9	7.6	7.6	7.6	201.8	0	31.524	576530000	21	25.8488	25.8788	25.7989	NaN	8	5	3	0	0.291463	0.079954	1.15644	A8MQ02;J3KN01;P55196;Q5TIG5;F8W9I4;E9PFY5;H0YA98;H0Y948;H0Y8L4;H0Y7R8	A8MQ02;J3KN01;P55196;Q5TIG5	Afadin	MLLT4	460	tr|A8MQ02|A8MQ02_HUMAN Afadin OS=Homo sapiens OX=9606 GN=AFDN PE=1 SV=2;tr|J3KN01|J3KN01_HUMAN Afadin OS=Homo sapiens OX=9606 GN=AFDN PE=1 SV=1;sp|P55196|AFAD_HUMAN Afadin OS=Homo sapiens OX=9606 GN=AFDN PE=1 SV=3;tr|Q5TIG5|Q5TIG5_HUMAN Afadin OS=Homo sapi
25.001	25.2775	24.9521	25.3875	25.1277	NaN	25.3167	NaN	25.005	24.8656	NaN	NaN	NaN	NaN	NaN			4	4	4	38.1	38.1	38.1	15.795	0	65.736	310050000	10	25.1166	25.1492	25.0624	NaN	8	5	3	0	0.575144	0.0867605	0.592509	H3BRD2;P55789;H3BRW3;H3BQQ4	H3BRD2;P55789;H3BRW3;H3BQQ4	Sulfhydryl oxidase;FAD-linked sulfhydryl oxidase ALR	GFER	1118	tr|H3BRD2|H3BRD2_HUMAN Sulfhydryl oxidase (Fragment) OS=Homo sapiens OX=9606 GN=GFER PE=1 SV=1;sp|P55789|ALR_HUMAN FAD-linked sulfhydryl oxidase ALR OS=Homo sapiens OX=9606 GN=GFER PE=1 SV=2;tr|H3BRW3|H3BRW3_HUMAN FAD-linked sulfhydryl oxidase ALR OS=Homo
26.2137	26.368	25.928	26.1392	26.1131	NaN	26.1814	25.9076	NaN	26.0421	26.6796	NaN	26.5097	26.2511	NaN			6	6	6	43.1	43.1	43.1	29.841	0	51.283	660190000	30	26.2121	26.1524	26.0437	26.4801	11	5	3	3	0.367041	0.108734	0.975379	O75937	O75937	DnaJ homolog subfamily C member 8	DNAJC8	1523	sp|O75937|DNJC8_HUMAN DnaJ homolog subfamily C member 8 OS=Homo sapiens OX=9606 GN=DNAJC8 PE=1 SV=2
25.1702	25.178	25.166	26.1406	26.0517	NaN	25.5509	25.342	NaN	25.2397	NaN	25.4174	NaN	NaN	NaN			4	4	3	5.5	5.5	4	131.29	0	11.819	325960000	7	25.4729	25.5413	25.3775	25.4174	9	5	3	1	0.616215	0.163754	0.528357	A0A1B0GUN5;Q5VTI5;Q9Y2H5	A0A1B0GUN5;Q5VTI5;Q9Y2H5	Pleckstrin homology domain-containing family A member 6	PLEKHA6	263	tr|A0A1B0GUN5|A0A1B0GUN5_HUMAN Pleckstrin homology domain-containing family A member 6 OS=Homo sapiens OX=9606 GN=PLEKHA6 PE=1 SV=1;tr|Q5VTI5|Q5VTI5_HUMAN Pleckstrin homology domain-containing family A member 6 OS=Homo sapiens OX=9606 GN=PLEKHA6 PE=1 SV=1;
27.67	27.193	27.705	27.4155	27.496	NaN	27.3496	27.0915	NaN	27.5221	NaN	27.0549	NaN	NaN	NaN			7	7	7	46.8	46.8	46.8	18.431	0	34.237	1578000000	24	27.3886	27.4959	27.3211	27.0549	9	5	3	1	0.298982	0.174851	1.13679	P62280;M0QZC5;M0R1H5;M0R1H6	P62280;M0QZC5;M0R1H5	40S ribosomal protein S11	RPS11	2388	sp|P62280|RS11_HUMAN 40S ribosomal protein S11 OS=Homo sapiens OX=9606 GN=RPS11 PE=1 SV=3;tr|M0QZC5|M0QZC5_HUMAN 40S ribosomal protein S11 OS=Homo sapiens OX=9606 GN=RPS11 PE=1 SV=1;tr|M0R1H5|M0R1H5_HUMAN 40S ribosomal protein S11 OS=Homo sapiens OX=9606 G
25.6191	25.4486	26.2957	26.0262	25.8052	25.4204	25.7101	25.809	NaN	NaN	NaN	25.9564	26.3513	26.3828	NaN			4	4	4	26	26	26	24.267	0	16.081	688820000	18	25.8932	25.839	25.6465	26.2302	11	5	3	3	0.40817	0.192466	0.889117	O95716;M0R257;P20336	O95716	Ras-related protein Rab-3D	RAB3D	1585	sp|O95716|RAB3D_HUMAN Ras-related protein Rab-3D OS=Homo sapiens OX=9606 GN=RAB3D PE=1 SV=1
25.6697	25.6877	26.2517	25.7299	25.8029	25.5674	NaN	NaN	25.6934	25.5676	NaN	NaN	26.1354	26.3436	NaN			4	4	4	7.6	7.6	7.6	58.22	0	24.016	561230000	21	25.8449	25.8284	25.6095	26.2395	10	5	3	2	0.18852	0.218936	1.4833	J3KPP4;O95232;D6RHH0;U3KQT3;D6RDI2;H0YA81	J3KPP4;O95232;D6RHH0;U3KQT3;D6RDI2	Luc7-like protein 3	LUC7L3	1189	tr|J3KPP4|J3KPP4_HUMAN Cisplatin resistance-associated overexpressed protein, isoform CRA_b OS=Homo sapiens OX=9606 GN=LUC7L3 PE=1 SV=1;sp|O95232|LC7L3_HUMAN Luc7-like protein 3 OS=Homo sapiens OX=9606 GN=LUC7L3 PE=1 SV=2;tr|D6RHH0|D6RHH0_HUMAN Luc7-like p
26.2945	26.8229	26.556	26.7882	26.3851	NaN	26.4421	26.3562	26.1284	NaN	NaN	NaN	NaN	NaN	NaN			4	4	4	36.8	36.8	36.8	20.567	0	19.742	694350000	16	26.4717	26.5693	26.3089	NaN	8	5	3	0	0.14649	0.260393	1.66736	P21291;E9PND2;E9PP21;E9PS42	P21291;E9PND2;E9PP21;E9PS42	Cysteine and glycine-rich protein 1	CSRP1	1904	sp|P21291|CSRP1_HUMAN Cysteine and glycine-rich protein 1 OS=Homo sapiens OX=9606 GN=CSRP1 PE=1 SV=3;tr|E9PND2|E9PND2_HUMAN Cysteine and glycine-rich protein 1 (Fragment) OS=Homo sapiens OX=9606 GN=CSRP1 PE=1 SV=1;tr|E9PP21|E9PP21_HUMAN Cysteine and glycin
31.4686	31.8791	31.6495	32.3235	31.699	NaN	31.8946	30.6483	NaN	31.6323	NaN	NaN	NaN	NaN	NaN			10	10	10	25.5	25.5	25.5	75.356	0	31.24	19735000000	48	31.6494	31.804	31.3917	NaN	8	5	3	0	0.268559	0.412224	1.21909	Q8IVT2	Q8IVT2	Mitotic interactor and substrate of PLK1	MISP	3008	sp|Q8IVT2|MISP_HUMAN Mitotic interactor and substrate of PLK1 OS=Homo sapiens OX=9606 GN=MISP PE=1 SV=1
27.1676	26.4641	26.0523	25.1096	26.6968	NaN	26.1728	26.052	NaN	24.062	NaN	NaN	NaN	24.464	NaN			5	5	3	9.5	9.5	7.2	74.543	0	41.574	1068700000	47	25.8046	26.2981	25.4289	24.464	9	5	3	1	0.249355	0.86916	1.2753	A0A0A0MRM9;Q14978;S4R349;S4R402	A0A0A0MRM9;Q14978;S4R349	Nucleolar and coiled-body phosphoprotein 1	NOLC1	136	tr|A0A0A0MRM9|A0A0A0MRM9_HUMAN Nucleolar and coiled-body phosphoprotein 1 (Fragment) OS=Homo sapiens OX=9606 GN=NOLC1 PE=1 SV=1;sp|Q14978|NOLC1_HUMAN Nucleolar and coiled-body phosphoprotein 1 OS=Homo sapiens OX=9606 GN=NOLC1 PE=1 SV=2;tr|S4R349|S4R349_HUM
25.9934	25.3277	25.6373	NaN	26.2659	NaN	25.3266	24.0021	24.8189	NaN	NaN	NaN	NaN	NaN	NaN	+	3NT_Control	2	2	2	5	5	5	103.39	0	16.617	364820000	20	25.3389	25.8061	24.7159	NaN	7	4	3	0	0.0427603	1.09018	2.70047	A9Z1X7;Q8IYB3;M0R1E7;M0QXG5;M0R088;E9PCT1	A9Z1X7;Q8IYB3;M0R1E7;M0QXG5;M0R088;E9PCT1	Serine/arginine repetitive matrix protein 1	SRRM1	474	tr|A9Z1X7|A9Z1X7_HUMAN Serine/arginine repetitive matrix protein 1 OS=Homo sapiens OX=9606 GN=SRRM1 PE=1 SV=1;sp|Q8IYB3|SRRM1_HUMAN Serine/arginine repetitive matrix protein 1 OS=Homo sapiens OX=9606 GN=SRRM1 PE=1 SV=2;tr|M0R1E7|M0R1E7_HUMAN Serine/arginin
24.646	24.3889	NaN	25.2385	24.9605	26.6709	24.5812	25.9524	NaN	NaN	27.8789	26.582	27.1062	27.9971	NaN			4	4	4	21.6	21.6	21.6	25.308	0	14.573	746770000	23	26.0002	24.8085	25.7348	27.3911	11	4	3	4	0.157528	-0.926363	-1.66138	D6REQ6;D6RHI9;A0A087WZM2;O00584;H0YAE9	D6REQ6;D6RHI9;A0A087WZM2;O00584;H0YAE9	Ribonuclease T2	RNASET2	78	tr|D6REQ6|D6REQ6_HUMAN Ribonuclease T2 OS=Homo sapiens OX=9606 GN=RNASET2 PE=1 SV=1;tr|D6RHI9|D6RHI9_HUMAN Ribonuclease T2 (Fragment) OS=Homo sapiens OX=9606 GN=RNASET2 PE=1 SV=8;tr|A0A087WZM2|A0A087WZM2_HUMAN Ribonuclease T2 OS=Homo sapiens OX=9606 GN=RNA
25.2483	23.2148	23.0526	NaN	23.1782	NaN	24.8795	24.5451	NaN	23.1249	NaN	NaN	NaN	NaN	NaN			4	4	4	5.4	5.4	5.4	115.9	0	24.022	187300000	14	23.8919	23.6735	24.1832	NaN	7	4	3	0	0.536348	-0.509684	-0.663543	A0A1B0GTU4;F5GZ78;A0A1B0GU60;P49023;F5H836;A0A1B0GWE7;A0A1B0GV30	A0A1B0GTU4;F5GZ78;A0A1B0GU60;P49023	Paxillin	PXN	258	tr|A0A1B0GTU4|A0A1B0GTU4_HUMAN Paxillin OS=Homo sapiens OX=9606 GN=PXN PE=1 SV=1;tr|F5GZ78|F5GZ78_HUMAN Paxillin OS=Homo sapiens OX=9606 GN=PXN PE=1 SV=1;tr|A0A1B0GU60|A0A1B0GU60_HUMAN Paxillin OS=Homo sapiens OX=9606 GN=PXN PE=1 SV=1;sp|P49023|PAXI_HUMAN
26.0573	25.1514	NaN	26.2655	26.8235	NaN	26.1919	26.191	27.3227	NaN	NaN	27.1259	26.5071	26.3168	NaN			2	2	2	23.8	23.8	23.8	10.978	0	7.4029	1056800000	36	26.3953	26.0744	26.5685	26.6499	10	4	3	3	0.384218	-0.494143	-0.953298	J3QS48;I3L295;J3KTK8;J3QQZ4;J3KT75;J3QW43;J3QRD5;O75352;J3KSI4;I3L405;I3L261;I3L1D2;I3L4E0	J3QS48;I3L295;J3KTK8;J3QQZ4;J3KT75;J3QW43;J3QRD5;O75352;J3KSI4;I3L405;I3L261;I3L1D2;I3L4E0	Mannose-P-dolichol utilization defect 1 protein	MPDU1	1175	tr|J3QS48|J3QS48_HUMAN Mannose-P-dolichol utilization defect 1 protein OS=Homo sapiens OX=9606 GN=MPDU1 PE=1 SV=1;tr|I3L295|I3L295_HUMAN Mannose-P-dolichol utilization defect 1 isoform 2 OS=Homo sapiens OX=9606 GN=MPDU1 PE=1 SV=1;tr|J3KTK8|J3KTK8_HUMAN Man
24.6607	24.5866	24.639	NaN	25.1326	NaN	25.3812	NaN	24.7295	25.2659	24.8875	NaN	NaN	24.6168	NaN			7	7	7	14	14	14	80.473	0	13.146	340630000	27	24.8778	24.7547	25.1255	24.7522	9	4	3	2	0.160774	-0.370777	-1.64555	Q04446;E9PGM4	Q04446;E9PGM4	1,4-alpha-glucan-branching enzyme	GBE1	2504	sp|Q04446|GLGB_HUMAN 1,4-alpha-glucan-branching enzyme OS=Homo sapiens OX=9606 GN=GBE1 PE=1 SV=3;tr|E9PGM4|E9PGM4_HUMAN 1,4-alpha-glucan branching enzyme OS=Homo sapiens OX=9606 GN=GBE1 PE=1 SV=1
25.7565	25.4678	25.5048	NaN	25.1553	NaN	25.905	25.8461	NaN	25.6097	NaN	NaN	NaN	NaN	NaN			2	2	2	7.7	7.7	7.7	35.3	0	19.812	355980000	15	25.6064	25.4711	25.7869	NaN	7	4	3	0	0.112511	-0.315825	-1.92289	O75845;E9PPW5;E9PQ91	O75845;E9PPW5;E9PQ91	Lathosterol oxidase	SC5D	1516	sp|O75845|SC5D_HUMAN Lathosterol oxidase OS=Homo sapiens OX=9606 GN=SC5D PE=1 SV=2;tr|E9PPW5|E9PPW5_HUMAN Lathosterol oxidase (Fragment) OS=Homo sapiens OX=9606 GN=SC5D PE=1 SV=1;tr|E9PQ91|E9PQ91_HUMAN Lathosterol oxidase OS=Homo sapiens OX=9606 GN=SC5D PE
25.8811	25.0588	25.3526	NaN	24.8922	NaN	25.8324	25.7848	NaN	25.1541	NaN	NaN	NaN	NaN	NaN			3	3	3	25.1	25.1	25.1	21.308	0	15.949	309440000	20	25.4223	25.2962	25.5904	NaN	7	4	3	0	0.393444	-0.294209	-0.933434	P84095	P84095	Rho-related GTP-binding protein RhoG	RHOG	2465	sp|P84095|RHOG_HUMAN Rho-related GTP-binding protein RhoG OS=Homo sapiens OX=9606 GN=RHOG PE=1 SV=1
24.1942	NaN	24.4017	24.7108	24.1244	NaN	24.715	24.6785	NaN	24.5435	NaN	NaN	NaN	NaN	NaN			6	6	6	18.8	18.8	18.8	37.855	0	83.626	176080000	27	24.4812	24.3578	24.6457	NaN	7	4	3	0	0.135098	-0.287891	-1.78055	P53365;A0A087X1E4;E9PRV8	P53365;A0A087X1E4	Arfaptin-2	ARFIP2	94	sp|P53365|ARFP2_HUMAN Arfaptin-2 OS=Homo sapiens OX=9606 GN=ARFIP2 PE=1 SV=1;tr|A0A087X1E4|A0A087X1E4_HUMAN Arfaptin-2 OS=Homo sapiens OX=9606 GN=ARFIP2 PE=1 SV=1
25.9395	NaN	27.539	27.396	25.9308	NaN	27.1903	27.5727	26.0058	NaN	NaN	NaN	NaN	NaN	NaN			2	2	2	17.2	17.2	17.2	16.298	0	6.7746	758670000	17	26.7963	26.7013	26.9229	NaN	7	4	3	0	0.749391	-0.221587	-0.337579	Q15388	Q15388	Mitochondrial import receptor subunit TOM20 homolog	TOMM20	2718	sp|Q15388|TOM20_HUMAN Mitochondrial import receptor subunit TOM20 homolog OS=Homo sapiens OX=9606 GN=TOMM20 PE=1 SV=1
25.511	NaN	25.6127	25.3473	25.2864	NaN	25.9356	25.3724	NaN	25.5421	NaN	NaN	NaN	NaN	NaN			4	4	4	37.7	37.7	37.7	24.737	0	44.272	631240000	19	25.5153	25.4393	25.6167	NaN	7	4	3	0	0.332148	-0.177354	-1.07338	O95372;Q5QPQ0;Q5QPN9;Q5QPQ1;Q5QPQ3;Q5QPQ2;Q5QPN5	O95372;Q5QPQ0;Q5QPN9;Q5QPQ1;Q5QPQ3;Q5QPQ2	Acyl-protein thioesterase 2	LYPLA2	1565	sp|O95372|LYPA2_HUMAN Acyl-protein thioesterase 2 OS=Homo sapiens OX=9606 GN=LYPLA2 PE=1 SV=1;tr|Q5QPQ0|Q5QPQ0_HUMAN Acyl-protein thioesterase 2 OS=Homo sapiens OX=9606 GN=LYPLA2 PE=1 SV=1;tr|Q5QPN9|Q5QPN9_HUMAN Acyl-protein thioesterase 2 OS=Homo sapiens
25.5864	26.379	25.4516	NaN	25.6536	NaN	26.7789	25.5429	NaN	25.461	NaN	NaN	NaN	NaN	NaN			6	6	6	48	48	48	22.655	0	28.465	645250000	17	25.8362	25.7677	25.9276	NaN	7	4	3	0	0.727158	-0.15997	-0.369114	Q9BRP8	Q9BRP8	Partner of Y14 and mago	WIBG	3395	sp|Q9BRP8|PYM1_HUMAN Partner of Y14 and mago OS=Homo sapiens OX=9606 GN=PYM1 PE=1 SV=1
25.753	26.1437	24.5672	25.7608	NaN	25.7471	NaN	25.4287	NaN	25.9311	NaN	26.3975	25.1635	NaN	NaN			6	6	3	12.9	12.9	7.1	57.81	0	45.584	640280000	30	25.6547	25.5562	25.7023	25.7805	9	4	3	2	0.743721	-0.146149	-0.345583	O00505;H0Y4S9	O00505	Importin subunit alpha-4	KPNA3	1315	sp|O00505|IMA4_HUMAN Importin subunit alpha-4 OS=Homo sapiens OX=9606 GN=KPNA3 PE=1 SV=2
25.1826	25.2782	25.0527	NaN	24.7533	NaN	25.1486	25.0776	NaN	25.3969	NaN	NaN	NaN	NaN	NaN			7	7	7	10.9	10.9	10.9	100.89	0	40.939	526560000	25	25.1271	25.0667	25.2077	NaN	7	4	3	0	0.411915	-0.140986	-0.894756	Q13206;E9PIF2;A0A3B3ISR7	Q13206;E9PIF2;A0A3B3ISR7	Probable ATP-dependent RNA helicase DDX10	DDX10	868	sp|Q13206|DDX10_HUMAN Probable ATP-dependent RNA helicase DDX10 OS=Homo sapiens OX=9606 GN=DDX10 PE=1 SV=2;tr|E9PIF2|E9PIF2_HUMAN RNA helicase OS=Homo sapiens OX=9606 GN=DDX10 PE=1 SV=1;tr|A0A3B3ISR7|A0A3B3ISR7_HUMAN RNA helicase OS=Homo sapiens OX=9606 GN
25.6479	25.4577	25.6328	NaN	25.613	NaN	25.7587	25.9369	NaN	25.4902	NaN	NaN	NaN	NaN	NaN			8	8	8	31	31	31	35.419	0	43.137	1115800000	39	25.6482	25.5878	25.7286	NaN	7	4	3	0	0.295123	-0.140784	-1.16893	Q9Y2S2;A0A2R8YCZ4;A0A2R8Y4K2;A0A2R8YFQ7;A0A087WW38;A0A2R8Y7B4;A0A2R8Y5S5	Q9Y2S2;A0A2R8YCZ4;A0A2R8Y4K2;A0A2R8YFQ7;A0A087WW38	Lambda-crystallin homolog	CRYL1	3865	sp|Q9Y2S2|CRYL1_HUMAN Lambda-crystallin homolog OS=Homo sapiens OX=9606 GN=CRYL1 PE=1 SV=3;tr|A0A2R8YCZ4|A0A2R8YCZ4_HUMAN Lambda-crystallin homolog OS=Homo sapiens OX=9606 GN=CRYL1 PE=1 SV=1;tr|A0A2R8Y4K2|A0A2R8Y4K2_HUMAN Crystallin, lambda 1, isoform CRA_
25.4657	25.3446	24.8068	NaN	25.1189	25.0553	25.5825	25.2829	NaN	NaN	NaN	NaN	NaN	NaN	NaN			15	15	15	10.4	10.4	10.4	299.61	0	41.644	454830000	21	25.2367	25.184	25.3069	NaN	7	4	3	0	0.590084	-0.122928	-0.575179	Q9UQ35;I3L4D8;I3L1I8;I3L182;I3L1C0;A0A087X1W1;I3L0N7	Q9UQ35	Serine/arginine repetitive matrix protein 2	SRRM2	3838	sp|Q9UQ35|SRRM2_HUMAN Serine/arginine repetitive matrix protein 2 OS=Homo sapiens OX=9606 GN=SRRM2 PE=1 SV=2
26.7145	27.4471	26.3828	NaN	26.6637	NaN	26.9647	NaN	27.2852	26.4847	NaN	NaN	NaN	NaN	NaN			8	8	8	15	15	15	81.316	0	40.675	367050000	17	26.849	26.802	26.9115	NaN	7	4	3	0	0.754723	-0.109497	-0.330076	P46199;H7C213	P46199	Translation initiation factor IF-2, mitochondrial	MTIF2	2155	sp|P46199|IF2M_HUMAN Translation initiation factor IF-2, mitochondrial OS=Homo sapiens OX=9606 GN=MTIF2 PE=1 SV=2
24.9921	25.0612	24.6104	NaN	24.825	NaN	24.7774	24.9313	NaN	25.2194	NaN	NaN	NaN	25.0501	NaN			7	7	7	26.5	26.5	26.5	47.534	0	16.174	423680000	15	24.9333	24.8722	24.976	25.0501	8	4	3	1	0.546886	-0.103828	-0.645779	Q9Y276;C9J8G3;H7C492;C9JAS4;C9J1S9;A0A2R8Y7T3;H7BZF6	Q9Y276;C9J8G3	Mitochondrial chaperone BCS1	BCS1L	3847	sp|Q9Y276|BCS1_HUMAN Mitochondrial chaperone BCS1 OS=Homo sapiens OX=9606 GN=BCS1L PE=1 SV=1;tr|C9J8G3|C9J8G3_HUMAN Mitochondrial chaperone BCS1 (Fragment) OS=Homo sapiens OX=9606 GN=BCS1L PE=1 SV=1
24.142	23.4134	22.9911	NaN	23.9527	22.8901	23.7854	NaN	NaN	24.4964	NaN	NaN	NaN	NaN	NaN			3	3	3	52.9	52.9	52.9	15.436	0	19.072	126920000	16	23.6673	23.6248	23.7239	NaN	7	4	3	0	0.849733	-0.0991454	-0.199498	A0A140TA86;Q5XKP0;K7EIR2;A0A140TA84	A0A140TA86;Q5XKP0;K7EIR2;A0A140TA84	Protein QIL1	QIL1;C19orf70	249	tr|A0A140TA86|A0A140TA86_HUMAN MICOS complex subunit MIC13 OS=Homo sapiens OX=9606 GN=MICOS13 PE=1 SV=1;sp|Q5XKP0|MIC13_HUMAN MICOS complex subunit MIC13 OS=Homo sapiens OX=9606 GN=MICOS13 PE=1 SV=1;tr|K7EIR2|K7EIR2_HUMAN MICOS complex subunit MIC13 OS=Hom
25.1332	24.547	25.1704	NaN	24.9439	NaN	25.1567	25.1882	NaN	24.7154	NaN	NaN	NaN	NaN	NaN			7	7	6	22.6	22.6	20.5	60.293	0	56.641	523910000	23	24.9793	24.9486	25.0201	NaN	7	4	3	0	0.749404	-0.0714738	-0.337561	Q9Y6I3	Q9Y6I3	Epsin-1	EPN1	3952	sp|Q9Y6I3|EPN1_HUMAN Epsin-1 OS=Homo sapiens OX=9606 GN=EPN1 PE=1 SV=2
25.3154	25.1785	24.8025	NaN	24.5286	NaN	25.2886	25.1359	NaN	24.5441	NaN	NaN	NaN	NaN	NaN			12	12	12	18.2	18.2	18.2	123.51	0	56.033	529030000	27	24.9705	24.9562	24.9895	NaN	7	4	3	0	0.911442	-0.0332856	-0.116964	Q6PKG0;A0A0B4J210;E5RH50;H0YBW1;H0YC73;H0YAN4;H0YC33;A0A3B3ISF0;Q659C4;E5RHK4	Q6PKG0;A0A0B4J210;E5RH50	La-related protein 1	LARP1	2917	sp|Q6PKG0|LARP1_HUMAN La-related protein 1 OS=Homo sapiens OX=9606 GN=LARP1 PE=1 SV=2;tr|A0A0B4J210|A0A0B4J210_HUMAN La-related protein 1 (Fragment) OS=Homo sapiens OX=9606 GN=LARP1 PE=1 SV=5;tr|E5RH50|E5RH50_HUMAN La-related protein 1 (Fragment) OS=Homo s
24.7832	24.2645	24.1969	NaN	23.9561	NaN	24.5601	24.1284	NaN	24.2554	NaN	NaN	NaN	NaN	NaN			3	3	3	14.4	14.4	14.4	29.537	0	7.7579	209240000	6	24.3064	24.3002	24.3146	NaN	7	4	3	0	0.952758	-0.014459	-0.0622734	Q9BTZ2;F5GWZ1;F6TD35;E9PFL3;H0YN69;Q6PKH6;P0CG22	Q9BTZ2;F5GWZ1	Dehydrogenase/reductase SDR family member 4	DHRS4	3417	sp|Q9BTZ2|DHRS4_HUMAN Dehydrogenase/reductase SDR family member 4 OS=Homo sapiens OX=9606 GN=DHRS4 PE=1 SV=3;tr|F5GWZ1|F5GWZ1_HUMAN Dehydrogenase/reductase SDR family member 4 OS=Homo sapiens OX=9606 GN=DHRS4 PE=1 SV=1
25.3429	25.6112	25.3508	NaN	24.7301	NaN	25.6565	25.3372	NaN	24.7743	NaN	NaN	NaN	NaN	NaN			5	2	2	29.7	14.4	14.4	25.098	0.0021231	2.5278	262230000	7	25.2576	25.2587	25.256	NaN	7	4	3	0	0.993348	0.00270732	0.00876224	Q9BY43;H0YIN6	Q9BY43	Charged multivesicular body protein 4a	CHMP4A	3459	sp|Q9BY43|CHM4A_HUMAN Charged multivesicular body protein 4a OS=Homo sapiens OX=9606 GN=CHMP4A PE=1 SV=3
25.9931	26.3288	NaN	26.652	26.7781	NaN	26.5398	NaN	26.0645	26.6516	NaN	NaN	NaN	NaN	NaN			13	3	3	37.8	10.7	10.7	57.376	0	13.643	384270000	18	26.4297	26.438	26.4186	NaN	7	4	3	0	0.942829	0.0193669	0.0753888	P10696	P10696	Alkaline phosphatase, placental-like	ALPPL2	1759	sp|P10696|PPBN_HUMAN Alkaline phosphatase, germ cell type OS=Homo sapiens OX=9606 GN=ALPG PE=2 SV=4
25.8946	25.9571	25.4461	NaN	25.8111	NaN	26.1561	25.796	NaN	25.3089	NaN	NaN	NaN	NaN	NaN			3	3	3	22.9	22.9	22.9	23.661	0	32.405	557200000	18	25.7671	25.7772	25.7537	NaN	7	4	3	0	0.927429	0.0235534	0.0957622	X6R700;Q9Y3Y2;A0A087X1B7;Q5T7Y7	X6R700;Q9Y3Y2	Chromatin target of PRMT1 protein	CHTOP	3900	tr|X6R700|X6R700_HUMAN Chromatin target of PRMT1 protein OS=Homo sapiens OX=9606 GN=CHTOP PE=1 SV=1;sp|Q9Y3Y2|CHTOP_HUMAN Chromatin target of PRMT1 protein OS=Homo sapiens OX=9606 GN=CHTOP PE=1 SV=2
26.144	NaN	25.9634	26.0078	25.7397	NaN	26.3545	25.5582	NaN	25.7979	NaN	NaN	NaN	NaN	NaN			4	4	4	34.5	34.5	34.5	21.445	0	24.631	612540000	18	25.9379	25.9637	25.9035	NaN	7	4	3	0	0.796246	0.0601719	0.272344	Q9BY32	Q9BY32	Inosine triphosphate pyrophosphatase	ITPA	3458	sp|Q9BY32|ITPA_HUMAN Inosine triphosphate pyrophosphatase OS=Homo sapiens OX=9606 GN=ITPA PE=1 SV=2
24.8762	24.2431	24.468	NaN	24.4398	24.0805	NaN	25.2263	23.9901	NaN	24.7956	NaN	NaN	24.5378	NaN			3	3	3	19.6	19.6	19.6	15.641	0	7.6168	341990000	33	24.5175	24.5068	24.4323	24.6667	9	4	3	2	0.847565	0.0745217	0.202423	Q96C01;E7EQY1;C9J2Y4	Q96C01;E7EQY1;C9J2Y4	Protein FAM136A	FAM136A	808	sp|Q96C01|F136A_HUMAN Protein FAM136A OS=Homo sapiens OX=9606 GN=FAM136A PE=1 SV=1;tr|E7EQY1|E7EQY1_HUMAN Protein FAM136A OS=Homo sapiens OX=9606 GN=FAM136A PE=1 SV=1;tr|C9J2Y4|C9J2Y4_HUMAN Protein FAM136A OS=Homo sapiens OX=9606 GN=FAM136A PE=1 SV=1
NaN	25.67	24.704	25.6641	26.5905	NaN	25.1996	25.6536	NaN	25.8855	NaN	25.856	26.2348	NaN	NaN			2	2	2	9.4	9.4	9.4	23.499	0	7.564	457610000	28	25.7176	25.6572	25.5796	26.0454	9	4	3	2	0.879327	0.077617	0.159756	A0A3B3ISV4;Q8N0U8	A0A3B3ISV4;Q8N0U8	Vitamin K epoxide reductase complex subunit 1-like protein 1	VKORC1L1	359	tr|A0A3B3ISV4|A0A3B3ISV4_HUMAN Vitamin-K-epoxide reductase (warfarin-sensitive) OS=Homo sapiens OX=9606 GN=VKORC1L1 PE=1 SV=1;sp|Q8N0U8|VKORL_HUMAN Vitamin K epoxide reductase complex subunit 1-like protein 1 OS=Homo sapiens OX=9606 GN=VKORC1L1 PE=1 SV=2
26.7179	25.7446	27.0808	26.3925	NaN	NaN	27.1122	25.8208	26.2186	NaN	NaN	NaN	NaN	NaN	NaN			6	6	6	18.6	18.6	18.6	43.294	0	31.054	768230000	16	26.4411	26.484	26.3839	NaN	7	4	3	0	0.837551	0.100079	0.215962	B6VEX4;A0A0A0MRT6;Q8IZP0	B6VEX4;A0A0A0MRT6;Q8IZP0	Abl interactor 1	ABI1	140	tr|B6VEX4|B6VEX4_HUMAN Abl interactor 1 OS=Homo sapiens OX=9606 GN=ABI1 PE=1 SV=1;tr|A0A0A0MRT6|A0A0A0MRT6_HUMAN Abl interactor 1 OS=Homo sapiens OX=9606 GN=ABI1 PE=1 SV=1;sp|Q8IZP0|ABI1_HUMAN Abl interactor 1 OS=Homo sapiens OX=9606 GN=ABI1 PE=1 SV=4
25.4447	26.2751	25.9634	NaN	26.0109	NaN	25.7477	NaN	25.8831	25.8394	NaN	NaN	25.1762	25.4745	NaN			3	3	3	24.2	24.2	24.2	29.408	0	8.6461	597550000	26	25.7572	25.9235	25.8234	25.3253	9	4	3	2	0.650899	0.100138	0.480892	A0A0G2JMS5;A0A087WU62;A0A087X2D5;Q9BRJ2	A0A0G2JMS5;A0A087WU62;A0A087X2D5;Q9BRJ2	39S ribosomal protein L45, mitochondrial	MRPL45	26	tr|A0A0G2JMS5|A0A0G2JMS5_HUMAN 39S ribosomal protein L45, mitochondrial OS=Homo sapiens OX=9606 GN=MRPL45 PE=1 SV=1;tr|A0A087WU62|A0A087WU62_HUMAN 39S ribosomal protein L45, mitochondrial OS=Homo sapiens OX=9606 GN=MRPL45 PE=1 SV=1;tr|A0A087X2D5|A0A087X2D5
26.4541	26.7574	26.7886	NaN	26.7475	NaN	26.6094	26.6244	NaN	26.2868	NaN	NaN	NaN	NaN	NaN			4	4	4	15.8	15.8	15.8	25.104	0	141.22	763030000	24	26.6097	26.6869	26.5068	NaN	7	4	3	0	0.226091	0.180061	1.38004	O43633;M0R1T5;M0R1L7;M0QXX8	O43633;M0R1T5;M0R1L7	Charged multivesicular body protein 2a	CHMP2A	1411	sp|O43633|CHM2A_HUMAN Charged multivesicular body protein 2a OS=Homo sapiens OX=9606 GN=CHMP2A PE=1 SV=1;tr|M0R1T5|M0R1T5_HUMAN Charged multivesicular body protein 2a (Fragment) OS=Homo sapiens OX=9606 GN=CHMP2A PE=1 SV=1;tr|M0R1L7|M0R1L7_HUMAN Charged mul
27.169	26.9626	26.6665	NaN	27.7808	NaN	27.6625	26.8093	NaN	26.1467	NaN	NaN	NaN	NaN	NaN			8	8	8	33.5	33.5	33.5	54.461	0	111.13	915020000	24	27.0282	27.1447	26.8728	NaN	7	4	3	0	0.581027	0.27188	0.589704	P46937;H0YCI3	P46937	Transcriptional coactivator YAP1	YAP1	2162	sp|P46937|YAP1_HUMAN Transcriptional coactivator YAP1 OS=Homo sapiens OX=9606 GN=YAP1 PE=1 SV=2
25.185	25.2447	25.3327	NaN	25.1315	NaN	25.2481	24.6622	24.8452	NaN	NaN	NaN	NaN	NaN	NaN			3	3	3	19	19	19	28.16	0	26.845	408390000	21	25.0928	25.2235	24.9185	NaN	7	4	3	0	0.103724	0.304978	1.98641	Q96S44;Q5JZ02	Q96S44;Q5JZ02	TP53-regulating kinase	TP53RK	3329	sp|Q96S44|PRPK_HUMAN EKC/KEOPS complex subunit TP53RK OS=Homo sapiens OX=9606 GN=TP53RK PE=1 SV=2;tr|Q5JZ02|Q5JZ02_HUMAN Non-specific serine/threonine protein kinase OS=Homo sapiens OX=9606 GN=TP53RK PE=1 SV=1
24.4075	23.2544	23.6493	NaN	23.0023	22.9425	23.6442	NaN	23.029	NaN	NaN	NaN	NaN	NaN	NaN			5	5	5	15	15	15	51.419	0	14.385	104280000	16	23.4184	23.5784	23.2052	NaN	7	4	3	0	0.401638	0.373153	0.916102	Q13418;A0A0A0MTH3;A0A087WWY6	Q13418;A0A0A0MTH3	Integrin-linked protein kinase	ILK	161	sp|Q13418|ILK_HUMAN Integrin-linked protein kinase OS=Homo sapiens OX=9606 GN=ILK PE=1 SV=2;tr|A0A0A0MTH3|A0A0A0MTH3_HUMAN Integrin-linked protein kinase OS=Homo sapiens OX=9606 GN=ILK PE=1 SV=1
25.8723	25.7159	26.5767	NaN	26.3521	NaN	25.6271	25.0439	NaN	26.4811	NaN	NaN	NaN	NaN	NaN			7	7	7	17.4	17.4	17.4	52.916	0	16.684	569590000	17	25.9527	26.1292	25.7173	NaN	7	4	3	0	0.374635	0.411895	0.974342	P0CG08;B7ZAQ6;A0A087WW78;A0A087WW82;U3KPV2;E9PKY3	P0CG08;B7ZAQ6;A0A087WW78;A0A087WW82;U3KPV2;E9PKY3	Golgi pH regulator B;Golgi pH regulator A	GPR89B;GPR89A	559	sp|P0CG08|GPHRB_HUMAN Golgi pH regulator B OS=Homo sapiens OX=9606 GN=GPR89B PE=1 SV=1;sp|B7ZAQ6|GPHRA_HUMAN Golgi pH regulator A OS=Homo sapiens OX=9606 GN=GPR89A PE=1 SV=2;tr|A0A087WW78|A0A087WW78_HUMAN Golgi pH regulator B (Fragment) OS=Homo sapiens OX=
NaN	26.8395	27.0423	27.5379	27.381	26.9384	26.6404	NaN	NaN	26.627	27.9163	27.1943	27.965	27.708	NaN			4	4	2	19.6	19.6	8	24.784	0	17.293	1236200000	47	27.2537	27.2002	26.7353	27.6959	11	4	3	4	0.0736518	0.46491	2.25674	C9JYN0;A0A0U1RQT9;H7C4J8	C9JYN0		SYPL1	637	tr|C9JYN0|C9JYN0_HUMAN Synaptophysin-like protein 1 OS=Homo sapiens OX=9606 GN=SYPL1 PE=1 SV=1
24.7589	24.6605	NaN	25.9658	25.1613	NaN	24.7044	NaN	24.5063	24.6839	25.5498	NaN	25.2403	NaN	NaN			5	5	4	17.3	17.3	13.4	47.036	0	42.597	297390000	23	25.0257	25.1366	24.6315	25.3951	9	4	3	2	0.214259	0.505091	1.42212	P12532;F8WCN3;C9JSQ1;C9JJX8;C9J995;C9J8F6	P12532;F8WCN3	Creatine kinase U-type, mitochondrial	CKMT1A;CKMT1B	1792	sp|P12532|KCRU_HUMAN Creatine kinase U-type, mitochondrial OS=Homo sapiens OX=9606 GN=CKMT1A PE=1 SV=1;tr|F8WCN3|F8WCN3_HUMAN Creatine kinase OS=Homo sapiens OX=9606 GN=CKMT1A PE=1 SV=1
24.6494	24.8904	24.9515	NaN	25.2334	NaN	24.8315	24.3972	NaN	23.8424	NaN	NaN	NaN	NaN	NaN			5	5	5	12.9	12.9	12.9	65.601	0	13.976	297450000	11	24.6851	24.9312	24.357	NaN	7	4	3	0	0.0941632	0.574146	2.06225	Q13123;D6REL4;E7EQZ7;D6RAY9	Q13123;D6REL4;E7EQZ7	Protein Red	IK	2577	sp|Q13123|RED_HUMAN Protein Red OS=Homo sapiens OX=9606 GN=IK PE=1 SV=3;tr|D6REL4|D6REL4_HUMAN Protein Red (Fragment) OS=Homo sapiens OX=9606 GN=IK PE=1 SV=6;tr|E7EQZ7|E7EQZ7_HUMAN Protein Red (Fragment) OS=Homo sapiens OX=9606 GN=IK PE=1 SV=1
24.708	NaN	24.8061	NaN	24.4562	NaN	25.5801	25.2721	NaN	25.0918	NaN	24.8452	24.6583	24.3928	NaN	+	3NT_Control	4	4	4	18.5	18.5	18.5	47.219	0	21.556	222500000	17	24.8679	24.6568	25.3147	24.6321	9	3	3	3	0.0203733	-0.657925	-3.72569	Q14653;M0QYT9;M0R205;M0QZB8;M0QZB7;M0R0R8;M0R0X9;M0QXC8;M0R3C2;M0R007;M0QX56;M0R3E9;M0QYX3	Q14653;M0QYT9;M0R205;M0QZB8;M0QZB7;M0R0R8;M0R0X9;M0QXC8;M0R3C2	Interferon regulatory factor 3	IRF3	2675	sp|Q14653|IRF3_HUMAN Interferon regulatory factor 3 OS=Homo sapiens OX=9606 GN=IRF3 PE=1 SV=1;tr|M0QYT9|M0QYT9_HUMAN Interferon regulatory factor 3 OS=Homo sapiens OX=9606 GN=IRF3 PE=1 SV=1;tr|M0R205|M0R205_HUMAN Interferon regulatory factor 3 (Fragment) O
NaN	26.276	26.1542	NaN	26.4369	NaN	NaN	26.0645	25.9273	25.9269	26.2703	26.9489	26.2147	26.1049	NaN	+	3NT_Control	6	6	3	8.1	8.1	3.9	92.386	0	73.872	567950000	22	26.2324	26.289	25.9729	26.3847	10	3	3	4	0.0280427	0.316127	3.37004	E9PSI1;E9PQI5;E9PJC4;E9PQ80;E9PQY7;E9PS99;E9PL78;E9PJM1;E9PMQ9;O15321;E9PNW2;G3V1B9	E9PSI1;E9PQI5;E9PJC4;E9PQ80;E9PQY7;E9PS99;E9PL78;E9PJM1;E9PMQ9;O15321	Transmembrane 9 superfamily member 1	CHMP4A;TM9SF1	916	tr|E9PSI1|E9PSI1_HUMAN Transmembrane 9 superfamily member OS=Homo sapiens OX=9606 PE=3 SV=1;tr|E9PQI5|E9PQI5_HUMAN Charged multivesicular body protein 4a OS=Homo sapiens OX=9606 GN=CHMP4A PE=1 SV=2;tr|E9PJC4|E9PJC4_HUMAN Transmembrane 9 superfamily member
NaN	25.0582	24.6174	NaN	24.8428	26.7662	24.5397	NaN	NaN	24.9012	26.9872	26.1092	26.5777	26.8904	NaN			5	5	5	14.6	14.6	14.6	51.887	0	43.024	571500000	24	25.729	24.8395	25.4024	26.6411	10	3	3	4	0.46725	-0.562929	-0.802471	Q9Y646;E5RH35;E5RJZ7;E5RJP8;E5RJA8	Q9Y646;E5RH35;E5RJZ7;E5RJP8;E5RJA8	Carboxypeptidase Q	CPQ	3938	sp|Q9Y646|CBPQ_HUMAN Carboxypeptidase Q OS=Homo sapiens OX=9606 GN=CPQ PE=1 SV=1;tr|E5RH35|E5RH35_HUMAN Carboxypeptidase Q (Fragment) OS=Homo sapiens OX=9606 GN=CPQ PE=1 SV=1;tr|E5RJZ7|E5RJZ7_HUMAN Carboxypeptidase Q (Fragment) OS=Homo sapiens OX=9606 GN=C
23.8091	24.0995	23.4151	NaN	NaN	24.4981	24.3348	NaN	NaN	24.0483	NaN	NaN	NaN	NaN	NaN			3	3	3	17.7	17.7	17.7	31.716	0	12.94	164460000	12	24.0342	23.7746	24.2938	NaN	6	3	3	0	0.0945273	-0.519197	-2.18205	Q99943	Q99943	1-acyl-sn-glycerol-3-phosphate acyltransferase alpha	AGPAT1	3377	sp|Q99943|PLCA_HUMAN 1-acyl-sn-glycerol-3-phosphate acyltransferase alpha OS=Homo sapiens OX=9606 GN=AGPAT1 PE=1 SV=2
25.5125	25.5095	NaN	NaN	25.6686	NaN	26.1887	NaN	25.8409	25.7349	NaN	NaN	NaN	NaN	NaN			6	6	6	23.5	23.5	23.5	33.31	0	22.061	436980000	16	25.7425	25.5635	25.9215	NaN	6	3	3	0	0.0712851	-0.357997	-2.439	P55212;D6RBM3;D6RHU3	P55212	Caspase-6;Caspase-6 subunit p18;Caspase-6 subunit p11	CASP6	2304	sp|P55212|CASP6_HUMAN Caspase-6 OS=Homo sapiens OX=9606 GN=CASP6 PE=1 SV=2
26.5166	26.2184	NaN	NaN	25.2163	NaN	NaN	26.5785	26.6584	25.7622	26.4977	NaN	NaN	NaN	NaN			2	2	2	2.2	2.2	2.2	99.666	0.0018687	2.6081	828910000	36	26.2069	25.9837	26.333	26.4977	7	3	3	1	0.512467	-0.349277	-0.717984	A0A087WXZ7;K7EIX2;Q6AI08;K7ELR8	A0A087WXZ7;K7EIX2;Q6AI08;K7ELR8	HEAT repeat-containing protein 6	HEATR6	65	tr|A0A087WXZ7|A0A087WXZ7_HUMAN HEAT repeat-containing protein 6 OS=Homo sapiens OX=9606 GN=HEATR6 PE=1 SV=1;tr|K7EIX2|K7EIX2_HUMAN HEAT repeat-containing protein 6 OS=Homo sapiens OX=9606 GN=HEATR6 PE=1 SV=1;sp|Q6AI08|HEAT6_HUMAN HEAT repeat-containing pro
25.0434	NaN	25.7648	NaN	25.8595	25.5298	NaN	NaN	26.1435	25.9998	25.0138	25.7602	25.335	25.8192	NaN			10	2	2	53.8	10.4	10.4	24.235	0	47.02	468690000	20	25.6269	25.5559	25.891	25.4821	10	3	3	4	0.350636	-0.335129	-1.05573	C9JNZ1;C9JVG3;C9JWG0;C9JTZ5;C9JUW1;F2Z3H1;C9J3M0;F2Z3P4;F8WC70	C9JNZ1;C9JVG3;C9JWG0;C9JTZ5;C9JUW1		UGP2	628	tr|C9JNZ1|C9JNZ1_HUMAN UTP--glucose-1-phosphate uridylyltransferase (Fragment) OS=Homo sapiens OX=9606 GN=UGP2 PE=1 SV=8;tr|C9JVG3|C9JVG3_HUMAN UTP--glucose-1-phosphate uridylyltransferase (Fragment) OS=Homo sapiens OX=9606 GN=UGP2 PE=1 SV=8;tr|C9JWG0|C9JW
24.9456	24.495	24.7668	NaN	NaN	NaN	25.0242	25.6498	NaN	24.4749	NaN	NaN	NaN	NaN	NaN			5	5	5	29.6	29.6	29.6	30.188	0	14.691	327470000	11	24.8927	24.7358	25.0496	NaN	6	3	3	0	0.436933	-0.313875	-0.862748	P29218;E5RIP7;H0YBL1;E5RG94;E5RHE9;E5RI82;E5RGY4;E5RIF4;E5RG13	P29218;E5RIP7;H0YBL1;E5RG94;E5RHE9;E5RI82;E5RGY4	Inositol monophosphatase 1	IMPA1	1985	sp|P29218|IMPA1_HUMAN Inositol monophosphatase 1 OS=Homo sapiens OX=9606 GN=IMPA1 PE=1 SV=1;tr|E5RIP7|E5RIP7_HUMAN Inositol-1-monophosphatase (Fragment) OS=Homo sapiens OX=9606 GN=IMPA1 PE=1 SV=8;tr|H0YBL1|H0YBL1_HUMAN Inositol-1-monophosphatase (Fragment)
NaN	NaN	24.6394	23.5877	25.2058	24.6742	NaN	25.1008	NaN	24.5707	NaN	NaN	NaN	NaN	NaN			4	4	4	19.7	19.7	19.7	29.622	0	4.86	300420000	11	24.6298	24.4776	24.7819	NaN	6	3	3	0	0.576471	-0.304255	-0.607246	Q9H9Q2;J3KQ34;J3KQ41;A0A087X1P5;J3KQV6;J3QT67;J3QT66;J3QT69;J3QT50;J3QT43;J3QT95;J3QT73	Q9H9Q2;J3KQ34;J3KQ41;A0A087X1P5	COP9 signalosome complex subunit 7b	COPS7B	3559	sp|Q9H9Q2|CSN7B_HUMAN COP9 signalosome complex subunit 7b OS=Homo sapiens OX=9606 GN=COPS7B PE=1 SV=1;tr|J3KQ34|J3KQ34_HUMAN COP9 signalosome complex subunit 7b OS=Homo sapiens OX=9606 GN=COPS7B PE=1 SV=1;tr|J3KQ41|J3KQ41_HUMAN COP9 signalosome complex sub
NaN	25.6505	25.0197	NaN	25.363	25.664	NaN	25.4996	NaN	25.6819	25.8654	26.1032	26.2485	NaN	NaN			6	6	6	18.3	18.3	18.3	60.044	0	24.235	669740000	22	25.6773	25.3444	25.6152	26.0724	9	3	3	3	0.229888	-0.270787	-1.41536	A0A5F9ZHX8;F5H324;A0A5F9ZHZ5;F5GYY5;P51690	A0A5F9ZHX8;F5H324;A0A5F9ZHZ5;F5GYY5;P51690	Arylsulfatase E	ARSE	408	tr|A0A5F9ZHX8|A0A5F9ZHX8_HUMAN Arylsulfatase L OS=Homo sapiens OX=9606 GN=ARSL PE=1 SV=1;tr|F5H324|F5H324_HUMAN Arylsulfatase L OS=Homo sapiens OX=9606 GN=ARSL PE=1 SV=1;tr|A0A5F9ZHZ5|A0A5F9ZHZ5_HUMAN Arylsulfatase L OS=Homo sapiens OX=9606 GN=ARSL PE=1 SV
25.5886	NaN	25.0532	NaN	24.7532	NaN	25.5596	25.2149	NaN	25.4243	NaN	NaN	NaN	NaN	NaN			3	3	3	10.7	10.7	10.7	42.882	0	36.588	443180000	13	25.2656	25.1317	25.3996	NaN	6	3	3	0	0.367692	-0.267947	-1.01457	A0A0A0MSA9;A0A0C4DG49;P15151	A0A0A0MSA9;A0A0C4DG49;P15151	Poliovirus receptor	PVR	145	tr|A0A0A0MSA9|A0A0A0MSA9_HUMAN Poliovirus receptor OS=Homo sapiens OX=9606 GN=PVR PE=1 SV=1;tr|A0A0C4DG49|A0A0C4DG49_HUMAN Poliovirus receptor OS=Homo sapiens OX=9606 GN=PVR PE=1 SV=1;sp|P15151|PVR_HUMAN Poliovirus receptor OS=Homo sapiens OX=9606 GN=PVR P
NaN	25.1638	25.5199	NaN	25.3474	NaN	25.7314	25.6283	NaN	25.3952	NaN	NaN	NaN	NaN	NaN			4	4	4	13.4	13.4	13.4	48.602	0	7.2242	297570000	10	25.4643	25.3437	25.585	NaN	6	3	3	0	0.166952	-0.241253	-1.68662	Q8WU90;F8WB26	Q8WU90	Zinc finger CCCH domain-containing protein 15	ZC3H15	3140	sp|Q8WU90|ZC3HF_HUMAN Zinc finger CCCH domain-containing protein 15 OS=Homo sapiens OX=9606 GN=ZC3H15 PE=1 SV=1
24.071	23.4574	NaN	NaN	23.0951	23.4655	24.1493	NaN	NaN	23.6368	NaN	NaN	NaN	NaN	NaN			2	2	2	5.4	5.4	5.4	65.523	0	9.0973	117490000	8	23.6458	23.5411	23.7505	NaN	6	3	3	0	0.583111	-0.209378	-0.596251	Q5T2T1;U5GXS2;S4R337	Q5T2T1;U5GXS2;S4R337	MAGUK p55 subfamily member 7	MPP7	2850	sp|Q5T2T1|MPP7_HUMAN MAGUK p55 subfamily member 7 OS=Homo sapiens OX=9606 GN=MPP7 PE=1 SV=1;tr|U5GXS2|U5GXS2_HUMAN MAGUK p55 subfamily member 7 (Fragment) OS=Homo sapiens OX=9606 GN=MPP7 PE=1 SV=1;tr|S4R337|S4R337_HUMAN MAGUK p55 subfamily member 7 OS=Homo
24.5667	NaN	24.5421	NaN	24.8091	NaN	NaN	24.8232	25.0622	24.4702	NaN	24.4789	24.6287	24.3835	NaN			4	4	4	17.3	17.3	17.3	36.426	0	20.629	213930000	19	24.6405	24.6393	24.7852	24.497	9	3	3	3	0.489452	-0.145878	-0.760246	Q9NPF4;G3V445;G3V249	Q9NPF4;G3V445	Probable tRNA N6-adenosine threonylcarbamoyltransferase	OSGEP	3603	sp|Q9NPF4|OSGEP_HUMAN Probable tRNA N6-adenosine threonylcarbamoyltransferase OS=Homo sapiens OX=9606 GN=OSGEP PE=1 SV=1;tr|G3V445|G3V445_HUMAN N6-L-threonylcarbamoyladenine synthase (Fragment) OS=Homo sapiens OX=9606 GN=OSGEP PE=1 SV=8
25.5698	NaN	25.0149	25.3558	NaN	NaN	25.3128	25.7292	NaN	25.2902	27.2154	25.8951	25.8987	25.3572	NaN			4	4	4	38.7	38.7	38.7	16.713	0	25.043	488700000	28	25.6639	25.3135	25.444	26.0916	10	3	3	4	0.577382	-0.13058	-0.605732	P60983;G3V4P8;G3V3X4	P60983;G3V4P8	Glia maturation factor beta	GMFB	1030	sp|P60983|GMFB_HUMAN Glia maturation factor beta OS=Homo sapiens OX=9606 GN=GMFB PE=1 SV=2;tr|G3V4P8|G3V4P8_HUMAN Glia maturation factor beta (Fragment) OS=Homo sapiens OX=9606 GN=GMFB PE=1 SV=1
25.4683	NaN	25.3557	NaN	25.3283	NaN	25.4469	25.5076	NaN	25.5005	NaN	24.9213	NaN	24.6253	NaN			2	2	2	12.4	12.4	12.4	25.321	0	14.983	320720000	10	25.2693	25.3841	25.485	24.7733	8	3	3	2	0.0979943	-0.100881	-2.14988	Q8NCR9	Q8NCR9	Clarin-3	CLRN3	3084	sp|Q8NCR9|CLRN3_HUMAN Clarin-3 OS=Homo sapiens OX=9606 GN=CLRN3 PE=2 SV=1
25.4132	NaN	25.1037	NaN	24.6732	NaN	25.446	25.1282	NaN	24.83	NaN	NaN	NaN	NaN	NaN			4	4	4	19.2	19.2	19.2	34.404	0	31.053	346340000	11	25.0991	25.0634	25.1347	NaN	6	3	3	0	0.810565	-0.0713558	-0.256017	O75569;F8WEG8;G5E9Q4;C9JMM3	O75569;F8WEG8;G5E9Q4;C9JMM3	Interferon-inducible double-stranded RNA-dependent protein kinase activator A	PRKRA	1501	sp|O75569|PRKRA_HUMAN Interferon-inducible double-stranded RNA-dependent protein kinase activator A OS=Homo sapiens OX=9606 GN=PRKRA PE=1 SV=1;tr|F8WEG8|F8WEG8_HUMAN Interferon-inducible double-stranded RNA-dependent protein kinase activator A OS=Homo sapi
25.7355	25.2886	NaN	NaN	24.7797	NaN	25.4159	25.5486	25.0261	NaN	NaN	NaN	NaN	NaN	NaN			3	3	3	19.9	19.9	19.9	28.235	0	23.789	309220000	13	25.2991	25.2679	25.3302	NaN	6	3	3	0	0.854115	-0.062259	-0.196068	Q5RKV6	Q5RKV6	Exosome complex component MTR3	EXOSC6	2839	sp|Q5RKV6|EXOS6_HUMAN Exosome complex component MTR3 OS=Homo sapiens OX=9606 GN=EXOSC6 PE=1 SV=1
24.9515	NaN	24.7586	NaN	25.0276	NaN	25.0079	24.9797	NaN	24.9325	NaN	NaN	NaN	NaN	NaN			7	7	7	14.6	14.6	14.6	89.257	0	17.112	242260000	15	24.943	24.9126	24.9733	NaN	6	3	3	0	0.50482	-0.0607592	-0.731867	Q8N3E9;F5GXC1;K7EQF2;H0YGF8	Q8N3E9	1-phosphatidylinositol 4,5-bisphosphate phosphodiesterase delta-3	PLCD3	3047	sp|Q8N3E9|PLCD3_HUMAN 1-phosphatidylinositol 4,5-bisphosphate phosphodiesterase delta-3 OS=Homo sapiens OX=9606 GN=PLCD3 PE=1 SV=3
25.1935	24.7561	24.9208	NaN	NaN	NaN	25.18	25.0282	NaN	24.8425	NaN	NaN	NaN	NaN	NaN			4	4	3	12.1	12.1	9.9	52.44	0	14.134	219390000	10	24.9869	24.9568	25.0169	NaN	6	3	3	0	0.727288	-0.0600802	-0.37414	P51608;A0A087X1U4;A0A087WVW7;I6LM39;A0A1B0GTV0;A0A0D9SFX7	P51608;A0A087X1U4;A0A087WVW7;I6LM39	Methyl-CpG-binding protein 2	MECP2	2247	sp|P51608|MECP2_HUMAN Methyl-CpG-binding protein 2 OS=Homo sapiens OX=9606 GN=MECP2 PE=1 SV=1;tr|A0A087X1U4|A0A087X1U4_HUMAN Methyl-CpG-binding protein 2 OS=Homo sapiens OX=9606 GN=MECP2 PE=1 SV=1;tr|A0A087WVW7|A0A087WVW7_HUMAN Methyl-CpG-binding protein 2
25.0841	24.8865	24.9032	NaN	NaN	NaN	25.0563	24.8724	NaN	25.0586	NaN	NaN	NaN	NaN	NaN			3	3	3	11.3	11.3	11.3	40.47	0	6.8654	273670000	13	24.9768	24.9579	24.9958	NaN	6	3	3	0	0.69047	-0.0378475	-0.428327	H0Y9G6;E7ETU7;P09001;E9PF06;D6RC14	H0Y9G6;E7ETU7;P09001;E9PF06	39S ribosomal protein L3, mitochondrial	MRPL3	817	tr|H0Y9G6|H0Y9G6_HUMAN 39S ribosomal protein L3, mitochondrial (Fragment) OS=Homo sapiens OX=9606 GN=MRPL3 PE=1 SV=1;tr|E7ETU7|E7ETU7_HUMAN 39S ribosomal protein L3, mitochondrial OS=Homo sapiens OX=9606 GN=MRPL3 PE=1 SV=1;sp|P09001|RM03_HUMAN 39S ribosoma
25.3664	NaN	25.4489	NaN	25.5137	NaN	25.4676	NaN	25.4377	25.4476	NaN	NaN	NaN	NaN	NaN			6	6	6	20.1	20.1	20.1	42.451	0	12.537	278350000	12	25.447	25.443	25.451	NaN	6	3	3	0	0.863765	-0.00796064	-0.182911	U3KPX3;A0A590UJ43;P48729;D6REM4;A0A5F9W493;E7ETM0;U3KQ83;A0A590UK94;H0Y9X2;U3KQK7;Q8N752;A0A590UJQ7;E5RG27;D6RGE5	U3KPX3;A0A590UJ43;P48729;D6REM4;A0A5F9W493;E7ETM0	Casein kinase I isoform alpha	CSNK1A1	396	tr|U3KPX3|U3KPX3_HUMAN Casein kinase I isoform alpha OS=Homo sapiens OX=9606 GN=CSNK1A1 PE=1 SV=2;tr|A0A590UJ43|A0A590UJ43_HUMAN Casein kinase I isoform alpha OS=Homo sapiens OX=9606 GN=CSNK1A1 PE=1 SV=1;sp|P48729|KC1A_HUMAN Casein kinase I isoform alpha O
NaN	26.4885	25.1999	NaN	26.5188	NaN	25.9695	26.1297	NaN	26.0637	NaN	NaN	NaN	NaN	NaN			3	3	3	9.7	9.7	9.7	42.668	0	15.046	761040000	30	26.0617	26.0691	26.0543	NaN	6	3	3	0	0.974693	0.014754	0.03375	B5MDU6;Q9H6V9;B5MCE2;B4DRG3;C9JHU6;C9JUM0;B5MCU4;A0A0A0MSH6	B5MDU6;Q9H6V9;B5MCE2;B4DRG3	UPF0554 protein C2orf43	LDAH;C2orf43;FLJ21820	543	tr|B5MDU6|B5MDU6_HUMAN Lipid droplet-associated hydrolase OS=Homo sapiens OX=9606 GN=LDAH PE=1 SV=1;sp|Q9H6V9|LDAH_HUMAN Lipid droplet-associated hydrolase OS=Homo sapiens OX=9606 GN=LDAH PE=1 SV=1;tr|B5MCE2|B5MCE2_HUMAN Lipid droplet-associated hydrolase
24.9386	NaN	24.829	25.1041	NaN	NaN	25.0876	24.8148	NaN	24.9131	NaN	NaN	NaN	NaN	NaN			3	3	3	12.3	12.3	12.3	43.182	0	14.218	228020000	8	24.9479	24.9572	24.9385	NaN	6	3	3	0	0.876251	0.0187397	0.165944	Q8IXJ6;F8WF57;F8WDM4;C9JR33;C9J3U7;F8WCF4;C9JZQ0;B5MCS1;A0A0A0MRF5;E7EWX6;A0A087WYM3	Q8IXJ6;F8WF57;F8WDM4;C9JR33;C9J3U7;F8WCF4;C9JZQ0;B5MCS1;A0A0A0MRF5;E7EWX6;A0A087WYM3	NAD-dependent protein deacetylase sirtuin-2	SIRT2	3020	sp|Q8IXJ6|SIR2_HUMAN NAD-dependent protein deacetylase sirtuin-2 OS=Homo sapiens OX=9606 GN=SIRT2 PE=1 SV=2;tr|F8WF57|F8WF57_HUMAN NAD-dependent protein deacetylase sirtuin-2 OS=Homo sapiens OX=9606 GN=SIRT2 PE=1 SV=1;tr|F8WDM4|F8WDM4_HUMAN NAD-dependent p
NaN	NaN	25.9668	26.2264	25.9413	NaN	25.9435	NaN	26.0506	26.0809	NaN	NaN	NaN	NaN	NaN			5	5	5	9	9	9	73.301	0	13.828	343070000	13	26.0349	26.0448	26.025	NaN	6	3	3	0	0.852968	0.0197957	0.197634	Q8WWI5	Q8WWI5	Choline transporter-like protein 1	SLC44A1	3158	sp|Q8WWI5|CTL1_HUMAN Choline transporter-like protein 1 OS=Homo sapiens OX=9606 GN=SLC44A1 PE=1 SV=1
24.9479	NaN	24.7942	NaN	24.4352	NaN	24.6401	NaN	24.6301	24.815	NaN	NaN	NaN	NaN	NaN			5	5	5	7.1	7.1	7.1	100.83	0	11.533	228050000	8	24.7104	24.7257	24.6951	NaN	6	3	3	0	0.860261	0.0306562	0.187683	Q01780;K7EJ37	Q01780	Exosome component 10	EXOSC10	2485	sp|Q01780|EXOSX_HUMAN Exosome component 10 OS=Homo sapiens OX=9606 GN=EXOSC10 PE=1 SV=2
NaN	25.2157	24.9748	NaN	24.7861	24.7752	NaN	NaN	25.0095	25.0729	24.959	25.1337	25.7894	25.386	NaN			7	7	7	8.8	8.8	8.8	119.7	0	26.389	315510000	29	25.1102	24.9922	24.9525	25.317	10	3	3	4	0.809142	0.0396805	0.257993	Q8IZL8;C9JFV4;E7EV54;I3L445;I3L4P1;I3L1P4;I3L4M7	Q8IZL8;C9JFV4;E7EV54;I3L445	Proline-, glutamic acid- and leucine-rich protein 1	PELP1	3032	sp|Q8IZL8|PELP1_HUMAN Proline-, glutamic acid- and leucine-rich protein 1 OS=Homo sapiens OX=9606 GN=PELP1 PE=1 SV=2;tr|C9JFV4|C9JFV4_HUMAN Modulator of non-genomic activity of estrogen receptor OS=Homo sapiens OX=9606 GN=PELP1 PE=1 SV=2;tr|E7EV54|E7EV54_H
25.2501	25.2365	25.0277	NaN	NaN	NaN	25.2542	24.9961	NaN	25.1093	NaN	NaN	NaN	NaN	NaN			5	5	5	14.5	14.5	14.5	49.296	0	26.457	430210000	22	25.1456	25.1714	25.1199	NaN	6	3	3	0	0.645081	0.0515842	0.497285	M0R3C8;Q96T60;A0A0D9SFL2;M0QYH2;M0QYI1;A0A0D9SFD6;A0A0D9SEV0;M0R000	M0R3C8;Q96T60;A0A0D9SFL2;M0QYH2;M0QYI1;A0A0D9SFD6	Bifunctional polynucleotide phosphatase/kinase;Polynucleotide 3-phosphatase;Polynucleotide 5-hydroxyl-kinase	PNKP	1281	tr|M0R3C8|M0R3C8_HUMAN Bifunctional polynucleotide phosphatase/kinase OS=Homo sapiens OX=9606 GN=PNKP PE=1 SV=1;sp|Q96T60|PNKP_HUMAN Bifunctional polynucleotide phosphatase/kinase OS=Homo sapiens OX=9606 GN=PNKP PE=1 SV=1;tr|A0A0D9SFL2|A0A0D9SFL2_HUMAN Bif
25.0496	25.0501	25.8294	NaN	NaN	NaN	24.5022	NaN	25.7574	25.415	NaN	NaN	25.8705	26.3669	NaN			2	2	2	6.5	6.5	6.5	52.518	0	6.2925	324620000	17	25.4802	25.3097	25.2249	26.1187	8	3	3	2	0.861419	0.0848465	0.186106	Q9BT22;K7EID2;K7EPU3	Q9BT22;K7EID2;K7EPU3	Chitobiosyldiphosphodolichol beta-mannosyltransferase	ALG1	3409	sp|Q9BT22|ALG1_HUMAN Chitobiosyldiphosphodolichol beta-mannosyltransferase OS=Homo sapiens OX=9606 GN=ALG1 PE=1 SV=2;tr|K7EID2|K7EID2_HUMAN Chitobiosyldiphosphodolichol beta-mannosyltransferase (Fragment) OS=Homo sapiens OX=9606 GN=ALG1 PE=1 SV=8;tr|K7EPU3
25.1252	24.9095	NaN	NaN	24.8349	NaN	24.7825	24.8371	24.9415	NaN	NaN	NaN	NaN	NaN	NaN			7	7	7	13.1	13.1	13.1	82.921	0	40.799	290480000	18	24.9051	24.9565	24.8537	NaN	6	3	3	0	0.356512	0.10283	1.04135	Q12996;E9PLP8;E9PJ06;H0YE74	Q12996;E9PLP8	Cleavage stimulation factor subunit 3	CSTF3	2569	sp|Q12996|CSTF3_HUMAN Cleavage stimulation factor subunit 3 OS=Homo sapiens OX=9606 GN=CSTF3 PE=1 SV=1;tr|E9PLP8|E9PLP8_HUMAN Cleavage stimulation factor subunit 3 OS=Homo sapiens OX=9606 GN=CSTF3 PE=1 SV=2
25.6495	25.2691	26.1724	NaN	NaN	NaN	25.7224	25.2196	NaN	25.6188	NaN	NaN	NaN	NaN	NaN			9	9	9	25.3	25.3	25.3	61.381	0	26.555	650170000	25	25.6086	25.697	25.5203	NaN	6	3	3	0	0.591426	0.176767	0.582597	I3L4C2;Q9UQB8;B4DWA1;I3L2M4;I3L125;I3L327;I3L1C8;I3L3C6;I3L526;I3L2J6;I3L113;I3L4A3;I3L0Y9;I3L0M4;I3L3J7;I3L3C5	I3L4C2;Q9UQB8;B4DWA1;I3L2M4	Brain-specific angiogenesis inhibitor 1-associated protein 2	BAIAP2	1178	tr|I3L4C2|I3L4C2_HUMAN Brain-specific angiogenesis inhibitor 1-associated protein 2 OS=Homo sapiens OX=9606 GN=BAIAP2 PE=1 SV=1;sp|Q9UQB8|BAIP2_HUMAN Brain-specific angiogenesis inhibitor 1-associated protein 2 OS=Homo sapiens OX=9606 GN=BAIAP2 PE=1 SV=1;t
24.8783	25.2869	24.8205	NaN	NaN	NaN	NaN	24.8468	24.7098	24.8965	NaN	24.6517	NaN	24.0772	NaN			2	2	2	5	5	5	66.898	0	14.672	226350000	13	24.771	24.9952	24.8177	24.3645	8	3	3	2	0.321435	0.177562	1.13056	Q4G0J3;D6R9Z6;D6RFF0;H0YA82	Q4G0J3;D6R9Z6;D6RFF0;H0YA82	La-related protein 7	LARP7	2792	sp|Q4G0J3|LARP7_HUMAN La-related protein 7 OS=Homo sapiens OX=9606 GN=LARP7 PE=1 SV=1;tr|D6R9Z6|D6R9Z6_HUMAN La-related protein 7 (Fragment) OS=Homo sapiens OX=9606 GN=LARP7 PE=1 SV=1;tr|D6RFF0|D6RFF0_HUMAN La ribonucleoprotein domain family member 7 (Frag
26.3677	NaN	26.2342	26.376	NaN	NaN	26.3301	25.9728	NaN	25.9227	27.0301	26.5341	26.4145	26.5528	NaN			5	5	5	11	11	11	84.729	0	16.289	815000000	16	26.3735	26.3259	26.0752	26.6329	10	3	3	4	0.139511	0.250755	1.84054	K7EIK7;O95834;K7EII6;A0A0C4DGQ7;C9JRL6;K7EKG3;K7ELI8;K7ELB2	K7EIK7;O95834;K7EII6;A0A0C4DGQ7;C9JRL6;K7EKG3	Echinoderm microtubule-associated protein-like 2	EML2	1226	tr|K7EIK7|K7EIK7_HUMAN Echinoderm microtubule-associated protein-like 2 OS=Homo sapiens OX=9606 GN=EML2 PE=1 SV=1;sp|O95834|EMAL2_HUMAN Echinoderm microtubule-associated protein-like 2 OS=Homo sapiens OX=9606 GN=EML2 PE=1 SV=1;tr|K7EII6|K7EII6_HUMAN Echino
24.9701	24.9866	25.2426	NaN	NaN	NaN	24.9327	24.7195	NaN	24.5412	NaN	NaN	NaN	NaN	NaN			5	5	5	13.8	13.8	13.8	58.449	0	12.568	382830000	16	24.8988	25.0664	24.7312	NaN	6	3	3	0	0.0796818	0.33526	2.33651	O43172	O43172	U4/U6 small nuclear ribonucleoprotein Prp4	PRPF4	1391	sp|O43172|PRP4_HUMAN U4/U6 small nuclear ribonucleoprotein Prp4 OS=Homo sapiens OX=9606 GN=PRPF4 PE=1 SV=2
26.3575	26.1334	27.4501	NaN	NaN	NaN	26.813	26.3207	NaN	25.7165	NaN	26.1129	25.0406	26.3938	NaN			4	4	4	24.5	24.5	24.5	39.609	0	26.424	708620000	15	26.2598	26.647	26.2834	25.8491	9	3	3	3	0.519654	0.363615	0.705076	P54725;K7EQ16;A0A494C0B4;K7ENJ0;K7ELW1	P54725;K7EQ16;A0A494C0B4	UV excision repair protein RAD23 homolog A	RAD23A	2290	sp|P54725|RD23A_HUMAN UV excision repair protein RAD23 homolog A OS=Homo sapiens OX=9606 GN=RAD23A PE=1 SV=1;tr|K7EQ16|K7EQ16_HUMAN UV excision repair protein RAD23 (Fragment) OS=Homo sapiens OX=9606 GN=RAD23A PE=1 SV=1;tr|A0A494C0B4|A0A494C0B4_HUMAN UV ex
25.8379	26.0569	26.4663	NaN	NaN	NaN	25.8999	25.8307	NaN	25.3829	NaN	NaN	NaN	NaN	NaN			4	4	4	28.7	28.7	28.7	15.598	0	71.007	517940000	23	25.9124	26.1203	25.7045	NaN	6	3	3	0	0.165275	0.415847	1.69524	E9PQY2;Q9NQP4	E9PQY2;Q9NQP4	Prefoldin subunit 4	PFDN4	912	tr|E9PQY2|E9PQY2_HUMAN Prefoldin subunit 4 OS=Homo sapiens OX=9606 GN=PFDN4 PE=1 SV=1;sp|Q9NQP4|PFD4_HUMAN Prefoldin subunit 4 OS=Homo sapiens OX=9606 GN=PFDN4 PE=1 SV=1
24.8506	NaN	NaN	NaN	24.7968	26.0554	NaN	25.553	25.4553	NaN	26.6398	NaN	26.5862	26.4889	NaN	+	3NT_Control	4	4	4	8	8	8	61.446	0	25.556	434490000	25	25.8033	24.8237	25.6879	26.5716	8	2	3	3	0.0370834	-0.864158	-3.5877	A0A0A0MTI1;Q15392	A0A0A0MTI1;Q15392	Delta(24)-sterol reductase	DHCR24	162	tr|A0A0A0MTI1|A0A0A0MTI1_HUMAN Delta(24)-sterol reductase OS=Homo sapiens OX=9606 GN=DHCR24 PE=1 SV=1;sp|Q15392|DHC24_HUMAN Delta(24)-sterol reductase OS=Homo sapiens OX=9606 GN=DHCR24 PE=1 SV=2
25.487	NaN	25.2406	NaN	NaN	24.6983	24.6813	NaN	NaN	24.4785	NaN	NaN	NaN	NaN	NaN	+	3NT_Control	13	10	10	28.9	22.2	22.2	81.471	0	37.417	390390000	17	24.9171	25.3638	24.6193	NaN	5	2	3	0	0.0104281	0.744446	5.75418	E9PGT3;Q15418;Q5SVM7;E9PMM7;E9PAN7;B7Z3B5;D6R910;Q5SVM6	E9PGT3;Q15418	Ribosomal protein S6 kinase;Ribosomal protein S6 kinase alpha-1	RPS6KA1	859	tr|E9PGT3|E9PGT3_HUMAN Ribosomal protein S6 kinase OS=Homo sapiens OX=9606 GN=RPS6KA1 PE=1 SV=1;sp|Q15418|KS6A1_HUMAN Ribosomal protein S6 kinase alpha-1 OS=Homo sapiens OX=9606 GN=RPS6KA1 PE=1 SV=2
26.2237	NaN	25.4914	NaN	NaN	NaN	26.9199	26.9626	NaN	29.6624	NaN	NaN	NaN	NaN	NaN			7	1	1	9.4	1.9	1.9	105.31	0	49.482	3388800000	16	27.052	25.8576	27.8483	NaN	5	2	3	0	0.196398	-1.99075	-1.6555	P26232;C9J144;C9IZ88	P26232	Catenin alpha-2	CTNNA2	1956	sp|P26232|CTNA2_HUMAN Catenin alpha-2 OS=Homo sapiens OX=9606 GN=CTNNA2 PE=1 SV=5
24.4958	NaN	NaN	24.1942	NaN	25.6263	24.6112	NaN	NaN	24.5368	NaN	24.749	25.1377	25.1418	NaN			8	8	8	14.2	14.2	14.2	84.685	0	22.07	246330000	17	24.8116	24.345	24.9247	25.0095	8	2	3	3	0.303015	-0.57972	-1.24034	O00469;E7ETU9;C9JXZ0	O00469;E7ETU9	Procollagen-lysine,2-oxoglutarate 5-dioxygenase 2	PLOD2	818	sp|O00469|PLOD2_HUMAN Procollagen-lysine,2-oxoglutarate 5-dioxygenase 2 OS=Homo sapiens OX=9606 GN=PLOD2 PE=1 SV=2;tr|E7ETU9|E7ETU9_HUMAN Procollagen-lysine 5-dioxygenase OS=Homo sapiens OX=9606 GN=PLOD2 PE=1 SV=1
NaN	24.903	24.3402	NaN	NaN	NaN	24.7249	25.5555	NaN	24.9344	NaN	NaN	NaN	NaN	NaN			5	5	5	23.3	23.3	23.3	33.428	0	13.084	300590000	15	24.8916	24.6216	25.0716	NaN	5	2	3	0	0.326108	-0.450008	-1.17112	P53004;C9J1E1	P53004	Biliverdin reductase A	BLVRA	2271	sp|P53004|BIEA_HUMAN Biliverdin reductase A OS=Homo sapiens OX=9606 GN=BLVRA PE=1 SV=2
NaN	NaN	25.1297	23.3159	NaN	NaN	24.2836	24.727	NaN	25.0058	NaN	NaN	NaN	NaN	NaN			3	3	3	20.3	20.3	20.3	30.039	0	12.261	222430000	11	24.4924	24.2228	24.6721	NaN	5	2	3	0	0.581023	-0.449308	-0.616787	Q96B26	Q96B26	Exosome complex component RRP43	EXOSC8	3236	sp|Q96B26|EXOS8_HUMAN Exosome complex component RRP43 OS=Homo sapiens OX=9606 GN=EXOSC8 PE=1 SV=1
25.0066	NaN	NaN	24.6997	NaN	25.4235	25.0456	NaN	NaN	25.3284	25.3083	25.7423	25.7866	25.9472	NaN			4	4	4	5.7	5.7	5.7	75.403	0	16.27	207230000	20	25.3654	24.8532	25.2658	25.6961	9	2	3	4	0.113034	-0.412679	-2.22008	Q8WVC0	Q8WVC0	RNA polymerase-associated protein LEO1	LEO1	3148	sp|Q8WVC0|LEO1_HUMAN RNA polymerase-associated protein LEO1 OS=Homo sapiens OX=9606 GN=LEO1 PE=1 SV=1
NaN	NaN	25.3676	25.0612	NaN	25.9979	25.7917	NaN	NaN	25.0046	NaN	26.7349	26.4195	NaN	NaN			3	3	3	18.6	18.6	18.6	31.821	0	15.208	379750000	18	25.7682	25.2144	25.5981	26.5772	7	2	3	2	0.415446	-0.383685	-0.942551	Q15024	Q15024	Exosome complex component RRP42	EXOSC7	2694	sp|Q15024|EXOS7_HUMAN Exosome complex component RRP42 OS=Homo sapiens OX=9606 GN=EXOSC7 PE=1 SV=3
23.058	NaN	23.0814	NaN	NaN	NaN	23.7587	23.324	NaN	23.1162	NaN	NaN	NaN	NaN	NaN			2	2	2	3.1	3.1	3.1	110.52	0.00082372	3.1633	59199000	6	23.2677	23.0697	23.3996	NaN	5	2	3	0	0.269985	-0.329952	-1.34949	Q15042	Q15042	Rab3 GTPase-activating protein catalytic subunit	RAB3GAP1	2697	sp|Q15042|RB3GP_HUMAN Rab3 GTPase-activating protein catalytic subunit OS=Homo sapiens OX=9606 GN=RAB3GAP1 PE=1 SV=3
NaN	NaN	25.5157	25.6499	NaN	26.3712	NaN	25.7291	25.606	NaN	26.2905	NaN	NaN	NaN	NaN			3	3	3	16.8	16.8	16.8	33.868	0	10.712	354970000	13	25.8604	25.5828	25.9021	26.2905	6	2	3	1	0.379234	-0.319266	-1.02887	Q9UBR2	Q9UBR2	Cathepsin Z	CTSZ	3738	sp|Q9UBR2|CATZ_HUMAN Cathepsin Z OS=Homo sapiens OX=9606 GN=CTSZ PE=1 SV=1
24.9591	NaN	24.7902	NaN	NaN	NaN	25.4476	24.9066	NaN	25.0872	NaN	NaN	NaN	NaN	NaN			4	4	4	13.5	13.5	13.5	47.834	0	33.474	314800000	20	25.0381	24.8747	25.1471	NaN	5	2	3	0	0.294003	-0.272475	-1.26884	B4E107;F5GXE4;B4DK25;H0Y5C2;O95260;Q5SQQ1	B4E107;F5GXE4;B4DK25;H0Y5C2;O95260	Arginyl-tRNA--protein transferase 1	ATE1	532	tr|B4E107|B4E107_HUMAN Arginyl-tRNA--protein transferase 1 OS=Homo sapiens OX=9606 GN=ATE1 PE=1 SV=1;tr|F5GXE4|F5GXE4_HUMAN Arginyl-tRNA--protein transferase 1 OS=Homo sapiens OX=9606 GN=ATE1 PE=1 SV=1;tr|B4DK25|B4DK25_HUMAN Arginyl-tRNA--protein transfera
25.0986	23.9989	NaN	NaN	NaN	NaN	24.4991	24.6367	25.3279	NaN	NaN	NaN	NaN	NaN	NaN			4	4	4	26.8	26.8	26.8	22.109	0	18.596	192420000	22	24.7122	24.5487	24.8212	NaN	5	2	3	0	0.640765	-0.272459	-0.517146	H7BXD5;P28676;H7C2Z6;C9JIZ3;C9JWQ8	H7BXD5;P28676;H7C2Z6	Grancalcin	GCA	1136	tr|H7BXD5|H7BXD5_HUMAN Grancalcin OS=Homo sapiens OX=9606 GN=GCA PE=1 SV=1;sp|P28676|GRAN_HUMAN Grancalcin OS=Homo sapiens OX=9606 GN=GCA PE=1 SV=2;tr|H7C2Z6|H7C2Z6_HUMAN Grancalcin (Fragment) OS=Homo sapiens OX=9606 GN=GCA PE=1 SV=1
24.855	NaN	24.5937	NaN	NaN	NaN	25.2397	24.6574	NaN	25.0439	NaN	NaN	NaN	NaN	NaN			3	3	3	12.7	12.7	12.7	38.946	0	28.999	223200000	13	24.8779	24.7244	24.9803	NaN	5	2	3	0	0.366796	-0.255941	-1.06034	Q9NX46	Q9NX46	Poly(ADP-ribose) glycohydrolase ARH3	ADPRHL2	3682	sp|Q9NX46|ADPRS_HUMAN ADP-ribose glycohydrolase ARH3 OS=Homo sapiens OX=9606 GN=ADPRS PE=1 SV=1
25.1185	NaN	24.9723	NaN	NaN	NaN	25.0636	25.445	25.317	NaN	NaN	NaN	NaN	NaN	NaN			3	3	3	8.9	8.9	8.9	85.718	0	12.548	223080000	8	25.1833	25.0454	25.2752	NaN	5	2	3	0	0.233934	-0.229785	-1.48615	E9PS17;E9PK59;Q96KG9;E9PPN3;H0YDH0	E9PS17;E9PK59;Q96KG9;E9PPN3	N-terminal kinase-like protein	SCYL1	877	tr|E9PS17|E9PS17_HUMAN N-terminal kinase-like protein OS=Homo sapiens OX=9606 GN=SCYL1 PE=1 SV=1;tr|E9PK59|E9PK59_HUMAN N-terminal kinase-like protein OS=Homo sapiens OX=9606 GN=SCYL1 PE=1 SV=1;sp|Q96KG9|SCYL1_HUMAN N-terminal kinase-like protein OS=Homo s
24.2176	NaN	23.9264	NaN	NaN	NaN	24.0409	24.3276	NaN	24.5253	NaN	NaN	NaN	NaN	NaN			3	3	3	6	6	6	85.586	0	8.5694	151060000	10	24.2076	24.072	24.298	NaN	5	2	3	0	0.363764	-0.225926	-1.06817	J3QR07;Q96MU7;J3KS01;J3KRG5	J3QR07;Q96MU7	YTH domain-containing protein 1	YTHDC1	1218	tr|J3QR07|J3QR07_HUMAN YTH domain-containing protein 1 OS=Homo sapiens OX=9606 GN=YTHDC1 PE=1 SV=1;sp|Q96MU7|YTDC1_HUMAN YTH domain-containing protein 1 OS=Homo sapiens OX=9606 GN=YTHDC1 PE=1 SV=3
NaN	NaN	NaN	26.4795	27.1204	NaN	26.9058	27.3807	26.7694	NaN	NaN	NaN	NaN	NaN	NaN			3	3	3	32.9	32.9	32.9	8.2178	0	9.1217	908840000	16	26.9311	26.7999	27.0186	NaN	5	2	3	0	0.56377	-0.218684	-0.646919	P63173;J3KSP2;J3KT73;J3QL01	P63173;J3KSP2;J3KT73;J3QL01	60S ribosomal protein L38	RPL38	2425	sp|P63173|RL38_HUMAN 60S ribosomal protein L38 OS=Homo sapiens OX=9606 GN=RPL38 PE=1 SV=2;tr|J3KSP2|J3KSP2_HUMAN 60S ribosomal protein L38 (Fragment) OS=Homo sapiens OX=9606 GN=RPL38 PE=1 SV=1;tr|J3KT73|J3KT73_HUMAN 60S ribosomal protein L38 OS=Homo sapien
24.3308	NaN	24.7212	NaN	NaN	NaN	24.8672	24.4566	NaN	24.8986	NaN	NaN	NaN	NaN	NaN			5	5	5	8.9	8.9	8.9	88.828	0	21.832	235880000	19	24.6549	24.526	24.7408	NaN	5	2	3	0	0.427159	-0.214764	-0.916123	O43264;F5H3C1	O43264	Centromere/kinetochore protein zw10 homolog	ZW10	1395	sp|O43264|ZW10_HUMAN Centromere/kinetochore protein zw10 homolog OS=Homo sapiens OX=9606 GN=ZW10 PE=1 SV=3
NaN	NaN	25.3049	24.3678	NaN	NaN	24.792	25.0205	NaN	25.0531	NaN	NaN	24.889	24.9656	NaN			11	1	1	70.4	9.2	9.2	17.149	0	26.278	179750000	7	24.9133	24.8364	24.9552	24.9273	7	2	3	2	0.766089	-0.118856	-0.325637	P15531;E7ERL0;E5RHP0;C9K028	P15531;E7ERL0;E5RHP0	Nucleoside diphosphate kinase A	NME1	1833	sp|P15531|NDKA_HUMAN Nucleoside diphosphate kinase A OS=Homo sapiens OX=9606 GN=NME1 PE=1 SV=1;tr|E7ERL0|E7ERL0_HUMAN Nucleoside diphosphate kinase A OS=Homo sapiens OX=9606 GN=NME1 PE=1 SV=1;tr|E5RHP0|E5RHP0_HUMAN Nucleoside diphosphate kinase A OS=Homo s
25.315	25.3628	NaN	NaN	NaN	NaN	25.2912	25.5008	25.5666	NaN	25.6768	NaN	NaN	NaN	NaN			4	4	4	15.5	15.5	15.5	48.357	0	35.027	439340000	14	25.4522	25.3389	25.4528	25.6768	6	2	3	1	0.371336	-0.113955	-1.04874	Q05048;A0A0A0MSZ9;A3KFI9	Q05048;A0A0A0MSZ9	Cleavage stimulation factor subunit 1	CSTF1	2509	sp|Q05048|CSTF1_HUMAN Cleavage stimulation factor subunit 1 OS=Homo sapiens OX=9606 GN=CSTF1 PE=1 SV=1;tr|A0A0A0MSZ9|A0A0A0MSZ9_HUMAN Cleavage stimulation factor subunit 1 (Fragment) OS=Homo sapiens OX=9606 GN=CSTF1 PE=1 SV=1
24.4408	23.2302	NaN	NaN	NaN	NaN	23.9101	23.8211	24.014	NaN	NaN	NaN	NaN	NaN	NaN			3	3	3	12.3	12.3	12.3	36.804	0	8.5415	92406000	11	23.8833	23.8355	23.9151	NaN	5	2	3	0	0.872767	-0.0796029	-0.174247	Q8WVY7	Q8WVY7	Ubiquitin-like domain-containing CTD phosphatase 1	UBLCP1	3153	sp|Q8WVY7|UBCP1_HUMAN Ubiquitin-like domain-containing CTD phosphatase 1 OS=Homo sapiens OX=9606 GN=UBLCP1 PE=1 SV=2
25.616	NaN	25.6644	NaN	NaN	NaN	26.6387	25.0167	NaN	25.4258	NaN	NaN	NaN	NaN	NaN			8	5	5	20.8	14.2	14.2	56.811	0	12.051	376260000	15	25.6723	25.6402	25.6937	NaN	5	2	3	0	0.937548	-0.0535215	-0.0850931	P09923	P09923	Intestinal-type alkaline phosphatase	ALPI	1739	sp|P09923|PPBI_HUMAN Intestinal-type alkaline phosphatase OS=Homo sapiens OX=9606 GN=ALPI PE=1 SV=2
25.8156	26.5912	NaN	NaN	NaN	NaN	NaN	26.3284	26.2512	26.1105	NaN	NaN	NaN	NaN	NaN			4	4	4	20.1	20.1	20.1	23.333	0	18.586	491910000	17	26.2194	26.2034	26.23	NaN	5	2	3	0	0.93493	-0.0266523	-0.0886727	H7C5A7;O14734;E9PJN0;H0Y698;Q9BR14;E9PMC4;E9PIS4;A0A494C0N6	H7C5A7;O14734;E9PJN0;H0Y698;Q9BR14;E9PMC4;E9PIS4	Acyl-coenzyme A thioesterase 8	ACOT8	1170	tr|H7C5A7|H7C5A7_HUMAN Acyl-coenzyme A thioesterase 8 (Fragment) OS=Homo sapiens OX=9606 GN=ACOT8 PE=1 SV=1;sp|O14734|ACOT8_HUMAN Acyl-coenzyme A thioesterase 8 OS=Homo sapiens OX=9606 GN=ACOT8 PE=1 SV=1;tr|E9PJN0|E9PJN0_HUMAN Acyl-coenzyme A thioesterase
25.5871	25.4599	NaN	NaN	NaN	NaN	25.7206	25.3667	NaN	25.5192	NaN	NaN	NaN	NaN	NaN			9	1	0	71.7	26.2	0	15.754	0	134.5	280650000	6	25.5307	25.5235	25.5355	NaN	5	2	3	0	0.937379	-0.0119931	-0.0853245	F5H0E2	F5H0E2		SLC3A2	932	tr|F5H0E2|F5H0E2_HUMAN 4F2 cell-surface antigen heavy chain (Fragment) OS=Homo sapiens OX=9606 GN=SLC3A2 PE=1 SV=1
23.6043	23.86	NaN	NaN	NaN	NaN	23.8783	23.7238	23.6232	NaN	NaN	NaN	NaN	NaN	NaN			3	3	3	16.2	16.2	16.2	23.39	0	8.3066	89605000	16	23.7379	23.7322	23.7418	NaN	5	2	3	0	0.947891	-0.00958761	-0.0709654	Q7Z4H3;V9GYS5;V9GZ04	Q7Z4H3;V9GYS5;V9GZ04	HD domain-containing protein 2	HDDC2	2965	sp|Q7Z4H3|HDDC2_HUMAN 5-deoxynucleotidase HDDC2 OS=Homo sapiens OX=9606 GN=HDDC2 PE=1 SV=1;tr|V9GYS5|V9GYS5_HUMAN 5-deoxynucleotidase HDDC2 OS=Homo sapiens OX=9606 GN=HDDC2 PE=1 SV=1;tr|V9GZ04|V9GZ04_HUMAN 5-deoxynucleotidase HDDC2 OS=Homo sapiens OX=96
25.3491	NaN	24.3245	NaN	NaN	NaN	24.8521	25.0495	NaN	24.6028	NaN	NaN	NaN	NaN	NaN			7	7	7	6	6	6	163.82	0	24.172	243580000	11	24.8356	24.8368	24.8348	NaN	5	2	3	0	0.99655	0.00195535	0.00469258	Q96T23;H0YER1;H0YCN2;H0YEX0;H7C306	Q96T23;H0YER1;H0YCN2	Remodeling and spacing factor 1	RSF1	3337	sp|Q96T23|RSF1_HUMAN Remodeling and spacing factor 1 OS=Homo sapiens OX=9606 GN=RSF1 PE=1 SV=2;tr|H0YER1|H0YER1_HUMAN Remodeling and spacing factor 1 (Fragment) OS=Homo sapiens OX=9606 GN=RSF1 PE=1 SV=1;tr|H0YCN2|H0YCN2_HUMAN Remodeling and spacing factor
24.6802	NaN	25.1939	NaN	NaN	NaN	25.2379	24.8737	NaN	24.6933	NaN	NaN	NaN	NaN	NaN			6	6	6	12	12	12	86.401	0	24.978	228360000	15	24.9358	24.9371	24.9349	NaN	5	2	3	0	0.994472	0.00211906	0.00752005	O95140;Q5JXC5	O95140	Mitofusin-2	MFN2	1553	sp|O95140|MFN2_HUMAN Mitofusin-2 OS=Homo sapiens OX=9606 GN=MFN2 PE=1 SV=3
24.5878	NaN	NaN	NaN	24.9683	25.0691	24.7613	NaN	24.4864	NaN	25.1867	25.0772	25.3476	25.192	NaN			4	4	4	13.7	13.7	13.7	40.842	0	20.922	241740000	17	24.964	24.7781	24.7723	25.2009	9	2	3	4	0.983545	0.00580851	0.0223871	Q9Y2P8;Q5VZU2;Q5VYW8;Q5VZU3	Q9Y2P8	RNA 3-terminal phosphate cyclase-like protein	RCL1	3859	sp|Q9Y2P8|RCL1_HUMAN RNA 3-terminal phosphate cyclase-like protein OS=Homo sapiens OX=9606 GN=RCL1 PE=1 SV=3
25.5326	25.8235	NaN	NaN	NaN	NaN	25.5887	NaN	25.7605	25.4987	NaN	NaN	25.5315	26.2406	NaN			4	4	4	31.8	31.8	31.8	19.536	0	19.207	347990000	17	25.7109	25.6781	25.616	25.8861	7	2	3	2	0.7009	0.0621169	0.422827	E9PL57;Q86V88;F8VSA6;E9PS38;S4R3E9;Q15843	E9PL57;Q86V88	Magnesium-dependent phosphatase 1	NEDD8-MDP1;MDP1	885	tr|E9PL57|E9PL57_HUMAN NEDD8 (Fragment) OS=Homo sapiens OX=9606 GN=NEDD8-MDP1 PE=3 SV=1;sp|Q86V88|MGDP1_HUMAN Magnesium-dependent phosphatase 1 OS=Homo sapiens OX=9606 GN=MDP1 PE=1 SV=1
25.8946	NaN	25.1096	NaN	NaN	NaN	25.6217	25.1864	NaN	25.4736	NaN	NaN	NaN	NaN	NaN			3	3	3	6.8	6.8	6.8	78.579	0	12.301	498420000	19	25.4572	25.5021	25.4272	NaN	5	2	3	0	0.837855	0.0749035	0.223002	Q9NR19;F8WDJ9;F8WCJ4;C9JXD9;C9J7L5;C9IYL0;B4DEH9;C9JY31	Q9NR19	Acetyl-coenzyme A synthetase, cytoplasmic	ACSS2	3622	sp|Q9NR19|ACSA_HUMAN Acetyl-coenzyme A synthetase, cytoplasmic OS=Homo sapiens OX=9606 GN=ACSS2 PE=1 SV=1
26.2439	26.5138	NaN	NaN	NaN	NaN	26.2082	26.299	NaN	26.3456	NaN	25.8343	NaN	NaN	NaN			5	5	5	16.9	16.9	16.9	69.54	0	64.507	667010000	13	26.2408	26.3788	26.2843	25.8343	6	2	3	1	0.465039	0.0945759	0.8349	A0A0G2JP44;A0A0G2JMW3;Q9HBB8	A0A0G2JP44;A0A0G2JMW3;Q9HBB8	Cadherin-related family member 5	CDHR5	228	tr|A0A0G2JP44|A0A0G2JP44_HUMAN Cadherin-related family member 5 OS=Homo sapiens OX=9606 GN=CDHR5 PE=1 SV=1;tr|A0A0G2JMW3|A0A0G2JMW3_HUMAN Cadherin-related family member 5 OS=Homo sapiens OX=9606 GN=CDHR5 PE=1 SV=1;sp|Q9HBB8|CDHR5_HUMAN Cadherin-related fam
24.1879	NaN	23.787	NaN	NaN	NaN	23.9527	23.8207	NaN	23.7681	NaN	NaN	NaN	NaN	NaN			4	4	4	33.9	33.9	33.9	14.512	0	10.887	95178000	8	23.9033	23.9874	23.8472	NaN	5	2	3	0	0.458711	0.140251	0.848052	U3KQP8;Q96AQ8	U3KQP8;Q96AQ8	Mitochondrial calcium uniporter regulator 1	MCUR1	3232	tr|U3KQP8|U3KQP8_HUMAN Mitochondrial calcium uniporter regulator 1 (Fragment) OS=Homo sapiens OX=9606 GN=MCUR1 PE=1 SV=1;sp|Q96AQ8|MCUR1_HUMAN Mitochondrial calcium uniporter regulator 1 OS=Homo sapiens OX=9606 GN=MCUR1 PE=1 SV=1
25.2935	NaN	25.0481	NaN	NaN	25.0527	24.9743	24.9868	NaN	NaN	NaN	NaN	NaN	NaN	NaN			4	4	4	12.5	12.5	12.5	55.324	0	16.709	259170000	10	25.0711	25.1708	25.0046	NaN	5	2	3	0	0.184043	0.166219	1.71934	F5H8F7;Q9UBL3;H0YBF6;H0YAQ0	F5H8F7;Q9UBL3;H0YBF6	Set1/Ash2 histone methyltransferase complex subunit ASH2	ASH2L	955	tr|F5H8F7|F5H8F7_HUMAN Set1/Ash2 histone methyltransferase complex subunit ASH2 OS=Homo sapiens OX=9606 GN=ASH2L PE=1 SV=1;sp|Q9UBL3|ASH2L_HUMAN Set1/Ash2 histone methyltransferase complex subunit ASH2 OS=Homo sapiens OX=9606 GN=ASH2L PE=1 SV=1;tr|H0YBF6|H
NaN	NaN	25.467	NaN	24.4735	24.7176	NaN	24.3112	NaN	25.2083	NaN	NaN	NaN	NaN	NaN			3	3	3	23.9	23.9	23.9	20.497	0	10.694	241400000	9	24.8355	24.9703	24.7457	NaN	5	2	3	0	0.683346	0.224551	0.449833	Q15382;C9J931;C9J469	Q15382;C9J931	GTP-binding protein Rheb	RHEB	595	sp|Q15382|RHEB_HUMAN GTP-binding protein Rheb OS=Homo sapiens OX=9606 GN=RHEB PE=1 SV=1;tr|C9J931|C9J931_HUMAN GTP-binding protein Rheb OS=Homo sapiens OX=9606 GN=RHEB PE=1 SV=1
NaN	26.5307	25.7325	NaN	NaN	NaN	25.9575	NaN	25.8134	25.739	NaN	25.1476	NaN	25.5029	NaN			5	5	5	15.9	15.9	15.9	54.858	0	12.538	435940000	19	25.7748	26.1316	25.8366	25.3253	7	2	3	2	0.409949	0.294968	0.955191	Q96DZ1	Q96DZ1	Endoplasmic reticulum lectin 1	ERLEC1	3259	sp|Q96DZ1|ERLEC_HUMAN Endoplasmic reticulum lectin 1 OS=Homo sapiens OX=9606 GN=ERLEC1 PE=1 SV=1
23.6913	NaN	23.9506	NaN	NaN	NaN	23.6442	23.6644	NaN	23.2681	NaN	NaN	NaN	NaN	NaN			2	2	1	21	21	8.7	15.388	0	8.9897	88318000	14	23.6437	23.821	23.5256	NaN	5	2	3	0	0.222257	0.295391	1.5354	A0A1B0GW03	A0A1B0GW03			269	tr|A0A1B0GW03|A0A1B0GW03_HUMAN Pleckstrin homology domain-containing family A member 6 (Fragment) OS=Homo sapiens OX=9606 GN=PLEKHA6 PE=1 SV=2
NaN	28.3403	28.0486	NaN	NaN	NaN	NaN	27.8084	28.3537	27.4705	NaN	NaN	NaN	NaN	NaN			28	2	0	63.9	3.1	0	50.135	0	11.111	2125800000	13	28.0043	28.1945	27.8775	NaN	5	2	3	0	0.431345	0.316934	0.906836	Q71U36;P0DPH8;P0DPH7;Q6PEY2	Q71U36;P0DPH8;P0DPH7;Q6PEY2	Tubulin alpha-1A chain;Tubulin alpha-3E chain	TUBA1A;TUBA3E	2941	sp|Q71U36|TBA1A_HUMAN Tubulin alpha-1A chain OS=Homo sapiens OX=9606 GN=TUBA1A PE=1 SV=1;sp|P0DPH8|TBA3D_HUMAN Tubulin alpha-3D chain OS=Homo sapiens OX=9606 GN=TUBA3D PE=1 SV=1;sp|P0DPH7|TBA3C_HUMAN Tubulin alpha-3C chain OS=Homo sapiens OX=9606 GN=TUBA3C
NaN	NaN	24.7503	NaN	25.2899	NaN	24.6263	NaN	24.6749	24.7256	NaN	NaN	24.8204	24.9947	NaN			4	4	3	25.2	25.2	18.8	24.389	0	20.612	229790000	19	24.8403	25.0201	24.6756	24.9075	7	2	3	2	0.19063	0.344471	1.68472	P20338;A0A087WYT5	P20338	Ras-related protein Rab-4A	RAB4A	1894	sp|P20338|RAB4A_HUMAN Ras-related protein Rab-4A OS=Homo sapiens OX=9606 GN=RAB4A PE=1 SV=3
24.9744	24.9315	NaN	NaN	NaN	NaN	24.7231	24.3732	NaN	24.2616	NaN	NaN	NaN	NaN	NaN			3	3	3	7.6	7.6	7.6	75.34	0	10.722	190430000	13	24.6528	24.953	24.4526	NaN	5	2	3	0	0.0691823	0.500312	2.77667	O60504;E5RJP2;H0YAZ3;H0YB51;E5RIA0	O60504;E5RJP2;H0YAZ3;H0YB51	Vinexin	SORBS3	1446	sp|O60504|VINEX_HUMAN Vinexin OS=Homo sapiens OX=9606 GN=SORBS3 PE=1 SV=2;tr|E5RJP2|E5RJP2_HUMAN Vinexin (Fragment) OS=Homo sapiens OX=9606 GN=SORBS3 PE=1 SV=1;tr|H0YAZ3|H0YAZ3_HUMAN Vinexin (Fragment) OS=Homo sapiens OX=9606 GN=SORBS3 PE=1 SV=1;tr|H0YB51|
26.96	NaN	25.896	NaN	NaN	NaN	25.5416	25.1597	25.2589	NaN	NaN	NaN	NaN	NaN	NaN			4	4	4	29.2	29.2	29.2	28.825	0	11.395	463760000	13	25.7632	26.428	25.32	NaN	5	2	3	0	0.0791191	1.10796	2.61827	Q9Y5Y2;H3BRK5;B7Z6P0;H3BMW1;H3BQR2;H3BNF0;H3BNS4	Q9Y5Y2;H3BRK5;B7Z6P0;H3BMW1;H3BQR2;H3BNF0	Cytosolic Fe-S cluster assembly factor NUBP2	NUBP2	3928	sp|Q9Y5Y2|NUBP2_HUMAN Cytosolic Fe-S cluster assembly factor NUBP2 OS=Homo sapiens OX=9606 GN=NUBP2 PE=1 SV=1;tr|H3BRK5|H3BRK5_HUMAN Cytosolic Fe-S cluster assembly factor NUBP2 OS=Homo sapiens OX=9606 GN=NUBP2 PE=1 SV=1;tr|B7Z6P0|B7Z6P0_HUMAN Cytosolic Fe
24.6536	NaN	NaN	NaN	NaN	25.4531	NaN	25.6182	NaN	25.9051	NaN	NaN	NaN	25.2547	NaN			4	4	4	6.4	6.4	6.4	105.67	0	15.986	336190000	23	25.3769	24.6536	25.6588	25.2547	5	1	3	1	1	-1.00518	0	Q9NXF1	Q9NXF1	Testis-expressed sequence 10 protein	TEX10	3688	sp|Q9NXF1|TEX10_HUMAN Testis-expressed protein 10 OS=Homo sapiens OX=9606 GN=TEX10 PE=1 SV=2
24.7467	NaN	NaN	NaN	NaN	NaN	25.7521	25.6072	NaN	25.4602	NaN	NaN	NaN	NaN	NaN			7	7	7	7.9	7.9	7.9	158.3	0	9.1229	470220000	24	25.3916	24.7467	25.6065	NaN	4	1	3	0	1	-0.859834	0	Q96RT1;B4DIP2;H0YA04	Q96RT1	Protein LAP2	ERBB2IP	3328	sp|Q96RT1|ERBIN_HUMAN Erbin OS=Homo sapiens OX=9606 GN=ERBIN PE=1 SV=2
25.5535	NaN	NaN	NaN	NaN	26.1073	26.248	NaN	NaN	26.2315	NaN	NaN	25.9541	26.0972	NaN			6	6	6	15	15	15	49.352	0	13.544	530620000	13	26.0319	25.5535	26.1956	26.0257	6	1	3	2	1	-0.642117	0	A0A5F9ZHR7;P11117;A0A5F9ZH82;E9PHY0;E9PQY3;B7Z7D2;A0A5F9ZI20;A0A5F9ZH40;B7Z6U3	A0A5F9ZHR7;P11117;A0A5F9ZH82;E9PHY0;E9PQY3;B7Z7D2;A0A5F9ZI20;A0A5F9ZH40;B7Z6U3	Lysosomal acid phosphatase	ACP2	407	tr|A0A5F9ZHR7|A0A5F9ZHR7_HUMAN Lysosomal acid phosphatase OS=Homo sapiens OX=9606 GN=ACP2 PE=1 SV=1;sp|P11117|PPAL_HUMAN Lysosomal acid phosphatase OS=Homo sapiens OX=9606 GN=ACP2 PE=1 SV=3;tr|A0A5F9ZH82|A0A5F9ZH82_HUMAN Lysosomal acid phosphatase (Fragmen
23.9976	NaN	NaN	NaN	NaN	26.7349	NaN	23.7441	NaN	23.3369	25.5645	26.1501	25.9273	25.436	NaN			11	11	11	23	23	23	82.265	0	58.669	354540000	36	25.1114	23.9976	24.6053	25.7695	8	1	3	4	1	-0.607718	0	P54802	P54802	Alpha-N-acetylglucosaminidase;Alpha-N-acetylglucosaminidase 82 kDa form;Alpha-N-acetylglucosaminidase 77 kDa form	NAGLU	2292	sp|P54802|ANAG_HUMAN Alpha-N-acetylglucosaminidase OS=Homo sapiens OX=9606 GN=NAGLU PE=1 SV=2
24.7363	NaN	NaN	NaN	NaN	NaN	25.4379	25.18	NaN	25.3286	NaN	NaN	NaN	NaN	NaN			5	5	5	15.8	15.8	15.8	53.488	0	22.052	246870000	18	25.1707	24.7363	25.3155	NaN	4	1	3	0	1	-0.579146	0	Q9UBB4;A0A1W2PQD2;B1AHE4	Q9UBB4;A0A1W2PQD2	Ataxin-10	ATXN10	3730	sp|Q9UBB4|ATX10_HUMAN Ataxin-10 OS=Homo sapiens OX=9606 GN=ATXN10 PE=1 SV=1;tr|A0A1W2PQD2|A0A1W2PQD2_HUMAN Ataxin-10 OS=Homo sapiens OX=9606 GN=ATXN10 PE=1 SV=1
24.9193	NaN	NaN	NaN	NaN	26.0069	25.1411	NaN	NaN	25.2583	NaN	NaN	NaN	NaN	NaN			4	4	4	14.4	14.4	14.4	31.608	0	9.0646	212230000	15	25.3314	24.9193	25.4688	NaN	4	1	3	0	1	-0.549472	0	P42574;C9JXR7;A8MVM1	P42574;C9JXR7;A8MVM1	Caspase-3;Caspase-3 subunit p17;Caspase-3 subunit p12	CASP3	2126	sp|P42574|CASP3_HUMAN Caspase-3 OS=Homo sapiens OX=9606 GN=CASP3 PE=1 SV=2;tr|C9JXR7|C9JXR7_HUMAN Caspase-3 (Fragment) OS=Homo sapiens OX=9606 GN=CASP3 PE=1 SV=2;tr|A8MVM1|A8MVM1_HUMAN Caspase-3 OS=Homo sapiens OX=9606 GN=CASP3 PE=1 SV=2
NaN	NaN	24.3742	NaN	NaN	25.4312	24.8484	NaN	NaN	24.3033	NaN	24.7173	25.3805	24.5139	NaN			5	5	5	21.4	21.4	21.4	39.154	0	16.31	295430000	19	24.7955	24.3742	24.861	24.8705	7	1	3	3	1	-0.486789	0	Q4G0F5;H0YCI7	Q4G0F5	Vacuolar protein sorting-associated protein 26B	VPS26B	2790	sp|Q4G0F5|VP26B_HUMAN Vacuolar protein sorting-associated protein 26B OS=Homo sapiens OX=9606 GN=VPS26B PE=1 SV=2
24.5626	NaN	NaN	NaN	NaN	25.4552	24.8998	NaN	NaN	24.5314	NaN	NaN	NaN	NaN	NaN			7	7	7	16.3	16.3	16.3	57.278	0	19.24	217250000	13	24.8623	24.5626	24.9621	NaN	4	1	3	0	1	-0.399529	0	A0A0C4DFL7;Q16850;A0A3B3ITR4;C9IYR8;H7C0D0	A0A0C4DFL7;Q16850	Lanosterol 14-alpha demethylase	CYP51A1	183	tr|A0A0C4DFL7|A0A0C4DFL7_HUMAN Lanosterol 14-alpha demethylase OS=Homo sapiens OX=9606 GN=CYP51A1 PE=1 SV=1;sp|Q16850|CP51A_HUMAN Lanosterol 14-alpha demethylase OS=Homo sapiens OX=9606 GN=CYP51A1 PE=1 SV=3
25.9189	NaN	NaN	NaN	NaN	26.4691	NaN	26.4941	NaN	25.83	26.2468	26.4141	26.6512	26.4655	NaN			8	8	8	11.2	11.2	11.2	113.74	0	22.773	565580000	20	26.3112	25.9189	26.2644	26.4444	8	1	3	4	1	-0.345524	0	O00754;M0QZ24;M0R174	O00754	Lysosomal alpha-mannosidase;Lysosomal alpha-mannosidase A peptide;Lysosomal alpha-mannosidase B peptide;Lysosomal alpha-mannosidase C peptide;Lysosomal alpha-mannosidase D peptide;Lysosomal alpha-mannosidase E peptide	MAN2B1	1323	sp|O00754|MA2B1_HUMAN Lysosomal alpha-mannosidase OS=Homo sapiens OX=9606 GN=MAN2B1 PE=1 SV=3
24.8409	NaN	NaN	NaN	NaN	25.0559	NaN	NaN	25.3757	25.0143	25.4408	25.2343	25.5348	25.588	NaN			10	10	10	8.3	8.3	8.3	199.07	0	36.3	326660000	19	25.2606	24.8409	25.1486	25.4495	8	1	3	4	1	-0.307704	0	Q7KZ85	Q7KZ85	Transcription elongation factor SPT6	SUPT6H	2942	sp|Q7KZ85|SPT6H_HUMAN Transcription elongation factor SPT6 OS=Homo sapiens OX=9606 GN=SUPT6H PE=1 SV=2
25.8447	NaN	NaN	NaN	NaN	NaN	26.5029	25.8204	NaN	25.5566	NaN	NaN	NaN	NaN	NaN			4	4	4	18.8	18.8	18.8	28.817	0	18.188	378160000	10	25.9311	25.8447	25.96	NaN	4	1	3	0	1	-0.115322	0	J3QTA6;Q9BRQ6;H0Y922;J3QTB2	J3QTA6;Q9BRQ6;H0Y922	MICOS complex subunit MIC25	CHCHD6	1224	tr|J3QTA6|J3QTA6_HUMAN MICOS complex subunit OS=Homo sapiens OX=9606 GN=CHCHD6 PE=1 SV=1;sp|Q9BRQ6|MIC25_HUMAN MICOS complex subunit MIC25 OS=Homo sapiens OX=9606 GN=CHCHD6 PE=1 SV=1;tr|H0Y922|H0Y922_HUMAN MICOS complex subunit (Fragment) OS=Homo sapiens O
25.8321	NaN	NaN	NaN	NaN	26.7776	25.8395	NaN	NaN	25.2099	NaN	NaN	25.2063	26.5426	NaN			7	7	7	22.4	22.4	22.4	60.901	0	19.065	489960000	14	25.9013	25.8321	25.9423	25.8744	6	1	3	2	1	-0.110209	0	O15460	O15460	Prolyl 4-hydroxylase subunit alpha-2	P4HA2	1385	sp|O15460|P4HA2_HUMAN Prolyl 4-hydroxylase subunit alpha-2 OS=Homo sapiens OX=9606 GN=P4HA2 PE=1 SV=1
23.8705	NaN	NaN	NaN	NaN	24.048	23.8819	NaN	NaN	23.9308	NaN	NaN	NaN	NaN	NaN			3	3	3	7.6	7.6	7.6	83.597	0	8.7412	118590000	6	23.9328	23.8705	23.9535	NaN	4	1	3	0	1	-0.0830275	0	P27986;E5RJY0;H0YBC2	P27986	Phosphatidylinositol 3-kinase regulatory subunit alpha	PIK3R1	1976	sp|P27986|P85A_HUMAN Phosphatidylinositol 3-kinase regulatory subunit alpha OS=Homo sapiens OX=9606 GN=PIK3R1 PE=1 SV=2
25.3247	NaN	NaN	NaN	NaN	NaN	25.3757	25.5506	NaN	25.1598	NaN	25.1325	25.2074	NaN	NaN			5	5	5	15.7	15.7	15.7	42.486	0	9.843	445220000	15	25.2918	25.3247	25.362	25.17	6	1	3	2	1	-0.0373599	0	Q96FC7;E5RHN5;Q92561	Q96FC7	Phytanoyl-CoA hydroxylase-interacting protein-like	PHYHIPL	3268	sp|Q96FC7|PHIPL_HUMAN Phytanoyl-CoA hydroxylase-interacting protein-like OS=Homo sapiens OX=9606 GN=PHYHIPL PE=1 SV=3
26.4488	NaN	NaN	NaN	NaN	NaN	26.6757	26.5795	NaN	26.1716	NaN	NaN	NaN	NaN	NaN			3	3	3	13	13	13	23.13	0	12.935	417210000	10	26.4689	26.4488	26.4756	NaN	4	1	3	0	1	-0.0267563	0	Q8N511;J3KS81;J3KRW7	Q8N511;J3KS81	Transmembrane protein 199	TMEM199	1202	sp|Q8N511|TM199_HUMAN Transmembrane protein 199 OS=Homo sapiens OX=9606 GN=TMEM199 PE=1 SV=1;tr|J3KS81|J3KS81_HUMAN Transmembrane protein 199 OS=Homo sapiens OX=9606 GN=TMEM199 PE=1 SV=1
25.3028	NaN	NaN	NaN	NaN	25.6311	24.9926	NaN	NaN	25.322	NaN	NaN	NaN	NaN	NaN			6	6	6	4.9	4.9	4.9	174.21	0	21.583	403600000	15	25.3121	25.3028	25.3152	NaN	4	1	3	0	1	-0.0124296	0	Q92887;A0A3B3ITG8	Q92887	Canalicular multispecific organic anion transporter 1	ABCC2	3197	sp|Q92887|MRP2_HUMAN Canalicular multispecific organic anion transporter 1 OS=Homo sapiens OX=9606 GN=ABCC2 PE=1 SV=3
25.0534	NaN	NaN	NaN	NaN	NaN	24.9169	25.1801	NaN	25.0981	NaN	NaN	NaN	NaN	NaN			10	10	9	22.3	22.3	20.6	68.117	0	77.039	462800000	23	25.0621	25.0534	25.0651	NaN	4	1	3	0	1	-0.0116819	0	Q8IXI1;H3BST5;I3L2C6;H3BU27;H3BMP9;H3BVI5;H3BUX4	Q8IXI1;H3BST5;I3L2C6	Mitochondrial Rho GTPase 2	RHOT2	3019	sp|Q8IXI1|MIRO2_HUMAN Mitochondrial Rho GTPase 2 OS=Homo sapiens OX=9606 GN=RHOT2 PE=1 SV=2;tr|H3BST5|H3BST5_HUMAN Mitochondrial Rho GTPase 2 (Fragment) OS=Homo sapiens OX=9606 GN=RHOT2 PE=1 SV=2;tr|I3L2C6|I3L2C6_HUMAN Mitochondrial Rho GTPase 2 (Fragment)
24.9155	NaN	NaN	NaN	NaN	NaN	NaN	24.8409	24.9713	24.8886	NaN	NaN	NaN	NaN	NaN			5	5	5	9	9	9	85.566	0	10.809	166040000	7	24.9041	24.9155	24.9003	NaN	4	1	3	0	1	0.015227	0	O60645;D6RB59;D6RBR9;H0Y995	O60645;D6RB59	Exocyst complex component 3	EXOC3	1453	sp|O60645|EXOC3_HUMAN Exocyst complex component 3 OS=Homo sapiens OX=9606 GN=EXOC3 PE=1 SV=3;tr|D6RB59|D6RB59_HUMAN Exocyst complex component 3 OS=Homo sapiens OX=9606 GN=EXOC3 PE=1 SV=1
24.6564	NaN	NaN	NaN	NaN	NaN	24.7091	24.3949	NaN	24.8122	NaN	NaN	23.5107	NaN	NaN			8	8	8	20.7	20.7	20.7	60.693	0	30.819	336840000	18	24.4167	24.6564	24.6387	23.5107	5	1	3	1	1	0.0176551	0	P83111;H0YNN5	P83111	Serine beta-lactamase-like protein LACTB, mitochondrial	LACTB	2461	sp|P83111|LACTB_HUMAN Serine beta-lactamase-like protein LACTB, mitochondrial OS=Homo sapiens OX=9606 GN=LACTB PE=1 SV=2
23.9668	NaN	NaN	NaN	NaN	NaN	23.914	23.9586	NaN	23.8845	NaN	NaN	NaN	NaN	NaN			4	4	4	9.1	9.1	9.1	76.304	0	54.171	105460000	10	23.931	23.9668	23.919	NaN	4	1	3	0	1	0.047732	0	Q9BTX1	Q9BTX1	Nucleoporin NDC1	NDC1	3415	sp|Q9BTX1|NDC1_HUMAN Nucleoporin NDC1 OS=Homo sapiens OX=9606 GN=NDC1 PE=1 SV=2
24.917	NaN	NaN	NaN	NaN	NaN	25.1742	24.6319	NaN	24.7743	NaN	NaN	NaN	NaN	NaN			9	6	6	19.9	15.6	15.6	53.235	0	12.512	268760000	12	24.8744	24.917	24.8601	NaN	4	1	3	0	1	0.0568848	0	A0A2R8Y3N3;A0A2R8Y5P7;P49590;A0A2R8Y6I1;D6RB22;B4DQ67;A0A2R8Y5E8;A0A2R8Y4X6;D6RJE6	A0A2R8Y3N3;A0A2R8Y5P7;P49590;A0A2R8Y6I1;D6RB22;B4DQ67	Probable histidine--tRNA ligase, mitochondrial	HARS2	302	tr|A0A2R8Y3N3|A0A2R8Y3N3_HUMAN Histidine--tRNA ligase OS=Homo sapiens OX=9606 GN=HARS2 PE=1 SV=1;tr|A0A2R8Y5P7|A0A2R8Y5P7_HUMAN Histidine--tRNA ligase OS=Homo sapiens OX=9606 GN=HARS2 PE=1 SV=1;sp|P49590|SYHM_HUMAN Histidine--tRNA ligase, mitochondrial OS=
26.8748	NaN	NaN	NaN	NaN	NaN	26.4164	26.6242	NaN	27.4104	NaN	NaN	NaN	NaN	NaN			175	2	1	70.3	1.5	0.8	287.6	0	62.532	780010000	16	26.8314	26.8748	26.817	NaN	4	1	3	0	1	0.0577984	0	A0A0D9SGF6	A0A0D9SGF6		SPTAN1	221	tr|A0A0D9SGF6|A0A0D9SGF6_HUMAN Spectrin alpha chain, non-erythrocytic 1 OS=Homo sapiens OX=9606 GN=SPTAN1 PE=1 SV=1
25.4226	NaN	NaN	NaN	NaN	NaN	25.2712	25.341	NaN	25.4602	NaN	NaN	NaN	NaN	NaN			3	3	3	50.6	50.6	50.6	10.378	0	11.339	253620000	9	25.3737	25.4226	25.3574	NaN	4	1	3	0	1	0.0651436	0	Q9Y5J7;G3V2F3;A0A1W2PRH9;A0A1W2PQS5;G3V502	Q9Y5J7	Mitochondrial import inner membrane translocase subunit Tim9	TIMM9	3917	sp|Q9Y5J7|TIM9_HUMAN Mitochondrial import inner membrane translocase subunit Tim9 OS=Homo sapiens OX=9606 GN=TIMM9 PE=1 SV=1
NaN	25.279	NaN	NaN	NaN	NaN	24.9724	NaN	25.381	25.2678	NaN	NaN	NaN	NaN	NaN			8	8	8	29	29	29	28.633	0	50.06	373180000	18	25.2251	25.279	25.2071	NaN	4	1	3	0	1	0.0719121	0	E5RH53;Q96DB5;H0YB83;H0YB03;E5RGC8;H0YC27;H0YC67;H0YBD9;H0YAP5	E5RH53;Q96DB5;H0YB83;H0YB03	Regulator of microtubule dynamics protein 1	RMDN1	780	tr|E5RH53|E5RH53_HUMAN Regulator of microtubule dynamics protein 1 OS=Homo sapiens OX=9606 GN=RMDN1 PE=1 SV=1;sp|Q96DB5|RMD1_HUMAN Regulator of microtubule dynamics protein 1 OS=Homo sapiens OX=9606 GN=RMDN1 PE=1 SV=1;tr|H0YB83|H0YB83_HUMAN Regulator of mi
25.8413	NaN	NaN	NaN	NaN	NaN	25.6287	NaN	25.9533	25.7256	NaN	NaN	NaN	NaN	NaN			15	4	4	41.2	14.3	14.3	49.129	0	18.378	343810000	10	25.7872	25.8413	25.7692	NaN	4	1	3	0	1	0.0720876	0	O00148;K7EQN7;K7EN69;K7ENP6;K7EL56;K7EIL8;K7EPJ3;F6SXL5;A0A0D9SEM9	O00148;K7EQN7	ATP-dependent RNA helicase DDX39A	DDX39A	1285	sp|O00148|DX39A_HUMAN ATP-dependent RNA helicase DDX39A OS=Homo sapiens OX=9606 GN=DDX39A PE=1 SV=2;tr|K7EQN7|K7EQN7_HUMAN RNA helicase (Fragment) OS=Homo sapiens OX=9606 GN=DDX39A PE=1 SV=1
26.0607	NaN	NaN	NaN	NaN	NaN	NaN	25.6344	26.6528	25.628	NaN	NaN	NaN	NaN	NaN			5	5	5	6.9	6.9	6.9	81.661	0	18.848	379480000	23	25.994	26.0607	25.9718	NaN	4	1	3	0	1	0.0889327	0	P50443	P50443	Sulfate transporter	SLC26A2	2226	sp|P50443|S26A2_HUMAN Sulfate transporter OS=Homo sapiens OX=9606 GN=SLC26A2 PE=1 SV=2
24.7774	NaN	NaN	NaN	NaN	24.2747	24.8	NaN	NaN	24.8877	NaN	NaN	NaN	NaN	NaN			2	2	2	9	9	9	18.661	0	6.6773	174000000	4	24.6849	24.7774	24.6541	NaN	4	1	3	0	1	0.123236	0	E9PNK6;E9PPQ1;J3KNE7;Q16890	E9PNK6;E9PPQ1;J3KNE7;Q16890	Tumor protein D53	TPD52L1	902	tr|E9PNK6|E9PNK6_HUMAN Tumor protein D53 OS=Homo sapiens OX=9606 GN=TPD52L1 PE=1 SV=1;tr|E9PPQ1|E9PPQ1_HUMAN Tumor protein D53 OS=Homo sapiens OX=9606 GN=TPD52L1 PE=1 SV=1;tr|J3KNE7|J3KNE7_HUMAN Tumor protein D53 OS=Homo sapiens OX=9606 GN=TPD52L1 PE=1 SV=
24.906	NaN	NaN	NaN	NaN	NaN	24.6442	24.6933	NaN	24.9352	NaN	NaN	NaN	NaN	NaN			3	3	3	36	36	36	10.135	0	25.947	172170000	6	24.7947	24.906	24.7576	NaN	4	1	3	0	1	0.148435	0	Q9BWJ5	Q9BWJ5	Splicing factor 3B subunit 5	SF3B5	3444	sp|Q9BWJ5|SF3B5_HUMAN Splicing factor 3B subunit 5 OS=Homo sapiens OX=9606 GN=SF3B5 PE=1 SV=1
24.7963	NaN	NaN	NaN	NaN	NaN	24.8358	24.4817	NaN	24.5593	NaN	NaN	NaN	NaN	NaN			9	9	9	21.1	21.1	21.1	60.207	0	50.881	265760000	29	24.6683	24.7963	24.6256	NaN	4	1	3	0	1	0.170758	0	Q7L5N7;H3BU68	Q7L5N7	Lysophosphatidylcholine acyltransferase 2	LPCAT2	2950	sp|Q7L5N7|PCAT2_HUMAN Lysophosphatidylcholine acyltransferase 2 OS=Homo sapiens OX=9606 GN=LPCAT2 PE=1 SV=1
25.6512	NaN	NaN	NaN	NaN	NaN	25.7547	25.2707	NaN	25.1517	NaN	NaN	NaN	NaN	NaN			3	3	3	5.4	5.4	5.4	101.29	0	10.145	171840000	11	25.4571	25.6512	25.3924	NaN	4	1	3	0	1	0.258821	0	P52735	P52735	Guanine nucleotide exchange factor VAV2	VAV2	2263	sp|P52735|VAV2_HUMAN Guanine nucleotide exchange factor VAV2 OS=Homo sapiens OX=9606 GN=VAV2 PE=1 SV=2
NaN	NaN	26.054	NaN	NaN	NaN	25.8858	25.3635	NaN	26.1298	NaN	NaN	NaN	NaN	NaN			4	4	4	10.8	10.8	10.8	74.89	0	11.199	424890000	8	25.8583	26.054	25.793	NaN	4	1	3	0	1	0.260995	0	Q15061;C9IZK7	Q15061	WD repeat-containing protein 43	WDR43	2702	sp|Q15061|WDR43_HUMAN WD repeat-containing protein 43 OS=Homo sapiens OX=9606 GN=WDR43 PE=1 SV=3
24.9372	NaN	NaN	NaN	NaN	24.6819	24.8044	NaN	NaN	24.5256	NaN	NaN	NaN	NaN	NaN			4	3	3	13	10.5	10.5	44.485	0	17.692	125420000	8	24.7373	24.9372	24.6706	NaN	4	1	3	0	1	0.266582	0	E9PCS8;E7EQY4;E7EV10;Q9BTC8;F6RRE2;E7ESY4;Q13330;H0YIT0;E9PF88;H0Y4T7	E9PCS8;E7EQY4;E7EV10;Q9BTC8;F6RRE2;E7ESY4;Q13330	Metastasis-associated protein MTA3;Metastasis-associated protein MTA1	MTA3;MTA1	809	tr|E9PCS8|E9PCS8_HUMAN Metastasis-associated protein MTA3 OS=Homo sapiens OX=9606 GN=MTA3 PE=1 SV=1;tr|E7EQY4|E7EQY4_HUMAN Metastasis-associated protein MTA3 OS=Homo sapiens OX=9606 GN=MTA3 PE=1 SV=1;tr|E7EV10|E7EV10_HUMAN Metastasis-associated protein MTA
25.8384	NaN	NaN	NaN	NaN	25.8001	25.5457	25.2469	NaN	NaN	NaN	NaN	NaN	NaN	NaN			3	3	3	25.3	25.3	25.3	20.016	0	12.283	338820000	16	25.6078	25.8384	25.5309	NaN	4	1	3	0	1	0.307529	0	P32321;D6RBJ9	P32321;D6RBJ9	Deoxycytidylate deaminase	DCTD	2034	sp|P32321|DCTD_HUMAN Deoxycytidylate deaminase OS=Homo sapiens OX=9606 GN=DCTD PE=1 SV=2;tr|D6RBJ9|D6RBJ9_HUMAN Deoxycytidylate deaminase (Fragment) OS=Homo sapiens OX=9606 GN=DCTD PE=1 SV=1
24.7444	NaN	NaN	NaN	NaN	NaN	24.5183	24.2413	NaN	24.3554	NaN	NaN	NaN	NaN	NaN			4	4	4	18.1	18.1	18.1	37.413	0	19.443	221040000	9	24.4649	24.7444	24.3717	NaN	4	1	3	0	1	0.372759	0	Q15599;H3BUQ9;H3BN50;H3BQS0	Q15599;H3BUQ9;H3BN50;H3BQS0	Na(+)/H(+) exchange regulatory cofactor NHE-RF2	SLC9A3R2	2731	sp|Q15599|NHRF2_HUMAN Na(+)/H(+) exchange regulatory cofactor NHE-RF2 OS=Homo sapiens OX=9606 GN=SLC9A3R2 PE=1 SV=2;tr|H3BUQ9|H3BUQ9_HUMAN Na(+)/H(+) exchange regulatory cofactor NHE-RF2 (Fragment) OS=Homo sapiens OX=9606 GN=SLC9A3R2 PE=1 SV=1;tr|H3BN50|H3
24.9692	NaN	NaN	NaN	NaN	24.3337	24.7892	NaN	NaN	24.2807	NaN	NaN	NaN	NaN	NaN			3	3	3	9.4	9.4	9.4	54.862	0	21.213	147810000	13	24.5932	24.9692	24.4679	NaN	4	1	3	0	1	0.501297	0	O94888;H7BYF4;C9JAT7	O94888	UBX domain-containing protein 7	UBXN7	1542	sp|O94888|UBXN7_HUMAN UBX domain-containing protein 7 OS=Homo sapiens OX=9606 GN=UBXN7 PE=1 SV=2
25.9151	NaN	NaN	NaN	NaN	25.1448	25.6532	NaN	NaN	25.365	NaN	NaN	NaN	25.7893	NaN			9	9	9	24	24	24	57.215	0	24.962	568410000	15	25.5735	25.9151	25.3877	25.7893	5	1	3	1	1	0.527452	0	K7EMM8;Q49A26;K7EQB2;K7EPU6	K7EMM8;Q49A26	Putative oxidoreductase GLYR1	GLYR1	1247	tr|K7EMM8|K7EMM8_HUMAN Glyoxylate reductase 1 homolog (Fragment) OS=Homo sapiens OX=9606 GN=GLYR1 PE=1 SV=2;sp|Q49A26|GLYR1_HUMAN Putative oxidoreductase GLYR1 OS=Homo sapiens OX=9606 GN=GLYR1 PE=1 SV=4
25.1553	NaN	NaN	NaN	NaN	NaN	24.5182	24.059	25.2419	NaN	NaN	NaN	NaN	NaN	NaN			5	5	5	10.9	10.9	10.9	79.744	0	18.605	170910000	11	24.7436	25.1553	24.6064	NaN	4	1	3	0	1	0.548891	0	Q9NUQ8	Q9NUQ8	ATP-binding cassette sub-family F member 3	ABCF3	3653	sp|Q9NUQ8|ABCF3_HUMAN ATP-binding cassette sub-family F member 3 OS=Homo sapiens OX=9606 GN=ABCF3 PE=1 SV=2
24.564	NaN	NaN	NaN	NaN	NaN	23.8394	23.7737	NaN	23.7332	NaN	NaN	NaN	NaN	NaN			2	2	2	21.8	21.8	21.8	14.872	0	6.9036	125710000	9	23.9776	24.564	23.7821	NaN	4	1	3	0	1	0.781818	0	H7C1N3;O15155;A0A3B3IU16;C9JTT8;Q68DU7	H7C1N3;O15155;A0A3B3IU16;C9JTT8;Q68DU7	BET1 homolog	BET1;DKFZp781C0425	1158	tr|H7C1N3|H7C1N3_HUMAN BET1 homolog (Fragment) OS=Homo sapiens OX=9606 GN=BET1 PE=1 SV=1;sp|O15155|BET1_HUMAN BET1 homolog OS=Homo sapiens OX=9606 GN=BET1 PE=1 SV=1;tr|A0A3B3IU16|A0A3B3IU16_HUMAN BET1 homolog OS=Homo sapiens OX=9606 GN=BET1 PE=1 SV=1;tr|C9
24.4087	NaN	NaN	NaN	NaN	NaN	24.4198	22.8498	NaN	23.5906	NaN	NaN	NaN	NaN	NaN			7	7	7	7.1	7.1	7.1	143.7	0	16.211	161220000	25	23.8172	24.4087	23.6201	NaN	4	1	3	0	1	0.788671	0	Q5JTH9;A0A087X1U8	Q5JTH9	RRP12-like protein	RRP12	2825	sp|Q5JTH9|RRP12_HUMAN RRP12-like protein OS=Homo sapiens OX=9606 GN=RRP12 PE=1 SV=2
25.5234	NaN	NaN	NaN	NaN	NaN	NaN	24.1547	24.7653	24.1941	NaN	NaN	24.8789	NaN	NaN			4	4	4	5.4	5.4	5.4	145.17	0	13.726	170560000	10	24.7033	25.5234	24.3714	24.8789	5	1	3	1	1	1.15204	0	Q96ST3	Q96ST3	Paired amphipathic helix protein Sin3a	SIN3A	3335	sp|Q96ST3|SIN3A_HUMAN Paired amphipathic helix protein Sin3a OS=Homo sapiens OX=9606 GN=SIN3A PE=1 SV=2
NaN	NaN	NaN	NaN	NaN	23.7125	NaN	24.1889	NaN	23.8844	NaN	NaN	NaN	NaN	NaN			5	5	5	10.1	10.1	10.1	74.34	0	13.959	109200000	6	23.9286	NaN	23.9286	NaN	3	0	3	0	1	NaN	0	F8W9B8;A0A0A0MSI8;O00471;G3V377	F8W9B8;A0A0A0MSI8;O00471	Exocyst complex component 5	EXOC5	148	tr|F8W9B8|F8W9B8_HUMAN Exocyst complex component 5 OS=Homo sapiens OX=9606 GN=EXOC5 PE=1 SV=1;tr|A0A0A0MSI8|A0A0A0MSI8_HUMAN Exocyst complex component 5 OS=Homo sapiens OX=9606 GN=EXOC5 PE=1 SV=1;sp|O00471|EXOC5_HUMAN Exocyst complex component 5 OS=Homo sa
NaN	NaN	NaN	NaN	NaN	26.1218	23.4154	NaN	NaN	24.9434	26.0476	25.6987	26.9363	26.0324	NaN			9	9	9	33.8	33.8	33.8	41.598	0	40.492	420770000	29	25.5994	NaN	24.8269	26.1787	7	0	3	4	1	NaN	0	A0A0D9SFB5;P08319;D6R9K8;D6RIB1;H0Y9N0	A0A0D9SFB5;P08319;D6R9K8	Alcohol dehydrogenase 4	ADH4	213	tr|A0A0D9SFB5|A0A0D9SFB5_HUMAN All-trans-retinol dehydrogenase [NAD(+)] ADH4 OS=Homo sapiens OX=9606 GN=ADH4 PE=1 SV=1;sp|P08319|ADH4_HUMAN All-trans-retinol dehydrogenase [NAD(+)] ADH4 OS=Homo sapiens OX=9606 GN=ADH4 PE=1 SV=5;tr|D6R9K8|D6R9K8_HUMAN All-t
NaN	NaN	NaN	NaN	NaN	NaN	24.9914	24.8176	NaN	25.1173	NaN	NaN	NaN	NaN	NaN			2	2	2	8.7	8.7	8.7	52.454	0	11.595	129970000	4	24.9755	NaN	24.9755	NaN	3	0	3	0	1	NaN	0	A0A3B3ITW1;P49841	A0A3B3ITW1;P49841	Glycogen synthase kinase-3 beta	GSK3B	364	tr|A0A3B3ITW1|A0A3B3ITW1_HUMAN Glycogen synthase kinase-3 beta OS=Homo sapiens OX=9606 GN=GSK3B PE=1 SV=1;sp|P49841|GSK3B_HUMAN Glycogen synthase kinase-3 beta OS=Homo sapiens OX=9606 GN=GSK3B PE=1 SV=2
NaN	NaN	NaN	NaN	NaN	NaN	24.9885	24.5542	NaN	25.6072	NaN	NaN	NaN	NaN	NaN			4	4	3	22.1	22.1	17.6	26.624	0	8.1038	137060000	5	25.05	NaN	25.05	NaN	3	0	3	0	1	NaN	0	J3QKW7;A8MZF9;P55039;J3QR71;J3QRI9;J3QL90;J3KRL5	J3QKW7;A8MZF9;P55039;J3QR71;J3QRI9	Developmentally-regulated GTP-binding protein 2	DRG2	473	tr|J3QKW7|J3QKW7_HUMAN Developmentally-regulated GTP-binding protein 2 OS=Homo sapiens OX=9606 GN=DRG2 PE=1 SV=1;tr|A8MZF9|A8MZF9_HUMAN Developmentally-regulated GTP-binding protein 2 OS=Homo sapiens OX=9606 GN=DRG2 PE=1 SV=1;sp|P55039|DRG2_HUMAN Developme
NaN	NaN	NaN	NaN	NaN	25.5174	NaN	26.032	NaN	25.6676	NaN	NaN	NaN	NaN	NaN			3	3	3	11.6	11.6	11.6	48.076	0	9.7306	422570000	16	25.739	NaN	25.739	NaN	3	0	3	0	1	NaN	0	O95630;C9JK83;F5H5B9	O95630;C9JK83	STAM-binding protein	STAMBP	614	sp|O95630|STABP_HUMAN STAM-binding protein OS=Homo sapiens OX=9606 GN=STAMBP PE=1 SV=1;tr|C9JK83|C9JK83_HUMAN STAM-binding protein (Fragment) OS=Homo sapiens OX=9606 GN=STAMBP PE=1 SV=1
NaN	NaN	NaN	NaN	NaN	NaN	23.9536	24.2372	NaN	23.6851	NaN	NaN	NaN	NaN	NaN			3	3	3	6.1	6.1	6.1	77.942	0	14.253	92900000	11	23.9586	NaN	23.9586	NaN	3	0	3	0	1	NaN	0	H3BSH7;Q969X6;H3BPD7;I3L4T9;J3KSE6;J3KTR0;J3KSI1;A0A0J9YXV4;A0A0J9YWK2;A0A0J9YWM9	H3BSH7;Q969X6;H3BPD7;I3L4T9	Cirhin	CIRH1A	1125	tr|H3BSH7|H3BSH7_HUMAN U3 small nucleolar RNA-associated protein 4 homolog (Fragment) OS=Homo sapiens OX=9606 GN=UTP4 PE=1 SV=1;sp|Q969X6|UTP4_HUMAN U3 small nucleolar RNA-associated protein 4 homolog OS=Homo sapiens OX=9606 GN=UTP4 PE=1 SV=1;tr|H3BPD7|H3B
NaN	NaN	NaN	NaN	NaN	25.0596	25.7284	25.4084	NaN	NaN	NaN	25.6325	26.0301	NaN	NaN			15	1	1	57	4.7	4.7	31.35	0	12.715	634040000	19	25.5718	NaN	25.3988	25.8313	5	0	3	2	1	NaN	0	P47756;B1AK85;A0A6I8PIN8	P47756;B1AK85	F-actin-capping protein subunit beta	CAPZB	2168	sp|P47756|CAPZB_HUMAN F-actin-capping protein subunit beta OS=Homo sapiens OX=9606 GN=CAPZB PE=1 SV=4;tr|B1AK85|B1AK85_HUMAN F-actin-capping protein subunit beta OS=Homo sapiens OX=9606 GN=CAPZB PE=1 SV=1
NaN	NaN	NaN	NaN	NaN	NaN	25.7395	24.7642	NaN	25.3309	NaN	NaN	NaN	NaN	NaN			4	4	4	10.9	10.9	10.9	59.763	0	15.821	313630000	20	25.2782	NaN	25.2782	NaN	3	0	3	0	1	NaN	0	Q92828	Q92828	Coronin-2A	CORO2A	3195	sp|Q92828|COR2A_HUMAN Coronin-2A OS=Homo sapiens OX=9606 GN=CORO2A PE=1 SV=2
NaN	NaN	NaN	NaN	NaN	27.4988	NaN	26.5282	NaN	26.3563	NaN	27.1317	NaN	27.2709	NaN			4	4	4	49.5	49.5	49.5	10.834	0	53.042	1205300000	23	26.9572	NaN	26.7944	27.2013	5	0	3	2	1	NaN	0	Q9Y333	Q9Y333	U6 snRNA-associated Sm-like protein LSm2	LSM2	3881	sp|Q9Y333|LSM2_HUMAN U6 snRNA-associated Sm-like protein LSm2 OS=Homo sapiens OX=9606 GN=LSM2 PE=1 SV=1
NaN	NaN	NaN	NaN	NaN	25.2622	23.7488	23.2295	NaN	NaN	NaN	NaN	NaN	NaN	NaN			10	10	10	14.3	14.3	14.3	102.12	0	23.737	164690000	28	24.0802	NaN	24.0802	NaN	3	0	3	0	1	NaN	0	Q9Y4C2	Q9Y4C2	TRPM8 channel-associated factor 1	TCAF1	3904	sp|Q9Y4C2|TCAF1_HUMAN TRPM8 channel-associated factor 1 OS=Homo sapiens OX=9606 GN=TCAF1 PE=1 SV=3
25.9152	26.5694	25.821	25.2175	25.921	27.9098	26.578	NaN	27.1785	26.3656	27.0627	28.6402	27.9456	27.3278	NaN	+	3NT_Control	6	6	6	55.1	55.1	55.1	22.337	0	22.65	1150300000	22	26.804	25.8888	27.008	27.7441	13	5	4	4	0.0238852	-1.11911	-2.87312	Q96AB3;K7EKW4;K7ENV7	Q96AB3;K7EKW4;K7ENV7	Isochorismatase domain-containing protein 2, mitochondrial	ISOC2	3229	sp|Q96AB3|ISOC2_HUMAN Isochorismatase domain-containing protein 2 OS=Homo sapiens OX=9606 GN=ISOC2 PE=1 SV=1;tr|K7EKW4|K7EKW4_HUMAN Isochorismatase domain-containing protein 2 (Fragment) OS=Homo sapiens OX=9606 GN=ISOC2 PE=1 SV=1;tr|K7ENV7|K7ENV7_HUMAN Iso
24.6502	24.76	24.0807	24.631	24.2057	24.7234	NaN	24.6386	25.4365	25.2404	NaN	25.6036	25.4199	24.7632	NaN	+	3NT_Control	11	11	11	7.7	7.7	7.7	208.83	0	20.586	440600000	30	24.8461	24.4655	25.0097	25.2622	12	5	4	3	0.0494707	-0.544197	-2.37186	A0A3B3IUD7;Q14690	A0A3B3IUD7;Q14690	Protein RRP5 homolog	PDCD11	375	tr|A0A3B3IUD7|A0A3B3IUD7_HUMAN Programmed cell death 11, isoform CRA_a OS=Homo sapiens OX=9606 GN=PDCD11 PE=1 SV=1;sp|Q14690|RRP5_HUMAN Protein RRP5 homolog OS=Homo sapiens OX=9606 GN=PDCD11 PE=1 SV=3
26.7036	26.7594	26.8809	27.0035	27.0398	NaN	27.3188	27.0969	27.1839	27.4312	NaN	NaN	NaN	26.116	NaN	+	3NT_Control	8	8	8	76.5	76.5	76.5	14.644	0	161	1742000000	45	26.9534	26.8774	27.2577	26.116	10	5	4	1	0.00627199	-0.380263	-3.85251	P05162	P05162	Galectin-2	LGALS2	1664	sp|P05162|LEG2_HUMAN Galectin-2 OS=Homo sapiens OX=9606 GN=LGALS2 PE=1 SV=3
27.118	26.9721	27.1353	27.1426	27.353	NaN	26.9225	26.4212	26.906	26.938	NaN	NaN	25.0781	NaN	NaN	+	3NT_Control	10	2	0	16.7	2.6	0	72.572	0	20.511	1139900000	26	26.7987	27.1442	26.7969	25.0781	10	5	4	1	0.0318956	0.347281	2.67225	Q5T9A4;A0A5K1VW56	Q5T9A4;A0A5K1VW56	ATPase family AAA domain-containing protein 3B	ATAD3B	2858	sp|Q5T9A4|ATD3B_HUMAN ATPase family AAA domain-containing protein 3B OS=Homo sapiens OX=9606 GN=ATAD3B PE=1 SV=1;tr|A0A5K1VW56|A0A5K1VW56_HUMAN ATPase family AAA domain-containing protein 3B OS=Homo sapiens OX=9606 GN=ATAD3B PE=1 SV=1
26.5678	26.4617	26.4348	26.4397	26.3691	NaN	25.8771	26.1052	26.2791	26.0264	NaN	NaN	NaN	NaN	NaN	+	3NT_Control	4	4	4	24	24	24	33.281	0	74.567	575730000	18	26.2845	26.4546	26.072	NaN	9	5	4	0	0.00231419	0.382643	4.66012	E9PJH7;Q9H936;A0A0D9SFE1;K4DIB8;K4DIA8;E9PS95;A0A0D9SEI9	E9PJH7;Q9H936;A0A0D9SFE1;K4DIB8;K4DIA8;E9PS95;A0A0D9SEI9	Mitochondrial glutamate carrier 1	SLC25A22	873	tr|E9PJH7|E9PJH7_HUMAN Mitochondrial glutamate carrier 1 (Fragment) OS=Homo sapiens OX=9606 GN=SLC25A22 PE=1 SV=5;sp|Q9H936|GHC1_HUMAN Mitochondrial glutamate carrier 1 OS=Homo sapiens OX=9606 GN=SLC25A22 PE=1 SV=1;tr|A0A0D9SFE1|A0A0D9SFE1_HUMAN Mitochondr
26.007	26.3	26.3136	26.2082	26.2235	NaN	26.0777	26.0884	25.5953	25.4326	25.5967	25.6649	25.994	NaN	NaN	+	3NT_Control	5	5	5	22.5	22.5	22.5	40.313	0	135.79	819110000	29	25.9585	26.2104	25.7985	25.7519	12	5	4	3	0.0366243	0.411937	2.57715	Q9BWF3;E9PB51;E9PLB0;E9PM61;D6R9K7;U3KQD5;J3QRR5;Q9BQ04	Q9BWF3;E9PB51;E9PLB0;E9PM61;D6R9K7;U3KQD5;J3QRR5;Q9BQ04	RNA-binding protein 4;RNA-binding protein 4B	RBM4;RBM4B	3443	sp|Q9BWF3|RBM4_HUMAN RNA-binding protein 4 OS=Homo sapiens OX=9606 GN=RBM4 PE=1 SV=1;tr|E9PB51|E9PB51_HUMAN RNA-binding protein 4 (Fragment) OS=Homo sapiens OX=9606 GN=RBM4 PE=1 SV=1;tr|E9PLB0|E9PLB0_HUMAN RNA-binding protein 4B OS=Homo sapiens OX=9606 GN=
25.426	25.4389	25.3001	25.455	25.5231	NaN	25.3503	24.9514	24.8254	24.892	25.4554	25.5274	24.9712	25.3635	NaN	+	3NT_Control	11	11	11	18.9	18.9	18.9	96.557	0	58.187	744370000	35	25.2677	25.4286	25.0048	25.3294	13	5	4	4	0.00670309	0.423867	3.80134	Q8IY81	Q8IY81	pre-rRNA processing protein FTSJ3	FTSJ3	3023	sp|Q8IY81|SPB1_HUMAN pre-rRNA 2-O-ribose RNA methyltransferase FTSJ3 OS=Homo sapiens OX=9606 GN=FTSJ3 PE=1 SV=2
27.8386	27.7669	27.8216	28.3759	28.0021	27.3972	27.2178	27.5246	NaN	27.5643	27.7199	27.6989	NaN	27.4402	NaN	+	3NT_Control	2	2	2	30	30	30	10.999	0	63.781	2002100000	35	27.6973	27.961	27.426	27.6196	12	5	4	3	0.00729877	0.535019	3.73623	A0A1W2PQV2;H3BUH9;P23434	A0A1W2PQV2;H3BUH9;P23434	Glycine cleavage system H protein, mitochondrial	GCSH	290	tr|A0A1W2PQV2|A0A1W2PQV2_HUMAN Glycine cleavage system H protein, mitochondrial (Fragment) OS=Homo sapiens OX=9606 GN=GCSH PE=1 SV=1;tr|H3BUH9|H3BUH9_HUMAN Glycine cleavage system H protein, mitochondrial (Fragment) OS=Homo sapiens OX=9606 GN=GCSH PE=1 SV=
25.3788	26.0135	25.8137	26.4401	26.3808	NaN	25.325	25.5468	25.6053	25.2004	25.0389	25.5382	NaN	NaN	NaN	+	3NT_Control	6	6	6	35.6	35.6	35.6	25.384	0	19.061	617600000	18	25.662	26.0054	25.4194	25.2885	11	5	4	2	0.0420782	0.585998	2.48214	Q8TAE8	Q8TAE8	Growth arrest and DNA damage-inducible proteins-interacting protein 1	GADD45GIP1	3109	sp|Q8TAE8|G45IP_HUMAN Growth arrest and DNA damage-inducible proteins-interacting protein 1 OS=Homo sapiens OX=9606 GN=GADD45GIP1 PE=1 SV=1
23.7014	23.7881	23.6078	22.5207	22.9435	28.1784	22.6593	23.1639	NaN	22.542	27.8805	28.3802	29.8188	28.8086	NaN			21	19	18	54	47.7	46.5	61.963	0	101.23	2911400000	84	25.2302	23.3123	24.1359	28.722	13	5	4	4	0.522019	-0.823578	-0.673866	Q14195;H0YBT4;D6RF19;H0YB87	Q14195	Dihydropyrimidinase-related protein 3	DPYSL3	2651	sp|Q14195|DPYL3_HUMAN Dihydropyrimidinase-related protein 3 OS=Homo sapiens OX=9606 GN=DPYSL3 PE=1 SV=1
25.3951	24.0211	23.7715	25.007	25.5301	NaN	26.1844	24.9129	25.7558	25.0618	NaN	NaN	NaN	NaN	NaN			5	5	3	18	18	11	43.573	0	21.918	438340000	36	25.0711	24.745	25.4787	NaN	9	5	4	0	0.173503	-0.733761	-1.51518	Q9NTG7;E9PK80;E9PM75;E9PN58;B7WNN4	Q9NTG7;E9PK80;E9PM75;E9PN58	NAD-dependent protein deacetylase sirtuin-3, mitochondrial	SIRT3	3646	sp|Q9NTG7|SIR3_HUMAN NAD-dependent protein deacetylase sirtuin-3, mitochondrial OS=Homo sapiens OX=9606 GN=SIRT3 PE=1 SV=2;tr|E9PK80|E9PK80_HUMAN NAD-dependent protein deacetylase OS=Homo sapiens OX=9606 GN=SIRT3 PE=1 SV=1;tr|E9PM75|E9PM75_HUMAN NAD-depend
25.1501	24.6987	25.0784	23.7499	23.9658	25.7324	24.969	24.8682	NaN	24.9979	23.928	25.4443	25.3305	26.6136	NaN			6	6	6	17.3	17.3	17.3	52.787	0	37.007	565870000	36	24.9636	24.5286	25.1419	25.3291	13	5	4	4	0.140209	-0.613284	-1.66327	Q5R3I4;A9UJP8;H7C2L7;H7C089	Q5R3I4;A9UJP8;H7C2L7	Tetratricopeptide repeat protein 38	TTC38	2836	sp|Q5R3I4|TTC38_HUMAN Tetratricopeptide repeat protein 38 OS=Homo sapiens OX=9606 GN=TTC38 PE=1 SV=1;tr|A9UJP8|A9UJP8_HUMAN Tetratricopeptide repeat protein 38 (Fragment) OS=Homo sapiens OX=9606 GN=TTC38 PE=1 SV=1;tr|H7C2L7|H7C2L7_HUMAN Tetratricopeptide r
27.8545	28.3821	27.9697	27.1613	27.302	NaN	27.9728	28.5626	28.0846	28.6254	NaN	NaN	NaN	NaN	NaN			8	8	7	21.6	21.6	17.8	70.754	0	75.243	2571500000	45	27.9906	27.7339	28.3114	NaN	9	5	4	0	0.0891106	-0.57744	-1.97289	Q13492;E9PI56;E9PKP6;E9PLJ8;E5RFU0;E5RHK9;E5RFC6;E5RK51;E5RIJ5;H0YCY1;E5RGY9;E9PDG8;O60641	Q13492;E9PI56;E9PKP6;E9PLJ8	Phosphatidylinositol-binding clathrin assembly protein	PICALM	2611	sp|Q13492|PICAL_HUMAN Phosphatidylinositol-binding clathrin assembly protein OS=Homo sapiens OX=9606 GN=PICALM PE=1 SV=2;tr|E9PI56|E9PI56_HUMAN Phosphatidylinositol-binding clathrin assembly protein (Fragment) OS=Homo sapiens OX=9606 GN=PICALM PE=1 SV=8;tr
26.0736	25.9952	25.7985	24.5504	25.8339	26.874	25.9443	26.1011	NaN	25.8453	26.0992	26.0896	26.2845	26.4926	NaN			5	5	5	14.8	14.8	14.8	78.365	0	91.094	995690000	31	25.9986	25.6503	26.1912	26.2415	13	5	4	4	0.19518	-0.540871	-1.43223	Q14444;E9PLA9;G3V153	Q14444;E9PLA9;G3V153	Caprin-1	CAPRIN1	2666	sp|Q14444|CAPR1_HUMAN Caprin-1 OS=Homo sapiens OX=9606 GN=CAPRIN1 PE=1 SV=2;tr|E9PLA9|E9PLA9_HUMAN Caprin-1 (Fragment) OS=Homo sapiens OX=9606 GN=CAPRIN1 PE=1 SV=1;tr|G3V153|G3V153_HUMAN Caprin-1 OS=Homo sapiens OX=9606 GN=CAPRIN1 PE=1 SV=1
25.5729	26.4472	25.8141	26.0908	25.3155	26.2647	NaN	26.3795	26.2968	26.5573	26.3116	26.0365	25.4851	25.5939	NaN			7	7	7	14.3	14.3	14.3	88.067	0	40.783	578960000	26	26.0128	25.8481	26.3746	25.8568	13	5	4	4	0.056697	-0.526462	-2.27927	P40763;G8JLH9;K7EP08	P40763;G8JLH9	Signal transducer and activator of transcription 3;Signal transducer and activator of transcription	STAT3	2107	sp|P40763|STAT3_HUMAN Signal transducer and activator of transcription 3 OS=Homo sapiens OX=9606 GN=STAT3 PE=1 SV=2;tr|G8JLH9|G8JLH9_HUMAN Signal transducer and activator of transcription OS=Homo sapiens OX=9606 GN=STAT3 PE=1 SV=1
25.5002	25.2182	25.9936	26.0372	25.5755	NaN	25.9788	25.9811	26.6451	26.0321	NaN	25.7643	NaN	NaN	NaN			7	7	7	15.6	15.6	15.6	70.729	0	102.77	922130000	30	25.8726	25.6649	26.1593	25.7643	10	5	4	1	0.0653722	-0.49435	-2.18278	Q9UHB9	Q9UHB9	Signal recognition particle subunit SRP68	SRP68	3757	sp|Q9UHB9|SRP68_HUMAN Signal recognition particle subunit SRP68 OS=Homo sapiens OX=9606 GN=SRP68 PE=1 SV=2
25.8608	25.2743	25.3166	24.6027	25.4123	NaN	26.0936	25.5697	25.6118	25.6619	NaN	NaN	25.0953	NaN	NaN			4	4	4	9	9	9	37.205	0	28.117	595500000	32	25.4499	25.2933	25.7343	25.0953	10	5	4	1	0.124077	-0.440923	-1.74732	Q9H3K2	Q9H3K2	Growth hormone-inducible transmembrane protein	GHITM	3516	sp|Q9H3K2|GHITM_HUMAN Growth hormone-inducible transmembrane protein OS=Homo sapiens OX=9606 GN=GHITM PE=1 SV=2
27.3341	27.5818	27.2683	26.9317	27.0611	28.6725	27.3324	27.1348	NaN	27.3046	27.262	27.7387	28.018	28.0265	NaN			9	9	9	39.8	39.8	39.8	35.536	0	28.345	1028600000	30	27.5128	27.2354	27.6111	27.7613	13	5	4	4	0.303264	-0.375663	-1.11101	Q53FA7;H7BZH6	Q53FA7	Quinone oxidoreductase PIG3	TP53I3	2805	sp|Q53FA7|QORX_HUMAN Quinone oxidoreductase PIG3 OS=Homo sapiens OX=9606 GN=TP53I3 PE=1 SV=2
27.1149	27.7695	27.565	28.647	28.0978	29.2343	27.7723	27.1793	28.671	NaN	27.6417	NaN	NaN	26.7035	NaN			6	6	6	18.4	18.4	18.4	45.112	0	16.464	1642900000	31	27.8542	27.8388	28.2142	27.1726	11	5	4	2	0.474552	-0.375397	-0.755581	A0A0C4DG44;O43464;P83110	A0A0C4DG44;O43464	Serine protease HTRA2, mitochondrial	HTRA2	191	tr|A0A0C4DG44|A0A0C4DG44_HUMAN Serine protease HTRA2, mitochondrial (Fragment) OS=Homo sapiens OX=9606 GN=HTRA2 PE=1 SV=1;sp|O43464|HTRA2_HUMAN Serine protease HTRA2, mitochondrial OS=Homo sapiens OX=9606 GN=HTRA2 PE=1 SV=2
29.9502	29.0437	28.583	28.9652	29.3707	NaN	29.8685	29.0753	29.7241	29.507	31.4113	NaN	30.9708	31.2171	NaN			17	17	17	12.5	12.5	12.5	245.44	0	91.902	8450700000	85	29.8072	29.1826	29.5437	31.1998	12	5	4	3	0.269228	-0.361168	-1.19985	E7EVA0;P27816;H7C456;H0Y2V1;H7C4C5;F8W9U4;A0A0J9YVV8;A0A0J9YW37;B5MEG9	E7EVA0;P27816	Microtubule-associated protein;Microtubule-associated protein 4	MAP4	823	tr|E7EVA0|E7EVA0_HUMAN Microtubule-associated protein OS=Homo sapiens OX=9606 GN=MAP4 PE=1 SV=1;sp|P27816|MAP4_HUMAN Microtubule-associated protein 4 OS=Homo sapiens OX=9606 GN=MAP4 PE=1 SV=3
24.7685	24.9168	25.2099	24.6059	24.9106	25.59	25.2257	25.184	NaN	24.8874	NaN	25.4716	24.9676	25.6289	NaN			5	5	5	13.4	13.4	13.4	56.415	0	22.991	399100000	27	25.1139	24.8823	25.2218	25.356	12	5	4	3	0.0854588	-0.339443	-2.00127	Q8N465;B5MCV2;H7C0N1;G5E9E8;H7C021;F8WCF9	Q8N465;B5MCV2	D-2-hydroxyglutarate dehydrogenase, mitochondrial	D2HGDH	3051	sp|Q8N465|D2HDH_HUMAN D-2-hydroxyglutarate dehydrogenase, mitochondrial OS=Homo sapiens OX=9606 GN=D2HGDH PE=1 SV=3;tr|B5MCV2|B5MCV2_HUMAN D-2-hydroxyglutarate dehydrogenase, mitochondrial OS=Homo sapiens OX=9606 GN=D2HGDH PE=1 SV=1
25.9171	26.7205	25.9242	25.3349	26.6421	NaN	26.0445	26.0658	27.2078	26.4645	NaN	NaN	26.1196	25.9351	NaN			5	5	5	39.4	39.4	39.4	33.24	0	41.396	874640000	21	26.216	26.1078	26.4456	26.0273	11	5	4	2	0.400289	-0.337874	-0.89545	Q96QR8	Q96QR8	Transcriptional activator protein Pur-beta	PURB	3324	sp|Q96QR8|PURB_HUMAN Transcriptional activator protein Pur-beta OS=Homo sapiens OX=9606 GN=PURB PE=1 SV=3
25.9499	24.3023	24.8546	23.8563	24.1216	NaN	25.2578	24.9754	24.2177	25.2042	NaN	NaN	NaN	NaN	NaN			11	11	5	39	39	18	44.424	0	160.17	678750000	38	24.7489	24.6169	24.9138	NaN	9	5	4	0	0.548381	-0.296816	-0.630514	P36507;G5E9C7;M0R1B6	P36507	Dual specificity mitogen-activated protein kinase kinase 2	MAP2K2	2076	sp|P36507|MP2K2_HUMAN Dual specificity mitogen-activated protein kinase kinase 2 OS=Homo sapiens OX=9606 GN=MAP2K2 PE=1 SV=1
25.5267	24.9649	25.528	25.2681	25.2922	NaN	25.6633	25.3405	25.3675	26.0507	NaN	NaN	25.051	24.1952	NaN			7	7	7	20.3	20.3	20.3	55.435	0	54.398	691800000	28	25.2953	25.316	25.6055	24.6231	11	5	4	2	0.165481	-0.289493	-1.54829	Q7Z3B4	Q7Z3B4	Nucleoporin p54	NUP54	2959	sp|Q7Z3B4|NUP54_HUMAN Nucleoporin p54 OS=Homo sapiens OX=9606 GN=NUP54 PE=1 SV=2
25.638	24.9081	24.9313	23.8391	24.1181	24.6263	25.6783	24.96	NaN	24.5995	NaN	24.1441	23.6707	NaN	NaN			6	6	6	19	19	19	61.494	0	32.206	502090000	21	24.6467	24.6869	24.966	23.9074	11	5	4	2	0.532531	-0.279118	-0.656421	Q13573;G3V3A4;G3V4X8;G3V5R3	Q13573;G3V3A4;G3V4X8	SNW domain-containing protein 1	SNW1	2619	sp|Q13573|SNW1_HUMAN SNW domain-containing protein 1 OS=Homo sapiens OX=9606 GN=SNW1 PE=1 SV=1;tr|G3V3A4|G3V3A4_HUMAN SNW domain-containing protein 1 OS=Homo sapiens OX=9606 GN=SNW1 PE=1 SV=1;tr|G3V4X8|G3V4X8_HUMAN SNW domain-containing protein 1 OS=Homo s
25.4079	24.9115	24.7246	24.3709	25.4802	NaN	25.3907	25.2391	25.1958	25.1641	NaN	NaN	NaN	NaN	NaN			8	8	8	16.4	16.4	16.4	87.133	0	32.634	542340000	23	25.0983	24.979	25.2475	NaN	9	5	4	0	0.302363	-0.268439	-1.11325	Q14694;J3KT19;H3BNA1;H3BNL0;Q68D90;H3BNS8;H3BQP1;H3BVF1	Q14694	Ubiquitin carboxyl-terminal hydrolase 10	USP10	2679	sp|Q14694|UBP10_HUMAN Ubiquitin carboxyl-terminal hydrolase 10 OS=Homo sapiens OX=9606 GN=USP10 PE=1 SV=2
26.9862	26.9584	26.7062	26.1168	26.7629	NaN	27.1312	27.2022	26.5946	26.9009	24.983	25.4841	25.9618	25.8996	NaN			7	7	7	38.4	38.4	38.4	38.449	0	122.61	1957100000	61	26.4375	26.7061	26.9572	25.5821	13	5	4	4	0.280541	-0.251132	-1.16933	Q9UBE0;M0QZS6;A0A590UK93;A0A590UKC5;B3KNJ4;M0QX65;A0A590UKA0;M0QYM8;M0R054;M0R375;M0R286	Q9UBE0;M0QZS6;A0A590UK93;A0A590UKC5;B3KNJ4	SUMO-activating enzyme subunit 1;SUMO-activating enzyme subunit 1, N-terminally processed	SAE1	3732	sp|Q9UBE0|SAE1_HUMAN SUMO-activating enzyme subunit 1 OS=Homo sapiens OX=9606 GN=SAE1 PE=1 SV=1;tr|M0QZS6|M0QZS6_HUMAN SUMO-activating enzyme subunit 1 OS=Homo sapiens OX=9606 GN=SAE1 PE=1 SV=1;tr|A0A590UK93|A0A590UK93_HUMAN SUMO-activating enzyme subunit
26.1706	25.6582	26.1565	26.4262	25.5009	NaN	26.474	26.4289	25.659	26.3245	NaN	NaN	NaN	NaN	NaN			6	6	6	27.9	27.9	27.9	35.632	0	85.646	1238000000	25	26.0888	25.9825	26.2216	NaN	9	5	4	0	0.384416	-0.239123	-0.927738	Q99795;A0A0J9YXH7	Q99795	Cell surface A33 antigen	GPA33	3370	sp|Q99795|GPA33_HUMAN Cell surface A33 antigen OS=Homo sapiens OX=9606 GN=GPA33 PE=1 SV=1
26.6424	25.9419	25.857	25.6484	26.6653	NaN	26.6796	26.5711	25.7131	26.5859	25.3769	25.659	25.5907	25.8376	NaN			3	3	3	38.7	38.7	38.7	11.731	0	14.907	865350000	23	26.0591	26.151	26.3874	25.616	13	5	4	4	0.471576	-0.236441	-0.760882	Q9Y2R0;K7EPV0	Q9Y2R0;K7EPV0	Cytochrome c oxidase assembly factor 3 homolog, mitochondrial	COA3	3863	sp|Q9Y2R0|COA3_HUMAN Cytochrome c oxidase assembly factor 3 homolog, mitochondrial OS=Homo sapiens OX=9606 GN=COA3 PE=1 SV=1;tr|K7EPV0|K7EPV0_HUMAN Cytochrome c oxidase assembly factor 3 homolog, mitochondrial OS=Homo sapiens OX=9606 GN=COA3 PE=1 SV=1
25.2702	25.6548	25.0568	24.9666	25.5697	NaN	25.2001	25.6321	25.5927	25.7326	25.9954	25.6572	NaN	26.0585	NaN			6	5	5	36.7	30.1	30.1	19.171	0	66.248	407910000	30	25.5322	25.3036	25.5394	25.9037	12	5	4	3	0.243666	-0.235775	-1.27299	Q8TD06;H7C040;B5MC62	Q8TD06;H7C040;B5MC62	Anterior gradient protein 3 homolog	AGR3	3122	sp|Q8TD06|AGR3_HUMAN Anterior gradient protein 3 OS=Homo sapiens OX=9606 GN=AGR3 PE=1 SV=1;tr|H7C040|H7C040_HUMAN Anterior gradient protein 3 (Fragment) OS=Homo sapiens OX=9606 GN=AGR3 PE=1 SV=1;tr|B5MC62|B5MC62_HUMAN Anterior gradient protein 3 OS=Homo sa
25.1834	24.7488	25.3198	24.6955	24.9818	NaN	25.6904	25.1567	25.0824	24.9351	NaN	NaN	NaN	NaN	NaN			12	12	12	25	25	25	69.223	0	56.043	873510000	31	25.0882	24.9858	25.2162	NaN	9	5	4	0	0.285218	-0.230317	-1.15702	O76031;H0YM48;H0YK07	O76031	ATP-dependent Clp protease ATP-binding subunit clpX-like, mitochondrial	CLPX	1531	sp|O76031|CLPX_HUMAN ATP-dependent Clp protease ATP-binding subunit clpX-like, mitochondrial OS=Homo sapiens OX=9606 GN=CLPX PE=1 SV=2
29.6358	29.1547	29.0833	28.8896	29.186	NaN	29.3922	29.3193	29.1719	29.6604	NaN	NaN	NaN	27.9516	NaN			2	2	2	17.9	17.9	17.9	16.608	0	51.09	3931300000	34	29.1445	29.1899	29.3859	27.9516	10	5	4	1	0.275441	-0.196053	-1.18296	C9J719;C9JJ78;A0A494C0F3;Q15125	C9J719;C9JJ78;A0A494C0F3;Q15125	3-beta-hydroxysteroid-Delta(8),Delta(7)-isomerase	EBP	387	tr|C9J719|C9J719_HUMAN 3-beta-hydroxysteroid-Delta(8),Delta(7)-isomerase (Fragment) OS=Homo sapiens OX=9606 GN=EBP PE=1 SV=8;tr|C9JJ78|C9JJ78_HUMAN 3-beta-hydroxysteroid-Delta(8),Delta(7)-isomerase (Fragment) OS=Homo sapiens OX=9606 GN=EBP PE=1 SV=1;tr|A0A
26.0933	25.8548	25.8524	25.8203	26.0457	NaN	26.2557	26.0744	25.6911	26.4678	25.0229	25.2707	25.045	24.8012	NaN			8	8	8	28.5	28.5	28.5	40.589	0	28.529	886890000	32	25.715	25.9333	26.1222	25.035	13	5	4	4	0.271165	-0.188925	-1.19455	P17612;Q15136;A0A087WVC4;A0A0A0MS54;P22694;K7ERP6;B1APF7;B1APG1;B1APG0;B1APG2;B1APF8;B1APF9;B1APG3;K7ENJ5	P17612;Q15136;A0A087WVC4;A0A0A0MS54;P22694;K7ERP6	cAMP-dependent protein kinase catalytic subunit alpha;cAMP-dependent protein kinase catalytic subunit beta	PRKACA;KIN27;PRKACB	1862	sp|P17612|KAPCA_HUMAN cAMP-dependent protein kinase catalytic subunit alpha OS=Homo sapiens OX=9606 GN=PRKACA PE=1 SV=2;tr|Q15136|Q15136_HUMAN Protein kinase A-alpha (Fragment) OS=Homo sapiens OX=9606 GN=PRKACA PE=1 SV=1;tr|A0A087WVC4|A0A087WVC4_HUMAN cAMP
25.8045	25.4196	25.7095	25.5756	25.2468	NaN	25.5222	25.5737	26.0692	25.7894	25.1755	25.5042	25.5974	25.7422	NaN			11	11	11	12.3	12.3	12.3	138.68	0	38.402	995330000	50	25.5946	25.5512	25.7386	25.5048	13	5	4	4	0.272753	-0.187422	-1.19023	A0A087WUT6;O60841	A0A087WUT6;O60841	Eukaryotic translation initiation factor 5B	EIF5B	34	tr|A0A087WUT6|A0A087WUT6_HUMAN Eukaryotic translation initiation factor 5B OS=Homo sapiens OX=9606 GN=EIF5B PE=1 SV=1;sp|O60841|IF2P_HUMAN Eukaryotic translation initiation factor 5B OS=Homo sapiens OX=9606 GN=EIF5B PE=1 SV=4
25.0846	24.5818	25.1384	24.14	24.7502	25.5303	24.7451	24.8739	NaN	24.5527	25.1993	24.7562	24.6473	24.6007	NaN			3	3	3	23.1	23.1	23.1	11.985	0	15.75	448850000	27	24.8154	24.739	24.9255	24.8009	13	5	4	4	0.523936	-0.186477	-0.670667	E9PNW4;A0A2U3TZL5;P13987;H0YET2	E9PNW4;A0A2U3TZL5;P13987;H0YET2	CD59 glycoprotein	CD59	340	tr|E9PNW4|E9PNW4_HUMAN CD59 glycoprotein OS=Homo sapiens OX=9606 PE=1 SV=1;tr|A0A2U3TZL5|A0A2U3TZL5_HUMAN CD59 glycoprotein (Fragment) OS=Homo sapiens OX=9606 GN=CD59 PE=1 SV=1;sp|P13987|CD59_HUMAN CD59 glycoprotein OS=Homo sapiens OX=9606 GN=CD59 PE=1 SV=
26.8571	26.3906	26.5141	26.5181	26.3139	NaN	27.0989	27.0618	26.642	25.9894	NaN	NaN	25.2393	NaN	NaN			8	8	8	36.8	36.8	36.8	37.106	0	48.665	2166900000	39	26.4625	26.5188	26.698	25.2393	10	5	4	1	0.496395	-0.179246	-0.717345	O43852;H0Y875	O43852;H0Y875	Calumenin	CALU	1430	sp|O43852|CALU_HUMAN Calumenin OS=Homo sapiens OX=9606 GN=CALU PE=1 SV=2;tr|H0Y875|H0Y875_HUMAN Calumenin (Fragment) OS=Homo sapiens OX=9606 GN=CALU PE=1 SV=1
25.549	24.7074	24.891	24.6327	24.7616	25.1782	25.149	25.1763	NaN	24.8414	NaN	NaN	NaN	NaN	NaN			7	7	7	17.2	17.2	17.2	62.094	0	30.845	331750000	27	24.9874	24.9084	25.0862	NaN	9	5	4	0	0.405783	-0.177878	-0.884494	P19525;F8WBH4;C9JZT2	P19525	Interferon-induced, double-stranded RNA-activated protein kinase	EIF2AK2	1885	sp|P19525|E2AK2_HUMAN Interferon-induced, double-stranded RNA-activated protein kinase OS=Homo sapiens OX=9606 GN=EIF2AK2 PE=1 SV=2
26.1448	26.056	26.4649	25.8918	26.9631	NaN	26.3347	26.303	26.5484	26.7363	NaN	25.9826	NaN	26.103	NaN			3	3	3	43.2	43.2	43.2	13.832	0	29.973	1377500000	33	26.3208	26.3041	26.4806	26.0428	11	5	4	2	0.472303	-0.176501	-0.759585	Q9NRX4	Q9NRX4	14 kDa phosphohistidine phosphatase	PHPT1	3637	sp|Q9NRX4|PHP14_HUMAN 14 kDa phosphohistidine phosphatase OS=Homo sapiens OX=9606 GN=PHPT1 PE=1 SV=1
24.1544	25.4361	25.3174	25.2776	24.8009	NaN	24.9332	25.0155	25.6196	25.121	NaN	NaN	NaN	NaN	NaN			3	3	3	5.4	5.4	5.4	76.992	0	14.119	357960000	17	25.0751	24.9973	25.1723	NaN	9	5	4	0	0.578845	-0.175031	-0.581961	Q8IUC4;A8MT19	Q8IUC4	Rhophilin-2	RHPN2	3004	sp|Q8IUC4|RHPN2_HUMAN Rhophilin-2 OS=Homo sapiens OX=9606 GN=RHPN2 PE=1 SV=1
25.9119	25.5118	25.6672	25.9226	25.3799	NaN	25.6094	25.9578	26.0735	25.7332	NaN	NaN	NaN	NaN	NaN			13	13	13	20.8	20.8	20.8	102.97	0	95.93	1173300000	26	25.7519	25.6787	25.8435	NaN	9	5	4	0	0.317189	-0.164781	-1.077	Q86XP3;A0A0A0MSJ0;J3KRE3	Q86XP3;A0A0A0MSJ0	ATP-dependent RNA helicase DDX42	DDX42	149	sp|Q86XP3|DDX42_HUMAN ATP-dependent RNA helicase DDX42 OS=Homo sapiens OX=9606 GN=DDX42 PE=1 SV=1;tr|A0A0A0MSJ0|A0A0A0MSJ0_HUMAN RNA helicase OS=Homo sapiens OX=9606 GN=DDX42 PE=1 SV=1
25.4617	25.7317	25.6513	25.9572	25.7131	26.36	25.6781	NaN	25.4077	26.0036	25.5626	25.9337	26.5831	26.4547	NaN			11	11	11	28.8	28.8	28.8	66.921	0	36.156	712880000	32	25.8845	25.703	25.8623	26.1335	13	5	4	4	0.456041	-0.159364	-0.788924	B4DJ81;P28331	B4DJ81;P28331	NADH-ubiquinone oxidoreductase 75 kDa subunit, mitochondrial	NDUFS1	510	tr|B4DJ81|B4DJ81_HUMAN NADH-ubiquinone oxidoreductase 75 kDa subunit, mitochondrial OS=Homo sapiens OX=9606 GN=NDUFS1 PE=1 SV=1;sp|P28331|NDUS1_HUMAN NADH-ubiquinone oxidoreductase 75 kDa subunit, mitochondrial OS=Homo sapiens OX=9606 GN=NDUFS1 PE=1 SV=3
24.9709	25.1613	25.2572	25.5451	26.0348	NaN	25.4819	25.8065	25.4826	25.4361	NaN	25.4249	24.5699	24.7574	NaN			8	8	8	29	29	29	50.127	0	40.465	561060000	26	25.3274	25.3939	25.5518	24.9174	12	5	4	3	0.501697	-0.157906	-0.708231	Q96Q11;F8W8C3;A0A494C181;A0A494C1D4;A0A494C0A0;A0A494C0Y2;A0A494C1P4;C9JRS7;A0A494BZV5;A0A494C1L4	Q96Q11	CCA tRNA nucleotidyltransferase 1, mitochondrial	TRNT1	3321	sp|Q96Q11|TRNT1_HUMAN CCA tRNA nucleotidyltransferase 1, mitochondrial OS=Homo sapiens OX=9606 GN=TRNT1 PE=1 SV=2
25.9795	25.6263	25.4829	25.371	25.8948	NaN	25.9697	25.8329	25.6497	25.7915	NaN	NaN	NaN	NaN	NaN			9	9	9	17.6	17.6	17.6	76.749	0	26.404	537020000	26	25.7331	25.6709	25.811	NaN	9	5	4	0	0.36447	-0.1401	-0.969764	P17252;J3KRN5;P05771;M0R0I9;H3BV73;P05129	P17252;J3KRN5	Protein kinase C alpha type	PRKCA	1858	sp|P17252|KPCA_HUMAN Protein kinase C alpha type OS=Homo sapiens OX=9606 GN=PRKCA PE=1 SV=4;tr|J3KRN5|J3KRN5_HUMAN Protein kinase C alpha type OS=Homo sapiens OX=9606 GN=PRKCA PE=1 SV=1
25.8354	25.6322	25.5756	26.0153	25.19	NaN	25.6016	25.9714	25.745	25.8309	NaN	NaN	NaN	NaN	NaN			8	8	8	15.7	15.7	15.7	81.879	0	145.68	804090000	38	25.7108	25.6497	25.7872	NaN	9	5	4	0	0.448816	-0.137543	-0.802189	O00461;F8W785	O00461;F8W785	Golgi integral membrane protein 4	GOLIM4	1310	sp|O00461|GOLI4_HUMAN Golgi integral membrane protein 4 OS=Homo sapiens OX=9606 GN=GOLIM4 PE=1 SV=1;tr|F8W785|F8W785_HUMAN Golgi integral membrane protein 4 OS=Homo sapiens OX=9606 GN=GOLIM4 PE=1 SV=1
26.7131	26.7873	26.1412	24.7254	27.2486	NaN	25.9756	26.3416	26.6267	26.8737	NaN	25.4838	25.7717	NaN	NaN			2	2	2	56.8	56.8	56.8	8.0019	0	11.386	666440000	27	26.2444	26.3231	26.4544	25.6277	11	5	4	2	0.809057	-0.131289	-0.250954	Q96B49	Q96B49	Mitochondrial import receptor subunit TOM6 homolog	TOMM6	3238	sp|Q96B49|TOM6_HUMAN Mitochondrial import receptor subunit TOM6 homolog OS=Homo sapiens OX=9606 GN=TOMM6 PE=1 SV=1
27.2148	27.1262	26.0539	26.8666	26.8772	NaN	27.6385	26.6082	26.5424	27.012	26.6858	26.4895	26.315	26.244	NaN			6	6	6	26.9	26.9	26.9	38.242	0	92.552	1340300000	42	26.7442	26.8277	26.9503	26.4336	13	5	4	4	0.713929	-0.122548	-0.381809	Q9Y266;A0A0A0MSU9;A0A0A0MSS4	Q9Y266;A0A0A0MSU9;A0A0A0MSS4	Nuclear migration protein nudC	NUDC	3846	sp|Q9Y266|NUDC_HUMAN Nuclear migration protein nudC OS=Homo sapiens OX=9606 GN=NUDC PE=1 SV=1;tr|A0A0A0MSU9|A0A0A0MSU9_HUMAN Nuclear migration protein nudC (Fragment) OS=Homo sapiens OX=9606 GN=NUDC PE=1 SV=1;tr|A0A0A0MSS4|A0A0A0MSS4_HUMAN Nuclear migratio
26.4393	26.345	26.3281	26.4689	26.1923	NaN	26.7959	26.5284	26.2374	26.3471	NaN	25.8257	25.4817	25.8786	NaN			13	12	12	37.8	36.2	36.2	61.64	0	162.82	2115700000	58	26.239	26.3547	26.4772	25.7286	12	5	4	3	0.343234	-0.12251	-1.01649	Q96I24	Q96I24	Far upstream element-binding protein 3	FUBP3	3292	sp|Q96I24|FUBP3_HUMAN Far upstream element-binding protein 3 OS=Homo sapiens OX=9606 GN=FUBP3 PE=1 SV=2
26.6048	26.8749	26.7898	25.7765	26.8817	NaN	26.7064	26.8078	26.7922	26.5107	NaN	27.0155	26.5404	25.6923	NaN			9	9	9	59.2	59.2	59.2	19.757	0	122.96	1924600000	46	26.5828	26.5856	26.7043	26.4161	12	5	4	3	0.641041	-0.118723	-0.487143	A0A087X271;H3BVI6;B4DDF4;B4DUT8;Q99439;K7ES69;A0A087X1X5;A0A087WV51;H3BQH0	A0A087X271;H3BVI6;B4DDF4;B4DUT8;Q99439;K7ES69	Calponin;Calponin-2	CNN2	105	tr|A0A087X271|A0A087X271_HUMAN Calponin (Fragment) OS=Homo sapiens OX=9606 GN=CNN2 PE=1 SV=1;tr|H3BVI6|H3BVI6_HUMAN Calponin OS=Homo sapiens OX=9606 GN=CNN2 PE=1 SV=2;tr|B4DDF4|B4DDF4_HUMAN Calponin OS=Homo sapiens OX=9606 GN=CNN2 PE=1 SV=1;tr|B4DUT8|B4DUT
25.6088	26.0157	25.7395	26.3568	26.2002	25.7643	26.1537	NaN	26.4154	26.0726	26.5114	26.2281	25.8884	26.4275	NaN			8	6	6	25.4	21.7	21.7	59.689	0	64.383	846590000	31	26.1063	25.9842	26.1015	26.2638	13	5	4	4	0.570154	-0.117288	-0.595656	O95758;X6R242	O95758	Polypyrimidine tract-binding protein 3	PTBP3	1589	sp|O95758|PTBP3_HUMAN Polypyrimidine tract-binding protein 3 OS=Homo sapiens OX=9606 GN=PTBP3 PE=1 SV=2
27.5005	27.741	27.2321	25.1696	27.6621	26.6576	27.4685	27.2974	NaN	27.275	26.8858	26.2319	26.1024	26.4628	NaN			3	3	3	35	35	35	15.807	0	17.615	1220900000	39	26.899	27.0611	27.1746	26.4207	13	5	4	4	0.847013	-0.11353	-0.200204	P62266;D6RD47	P62266;D6RD47	40S ribosomal protein S23	RPS23	2384	sp|P62266|RS23_HUMAN 40S ribosomal protein S23 OS=Homo sapiens OX=9606 GN=RPS23 PE=1 SV=3;tr|D6RD47|D6RD47_HUMAN 40S ribosomal protein S23 OS=Homo sapiens OX=9606 GN=RPS23 PE=1 SV=1
25.5122	25.1904	25.4763	25.5085	25.4447	NaN	25.3968	25.5505	25.5135	25.6696	NaN	NaN	NaN	NaN	NaN			8	8	8	24	24	24	51.908	0	68.353	801440000	37	25.4736	25.4264	25.5326	NaN	9	5	4	0	0.248378	-0.106145	-1.25903	O95219;F8W9T3;F8WDD4	O95219	Sorting nexin-4	SNX4	1560	sp|O95219|SNX4_HUMAN Sorting nexin-4 OS=Homo sapiens OX=9606 GN=SNX4 PE=1 SV=1
26.0815	25.2211	25.3251	25.0413	25.2162	NaN	26.2969	25.702	24.7934	25.1351	NaN	NaN	NaN	NaN	NaN			9	9	9	22.8	22.8	22.8	68.329	0	55.341	1581300000	48	25.4236	25.3771	25.4819	NaN	9	5	4	0	0.776862	-0.104799	-0.294575	Q15637;C9J792;F8WEV5	Q15637	Splicing factor 1	SF1	2733	sp|Q15637|SF01_HUMAN Splicing factor 1 OS=Homo sapiens OX=9606 GN=SF1 PE=1 SV=4
25.9195	25.8473	26.3343	25.7083	26.3606	26.216	26.415	25.9671	NaN	25.9445	NaN	NaN	26.3852	26.0891	NaN			7	7	7	34	34	34	35.23	0	88.401	666800000	28	26.1079	26.034	26.1356	26.2371	11	5	4	2	0.588608	-0.101643	-0.566718	Q9Y315;E9PPM8;G3V158;E9PML7;E9PMH9;E9PPK3;E9PJ44;E9PJB9	Q9Y315;E9PPM8;G3V158;E9PML7	Deoxyribose-phosphate aldolase	DERA	3878	sp|Q9Y315|DEOC_HUMAN Deoxyribose-phosphate aldolase OS=Homo sapiens OX=9606 GN=DERA PE=1 SV=2;tr|E9PPM8|E9PPM8_HUMAN 2-deoxy-D-ribose 5-phosphate aldolase OS=Homo sapiens OX=9606 GN=DERA PE=1 SV=1;tr|G3V158|G3V158_HUMAN 2-deoxy-D-ribose 5-phosphate aldolas
26.3405	26.1293	25.9058	26.7392	26.0824	NaN	26.2571	26.5305	26.4035	26.1728	NaN	NaN	NaN	NaN	NaN			10	10	10	28.5	28.5	28.5	55.455	0	25.567	865120000	30	26.2846	26.2394	26.341	NaN	9	5	4	0	0.582486	-0.101569	-0.576259	Q8WWY3;E7EVX8;E7EU94;E7ESX0;E7EN72	Q8WWY3;E7EVX8	U4/U6 small nuclear ribonucleoprotein Prp31	PRPF31	3161	sp|Q8WWY3|PRP31_HUMAN U4/U6 small nuclear ribonucleoprotein Prp31 OS=Homo sapiens OX=9606 GN=PRPF31 PE=1 SV=2;tr|E7EVX8|E7EVX8_HUMAN Pre-mRNA-processing factor 31 OS=Homo sapiens OX=9606 GN=PRPF31 PE=1 SV=1
25.643	25.069	25.4815	26.0958	25.9322	NaN	25.6509	26.0876	25.3324	25.8515	NaN	NaN	NaN	NaN	NaN			12	12	12	15.1	15.1	15.1	127.83	0	41.767	669930000	23	25.6826	25.6443	25.7306	NaN	9	5	4	0	0.737348	-0.0862996	-0.349005	A0A0X1KG75;A0A590PXD8;A0A0D9SG04;Q53SF7;A0A0B4J1Z0;H7C1G2;C9JWZ0;C9JAU3;C9J5Y6;C9JK90;C9J8C4;F8WEK0	A0A0X1KG75;A0A590PXD8;A0A0D9SG04;Q53SF7;A0A0B4J1Z0	Cordon-bleu protein-like 1	COBLL1	219	tr|A0A0X1KG75|A0A0X1KG75_HUMAN Cordon-bleu protein-like 1 (Fragment) OS=Homo sapiens OX=9606 GN=COBLL1 PE=1 SV=1;tr|A0A590PXD8|A0A590PXD8_HUMAN Cordon-bleu protein-like 1 OS=Homo sapiens OX=9606 GN=COBLL1 PE=1 SV=1;tr|A0A0D9SG04|A0A0D9SG04_HUMAN Cordon-ble
25.4332	25.4543	25.6992	25.2246	25.6199	NaN	25.3217	25.4359	25.8619	25.6676	NaN	NaN	NaN	NaN	NaN			5	5	5	9.3	9.3	9.3	72.995	0	26.112	483180000	20	25.5242	25.4862	25.5718	NaN	9	5	4	0	0.563578	-0.0855428	-0.6061	Q8TE77;E9PIT5;A0A087WWG1;C9JUG3	Q8TE77;E9PIT5;A0A087WWG1	Protein phosphatase Slingshot homolog 3	SSH3	3132	sp|Q8TE77|SSH3_HUMAN Protein phosphatase Slingshot homolog 3 OS=Homo sapiens OX=9606 GN=SSH3 PE=1 SV=2;tr|E9PIT5|E9PIT5_HUMAN Protein phosphatase Slingshot homolog 3 (Fragment) OS=Homo sapiens OX=9606 GN=SSH3 PE=1 SV=2;tr|A0A087WWG1|A0A087WWG1_HUMAN Protei
26.5527	26.2749	25.9627	25.9732	26.1723	25.7136	NaN	26.191	26.7779	26.368	NaN	NaN	NaN	26.3768	NaN			3	3	3	30.7	30.7	30.7	17.781	0	15.186	699160000	16	26.2363	26.1871	26.2626	26.3768	10	5	4	1	0.752028	-0.0755006	-0.328658	Q16540;H7C2P7;A6NJD9;A8MVT4;A8MYK1	Q16540;H7C2P7;A6NJD9;A8MVT4;A8MYK1	39S ribosomal protein L23, mitochondrial	MRPL23	2759	sp|Q16540|RM23_HUMAN 39S ribosomal protein L23, mitochondrial OS=Homo sapiens OX=9606 GN=MRPL23 PE=1 SV=1;tr|H7C2P7|H7C2P7_HUMAN 39S ribosomal protein L23, mitochondrial (Fragment) OS=Homo sapiens OX=9606 GN=MRPL23 PE=1 SV=1;tr|A6NJD9|A6NJD9_HUMAN 39S ribo
25.7828	24.9394	25.3284	24.8188	24.9735	25.8418	25.3727	NaN	24.5731	25.1748	25.4043	25.7187	26.1291	26.0196	NaN			5	5	5	11.7	11.7	11.7	71.158	0	29.847	475000000	26	25.3905	25.1686	25.2406	25.8179	13	5	4	4	0.819949	-0.0720175	-0.236322	Q8NCL4;S4R3S5	Q8NCL4	Polypeptide N-acetylgalactosaminyltransferase 6	GALNT6	3082	sp|Q8NCL4|GALT6_HUMAN Polypeptide N-acetylgalactosaminyltransferase 6 OS=Homo sapiens OX=9606 GN=GALNT6 PE=2 SV=2
25.2071	25.6548	25.4318	26.7409	25.7798	26.5439	25.707	NaN	25.788	25.3004	26.2019	26.6607	26.182	25.9863	NaN			3	3	3	17.1	17.1	17.1	27.907	0	13.325	705250000	34	25.9373	25.7629	25.8348	26.2577	13	5	4	4	0.853458	-0.0719728	-0.191648	E7EPT4;P19404	E7EPT4;P19404	NADH dehydrogenase [ubiquinone] flavoprotein 2, mitochondrial	NDUFV2	804	tr|E7EPT4|E7EPT4_HUMAN NADH dehydrogenase [ubiquinone] flavoprotein 2, mitochondrial OS=Homo sapiens OX=9606 GN=NDUFV2 PE=1 SV=1;sp|P19404|NDUV2_HUMAN NADH dehydrogenase [ubiquinone] flavoprotein 2, mitochondrial OS=Homo sapiens OX=9606 GN=NDUFV2 PE=1 SV=2
26.2664	26.8182	26.355	25.826	26.4173	NaN	26.3449	26.2567	26.7594	26.2425	NaN	25.6067	NaN	NaN	NaN			9	9	9	37.5	37.5	37.5	29.484	0	30.01	1040200000	41	26.2893	26.3366	26.4009	25.6067	10	5	4	1	0.767754	-0.0642867	-0.307029	Q4VXZ8;Q9NUI1;A0A0J9YWI0;A0A0J9YY83;G3V0I9;A0A0J9YXZ6;H7C078	Q4VXZ8;Q9NUI1;A0A0J9YWI0	Peroxisomal 2,4-dienoyl-CoA reductase	DECR2	2802	tr|Q4VXZ8|Q4VXZ8_HUMAN Peroxisomal 2,4-dienoyl-CoA reductase OS=Homo sapiens OX=9606 GN=DECR2 PE=1 SV=1;sp|Q9NUI1|DECR2_HUMAN Peroxisomal 2,4-dienoyl-CoA reductase OS=Homo sapiens OX=9606 GN=DECR2 PE=1 SV=1;tr|A0A0J9YWI0|A0A0J9YWI0_HUMAN Peroxisomal 2,4-di
26.2322	25.7477	26.543	25.8821	26.1486	26.1285	26.3796	26.1186	NaN	26.0722	26.3282	26.8424	26.4356	25.9094	NaN			7	7	7	29.8	29.8	29.8	43.363	0	20.606	908380000	31	26.2129	26.1107	26.1748	26.3789	13	5	4	4	0.716185	-0.0640337	-0.37863	P07902;G3V3U5;G3V223;F2Z2X9;G3V4G9;H0YJL3	P07902;G3V3U5;G3V223;F2Z2X9;G3V4G9	Galactose-1-phosphate uridylyltransferase	GALT	1702	sp|P07902|GALT_HUMAN Galactose-1-phosphate uridylyltransferase OS=Homo sapiens OX=9606 GN=GALT PE=1 SV=3;tr|G3V3U5|G3V3U5_HUMAN Galactose-1-phosphate uridylyltransferase OS=Homo sapiens OX=9606 GN=GALT PE=3 SV=1;tr|G3V223|G3V223_HUMAN Galactose-1-phosphate
25.2364	25.5633	24.7029	25.4154	25.2873	NaN	25.5839	25.3353	25.1244	25.1611	NaN	NaN	NaN	NaN	NaN			7	7	2	16.2	16.2	3.8	76.852	0	36.586	544960000	18	25.2678	25.2411	25.3012	NaN	9	5	4	0	0.760062	-0.0601469	-0.317588	A0A2U3TZY2;Q9H078;H0YGM0;A0A2R8Y7E8;F5H392;A0A2R8Y6R5	A0A2U3TZY2;Q9H078;H0YGM0	Caseinolytic peptidase B protein homolog	CLPB	341	tr|A0A2U3TZY2|A0A2U3TZY2_HUMAN Caseinolytic peptidase B protein homolog OS=Homo sapiens OX=9606 GN=CLPB PE=1 SV=1;sp|Q9H078|CLPB_HUMAN Caseinolytic peptidase B protein homolog OS=Homo sapiens OX=9606 GN=CLPB PE=1 SV=1;tr|H0YGM0|H0YGM0_HUMAN Caseinolytic pe
26.8143	27.2532	27.489	27.6553	25.9282	NaN	27.022	27.2211	27.2648	26.8094	NaN	NaN	NaN	NaN	NaN			8	8	8	25.1	25.1	25.1	55.882	0	51.927	1245700000	33	27.0508	27.028	27.0793	NaN	9	5	4	0	0.891325	-0.0513389	-0.141678	Q9UI12;G3V126;E5RK31;E5RJG1;H0YB41;E5RG49;E5RHH0	Q9UI12;G3V126	V-type proton ATPase subunit H	ATP6V1H	3771	sp|Q9UI12|VATH_HUMAN V-type proton ATPase subunit H OS=Homo sapiens OX=9606 GN=ATP6V1H PE=1 SV=1;tr|G3V126|G3V126_HUMAN V-type proton ATPase subunit H OS=Homo sapiens OX=9606 GN=ATP6V1H PE=1 SV=1
25.6117	26.2763	26.3563	26.2503	26.0715	NaN	25.9625	26.2277	26.3905	26.0444	NaN	NaN	NaN	NaN	NaN			13	13	1	22.1	22.1	2.1	102.83	0	125.86	1180900000	45	26.1323	26.1132	26.1563	NaN	9	5	4	0	0.811042	-0.0430534	-0.248282	E7ESP4;E7EMF1;E9PB77;D6RG08	E7ESP4;E7EMF1;E9PB77		ITGA2	815	tr|E7ESP4|E7ESP4_HUMAN Integrin alpha-2 OS=Homo sapiens OX=9606 GN=ITGA2 PE=1 SV=1;tr|E7EMF1|E7EMF1_HUMAN Integrin alpha-2 OS=Homo sapiens OX=9606 GN=ITGA2 PE=1 SV=1;tr|E9PB77|E9PB77_HUMAN Integrin alpha-2 OS=Homo sapiens OX=9606 GN=ITGA2 PE=1 SV=1
25.1624	25.4328	25.1602	24.3772	24.9197	NaN	25.4887	24.527	24.8991	25.2979	NaN	NaN	23.8337	23.5663	NaN			5	5	5	8.7	8.7	8.7	102.13	0	17.464	502710000	28	24.7877	25.0105	25.0532	23.7	11	5	4	2	0.881318	-0.0427055	-0.154839	Q9UDR5;F8WAH1;F8WE53	Q9UDR5;F8WAH1	Alpha-aminoadipic semialdehyde synthase, mitochondrial;Lysine ketoglutarate reductase;Saccharopine dehydrogenase	AASS	3744	sp|Q9UDR5|AASS_HUMAN Alpha-aminoadipic semialdehyde synthase, mitochondrial OS=Homo sapiens OX=9606 GN=AASS PE=1 SV=1;tr|F8WAH1|F8WAH1_HUMAN Lysine ketoglutarate reductase OS=Homo sapiens OX=9606 GN=AASS PE=1 SV=1
26.0439	25.5662	25.7715	25.5426	26.0543	25.432	25.9278	25.9349	NaN	26.0572	25.6281	26.4372	26.5614	25.7814	NaN			6	6	5	26.7	26.7	22.3	37.499	0	60.498	1179200000	58	25.903	25.7957	25.838	26.102	13	5	4	4	0.815862	-0.0423035	-0.241805	Q5VT66;H7BYZ9;A0A494C1P3;H0YDX4;X6RIL1;F6V6Z1	Q5VT66;H7BYZ9;A0A494C1P3	Mitochondrial amidoxime-reducing component 1	MARC1	2872	sp|Q5VT66|MARC1_HUMAN Mitochondrial amidoxime-reducing component 1 OS=Homo sapiens OX=9606 GN=MTARC1 PE=1 SV=1;tr|H7BYZ9|H7BYZ9_HUMAN Mitochondrial amidoxime-reducing component 1 (Fragment) OS=Homo sapiens OX=9606 GN=MTARC1 PE=1 SV=1;tr|A0A494C1P3|A0A494C1
26.3019	26.2947	26.1482	26.1658	26.0234	NaN	26.3371	26.3013	26.1314	26.1309	NaN	NaN	NaN	NaN	NaN			18	18	18	35.4	35.4	35.4	92.75	0	152.29	1857200000	58	26.2039	26.1868	26.2252	NaN	9	5	4	0	0.628595	-0.038371	-0.505705	A0A2R8Y4W2;A0A2R8YE63;Q12929;F5H0R8;H0YFG1;F5GYM8;F5H3Q6;F5H1B5;F5H2B8	A0A2R8Y4W2;A0A2R8YE63;Q12929	Epidermal growth factor receptor kinase substrate 8	EPS8	310	tr|A0A2R8Y4W2|A0A2R8Y4W2_HUMAN Epidermal growth factor receptor kinase substrate 8 OS=Homo sapiens OX=9606 GN=EPS8 PE=1 SV=1;tr|A0A2R8YE63|A0A2R8YE63_HUMAN Epidermal growth factor receptor kinase substrate 8 OS=Homo sapiens OX=9606 GN=EPS8 PE=1 SV=1;sp|Q12
26.304	26.1812	26.3485	26.6994	26.6561	NaN	26.4019	26.4642	26.3891	26.5912	25.7323	24.8928	25.1231	NaN	NaN			3	3	3	11.8	11.8	11.8	44.387	0	13.426	896170000	25	26.1486	26.4378	26.4616	25.2494	12	5	4	3	0.851493	-0.0237962	-0.194256	Q9Y639;H3BU51;Q9UFM8	Q9Y639;H3BU51;Q9UFM8	Neuroplastin	NPTN;DKFZp566H1924	3937	sp|Q9Y639|NPTN_HUMAN Neuroplastin OS=Homo sapiens OX=9606 GN=NPTN PE=1 SV=2;tr|H3BU51|H3BU51_HUMAN Neuroplastin OS=Homo sapiens OX=9606 GN=NPTN PE=1 SV=1;tr|Q9UFM8|Q9UFM8_HUMAN Neuroplastin (Fragment) OS=Homo sapiens OX=9606 GN=NPTN PE=1 SV=2
26.1866	26.1987	26.2041	26.3422	26.367	NaN	25.9596	26.3163	26.5492	26.2894	NaN	NaN	25.7356	NaN	NaN			7	7	7	32.1	32.1	32.1	31.698	0	34.751	835270000	30	26.2149	26.2597	26.2786	25.7356	10	5	4	1	0.874576	-0.0188874	-0.163723	Q96GD0	Q96GD0	Pyridoxal phosphate phosphatase	PDXP	3276	sp|Q96GD0|PLPP_HUMAN Pyridoxal phosphate phosphatase OS=Homo sapiens OX=9606 GN=PDXP PE=1 SV=2
24.9557	25.0406	25.1481	25.3633	25.0299	NaN	25.3049	25.2405	24.9867	24.9655	24.7997	NaN	NaN	NaN	NaN			6	6	6	21.4	21.4	21.4	43.369	0	20.674	409160000	29	25.0835	25.1075	25.1244	24.7997	10	5	4	1	0.883199	-0.0168765	-0.152364	Q99571;F6SFZ6;H0YF70;F5H1M6;F5GZQ9	Q99571;F6SFZ6	P2X purinoceptor 4;P2X purinoceptor	P2RX4	3357	sp|Q99571|P2RX4_HUMAN P2X purinoceptor 4 OS=Homo sapiens OX=9606 GN=P2RX4 PE=1 SV=2;tr|F6SFZ6|F6SFZ6_HUMAN ATP receptor OS=Homo sapiens OX=9606 GN=P2RX4 PE=1 SV=1
26.7743	25.9895	25.8523	25.2912	25.1788	NaN	26.5586	26.3484	24.8612	25.5478	NaN	NaN	NaN	NaN	NaN			5	5	5	20.4	20.4	20.4	42.075	0	145.98	803780000	23	25.8224	25.8172	25.829	NaN	9	5	4	0	0.980683	-0.0118146	-0.0250909	O75781;A0A087WTK8;A0A087WWY4	O75781	Paralemmin-1	PALM	1510	sp|O75781|PALM_HUMAN Paralemmin-1 OS=Homo sapiens OX=9606 GN=PALM PE=1 SV=2
26.2983	26.31	25.9128	26.5011	25.3781	24.6378	26.5262	26.9716	NaN	26.2113	NaN	NaN	NaN	NaN	NaN			15	15	15	29.9	29.9	29.9	86.706	0	155.77	1541200000	53	26.083	26.08	26.0867	NaN	9	5	4	0	0.989733	-0.00666771	-0.0133341	Q6P996;H3BND4;Q86XE2;J3KNK7;Q6P474;Q6XYB5;H3BNL6;H3BPV5;H3BM88;A0A0J9YXH6	Q6P996;H3BND4	Pyridoxal-dependent decarboxylase domain-containing protein 1	PDXDC1	2911	sp|Q6P996|PDXD1_HUMAN Pyridoxal-dependent decarboxylase domain-containing protein 1 OS=Homo sapiens OX=9606 GN=PDXDC1 PE=1 SV=2;tr|H3BND4|H3BND4_HUMAN Pyridoxal-dependent decarboxylase domain-containing protein 1 OS=Homo sapiens OX=9606 GN=PDXDC1 PE=1 SV=1
25.9854	26.53	25.9706	26.524	25.7984	NaN	26.654	26.5829	26.8879	24.5342	25.7983	25.0812	26.1879	25.5522	NaN			4	4	4	22.1	22.1	22.1	31.642	0	47.931	861290000	21	26.0067	26.1617	26.1648	25.6549	13	5	4	4	0.995364	-0.00307703	-0.00602129	Q86Y82;B1AJQ6	Q86Y82;B1AJQ6	Syntaxin-12	STX12	3000	sp|Q86Y82|STX12_HUMAN Syntaxin-12 OS=Homo sapiens OX=9606 GN=STX12 PE=1 SV=1;tr|B1AJQ6|B1AJQ6_HUMAN Syntaxin-12 (Fragment) OS=Homo sapiens OX=9606 GN=STX12 PE=1 SV=2
26.4322	26.3985	26.1105	25.9006	26.3193	NaN	26.2999	26.2117	26.23	26.1835	NaN	NaN	NaN	NaN	NaN			3	3	3	20.7	20.7	20.7	30.276	0	59.918	703890000	26	26.2318	26.2322	26.2313	NaN	9	5	4	0	0.993633	0.000954723	0.00826853	Q9UBW8;F5H4Z0;F5H3M6;G3XAP1;F5GXT7;F5H4U8;F5H7C6;F5GYF7;F5H248	Q9UBW8	COP9 signalosome complex subunit 7a	COPS7A	3743	sp|Q9UBW8|CSN7A_HUMAN COP9 signalosome complex subunit 7a OS=Homo sapiens OX=9606 GN=COPS7A PE=1 SV=1
28.5223	27.8397	27.9609	27.3858	27.4048	NaN	28.5813	28.0714	27.1474	27.4698	27.7636	27.8596	28.1241	28.2413	NaN			4	4	4	42.9	42.9	42.9	15.892	0	54.761	3002500000	52	27.8748	27.8227	27.8175	27.9972	13	5	4	4	0.989096	0.00519352	0.0141617	Q9Y2V2;H3BTK3;I3L3X8;H3BSW7;H3BUY4;H3BPY5;H3BNU9	Q9Y2V2;H3BTK3;I3L3X8;H3BSW7;H3BUY4;H3BPY5;H3BNU9	Calcium-regulated heat stable protein 1	CARHSP1	3870	sp|Q9Y2V2|CHSP1_HUMAN Calcium-regulated heat-stable protein 1 OS=Homo sapiens OX=9606 GN=CARHSP1 PE=1 SV=2;tr|H3BTK3|H3BTK3_HUMAN Calcium-regulated heat-stable protein 1 (Fragment) OS=Homo sapiens OX=9606 GN=CARHSP1 PE=1 SV=1;tr|I3L3X8|I3L3X8_HUMAN Calcium
25.1532	24.9844	24.783	24.8294	24.8921	NaN	25.1868	25.0678	24.6321	24.7485	NaN	NaN	NaN	NaN	NaN			4	4	4	28.4	28.4	28.4	26.131	0	38.035	383640000	20	24.9197	24.9284	24.9088	NaN	9	5	4	0	0.889889	0.0196288	0.143566	O75934	O75934	Pre-mRNA-splicing factor SPF27	BCAS2	1522	sp|O75934|SPF27_HUMAN Pre-mRNA-splicing factor SPF27 OS=Homo sapiens OX=9606 GN=BCAS2 PE=1 SV=1
25.7396	26.2019	26.4897	26.0677	26.0358	26.6528	25.819	25.9219	25.9237	NaN	26.9616	26.6757	27.2552	26.8446	NaN			5	5	5	12.8	12.8	12.8	57.174	0	76.749	1041100000	41	26.353	26.107	26.0794	26.9343	13	5	4	4	0.902999	0.0276109	0.126362	A0A2R8YDT1;P15104	A0A2R8YDT1;P15104	Glutamine synthetase	GLUL	330	tr|A0A2R8YDT1|A0A2R8YDT1_HUMAN Glutamine synthetase OS=Homo sapiens OX=9606 GN=GLUL PE=1 SV=1;sp|P15104|GLNA_HUMAN Glutamine synthetase OS=Homo sapiens OX=9606 GN=GLUL PE=1 SV=4
25.2747	25.1344	25.8965	25.3859	25.6843	NaN	25.1776	25.5991	25.4089	25.5857	NaN	25.8727	24.3613	25.6264	NaN			7	7	7	27.4	27.4	27.4	41.329	0	17.391	596940000	24	25.4173	25.4751	25.4428	25.2868	12	5	4	3	0.862236	0.0323331	0.180022	G5EA06;Q92552;D6RH20;D6RJC7;E5RJ73	G5EA06;Q92552;D6RH20	28S ribosomal protein S27, mitochondrial	MRPS27	1042	tr|G5EA06|G5EA06_HUMAN 28S ribosomal protein S27, mitochondrial OS=Homo sapiens OX=9606 GN=MRPS27 PE=1 SV=1;sp|Q92552|RT27_HUMAN 28S ribosomal protein S27, mitochondrial OS=Homo sapiens OX=9606 GN=MRPS27 PE=1 SV=3;tr|D6RH20|D6RH20_HUMAN 28S ribosomal prote
25.5304	25.747	25.6115	25.5184	25.5167	NaN	25.4576	25.4572	25.728	25.5422	NaN	NaN	NaN	NaN	NaN			11	11	1	15.1	15.1	1.3	126.95	0	38.436	772200000	34	25.5677	25.5848	25.5462	NaN	9	5	4	0	0.62387	0.0385441	0.512803	A0A3B3IRI3;A0A3B3IRV6;U3KQJ2;A0A3B3IU26;B1AN86	A0A3B3IRI3;A0A3B3IRV6			347	tr|A0A3B3IRI3|A0A3B3IRI3_HUMAN Tight junction protein ZO-2 OS=Homo sapiens OX=9606 GN=TJP2 PE=1 SV=1;tr|A0A3B3IRV6|A0A3B3IRV6_HUMAN Tight junction protein ZO-2 (Fragment) OS=Homo sapiens OX=9606 GN=TJP2 PE=1 SV=1
26.3354	26.5832	26.4482	27.2837	25.9997	NaN	26.4181	26.736	26.6651	26.1377	NaN	NaN	NaN	NaN	NaN			7	7	7	27.3	27.3	27.3	45.673	0	28.136	792630000	22	26.5119	26.53	26.4892	NaN	9	5	4	0	0.883195	0.0408335	0.152369	P16444;H3BQS5;H3BP43	P16444	Dipeptidase 1	DPEP1	1848	sp|P16444|DPEP1_HUMAN Dipeptidase 1 OS=Homo sapiens OX=9606 GN=DPEP1 PE=1 SV=3
25.1113	25.1623	25.4857	24.8481	25.2279	24.8763	25.2364	25.3051	NaN	25.0809	NaN	25.0428	24.5794	24.9091	NaN			6	6	6	24.3	24.3	24.3	37.578	0	30.178	520870000	25	25.0721	25.1671	25.1247	24.8438	12	5	4	3	0.775811	0.0423713	0.29601	Q92905;E5RHH5;E5RHF2	Q92905;E5RHH5;E5RHF2	COP9 signalosome complex subunit 5	COPS5	3202	sp|Q92905|CSN5_HUMAN COP9 signalosome complex subunit 5 OS=Homo sapiens OX=9606 GN=COPS5 PE=1 SV=4;tr|E5RHH5|E5RHH5_HUMAN COP9 signalosome complex subunit 5 OS=Homo sapiens OX=9606 GN=COPS5 PE=1 SV=1;tr|E5RHF2|E5RHF2_HUMAN COP9 signalosome complex subunit
27.5779	27.3824	27.2361	27.4928	27.6769	NaN	27.614	27.2856	27.541	27.2148	26.3141	27.5388	26.8765	27.3635	NaN			6	6	6	38.8	38.8	38.8	14.369	0	15.603	1698600000	51	27.3165	27.4732	27.4138	27.0233	13	5	4	4	0.639996	0.0593731	0.488694	C9JXB8;C9JNW5;P83731	C9JXB8;C9JNW5;P83731	60S ribosomal protein L24	RPL24	627	tr|C9JXB8|C9JXB8_HUMAN 60S ribosomal protein L24 OS=Homo sapiens OX=9606 GN=RPL24 PE=1 SV=1;tr|C9JNW5|C9JNW5_HUMAN 60S ribosomal protein L24 OS=Homo sapiens OX=9606 GN=RPL24 PE=1 SV=1;sp|P83731|RL24_HUMAN 60S ribosomal protein L24 OS=Homo sapiens OX=9606 G
24.9926	24.7428	24.8028	24.6419	24.4526	NaN	24.9458	24.6367	24.6706	24.3757	NaN	NaN	NaN	NaN	NaN			3	3	3	10.1	10.1	10.1	54.826	0	18.947	334060000	16	24.6957	24.7265	24.6572	NaN	9	5	4	0	0.644615	0.0693468	0.481846	O00401	O00401	Neural Wiskott-Aldrich syndrome protein	WASL	1305	sp|O00401|WASL_HUMAN Neural Wiskott-Aldrich syndrome protein OS=Homo sapiens OX=9606 GN=WASL PE=1 SV=2
27.1515	26.7385	26.6455	25.9559	26.6353	NaN	27.0805	26.9235	25.8767	26.3159	NaN	NaN	NaN	NaN	NaN			7	7	7	7.8	7.8	7.8	106.12	0	42.21	1338500000	48	26.5915	26.6254	26.5492	NaN	9	5	4	0	0.822628	0.076195	0.232732	Q9NYF8;A0A1W2PQ43;E9PK09;E9PQN2;E9PKI6;E9PK91;E9PJA7;H0YF14	Q9NYF8;A0A1W2PQ43;E9PK09;E9PQN2;E9PKI6;E9PK91;E9PJA7	Bcl-2-associated transcription factor 1	BCLAF1	3698	sp|Q9NYF8|BCLF1_HUMAN Bcl-2-associated transcription factor 1 OS=Homo sapiens OX=9606 GN=BCLAF1 PE=1 SV=2;tr|A0A1W2PQ43|A0A1W2PQ43_HUMAN Bcl-2-associated transcription factor 1 OS=Homo sapiens OX=9606 GN=BCLAF1 PE=1 SV=1;tr|E9PK09|E9PK09_HUMAN Bcl-2-associ
25.2851	25.3915	25.0228	25.9938	25.4159	NaN	25.5403	25.4231	25.2039	25.2152	NaN	25.1554	24.85	NaN	NaN			11	10	10	20.5	18	18	79.187	0	29.025	519930000	37	25.3179	25.4218	25.3456	25.0027	11	5	4	2	0.706536	0.0762022	0.39226	O60488;H0Y9A0;D6RF95;D6RDA8	O60488	Long-chain-fatty-acid--CoA ligase 4	ACSL4	1444	sp|O60488|ACSL4_HUMAN Long-chain-fatty-acid--CoA ligase 4 OS=Homo sapiens OX=9606 GN=ACSL4 PE=1 SV=2
25.4253	24.9369	25.1017	25.4374	25.4317	25.0041	25.2597	25.1655	NaN	25.3165	NaN	NaN	25.3352	NaN	NaN			7	7	7	18.5	18.5	18.5	67.314	0	27.159	605710000	20	25.2414	25.2666	25.1865	25.3352	10	5	4	1	0.564579	0.0801582	0.604506	P61221;D6R9I9;D6RGF4;H0Y990	P61221;D6R9I9	ATP-binding cassette sub-family E member 1	ABCE1	2356	sp|P61221|ABCE1_HUMAN ATP-binding cassette sub-family E member 1 OS=Homo sapiens OX=9606 GN=ABCE1 PE=1 SV=1;tr|D6R9I9|D6R9I9_HUMAN ATP-binding cassette sub-family E member 1 OS=Homo sapiens OX=9606 GN=ABCE1 PE=1 SV=1
26.2343	26.0324	25.8646	26.3889	26.2535	NaN	26.1783	25.8388	26.0817	26.1255	25.9378	25.6795	25.6852	25.9887	NaN			7	7	7	8.2	8.2	8.2	121.32	0	107.98	1050100000	36	26.0222	26.1547	26.0561	25.8228	13	5	4	4	0.451088	0.0986522	0.798001	O00203;H0YBD0	O00203	AP-3 complex subunit beta-1	AP3B1	1293	sp|O00203|AP3B1_HUMAN AP-3 complex subunit beta-1 OS=Homo sapiens OX=9606 GN=AP3B1 PE=1 SV=3
24.9011	25.3171	24.9577	25.3234	25.4133	NaN	24.7695	25.4508	25.5981	24.5144	NaN	NaN	24.9875	24.5966	NaN			5	5	5	6.5	6.5	6.5	84.918	0	18.943	358250000	30	25.0754	25.1825	25.0832	24.7921	11	5	4	2	0.712683	0.0993303	0.383567	Q9Y3T9	Q9Y3T9	Nucleolar complex protein 2 homolog	NOC2L	3898	sp|Q9Y3T9|NOC2L_HUMAN Nucleolar complex protein 2 homolog OS=Homo sapiens OX=9606 GN=NOC2L PE=1 SV=4
28.7498	28.7675	28.4022	28.1273	28.5722	NaN	28.8911	28.6364	27.8981	28.2466	NaN	NaN	NaN	NaN	NaN			3	3	3	41.1	41.1	41.1	11.676	0	94.397	3588000000	80	28.4768	28.5238	28.4181	NaN	9	5	4	0	0.665773	0.105749	0.450789	P17096	P17096	High mobility group protein HMG-I/HMG-Y	HMGA1	1855	sp|P17096|HMGA1_HUMAN High mobility group protein HMG-I/HMG-Y OS=Homo sapiens OX=9606 GN=HMGA1 PE=1 SV=3
26.5914	26.5183	26.7096	26.2078	26.2445	NaN	26.5103	26.3269	26.1825	26.3691	NaN	NaN	NaN	NaN	NaN			6	6	6	23.8	23.8	23.8	41.581	0	15.232	705330000	20	26.4067	26.4543	26.3472	NaN	9	5	4	0	0.423724	0.107134	0.849457	B3KS98;O15372;A0A087WZK9;E5RJT0;E5RFW7;E5RFH0;E5RGU4	B3KS98;O15372;A0A087WZK9;E5RJT0	Eukaryotic translation initiation factor 3 subunit H	EIF3H	501	tr|B3KS98|B3KS98_HUMAN Eukaryotic translation initiation factor 3 subunit H OS=Homo sapiens OX=9606 GN=EIF3H PE=1 SV=1;sp|O15372|EIF3H_HUMAN Eukaryotic translation initiation factor 3 subunit H OS=Homo sapiens OX=9606 GN=EIF3H PE=1 SV=1;tr|A0A087WZK9|A0A08
26.926	26.9449	26.8977	26.3668	26.5832	NaN	27.1047	26.8787	26.388	26.1683	NaN	NaN	NaN	NaN	NaN			3	3	3	37.4	37.4	37.4	22.168	0	44.645	725020000	16	26.6954	26.7437	26.6349	NaN	9	5	4	0	0.650701	0.108835	0.472862	P20290;H0Y9Y1;D6RDG3	P20290	Transcription factor BTF3	BTF3	1892	sp|P20290|BTF3_HUMAN Transcription factor BTF3 OS=Homo sapiens OX=9606 GN=BTF3 PE=1 SV=1
25.999	25.8702	25.9739	25.7041	25.5649	NaN	25.7805	25.7233	25.5697	25.7356	NaN	NaN	NaN	NaN	NaN			8	8	8	23.6	23.6	23.6	66.86	0	30.192	613000000	25	25.769	25.8224	25.7023	NaN	9	5	4	0	0.277466	0.120151	1.17752	Q8TE67;A0A087X104	Q8TE67	Epidermal growth factor receptor kinase substrate 8-like protein 3	EPS8L3	3130	sp|Q8TE67|ES8L3_HUMAN Epidermal growth factor receptor kinase substrate 8-like protein 3 OS=Homo sapiens OX=9606 GN=EPS8L3 PE=1 SV=2
27.2588	28.2224	27.7407	28.7455	27.5941	NaN	28.2882	27.8035	27.5461	27.5081	NaN	25.3782	25.816	NaN	NaN			6	6	6	31.6	31.6	31.6	31.554	0	256.14	2414500000	45	27.4456	27.9123	27.7864	25.5971	11	5	4	2	0.71749	0.125852	0.376793	P29966	P29966	Myristoylated alanine-rich C-kinase substrate	MARCKS	1990	sp|P29966|MARCS_HUMAN Myristoylated alanine-rich C-kinase substrate OS=Homo sapiens OX=9606 GN=MARCKS PE=1 SV=4
25.9798	25.6756	25.8624	25.7344	26.2503	NaN	25.6213	26.3805	25.5888	25.4734	NaN	NaN	NaN	NaN	NaN			11	11	11	24.8	24.8	24.8	61.992	0	61.929	723950000	34	25.8407	25.9005	25.766	NaN	9	5	4	0	0.552704	0.134504	0.623529	Q9BVP2;C9JYH9;C9JZT7;B4DMU5	Q9BVP2	Guanine nucleotide-binding protein-like 3	GNL3	3435	sp|Q9BVP2|GNL3_HUMAN Guanine nucleotide-binding protein-like 3 OS=Homo sapiens OX=9606 GN=GNL3 PE=1 SV=2
27.8241	27.7885	26.9486	28.5772	27.4607	NaN	27.6465	27.456	27.9908	27.2299	NaN	NaN	NaN	26.0598	NaN			3	3	3	12.3	12.3	12.3	47.873	0	37.231	2082700000	41	27.4982	27.7198	27.5808	26.0598	10	5	4	1	0.688736	0.13902	0.417621	Q9UNS2;J3QL22;J3QS85;J3KTQ1;J3QKR0;C9JLV5;H7C3P9	Q9UNS2	COP9 signalosome complex subunit 3	COPS3	3831	sp|Q9UNS2|CSN3_HUMAN COP9 signalosome complex subunit 3 OS=Homo sapiens OX=9606 GN=COPS3 PE=1 SV=3
25.3805	25.7286	25.47	25.8662	26.1146	NaN	25.4549	25.6265	25.7247	25.4645	NaN	NaN	NaN	NaN	NaN			5	5	5	31.2	31.2	31.2	20.683	0	22.403	797170000	33	25.6478	25.712	25.5677	NaN	9	5	4	0	0.401367	0.144335	0.893292	Q9Y3B7;H0YCD5;E9PQB6	Q9Y3B7	39S ribosomal protein L11, mitochondrial	MRPL11	3886	sp|Q9Y3B7|RM11_HUMAN 39S ribosomal protein L11, mitochondrial OS=Homo sapiens OX=9606 GN=MRPL11 PE=1 SV=1
25.8422	25.7528	26.0082	25.2303	24.983	NaN	26.3672	25.9994	24.3147	24.9586	NaN	NaN	NaN	NaN	NaN			11	11	11	23.9	23.9	23.9	65.746	0	52.717	575850000	29	25.4951	25.5633	25.41	NaN	9	5	4	0	0.753412	0.153348	0.326748	Q93052;A0A087WZF1;C9JUT4;C9JXK9;C9JIY7;C9JT42;C9J3U9;C9J1K7;C9J5C8;C9J4E3;C9JE51;C9J2R5	Q93052;A0A087WZF1;C9JUT4;C9JXK9	Lipoma-preferred partner	LPP	3209	sp|Q93052|LPP_HUMAN Lipoma-preferred partner OS=Homo sapiens OX=9606 GN=LPP PE=1 SV=1;tr|A0A087WZF1|A0A087WZF1_HUMAN Lipoma-preferred partner OS=Homo sapiens OX=9606 GN=LPP PE=1 SV=1;tr|C9JUT4|C9JUT4_HUMAN LIM domain containing preferred translocation part
25.4895	25.3825	25.6983	25.9059	25.1043	NaN	25.6486	25.3523	25.4074	24.9476	NaN	NaN	NaN	NaN	NaN			10	10	10	34.6	34.6	34.6	41.738	0	33.495	714660000	25	25.4374	25.5161	25.339	NaN	9	5	4	0	0.407	0.17712	0.882084	P53367	P53367	Arfaptin-1	ARFIP1	2273	sp|P53367|ARFP1_HUMAN Arfaptin-1 OS=Homo sapiens OX=9606 GN=ARFIP1 PE=1 SV=2
25.4135	25.3935	25.5588	25.4111	25.4108	24.6096	25.5449	25.6084	NaN	25.2604	NaN	24.3435	23.4065	NaN	NaN			2	2	2	10.5	10.5	10.5	19.531	0	5.603	743290000	34	25.0874	25.4375	25.2558	23.875	11	5	4	2	0.401487	0.181715	0.893051	F8VUA2;F8VVT7;Q9HD42	F8VUA2;F8VVT7;Q9HD42	Charged multivesicular body protein 1a	CHMP1A	975	tr|F8VUA2|F8VUA2_HUMAN Charged multivesicular body protein 1a OS=Homo sapiens OX=9606 GN=CHMP1A PE=1 SV=1;tr|F8VVT7|F8VVT7_HUMAN Charged multivesicular body protein 1a OS=Homo sapiens OX=9606 GN=CHMP1A PE=1 SV=1;sp|Q9HD42|CHM1A_HUMAN Charged multivesicular
25.3114	25.348	25.2644	25.4302	25.346	NaN	25.4506	25.4148	24.9835	24.6896	NaN	NaN	NaN	NaN	NaN			10	10	10	11.8	11.8	11.8	142.51	0	36.17	808050000	34	25.2487	25.34	25.1346	NaN	9	5	4	0	0.248345	0.205416	1.25913	Q9BX66;A0A0U1RQI5;A0A3B3IT56;Q5T925;S4R303	Q9BX66;A0A0U1RQI5	Sorbin and SH3 domain-containing protein 1	SORBS1	3448	sp|Q9BX66|SRBS1_HUMAN Sorbin and SH3 domain-containing protein 1 OS=Homo sapiens OX=9606 GN=SORBS1 PE=1 SV=3;tr|A0A0U1RQI5|A0A0U1RQI5_HUMAN Sorbin and SH3 domain-containing protein 1 (Fragment) OS=Homo sapiens OX=9606 GN=SORBS1 PE=1 SV=1
27.1002	26.9755	27.0022	26.8565	27.1667	NaN	27.2085	27.1374	26.4198	26.4383	NaN	25.2571	NaN	NaN	NaN			7	7	7	36.2	36.2	36.2	28.994	0	76.188	1451000000	44	26.7562	27.0202	26.801	25.2571	10	5	4	1	0.306011	0.219221	1.1042	P50402;Q5HY57;F8WEQ1	P50402;Q5HY57	Emerin	EMD	2224	sp|P50402|EMD_HUMAN Emerin OS=Homo sapiens OX=9606 GN=EMD PE=1 SV=1;tr|Q5HY57|Q5HY57_HUMAN Emerin OS=Homo sapiens OX=9606 GN=EMD PE=1 SV=1
26.1483	25.3507	25.5151	25.3218	25.615	NaN	25.9216	25.8983	24.1158	25.5257	NaN	NaN	NaN	NaN	NaN			3	3	3	35.7	35.7	35.7	17.49	0	9.9069	624950000	43	25.4903	25.5902	25.3654	NaN	9	5	4	0	0.601387	0.224807	0.546978	P30049	P30049	ATP synthase subunit delta, mitochondrial	ATP5D	2001	sp|P30049|ATPD_HUMAN ATP synthase subunit delta, mitochondrial OS=Homo sapiens OX=9606 GN=ATP5F1D PE=1 SV=2
25.3506	25.8204	25.4326	25.8778	25.6041	NaN	25.2042	25.2639	25.803	25.2327	NaN	NaN	NaN	NaN	NaN			4	4	4	34.7	34.7	34.7	19.344	0	37.136	580910000	23	25.5099	25.6171	25.376	NaN	9	5	4	0	0.203351	0.241148	1.40311	E9PGT6;Q99627;H7C3S9;F8WEF2	E9PGT6;Q99627;H7C3S9	COP9 signalosome complex subunit 8	COPS8	860	tr|E9PGT6|E9PGT6_HUMAN COP9 signalosome complex subunit 8 OS=Homo sapiens OX=9606 GN=COPS8 PE=1 SV=1;sp|Q99627|CSN8_HUMAN COP9 signalosome complex subunit 8 OS=Homo sapiens OX=9606 GN=COPS8 PE=1 SV=1;tr|H7C3S9|H7C3S9_HUMAN COP9 signalosome complex subunit
25.65	26.1715	26.2858	25.2362	25.87	NaN	25.9436	25.7947	25.3848	25.2787	NaN	25.3963	NaN	25.0303	NaN			4	4	4	20.9	20.9	20.9	30.748	0	73.003	615890000	18	25.6402	25.8427	25.6005	25.2133	11	5	4	2	0.37476	0.242223	0.947873	Q9BT09;A0A0C4DFY8	Q9BT09	Protein canopy homolog 3	CNPY3	3408	sp|Q9BT09|CNPY3_HUMAN Protein canopy homolog 3 OS=Homo sapiens OX=9606 GN=CNPY3 PE=1 SV=1
25.2	25.4543	25.4663	25.5842	25.8938	NaN	25.7222	24.5365	25.4281	25.4147	NaN	NaN	NaN	NaN	NaN			5	5	5	22.6	22.6	22.6	32.736	0	12.023	476480000	25	25.4111	25.5197	25.2754	NaN	9	5	4	0	0.376523	0.244335	0.944168	Q9Y619;Q5VZD9;F2Z354	Q9Y619	Mitochondrial ornithine transporter 1	SLC25A15	3934	sp|Q9Y619|ORNT1_HUMAN Mitochondrial ornithine transporter 1 OS=Homo sapiens OX=9606 GN=SLC25A15 PE=1 SV=1
26.6592	26.6447	26.3608	26.4198	26.7407	NaN	26.3899	26.5176	26.1782	26.1951	NaN	26.5094	NaN	26.307	NaN			4	4	4	27.5	27.5	27.5	24.561	0	61.618	1055200000	32	26.4475	26.5651	26.3202	26.4082	11	5	4	2	0.0614559	0.244888	2.22463	H3BV80;H3BMM9;H3BTC0;Q15287;H3BMS0;H3BPG5	H3BV80;H3BMM9;H3BTC0;Q15287;H3BMS0;H3BPG5	RNA-binding protein with serine-rich domain 1	RNPS1	1100	tr|H3BV80|H3BV80_HUMAN RNA-binding protein with serine-rich domain 1 OS=Homo sapiens OX=9606 GN=RNPS1 PE=1 SV=2;tr|H3BMM9|H3BMM9_HUMAN RNA-binding protein with serine-rich domain 1 (Fragment) OS=Homo sapiens OX=9606 GN=RNPS1 PE=1 SV=1;tr|H3BTC0|H3BTC0_HUMA
27.4103	27.3354	26.9166	26.4174	26.8371	NaN	27.4802	27.4248	25.8659	26.1305	NaN	NaN	NaN	NaN	NaN			15	15	15	32.2	32.2	32.2	80.998	0	145.27	3470400000	96	26.8687	26.9834	26.7253	NaN	9	5	4	0	0.562522	0.258041	0.607783	A0A0C4DGB5;P20810;B7Z574;E7ES10;E7EVY3;E9PCH5;E9PDE4;H0Y7F0;H0Y9H6;E7EQA0;E7EQ12;H0YD33;A0A0A0MR45;F8W7E0;A0A0C4DGD1;E9PSG1;H0YA91;H0Y944;D6RC54;D6RGF7;E7EQK6;E7EN75;D6RBR1	A0A0C4DGB5;P20810;B7Z574;E7ES10;E7EVY3;E9PCH5;E9PDE4;H0Y7F0;H0Y9H6;E7EQA0;E7EQ12;H0YD33;A0A0A0MR45	Calpastatin	CAST	197	tr|A0A0C4DGB5|A0A0C4DGB5_HUMAN Calpain inhibitor OS=Homo sapiens OX=9606 GN=CAST PE=1 SV=1;sp|P20810|ICAL_HUMAN Calpastatin OS=Homo sapiens OX=9606 GN=CAST PE=1 SV=4;tr|B7Z574|B7Z574_HUMAN Calpain inhibitor OS=Homo sapiens OX=9606 GN=CAST PE=1 SV=1;tr|E7ES
25.5808	25.7607	25.572	25.4887	25.4711	NaN	25.6696	25.1037	25.4459	25.0453	24.8123	NaN	24.7592	24.7816	NaN			4	4	4	29.7	29.7	29.7	21.184	0	36.289	576910000	31	25.2909	25.5747	25.3161	24.7844	12	5	4	3	0.11114	0.258543	1.82263	Q07812;K4JQN1;H0YA56;I6LPK7	Q07812;K4JQN1	Apoptosis regulator BAX	BAX	2524	sp|Q07812|BAX_HUMAN Apoptosis regulator BAX OS=Homo sapiens OX=9606 GN=BAX PE=1 SV=1;tr|K4JQN1|K4JQN1_HUMAN Apoptosis regulator BAX OS=Homo sapiens OX=9606 GN=BAX PE=1 SV=1
27.8763	27.967	27.9148	27.9068	27.8432	NaN	28.0612	27.8059	27.4284	27.2602	NaN	NaN	NaN	NaN	NaN			9	9	9	34.1	34.1	34.1	38.89	0	93.546	2690900000	67	27.7848	27.9016	27.6389	NaN	9	5	4	0	0.14647	0.262692	1.63308	Q15293	Q15293	Reticulocalbin-1	RCN1	2714	sp|Q15293|RCN1_HUMAN Reticulocalbin-1 OS=Homo sapiens OX=9606 GN=RCN1 PE=1 SV=1
25.3782	26.2064	25.8086	26.3265	26.5141	25.9253	25.7599	25.6971	NaN	25.7476	NaN	25.2396	25.8775	NaN	NaN			6	6	6	23.7	23.7	23.7	54.088	0	35.161	641180000	25	25.8619	26.0467	25.7825	25.5585	11	5	4	2	0.296927	0.264243	1.1269	Q9BRR6;H3BRS6;H3BTH4;H3BN66;H3BU35	Q9BRR6;H3BRS6	ADP-dependent glucokinase	ADPGK	3397	sp|Q9BRR6|ADPGK_HUMAN ADP-dependent glucokinase OS=Homo sapiens OX=9606 GN=ADPGK PE=1 SV=1;tr|H3BRS6|H3BRS6_HUMAN ADP-dependent glucokinase (Fragment) OS=Homo sapiens OX=9606 GN=ADPGK PE=1 SV=1
26.633	26.5653	26.8927	27.0218	26.917	NaN	26.7657	26.5504	26.4966	26.3406	NaN	NaN	25.6683	26.135	NaN			4	4	4	24	24	24	27.388	0	51.801	1201100000	33	26.5442	26.8059	26.5383	25.9016	11	5	4	2	0.0713067	0.267622	2.12393	Q96EY8;S4R3P5;F5H4Z7;A0A087X114;S4R3Z1	Q96EY8;S4R3P5;F5H4Z7	Cob(I)yrinic acid a,c-diamide adenosyltransferase, mitochondrial	MMAB	3267	sp|Q96EY8|MMAB_HUMAN Corrinoid adenosyltransferase OS=Homo sapiens OX=9606 GN=MMAB PE=1 SV=1;tr|S4R3P5|S4R3P5_HUMAN Corrinoid adenosyltransferase OS=Homo sapiens OX=9606 GN=MMAB PE=1 SV=1;tr|F5H4Z7|F5H4Z7_HUMAN Corrinoid adenosyltransferase OS=Homo sapiens
26.4573	26.0387	25.347	23.5665	25.5429	NaN	26.1505	25.4643	24.296	24.5681	NaN	NaN	NaN	22.5602	NaN			9	9	9	25.5	25.5	25.5	44.965	0	39.511	1047000000	53	24.9991	25.3905	25.1197	22.5602	10	5	4	1	0.700036	0.270752	0.401488	Q8NC51	Q8NC51	Plasminogen activator inhibitor 1 RNA-binding protein	SERBP1	3078	sp|Q8NC51|PAIRB_HUMAN Plasminogen activator inhibitor 1 RNA-binding protein OS=Homo sapiens OX=9606 GN=SERBP1 PE=1 SV=2
25.8597	25.78	25.6897	26.8909	26.2298	26.3087	25.8591	25.6484	NaN	25.4368	25.5763	NaN	26.689	26.0345	NaN			6	6	6	22	22	22	44.049	0	31.207	570820000	19	26.0002	26.09	25.8133	26.0999	12	5	4	3	0.384782	0.276778	0.926984	Q14344	Q14344	Guanine nucleotide-binding protein subunit alpha-13	GNA13	2662	sp|Q14344|GNA13_HUMAN Guanine nucleotide-binding protein subunit alpha-13 OS=Homo sapiens OX=9606 GN=GNA13 PE=1 SV=2
26.8479	27.4387	26.8441	26.6245	26.658	NaN	27.0357	27.2014	26.228	25.9325	NaN	NaN	NaN	NaN	NaN			9	3	3	44.8	12.7	12.7	29.051	0	15.733	876220000	19	26.7568	26.8826	26.5994	NaN	9	5	4	0	0.40147	0.283229	0.893086	H7C2K6;X6RC15	H7C2K6;X6RC15		EPB41L1	1161	tr|H7C2K6|H7C2K6_HUMAN Band 4.1-like protein 1 (Fragment) OS=Homo sapiens OX=9606 GN=EPB41L1 PE=1 SV=1;tr|X6RC15|X6RC15_HUMAN Band 4.1-like protein 1 (Fragment) OS=Homo sapiens OX=9606 GN=EPB41L1 PE=1 SV=1
25.1603	25.4809	25.1806	25.8123	25.8822	NaN	25.1352	24.7564	25.6273	25.2884	NaN	25.095	NaN	NaN	NaN			6	6	6	45.5	45.5	45.5	22.417	0	29.616	553950000	23	25.3419	25.5033	25.2018	25.095	10	5	4	1	0.238903	0.301402	1.28734	O15498	O15498	Synaptobrevin homolog YKT6	YKT6	1386	sp|O15498|YKT6_HUMAN Synaptobrevin homolog YKT6 OS=Homo sapiens OX=9606 GN=YKT6 PE=1 SV=1
27.0844	27.1158	26.9924	27.0238	26.7442	NaN	27.0579	26.9275	26.4462	26.3258	NaN	NaN	NaN	NaN	NaN			9	9	9	42.1	42.1	42.1	46.98	0	152.84	1745300000	43	26.8576	26.9921	26.6893	NaN	9	5	4	0	0.125106	0.302765	1.74166	Q9NWQ8	Q9NWQ8	Phosphoprotein associated with glycosphingolipid-enriched microdomains 1	PAG1	3673	sp|Q9NWQ8|PHAG1_HUMAN Phosphoprotein associated with glycosphingolipid-enriched microdomains 1 OS=Homo sapiens OX=9606 GN=PAG1 PE=1 SV=2
25.2215	26.1552	24.9996	25.8212	26.4916	NaN	24.9299	24.7492	26.297	25.741	NaN	23.6703	NaN	25.7027	NaN			5	5	5	44.3	44.3	44.3	21.855	0	35.26	507630000	19	25.4345	25.7378	25.4293	24.6865	11	5	4	2	0.513261	0.308527	0.688569	Q9UL26;J3QR51;Q13636	Q9UL26	Ras-related protein Rab-22A	RAB22A	3809	sp|Q9UL26|RB22A_HUMAN Ras-related protein Rab-22A OS=Homo sapiens OX=9606 GN=RAB22A PE=1 SV=2
26.9647	27.379	26.6031	25.8606	25.912	NaN	27.2271	26.8891	25.306	25.4132	23.4951	23.4964	22.4177	22.6439	NaN			27	27	27	34.3	34.3	34.3	145.42	0	323.31	4471000000	131	25.3545	26.5439	26.2088	23.0133	13	5	4	4	0.561116	0.335033	0.610029	E9PMS6;A0A0A0MTE2;E9PMT2;F8WD26;J3KP06;Q8WWI1;E9PMP7;H0Y424;H0YDQ3;H0YDG6;H0YE95;E9PK58;E9PJ10;U3KQE6;E9PLU6	E9PMS6;A0A0A0MTE2;E9PMT2;F8WD26;J3KP06;Q8WWI1;E9PMP7;H0Y424	LIM domain only protein 7	LMO7	899	tr|E9PMS6|E9PMS6_HUMAN LIM domain only protein 7 OS=Homo sapiens OX=9606 GN=LMO7 PE=1 SV=1;tr|A0A0A0MTE2|A0A0A0MTE2_HUMAN LIM domain only protein 7 OS=Homo sapiens OX=9606 GN=LMO7 PE=1 SV=1;tr|E9PMT2|E9PMT2_HUMAN LIM domain only protein 7 OS=Homo sapiens O
25.9745	26.089	25.7443	26.4848	26.0815	NaN	25.8724	25.9218	25.7724	25.3901	25.4321	26.1657	26.3183	NaN	NaN			7	7	7	14	14	14	71.428	0	132.07	623100000	28	25.9372	26.0748	25.7392	25.972	12	5	4	3	0.0924178	0.335638	1.94816	Q16643;D6R9W4;D6RFI1;D6R9Q9;D6RCR4	Q16643;D6R9W4	Drebrin	DBN1	2763	sp|Q16643|DREB_HUMAN Drebrin OS=Homo sapiens OX=9606 GN=DBN1 PE=1 SV=4;tr|D6R9W4|D6R9W4_HUMAN Drebrin (Fragment) OS=Homo sapiens OX=9606 GN=DBN1 PE=1 SV=1
26.6176	26.8673	26.8229	27.0359	27.5933	NaN	26.8713	26.626	26.4721	26.5872	NaN	NaN	NaN	NaN	NaN			5	5	5	41.1	41.1	41.1	20.568	0	60.482	1390600000	33	26.8326	26.9874	26.6392	NaN	9	5	4	0	0.12776	0.34824	1.72725	M0R208;Q16740	M0R208;Q16740	ATP-dependent Clp protease proteolytic subunit;ATP-dependent Clp protease proteolytic subunit, mitochondrial	CLPP	1280	tr|M0R208|M0R208_HUMAN ATP-dependent Clp protease proteolytic subunit OS=Homo sapiens OX=9606 GN=CLPP PE=1 SV=1;sp|Q16740|CLPP_HUMAN ATP-dependent Clp protease proteolytic subunit, mitochondrial OS=Homo sapiens OX=9606 GN=CLPP PE=1 SV=1
26.6882	27.3875	26.1833	26.5235	25.7519	NaN	26.4742	26.6214	25.1757	26.2775	NaN	NaN	NaN	NaN	NaN			16	5	5	47.8	16.6	16.6	49.857	0	43.6	821990000	29	26.3426	26.5069	26.1372	NaN	9	5	4	0	0.410516	0.369658	0.875143	Q9BUF5;K7ESM5;K7ES63;K7EL29;K7EN98;K7ESQ3;K7EQT3;K7EJ64;K7ERA8;K7EJZ4;K7EPE5	Q9BUF5;K7ESM5	Tubulin beta-6 chain	TUBB6	3421	sp|Q9BUF5|TBB6_HUMAN Tubulin beta-6 chain OS=Homo sapiens OX=9606 GN=TUBB6 PE=1 SV=1;tr|K7ESM5|K7ESM5_HUMAN Tubulin beta chain (Fragment) OS=Homo sapiens OX=9606 GN=TUBB6 PE=1 SV=1
24.8124	25.4484	25.2729	25.1635	25.7668	NaN	25.0172	25.0634	24.9505	24.5776	NaN	NaN	NaN	NaN	NaN			12	12	12	9.2	9.2	9.2	197.58	0	69.38	643610000	30	25.1192	25.2928	24.9021	NaN	9	5	4	0	0.0962761	0.390656	1.92038	P52948;A0A3B3ITD8;H7C3P6;H0YDF4;H0YCT1;H0YEN4	P52948;A0A3B3ITD8;H7C3P6	Nuclear pore complex protein Nup98-Nup96;Nuclear pore complex protein Nup98;Nuclear pore complex protein Nup96	NUP98	2270	sp|P52948|NUP98_HUMAN Nuclear pore complex protein Nup98-Nup96 OS=Homo sapiens OX=9606 GN=NUP98 PE=1 SV=4;tr|A0A3B3ITD8|A0A3B3ITD8_HUMAN Nuclear pore complex protein Nup98-Nup96 OS=Homo sapiens OX=9606 GN=NUP98 PE=1 SV=1;tr|H7C3P6|H7C3P6_HUMAN Nuclear pore
26.7176	26.9099	26.9683	26.5417	26.8899	NaN	27.125	26.8778	25.9465	25.6578	NaN	NaN	NaN	NaN	NaN			16	12	11	51.5	41.6	39.5	58.042	0	153.83	1940200000	46	26.6261	26.8055	26.4018	NaN	9	5	4	0	0.252776	0.403693	1.24621	Q13177;H7C1X3;B1AKS5	Q13177	Serine/threonine-protein kinase PAK 2;PAK-2p27;PAK-2p34	PAK2	2585	sp|Q13177|PAK2_HUMAN Serine/threonine-protein kinase PAK 2 OS=Homo sapiens OX=9606 GN=PAK2 PE=1 SV=3
25.9225	26.2543	26.1364	26.7667	26.7363	26.0582	25.6697	26.2528	NaN	25.8389	NaN	26.6115	NaN	NaN	NaN			5	5	5	28.6	28.6	28.6	23.411	0	14.892	822650000	28	26.2247	26.3632	25.9549	26.6115	10	5	4	1	0.105994	0.408345	1.85495	Q5T9B7;P00568;H0YID2;Q9Y6K8	Q5T9B7;P00568	Adenylate kinase isoenzyme 1	AK1	1625	tr|Q5T9B7|Q5T9B7_HUMAN Adenylate kinase isoenzyme 1 OS=Homo sapiens OX=9606 GN=AK1 PE=1 SV=1;sp|P00568|KAD1_HUMAN Adenylate kinase isoenzyme 1 OS=Homo sapiens OX=9606 GN=AK1 PE=1 SV=3
27.8596	27.405	27.4773	25.5178	27.4785	NaN	26.849	27.1469	26.1568	26.7729	25.4204	25.4708	NaN	NaN	NaN			7	7	7	40.7	40.7	40.7	16.06	0	24.435	1958000000	44	26.6868	27.1477	26.7314	25.4456	11	5	4	2	0.43691	0.416267	0.824378	P39019;M0R2L9;M0QYF7;M0R140;A0A075B6E2	P39019;M0R2L9;M0QYF7;M0R140	40S ribosomal protein S19	RPS19	2097	sp|P39019|RS19_HUMAN 40S ribosomal protein S19 OS=Homo sapiens OX=9606 GN=RPS19 PE=1 SV=2;tr|M0R2L9|M0R2L9_HUMAN 40S ribosomal protein S19 (Fragment) OS=Homo sapiens OX=9606 GN=RPS19 PE=1 SV=1;tr|M0QYF7|M0QYF7_HUMAN 40S ribosomal protein S19 (Fragment) OS=
25.9001	26.2692	26.2829	26.0205	26.1504	24.8738	NaN	26.3067	25.8622	25.6938	25.8791	25.5692	25.9791	25.7856	NaN			8	8	8	27.8	27.8	27.8	33.824	0	26.374	840680000	38	25.8902	26.1246	25.6841	25.8033	13	5	4	4	0.154373	0.440488	1.59666	P19623;K7EL89;K7EKM4;K7ESL0;K7EQ47	P19623	Spermidine synthase	SRM	1886	sp|P19623|SPEE_HUMAN Spermidine synthase OS=Homo sapiens OX=9606 GN=SRM PE=1 SV=1
28.8914	29.0615	28.9853	28.6232	28.853	NaN	29.219	29.0047	27.7044	27.8067	NaN	NaN	26.7889	26.5227	NaN			3	3	3	27.2	27.2	27.2	15.512	0	66.53	3008100000	53	28.3146	28.8829	28.4337	26.6558	11	5	4	2	0.248216	0.449188	1.25951	Q9Y6H1;Q5T1J5	Q9Y6H1;Q5T1J5	Coiled-coil-helix-coiled-coil-helix domain-containing protein 2;Putative coiled-coil-helix-coiled-coil-helix domain-containing protein CHCHD2P9, mitochondrial	CHCHD2;CHCHD2P9	2849	sp|Q9Y6H1|CHCH2_HUMAN Coiled-coil-helix-coiled-coil-helix domain-containing protein 2 OS=Homo sapiens OX=9606 GN=CHCHD2 PE=1 SV=1;sp|Q5T1J5|CHCH9_HUMAN Putative coiled-coil-helix-coiled-coil-helix domain-containing protein CHCHD2P9, mitochondrial OS=Homo s
27.1283	26.4538	26.5435	26.887	26.6227	NaN	26.5584	26.8647	25.6349	25.9257	NaN	NaN	NaN	NaN	NaN			9	9	9	8.8	8.8	8.8	152.1	0	68.599	1591300000	58	26.5132	26.7271	26.2459	NaN	9	5	4	0	0.135043	0.481171	1.68914	Q13428;A0A3B3IS06;E7ETY2;A0A6I8PRA0;H0Y8Y7;A0A2R8Y857;A0A2R8Y4M7;H0YA99	Q13428;A0A3B3IS06;E7ETY2;A0A6I8PRA0;H0Y8Y7	Treacle protein	TCOF1	2606	sp|Q13428|TCOF_HUMAN Treacle protein OS=Homo sapiens OX=9606 GN=TCOF1 PE=1 SV=3;tr|A0A3B3IS06|A0A3B3IS06_HUMAN Treacle protein (Fragment) OS=Homo sapiens OX=9606 GN=TCOF1 PE=1 SV=1;tr|E7ETY2|E7ETY2_HUMAN Treacle protein OS=Homo sapiens OX=9606 GN=TCOF1 PE=
26.2718	27.0006	25.8557	25.8801	26.7701	NaN	25.9327	25.57	26.2304	25.7464	NaN	NaN	NaN	25.7584	NaN			6	6	6	44.4	44.4	44.4	20.692	0	42.399	765860000	38	26.1016	26.3556	25.8699	25.7584	10	5	4	1	0.13809	0.485727	1.67377	Q9BYD1;E5RJI7;H0YAX3	Q9BYD1;E5RJI7	39S ribosomal protein L13, mitochondrial	MRPL13	3463	sp|Q9BYD1|RM13_HUMAN 39S ribosomal protein L13, mitochondrial OS=Homo sapiens OX=9606 GN=MRPL13 PE=1 SV=1;tr|E5RJI7|E5RJI7_HUMAN 39S ribosomal protein L13, mitochondrial (Fragment) OS=Homo sapiens OX=9606 GN=MRPL13 PE=1 SV=8
28.9633	28.985	28.8886	28.2827	29.0406	NaN	28.8119	28.3157	27.8315	28.252	NaN	NaN	NaN	NaN	NaN			17	3	3	40.3	9.5	9.5	22.35	0	19.834	2844800000	38	28.5968	28.8321	28.3028	NaN	9	5	4	0	0.0606143	0.529281	2.23397	P16402	P16402	Histone H1.3	HIST1H1D	1845	sp|P16402|H13_HUMAN Histone H1.3 OS=Homo sapiens OX=9606 GN=H1-3 PE=1 SV=2
26.8636	26.8241	27.2723	26.837	26.8186	25.63	26.9763	26.8963	NaN	25.9237	NaN	NaN	NaN	NaN	NaN			5	5	5	32.2	32.2	32.2	29.062	0	42.303	1027700000	27	26.6713	26.9231	26.3566	NaN	9	5	4	0	0.115203	0.566551	1.79811	O75822;H0YGJ7;H0YLP3	O75822	Eukaryotic translation initiation factor 3 subunit J	EIF3J	1514	sp|O75822|EIF3J_HUMAN Eukaryotic translation initiation factor 3 subunit J OS=Homo sapiens OX=9606 GN=EIF3J PE=1 SV=2
26.5365	25.9183	25.5175	24.4207	25.2207	NaN	27.5452	25.5838	23.2454	23.2397	NaN	NaN	NaN	NaN	NaN			11	11	11	22.4	22.4	22.4	58.677	0	66.916	980040000	37	25.2475	25.5227	24.9035	NaN	9	5	4	0	0.554076	0.619191	0.621319	E9PDI4;O00515;A0A0J9YYF6;A0A0J9YW63;A0A0J9YVY2	E9PDI4;O00515	Ladinin-1	LAD1	844	tr|E9PDI4|E9PDI4_HUMAN Ladinin-1 OS=Homo sapiens OX=9606 GN=LAD1 PE=1 SV=1;sp|O00515|LAD1_HUMAN Ladinin-1 OS=Homo sapiens OX=9606 GN=LAD1 PE=1 SV=2
26.5918	26.633	26.9536	27.7515	27.5451	NaN	25.7099	26.1807	26.8171	26.7694	NaN	NaN	NaN	NaN	NaN			2	2	2	14.7	14.7	14.7	23.026	0.0013561	2.8942	579020000	14	26.7724	27.095	26.3693	NaN	9	5	4	0	0.0796428	0.725718	2.04904	Q99470	Q99470	Stromal cell-derived factor 2	SDF2	3346	sp|Q99470|SDF2_HUMAN Stromal cell-derived factor 2 OS=Homo sapiens OX=9606 GN=SDF2 PE=1 SV=2
24.5956	NaN	24.6013	24.1294	24.6139	25.2815	NaN	24.7815	25.1237	24.7852	NaN	NaN	NaN	NaN	NaN	+	3NT_Control	9	9	8	7.3	7.3	6.5	166.8	0	31.512	463820000	19	24.739	24.4851	24.993	NaN	8	4	4	0	0.0257887	-0.507932	-2.94473	H0YAC6;A0A494BZW2;E9PEM5;A0A494C1L5;P50851;A0A494C0R9;H0Y9N9;A0A3B3ISK3;A0A3B3IU76;A0A3B3IS13	H0YAC6;A0A494BZW2;E9PEM5;A0A494C1L5;P50851	Lipopolysaccharide-responsive and beige-like anchor protein	LRBA	379	tr|H0YAC6|H0YAC6_HUMAN Lipopolysaccharide-responsive and beige-like anchor protein (Fragment) OS=Homo sapiens OX=9606 GN=LRBA PE=1 SV=1;tr|A0A494BZW2|A0A494BZW2_HUMAN Lipopolysaccharide-responsive and beige-like anchor protein (Fragment) OS=Homo sapiens OX
24.6932	24.7199	24.7208	NaN	24.4824	NaN	24.9915	24.9872	24.9825	24.9103	NaN	24.544	24.5195	24.8508	NaN	+	3NT_Control	4	4	4	14.9	14.9	14.9	47.091	0	18.362	428660000	29	24.7638	24.6541	24.9679	24.6381	11	4	4	3	0.00208029	-0.313787	-5.1671	Q9H553;A0A0A0MTE0	Q9H553	Alpha-1,3/1,6-mannosyltransferase ALG2	ALG2	3531	sp|Q9H553|ALG2_HUMAN Alpha-1,3/1,6-mannosyltransferase ALG2 OS=Homo sapiens OX=9606 GN=ALG2 PE=1 SV=1
25.8965	25.8773	25.6399	NaN	25.91	25.6806	25.448	25.7057	NaN	25.4822	NaN	25.9141	25.579	26.2414	NaN	+	3NT_Control	4	4	4	24.5	24.5	24.5	25.301	0	18.196	585130000	24	25.7613	25.8309	25.5791	25.9115	11	4	4	3	0.0341906	0.251796	2.7299	Q8N4T8;H0Y962;D6RAV8;D6RJF4;D6RGF2	Q8N4T8;H0Y962	Carbonyl reductase family member 4	CBR4	3054	sp|Q8N4T8|CBR4_HUMAN Carbonyl reductase family member 4 OS=Homo sapiens OX=9606 GN=CBR4 PE=1 SV=3;tr|H0Y962|H0Y962_HUMAN Carbonyl reductase family member 4 (Fragment) OS=Homo sapiens OX=9606 GN=CBR4 PE=1 SV=1
26.4738	26.7515	26.2999	NaN	27.0298	25.6976	26.1271	25.9899	26.4595	NaN	NaN	NaN	NaN	NaN	NaN	+	3NT_Control	4	4	4	10	10	10	34.412	0	36.887	649060000	26	26.3536	26.6388	26.0685	NaN	8	4	4	0	0.0444424	0.570251	2.53395	Q9HA64;I3L378;I3L2G3;I3L139	Q9HA64;I3L378;I3L2G3;I3L139	Ketosamine-3-kinase	FN3KRP	3560	sp|Q9HA64|KT3K_HUMAN Ketosamine-3-kinase OS=Homo sapiens OX=9606 GN=FN3KRP PE=1 SV=2;tr|I3L378|I3L378_HUMAN Protein-ribulosamine 3-kinase (Fragment) OS=Homo sapiens OX=9606 GN=FN3KRP PE=1 SV=8;tr|I3L2G3|I3L2G3_HUMAN Protein-ribulosamine 3-kinase (Fragment)
24.4544	24.2453	24.3355	NaN	24.7988	23.7781	23.5111	24.4619	NaN	23.5898	NaN	NaN	24.4975	24.4267	NaN	+	3NT_Control	6	6	6	32.4	32.4	32.4	30.156	0	10.921	176560000	14	24.2099	24.4585	23.8352	24.4621	10	4	4	2	0.0456589	0.623287	2.51395	Q13084;A2IDC6;A2IDC7;Q4TT37	Q13084;A2IDC6;A2IDC7;Q4TT37	39S ribosomal protein L28, mitochondrial	MRPL28	2574	sp|Q13084|RM28_HUMAN 39S ribosomal protein L28, mitochondrial OS=Homo sapiens OX=9606 GN=MRPL28 PE=1 SV=4;tr|A2IDC6|A2IDC6_HUMAN 39S ribosomal protein L28, mitochondrial (Fragment) OS=Homo sapiens OX=9606 GN=MRPL28 PE=1 SV=1;tr|A2IDC7|A2IDC7_HUMAN 39S ribo
25.661	NaN	24.7375	24.5215	25.073	25.9124	25.632	25.3267	NaN	25.5173	25.6269	25.6626	25.9641	25.9097	NaN			2	2	2	30.1	30.1	30.1	12.452	0	94.721	563450000	28	25.4621	24.9983	25.5971	25.7908	12	4	4	4	0.0738453	-0.598831	-2.16227	P63172	P63172	Dynein light chain Tctex-type 1	DYNLT1	2424	sp|P63172|DYLT1_HUMAN Dynein light chain Tctex-type 1 OS=Homo sapiens OX=9606 GN=DYNLT1 PE=1 SV=1
24.3586	24.591	25.2214	25.5911	NaN	NaN	24.9307	25.5281	25.6302	25.7173	NaN	26.3312	25.3326	NaN	NaN			3	3	3	22.3	22.3	22.3	26.005	0	11.459	379710000	17	25.3232	24.9405	25.4516	25.8319	10	4	4	2	0.177401	-0.51108	-1.52789	Q9Y3A6;B1AKT3;M0R072	Q9Y3A6;B1AKT3	Transmembrane emp24 domain-containing protein 5	TMED5	3884	sp|Q9Y3A6|TMED5_HUMAN Transmembrane emp24 domain-containing protein 5 OS=Homo sapiens OX=9606 GN=TMED5 PE=1 SV=1;tr|B1AKT3|B1AKT3_HUMAN Transmembrane emp24 domain-containing protein 5 OS=Homo sapiens OX=9606 GN=TMED5 PE=1 SV=1
NaN	25.1212	25.7836	25.2651	25.1433	25.8514	25.2727	25.8124	26.2982	NaN	NaN	NaN	NaN	NaN	NaN			3	3	3	10.3	10.3	10.3	38.206	0	8.2905	253270000	14	25.5685	25.3283	25.8087	NaN	8	4	4	0	0.115239	-0.480369	-1.84087	P56937;V9GYN3	P56937	3-keto-steroid reductase	HSD17B7	2321	sp|P56937|DHB7_HUMAN 3-keto-steroid reductase/17-beta-hydroxysteroid dehydrogenase 7 OS=Homo sapiens OX=9606 GN=HSD17B7 PE=1 SV=1
NaN	24.9798	24.9554	25.7564	26.2735	26.0172	NaN	24.9301	26.7347	26.0918	26.4074	26.1647	26.2959	26.6484	NaN			12	12	12	7.1	7.1	7.1	236.02	0	63.703	896000000	49	25.9379	25.4913	25.9434	26.3791	12	4	4	4	0.394043	-0.452147	-0.91796	F8VPD4;P27708;H7C2E4;H7BZB3	F8VPD4;P27708	CAD protein;Glutamine-dependent carbamoyl-phosphate synthase;Aspartate carbamoyltransferase;Dihydroorotase	CAD	969	tr|F8VPD4|F8VPD4_HUMAN Aspartate carbamoyltransferase OS=Homo sapiens OX=9606 GN=CAD PE=1 SV=1;sp|P27708|PYR1_HUMAN CAD protein OS=Homo sapiens OX=9606 GN=CAD PE=1 SV=3
24.993	25.0477	24.6948	NaN	25.044	26.108	25.397	25.2807	NaN	24.7352	NaN	NaN	NaN	24.7558	NaN			4	4	4	15.6	15.6	15.6	57.193	0	30.009	336460000	20	25.1174	24.9449	25.3802	24.7558	9	4	4	1	0.189916	-0.435329	-1.47787	O43660;D6RA26;H0YA24	O43660;D6RA26	Pleiotropic regulator 1	PLRG1	1412	sp|O43660|PLRG1_HUMAN Pleiotropic regulator 1 OS=Homo sapiens OX=9606 GN=PLRG1 PE=1 SV=1;tr|D6RA26|D6RA26_HUMAN Pleiotropic regulator 1 (Fragment) OS=Homo sapiens OX=9606 GN=PLRG1 PE=1 SV=1
24.9439	24.4247	24.9761	NaN	24.0652	24.7298	25.1104	NaN	24.8447	25.4081	NaN	NaN	24.0929	NaN	NaN			4	4	4	15.5	15.5	15.5	39.607	0	28.039	286690000	17	24.7329	24.6025	25.0233	24.0929	9	4	4	1	0.164978	-0.420797	-1.58093	Q15166;C9JZ99;F8WD41	Q15166;C9JZ99;F8WD41	Serum paraoxonase/lactonase 3	PON3	2709	sp|Q15166|PON3_HUMAN Serum paraoxonase/lactonase 3 OS=Homo sapiens OX=9606 GN=PON3 PE=1 SV=3;tr|C9JZ99|C9JZ99_HUMAN Serum paraoxonase/lactonase 3 OS=Homo sapiens OX=9606 GN=PON3 PE=1 SV=1;tr|F8WD41|F8WD41_HUMAN Serum paraoxonase/lactonase 3 OS=Homo sapiens
25.8876	NaN	25.0126	26.0124	25.7575	26.4818	26.0098	25.8471	NaN	25.7677	26.4256	26.5616	26.4658	26.1164	NaN			6	6	6	23.3	23.3	23.3	43.215	0	30.2	819010000	30	26.0288	25.6675	26.0266	26.3923	12	4	4	4	0.240307	-0.359087	-1.30311	P53582;H0Y955;H0Y903;H0YAI3	P53582;H0Y955	Methionine aminopeptidase 1	METAP1	2277	sp|P53582|MAP11_HUMAN Methionine aminopeptidase 1 OS=Homo sapiens OX=9606 GN=METAP1 PE=1 SV=2;tr|H0Y955|H0Y955_HUMAN Methionine aminopeptidase 1 (Fragment) OS=Homo sapiens OX=9606 GN=METAP1 PE=1 SV=1
24.9456	25.3318	24.9838	NaN	24.1585	NaN	25.184	25.2225	25.2438	25.2056	NaN	NaN	NaN	NaN	NaN			6	6	6	17	17	17	43.089	0	18.445	382470000	15	25.0345	24.8549	25.214	NaN	8	4	4	0	0.198107	-0.359061	-1.44677	Q92604	Q92604	Acyl-CoA:lysophosphatidylglycerol acyltransferase 1	LPGAT1	3180	sp|Q92604|LGAT1_HUMAN Acyl-CoA:lysophosphatidylglycerol acyltransferase 1 OS=Homo sapiens OX=9606 GN=LPGAT1 PE=1 SV=1
25.8447	25.7208	25.7696	NaN	24.7415	NaN	26.1245	25.5569	25.8759	25.9493	NaN	NaN	25.598	25.1909	NaN			4	4	4	7.4	7.4	7.4	65.699	0	10.656	417870000	13	25.6372	25.5192	25.8766	25.3944	10	4	4	2	0.258193	-0.357486	-1.24897	Q969N2;A0A1W2PNP0;A0A1W2PPS0;A0A1W2PPC3;A0A1W2PP57;A0A1W2PQN1;A0A1W2PPK4;A0A1W2PQY1;A0A1W2PP53;A0A1W2PPQ7;A0A1W2PPR6;A0A1W2PRZ8;A0A1W2PRV7;A0A1W2PR92;A0A1W2PP13;A0A1W2PR70;A0A1W2PSC5;A0A1W2PRH2;A0A1W2PPI8;A0A1W2PQ29;H7C2Y2;A0A1W2PPU8;A0A1W2PNW9;A0A1W2PRG1;A0A1W2PRH8;A0A1W2PQ52	Q969N2;A0A1W2PNP0;A0A1W2PPS0;A0A1W2PPC3;A0A1W2PP57;A0A1W2PQN1;A0A1W2PPK4;A0A1W2PQY1;A0A1W2PP53;A0A1W2PPQ7;A0A1W2PPR6;A0A1W2PRZ8	GPI transamidase component PIG-T	PIGT	274	sp|Q969N2|PIGT_HUMAN GPI transamidase component PIG-T OS=Homo sapiens OX=9606 GN=PIGT PE=1 SV=1;tr|A0A1W2PNP0|A0A1W2PNP0_HUMAN GPI transamidase component PIG-T (Fragment) OS=Homo sapiens OX=9606 GN=PIGT PE=1 SV=1;tr|A0A1W2PPS0|A0A1W2PPS0_HUMAN GPI transami
25.5758	25.5442	25.1991	NaN	25.44	NaN	25.8666	25.6244	25.9506	25.4658	NaN	NaN	NaN	NaN	NaN			4	4	4	23.9	23.9	23.9	31.444	0	13.613	376100000	20	25.5833	25.4398	25.7268	NaN	8	4	4	0	0.0863677	-0.287051	-2.04895	O75663	O75663	TIP41-like protein	TIPRL	1505	sp|O75663|TIPRL_HUMAN TIP41-like protein OS=Homo sapiens OX=9606 GN=TIPRL PE=1 SV=2
25.0213	25.0583	NaN	24.1465	24.1944	24.9211	24.5835	25.1354	NaN	24.924	NaN	NaN	NaN	NaN	NaN			3	3	3	19.3	19.3	19.3	30.062	0	8.8919	259870000	16	24.7481	24.6051	24.891	NaN	8	4	4	0	0.340247	-0.285836	-1.03575	Q9NQ88;A0A0U1RQD1	Q9NQ88;A0A0U1RQD1	Fructose-2,6-bisphosphatase TIGAR	TIGAR	3611	sp|Q9NQ88|TIGAR_HUMAN Fructose-2,6-bisphosphatase TIGAR OS=Homo sapiens OX=9606 GN=TIGAR PE=1 SV=1;tr|A0A0U1RQD1|A0A0U1RQD1_HUMAN Chromosome 12 open reading frame 5, isoform CRA_b OS=Homo sapiens OX=9606 GN=TIGAR PE=1 SV=1
25.5505	25.5761	24.9469	26.3855	NaN	26.3466	25.7987	NaN	25.6688	25.7246	25.3072	NaN	25.983	25.1452	NaN			9	9	9	26.1	26.1	26.1	67.404	0	71.752	689890000	34	25.6757	25.6147	25.8847	25.4785	11	4	4	3	0.449792	-0.269955	-0.808259	P50895;A0A087WXM8;K7ENU8	P50895;A0A087WXM8	Basal cell adhesion molecule	BCAM	2232	sp|P50895|BCAM_HUMAN Basal cell adhesion molecule OS=Homo sapiens OX=9606 GN=BCAM PE=1 SV=2;tr|A0A087WXM8|A0A087WXM8_HUMAN Basal cell adhesion molecule OS=Homo sapiens OX=9606 GN=BCAM PE=1 SV=1
25.6362	NaN	25.9656	25.5994	25.7665	26.5128	25.8657	25.8849	NaN	25.7782	26.3551	26.1204	25.9587	26.0727	NaN			4	4	4	13.7	13.7	13.7	44.693	0	57.62	618340000	32	25.9597	25.7419	26.0104	26.1267	12	4	4	4	0.203709	-0.268439	-1.42618	C9JG97;C9JEH3;Q13685;C9JTS3;H7C0R2	C9JG97;C9JEH3;Q13685;C9JTS3	Angio-associated migratory cell protein	AAMP	604	tr|C9JG97|C9JG97_HUMAN Angio-associated migratory cell protein OS=Homo sapiens OX=9606 GN=AAMP PE=1 SV=1;tr|C9JEH3|C9JEH3_HUMAN Angio-associated migratory cell protein OS=Homo sapiens OX=9606 GN=AAMP PE=1 SV=1;sp|Q13685|AAMP_HUMAN Angio-associated migrator
25.5475	25.2798	25.144	NaN	24.9596	NaN	25.3667	25.2722	25.7193	25.571	NaN	NaN	NaN	NaN	NaN			8	8	8	25.5	25.5	25.5	68.028	0	72.519	592860000	24	25.3575	25.2327	25.4823	NaN	8	4	4	0	0.168679	-0.249599	-1.56474	A0A087WWM6;O43272;E7EQL6;C9JIW4;H7C363	A0A087WWM6;O43272;E7EQL6	Proline dehydrogenase 1, mitochondrial	PRODH	50	tr|A0A087WWM6|A0A087WWM6_HUMAN Proline dehydrogenase OS=Homo sapiens OX=9606 GN=PRODH PE=1 SV=1;sp|O43272|PROD_HUMAN Proline dehydrogenase 1, mitochondrial OS=Homo sapiens OX=9606 GN=PRODH PE=1 SV=3;tr|E7EQL6|E7EQL6_HUMAN Proline dehydrogenase OS=Homo sapi
25.1583	25.5017	24.6369	NaN	25.8671	NaN	25.5177	25.7228	25.2505	25.6636	NaN	25.4585	25.6552	25.2344	NaN			5	5	5	57.7	57.7	57.7	15.383	0	18.727	702960000	38	25.4243	25.291	25.5387	25.4494	11	4	4	3	0.413652	-0.247677	-0.878127	Q8IXM3	Q8IXM3	39S ribosomal protein L41, mitochondrial	MRPL41	3021	sp|Q8IXM3|RM41_HUMAN 39S ribosomal protein L41, mitochondrial OS=Homo sapiens OX=9606 GN=MRPL41 PE=1 SV=1
26.4597	26.2537	25.0244	NaN	26.0545	25.7199	26.3241	26.2758	NaN	26.3225	25.5129	25.7396	25.5403	NaN	NaN			4	4	4	42.7	42.7	42.7	10.921	0	19.204	858220000	26	25.9298	25.9481	26.1606	25.5976	11	4	4	3	0.567324	-0.21249	-0.605027	Q9NP97;B1AKR6;Q8TF09;H3BQI1;H3BNG9;H3BPA0;Q7Z4M1	Q9NP97;B1AKR6;Q8TF09;H3BQI1	Dynein light chain roadblock-type 1;Dynein light chain roadblock-type 2	DYNLRB1;DYNLRB2	3598	sp|Q9NP97|DLRB1_HUMAN Dynein light chain roadblock-type 1 OS=Homo sapiens OX=9606 GN=DYNLRB1 PE=1 SV=3;tr|B1AKR6|B1AKR6_HUMAN Dynein light chain roadblock-type 1 OS=Homo sapiens OX=9606 GN=DYNLRB1 PE=1 SV=1;sp|Q8TF09|DLRB2_HUMAN Dynein light chain roadbloc
NaN	25.7782	25.5174	26.1161	25.4638	26.7496	25.4964	25.8669	25.5802	NaN	26.9494	26.8178	26.5602	26.3497	NaN			3	3	3	35.8	35.8	35.8	17.963	0	207.69	610920000	26	26.1038	25.7189	25.9233	26.6693	12	4	4	4	0.550327	-0.2044	-0.6326	E9PJK1;E9PRJ8;H0YDL9;H0YDJ9;E9PIF1;A6NMH8;P60033;E9PM31;H0YEE2	E9PJK1;E9PRJ8;H0YDL9;H0YDJ9;E9PIF1;A6NMH8;P60033	Tetraspanin;CD81 antigen	CD81	452	tr|E9PJK1|E9PJK1_HUMAN Tetraspanin OS=Homo sapiens OX=9606 GN=CD81 PE=1 SV=1;tr|E9PRJ8|E9PRJ8_HUMAN Tetraspanin (Fragment) OS=Homo sapiens OX=9606 GN=CD81 PE=1 SV=1;tr|H0YDL9|H0YDL9_HUMAN Tetraspanin (Fragment) OS=Homo sapiens OX=9606 GN=CD81 PE=1 SV=1;tr|
25.6224	25.17	NaN	26.953	26.3478	26.4311	26.2712	26.0442	NaN	26.1535	NaN	26.1262	NaN	25.9986	NaN			4	4	4	16.2	16.2	16.2	34.032	0	11.547	745130000	27	26.1118	26.0233	26.225	26.0624	10	4	4	2	0.633866	-0.201699	-0.501528	C9JG87;Q9NYK5	C9JG87;Q9NYK5	39S ribosomal protein L39, mitochondrial	MRPL39	608	tr|C9JG87|C9JG87_HUMAN 39S ribosomal protein L39, mitochondrial (Fragment) OS=Homo sapiens OX=9606 GN=MRPL39 PE=1 SV=1;sp|Q9NYK5|RM39_HUMAN 39S ribosomal protein L39, mitochondrial OS=Homo sapiens OX=9606 GN=MRPL39 PE=1 SV=3
25.2077	24.7715	24.6893	NaN	24.5525	24.6874	25.3031	25.189	NaN	24.7964	NaN	NaN	NaN	NaN	NaN			3	3	3	9.8	9.8	9.8	36.072	0	38.621	266020000	13	24.8996	24.8052	24.994	NaN	8	4	4	0	0.393963	-0.188726	-0.918125	P46736;A0A0A0MS96;X6RJS7;A0A087WZR3;H9KVA9;A0A0D9SF50	P46736;A0A0A0MS96;X6RJS7	Lys-63-specific deubiquitinase BRCC36	BRCC3	2156	sp|P46736|BRCC3_HUMAN Lys-63-specific deubiquitinase BRCC36 OS=Homo sapiens OX=9606 GN=BRCC3 PE=1 SV=2;tr|A0A0A0MS96|A0A0A0MS96_HUMAN Lys-63-specific deubiquitinase BRCC36 (Fragment) OS=Homo sapiens OX=9606 GN=BRCC3 PE=1 SV=1;tr|X6RJS7|X6RJS7_HUMAN Lys-63-
NaN	28.3872	27.8582	28.2989	27.6439	28.0732	27.463	28.7377	28.6621	NaN	28.0381	27.7493	28.1941	27.9769	NaN			9	9	9	42.2	42.2	42.2	37.535	0	17.958	1163000000	28	28.0902	28.0471	28.234	27.9896	12	4	4	4	0.608194	-0.18695	-0.540688	Q86W42	Q86W42	THO complex subunit 6 homolog	THOC6	2992	sp|Q86W42|THOC6_HUMAN THO complex subunit 6 homolog OS=Homo sapiens OX=9606 GN=THOC6 PE=1 SV=1
26.3476	25.7851	25.3399	NaN	25.7314	25.891	26.2252	26.0852	NaN	25.6683	NaN	NaN	NaN	NaN	NaN			3	3	3	22.7	22.7	22.7	20.913	0	17.017	679690000	16	25.8842	25.801	25.9674	NaN	8	4	4	0	0.514277	-0.166404	-0.692911	Q5JRI1;O75494;Q6IQ42;R4GMP8;Q8WXF0	Q5JRI1;O75494;Q6IQ42	Serine/arginine-rich splicing factor 10	SRSF10;FUSIP1	1498	tr|Q5JRI1|Q5JRI1_HUMAN Serine/arginine-rich-splicing factor 10 OS=Homo sapiens OX=9606 GN=SRSF10 PE=1 SV=1;sp|O75494|SRS10_HUMAN Serine/arginine-rich splicing factor 10 OS=Homo sapiens OX=9606 GN=SRSF10 PE=1 SV=1;tr|Q6IQ42|Q6IQ42_HUMAN FUSIP1 protein OS=Ho
29.2623	28.4789	28.5897	NaN	29.8221	29.687	27.9195	29.6402	NaN	29.5349	27.8482	29.3444	31.2995	31.4373	NaN			13	1	1	66.7	24.2	24.2	14.914	0	55.734	14487000000	92	29.4053	29.0382	29.1954	29.9824	12	4	4	4	0.776513	-0.157164	-0.296955	K7EK07;P84243;Q16695;K7EMV3;A0A590UJJ6;B4DEB1;K7ES00;Q6NXT2;K7EP01	K7EK07;P84243;Q16695;K7EMV3;A0A590UJJ6;B4DEB1;K7ES00;Q6NXT2;K7EP01	Histone H3;Histone H3.3;Histone H3.1t;Histone H3.3C	H3F3B;H3F3A;HIST3H3;H3F3C	1234	tr|K7EK07|K7EK07_HUMAN Histone H3 (Fragment) OS=Homo sapiens OX=9606 GN=H3-3B PE=1 SV=1;sp|P84243|H33_HUMAN Histone H3.3 OS=Homo sapiens OX=9606 GN=H3-3A PE=1 SV=2;sp|Q16695|H31T_HUMAN Histone H3.1t OS=Homo sapiens OX=9606 GN=H3-4 PE=1 SV=3;tr|K7EMV3|K7EMV
26.0471	25.3025	25.4867	NaN	25.4032	NaN	26.1204	25.9484	25.4663	25.3024	25.84	25.9033	25.2351	NaN	NaN			5	5	5	21.5	21.5	21.5	39.017	0	39.404	503190000	28	25.6414	25.5599	25.7094	25.6595	11	4	4	3	0.580043	-0.149493	-0.58472	Q96BW5;A0A0A0MSI3	Q96BW5	Phosphotriesterase-related protein	PTER	3241	sp|Q96BW5|PTER_HUMAN Phosphotriesterase-related protein OS=Homo sapiens OX=9606 GN=PTER PE=1 SV=1
NaN	24.951	25.1463	25.0167	24.791	25.0936	NaN	25.3037	24.9053	25.1948	25.4818	NaN	24.9954	25.5907	NaN			4	4	4	16.3	16.3	16.3	46.476	0	13.484	315040000	13	25.1337	24.9763	25.1243	25.356	11	4	4	3	0.235657	-0.148096	-1.31777	Q5VW32;F5GXQ0;Q5VW33	Q5VW32;F5GXQ0;Q5VW33	BRO1 domain-containing protein BROX	BROX	2877	sp|Q5VW32|BROX_HUMAN BRO1 domain-containing protein BROX OS=Homo sapiens OX=9606 GN=BROX PE=1 SV=1;tr|F5GXQ0|F5GXQ0_HUMAN BRO1 domain- and CAAX motif-containing protein OS=Homo sapiens OX=9606 GN=BROX PE=1 SV=1;tr|Q5VW33|Q5VW33_HUMAN BRO1 domain- and CAAX
25.722	25.5144	25.3967	NaN	25.6126	NaN	25.8003	25.2619	25.9407	25.8206	NaN	NaN	NaN	NaN	NaN			3	3	3	12.3	12.3	12.3	52.569	0	12.915	522650000	18	25.6337	25.5614	25.7059	NaN	8	4	4	0	0.418468	-0.14449	-0.868564	Q9Y5X2;C9J014;C9J271	Q9Y5X2	Sorting nexin-8	SNX8	3926	sp|Q9Y5X2|SNX8_HUMAN Sorting nexin-8 OS=Homo sapiens OX=9606 GN=SNX8 PE=1 SV=1
25.7179	25.7764	25.2679	NaN	26.4398	26.2141	26.1048	NaN	25.0556	26.395	26.0288	26.1569	26.1488	26.2221	NaN			7	4	4	47.9	33	33	23.658	0	31.764	690400000	31	25.9607	25.8005	25.9424	26.1391	12	4	4	4	0.72606	-0.141877	-0.367219	P20339;F8VWU4;F8WCY6;F8WD79;F8VPW9;F8VSF8;F8VWZ7	P20339	Ras-related protein Rab-5A	RAB5A	1895	sp|P20339|RAB5A_HUMAN Ras-related protein Rab-5A OS=Homo sapiens OX=9606 GN=RAB5A PE=1 SV=2
25.9731	25.7154	25.7457	25.8641	NaN	26.4855	25.7781	25.8284	NaN	25.7504	NaN	26.196	26.5239	26.2542	NaN			12	12	12	13.6	13.6	13.6	156.27	0	53.041	844200000	39	26.0105	25.8246	25.9606	26.3247	11	4	4	3	0.490637	-0.136047	-0.733978	Q86UP2;G3V4Y7;H0YJZ8;G3V5G2;G3V5P0;B7Z6P3;G8JLP4;Q9Y4F3	Q86UP2;G3V4Y7	Kinectin	KTN1	2985	sp|Q86UP2|KTN1_HUMAN Kinectin OS=Homo sapiens OX=9606 GN=KTN1 PE=1 SV=1;tr|G3V4Y7|G3V4Y7_HUMAN Kinectin OS=Homo sapiens OX=9606 GN=KTN1 PE=1 SV=1
25.6031	25.1421	25.1052	NaN	24.9892	24.6068	25.8738	25.2692	NaN	25.6159	NaN	NaN	NaN	NaN	NaN			6	6	6	28.3	28.3	28.3	34.18	0	31.636	446470000	13	25.2757	25.2099	25.3414	NaN	8	4	4	0	0.682158	-0.131543	-0.430076	Q12846;C9JFM5;A0A087WWW0;H3BMK2	Q12846;C9JFM5;A0A087WWW0	Syntaxin-4	STX4	2558	sp|Q12846|STX4_HUMAN Syntaxin-4 OS=Homo sapiens OX=9606 GN=STX4 PE=1 SV=2;tr|C9JFM5|C9JFM5_HUMAN Syntaxin-4 (Fragment) OS=Homo sapiens OX=9606 GN=STX4 PE=1 SV=1;tr|A0A087WWW0|A0A087WWW0_HUMAN Syntaxin-4 (Fragment) OS=Homo sapiens OX=9606 GN=STX4 PE=1 SV=1
25.7086	25.618	25.5711	25.7793	NaN	25.3818	NaN	25.5645	26.3913	25.8514	NaN	NaN	NaN	25.7225	NaN			4	4	4	18	18	18	22.348	0	7.1265	604910000	21	25.7321	25.6693	25.7973	25.7225	9	4	4	1	0.59037	-0.127999	-0.568425	Q9NY12	Q9NY12	H/ACA ribonucleoprotein complex subunit 1	GAR1	3693	sp|Q9NY12|GAR1_HUMAN H/ACA ribonucleoprotein complex subunit 1 OS=Homo sapiens OX=9606 GN=GAR1 PE=1 SV=1
25.9286	25.5403	25.4477	NaN	25.4576	NaN	25.6384	25.7379	25.7518	25.7437	NaN	25.191	25.2121	NaN	NaN			2	2	2	33.9	33.9	33.9	6.6767	0	12.307	562840000	19	25.5649	25.5936	25.7179	25.2016	10	4	4	2	0.327456	-0.124375	-1.06593	P62273;A0A087WTT6;A0A2R8Y851	P62273;A0A087WTT6;A0A2R8Y851	40S ribosomal protein S29	RPS29	2386	sp|P62273|RS29_HUMAN 40S ribosomal protein S29 OS=Homo sapiens OX=9606 GN=RPS29 PE=1 SV=2;tr|A0A087WTT6|A0A087WTT6_HUMAN 40S ribosomal protein S29 OS=Homo sapiens OX=9606 GN=RPS29 PE=1 SV=1;tr|A0A2R8Y851|A0A2R8Y851_HUMAN 40S ribosomal protein S29 OS=Homo s
25.919	25.7506	25.4362	24.2379	NaN	25.1871	26.0246	25.4622	NaN	25.1502	NaN	NaN	NaN	NaN	NaN			3	3	3	20.9	20.9	20.9	28.956	0	14.66	335160000	23	25.396	25.3359	25.456	NaN	8	4	4	0	0.789274	-0.120114	-0.279462	Q5QPM7;Q92530;Q5QPM9;H0Y555;F5H4Z3	Q5QPM7;Q92530;Q5QPM9	Proteasome inhibitor PI31 subunit	PSMF1	2835	tr|Q5QPM7|Q5QPM7_HUMAN Proteasome inhibitor PI31 subunit OS=Homo sapiens OX=9606 GN=PSMF1 PE=1 SV=2;sp|Q92530|PSMF1_HUMAN Proteasome inhibitor PI31 subunit OS=Homo sapiens OX=9606 GN=PSMF1 PE=1 SV=2;tr|Q5QPM9|Q5QPM9_HUMAN Proteasome inhibitor PI31 subunit
26.2533	NaN	26.1195	26.5575	26.4095	NaN	26.2671	26.1738	26.8668	26.5099	NaN	NaN	NaN	NaN	NaN			3	3	3	23.3	23.3	23.3	20.662	0	35.169	558300000	14	26.3947	26.3349	26.4544	NaN	8	4	4	0	0.534696	-0.119478	-0.65843	F8VQX6;H0YI09;Q9H8H3	F8VQX6;H0YI09;Q9H8H3	Methyltransferase-like protein 7A	METTL7A	972	tr|F8VQX6|F8VQX6_HUMAN Methyltransferase-like protein 7A (Fragment) OS=Homo sapiens OX=9606 GN=METTL7A PE=1 SV=1;tr|H0YI09|H0YI09_HUMAN Methyltransferase-like protein 7A (Fragment) OS=Homo sapiens OX=9606 GN=METTL7A PE=1 SV=1;sp|Q9H8H3|MET7A_HUMAN Methyltr
25.2541	NaN	24.9353	24.7645	24.7191	NaN	25.2172	25.1699	25.0232	24.6743	NaN	NaN	NaN	NaN	NaN			2	2	2	15.2	15.2	15.2	34.593	0.00028321	3.637	212760000	8	24.9697	24.9182	25.0211	NaN	8	4	4	0	0.572826	-0.102876	-0.596209	Q6PD74;H0YL49	Q6PD74;H0YL49	Alpha- and gamma-adaptin-binding protein p34	AAGAB	2913	sp|Q6PD74|AAGAB_HUMAN Alpha- and gamma-adaptin-binding protein p34 OS=Homo sapiens OX=9606 GN=AAGAB PE=1 SV=1;tr|H0YL49|H0YL49_HUMAN Alpha- and gamma-adaptin-binding protein p34 (Fragment) OS=Homo sapiens OX=9606 GN=AAGAB PE=1 SV=1
26.5912	26.6002	26.3509	NaN	25.6105	NaN	26.4312	26.6454	25.8768	26.5634	25.4706	NaN	NaN	27.006	NaN			9	9	9	51.7	51.7	51.7	23.643	0	71.477	1052600000	31	26.3146	26.2882	26.3792	26.2383	10	4	4	2	0.764673	-0.0909834	-0.313278	C9JNK6;O75431;C9JAZ1	C9JNK6;O75431;C9JAZ1	Metaxin-2	MTX2	625	tr|C9JNK6|C9JNK6_HUMAN Metaxin-2 OS=Homo sapiens OX=9606 GN=MTX2 PE=1 SV=1;sp|O75431|MTX2_HUMAN Metaxin-2 OS=Homo sapiens OX=9606 GN=MTX2 PE=1 SV=1;tr|C9JAZ1|C9JAZ1_HUMAN Metaxin-2 (Fragment) OS=Homo sapiens OX=9606 GN=MTX2 PE=1 SV=1
25.367	24.8126	24.7572	NaN	24.5394	NaN	25.3013	24.8872	24.8275	24.8161	NaN	NaN	NaN	NaN	NaN			2	1	1	26	13	13	11.345	0	7.7949	222590000	13	24.9135	24.869	24.958	NaN	8	4	4	0	0.687403	-0.0889812	-0.42247	H0YMV8;C9JLI6;Q71UM5	H0YMV8;C9JLI6;Q71UM5	40S ribosomal protein S27;40S ribosomal protein S27-like	RPS27L	617	tr|H0YMV8|H0YMV8_HUMAN 40S ribosomal protein S27 OS=Homo sapiens OX=9606 GN=RPS27L PE=1 SV=1;tr|C9JLI6|C9JLI6_HUMAN 40S ribosomal protein S27 OS=Homo sapiens OX=9606 GN=RPS27L PE=1 SV=1;sp|Q71UM5|RS27L_HUMAN 40S ribosomal protein S27-like OS=Homo sapiens O
25.5867	25.3158	25.3978	NaN	25.1882	NaN	25.5512	25.505	25.39	25.3617	25.2199	25.5492	25.4899	25.5737	NaN			3	3	3	10.9	10.9	10.9	41.531	0	76.378	634870000	26	25.4274	25.3721	25.452	25.4582	12	4	4	4	0.432882	-0.0798597	-0.840419	A0A087WU53;Q9H0U3	A0A087WU53;Q9H0U3	Magnesium transporter protein 1	MAGT1	25	tr|A0A087WU53|A0A087WU53_HUMAN Dolichyl-diphosphooligosaccharide--protein glycosyltransferase subunit MAGT1 OS=Homo sapiens OX=9606 GN=MAGT1 PE=1 SV=1;sp|Q9H0U3|MAGT1_HUMAN Magnesium transporter protein 1 OS=Homo sapiens OX=9606 GN=MAGT1 PE=1 SV=1
25.5387	25.33	25.3281	NaN	24.8286	NaN	25.4476	25.6065	25.0928	25.1678	NaN	NaN	NaN	NaN	NaN			8	8	8	18.7	18.7	18.7	71.639	0	37.487	414650000	17	25.2925	25.2563	25.3287	NaN	8	4	4	0	0.720504	-0.0723205	-0.375078	A0MZ66	A0MZ66	Shootin-1	KIAA1598	428	sp|A0MZ66|SHOT1_HUMAN Shootin-1 OS=Homo sapiens OX=9606 GN=SHTN1 PE=1 SV=4
26.3556	25.9382	26.2517	NaN	26.1439	26.0219	26.5211	26.0884	NaN	26.3468	NaN	NaN	NaN	NaN	NaN			8	8	8	31.1	31.1	31.1	34.746	0	64.809	771950000	28	26.2084	26.1723	26.2445	NaN	8	4	4	0	0.639095	-0.0721655	-0.49366	Q99747;J3KTJ6;J3QS28;J3QKW4	Q99747;J3KTJ6	Gamma-soluble NSF attachment protein	NAPG	3368	sp|Q99747|SNAG_HUMAN Gamma-soluble NSF attachment protein OS=Homo sapiens OX=9606 GN=NAPG PE=1 SV=1;tr|J3KTJ6|J3KTJ6_HUMAN Gamma-soluble NSF attachment protein (Fragment) OS=Homo sapiens OX=9606 GN=NAPG PE=1 SV=3
24.7494	24.7788	24.9807	24.4141	NaN	25.2263	25.1025	NaN	24.4768	24.3479	NaN	24.7343	24.6293	25.484	NaN			6	6	6	12.6	12.6	12.6	103.08	0	15.191	357710000	18	24.8113	24.7307	24.7884	24.9492	11	4	4	3	0.824938	-0.0576482	-0.23107	Q96HY7;H7C149;C9JWN1	Q96HY7	Probable 2-oxoglutarate dehydrogenase E1 component DHKTD1, mitochondrial	DHTKD1	3291	sp|Q96HY7|DHTK1_HUMAN Probable 2-oxoglutarate dehydrogenase E1 component DHKTD1, mitochondrial OS=Homo sapiens OX=9606 GN=DHTKD1 PE=1 SV=2
25.6066	25.4389	25.5933	NaN	25.887	26.2697	25.523	25.5412	NaN	25.3979	NaN	26.1971	26.3859	26.2283	NaN			4	4	4	23.3	23.3	23.3	22.326	0	14.533	588550000	40	25.8244	25.6315	25.6829	26.2704	11	4	4	3	0.821995	-0.0514822	-0.235038	Q14116	Q14116	Interleukin-18	IL18	2643	sp|Q14116|IL18_HUMAN Interleukin-18 OS=Homo sapiens OX=9606 GN=IL18 PE=1 SV=1
25.2193	26.2187	25.8113	NaN	25.6609	NaN	25.561	25.9186	25.7884	25.8369	NaN	NaN	NaN	NaN	NaN			5	5	5	9.7	9.7	9.7	87.972	0	15.748	504670000	17	25.7519	25.7276	25.7762	NaN	8	4	4	0	0.832324	-0.0486741	-0.22113	Q08AM6;A0A087WT26;H3BUU8;H3BQD9	Q08AM6	Protein VAC14 homolog	VAC14	2538	sp|Q08AM6|VAC14_HUMAN Protein VAC14 homolog OS=Homo sapiens OX=9606 GN=VAC14 PE=1 SV=1
26.5298	27.3281	25.4816	NaN	26.3242	NaN	26.0676	26.7791	26.2683	26.7376	NaN	NaN	NaN	NaN	NaN			4	4	4	10.6	10.6	10.6	53.42	0	19.894	727210000	22	26.4395	26.4159	26.4631	NaN	8	4	4	0	0.913736	-0.0472145	-0.112974	Q7Z4G4;K7ENP1;Q5JY01;Q5JY02;K7EPZ4;K7EJQ4	Q7Z4G4;K7ENP1;Q5JY01;Q5JY02	tRNA (guanine(10)-N2)-methyltransferase homolog	TRMT11	2964	sp|Q7Z4G4|TRM11_HUMAN tRNA (guanine(10)-N2)-methyltransferase homolog OS=Homo sapiens OX=9606 GN=TRMT11 PE=1 SV=1;tr|K7ENP1|K7ENP1_HUMAN tRNA (guanine(10)-N2)-methyltransferase homolog OS=Homo sapiens OX=9606 GN=TRMT11 PE=1 SV=1;tr|Q5JY01|Q5JY01_HUMAN tRNA
26.6089	26.3828	26.5672	NaN	25.7073	NaN	26.5028	26.1882	26.401	26.3616	NaN	NaN	NaN	NaN	NaN			4	4	4	25.6	25.6	25.6	32.477	0	20.822	963800000	21	26.34	26.3166	26.3634	NaN	8	4	4	0	0.837782	-0.0468183	-0.213801	Q9BSH4	Q9BSH4	Translational activator of cytochrome c oxidase 1	TACO1	3404	sp|Q9BSH4|TACO1_HUMAN Translational activator of cytochrome c oxidase 1 OS=Homo sapiens OX=9606 GN=TACO1 PE=1 SV=1
25.6687	25.5009	25.1033	25.7384	NaN	NaN	25.4401	25.754	25.529	25.4508	NaN	NaN	NaN	NaN	NaN			9	9	9	15.6	15.6	15.6	101.4	0	28.789	692250000	33	25.5232	25.5028	25.5435	NaN	8	4	4	0	0.807763	-0.0406322	-0.254289	O95049;K7ESC0	O95049	Tight junction protein ZO-3	TJP3	1550	sp|O95049|ZO3_HUMAN Tight junction protein ZO-3 OS=Homo sapiens OX=9606 GN=TJP3 PE=1 SV=3
25.2474	24.995	24.7748	NaN	24.5892	NaN	24.5256	24.7715	25.034	25.4126	NaN	NaN	NaN	NaN	NaN			6	6	6	10.8	10.8	10.8	89.437	0	14.398	412790000	19	24.9188	24.9016	24.9359	NaN	8	4	4	0	0.889663	-0.0343051	-0.14473	A0A0D9SEI3;A0A0D9SER5;A0A0D9SEN2;Q5QPR4;Q5QPR3;Q9UQ88;P21127	A0A0D9SEI3;A0A0D9SER5;A0A0D9SEN2;Q5QPR4;Q5QPR3;Q9UQ88;P21127	Cyclin-dependent kinase 11A;Cyclin-dependent kinase 11B	CDK11B;CDK11A	208	tr|A0A0D9SEI3|A0A0D9SEI3_HUMAN Cyclin-dependent kinase 11B OS=Homo sapiens OX=9606 GN=CDK11B PE=1 SV=1;tr|A0A0D9SER5|A0A0D9SER5_HUMAN Cyclin-dependent kinase 11B OS=Homo sapiens OX=9606 GN=CDK11B PE=1 SV=1;tr|A0A0D9SEN2|A0A0D9SEN2_HUMAN Cyclin-dependent ki
25.302	25.2964	25.379	25.4503	NaN	24.8164	25.5619	25.3215	NaN	25.8637	NaN	NaN	NaN	NaN	NaN			11	11	11	24.7	24.7	24.7	61.244	0	36.784	705610000	25	25.3739	25.3569	25.3909	NaN	8	4	4	0	0.884677	-0.0339375	-0.151327	P32189;Q14409;F8WC39;A6NP46;F8WDA9;F8WBI8;H7C2A0;F8WF44;Q14410	P32189;Q14409	Glycerol kinase;Putative glycerol kinase 3	GK;GK3P	2032	sp|P32189|GLPK_HUMAN Glycerol kinase OS=Homo sapiens OX=9606 GN=GK PE=1 SV=3;sp|Q14409|GLPK3_HUMAN Glycerol kinase 3 OS=Homo sapiens OX=9606 GN=GK3P PE=2 SV=2
25.119	25.0613	NaN	25.2135	25.5006	NaN	25.022	25.4334	25.1679	25.3257	NaN	NaN	NaN	NaN	NaN			7	7	7	9	9	9	134.28	0	19.441	470070000	19	25.2304	25.2236	25.2373	NaN	8	4	4	0	0.921282	-0.0136824	-0.103049	P00533;Q504U8;E9PFD7;C9JYS6;A0A1W2PRR9	P00533;Q504U8;E9PFD7	Epidermal growth factor receptor;Receptor protein-tyrosine kinase	EGFR	1623	sp|P00533|EGFR_HUMAN Epidermal growth factor receptor OS=Homo sapiens OX=9606 GN=EGFR PE=1 SV=2;tr|Q504U8|Q504U8_HUMAN Receptor protein-tyrosine kinase OS=Homo sapiens OX=9606 GN=EGFR PE=1 SV=1;tr|E9PFD7|E9PFD7_HUMAN Receptor protein-tyrosine kinase OS=Hom
NaN	27.0805	26.5651	27.1384	27.5413	NaN	26.9549	26.9283	27.4925	26.9882	27.7355	28.0364	27.9789	27.8856	NaN			3	3	3	37.6	37.6	37.6	9.5541	0	24.136	2328700000	64	27.3605	27.0813	27.091	27.9091	12	4	4	4	0.969351	-0.00966024	-0.0400526	F5GXX5;P61803;F5H895;A0A0B4J239	F5GXX5;P61803;F5H895;A0A0B4J239	Dolichyl-diphosphooligosaccharide--protein glycosyltransferase subunit DAD1	DAD1	926	tr|F5GXX5|F5GXX5_HUMAN Dolichyl-diphosphooligosaccharide--protein glycosyltransferase subunit DAD1 OS=Homo sapiens OX=9606 GN=DAD1 PE=1 SV=1;sp|P61803|DAD1_HUMAN Dolichyl-diphosphooligosaccharide--protein glycosyltransferase subunit DAD1 OS=Homo sapiens OX
25.3286	24.9299	25.2217	NaN	25.5393	NaN	25.2016	25.0858	25.515	25.1614	NaN	NaN	NaN	NaN	NaN			4	4	4	23	23	23	33.331	0	12.953	609290000	30	25.2479	25.2549	25.241	NaN	8	4	4	0	0.932751	0.0139127	0.087986	Q15526;A0A087WYS9	Q15526;A0A087WYS9	Surfeit locus protein 1	SURF1	2730	sp|Q15526|SURF1_HUMAN Surfeit locus protein 1 OS=Homo sapiens OX=9606 GN=SURF1 PE=1 SV=1;tr|A0A087WYS9|A0A087WYS9_HUMAN SURF1-like protein OS=Homo sapiens OX=9606 GN=SURF1 PE=1 SV=1
26.5786	27.0417	26.4843	NaN	26.7925	26.5186	26.8081	26.9035	NaN	26.6017	NaN	26.8866	26.3704	NaN	NaN			3	3	3	29.6	29.6	29.6	17.385	0	16.827	838210000	27	26.6986	26.7243	26.708	26.6285	10	4	4	2	0.918388	0.0163102	0.106854	H3BV16;O96000;H3BPJ9	H3BV16;O96000;H3BPJ9	NADH dehydrogenase [ubiquinone] 1 beta subcomplex subunit 10	NDUFB10	1133	tr|H3BV16|H3BV16_HUMAN Complex I-PDSW (Fragment) OS=Homo sapiens OX=9606 GN=NDUFB10 PE=1 SV=8;sp|O96000|NDUBA_HUMAN NADH dehydrogenase [ubiquinone] 1 beta subcomplex subunit 10 OS=Homo sapiens OX=9606 GN=NDUFB10 PE=1 SV=3;tr|H3BPJ9|H3BPJ9_HUMAN Complex I-P
26.0303	25.2282	25.5432	NaN	24.3033	NaN	25.2888	25.04	25.3936	25.3166	NaN	NaN	NaN	NaN	NaN			5	5	5	19.7	19.7	19.7	40.029	0	33.368	354590000	21	25.268	25.2763	25.2598	NaN	8	4	4	0	0.966063	0.0164909	0.0443525	P78310	P78310	Coxsackievirus and adenovirus receptor	CXADR	2442	sp|P78310|CXAR_HUMAN Coxsackievirus and adenovirus receptor OS=Homo sapiens OX=9606 GN=CXADR PE=1 SV=1
25.9089	NaN	25.898	26.0511	26.8557	NaN	26.2685	26.2059	26.4511	25.7141	NaN	NaN	NaN	NaN	NaN			6	6	6	20.4	20.4	20.4	49.237	0	19.503	680860000	20	26.1691	26.1784	26.1599	NaN	8	4	4	0	0.948854	0.0185533	0.0668754	Q7L592;C9J236;C9JS27;C9JEL7;C9JP36;H7C3N5	Q7L592;C9J236;C9JS27	NADH dehydrogenase [ubiquinone] complex I, assembly factor 7	NDUFAF7	2949	sp|Q7L592|NDUF7_HUMAN Protein arginine methyltransferase NDUFAF7, mitochondrial OS=Homo sapiens OX=9606 GN=NDUFAF7 PE=1 SV=1;tr|C9J236|C9J236_HUMAN Protein arginine methyltransferase NDUFAF7 (Fragment) OS=Homo sapiens OX=9606 GN=NDUFAF7 PE=1 SV=1;tr|C9JS27
25.2398	25.402	25.2615	NaN	25.0926	NaN	25.3785	25.1952	25.2071	25.1337	NaN	NaN	NaN	NaN	NaN			2	2	2	10.6	10.6	10.6	33.881	0	11.714	286170000	16	25.2388	25.249	25.2286	NaN	8	4	4	0	0.812764	0.0203581	0.247513	Q9NXA8	Q9NXA8	NAD-dependent protein deacylase sirtuin-5, mitochondrial	SIRT5	3686	sp|Q9NXA8|SIR5_HUMAN NAD-dependent protein deacylase sirtuin-5, mitochondrial OS=Homo sapiens OX=9606 GN=SIRT5 PE=1 SV=2
NaN	24.8927	24.976	24.5706	24.797	NaN	24.9477	25.1602	24.3242	24.6848	NaN	NaN	NaN	NaN	NaN			2	2	2	8.6	8.6	8.6	40.241	0	5.4318	241240000	12	24.7942	24.8091	24.7792	NaN	8	4	4	0	0.886437	0.0298424	0.148998	Q14320;B0S8I6;Q9Y247	Q14320;B0S8I6;Q9Y247	Protein FAM50A;Protein FAM50B	FAM50A;FAM50B	2661	sp|Q14320|FA50A_HUMAN Protein FAM50A OS=Homo sapiens OX=9606 GN=FAM50A PE=1 SV=2;tr|B0S8I6|B0S8I6_HUMAN Protein FAM50A (Fragment) OS=Homo sapiens OX=9606 GN=FAM50A PE=1 SV=1;sp|Q9Y247|FA50B_HUMAN Protein FAM50B OS=Homo sapiens OX=9606 GN=FAM50B PE=1 SV=1
24.8074	25.4031	25.2563	25.4264	NaN	NaN	25.0908	25.2593	25.487	24.9184	NaN	NaN	NaN	NaN	NaN			4	4	4	24.6	24.6	24.6	25.072	0	12.757	374980000	17	25.2061	25.2233	25.1889	NaN	8	4	4	0	0.860909	0.0343871	0.182888	Q5TDF0;Q9BSD7	Q5TDF0;Q9BSD7	Cancer-related nucleoside-triphosphatase	NTPCR	2864	tr|Q5TDF0|Q5TDF0_HUMAN Cancer-related nucleoside-triphosphatase OS=Homo sapiens OX=9606 GN=NTPCR PE=1 SV=1;sp|Q9BSD7|NTPCR_HUMAN Cancer-related nucleoside-triphosphatase OS=Homo sapiens OX=9606 GN=NTPCR PE=1 SV=1
25.3592	25.2978	25.4805	NaN	25.7452	NaN	25.2732	25.245	25.7176	25.5075	NaN	NaN	25.2911	NaN	NaN			5	5	5	15	15	15	65.853	0	25.434	519170000	22	25.4352	25.4707	25.4358	25.2911	9	4	4	1	0.822396	0.0348616	0.234498	Q86X55;K7EK20;K7EPK1;K7EQA8;K7EQB9	Q86X55	Histone-arginine methyltransferase CARM1	CARM1	2998	sp|Q86X55|CARM1_HUMAN Histone-arginine methyltransferase CARM1 OS=Homo sapiens OX=9606 GN=CARM1 PE=1 SV=3
25.6164	25.2956	25.4068	NaN	25.2443	25.462	25.9691	25.2373	NaN	24.7548	NaN	NaN	25.8796	NaN	NaN			5	5	3	31.2	31.2	13.4	21.539	0	13.614	527920000	19	25.4296	25.3908	25.3558	25.8796	9	4	4	1	0.899385	0.034987	0.131887	Q9NVJ2	Q9NVJ2	ADP-ribosylation factor-like protein 8B	ARL8B	3664	sp|Q9NVJ2|ARL8B_HUMAN ADP-ribosylation factor-like protein 8B OS=Homo sapiens OX=9606 GN=ARL8B PE=1 SV=1
27.0356	27.3275	26.2095	NaN	28.0406	NaN	27.1508	27.0727	27.3786	26.8323	NaN	26.6317	25.9634	NaN	NaN			2	2	2	26.3	26.3	26.3	10.5	0	28.842	1008400000	22	26.9643	27.1533	27.1086	26.2976	10	4	4	2	0.913647	0.0446968	0.113091	Q9Y5L4	Q9Y5L4	Mitochondrial import inner membrane translocase subunit Tim13	TIMM13	3919	sp|Q9Y5L4|TIM13_HUMAN Mitochondrial import inner membrane translocase subunit Tim13 OS=Homo sapiens OX=9606 GN=TIMM13 PE=1 SV=1
25.0655	25.2112	25.0535	NaN	24.8864	24.9935	24.651	24.9325	25.3721	NaN	NaN	24.6337	24.6822	25.1185	NaN			8	8	8	8	8	8	164.67	0	35.243	417000000	23	24.9637	25.0542	24.9873	24.8115	11	4	4	3	0.695177	0.0668554	0.411247	Q9NTI5;A9IYQ1	Q9NTI5	Sister chromatid cohesion protein PDS5 homolog B	PDS5B	3647	sp|Q9NTI5|PDS5B_HUMAN Sister chromatid cohesion protein PDS5 homolog B OS=Homo sapiens OX=9606 GN=PDS5B PE=1 SV=1
26.6308	25.675	26.138	NaN	25.8317	NaN	26.3307	25.6945	26.0446	25.9186	NaN	NaN	NaN	NaN	NaN			5	5	5	9.8	9.8	9.8	81.627	0	13.54	621510000	18	26.033	26.0689	25.9971	NaN	8	4	4	0	0.782739	0.0717745	0.288407	Q9H307	Q9H307	Pinin	PNN	3513	sp|Q9H307|PININ_HUMAN Pinin OS=Homo sapiens OX=9606 GN=PNN PE=1 SV=5
25.4265	24.5472	NaN	25.1603	24.7652	24.9232	24.8569	24.5228	NaN	25.3008	NaN	NaN	24.8604	NaN	NaN			5	5	5	8.9	8.9	8.9	91.838	0	19.883	418790000	13	24.9293	24.9748	24.9009	24.8604	9	4	4	1	0.780448	0.0738821	0.291549	Q09161	Q09161	Nuclear cap-binding protein subunit 1	NCBP1	2541	sp|Q09161|NCBP1_HUMAN Nuclear cap-binding protein subunit 1 OS=Homo sapiens OX=9606 GN=NCBP1 PE=1 SV=1
26.1181	25.8795	25.7401	NaN	25.0069	NaN	26.2676	26.0921	24.8446	25.2235	NaN	NaN	NaN	NaN	NaN			8	8	8	28.5	28.5	28.5	41.489	0	45.317	743430000	37	25.6466	25.6862	25.607	NaN	8	4	4	0	0.855696	0.0791922	0.189838	Q99961;M0QYE0;M0R0I3;Q99962	Q99961;M0QYE0;M0R0I3	Endophilin-A2	SH3GL1	3379	sp|Q99961|SH3G1_HUMAN Endophilin-A2 OS=Homo sapiens OX=9606 GN=SH3GL1 PE=1 SV=1;tr|M0QYE0|M0QYE0_HUMAN Endophilin-A2 (Fragment) OS=Homo sapiens OX=9606 GN=SH3GL1 PE=1 SV=8;tr|M0R0I3|M0R0I3_HUMAN Endophilin-A2 (Fragment) OS=Homo sapiens OX=9606 GN=SH3GL1 PE
24.7687	25.0449	25.2496	NaN	24.9044	NaN	24.8521	25.0076	24.851	24.8187	NaN	NaN	NaN	NaN	NaN			3	3	2	10	10	7.3	59.709	0	23.545	313280000	19	24.9371	24.9919	24.8824	NaN	8	4	4	0	0.362619	0.109536	0.985095	Q9NPQ8;E9PI04;E9PLE5;E9PSI0	Q9NPQ8;E9PI04	Synembryn-A	RIC8A	3608	sp|Q9NPQ8|RIC8A_HUMAN Synembryn-A OS=Homo sapiens OX=9606 GN=RIC8A PE=1 SV=3;tr|E9PI04|E9PI04_HUMAN Synembryn-A (Fragment) OS=Homo sapiens OX=9606 GN=RIC8A PE=1 SV=1
25.9164	25.4365	25.071	NaN	25.3974	NaN	25.7839	25.7349	24.9018	24.9323	NaN	NaN	NaN	NaN	NaN			5	5	5	11.1	11.1	11.1	69.997	0	44.084	395100000	22	25.3968	25.4553	25.3382	NaN	8	4	4	0	0.709197	0.117084	0.391153	Q9Y2W2;F5H5G4	Q9Y2W2	WW domain-binding protein 11	WBP11	3872	sp|Q9Y2W2|WBP11_HUMAN WW domain-binding protein 11 OS=Homo sapiens OX=9606 GN=WBP11 PE=1 SV=1
25.1459	25.1397	25.445	NaN	25.6374	NaN	25.5956	25.145	25.3016	24.8482	NaN	NaN	NaN	NaN	NaN			5	5	5	31.9	31.9	31.9	31.62	0	23.697	317080000	19	25.2823	25.342	25.2226	NaN	8	4	4	0	0.567869	0.119411	0.60415	O00165;E9PIQ7;Q5VYD6	O00165	HCLS1-associated protein X-1	HAX1	1289	sp|O00165|HAX1_HUMAN HCLS1-associated protein X-1 OS=Homo sapiens OX=9606 GN=HAX1 PE=1 SV=2
26.6836	26.4397	26.2066	NaN	26.1407	NaN	26.6557	26.1205	26.086	26.1192	NaN	NaN	NaN	NaN	NaN			6	6	6	16.8	16.8	16.8	66.175	0	17.411	760640000	16	26.3065	26.3677	26.2453	NaN	8	4	4	0	0.531664	0.122304	0.663495	S4R3V8;Q86X29	S4R3V8;Q86X29	Lipolysis-stimulated lipoprotein receptor	LSR	2997	tr|S4R3V8|S4R3V8_HUMAN Lipolysis-stimulated lipoprotein receptor OS=Homo sapiens OX=9606 GN=LSR PE=1 SV=2;sp|Q86X29|LSR_HUMAN Lipolysis-stimulated lipoprotein receptor OS=Homo sapiens OX=9606 GN=LSR PE=1 SV=4
24.9462	25.418	24.7644	NaN	25.1889	NaN	25.0261	25.3045	24.8818	24.6052	NaN	NaN	NaN	NaN	NaN			4	4	4	13.8	13.8	13.8	50.714	0	37.247	338180000	29	25.0169	25.0794	24.9544	NaN	8	4	4	0	0.562223	0.124984	0.613248	O43159;E9PPY3;E9PPP6	O43159;E9PPY3	Ribosomal RNA-processing protein 8	RRP8	1390	sp|O43159|RRP8_HUMAN Ribosomal RNA-processing protein 8 OS=Homo sapiens OX=9606 GN=RRP8 PE=1 SV=2;tr|E9PPY3|E9PPY3_HUMAN Ribosomal RNA-processing protein 8 OS=Homo sapiens OX=9606 GN=RRP8 PE=1 SV=1
26.6498	25.9153	26.687	NaN	27.1993	26.9078	26.3296	26.4228	NaN	26.2753	27.2201	26.3826	26.7208	26.3405	NaN			4	4	4	18.9	18.9	18.9	28.305	0	53.826	771470000	27	26.5876	26.6129	26.4839	26.666	12	4	4	4	0.683398	0.128961	0.428276	C9JVE2;Q96GG9;C9JRU6;C9J0B2;C9J8R4	C9JVE2;Q96GG9;C9JRU6;C9J0B2;C9J8R4	DCN1-like protein;DCN1-like protein 1	DCUN1D1	634	tr|C9JVE2|C9JVE2_HUMAN DCN1-like protein OS=Homo sapiens OX=9606 GN=DCUN1D1 PE=1 SV=1;sp|Q96GG9|DCNL1_HUMAN DCN1-like protein 1 OS=Homo sapiens OX=9606 GN=DCUN1D1 PE=1 SV=1;tr|C9JRU6|C9JRU6_HUMAN DCN1-like protein (Fragment) OS=Homo sapiens OX=9606 GN=DCUN
25.8889	25.1159	NaN	25.3835	25.5232	25.3828	25.692	25.3382	NaN	24.9672	25.8319	25.7838	25.8983	25.5722	NaN			6	6	6	20.9	20.9	20.9	41.265	0	25.062	706850000	25	25.5315	25.4779	25.3451	25.7716	12	4	4	4	0.566466	0.1328	0.606405	F5H669;Q8N684;F5H6M0;F5H047;J3QT54;C9J286;C9J323;C9JM38	F5H669;Q8N684;F5H6M0;F5H047;J3QT54	Cleavage and polyadenylation specificity factor subunit 7	CPSF7	950	tr|F5H669|F5H669_HUMAN Cleavage and polyadenylation-specificity factor subunit 7 (Fragment) OS=Homo sapiens OX=9606 GN=CPSF7 PE=1 SV=1;sp|Q8N684|CPSF7_HUMAN Cleavage and polyadenylation specificity factor subunit 7 OS=Homo sapiens OX=9606 GN=CPSF7 PE=1 SV=
25.354	24.2348	24.0568	NaN	24.1886	NaN	24.9445	24.4576	23.8043	24.0424	NaN	NaN	NaN	NaN	NaN			6	6	6	18.5	18.5	18.5	46.898	0	23.5	184170000	12	24.3854	24.4585	24.3122	NaN	8	4	4	0	0.7213	0.146341	0.373949	Q9NY27;C9IZ04;F8WDK3;C9IZF4;F8WCA1;H7C559	Q9NY27;C9IZ04	Serine/threonine-protein phosphatase 4 regulatory subunit 2	PPP4R2	3694	sp|Q9NY27|PP4R2_HUMAN Serine/threonine-protein phosphatase 4 regulatory subunit 2 OS=Homo sapiens OX=9606 GN=PPP4R2 PE=1 SV=3;tr|C9IZ04|C9IZ04_HUMAN Serine/threonine-protein phosphatase 4 regulatory subunit 2 (Fragment) OS=Homo sapiens OX=9606 GN=PPP4R2 PE
28.0051	NaN	27.3791	26.85	27.9238	26.2201	27.9477	27.388	NaN	27.978	26.9559	27.4175	NaN	NaN	NaN			3	3	3	23.8	23.8	23.8	12.254	0	26.786	1995000000	32	27.4065	27.5395	27.3835	27.1867	10	4	4	2	0.761342	0.156028	0.317889	Q9Y3U8;J3KTD3;J3QSB5	Q9Y3U8	60S ribosomal protein L36	RPL36	3899	sp|Q9Y3U8|RL36_HUMAN 60S ribosomal protein L36 OS=Homo sapiens OX=9606 GN=RPL36 PE=1 SV=3
25.7866	26.3024	25.7561	NaN	25.536	NaN	25.5451	25.8745	25.8881	25.4375	NaN	NaN	NaN	NaN	NaN			13	6	6	15.6	7.9	7.9	137.92	0	21.065	542800000	24	25.7658	25.8453	25.6863	NaN	8	4	4	0	0.454268	0.158975	0.799893	P23634;Q16720;A0A2U3U055;A0A2U3TZI3;A0A2R8Y535	P23634	Plasma membrane calcium-transporting ATPase 4	ATP2B4	1937	sp|P23634|AT2B4_HUMAN Plasma membrane calcium-transporting ATPase 4 OS=Homo sapiens OX=9606 GN=ATP2B4 PE=1 SV=2
26.0319	25.8019	25.7746	NaN	25.9355	24.9964	25.9472	25.9116	NaN	25.9435	NaN	NaN	NaN	25.16	NaN			6	6	5	33.7	33.7	29.7	19.825	0	22.424	731400000	19	25.7225	25.886	25.6997	25.16	9	4	4	1	0.47079	0.186308	0.76951	A0A087X0R6;Q9UMY4	A0A087X0R6;Q9UMY4	Sorting nexin-12	SNX12	89	tr|A0A087X0R6|A0A087X0R6_HUMAN Sorting nexin-12 OS=Homo sapiens OX=9606 GN=SNX12 PE=1 SV=1;sp|Q9UMY4|SNX12_HUMAN Sorting nexin-12 OS=Homo sapiens OX=9606 GN=SNX12 PE=1 SV=4
26.2112	26.351	25.8709	NaN	26.3123	NaN	25.9777	25.9481	25.66	26.3694	NaN	NaN	NaN	NaN	NaN			8	8	8	11.7	11.7	11.7	115.96	0	28.699	855590000	23	26.0876	26.1863	25.9888	NaN	8	4	4	0	0.319598	0.197547	1.08496	Q96P70	Q96P70	Importin-9	IPO9	3316	sp|Q96P70|IPO9_HUMAN Importin-9 OS=Homo sapiens OX=9606 GN=IPO9 PE=1 SV=3
25.3533	24.973	26.2667	NaN	25.699	NaN	25.2373	25.343	25.485	25.3405	NaN	NaN	NaN	NaN	NaN			7	7	7	16.2	16.2	16.2	79.663	0	22.679	420350000	17	25.4622	25.573	25.3514	NaN	8	4	4	0	0.45788	0.221576	0.793184	Q9UKG1;C9JAB0;C9K0C4	Q9UKG1	DCC-interacting protein 13-alpha	APPL1	3797	sp|Q9UKG1|DP13A_HUMAN DCC-interacting protein 13-alpha OS=Homo sapiens OX=9606 GN=APPL1 PE=1 SV=1
26.0235	26.3821	25.4934	NaN	25.3213	NaN	25.677	25.8706	25.1212	25.6549	NaN	25.4421	NaN	24.6213	NaN			5	5	5	13	13	13	83.629	0	31.665	520360000	21	25.5607	25.8051	25.5809	25.0317	10	4	4	2	0.47157	0.224144	0.768094	Q14137	Q14137	Ribosome biogenesis protein BOP1	BOP1	2645	sp|Q14137|BOP1_HUMAN Ribosome biogenesis protein BOP1 OS=Homo sapiens OX=9606 GN=BOP1 PE=1 SV=2
25.8953	25.8452	25.6254	NaN	26.211	NaN	25.7781	25.8706	25.4761	25.5539	NaN	NaN	NaN	NaN	NaN			4	4	4	34.1	34.1	34.1	14.582	0	28.509	496090000	24	25.7819	25.8942	25.6697	NaN	8	4	4	0	0.190594	0.224557	1.47525	O15212;A2AB88	O15212;A2AB88	Prefoldin subunit 6	PFDN6	1370	sp|O15212|PFD6_HUMAN Prefoldin subunit 6 OS=Homo sapiens OX=9606 GN=PFDN6 PE=1 SV=1;tr|A2AB88|A2AB88_HUMAN Prefoldin subunit 6 OS=Homo sapiens OX=9606 GN=PFDN6 PE=1 SV=1
26.167	26.8011	25.5317	25.9651	NaN	NaN	25.4275	26.2009	25.2213	26.6937	NaN	NaN	NaN	NaN	NaN			5	5	5	12	12	12	68.119	0	19.985	671700000	23	26.001	26.1162	25.8858	NaN	8	4	4	0	0.612971	0.230401	0.533334	Q8TAT6;A0A0D9SFI9;I3L4U9	Q8TAT6	Nuclear protein localization protein 4 homolog	NPLOC4	3111	sp|Q8TAT6|NPL4_HUMAN Nuclear protein localization protein 4 homolog OS=Homo sapiens OX=9606 GN=NPLOC4 PE=1 SV=3
25.2866	25.2845	25.7623	26.0194	NaN	25.6597	NaN	25.2387	25.2666	25.2528	25.8698	26.2952	26.0127	25.7729	NaN			5	5	5	11.1	11.1	11.1	84.141	0	70.302	538870000	30	25.6434	25.5882	25.3544	25.9877	12	4	4	4	0.306096	0.233762	1.11857	O14672;H0YNC5	O14672	Disintegrin and metalloproteinase domain-containing protein 10	ADAM10	1335	sp|O14672|ADA10_HUMAN Disintegrin and metalloproteinase domain-containing protein 10 OS=Homo sapiens OX=9606 GN=ADAM10 PE=1 SV=1
26.0442	26.2785	27.2273	NaN	25.8234	NaN	26.2591	25.3234	25.9274	26.8873	NaN	25.4812	24.6792	NaN	NaN			7	7	7	22.7	22.7	22.7	35.761	0	29.737	916420000	27	25.9931	26.3433	26.0993	25.0802	10	4	4	2	0.606686	0.244028	0.543017	F5H345;A0A3B3IRR1;A0A3F2YNY7;P08397;F5GY90;F5H0P4;A0A3B3IU56;A0A1W2PNU5;F5H226;A0A3B3IU34;F5H4W5;F5H4X2	F5H345;A0A3B3IRR1;A0A3F2YNY7;P08397;F5GY90;F5H0P4;A0A3B3IU56;A0A1W2PNU5;F5H226;A0A3B3IU34	Porphobilinogen deaminase	HMBS	350	tr|F5H345|F5H345_HUMAN Hydroxymethylbilane synthase OS=Homo sapiens OX=9606 GN=HMBS PE=1 SV=1;tr|A0A3B3IRR1|A0A3B3IRR1_HUMAN Hydroxymethylbilane synthase OS=Homo sapiens OX=9606 GN=HMBS PE=1 SV=1;tr|A0A3F2YNY7|A0A3F2YNY7_HUMAN Hydroxymethylbilane synthase
25.5416	25.2173	25.7276	NaN	25.7202	NaN	25.5515	25.3724	24.7797	25.4538	NaN	NaN	NaN	NaN	NaN			2	2	2	20.6	20.6	20.6	18.681	0	42.334	389070000	18	25.4205	25.5517	25.2893	NaN	8	4	4	0	0.259839	0.262375	1.24416	Q9H773	Q9H773	dCTP pyrophosphatase 1	DCTPP1	3542	sp|Q9H773|DCTP1_HUMAN dCTP pyrophosphatase 1 OS=Homo sapiens OX=9606 GN=DCTPP1 PE=1 SV=1
26.2441	26.0447	25.8856	NaN	26.5806	NaN	25.1135	26.5512	25.8526	26.1096	NaN	NaN	NaN	NaN	NaN			8	8	8	41.7	41.7	41.7	21.921	0	30.921	1009800000	21	26.0477	26.1887	25.9067	NaN	8	4	4	0	0.433998	0.281987	0.838268	G3V2S6;Q9Y5K8;H0YJH8;G3V2V6;H0YJS0;G3V559;H0YJ55	G3V2S6;Q9Y5K8;H0YJH8;G3V2V6	V-type proton ATPase subunit D	ATP6V1D	1027	tr|G3V2S6|G3V2S6_HUMAN V-type proton ATPase subunit D OS=Homo sapiens OX=9606 GN=ATP6V1D PE=1 SV=1;sp|Q9Y5K8|VATD_HUMAN V-type proton ATPase subunit D OS=Homo sapiens OX=9606 GN=ATP6V1D PE=1 SV=1;tr|H0YJH8|H0YJH8_HUMAN V-type proton ATPase subunit D (Fragm
24.5982	24.9144	24.6822	25.1967	NaN	24.4478	24.6591	24.7241	NaN	24.2619	NaN	25.0221	24.7515	25.0727	NaN			6	6	6	13	13	13	67.518	0	13.45	399790000	20	24.7573	24.8479	24.5232	24.9488	11	4	4	3	0.10548	0.324658	1.9047	A0A0G2JJD3;O95870;A0A0G2JI89;F2Z3H2	A0A0G2JJD3;O95870;A0A0G2JI89	Abhydrolase domain-containing protein 16A	ABHD16A	226	tr|A0A0G2JJD3|A0A0G2JJD3_HUMAN Alpha/beta hydrolase domain-containing protein 16A OS=Homo sapiens OX=9606 GN=ABHD16A PE=1 SV=1;sp|O95870|ABHGA_HUMAN Phosphatidylserine lipase ABHD16A OS=Homo sapiens OX=9606 GN=ABHD16A PE=1 SV=3;tr|A0A0G2JI89|A0A0G2JI89_HUM
26.0938	26.5738	NaN	26.2238	26.4799	25.2316	25.9704	NaN	26.2334	26.3375	NaN	NaN	NaN	NaN	NaN			6	6	6	8.8	8.8	8.8	138.6	0	45.582	673090000	15	26.143	26.3428	25.9432	NaN	8	4	4	0	0.193815	0.399558	1.46292	O15357;A0A0A0MTP6;F5H588	O15357;A0A0A0MTP6	Phosphatidylinositol 3,4,5-trisphosphate 5-phosphatase 2	INPPL1	1380	sp|O15357|SHIP2_HUMAN Phosphatidylinositol 3,4,5-trisphosphate 5-phosphatase 2 OS=Homo sapiens OX=9606 GN=INPPL1 PE=1 SV=2;tr|A0A0A0MTP6|A0A0A0MTP6_HUMAN Phosphatidylinositol 3,4,5-trisphosphate 5-phosphatase 2 OS=Homo sapiens OX=9606 GN=INPPL1 PE=1 SV=1
26.1233	26.909	25.3088	NaN	26.26	NaN	25.6025	25.2803	26.4054	25.449	NaN	NaN	NaN	NaN	NaN			6	6	6	16.1	16.1	16.1	66.436	0	21.02	739170000	21	25.9173	26.1503	25.6843	NaN	8	4	4	0	0.301738	0.465979	1.12969	Q7Z3D6;H0YB62;H0YB09;H0YB11;A0A0C4DGD4	Q7Z3D6;H0YB62;H0YB09	UPF0317 protein C14orf159, mitochondrial	C14orf159	2960	sp|Q7Z3D6|GLUCM_HUMAN D-glutamate cyclase, mitochondrial OS=Homo sapiens OX=9606 GN=DGLUCY PE=1 SV=2;tr|H0YB62|H0YB62_HUMAN D-glutamate cyclase, mitochondrial (Fragment) OS=Homo sapiens OX=9606 GN=DGLUCY PE=1 SV=1;tr|H0YB09|H0YB09_HUMAN D-glutamate cyclase
25.4031	25.9448	25.9704	25.6624	NaN	24.5489	25.7068	25.3326	NaN	25.5186	NaN	24.7562	24.0959	23.6146	NaN			9	9	9	21.3	21.3	21.3	63.277	0	130.51	881290000	35	25.1413	25.7452	25.2767	24.1556	11	4	4	3	0.154167	0.468449	1.63026	Q9NVH1;B1AK20;Q5TH61	Q9NVH1;B1AK20	DnaJ homolog subfamily C member 11	DNAJC11	3661	sp|Q9NVH1|DJC11_HUMAN DnaJ homolog subfamily C member 11 OS=Homo sapiens OX=9606 GN=DNAJC11 PE=1 SV=2;tr|B1AK20|B1AK20_HUMAN DnaJ homolog subfamily C member 11 (Fragment) OS=Homo sapiens OX=9606 GN=DNAJC11 PE=1 SV=1
25.5707	25.85	NaN	25.1133	26.0731	NaN	25.0466	25.396	25.4601	24.7724	NaN	NaN	NaN	NaN	NaN			16	5	5	32.3	14.3	14.3	75.491	0	27.853	412230000	20	25.4103	25.6518	25.1688	NaN	8	4	4	0	0.114478	0.483018	1.84565	P42166	P42166	Lamina-associated polypeptide 2, isoform alpha;Thymopoietin;Thymopentin	TMPO	2122	sp|P42166|LAP2A_HUMAN Lamina-associated polypeptide 2, isoform alpha OS=Homo sapiens OX=9606 GN=TMPO PE=1 SV=2
24.9336	25.0343	NaN	25.4816	24.3513	23.6478	24.8826	24.7568	NaN	24.5802	NaN	NaN	NaN	NaN	NaN			8	8	8	14.1	14.1	14.1	83.27	0	42.032	242930000	33	24.7085	24.9502	24.4669	NaN	8	4	4	0	0.232385	0.483347	1.32824	A0A5F9ZA98;O75027;A0A2R8Y473;A0A590UJS8;B4DGL8;A0A087WW65;E9PJR8;A0A2R8YF35;E9PNQ5;A0A2R8Y3N2	A0A5F9ZA98;O75027;A0A2R8Y473;A0A590UJS8;B4DGL8;A0A087WW65	ATP-binding cassette sub-family B member 7, mitochondrial	ABCB7	401	tr|A0A5F9ZA98|A0A5F9ZA98_HUMAN ATP-binding cassette sub-family B member 7, mitochondrial OS=Homo sapiens OX=9606 GN=ABCB7 PE=1 SV=1;sp|O75027|ABCB7_HUMAN ATP-binding cassette sub-family B member 7, mitochondrial OS=Homo sapiens OX=9606 GN=ABCB7 PE=1 SV=2;t
25.9477	26.0507	NaN	25.9036	26.8484	25.112	25.8285	25.472	NaN	25.7743	26.2096	26.9765	26.1467	26.7347	NaN			4	4	4	26.5	26.5	26.5	18.383	0	18.73	865740000	23	26.0837	26.1876	25.5467	26.5169	12	4	4	4	0.0598163	0.640913	2.3155	Q99757;M0QXH0;F8WDN2	Q99757;M0QXH0	Thioredoxin, mitochondrial	TXN2	3369	sp|Q99757|THIOM_HUMAN Thioredoxin, mitochondrial OS=Homo sapiens OX=9606 GN=TXN2 PE=1 SV=2;tr|M0QXH0|M0QXH0_HUMAN Thioredoxin, mitochondrial OS=Homo sapiens OX=9606 GN=TXN2 PE=1 SV=1
24.6931	24.217	24.4447	NaN	24.0099	24.1889	22.9158	24.0722	NaN	23.5683	NaN	NaN	NaN	NaN	NaN			2	2	2	13.4	13.4	13.4	27.03	0	8.7469	156740000	17	24.0137	24.3412	23.6863	NaN	8	4	4	0	0.0906441	0.654924	2.01405	Q86YN1	Q86YN1	Dolichyldiphosphatase 1	DOLPP1	3002	sp|Q86YN1|DOPP1_HUMAN Dolichyldiphosphatase 1 OS=Homo sapiens OX=9606 GN=DOLPP1 PE=2 SV=1
25.2995	26.0359	25.7528	NaN	25.51	NaN	25.1659	25.5416	24.3252	24.9064	NaN	NaN	25.7326	NaN	NaN			2	2	2	11.4	11.4	11.4	24.927	0	19.825	398750000	20	25.3633	25.6496	24.9848	25.7326	9	4	4	1	0.0691516	0.664787	2.20991	Q96AT9;F8WBT4;C9J6A7;C9J9T0;C9IZU8;Q2QD12	Q96AT9;F8WBT4;C9J6A7;C9J9T0;C9IZU8;Q2QD12	Ribulose-phosphate 3-epimerase;Ribulose-phosphate 3-epimerase-like protein 1	RPE;RPEL1	3233	sp|Q96AT9|RPE_HUMAN Ribulose-phosphate 3-epimerase OS=Homo sapiens OX=9606 GN=RPE PE=1 SV=1;tr|F8WBT4|F8WBT4_HUMAN Ribulose-phosphate 3-epimerase OS=Homo sapiens OX=9606 GN=RPE PE=1 SV=1;tr|C9J6A7|C9J6A7_HUMAN Ribulose-phosphate 3-epimerase (Fragment) OS=H
31.7072	31.9973	NaN	33.0463	31.6224	30.3409	NaN	31.5266	30.8826	31.626	NaN	31.2127	NaN	30.7438	NaN			8	1	1	77.2	11.4	11.4	13.519	0	35.336	17356000000	54	31.4706	32.0933	31.094	30.9783	10	4	4	2	0.065582	0.999312	2.24844	H7BZJ3	H7BZJ3		PDIA3	1149	tr|H7BZJ3|H7BZJ3_HUMAN Protein disulfide-isomerase A3 (Fragment) OS=Homo sapiens OX=9606 GN=PDIA3 PE=1 SV=1
25.0674	24.8579	24.6361	NaN	NaN	25.1467	25.2401	NaN	25.2229	25.2267	NaN	NaN	NaN	NaN	NaN	+	3NT_Control	6	6	6	15.2	15.2	15.2	76.096	0	45.248	438970000	22	25.0568	24.8538	25.2091	NaN	7	3	4	0	0.0210947	-0.355322	-3.31626	O96005;K7EQQ1	O96005	Cleft lip and palate transmembrane protein 1	CLPTM1	1606	sp|O96005|CLPT1_HUMAN Cleft lip and palate transmembrane protein 1 OS=Homo sapiens OX=9606 GN=CLPTM1 PE=1 SV=1
27.1808	27.2438	NaN	27.7486	NaN	26.7456	26.9263	NaN	26.887	26.9733	NaN	NaN	NaN	NaN	NaN	+	3NT_Control	3	2	2	15.9	10.6	10.6	23.668	0	19.515	1423200000	25	27.1008	27.3911	26.8831	NaN	7	3	4	0	0.0253196	0.508023	3.15208	P61006	P61006	Ras-related protein Rab-8A	RAB8A	2340	sp|P61006|RAB8A_HUMAN Ras-related protein Rab-8A OS=Homo sapiens OX=9606 GN=RAB8A PE=1 SV=1
27.6105	NaN	24.9013	NaN	26.607	27.2132	26.4184	27.4255	NaN	27.3682	NaN	NaN	NaN	NaN	NaN			4	4	4	37.6	37.6	37.6	9.681	0	43.722	966300000	23	26.792	26.3729	27.1063	NaN	7	3	4	0	0.353301	-0.733424	-1.02283	R4GN98;P06703	R4GN98;P06703	Protein S100;Protein S100-A6	S100A6	1678	tr|R4GN98|R4GN98_HUMAN Protein S100 (Fragment) OS=Homo sapiens OX=9606 GN=S100A6 PE=1 SV=1;sp|P06703|S10A6_HUMAN Protein S100-A6 OS=Homo sapiens OX=9606 GN=S100A6 PE=1 SV=1
24.5598	24.5591	23.3124	NaN	NaN	25.5367	24.833	24.449	NaN	24.285	NaN	NaN	NaN	NaN	NaN			3	3	3	11.7	11.7	11.7	48.392	0	10.378	239170000	14	24.505	24.1438	24.7759	NaN	7	3	4	0	0.244152	-0.632111	-1.31962	Q6DKJ4;A0A0G2JQK5	Q6DKJ4;A0A0G2JQK5	Nucleoredoxin	NXN	2889	sp|Q6DKJ4|NXN_HUMAN Nucleoredoxin OS=Homo sapiens OX=9606 GN=NXN PE=1 SV=2;tr|A0A0G2JQK5|A0A0G2JQK5_HUMAN Nucleoredoxin (Fragment) OS=Homo sapiens OX=9606 GN=NXN PE=1 SV=1
26.1646	NaN	25.3399	NaN	24.5934	27.3662	25.5974	24.895	NaN	25.1222	26.4996	26.1041	27.268	27.0633	NaN			8	8	8	44.4	44.4	44.4	24.824	0	43.349	806760000	35	26.0012	25.366	25.7452	26.7338	11	3	4	4	0.640463	-0.379202	-0.496703	P09936;D6RE83;D6R956;D6R974;D6RF53	P09936;D6RE83;D6R956;D6R974	Ubiquitin carboxyl-terminal hydrolase isozyme L1;Ubiquitin carboxyl-terminal hydrolase	UCHL1	1740	sp|P09936|UCHL1_HUMAN Ubiquitin carboxyl-terminal hydrolase isozyme L1 OS=Homo sapiens OX=9606 GN=UCHL1 PE=1 SV=2;tr|D6RE83|D6RE83_HUMAN Ubiquitin carboxyl-terminal hydrolase OS=Homo sapiens OX=9606 GN=UCHL1 PE=1 SV=1;tr|D6R956|D6R956_HUMAN Ubiquitin carbo
26.7492	26.8318	26.4102	NaN	NaN	NaN	26.9147	26.9108	27.3425	26.9786	NaN	NaN	NaN	NaN	NaN			3	3	3	34	34	34	11.873	0	73.435	1597800000	22	26.8768	26.6638	27.0366	NaN	7	3	4	0	0.0707313	-0.372883	-2.28907	B8ZZC5;B8ZZA8	B8ZZC5;B8ZZA8		GLS	565	tr|B8ZZC5|B8ZZC5_HUMAN Glutaminase OS=Homo sapiens OX=9606 GN=GLS PE=1 SV=1;tr|B8ZZA8|B8ZZA8_HUMAN Glutaminase OS=Homo sapiens OX=9606 GN=GLS PE=1 SV=1
25.5988	NaN	25.6315	NaN	25.0773	26.2689	25.5063	25.8768	NaN	25.5773	NaN	24.8785	NaN	25.2143	NaN			6	6	6	21.4	21.4	21.4	37.535	0	44.756	476270000	29	25.5144	25.4359	25.8073	25.0464	9	3	4	2	0.204088	-0.371456	-1.46011	Q9H9J2	Q9H9J2	39S ribosomal protein L44, mitochondrial	MRPL44	3557	sp|Q9H9J2|RM44_HUMAN 39S ribosomal protein L44, mitochondrial OS=Homo sapiens OX=9606 GN=MRPL44 PE=1 SV=1
24.9744	24.8048	25.2091	NaN	NaN	NaN	25.0823	25.146	25.5157	25.6781	NaN	NaN	NaN	NaN	NaN			8	8	8	17	17	17	91.112	0	43.092	532640000	27	25.2015	24.9961	25.3555	NaN	7	3	4	0	0.126803	-0.35941	-1.82979	E9PHI4;O94901;H0Y742;H0Y6N5;H7C2K3;C9K051;H7C3X3;H7C019;C9JK55	E9PHI4;O94901;H0Y742;H0Y6N5;H7C2K3	SUN domain-containing protein 1	SUN1	863	tr|E9PHI4|E9PHI4_HUMAN SUN domain-containing protein 1 OS=Homo sapiens OX=9606 GN=SUN1 PE=1 SV=1;sp|O94901|SUN1_HUMAN SUN domain-containing protein 1 OS=Homo sapiens OX=9606 GN=SUN1 PE=1 SV=3;tr|H0Y742|H0Y742_HUMAN SUN domain-containing protein 1 (Fragment
24.9341	24.8498	25.0383	NaN	NaN	25.6288	25.3765	25.0885	NaN	24.9974	NaN	24.9934	24.701	24.9641	NaN			5	5	5	18.6	18.6	18.6	40.763	0	29.041	332540000	24	25.0572	24.9408	25.2728	24.8862	10	3	4	3	0.117708	-0.332014	-1.88769	Q08752	Q08752	Peptidyl-prolyl cis-trans isomerase D	PPID	2536	sp|Q08752|PPID_HUMAN Peptidyl-prolyl cis-trans isomerase D OS=Homo sapiens OX=9606 GN=PPID PE=1 SV=3
24.9618	25.1775	24.4585	NaN	NaN	NaN	24.9657	24.9112	25.8307	24.9377	NaN	NaN	NaN	NaN	NaN			2	2	1	26.7	26.7	11.9	15.271	0	15.115	230480000	8	25.0347	24.8659	25.1613	NaN	7	3	4	0	0.396652	-0.295407	-0.926614	C9J647;F8WF03;F2Z2I0;F2Z2W5	C9J647;F8WF03;F2Z2I0;F2Z2W5		SMPD4	590	tr|C9J647|C9J647_HUMAN Sphingomyelin phosphodiesterase 4 (Fragment) OS=Homo sapiens OX=9606 GN=SMPD4 PE=1 SV=1;tr|F8WF03|F8WF03_HUMAN Sphingomyelin phosphodiesterase 4 OS=Homo sapiens OX=9606 GN=SMPD4 PE=1 SV=1;tr|F2Z2I0|F2Z2I0_HUMAN Sphingomyelin phosphod
25.3671	NaN	25.037	25.2177	NaN	26.648	25.1975	25.1864	NaN	24.9711	NaN	NaN	25.6647	25.0474	NaN			5	5	5	17.1	17.1	17.1	40.764	0	13.153	370980000	22	25.3708	25.2073	25.5007	25.3561	9	3	4	2	0.554516	-0.293481	-0.633057	P00813;F5GWI4;F5GXW0	P00813;F5GWI4	Adenosine deaminase	ADA	922	sp|P00813|ADA_HUMAN Adenosine deaminase OS=Homo sapiens OX=9606 GN=ADA PE=1 SV=3;tr|F5GWI4|F5GWI4_HUMAN Adenosine deaminase OS=Homo sapiens OX=9606 GN=ADA PE=1 SV=1
NaN	25.2669	25.587	NaN	25.2635	25.8814	25.6616	NaN	25.6604	25.4022	26.069	26.24	25.6988	25.9807	NaN			4	4	4	10.2	10.2	10.2	59.897	0	21.705	370820000	14	25.701	25.3725	25.6514	25.9971	11	3	4	4	0.11551	-0.278931	-1.90238	A0A1W2PR68;A0A1W2PQT3;A0A1W2PPH1;A0A1W2PQH3;A0A1W2PQY8;P23368;A0A1W2PQ37;A0A1W2PQF8	A0A1W2PR68;A0A1W2PQT3;A0A1W2PPH1;A0A1W2PQH3;A0A1W2PQY8;P23368;A0A1W2PQ37;A0A1W2PQF8	NAD-dependent malic enzyme, mitochondrial	ME2	281	tr|A0A1W2PR68|A0A1W2PR68_HUMAN Malic enzyme OS=Homo sapiens OX=9606 GN=ME2 PE=1 SV=1;tr|A0A1W2PQT3|A0A1W2PQT3_HUMAN Malic enzyme OS=Homo sapiens OX=9606 GN=ME2 PE=1 SV=1;tr|A0A1W2PPH1|A0A1W2PPH1_HUMAN Malic enzyme OS=Homo sapiens OX=9606 GN=ME2 PE=1 SV=1;t
25.4914	NaN	24.9814	24.7506	NaN	25.4071	25.6678	25.2291	NaN	25.0793	NaN	NaN	NaN	NaN	NaN			6	6	6	28.6	28.6	28.6	28.18	0	41.964	469040000	21	25.2295	25.0744	25.3458	NaN	7	3	4	0	0.303131	-0.271388	-1.14741	P51580	P51580	Thiopurine S-methyltransferase	TPMT	2246	sp|P51580|TPMT_HUMAN Thiopurine S-methyltransferase OS=Homo sapiens OX=9606 GN=TPMT PE=1 SV=1
NaN	26.9234	27.0913	NaN	26.9339	26.7674	NaN	27.2092	27.2996	27.545	NaN	NaN	26.0515	26.6139	NaN			4	4	4	17.8	17.8	17.8	35.505	0	20.956	971370000	27	26.9372	26.9829	27.2053	26.3327	9	3	4	2	0.310947	-0.222361	-1.12689	Q9BQ69	Q9BQ69	O-acetyl-ADP-ribose deacetylase MACROD1	MACROD1	3384	sp|Q9BQ69|MACD1_HUMAN ADP-ribose glycohydrolase MACROD1 OS=Homo sapiens OX=9606 GN=MACROD1 PE=1 SV=2
24.2524	24.4311	23.7569	NaN	NaN	NaN	23.9867	24.6793	24.4558	24.3516	NaN	NaN	NaN	NaN	NaN			5	5	5	4.8	4.8	4.8	162.12	0	27.553	185910000	22	24.2734	24.1468	24.3684	NaN	7	3	4	0	0.398577	-0.221535	-0.922544	Q12769;G3V198;E9PR16	Q12769;G3V198;E9PR16	Nuclear pore complex protein Nup160	NUP160	1014	sp|Q12769|NU160_HUMAN Nuclear pore complex protein Nup160 OS=Homo sapiens OX=9606 GN=NUP160 PE=1 SV=3;tr|G3V198|G3V198_HUMAN Nuclear pore complex protein Nup160 (Fragment) OS=Homo sapiens OX=9606 GN=NUP160 PE=1 SV=2;tr|E9PR16|E9PR16_HUMAN Nuclear pore comp
25.3242	NaN	24.7564	NaN	24.3992	25.4777	24.7396	24.7038	25.1809	NaN	NaN	25.2424	25.407	25.7385	NaN			3	3	3	5.7	5.7	5.7	87.56	0	25.012	325140000	19	25.097	24.8266	25.0255	25.4626	10	3	4	3	0.555167	-0.198913	-0.631976	P38435	P38435	Vitamin K-dependent gamma-carboxylase	GGCX	2093	sp|P38435|VKGC_HUMAN Vitamin K-dependent gamma-carboxylase OS=Homo sapiens OX=9606 GN=GGCX PE=1 SV=2
25.9842	NaN	NaN	26.0366	25.4349	NaN	25.9121	25.9662	26.3049	25.8189	26.295	26.2371	25.9995	26.2181	NaN			2	2	2	22.7	22.7	22.7	12.538	0.0018702	2.6176	531750000	18	26.0189	25.8186	26.0005	26.1874	11	3	4	4	0.413306	-0.181979	-0.891899	P18077;F8WBS5;F8WB72;C9K025	P18077;F8WBS5;F8WB72;C9K025	60S ribosomal protein L35a	RPL35A	1869	sp|P18077|RL35A_HUMAN 60S ribosomal protein L35a OS=Homo sapiens OX=9606 GN=RPL35A PE=1 SV=2;tr|F8WBS5|F8WBS5_HUMAN 60S ribosomal protein L35a OS=Homo sapiens OX=9606 GN=RPL35A PE=1 SV=1;tr|F8WB72|F8WB72_HUMAN 60S ribosomal protein L35a OS=Homo sapiens OX=
25.1674	24.8965	24.7455	NaN	NaN	NaN	25.5182	25.0771	24.3594	25.4967	NaN	25.4002	24.614	24.7131	NaN			3	3	3	14.6	14.6	14.6	50.364	0	18.022	340070000	16	24.9988	24.9365	25.1129	24.9091	10	3	4	3	0.622841	-0.176377	-0.523733	Q9NP92	Q9NP92	28S ribosomal protein S30, mitochondrial	MRPS30	3597	sp|Q9NP92|RT30_HUMAN 39S ribosomal protein S30, mitochondrial OS=Homo sapiens OX=9606 GN=MRPS30 PE=1 SV=2
NaN	23.987	24.1369	NaN	23.7324	23.8151	NaN	24.1763	23.9803	24.4788	NaN	NaN	NaN	NaN	NaN			4	4	4	9.5	9.5	9.5	88.923	0	11.842	123050000	8	24.0438	23.9521	24.1126	NaN	7	3	4	0	0.449088	-0.160516	-0.820841	Q0JRZ9;H7BXJ4;H0YAE2	Q0JRZ9;H7BXJ4	F-BAR domain only protein 2	FCHO2	1138	sp|Q0JRZ9|FCHO2_HUMAN F-BAR domain only protein 2 OS=Homo sapiens OX=9606 GN=FCHO2 PE=1 SV=2;tr|H7BXJ4|H7BXJ4_HUMAN F-BAR domain only protein 2 OS=Homo sapiens OX=9606 GN=FCHO2 PE=1 SV=1
24.7484	24.9038	24.848	NaN	NaN	NaN	25.3462	25.1141	24.9613	24.5512	NaN	NaN	NaN	NaN	NaN			9	9	9	26.2	26.2	26.2	58.06	0	33.392	336190000	13	24.9247	24.8334	24.9932	NaN	7	3	4	0	0.463817	-0.159758	-0.792833	Q13884;A0A3B3ITC2;E5RIX7	Q13884;A0A3B3ITC2	Beta-1-syntrophin	SNTB1	2636	sp|Q13884|SNTB1_HUMAN Beta-1-syntrophin OS=Homo sapiens OX=9606 GN=SNTB1 PE=1 SV=3;tr|A0A3B3ITC2|A0A3B3ITC2_HUMAN Beta-1-syntrophin OS=Homo sapiens OX=9606 GN=SNTB1 PE=1 SV=1
25.3258	25.5459	24.9486	NaN	NaN	26.6786	24.8356	24.9212	NaN	25.2485	25.4787	NaN	25.2724	25.8246	NaN			5	5	5	14.8	14.8	14.8	64.969	0	19.244	331610000	23	25.408	25.2734	25.421	25.5252	10	3	4	3	0.790998	-0.147514	-0.279577	P49902;Q5JUV6;H0YHR8;Q5JUV3;Q5JUV4	P49902	Cytosolic purine 5-nucleotidase	NT5C2	2216	sp|P49902|5NTC_HUMAN Cytosolic purine 5-nucleotidase OS=Homo sapiens OX=9606 GN=NT5C2 PE=1 SV=1
26.6216	NaN	27.1265	NaN	26.5391	27.2863	26.6968	26.7585	NaN	26.8953	NaN	NaN	NaN	NaN	NaN			5	5	5	21.9	21.9	21.9	28.683	0	21.009	1178700000	27	26.8463	26.7624	26.9092	NaN	7	3	4	0	0.532919	-0.146845	-0.669374	A0A087WT99;Q9H0W9;E9PQS1;A0A1W2PRB8;E9PPB5;E9PJU8;E9PR95;E9PSC3;E9PLC5;E9PLB3;E9PIP1	A0A087WT99;Q9H0W9;E9PQS1;A0A1W2PRB8;E9PPB5;E9PJU8	Ester hydrolase C11orf54	C11orf54	17	tr|A0A087WT99|A0A087WT99_HUMAN Ester hydrolase C11orf54 OS=Homo sapiens OX=9606 GN=C11orf54 PE=1 SV=1;sp|Q9H0W9|CK054_HUMAN Ester hydrolase C11orf54 OS=Homo sapiens OX=9606 GN=C11orf54 PE=1 SV=1;tr|E9PQS1|E9PQS1_HUMAN Ester hydrolase C11orf54 (Fragment) OS
24.9927	24.5958	NaN	NaN	24.7422	24.8499	25.0756	24.9813	NaN	24.7735	NaN	24.8661	24.8492	NaN	NaN			4	4	4	16	16	16	36.851	0	15.77	268390000	20	24.8585	24.7769	24.9201	24.8577	9	3	4	2	0.305348	-0.143214	-1.14155	H0Y621;H0Y5K5;Q9Y282;A0A1W2PPS8;A6PVJ2;A0A0C4DH46	H0Y621;H0Y5K5;Q9Y282;A0A1W2PPS8	Endoplasmic reticulum-Golgi intermediate compartment protein 3	ERGIC3	1051	tr|H0Y621|H0Y621_HUMAN Endoplasmic reticulum-Golgi intermediate compartment protein 3 (Fragment) OS=Homo sapiens OX=9606 GN=ERGIC3 PE=1 SV=1;tr|H0Y5K5|H0Y5K5_HUMAN Endoplasmic reticulum-Golgi intermediate compartment protein 3 (Fragment) OS=Homo sapiens OX
25.2062	24.989	25.3265	NaN	NaN	NaN	25.1602	25.1935	25.5466	25.3265	NaN	NaN	NaN	NaN	NaN			6	6	6	11.7	11.7	11.7	79.443	0	26.509	391850000	20	25.2498	25.1739	25.3067	NaN	7	3	4	0	0.36247	-0.132838	-1.0017	Q8NBF2	Q8NBF2	NHL repeat-containing protein 2	NHLRC2	3067	sp|Q8NBF2|NHLC2_HUMAN NHL repeat-containing protein 2 OS=Homo sapiens OX=9606 GN=NHLRC2 PE=1 SV=1
25.6655	25.5227	25.8072	NaN	NaN	NaN	26.1237	26.0001	25.5174	25.5165	NaN	NaN	NaN	NaN	NaN			4	4	3	19.8	19.8	16.6	36.551	0	15.706	410170000	13	25.7362	25.6651	25.7895	NaN	7	3	4	0	0.56268	-0.124317	-0.619569	Q86VM6;C9JP00;A0A0A0MQX8;Q9NR56;H7C4T5;C9J4T8;B1AKI6;Q9NUK0	Q86VM6;C9JP00;A0A0A0MQX8;Q9NR56;H7C4T5	Muscleblind-like protein 1	MBNL1	119	tr|Q86VM6|Q86VM6_HUMAN MBNL1 protein OS=Homo sapiens OX=9606 GN=MBNL1 PE=1 SV=1;tr|C9JP00|C9JP00_HUMAN Muscleblind-like protein 1 OS=Homo sapiens OX=9606 GN=MBNL1 PE=1 SV=1;tr|A0A0A0MQX8|A0A0A0MQX8_HUMAN Muscleblind-like protein 1 OS=Homo sapiens OX=9606 G
25.0851	NaN	NaN	25.339	25.4914	NaN	25.5925	25.326	25.4394	25.334	NaN	NaN	NaN	NaN	NaN			3	3	3	24.2	24.2	24.2	17.676	0	37.111	291700000	13	25.3725	25.3052	25.423	NaN	7	3	4	0	0.383642	-0.117813	-0.954551	Q8WVJ2;E5RFP0	Q8WVJ2;E5RFP0	NudC domain-containing protein 2	NUDCD2	3149	sp|Q8WVJ2|NUDC2_HUMAN NudC domain-containing protein 2 OS=Homo sapiens OX=9606 GN=NUDCD2 PE=1 SV=1;tr|E5RFP0|E5RFP0_HUMAN NudC domain-containing protein 2 OS=Homo sapiens OX=9606 GN=NUDCD2 PE=1 SV=1
NaN	25.0969	24.7546	NaN	24.6803	24.7282	NaN	24.9162	25.2846	24.9147	NaN	24.8276	NaN	24.8336	NaN			4	4	4	7.7	7.7	7.7	83.069	0	22.982	293440000	27	24.893	24.8439	24.9609	24.8306	9	3	4	2	0.532802	-0.11703	-0.669574	Q8IYQ7	Q8IYQ7	Threonine synthase-like 1	THNSL1	3027	sp|Q8IYQ7|THNS1_HUMAN Threonine synthase-like 1 OS=Homo sapiens OX=9606 GN=THNSL1 PE=1 SV=2
24.8826	24.9337	24.7624	NaN	NaN	NaN	24.4785	25.3062	25.1574	24.9536	NaN	NaN	NaN	NaN	NaN			3	3	3	11.5	11.5	11.5	55.468	0	6.4435	251280000	9	24.9249	24.8596	24.9739	NaN	7	3	4	0	0.621523	-0.114351	-0.525771	Q9NRY5;E7ESJ7;E5RGF9	Q9NRY5;E7ESJ7	Protein FAM114A2	FAM114A2	813	sp|Q9NRY5|F1142_HUMAN Protein FAM114A2 OS=Homo sapiens OX=9606 GN=FAM114A2 PE=1 SV=4;tr|E7ESJ7|E7ESJ7_HUMAN Protein FAM114A2 OS=Homo sapiens OX=9606 GN=FAM114A2 PE=1 SV=1
26.0708	26.1364	26.0114	NaN	NaN	NaN	25.7257	26.165	26.6849	26.1382	NaN	NaN	25.371	25.8116	NaN			10	10	10	19.7	19.7	19.7	83.785	0	26.706	717860000	24	26.0128	26.0729	26.1785	25.5913	9	3	4	2	0.67124	-0.105597	-0.450459	P13807;M0QYU1	P13807	Glycogen [starch] synthase, muscle	GYS1	1811	sp|P13807|GYS1_HUMAN Glycogen [starch] synthase, muscle OS=Homo sapiens OX=9606 GN=GYS1 PE=1 SV=2
NaN	NaN	24.9432	25.5545	25.2368	26.4841	24.8318	24.8392	NaN	25.23	26.3931	NaN	25.7241	26.0541	NaN			2	2	2	27.2	27.2	27.2	9.3697	0	10.489	391810000	20	25.5291	25.2448	25.3463	26.0571	10	3	4	3	0.842595	-0.101452	-0.209137	O00483	O00483	Cytochrome c oxidase subunit NDUFA4	NDUFA4	1312	sp|O00483|NDUA4_HUMAN Cytochrome c oxidase subunit NDUFA4 OS=Homo sapiens OX=9606 GN=NDUFA4 PE=1 SV=1
24.8158	25.1528	24.8313	NaN	NaN	25.0114	24.914	25.396	NaN	24.7676	NaN	NaN	NaN	24.8093	NaN			5	5	5	25.1	25.1	25.1	27.746	0	9.548	392180000	19	24.9623	24.9333	25.0222	24.8093	8	3	4	1	0.6484	-0.0889611	-0.484665	F8VP71;F8VVQ3;F8VZA2;Q6P1Q0;H0YIV5;H0YHF4;F8VR33;F8VS60;F8W1Z2;F8W0R0;F8VPY5	F8VP71;F8VVQ3;F8VZA2;Q6P1Q0;H0YIV5;H0YHF4;F8VR33;F8VS60;F8W1Z2	LETM1 domain-containing protein 1	LETMD1	967	tr|F8VP71|F8VP71_HUMAN LETM1 domain-containing protein 1 OS=Homo sapiens OX=9606 GN=LETMD1 PE=1 SV=1;tr|F8VVQ3|F8VVQ3_HUMAN LETM1 domain-containing protein 1 (Fragment) OS=Homo sapiens OX=9606 GN=LETMD1 PE=1 SV=8;tr|F8VZA2|F8VZA2_HUMAN LETM1 domain-contain
25.6805	25.4666	25.2797	NaN	NaN	NaN	25.8046	25.5436	25.464	25.4116	NaN	NaN	NaN	NaN	NaN			7	7	7	20.2	20.2	20.2	41.182	0	52.165	514940000	21	25.5215	25.4756	25.5559	NaN	7	3	4	0	0.594795	-0.0803577	-0.567677	Q9BYG5;R4GMM2;Q9NPB6;Q9BYG4	Q9BYG5	Partitioning defective 6 homolog beta	PARD6B	3467	sp|Q9BYG5|PAR6B_HUMAN Partitioning defective 6 homolog beta OS=Homo sapiens OX=9606 GN=PARD6B PE=1 SV=1
25.4119	NaN	25.8056	NaN	25.1429	26.3975	25.1996	NaN	25.5962	24.9167	NaN	NaN	NaN	NaN	NaN			2	2	2	1.3	1.3	1.3	211.1	0.0064583	2.0917	644380000	13	25.4958	25.4535	25.5275	NaN	7	3	4	0	0.864858	-0.0740482	-0.179144	O75051	O75051	Plexin-A2	PLXNA2	1470	sp|O75051|PLXA2_HUMAN Plexin-A2 OS=Homo sapiens OX=9606 GN=PLXNA2 PE=1 SV=4
25.0893	25.1532	24.7952	NaN	NaN	NaN	24.8564	25.7401	24.9409	24.7955	NaN	NaN	NaN	NaN	NaN			2	2	2	7	7	7	58.683	0	14.121	276230000	11	25.0529	25.0125	25.0832	NaN	7	3	4	0	0.808882	-0.070701	-0.254997	A0A0C4DG88;P14859	A0A0C4DG88;P14859	POU domain protein;POU domain, class 2, transcription factor 1	POU2F1	193	tr|A0A0C4DG88|A0A0C4DG88_HUMAN POU domain protein (Fragment) OS=Homo sapiens OX=9606 GN=POU2F1 PE=1 SV=1;sp|P14859|PO2F1_HUMAN POU domain, class 2, transcription factor 1 OS=Homo sapiens OX=9606 GN=POU2F1 PE=1 SV=2
25.7195	24.8829	25.7065	NaN	NaN	NaN	24.4817	25.8906	25.452	26.1162	NaN	NaN	NaN	NaN	NaN			9	9	9	22.6	22.6	22.6	70.177	0	39.662	393780000	19	25.4642	25.4363	25.4851	NaN	7	3	4	0	0.923984	-0.0488264	-0.100326	J3KT10;Q9BW27;J3QL54;F5H0W7;J3QLH0;J3QLD4;J3QL91;J3KRC0;J3QLV0;J3QS63;J3KS87;J3KTC7;J3KSH3	J3KT10;Q9BW27;J3QL54;F5H0W7;J3QLH0	Nuclear pore complex protein Nup85	NUP85	1203	tr|J3KT10|J3KT10_HUMAN Nuclear pore complex protein Nup85 OS=Homo sapiens OX=9606 GN=NUP85 PE=1 SV=1;sp|Q9BW27|NUP85_HUMAN Nuclear pore complex protein Nup85 OS=Homo sapiens OX=9606 GN=NUP85 PE=1 SV=1;tr|J3QL54|J3QL54_HUMAN Nuclear pore complex protein Nup
24.4479	24.3472	24.2638	NaN	NaN	NaN	24.8306	24.5926	24.3525	23.7704	NaN	NaN	NaN	NaN	NaN			3	3	3	16.7	16.7	16.7	33.908	0	9.4525	157010000	14	24.3721	24.353	24.3865	NaN	7	3	4	0	0.906839	-0.033562	-0.123079	Q9H7M9	Q9H7M9	Platelet receptor Gi24	C10orf54	3544	sp|Q9H7M9|VISTA_HUMAN V-type immunoglobulin domain-containing suppressor of T-cell activation OS=Homo sapiens OX=9606 GN=VSIR PE=1 SV=3
27.1581	27.2533	27.0062	NaN	NaN	NaN	27.0424	27.0411	27.3466	27.2172	NaN	NaN	NaN	NaN	NaN			7	7	7	8.6	8.6	8.6	141.32	0	23.681	887770000	26	27.1522	27.1392	27.1619	NaN	7	3	4	0	0.839962	-0.0226399	-0.212698	Q8N3U4;B1AMT4;Q68DW7;Q8WVM7	Q8N3U4	Cohesin subunit SA-2	STAG2	3049	sp|Q8N3U4|STAG2_HUMAN Cohesin subunit SA-2 OS=Homo sapiens OX=9606 GN=STAG2 PE=1 SV=3
28.6267	28.4785	27.9778	NaN	NaN	NaN	28.0039	28.2737	28.9085	28.2711	NaN	28.4304	27.5269	27.8162	NaN			9	9	9	13	13	13	105.06	0	19.216	1086600000	34	28.2314	28.361	28.3643	27.9245	10	3	4	3	0.991075	-0.00329669	-0.0117553	P48200;H0YNL8;H0YMA8;H0YL48	P48200;H0YNL8	Iron-responsive element-binding protein 2	IREB2	2175	sp|P48200|IREB2_HUMAN Iron-responsive element-binding protein 2 OS=Homo sapiens OX=9606 GN=IREB2 PE=1 SV=4;tr|H0YNL8|H0YNL8_HUMAN Iron-responsive element-binding protein 2 OS=Homo sapiens OX=9606 GN=IREB2 PE=1 SV=2
24.9887	25.369	24.8542	NaN	NaN	NaN	24.9974	25.0444	25.1345	25.1133	NaN	NaN	NaN	NaN	NaN			9	9	9	14.2	14.2	14.2	106.37	0	45.594	381900000	18	25.0717	25.0706	25.0724	NaN	7	3	4	0	0.989841	-0.00179688	-0.013382	P57740;H0YG15;G3V1T4	P57740	Nuclear pore complex protein Nup107	NUP107	2325	sp|P57740|NU107_HUMAN Nuclear pore complex protein Nup107 OS=Homo sapiens OX=9606 GN=NUP107 PE=1 SV=1
24.8082	24.5491	24.6096	NaN	NaN	NaN	24.8925	24.7807	24.4606	24.4774	NaN	NaN	NaN	NaN	NaN			5	5	5	14	14	14	48.886	0	13.441	320560000	8	24.654	24.6556	24.6528	NaN	7	3	4	0	0.985139	0.00282319	0.0195759	Q9NPH0;A0A087WYU6;A0A0A0MS36;V9GZ71;A0A087WW36	Q9NPH0;A0A087WYU6;A0A0A0MS36;V9GZ71	Lysophosphatidic acid phosphatase type 6	ACP6	3604	sp|Q9NPH0|PPA6_HUMAN Lysophosphatidic acid phosphatase type 6 OS=Homo sapiens OX=9606 GN=ACP6 PE=1 SV=3;tr|A0A087WYU6|A0A087WYU6_HUMAN Lysophosphatidic acid phosphatase type 6 (Fragment) OS=Homo sapiens OX=9606 GN=ACP6 PE=1 SV=1;tr|A0A0A0MS36|A0A0A0MS36_HU
25.8817	NaN	25.8746	NaN	26.1052	NaN	26.2956	25.528	25.9533	26.0213	NaN	NaN	NaN	NaN	NaN			5	5	5	30.5	30.5	30.5	39.31	0	98.119	576720000	14	25.9514	25.9539	25.9495	NaN	7	3	4	0	0.983522	0.00430377	0.0217057	Q96DI7;Q9NSS8	Q96DI7;Q9NSS8	U5 small nuclear ribonucleoprotein 40 kDa protein	SNRNP40;DKFZp434D199	3256	sp|Q96DI7|SNR40_HUMAN U5 small nuclear ribonucleoprotein 40 kDa protein OS=Homo sapiens OX=9606 GN=SNRNP40 PE=1 SV=1;tr|Q9NSS8|Q9NSS8_HUMAN U5 small nuclear ribonucleoprotein 40 kDa protein OS=Homo sapiens OX=9606 GN=SNRNP40 PE=1 SV=1
25.3807	25.4705	24.8804	NaN	NaN	25.113	25.3831	NaN	25.1325	25.3197	NaN	NaN	NaN	NaN	NaN			8	8	8	16	16	16	92.902	0	57.297	465400000	23	25.24	25.2439	25.2371	NaN	7	3	4	0	0.970147	0.0068059	0.0393327	O60341;R4GMQ1;R4GMP9	O60341;R4GMQ1;R4GMP9	Lysine-specific histone demethylase 1A	KDM1A	1439	sp|O60341|KDM1A_HUMAN Lysine-specific histone demethylase 1A OS=Homo sapiens OX=9606 GN=KDM1A PE=1 SV=2;tr|R4GMQ1|R4GMQ1_HUMAN Lysine-specific histone demethylase OS=Homo sapiens OX=9606 GN=KDM1A PE=1 SV=2;tr|R4GMP9|R4GMP9_HUMAN Lysine-specific histone dem
24.6563	NaN	24.5572	NaN	24.8735	NaN	24.8216	24.937	24.434	24.5415	NaN	NaN	NaN	NaN	NaN			5	5	5	21.3	21.3	21.3	30.243	0	19.57	216470000	16	24.6887	24.6957	24.6835	NaN	7	3	4	0	0.942326	0.0121315	0.0760536	Q9BYD2;Q5SZR1;A0A1W2PPE5;A0A1W2PQB6;A0A1W2PS92	Q9BYD2;Q5SZR1;A0A1W2PPE5;A0A1W2PQB6;A0A1W2PS92	39S ribosomal protein L9, mitochondrial	MRPL9	3464	sp|Q9BYD2|RM09_HUMAN 39S ribosomal protein L9, mitochondrial OS=Homo sapiens OX=9606 GN=MRPL9 PE=1 SV=2;tr|Q5SZR1|Q5SZR1_HUMAN 39S ribosomal protein L9, mitochondrial OS=Homo sapiens OX=9606 GN=MRPL9 PE=1 SV=1;tr|A0A1W2PPE5|A0A1W2PPE5_HUMAN 39S ribosomal p
24.5306	25.1604	NaN	NaN	25.9021	NaN	24.8861	25.0241	25.551	25.1702	NaN	24.5847	NaN	NaN	NaN			8	8	8	13.4	13.4	13.4	99.365	0	24.949	378250000	24	25.1011	25.1977	25.1578	24.5847	8	3	4	1	0.918962	0.0398447	0.106983	A0A0A0MTB8;Q8NI36	A0A0A0MTB8;Q8NI36	WD repeat-containing protein 36	WDR36	160	tr|A0A0A0MTB8|A0A0A0MTB8_HUMAN WD repeat-containing protein 36 OS=Homo sapiens OX=9606 GN=WDR36 PE=1 SV=1;sp|Q8NI36|WDR36_HUMAN WD repeat-containing protein 36 OS=Homo sapiens OX=9606 GN=WDR36 PE=1 SV=1
25.1191	25.3597	24.8613	NaN	NaN	25.9002	23.8322	NaN	25.6025	24.9464	25.8011	25.7059	NaN	25.5868	NaN			3	3	2	6.5	6.5	4.2	59.925	0	8.5235	1110500000	50	25.2715	25.1134	25.0703	25.6979	10	3	4	3	0.94124	0.0430409	0.0774889	P0DTE4;D6RFW5;A0A140T9Z0;D6RHF3;P06133	P0DTE4;D6RFW5;A0A140T9Z0		UGT2A1	1747	sp|P0DTE4|UD2A1_HUMAN UDP-glucuronosyltransferase 2A1 OS=Homo sapiens OX=9606 GN=UGT2A1 PE=1 SV=1;tr|D6RFW5|D6RFW5_HUMAN UDP-glucuronosyltransferase OS=Homo sapiens OX=9606 GN=UGT2A1 PE=1 SV=2;tr|A0A140T9Z0|A0A140T9Z0_HUMAN UDP-glucuronosyltransferase 2A1
25.5601	NaN	NaN	26.576	26.3186	NaN	26.3034	26.4443	25.6464	25.9156	NaN	25.3058	NaN	NaN	NaN			4	4	4	36.1	36.1	36.1	17.629	0	18.442	667990000	14	26.0088	26.1516	26.0774	25.3058	8	3	4	1	0.833099	0.074121	0.221997	K7ERP4;A0A087X2I2;A0A087WT12;P36969;K7EKX7;R4GNE4;K7ENB4;K7EJ20;A0A0A0MTT1;A0A087X247	K7ERP4;A0A087X2I2;A0A087WT12;P36969;K7EKX7;R4GNE4;K7ENB4;K7EJ20;A0A0A0MTT1	Glutathione peroxidase;Phospholipid hydroperoxide glutathione peroxidase, mitochondrial	GPX4	14	tr|K7ERP4|K7ERP4_HUMAN Glutathione peroxidase (Fragment) OS=Homo sapiens OX=9606 GN=GPX4 PE=1 SV=1;tr|A0A087X2I2|A0A087X2I2_HUMAN Glutathione peroxidase OS=Homo sapiens OX=9606 GN=GPX4 PE=1 SV=1;tr|A0A087WT12|A0A087WT12_HUMAN Glutathione peroxidase OS=Homo
25.3807	24.8157	24.641	NaN	NaN	25.2719	24.5	NaN	24.7969	24.8578	24.7237	24.9506	24.517	24.9823	NaN			9	9	9	11.4	11.4	11.4	132.95	0	36.391	287040000	22	24.858	24.9458	24.8566	24.7934	11	3	4	4	0.750218	0.0891654	0.336414	Q9HD20;H7C3H2	Q9HD20	Manganese-transporting ATPase 13A1	ATP13A1	3588	sp|Q9HD20|AT131_HUMAN Manganese-transporting ATPase 13A1 OS=Homo sapiens OX=9606 GN=ATP13A1 PE=1 SV=2
24.9811	25.231	25.0996	NaN	NaN	NaN	24.9934	24.9279	25.0492	24.9459	NaN	NaN	NaN	NaN	NaN			3	3	3	25.6	25.6	25.6	18.856	0	7.8565	290680000	8	25.0326	25.1039	24.9791	NaN	7	3	4	0	0.127594	0.124831	1.82495	Q9UMX5	Q9UMX5	Neudesin	NENF	3823	sp|Q9UMX5|NENF_HUMAN Neudesin OS=Homo sapiens OX=9606 GN=NENF PE=1 SV=1
25.7228	25.4095	NaN	NaN	24.8133	NaN	25.4905	25.383	24.1862	25.6978	NaN	NaN	NaN	NaN	NaN			2	2	2	2.3	2.3	2.3	123.63	0.0096889	1.8984	269620000	9	25.2433	25.3152	25.1894	NaN	7	3	4	0	0.795719	0.125825	0.273071	B1ANS9;A0A0A0MSY1	B1ANS9;A0A0A0MSY1	WD repeat-containing protein 64	WDR64	495	sp|B1ANS9|WDR64_HUMAN WD repeat-containing protein 64 OS=Homo sapiens OX=9606 GN=WDR64 PE=2 SV=1;tr|A0A0A0MSY1|A0A0A0MSY1_HUMAN WD repeat-containing protein 64 (Fragment) OS=Homo sapiens OX=9606 GN=WDR64 PE=1 SV=1
25.6357	24.5261	24.631	NaN	NaN	NaN	25.2115	24.7662	24.3299	24.8989	NaN	NaN	NaN	NaN	NaN			4	4	4	10.7	10.7	10.7	54.812	0	9.651	363560000	13	24.857	24.9309	24.8016	NaN	7	3	4	0	0.738693	0.129294	0.352702	O75844	O75844	CAAX prenyl protease 1 homolog	ZMPSTE24	1515	sp|O75844|FACE1_HUMAN CAAX prenyl protease 1 homolog OS=Homo sapiens OX=9606 GN=ZMPSTE24 PE=1 SV=2
25.7534	25.6189	25.8077	NaN	NaN	NaN	25.9942	25.8245	25.4788	25.0737	NaN	NaN	NaN	NaN	NaN			6	6	6	19.5	19.5	19.5	56.974	0	43.285	495330000	14	25.6502	25.7267	25.5928	NaN	7	3	4	0	0.608818	0.133875	0.545555	Q8NC56;H0Y9B7;D6RBV0;H7C2Z0	Q8NC56	LEM domain-containing protein 2	LEMD2	3079	sp|Q8NC56|LEMD2_HUMAN LEM domain-containing protein 2 OS=Homo sapiens OX=9606 GN=LEMD2 PE=1 SV=1
25.2679	24.8097	25.6361	NaN	NaN	NaN	24.8045	25.2655	25.9551	24.3877	NaN	NaN	NaN	NaN	NaN			5	5	5	7.1	7.1	7.1	141.15	0	26.887	370220000	15	25.1609	25.2379	25.1032	NaN	7	3	4	0	0.774257	0.134681	0.302769	Q92797;M0R3C7;A0A087WUE9;M0R033;M0R1C2;M0R180;M0QXP5	Q92797;M0R3C7;A0A087WUE9	Symplekin	SYMPK	3193	sp|Q92797|SYMPK_HUMAN Symplekin OS=Homo sapiens OX=9606 GN=SYMPK PE=1 SV=2;tr|M0R3C7|M0R3C7_HUMAN Symplekin OS=Homo sapiens OX=9606 GN=SYMPK PE=1 SV=1;tr|A0A087WUE9|A0A087WUE9_HUMAN Symplekin OS=Homo sapiens OX=9606 GN=SYMPK PE=1 SV=1
NaN	25.1073	24.9861	NaN	25.3618	25.12	24.905	25.2259	NaN	24.7423	NaN	24.8593	25.4421	25.1593	NaN			4	4	4	11.9	11.9	11.9	40.422	0	15.044	310820000	26	25.0909	25.1517	24.9983	25.1535	10	3	4	3	0.376486	0.153447	0.970244	Q9Y617	Q9Y617	Phosphoserine aminotransferase	PSAT1	3933	sp|Q9Y617|SERC_HUMAN Phosphoserine aminotransferase OS=Homo sapiens OX=9606 GN=PSAT1 PE=1 SV=2
24.4019	25.0317	25.1641	NaN	NaN	25.1546	24.501	24.8721	NaN	24.2206	NaN	NaN	25.57	25.7692	NaN			4	2	2	7.2	5.3	5.3	60.103	0	4.8586	316390000	27	24.965	24.8659	24.6871	25.6696	9	3	4	2	0.591868	0.178823	0.572333	O75475	O75475	PC4 and SFRS1-interacting protein	PSIP1	1495	sp|O75475|PSIP1_HUMAN PC4 and SFRS1-interacting protein OS=Homo sapiens OX=9606 GN=PSIP1 PE=1 SV=1
25.3769	25.12	25.368	NaN	NaN	NaN	25.5331	24.686	25.5341	24.6671	NaN	NaN	NaN	NaN	NaN			4	4	4	24.2	24.2	24.2	25.387	0	24.149	319890000	25	25.1836	25.2883	25.1051	NaN	7	3	4	0	0.569455	0.183221	0.60847	Q9BV86;S4R344;S4R3J7;S4R338	Q9BV86	N-terminal Xaa-Pro-Lys N-methyltransferase 1;N-terminal Xaa-Pro-Lys N-methyltransferase 1, N-terminally processed	NTMT1	3428	sp|Q9BV86|NTM1A_HUMAN N-terminal Xaa-Pro-Lys N-methyltransferase 1 OS=Homo sapiens OX=9606 GN=NTMT1 PE=1 SV=3
25.8448	26.2345	26.486	NaN	NaN	26.3186	25.9645	NaN	25.8401	25.8613	26.351	25.8861	26.2801	25.9595	NaN			6	5	5	18.8	14.3	14.3	49.355	0	19.585	589130000	14	26.0933	26.1884	25.9961	26.1192	11	3	4	4	0.388863	0.1923	0.94325	A0A087X142;A6NMH6;A6NFQ9;F8W8I8;Q92599;A0A0A0MRP8;C9J4G8;C9JV02	A0A087X142;A6NMH6;A6NFQ9;F8W8I8;Q92599	Septin-8	2008-09-01	93	tr|A0A087X142|A0A087X142_HUMAN Septin-8 OS=Homo sapiens OX=9606 GN=SEPTIN8 PE=1 SV=1;tr|A6NMH6|A6NMH6_HUMAN Septin-8 OS=Homo sapiens OX=9606 GN=SEPTIN8 PE=1 SV=1;tr|A6NFQ9|A6NFQ9_HUMAN Septin-8 OS=Homo sapiens OX=9606 GN=SEPTIN8 PE=1 SV=1;tr|F8W8I8|F8W8I8_
25.5967	25.6823	25.6594	NaN	NaN	NaN	25.565	25.6399	25.3682	25.2402	NaN	NaN	NaN	NaN	NaN			6	6	5	21.5	21.5	19.6	58.259	0	78.804	490580000	10	25.536	25.6461	25.4533	NaN	7	3	4	0	0.140232	0.192817	1.75161	P52594;C9J2I0;B8ZZY2;A0A0C4DG34	P52594;C9J2I0;B8ZZY2	Arf-GAP domain and FG repeat-containing protein 1	AGFG1	2261	sp|P52594|AGFG1_HUMAN Arf-GAP domain and FG repeat-containing protein 1 OS=Homo sapiens OX=9606 GN=AGFG1 PE=1 SV=2;tr|C9J2I0|C9J2I0_HUMAN Arf-GAP domain and FG repeat-containing protein 1 (Fragment) OS=Homo sapiens OX=9606 GN=AGFG1 PE=1 SV=8;tr|B8ZZY2|B8ZZ
NaN	25.4851	25.6014	25.2416	NaN	25.3988	NaN	25.1712	25.1804	25.2163	25.0713	24.7325	NaN	25.336	NaN			3	3	3	7.3	7.3	7.3	68.106	0	11.657	287960000	27	25.2435	25.4427	25.2417	25.0466	10	3	4	3	0.123961	0.201024	1.84741	E9PIN3;Q9UBU9;B4E227;E9PLA7	E9PIN3;Q9UBU9;B4E227	Nuclear RNA export factor 1	NXF1	869	tr|E9PIN3|E9PIN3_HUMAN Nuclear RNA export factor 1 (Fragment) OS=Homo sapiens OX=9606 GN=NXF1 PE=1 SV=1;sp|Q9UBU9|NXF1_HUMAN Nuclear RNA export factor 1 OS=Homo sapiens OX=9606 GN=NXF1 PE=1 SV=1;tr|B4E227|B4E227_HUMAN Nuclear RNA export factor 1 OS=Homo sa
26.6046	NaN	27.0609	NaN	26.8293	NaN	26.6521	26.6845	26.7027	26.3695	NaN	NaN	NaN	NaN	NaN			6	6	6	26	26	26	41.024	0	60.869	767090000	23	26.7005	26.8316	26.6022	NaN	7	3	4	0	0.171921	0.229378	1.59354	Q9Y2Z0	Q9Y2Z0	Suppressor of G2 allele of SKP1 homolog	SUGT1	3874	sp|Q9Y2Z0|SGT1_HUMAN Protein SGT1 homolog OS=Homo sapiens OX=9606 GN=SUGT1 PE=1 SV=3
23.7762	NaN	23.6656	NaN	23.4193	23.0007	23.6968	23.5655	NaN	23.2748	NaN	NaN	NaN	NaN	NaN			3	3	3	12.1	12.1	12.1	29.396	0	16.608	333030000	38	23.4855	23.6203	23.3844	NaN	7	3	4	0	0.299547	0.235909	1.15698	Q969U7;V9GZ55;K7ENR6;K7ER45	Q969U7;V9GZ55;K7ENR6	Proteasome assembly chaperone 2	PSMG2	3219	sp|Q969U7|PSMG2_HUMAN Proteasome assembly chaperone 2 OS=Homo sapiens OX=9606 GN=PSMG2 PE=1 SV=1;tr|V9GZ55|V9GZ55_HUMAN Proteasome assembly chaperone 2 (Fragment) OS=Homo sapiens OX=9606 GN=PSMG2 PE=1 SV=1;tr|K7ENR6|K7ENR6_HUMAN Proteasome assembly chapero
NaN	26.1367	26.0585	25.8833	NaN	NaN	26.1281	25.918	25.5952	25.5052	NaN	NaN	NaN	NaN	NaN			6	6	6	23.4	23.4	23.4	38.388	0	16.326	662030000	21	25.8893	26.0262	25.7866	NaN	7	3	4	0	0.244817	0.239543	1.31748	P20042	P20042	Eukaryotic translation initiation factor 2 subunit 2	EIF2S2	1890	sp|P20042|IF2B_HUMAN Eukaryotic translation initiation factor 2 subunit 2 OS=Homo sapiens OX=9606 GN=EIF2S2 PE=1 SV=2
25.9741	25.4174	25.4507	NaN	NaN	NaN	25.6575	25.2919	24.8783	25.4339	NaN	NaN	NaN	NaN	NaN			11	11	11	24.1	24.1	24.1	70.973	0	28.931	465180000	30	25.4434	25.6141	25.3154	NaN	7	3	4	0	0.27844	0.298692	1.21547	Q14258;A0A3B3IUA7	Q14258;A0A3B3IUA7	E3 ubiquitin/ISG15 ligase TRIM25	TRIM25	2658	sp|Q14258|TRI25_HUMAN E3 ubiquitin/ISG15 ligase TRIM25 OS=Homo sapiens OX=9606 GN=TRIM25 PE=1 SV=2;tr|A0A3B3IUA7|A0A3B3IUA7_HUMAN E3 ubiquitin/ISG15 ligase TRIM25 OS=Homo sapiens OX=9606 GN=TRIM25 PE=1 SV=1
25.5252	NaN	26.0937	NaN	25.6219	NaN	25.8675	24.3365	25.8461	25.6313	NaN	NaN	NaN	NaN	NaN			6	6	6	5.6	5.6	5.6	178.97	0	17.812	399290000	17	25.5603	25.7469	25.4204	NaN	7	3	4	0	0.506332	0.32654	0.715464	Q9H3S7	Q9H3S7	Tyrosine-protein phosphatase non-receptor type 23	PTPN23	3520	sp|Q9H3S7|PTN23_HUMAN Tyrosine-protein phosphatase non-receptor type 23 OS=Homo sapiens OX=9606 GN=PTPN23 PE=1 SV=1
28.295	28.9135	NaN	NaN	29.0323	27.3656	28.341	28.2478	NaN	28.8809	NaN	NaN	25.5301	NaN	NaN			4	4	4	8.6	8.6	8.6	75.718	0	13.228	2306500000	21	28.0758	28.7469	28.2088	25.5301	8	3	4	1	0.254002	0.538096	1.2884	Q9H6T3	Q9H6T3	RNA polymerase II-associated protein 3	RPAP3	3540	sp|Q9H6T3|RPAP3_HUMAN RNA polymerase II-associated protein 3 OS=Homo sapiens OX=9606 GN=RPAP3 PE=1 SV=2
26.3659	24.934	25.5212	NaN	NaN	NaN	25.7308	26.8006	23.3038	23.5648	NaN	NaN	NaN	NaN	NaN			3	3	3	56.6	56.6	56.6	11.25	0	42.263	383010000	15	25.1744	25.607	24.85	NaN	7	3	4	0	0.507669	0.757012	0.713108	Q9C005	Q9C005	Protein dpy-30 homolog	DPY30	3476	sp|Q9C005|DPY30_HUMAN Protein dpy-30 homolog OS=Homo sapiens OX=9606 GN=DPY30 PE=1 SV=1
NaN	NaN	NaN	25.8048	24.6983	26.9102	26.0694	26.6	NaN	26.2077	27.8523	26.7698	27.419	26.8689	NaN			7	7	7	35.4	35.4	35.4	43.166	0	30.287	572600000	22	26.5201	25.2515	26.4469	27.2275	10	2	4	4	0.0544293	-1.19531	-2.69404	Q9UBR1;Q6AHZ8	Q9UBR1	Beta-ureidopropionase	UPB1	3737	sp|Q9UBR1|BUP1_HUMAN Beta-ureidopropionase OS=Homo sapiens OX=9606 GN=UPB1 PE=1 SV=1
NaN	24.6289	NaN	NaN	26.3157	27.2384	NaN	25.8268	26.5319	25.4623	26.0497	26.7722	26.2292	26.6123	NaN			6	6	6	22.5	22.5	22.5	43.104	0	16.702	525020000	25	26.1667	25.4723	26.2649	26.4158	10	2	4	4	0.36922	-0.792544	-1.01096	Q08431;H0YKS8;A0A087WUV5	Q08431;H0YKS8	Lactadherin;Lactadherin short form;Medin	MFGE8	2534	sp|Q08431|MFGM_HUMAN Lactadherin OS=Homo sapiens OX=9606 GN=MFGE8 PE=1 SV=3;tr|H0YKS8|H0YKS8_HUMAN Lactadherin (Fragment) OS=Homo sapiens OX=9606 GN=MFGE8 PE=1 SV=1
24.7554	24.7152	NaN	NaN	NaN	NaN	24.9614	25.0775	25.6159	25.0662	NaN	NaN	NaN	NaN	NaN			4	4	4	8.6	8.6	8.6	70.737	0	7.9079	230430000	18	25.0319	24.7353	25.1802	NaN	6	2	4	0	0.115152	-0.444945	-2.00731	Q969Z0;C9J7P5;C9IZN7;H7C4R5	Q969Z0;C9J7P5;C9IZN7	Protein TBRG4	TBRG4	3222	sp|Q969Z0|FAKD4_HUMAN FAST kinase domain-containing protein 4 OS=Homo sapiens OX=9606 GN=TBRG4 PE=1 SV=1;tr|C9J7P5|C9J7P5_HUMAN FAST kinase domain-containing protein 4 (Fragment) OS=Homo sapiens OX=9606 GN=TBRG4 PE=1 SV=1;tr|C9IZN7|C9IZN7_HUMAN FAST kinase
NaN	NaN	24.1044	24.2631	NaN	NaN	24.1671	24.5294	25.1446	24.4596	25.4999	NaN	25.1807	25.4416	NaN			7	7	7	6.6	6.6	6.6	140.49	0	16.618	342070000	25	24.7545	24.1838	24.5752	25.3741	9	2	4	3	0.277763	-0.391434	-1.25511	K7EIG1;I3L2B0;A0A494C0R8;O75153	K7EIG1;I3L2B0;A0A494C0R8;O75153	Clustered mitochondria protein homolog	CLUH	389	tr|K7EIG1|K7EIG1_HUMAN Clustered mitochondria protein homolog (Fragment) OS=Homo sapiens OX=9606 GN=CLUH PE=1 SV=2;tr|I3L2B0|I3L2B0_HUMAN Clustered mitochondria protein homolog OS=Homo sapiens OX=9606 GN=CLUH PE=1 SV=3;tr|A0A494C0R8|A0A494C0R8_HUMAN Cluste
25.9321	NaN	NaN	NaN	25.3686	25.9376	25.9688	NaN	25.7103	26.0612	NaN	NaN	NaN	NaN	NaN			2	2	2	31.4	31.4	31.4	11.805	0	9.6983	345840000	15	25.8298	25.6504	25.9195	NaN	6	2	4	0	0.260656	-0.269083	-1.30904	A0A5F9YFS9;C9JBL1;Q9Y6A9	A0A5F9YFS9;C9JBL1;Q9Y6A9	Signal peptidase complex subunit 1	SPCS1	400	tr|A0A5F9YFS9|A0A5F9YFS9_HUMAN Microsomal signal peptidase 12 kDa subunit OS=Homo sapiens OX=9606 GN=SPCS1 PE=1 SV=1;tr|C9JBL1|C9JBL1_HUMAN Microsomal signal peptidase 12 kDa subunit OS=Homo sapiens OX=9606 GN=SPCS1 PE=1 SV=1;sp|Q9Y6A9|SPCS1_HUMAN Signal p
24.6403	25.257	NaN	NaN	NaN	NaN	24.6369	25.0888	26.3047	24.8146	NaN	NaN	NaN	NaN	NaN			7	7	7	17.7	17.7	17.7	77.843	0	23.362	377950000	14	25.1237	24.9486	25.2112	NaN	6	2	4	0	0.681781	-0.262591	-0.44133	A0A087WZ13;E9PAU2;Q8IY67;K7EKR9;K7EQG2	A0A087WZ13;E9PAU2;Q8IY67	Ribonucleoprotein PTB-binding 1	RAVER1	74	tr|A0A087WZ13|A0A087WZ13_HUMAN Ribonucleoprotein PTB-binding 1 OS=Homo sapiens OX=9606 GN=RAVER1 PE=1 SV=1;tr|E9PAU2|E9PAU2_HUMAN Ribonucleoprotein PTB-binding 1 OS=Homo sapiens OX=9606 GN=RAVER1 PE=1 SV=1;sp|Q8IY67|RAVR1_HUMAN Ribonucleoprotein PTB-bindin
24.2658	NaN	24.7372	NaN	NaN	NaN	25.0008	24.852	24.6121	24.5534	NaN	NaN	NaN	NaN	NaN			3	3	3	8.1	8.1	8.1	51.4	0	5.0315	172560000	9	24.6702	24.5015	24.7546	NaN	6	2	4	0	0.300472	-0.253091	-1.18823	Q6YP21;A0A0A0MRN7	Q6YP21;A0A0A0MRN7	Kynurenine--oxoglutarate transaminase 3	CCBL2	2932	sp|Q6YP21|KAT3_HUMAN Kynurenine--oxoglutarate transaminase 3 OS=Homo sapiens OX=9606 GN=KYAT3 PE=1 SV=1;tr|A0A0A0MRN7|A0A0A0MRN7_HUMAN Cysteine-S-conjugate beta-lyase 2 (Fragment) OS=Homo sapiens OX=9606 GN=KYAT3 PE=1 SV=1
25.8942	NaN	NaN	NaN	25.9881	26.1242	26.0345	NaN	26.5296	25.9755	26.5354	25.8388	26.271	26.2045	NaN			8	8	8	34.3	34.3	34.3	37.375	0	23.796	549780000	32	26.1396	25.9411	26.166	26.2125	10	2	4	4	0.301517	-0.224836	-1.18526	Q9UJ70;H7C3G9;C9JEV6;H7C1L7;H0YEB7;H7C286;H0YE82;H0YF44;E9PPU6;H0YC94	Q9UJ70;H7C3G9;C9JEV6;H7C1L7;H0YEB7;H7C286	N-acetyl-D-glucosamine kinase	NAGK	3781	sp|Q9UJ70|NAGK_HUMAN N-acetyl-D-glucosamine kinase OS=Homo sapiens OX=9606 GN=NAGK PE=1 SV=4;tr|H7C3G9|H7C3G9_HUMAN GlcNAc kinase OS=Homo sapiens OX=9606 GN=NAGK PE=1 SV=2;tr|C9JEV6|C9JEV6_HUMAN GlcNAc kinase OS=Homo sapiens OX=9606 GN=NAGK PE=1 SV=3;tr|H7
24.2177	24.6499	NaN	NaN	NaN	25.5526	24.1248	NaN	24.3815	24.3053	NaN	NaN	NaN	NaN	NaN			2	2	2	15.8	15.8	15.8	32.156	0	17.476	184180000	16	24.5386	24.4338	24.5911	NaN	6	2	4	0	0.77111	-0.157263	-0.311317	O14494	O14494	Lipid phosphate phosphohydrolase 1	PPAP2A	1327	sp|O14494|PLPP1_HUMAN Phospholipid phosphatase 1 OS=Homo sapiens OX=9606 GN=PLPP1 PE=1 SV=1
24.617	NaN	NaN	NaN	24.5941	NaN	25.1226	24.8569	24.1777	24.6843	NaN	NaN	NaN	NaN	NaN			4	4	4	15.5	15.5	15.5	54.271	0	10.405	238890000	11	24.6754	24.6056	24.7104	NaN	6	2	4	0	0.743388	-0.104824	-0.350866	Q969S3	Q969S3	Zinc finger protein 622	ZNF622	3217	sp|Q969S3|ZN622_HUMAN Zinc finger protein 622 OS=Homo sapiens OX=9606 GN=ZNF622 PE=1 SV=1
25.6336	NaN	NaN	NaN	25.5336	25.6962	25.1456	25.9991	NaN	25.8453	NaN	NaN	NaN	NaN	NaN			7	7	7	19.6	19.6	19.6	58.476	0	121.07	553490000	24	25.6422	25.5836	25.6716	NaN	6	2	4	0	0.769415	-0.0880089	-0.313717	O60825;H0Y483;I1Z9G3;Q4VBA9;F2Z2I2;Q66S35;Q5W015;Q5VX20;A0A1W2PR17;Q16877;P16118;Q16875	O60825	6-phosphofructo-2-kinase/fructose-2,6-bisphosphatase 2;6-phosphofructo-2-kinase;Fructose-2,6-bisphosphatase	PFKFB2	1462	sp|O60825|F262_HUMAN 6-phosphofructo-2-kinase/fructose-2,6-bisphosphatase 2 OS=Homo sapiens OX=9606 GN=PFKFB2 PE=1 SV=2
25.481	25.5188	NaN	NaN	NaN	25.5694	25.7021	NaN	25.4252	25.5871	25.5194	25.5257	25.5295	25.7255	NaN			3	2	2	21.6	13.7	13.7	23.399	0	7.6318	317800000	13	25.5584	25.4999	25.5709	25.575	10	2	4	4	0.454975	-0.0710754	-0.82649	P62070;E9PK85	P62070;E9PK85	Ras-related protein R-Ras2	RRAS2	2373	sp|P62070|RRAS2_HUMAN Ras-related protein R-Ras2 OS=Homo sapiens OX=9606 GN=RRAS2 PE=1 SV=1;tr|E9PK85|E9PK85_HUMAN Ras-related protein R-Ras2 (Fragment) OS=Homo sapiens OX=9606 GN=RRAS2 PE=1 SV=1
NaN	NaN	23.9835	24.0362	NaN	24.0504	24.1499	23.9693	NaN	24.1101	NaN	24.3065	23.8754	NaN	NaN			3	3	3	6.8	6.8	6.8	71.996	0	7.9036	138900000	13	24.0602	24.0099	24.0699	24.0909	8	2	4	2	0.380988	-0.0600815	-0.983628	Q99543;C9IZ83;H7C3L7;F2Z3H0;F2Z3N9	Q99543;C9IZ83;H7C3L7	DnaJ homolog subfamily C member 2;DnaJ homolog subfamily C member 2, N-terminally processed	DNAJC2	3355	sp|Q99543|DNJC2_HUMAN DnaJ homolog subfamily C member 2 OS=Homo sapiens OX=9606 GN=DNAJC2 PE=1 SV=4;tr|C9IZ83|C9IZ83_HUMAN DnaJ homolog subfamily C member 2 (Fragment) OS=Homo sapiens OX=9606 GN=DNAJC2 PE=1 SV=1;tr|H7C3L7|H7C3L7_HUMAN DnaJ homolog subfamil
25.1363	NaN	24.9166	NaN	NaN	NaN	25.0642	25.3966	25.0133	24.8404	NaN	NaN	NaN	NaN	NaN			8	8	8	6.5	6.5	6.5	184.64	0	58.895	271690000	15	25.0612	25.0264	25.0786	NaN	6	2	4	0	0.79389	-0.0522137	-0.279259	P51532;Q9HBD4;A0A0A0MT49;A0A2R8Y4P4;A0A2R8Y7S2;A0A2R8YGG3;A0A2R8YGP5;A0A2R8YF58;A0A2R8YG32;A0A2R8Y440;A0A2R8Y7F3;A0A2R8Y6N0;A0A2R8YF80;A0A2R8Y7Y7;A0A2R8Y526;A0A2R8Y4C5;A0A2R8Y6V2;A0A2R8YDA1;A0A2R8Y523;A0A2R8YCY3;A0A2R8YFV8;A0A0U1RQZ9;A0A2R8Y4R6;P51531;A0A0U1RQE1;A0A2R8Y5K3;K7EQF0;F6VDE0;A0A2R8YFK5;K7EP28	P51532;Q9HBD4;A0A0A0MT49;A0A2R8Y4P4;A0A2R8Y7S2;A0A2R8YGG3;A0A2R8YGP5;A0A2R8YF58;A0A2R8YG32;A0A2R8Y440;A0A2R8Y7F3;A0A2R8Y6N0;A0A2R8YF80;A0A2R8Y7Y7;A0A2R8Y526;A0A2R8Y4C5;A0A2R8Y6V2;A0A2R8YDA1;A0A2R8Y523	Transcription activator BRG1	SMARCA4	157	sp|P51532|SMCA4_HUMAN Transcription activator BRG1 OS=Homo sapiens OX=9606 GN=SMARCA4 PE=1 SV=2;tr|Q9HBD4|Q9HBD4_HUMAN SMARCA4 isoform 2 OS=Homo sapiens OX=9606 GN=SMARCA4 PE=1 SV=1;tr|A0A0A0MT49|A0A0A0MT49_HUMAN Transcription activator BRG1 OS=Homo sapien
25.4148	NaN	NaN	NaN	25.3453	25.579	25.2302	25.2981	NaN	25.3483	NaN	25.3162	25.4122	25.092	NaN			7	7	7	14.1	14.1	14.1	78.549	0	15.876	484610000	19	25.3373	25.3801	25.3639	25.2734	9	2	4	3	0.895523	0.0161519	0.13987	Q96EY7;B8ZZQ4;F8WE76	Q96EY7	Pentatricopeptide repeat domain-containing protein 3, mitochondrial	PTCD3	3266	sp|Q96EY7|PTCD3_HUMAN Pentatricopeptide repeat domain-containing protein 3, mitochondrial OS=Homo sapiens OX=9606 GN=PTCD3 PE=1 SV=3
25.3165	25.3749	NaN	NaN	NaN	25.1219	25.301	NaN	25.5792	25.3004	NaN	NaN	NaN	NaN	NaN			9	9	9	16	16	16	89.034	0	36.429	417420000	14	25.3323	25.3457	25.3256	NaN	6	2	4	0	0.895204	0.0200324	0.1403	Q12788;J3KNP2;A0A087WYP7	Q12788;J3KNP2	Transducin beta-like protein 3	TBL3	2553	sp|Q12788|TBL3_HUMAN Transducin beta-like protein 3 OS=Homo sapiens OX=9606 GN=TBL3 PE=1 SV=2;tr|J3KNP2|J3KNP2_HUMAN Transducin beta-like protein 3 (Fragment) OS=Homo sapiens OX=9606 GN=TBL3 PE=1 SV=1
25.0727	NaN	24.5665	NaN	NaN	NaN	25.1319	24.5692	24.412	24.9951	NaN	NaN	NaN	NaN	NaN			2	2	2	74.3	74.3	74.3	4.1198	0	6.877	260280000	15	24.7913	24.8196	24.7771	NaN	6	2	4	0	0.89387	0.0425429	0.142101	A0A3B3ISR8;A0A0D9SGK2;Q93096;E9PMY3;E9PML8;E9PJC0;E9PRR9;Q12974	A0A3B3ISR8;A0A0D9SGK2;Q93096;E9PMY3;E9PML8;E9PJC0;E9PRR9;Q12974	Protein tyrosine phosphatase type IVA 1;Protein tyrosine phosphatase type IVA 2	PTP4A1;PTP4A2	222	tr|A0A3B3ISR8|A0A3B3ISR8_HUMAN Protein tyrosine phosphatase type IVA 1 (Fragment) OS=Homo sapiens OX=9606 GN=PTP4A1 PE=1 SV=1;tr|A0A0D9SGK2|A0A0D9SGK2_HUMAN Protein tyrosine phosphatase type IVA 1 OS=Homo sapiens OX=9606 GN=PTP4A1 PE=1 SV=1;sp|Q93096|TP4A1
25.4437	25.5537	NaN	NaN	NaN	NaN	25.521	25.2113	25.4001	25.5247	NaN	24.9863	25.1214	NaN	NaN			6	6	6	22.6	22.6	22.6	44.561	0	61.514	412870000	21	25.3453	25.4987	25.4143	25.0539	8	2	4	2	0.505017	0.0844312	0.731508	Q14318;M0R2K9;M0R1Q0;M0R1S6;U3KQ64;M0R2Q6;U3KQI1;A0A0A0MTJ1	Q14318;M0R2K9	Peptidyl-prolyl cis-trans isomerase FKBP8;Peptidyl-prolyl cis-trans isomerase	FKBP8	2660	sp|Q14318|FKBP8_HUMAN Peptidyl-prolyl cis-trans isomerase FKBP8 OS=Homo sapiens OX=9606 GN=FKBP8 PE=1 SV=2;tr|M0R2K9|M0R2K9_HUMAN Peptidylprolyl isomerase (Fragment) OS=Homo sapiens OX=9606 GN=FKBP8 PE=1 SV=2
25.592	NaN	NaN	NaN	26.2065	26.2519	25.5674	25.7236	NaN	25.3809	NaN	26.4966	26.414	26.2185	NaN			5	5	5	60.3	60.3	60.3	13.607	0	68.922	482930000	21	25.9835	25.8992	25.7309	26.3764	9	2	4	3	0.644689	0.168319	0.497892	K7EM18;P41567;O60739;K7EQP2	K7EM18;P41567;O60739	Eukaryotic translation initiation factor 1;Eukaryotic translation initiation factor 1b	EIF1;EIF1B	1245	tr|K7EM18|K7EM18_HUMAN Eukaryotic translation initiation factor 1 OS=Homo sapiens OX=9606 GN=EIF1 PE=1 SV=1;sp|P41567|EIF1_HUMAN Eukaryotic translation initiation factor 1 OS=Homo sapiens OX=9606 GN=EIF1 PE=1 SV=1;sp|O60739|EIF1B_HUMAN Eukaryotic translati
25.4482	NaN	24.4814	NaN	NaN	23.8393	24.8841	24.7895	NaN	25.0662	NaN	NaN	NaN	NaN	NaN			5	5	5	11.2	11.2	11.2	52.832	0	18.159	421250000	19	24.7515	24.9648	24.6448	NaN	6	2	4	0	0.562351	0.319985	0.630912	H3BR35;P15170;H3BSV8;Q8IYD1	H3BR35;P15170;H3BSV8;Q8IYD1	Eukaryotic peptide chain release factor GTP-binding subunit ERF3A;Eukaryotic peptide chain release factor GTP-binding subunit ERF3B	GSPT1;GSPT2	1117	tr|H3BR35|H3BR35_HUMAN Eukaryotic peptide chain release factor GTP-binding subunit ERF3A (Fragment) OS=Homo sapiens OX=9606 GN=GSPT1 PE=1 SV=1;sp|P15170|ERF3A_HUMAN Eukaryotic peptide chain release factor GTP-binding subunit ERF3A OS=Homo sapiens OX=9606 G
24.6533	NaN	25.4843	NaN	NaN	NaN	24.4	24.9632	24.6927	24.4375	NaN	NaN	NaN	NaN	NaN			5	5	5	16.1	16.1	16.1	55.704	0	46.779	244790000	17	24.7718	25.0688	24.6234	NaN	6	2	4	0	0.23772	0.445439	1.38702	P61011;G3V4F7;G3V346;A0A0D9SFN7;G3V3L9;G3V480	P61011;G3V4F7	Signal recognition particle 54 kDa protein	SRP54	2342	sp|P61011|SRP54_HUMAN Signal recognition particle 54 kDa protein OS=Homo sapiens OX=9606 GN=SRP54 PE=1 SV=1;tr|G3V4F7|G3V4F7_HUMAN Signal recognition particle 54 kDa protein OS=Homo sapiens OX=9606 GN=SRP54 PE=1 SV=1
NaN	NaN	24.3539	NaN	NaN	26.3934	25.6532	26.0779	NaN	25.2082	27.1148	26.2527	25.3309	25.6312	NaN			5	4	4	13	11.1	11.1	65.202	0	11.368	474480000	17	25.7796	24.3539	25.8332	26.0824	9	1	4	4	1	-1.47932	0	Q9NQ94;F8W9F8;Q5T0W7	Q9NQ94;F8W9F8	APOBEC1 complementation factor	A1CF	1002	sp|Q9NQ94|A1CF_HUMAN APOBEC1 complementation factor OS=Homo sapiens OX=9606 GN=A1CF PE=1 SV=1;tr|F8W9F8|F8W9F8_HUMAN APOBEC1 complementation factor OS=Homo sapiens OX=9606 GN=A1CF PE=1 SV=2
24.0618	NaN	NaN	NaN	NaN	25.0144	25.5024	25.5228	NaN	25.1919	NaN	NaN	NaN	NaN	NaN			3	3	3	12.2	12.2	12.2	37.998	0	9.6714	317490000	13	25.0587	24.0618	25.3079	NaN	5	1	4	0	1	-1.24614	0	Q6P4A7	Q6P4A7	Sideroflexin-4	SFXN4	2906	sp|Q6P4A7|SFXN4_HUMAN Sideroflexin-4 OS=Homo sapiens OX=9606 GN=SFXN4 PE=1 SV=1
24.5801	NaN	NaN	NaN	NaN	25.5342	25.0425	25.3485	NaN	24.9875	NaN	NaN	NaN	NaN	NaN			4	4	4	7.8	7.8	7.8	78.839	0	13.801	311820000	14	25.0986	24.5801	25.2282	NaN	5	1	4	0	1	-0.64804	0	P52888;K7EP46;K7EIK4;K7EKB6;K7EL32;K7EL02	P52888;K7EP46	Thimet oligopeptidase	THOP1	2267	sp|P52888|THOP1_HUMAN Thimet oligopeptidase OS=Homo sapiens OX=9606 GN=THOP1 PE=1 SV=2;tr|K7EP46|K7EP46_HUMAN Thimet oligopeptidase OS=Homo sapiens OX=9606 GN=THOP1 PE=1 SV=1
25.6914	NaN	NaN	NaN	NaN	27.0707	26.2766	25.8716	NaN	25.5185	NaN	26.7477	NaN	NaN	NaN			4	4	4	28.3	28.3	28.3	22.782	0	53.373	488130000	15	26.1961	25.6914	26.1843	26.7477	6	1	4	1	1	-0.492977	0	P04792;F8WE04;C9J3N8	P04792;F8WE04	Heat shock protein beta-1	HSPB1	1654	sp|P04792|HSPB1_HUMAN Heat shock protein beta-1 OS=Homo sapiens OX=9606 GN=HSPB1 PE=1 SV=2;tr|F8WE04|F8WE04_HUMAN Heat shock protein beta-1 OS=Homo sapiens OX=9606 GN=HSPB1 PE=1 SV=1
NaN	NaN	NaN	NaN	24.9767	26.1524	NaN	24.709	25.6425	25.3581	NaN	26.544	26.1431	26.1505	NaN			13	7	7	14.4	8	8	130.48	0	19.396	413650000	26	25.7095	24.9767	25.4655	26.2792	8	1	4	3	1	-0.488741	0	E9PCY5;Q02880	E9PCY5;Q02880	DNA topoisomerase 2;DNA topoisomerase 2-beta	TOP2B	840	tr|E9PCY5|E9PCY5_HUMAN DNA topoisomerase 2 (Fragment) OS=Homo sapiens OX=9606 GN=TOP2B PE=1 SV=1;sp|Q02880|TOP2B_HUMAN DNA topoisomerase 2-beta OS=Homo sapiens OX=9606 GN=TOP2B PE=1 SV=3
24.1447	NaN	NaN	NaN	NaN	NaN	23.9137	25.3179	24.591	24.2491	NaN	NaN	NaN	NaN	NaN			3	3	3	12.5	12.5	12.5	32.772	0	12.788	169230000	9	24.4433	24.1447	24.5179	NaN	5	1	4	0	1	-0.373233	0	Q8N5M1;C9J2Q2;K7ELC1	Q8N5M1;C9J2Q2	ATP synthase mitochondrial F1 complex assembly factor 2	ATPAF2	3057	sp|Q8N5M1|ATPF2_HUMAN ATP synthase mitochondrial F1 complex assembly factor 2 OS=Homo sapiens OX=9606 GN=ATPAF2 PE=1 SV=1;tr|C9J2Q2|C9J2Q2_HUMAN ATP synthase mitochondrial F1 complex assembly factor 2 (Fragment) OS=Homo sapiens OX=9606 GN=ATPAF2 PE=1 SV=1
NaN	25.1614	NaN	NaN	NaN	25.4257	NaN	25.246	25.8223	25.3778	NaN	NaN	NaN	NaN	NaN			9	9	9	10.4	10.4	10.4	122.56	0	19.764	629170000	11	25.4067	25.1614	25.468	NaN	5	1	4	0	1	-0.306581	0	Q14139;B7Z7P0	Q14139;B7Z7P0	Ubiquitin conjugation factor E4 A	UBE4A	2646	sp|Q14139|UBE4A_HUMAN Ubiquitin conjugation factor E4 A OS=Homo sapiens OX=9606 GN=UBE4A PE=1 SV=2;tr|B7Z7P0|B7Z7P0_HUMAN Ubiquitin conjugation factor E4 A OS=Homo sapiens OX=9606 GN=UBE4A PE=1 SV=1
25.2427	NaN	NaN	NaN	NaN	25.8203	25.482	25.3018	NaN	25.5658	NaN	25.9878	NaN	24.9812	NaN			8	8	8	13.8	13.8	13.8	83.549	0	16.608	482350000	17	25.4831	25.2427	25.5425	25.4845	7	1	4	2	1	-0.299743	0	Q02809;Q5JXB8;Q5JXB7	Q02809	Procollagen-lysine,2-oxoglutarate 5-dioxygenase 1	PLOD1	2498	sp|Q02809|PLOD1_HUMAN Procollagen-lysine,2-oxoglutarate 5-dioxygenase 1 OS=Homo sapiens OX=9606 GN=PLOD1 PE=1 SV=2
25.24	NaN	NaN	NaN	NaN	NaN	25.5666	25.3006	25.6477	25.4598	NaN	25.2893	25.5905	25.5065	NaN			4	4	4	17.1	17.1	17.1	26.383	0	21.095	630080000	18	25.4501	25.24	25.4937	25.4621	8	1	4	3	1	-0.253661	0	Q9NPD3;E9PPI9;E9PI41	Q9NPD3;E9PPI9	Exosome complex component RRP41	EXOSC4	3601	sp|Q9NPD3|EXOS4_HUMAN Exosome complex component RRP41 OS=Homo sapiens OX=9606 GN=EXOSC4 PE=1 SV=3;tr|E9PPI9|E9PPI9_HUMAN Exosome complex component RRP41 OS=Homo sapiens OX=9606 GN=EXOSC4 PE=1 SV=1
24.966	NaN	NaN	NaN	NaN	24.8138	24.9506	NaN	25.7594	25.2633	NaN	NaN	NaN	NaN	NaN			6	6	6	15.9	15.9	15.9	45.834	0	17.77	357260000	18	25.1506	24.966	25.1968	NaN	5	1	4	0	1	-0.230749	0	P82933	P82933	28S ribosomal protein S9, mitochondrial	MRPS9	2460	sp|P82933|RT09_HUMAN 28S ribosomal protein S9, mitochondrial OS=Homo sapiens OX=9606 GN=MRPS9 PE=1 SV=2
24.7679	NaN	NaN	NaN	NaN	24.6689	24.9983	25.0861	NaN	25.1798	NaN	NaN	24.9701	24.6164	NaN			5	5	5	16.2	16.2	16.2	57.958	0	54.785	358360000	18	24.8982	24.7679	24.9833	24.7933	7	1	4	2	1	-0.215323	0	U3KQS6;A0A0A0MQU7;F5H0K0;A0A0A0MTK8;P20823;H0YND5;E0YMI9;A0A087WYP0	U3KQS6;A0A0A0MQU7;F5H0K0;A0A0A0MTK8;P20823;H0YND5;E0YMI9;A0A087WYP0	Hepatocyte nuclear factor 1-alpha	HNF1A	118	tr|U3KQS6|U3KQS6_HUMAN Hepatocyte nuclear factor 1-alpha OS=Homo sapiens OX=9606 GN=HNF1A PE=1 SV=1;tr|A0A0A0MQU7|A0A0A0MQU7_HUMAN Hepatocyte nuclear factor 1-alpha OS=Homo sapiens OX=9606 GN=HNF1A PE=1 SV=1;tr|F5H0K0|F5H0K0_HUMAN Hepatocyte nuclear factor
NaN	NaN	25.4347	NaN	NaN	25.7592	25.4404	25.4897	NaN	25.5365	NaN	NaN	NaN	NaN	NaN			3	3	3	10.2	10.2	10.2	52.545	0	20.344	340410000	10	25.5321	25.4347	25.5565	NaN	5	1	4	0	1	-0.121763	0	O75306	O75306	NADH dehydrogenase [ubiquinone] iron-sulfur protein 2, mitochondrial	NDUFS2	1480	sp|O75306|NDUS2_HUMAN NADH dehydrogenase [ubiquinone] iron-sulfur protein 2, mitochondrial OS=Homo sapiens OX=9606 GN=NDUFS2 PE=1 SV=2
25.3314	NaN	NaN	NaN	NaN	25.1811	25.559	25.5284	NaN	25.4718	NaN	NaN	NaN	NaN	NaN			9	7	7	21.1	17	17	59.069	0	36.195	447930000	21	25.4143	25.3314	25.435	NaN	5	1	4	0	1	-0.103619	0	Q13596;H0YK42;H0YK43	Q13596;H0YK42	Sorting nexin-1	SNX1	2622	sp|Q13596|SNX1_HUMAN Sorting nexin-1 OS=Homo sapiens OX=9606 GN=SNX1 PE=1 SV=3;tr|H0YK42|H0YK42_HUMAN Sorting nexin-1 OS=Homo sapiens OX=9606 GN=SNX1 PE=1 SV=1
25.624	NaN	NaN	NaN	NaN	NaN	25.5654	25.7149	25.6646	25.9638	NaN	NaN	NaN	NaN	NaN			2	2	2	40.5	40.5	40.5	8.2432	0	5.3788	385230000	9	25.7065	25.624	25.7272	NaN	5	1	4	0	1	-0.103166	0	H7C4Q5;C9JY28;C9JRX8;F5H189;Q9HD34	H7C4Q5;C9JY28;C9JRX8;F5H189;Q9HD34	LYR motif-containing protein 4	LYRM4	1168	tr|H7C4Q5|H7C4Q5_HUMAN LYR motif-containing protein 4 (Fragment) OS=Homo sapiens OX=9606 GN=LYRM4 PE=1 SV=2;tr|C9JY28|C9JY28_HUMAN LYR motif-containing protein 4 OS=Homo sapiens OX=9606 GN=LYRM4 PE=1 SV=1;tr|C9JRX8|C9JRX8_HUMAN LYR motif-containing protein
24.9925	NaN	NaN	NaN	NaN	NaN	24.7977	24.8597	25.2742	25.107	NaN	NaN	NaN	NaN	NaN			6	6	6	8	8	8	107.34	0	29.05	306540000	15	25.0062	24.9925	25.0097	NaN	5	1	4	0	1	-0.0172005	0	Q5JTZ9	Q5JTZ9	Alanine--tRNA ligase, mitochondrial	AARS2	2827	sp|Q5JTZ9|SYAM_HUMAN Alanine--tRNA ligase, mitochondrial OS=Homo sapiens OX=9606 GN=AARS2 PE=1 SV=1
26.1321	NaN	NaN	NaN	NaN	NaN	26.2694	26.275	25.8372	25.7183	NaN	NaN	NaN	NaN	NaN			3	3	3	9.2	9.2	9.2	81.798	0	5.4723	371380000	8	26.0464	26.1321	26.025	NaN	5	1	4	0	1	0.107103	0	Q8IYI6	Q8IYI6	Exocyst complex component 8	EXOC8	3026	sp|Q8IYI6|EXOC8_HUMAN Exocyst complex component 8 OS=Homo sapiens OX=9606 GN=EXOC8 PE=1 SV=2
24.3242	NaN	NaN	NaN	NaN	24.1776	24.2876	24.3161	NaN	24.0102	NaN	NaN	24.4749	25.5778	NaN			4	4	4	13.3	13.3	13.3	50.054	0	8.6969	147800000	13	24.4526	24.3242	24.1979	25.0263	7	1	4	2	1	0.126369	0	G3V0I5;P49821;B4DE93;E9PPS5;H0YD04;H0YE81;E9PLC6;E9PPR0;E9PQP1;E9PMX3	G3V0I5;P49821;B4DE93	NADH dehydrogenase [ubiquinone] flavoprotein 1, mitochondrial	NDUFV1	1012	tr|G3V0I5|G3V0I5_HUMAN NADH dehydrogenase [ubiquinone] flavoprotein 1, mitochondrial OS=Homo sapiens OX=9606 GN=NDUFV1 PE=1 SV=1;sp|P49821|NDUV1_HUMAN NADH dehydrogenase [ubiquinone] flavoprotein 1, mitochondrial OS=Homo sapiens OX=9606 GN=NDUFV1 PE=1 SV=4
24.9565	NaN	NaN	NaN	NaN	24.9727	24.5547	24.2491	NaN	25.2753	NaN	NaN	NaN	NaN	NaN			5	5	5	15.1	15.1	15.1	55.799	0	24.685	227510000	14	24.8017	24.9565	24.763	NaN	5	1	4	0	1	0.193548	0	Q9UJA5	Q9UJA5	tRNA (adenine(58)-N(1))-methyltransferase non-catalytic subunit TRM6	TRMT6	3783	sp|Q9UJA5|TRM6_HUMAN tRNA (adenine(58)-N(1))-methyltransferase non-catalytic subunit TRM6 OS=Homo sapiens OX=9606 GN=TRMT6 PE=1 SV=1
25.9886	NaN	NaN	NaN	NaN	NaN	26.2574	25.7546	25.7364	25.4042	NaN	25.9184	NaN	26.0041	NaN			3	3	3	18.2	18.2	18.2	37.124	0	117.45	518970000	20	25.8662	25.9886	25.7881	25.9612	7	1	4	2	1	0.200491	0	Q8TD22;F8WBH6;C9JIV5;B8ZZJ6	Q8TD22	Sideroflexin-5	SFXN5	3124	sp|Q8TD22|SFXN5_HUMAN Sideroflexin-5 OS=Homo sapiens OX=9606 GN=SFXN5 PE=1 SV=1
25.4188	NaN	NaN	NaN	NaN	25.257	24.594	NaN	25.2904	25.1376	NaN	NaN	NaN	NaN	NaN			2	2	2	6.3	6.3	6.3	55.299	0	11.164	215520000	7	25.1396	25.4188	25.0698	NaN	5	1	4	0	1	0.349078	0	Q9Y6M5	Q9Y6M5	Zinc transporter 1	SLC30A1	3954	sp|Q9Y6M5|ZNT1_HUMAN Zinc transporter 1 OS=Homo sapiens OX=9606 GN=SLC30A1 PE=1 SV=3
24.4253	NaN	NaN	NaN	NaN	24.0116	23.6797	24.0892	NaN	24.2755	NaN	NaN	NaN	NaN	NaN			2	2	2	5.1	5.1	5.1	68.107	0	7.6393	146390000	11	24.0963	24.4253	24.014	NaN	5	1	4	0	1	0.411347	0	Q8TB96;F5GXC5;H3BUJ1	Q8TB96;F5GXC5;H3BUJ1	T-cell immunomodulatory protein	ITFG1	925	sp|Q8TB96|TIP_HUMAN T-cell immunomodulatory protein OS=Homo sapiens OX=9606 GN=ITFG1 PE=1 SV=1;tr|F5GXC5|F5GXC5_HUMAN T-cell immunomodulatory protein OS=Homo sapiens OX=9606 GN=ITFG1 PE=1 SV=1;tr|H3BUJ1|H3BUJ1_HUMAN T-cell immunomodulatory protein (Fragmen
25.721	NaN	NaN	NaN	NaN	NaN	25.2613	25.2849	24.7658	25.0338	NaN	NaN	NaN	NaN	NaN			6	6	6	24.1	24.1	24.1	52.891	0	162.39	306070000	13	25.2134	25.721	25.0864	NaN	5	1	4	0	1	0.634603	0	P50579;F8VRR3;F8VQZ7;G3V1U3;F8VSC4;F8VY03;F8VZX9	P50579;F8VRR3;F8VQZ7;G3V1U3	Methionine aminopeptidase 2	METAP2	2231	sp|P50579|MAP2_HUMAN Methionine aminopeptidase 2 OS=Homo sapiens OX=9606 GN=METAP2 PE=1 SV=1;tr|F8VRR3|F8VRR3_HUMAN Methionine aminopeptidase 2 OS=Homo sapiens OX=9606 GN=METAP2 PE=1 SV=1;tr|F8VQZ7|F8VQZ7_HUMAN Methionine aminopeptidase 2 OS=Homo sapiens O
NaN	NaN	NaN	27.0699	NaN	26.0031	26.0998	26.1222	NaN	26.7674	26.7161	26.5969	26.7223	27.4133	NaN			9	4	4	25.6	14.5	14.5	55.364	0	24.441	470570000	18	26.6123	27.0699	26.2481	26.8622	9	1	4	4	1	0.821768	0	Q92769;H3BM24;E5RFI6;E5RJ04;E5RGV4;E5RHE7;E5RH52;E5RG37;E5RFP9;E5RK19	Q92769	Histone deacetylase 2	HDAC2	3191	sp|Q92769|HDAC2_HUMAN Histone deacetylase 2 OS=Homo sapiens OX=9606 GN=HDAC2 PE=1 SV=2
NaN	NaN	NaN	NaN	NaN	24.4344	24.1496	24.314	NaN	24.6303	NaN	NaN	NaN	NaN	NaN			10	10	7	10.9	10.9	8.9	160.9	0	48.514	349190000	20	24.3821	NaN	24.3821	NaN	4	0	4	0	1	NaN	0	O75116;E9PF63;D6REE7;Q14DU5;C9JFJ0	O75116;E9PF63;D6REE7	Rho-associated protein kinase 2	ROCK2	1473	sp|O75116|ROCK2_HUMAN Rho-associated protein kinase 2 OS=Homo sapiens OX=9606 GN=ROCK2 PE=1 SV=4;tr|E9PF63|E9PF63_HUMAN Rho-associated protein kinase 2 OS=Homo sapiens OX=9606 GN=ROCK2 PE=1 SV=1;tr|D6REE7|D6REE7_HUMAN Rho-associated protein kinase 2 OS=Hom
NaN	NaN	NaN	NaN	NaN	25.421	NaN	24.4638	26.95	25.3333	NaN	NaN	26.034	NaN	NaN			3	3	3	16.4	16.4	16.4	42.251	0	20.243	236230000	16	25.6404	NaN	25.5421	26.034	5	0	4	1	1	NaN	0	P14060;P26439;E9PRN7;Q5QP01	P14060;P26439	3 beta-hydroxysteroid dehydrogenase/Delta 5-->4-isomerase type 1;3-beta-hydroxy-Delta(5)-steroid dehydrogenase;Steroid Delta-isomerase;3 beta-hydroxysteroid dehydrogenase/Delta 5-->4-isomerase type 2;3-beta-hydroxy-Delta(5)-steroid dehydrogenase;Steroid Delta-isomerase	HSD3B1;HSD3B2	1815	sp|P14060|3BHS1_HUMAN 3 beta-hydroxysteroid dehydrogenase/Delta 5-->4-isomerase type 1 OS=Homo sapiens OX=9606 GN=HSD3B1 PE=1 SV=2;sp|P26439|3BHS2_HUMAN 3 beta-hydroxysteroid dehydrogenase/Delta 5-->4-isomerase type 2 OS=Homo sapiens OX=9606 GN=HSD3B2 PE=1
NaN	NaN	NaN	NaN	NaN	25.4458	24.3955	NaN	25.1642	25.5423	24.8113	26.1415	26.5306	26.2948	NaN			7	7	7	6.2	6.2	6.2	217.17	0	41.461	324770000	21	25.5408	NaN	25.1369	25.9446	8	0	4	4	1	NaN	0	P24928	P24928	DNA-directed RNA polymerase II subunit RPB1	POLR2A	1943	sp|P24928|RPB1_HUMAN DNA-directed RNA polymerase II subunit RPB1 OS=Homo sapiens OX=9606 GN=POLR2A PE=1 SV=2
NaN	NaN	NaN	NaN	NaN	25.9891	26.2158	26.2084	26.0941	NaN	NaN	25.8886	25.9746	NaN	NaN			3	3	1	10.7	10.7	4.8	41.59	0	12.491	479760000	18	26.0618	NaN	26.1268	25.9316	6	0	4	2	1	NaN	0	Q01085;E7ETJ9	Q01085	Nucleolysin TIAR	TIAL1	2480	sp|Q01085|TIAR_HUMAN Nucleolysin TIAR OS=Homo sapiens OX=9606 GN=TIAL1 PE=1 SV=1
27.1467	26.7204	25.4614	25.8518	27.3079	27.4806	27.2069	27.7009	27.4313	27.5842	27.2043	28.6759	28.3776	28.8691	NaN	+	3NT_Control	2	2	2	58.8	58.8	58.8	9.1175	0	16.974	2111100000	39	27.3585	26.4976	27.4808	28.2817	14	5	5	4	0.0292994	-0.983159	-2.64904	P61960;H0Y614	P61960;H0Y614	Ubiquitin-fold modifier 1	UFM1	2367	sp|P61960|UFM1_HUMAN Ubiquitin-fold modifier 1 OS=Homo sapiens OX=9606 GN=UFM1 PE=1 SV=1;tr|H0Y614|H0Y614_HUMAN Ubiquitin-fold modifier 1 (Fragment) OS=Homo sapiens OX=9606 GN=UFM1 PE=1 SV=1
26.6611	25.8831	26.5359	26.9453	26.5911	28.2574	26.4719	26.7992	27.8682	27.773	27.8489	28.1194	28.4042	28.1798	NaN	+	3NT_Control	93	93	93	26.6	26.6	26.6	532.4	0	323.31	7323700000	358	27.3099	26.5233	27.4339	28.1381	14	5	5	4	0.0443621	-0.910654	-2.38265	Q14204;A0A2R8Y706;A0A2R8Y5T0;A0A2R8Y6H2;A0A2R8YFZ7;A0A2R8Y542;A0A2R8Y6I5;H0YJ21;A0A2R8YGC7	Q14204	Cytoplasmic dynein 1 heavy chain 1	DYNC1H1	2652	sp|Q14204|DYHC1_HUMAN Cytoplasmic dynein 1 heavy chain 1 OS=Homo sapiens OX=9606 GN=DYNC1H1 PE=1 SV=5
24.9846	24.8073	24.1574	24.8982	24.3332	26.3634	25.1891	25.4292	25.2241	25.2587	NaN	26.1283	25.5782	25.6866	NaN	+	3NT_Control	8	8	8	29.9	29.9	29.9	50.322	0	48.498	564770000	38	25.2337	24.6361	25.4929	25.7977	13	5	5	3	0.014528	-0.856767	-3.10623	C9JEU5;C9JC84;P02679;C9JPQ9;C9JU00	C9JEU5;C9JC84;P02679	Fibrinogen gamma chain	FGG	602	tr|C9JEU5|C9JEU5_HUMAN Fibrinogen gamma chain OS=Homo sapiens OX=9606 GN=FGG PE=1 SV=1;tr|C9JC84|C9JC84_HUMAN Fibrinogen gamma chain OS=Homo sapiens OX=9606 GN=FGG PE=1 SV=1;sp|P02679|FIBG_HUMAN Fibrinogen gamma chain OS=Homo sapiens OX=9606 GN=FGG PE=1 SV
26.5989	25.6828	25.9162	26.5108	26.5591	27.3586	26.9578	26.99	26.3243	26.689	26.9725	26.7628	26.9007	26.8196	NaN	+	3NT_Control	4	4	4	25.9	25.9	25.9	19.27	0	40.943	1319000000	44	26.6459	26.2536	26.8639	26.8639	14	5	5	4	0.0441764	-0.610374	-2.38533	K7ELQ9;Q6UW68;K7EM09;K7EPR0;K7ER05;K7EJQ9;K7EMV9	K7ELQ9;Q6UW68;K7EM09;K7EPR0	Transmembrane protein 205	TMEM205	1242	tr|K7ELQ9|K7ELQ9_HUMAN Transmembrane protein 205 (Fragment) OS=Homo sapiens OX=9606 GN=TMEM205 PE=1 SV=1;sp|Q6UW68|TM205_HUMAN Transmembrane protein 205 OS=Homo sapiens OX=9606 GN=TMEM205 PE=1 SV=1;tr|K7EM09|K7EM09_HUMAN Transmembrane protein 205 (Fragment
26.0916	25.8536	26.0381	26.4286	26.3161	27.1736	26.2478	26.2244	26.9422	26.9061	26.251	27.2372	26.6875	27.0075	NaN	+	3NT_Control	44	31	28	28.9	20.9	19.4	229	0	246.64	3089300000	132	26.5289	26.1456	26.6988	26.7958	14	5	5	4	0.0358933	-0.553222	-2.51849	P35580;E7ERA5	P35580	Myosin-10	MYH10	2064	sp|P35580|MYH10_HUMAN Myosin-10 OS=Homo sapiens OX=9606 GN=MYH10 PE=1 SV=3
28.5451	28.2429	28.5284	28.4225	28.1187	29.5204	28.8163	28.8451	28.5672	28.6392	29.417	28.7744	29.294	29.0944	NaN	+	3NT_Control	8	8	8	29.1	29.1	29.1	61.247	0	125.44	12054000000	162	28.7732	28.3715	28.8776	29.1449	14	5	5	4	0.0275795	-0.506096	-2.68806	O14773;A0A2R8Y7U1;A0A2R8YGD1;A0A2R8YD45;A0A2R8Y7I4;A0A2R8YD72;A0A2R8YDY1;A0A2R8YE64	O14773;A0A2R8Y7U1;A0A2R8YGD1;A0A2R8YD45	Tripeptidyl-peptidase 1	TPP1	1339	sp|O14773|TPP1_HUMAN Tripeptidyl-peptidase 1 OS=Homo sapiens OX=9606 GN=TPP1 PE=1 SV=2;tr|A0A2R8Y7U1|A0A2R8Y7U1_HUMAN Tripeptidyl aminopeptidase (Fragment) OS=Homo sapiens OX=9606 GN=TPP1 PE=1 SV=1;tr|A0A2R8YGD1|A0A2R8YGD1_HUMAN Tripeptidyl aminopeptidase
25.8783	25.8614	25.6589	25.4626	25.7914	26.5522	26.0668	25.8981	26.4111	26.176	26.1929	26.9798	26.7774	26.8093	NaN	+	3NT_Control	15	15	15	18.3	18.3	18.3	133.06	0	72.151	1469400000	64	26.1797	25.7305	26.2208	26.6899	14	5	5	4	0.0082337	-0.490357	-3.48707	C9J2Y9;P30876;C9J4M6;C9JMN3;C9JZW8	C9J2Y9;P30876;C9J4M6	DNA-directed RNA polymerase;DNA-directed RNA polymerase II subunit RPB2	POLR2B	584	tr|C9J2Y9|C9J2Y9_HUMAN DNA-directed RNA polymerase subunit beta OS=Homo sapiens OX=9606 GN=POLR2B PE=1 SV=2;sp|P30876|RPB2_HUMAN DNA-directed RNA polymerase II subunit RPB2 OS=Homo sapiens OX=9606 GN=POLR2B PE=1 SV=1;tr|C9J4M6|C9J4M6_HUMAN DNA-directed RNA
27.0297	26.7632	26.7345	27.0564	26.6404	27.9218	27.1153	27.2369	27.2464	27.1007	27.5479	27.4508	27.245	27.1941	NaN	+	3NT_Control	31	31	31	36.4	36.4	36.4	134.55	0	323.31	5805800000	173	27.1631	26.8449	27.3242	27.3595	14	5	5	4	0.0247361	-0.479338	-2.75839	Q92896;H3BM42;H3BQT1;H3BQU9	Q92896;H3BM42	Golgi apparatus protein 1	GLG1	3199	sp|Q92896|GSLG1_HUMAN Golgi apparatus protein 1 OS=Homo sapiens OX=9606 GN=GLG1 PE=1 SV=2;tr|H3BM42|H3BM42_HUMAN Golgi apparatus protein 1 OS=Homo sapiens OX=9606 GN=GLG1 PE=1 SV=1
27.4502	26.8447	26.9919	26.874	27.4792	27.9168	27.4623	27.3863	27.491	27.6867	26.9492	27.8094	27.7233	27.6055	NaN	+	3NT_Control	3	3	3	36.4	36.4	36.4	12.326	0	10.017	2141600000	37	27.405	27.128	27.5886	27.5218	14	5	5	4	0.0263113	-0.46061	-2.71846	Q9UJC5	Q9UJC5	SH3 domain-binding glutamic acid-rich-like protein 2	SH3BGRL2	3785	sp|Q9UJC5|SH3L2_HUMAN SH3 domain-binding glutamic acid-rich-like protein 2 OS=Homo sapiens OX=9606 GN=SH3BGRL2 PE=1 SV=2
28.2342	27.9537	28.0977	28.4385	28.0884	28.708	28.0899	28.4126	28.8656	28.9772	28.8513	28.5557	28.4541	28.4509	NaN	+	3NT_Control	51	48	29	33.8	31.5	19	227.87	0	323.31	8618700000	274	28.4413	28.1625	28.6107	28.578	14	5	5	4	0.0381788	-0.448167	-2.47887	Q7Z406;A1L2Z2;A0A0C4DFM8;A0A2R8Y4C3;A0A2R8Y454	Q7Z406	Myosin-14	MYH14	2962	sp|Q7Z406|MYH14_HUMAN Myosin-14 OS=Homo sapiens OX=9606 GN=MYH14 PE=1 SV=2
26.5585	26.4834	26.3821	25.9109	26.2669	26.628	27.0589	26.7204	26.6649	26.7626	26.3888	26.3423	26.4292	26.217	NaN	+	3NT_Control	6	6	6	18.2	18.2	18.2	52.743	0	44.266	1101500000	28	26.4867	26.3204	26.7669	26.3443	14	5	5	4	0.0114888	-0.446585	-3.26224	O15269;A0A2R8Y4S0;A0A2R8Y6A2	O15269	Serine palmitoyltransferase 1	SPTLC1	1375	sp|O15269|SPTC1_HUMAN Serine palmitoyltransferase 1 OS=Homo sapiens OX=9606 GN=SPTLC1 PE=1 SV=1
35.1502	34.743	34.7473	34.2208	35.1998	35.2306	35.3927	35.1293	35.0944	35.4099	35.3968	35.9607	35.5115	35.6289	33.5945	+	3NT_Control	18	18	0	56.6	56.6	0	18.804	0	248.47	1491700000000	5400	35.094	34.8122	35.2514	35.2185	15	5	5	5	0.0479056	-0.439138	-2.33342	U3KQK0;Q99879;Q99877;Q93079;Q5QNW6;P62807;P58876;Q99880	U3KQK0;Q99879;Q99877;Q93079;Q5QNW6;P62807;P58876;Q99880	Histone H2B;Histone H2B type 1-M;Histone H2B type 1-N;Histone H2B type 1-H;Histone H2B type 2-F;Histone H2B type 1-C/E/F/G/I;Histone H2B type 1-D;Histone H2B type 1-L	HIST1H2BN;HIST1H2BM;HIST1H2BH;HIST2H2BF;HIST1H2BC;HIST1H2BD;HIST1H2BL	2327	tr|U3KQK0|U3KQK0_HUMAN Histone H2B OS=Homo sapiens OX=9606 GN=H2BC15 PE=1 SV=1;sp|Q99879|H2B1M_HUMAN Histone H2B type 1-M OS=Homo sapiens OX=9606 GN=H2BC14 PE=1 SV=3;sp|Q99877|H2B1N_HUMAN Histone H2B type 1-N OS=Homo sapiens OX=9606 GN=H2BC15 PE=1 SV=3;sp|
27.7309	27.727	27.7615	27.2017	27.7752	28.4388	28.0203	27.9722	28.1415	27.7752	28.4375	28.2974	28.2682	28.6407	NaN	+	3NT_Control	8	8	8	56.8	56.8	56.8	12.712	0	120.67	10290000000	146	28.0134	27.6393	28.0696	28.4109	14	5	5	4	0.0241167	-0.430345	-2.77482	P30046;B5MC82;A6NHG4;J3KQ18;H7C342	P30046;B5MC82;A6NHG4;J3KQ18	D-dopachrome decarboxylase;D-dopachrome decarboxylase-like protein	DDT;DDTL	1998	sp|P30046|DOPD_HUMAN D-dopachrome decarboxylase OS=Homo sapiens OX=9606 GN=DDT PE=1 SV=3;tr|B5MC82|B5MC82_HUMAN D-dopachrome decarboxylase OS=Homo sapiens OX=9606 GN=DDT PE=3 SV=2;sp|A6NHG4|DDTL_HUMAN D-dopachrome decarboxylase-like protein OS=Homo sapiens
26.4557	26.3674	26.3484	25.9822	26.3057	26.5125	26.5466	26.7455	27.0127	26.6944	NaN	NaN	NaN	NaN	NaN	+	3NT_Control	7	7	7	18.3	18.3	18.3	66.591	0	61.208	1039700000	26	26.4971	26.2919	26.7023	NaN	10	5	5	0	0.00926667	-0.410453	-3.40681	Q9Y5X1	Q9Y5X1	Sorting nexin-9	SNX9	3925	sp|Q9Y5X1|SNX9_HUMAN Sorting nexin-9 OS=Homo sapiens OX=9606 GN=SNX9 PE=1 SV=1
26.2842	26.0978	26.1318	26.209	26.0228	27.0001	26.2494	26.3117	26.5591	26.619	26.1757	26.0981	26.4925	26.5896	NaN	+	3NT_Control	12	12	12	32.8	32.8	32.8	63.972	0	82.152	1740400000	48	26.3458	26.1491	26.5479	26.339	14	5	5	4	0.0219428	-0.398747	-2.83611	O15371;B0QYA5;B0QYA4;A0A0D9SGB5;B0QYA6	O15371	Eukaryotic translation initiation factor 3 subunit D	EIF3D	1381	sp|O15371|EIF3D_HUMAN Eukaryotic translation initiation factor 3 subunit D OS=Homo sapiens OX=9606 GN=EIF3D PE=1 SV=1
27.6994	27.4504	27.7074	27.5052	27.3627	28.4321	27.8372	27.8059	27.8633	27.7725	28.4936	28.3801	28.6213	28.3863	NaN	+	3NT_Control	20	20	20	43.7	43.7	43.7	52.948	0	281.35	8173400000	177	27.9512	27.545	27.9422	28.4703	14	5	5	4	0.022733	-0.397138	-2.81313	P07099;B1AQP8;B1AQP9	P07099	Epoxide hydrolase 1	EPHX1	1686	sp|P07099|HYEP_HUMAN Epoxide hydrolase 1 OS=Homo sapiens OX=9606 GN=EPHX1 PE=1 SV=1
26.5317	26.2485	26.2854	26.2862	26.2158	26.8255	26.4072	26.6283	27.0317	26.5393	26.2444	26.6185	26.8721	26.7486	NaN	+	3NT_Control	20	20	20	21.4	21.4	21.4	141.45	0	147.35	3455900000	116	26.5345	26.3135	26.6864	26.6209	14	5	5	4	0.01651	-0.372864	-3.02197	Q00341;A0A024R4E5;H0Y394;H7C0A4;H7C2D1;C9JIZ1;H7BZC3;C9J5E5;C9JZI8;C9JES8;C9JHZ8;C9JK79;C9JHS7;C9JT62;C9JHN6;C9JEJ8;C9JBS3;C9JQ82;C9JMQ6;C9J739;C9JHS9	Q00341;A0A024R4E5;H0Y394	Vigilin	HDLBP	1	sp|Q00341|VIGLN_HUMAN Vigilin OS=Homo sapiens OX=9606 GN=HDLBP PE=1 SV=2;tr|A0A024R4E5|A0A024R4E5_HUMAN High density lipoprotein binding protein (Vigilin), isoform CRA_a OS=Homo sapiens OX=9606 GN=HDLBP PE=1 SV=1;tr|H0Y394|H0Y394_HUMAN Vigilin (Fragment) O
25.3738	25.1992	25.1656	24.986	24.6484	25.083	25.4694	25.648	25.5465	25.4528	25.6156	NaN	25.6402	24.9735	NaN	+	3NT_Control	6	6	6	18.1	18.1	18.1	62.21	0	52.545	594910000	36	25.2925	25.0746	25.4399	25.4098	13	5	5	3	0.0471407	-0.365338	-2.34373	Q9Y6N9;E9PNW1	Q9Y6N9	Harmonin	USH1C	3956	sp|Q9Y6N9|USH1C_HUMAN Harmonin OS=Homo sapiens OX=9606 GN=USH1C PE=1 SV=3
27.0112	27.1164	27.092	27.2645	27.0587	27.8425	27.4654	27.2828	27.3568	27.419	27.4959	27.6602	27.5278	27.6012	NaN	+	3NT_Control	12	12	12	22	22	22	75.775	0	104.13	3151700000	112	27.371	27.1086	27.4733	27.5713	14	5	5	4	0.00892365	-0.364715	-3.43237	Q99805	Q99805	Transmembrane 9 superfamily member 2	TM9SF2	3372	sp|Q99805|TM9S2_HUMAN Transmembrane 9 superfamily member 2 OS=Homo sapiens OX=9606 GN=TM9SF2 PE=1 SV=1
25.8722	25.7084	26.0857	26.2387	25.9709	26.0258	26.7179	26.4666	26.1091	26.3692	NaN	25.7587	26.1447	26.3074	NaN	+	3NT_Control	13	13	12	36.1	36.1	34	39.869	0	45.805	1210600000	52	26.1366	25.9752	26.3377	26.0703	13	5	5	3	0.0465214	-0.362543	-2.3522	Q9Y376;A0A087X0K1	Q9Y376;A0A087X0K1	Calcium-binding protein 39	CAB39	3882	sp|Q9Y376|CAB39_HUMAN Calcium-binding protein 39 OS=Homo sapiens OX=9606 GN=CAB39 PE=1 SV=1;tr|A0A087X0K1|A0A087X0K1_HUMAN Calcium-binding protein 39 OS=Homo sapiens OX=9606 GN=CAB39 PE=1 SV=1
25.8298	25.6755	25.8387	25.7708	25.2871	26.2539	26.0306	25.8973	26.0416	25.984	26.3219	26.1116	25.932	26.1554	NaN	+	3NT_Control	10	9	9	14.2	13.3	13.3	93.673	0	37.927	934670000	48	25.9379	25.6804	26.0415	26.1302	14	5	5	4	0.0157235	-0.361074	-3.05407	Q8TCJ2	Q8TCJ2	Dolichyl-diphosphooligosaccharide--protein glycosyltransferase subunit STT3B	STT3B	3120	sp|Q8TCJ2|STT3B_HUMAN Dolichyl-diphosphooligosaccharide--protein glycosyltransferase subunit STT3B OS=Homo sapiens OX=9606 GN=STT3B PE=1 SV=1
28.5063	28.1135	28.2796	28.3429	28.0704	28.8779	28.4428	28.6554	28.3963	28.723	28.0612	27.9904	28.259	28.0904	NaN	+	3NT_Control	37	37	37	32.5	32.5	32.5	152.45	0	323.31	16475000000	414	28.3435	28.2625	28.6191	28.1003	14	5	5	4	0.017433	-0.356541	-2.98626	Q9P2E9;A0A087WVV2;F8W7S5;A0A087WU26;A2A2S5;V9GY78	Q9P2E9;A0A087WVV2;F8W7S5	Ribosome-binding protein 1	RRBP1	3727	sp|Q9P2E9|RRBP1_HUMAN Ribosome-binding protein 1 OS=Homo sapiens OX=9606 GN=RRBP1 PE=1 SV=5;tr|A0A087WVV2|A0A087WVV2_HUMAN Ribosome-binding protein 1 OS=Homo sapiens OX=9606 GN=RRBP1 PE=1 SV=1;tr|F8W7S5|F8W7S5_HUMAN Ribosome-binding protein 1 OS=Homo sapie
26.104	25.6977	25.7446	25.7995	26.0899	26.1122	25.8804	26.2868	26.611	26.2596	26.0763	26.9577	26.6536	26.1265	NaN	+	3NT_Control	18	18	10	20.3	20.3	12.7	121.9	0	97.593	1638200000	78	26.1714	25.8871	26.23	26.4535	14	5	5	4	0.0490598	-0.342854	-2.31816	O60264	O60264	SWI/SNF-related matrix-associated actin-dependent regulator of chromatin subfamily A member 5	SMARCA5	1437	sp|O60264|SMCA5_HUMAN SWI/SNF-related matrix-associated actin-dependent regulator of chromatin subfamily A member 5 OS=Homo sapiens OX=9606 GN=SMARCA5 PE=1 SV=1
26.2385	26.2062	26.2361	26.1068	26.0729	26.2088	26.5782	26.4571	26.5283	26.7986	27.2374	26.5863	27.0555	26.6634	NaN	+	3NT_Control	3	3	3	11.6	11.6	11.6	56.777	0	192.53	1305100000	45	26.4982	26.1721	26.5142	26.8857	14	5	5	4	0.00971012	-0.342101	-3.37522	Q92575;F8WB86;Q6PJ80;C9JLR4	Q92575	UBX domain-containing protein 4	UBXN4	3176	sp|Q92575|UBXN4_HUMAN UBX domain-containing protein 4 OS=Homo sapiens OX=9606 GN=UBXN4 PE=1 SV=2
28.4575	28.2771	28.2074	27.9819	28.0334	28.863	28.3271	28.4722	28.4822	28.5017	29.0944	28.6912	28.7069	28.6333	NaN	+	3NT_Control	46	46	46	46	46	46	138.34	0	292.13	15078000000	378	28.4806	28.1914	28.5292	28.7814	14	5	5	4	0.0257739	-0.337766	-2.7318	P53621;A0A3B3IT15;A0A3B3IS84;A0A3B3ISC6;A0A3B3IU89;A0A3B3ITV3;A0A3B3ISK1;A0A3B3ITI7;A0A3B3IU78;A0A3B3IS23;A0A3B3ITX2;A0A3B3IU84	P53621;A0A3B3IT15;A0A3B3IS84;A0A3B3ISC6;A0A3B3IU89;A0A3B3ITV3	Coatomer subunit alpha;Xenin;Proxenin	COPA	2281	sp|P53621|COPA_HUMAN Coatomer subunit alpha OS=Homo sapiens OX=9606 GN=COPA PE=1 SV=2;tr|A0A3B3IT15|A0A3B3IT15_HUMAN Coatomer subunit alpha OS=Homo sapiens OX=9606 GN=COPA PE=1 SV=1;tr|A0A3B3IS84|A0A3B3IS84_HUMAN Coatomer subunit alpha OS=Homo sapiens OX=9
28.5009	28.1502	28.3519	28.1345	27.9688	28.3623	28.4272	28.5671	28.5453	28.6808	28.0226	28.2929	28.222	27.8555	NaN	+	3NT_Control	10	10	10	44.3	44.3	44.3	41.527	0	149.55	7356900000	117	28.2916	28.2213	28.5165	28.0983	14	5	5	4	0.0257826	-0.295288	-2.73158	A0A0J9YXF2;Q15165;G3XAK4;A0A0J9YXU7;A0A0J9YYJ1;A0A2Q2SAK4;A0A0J9YXM1	A0A0J9YXF2;Q15165;G3XAK4	Serum paraoxonase/arylesterase 2	PON2	237	tr|A0A0J9YXF2|A0A0J9YXF2_HUMAN Paraoxonase 2, isoform CRA_a OS=Homo sapiens OX=9606 GN=PON2 PE=1 SV=1;sp|Q15165|PON2_HUMAN Serum paraoxonase/arylesterase 2 OS=Homo sapiens OX=9606 GN=PON2 PE=1 SV=4;tr|G3XAK4|G3XAK4_HUMAN Paraoxonase 2, isoform CRA_c OS=Hom
25.4109	25.5037	25.4472	25.2455	25.5407	25.7007	25.6938	25.9399	25.7562	25.445	25.8053	25.902	25.485	25.565	NaN	+	3NT_Control	9	9	9	32.6	32.6	32.6	48.117	0	30.023	1136800000	37	25.6029	25.4296	25.7071	25.6893	14	5	5	4	0.0186355	-0.277542	-2.94259	Q9BZE1;S4R369;A6NHR2;H0Y4J2	Q9BZE1;S4R369	39S ribosomal protein L37, mitochondrial	MRPL37	3472	sp|Q9BZE1|RM37_HUMAN 39S ribosomal protein L37, mitochondrial OS=Homo sapiens OX=9606 GN=MRPL37 PE=1 SV=2;tr|S4R369|S4R369_HUMAN 39S ribosomal protein L37, mitochondrial OS=Homo sapiens OX=9606 GN=MRPL37 PE=1 SV=1
26.6827	26.8669	26.6956	26.7432	26.4194	27.1005	26.9684	26.9287	26.8071	26.9606	27.0075	27.012	27.1162	26.9052	NaN	+	3NT_Control	7	7	7	20.7	20.7	20.7	44.868	0	25.347	2307300000	76	26.8724	26.6816	26.9531	27.0102	14	5	5	4	0.0141312	-0.271499	-3.12455	P31689	P31689	DnaJ homolog subfamily A member 1	DNAJA1	2022	sp|P31689|DNJA1_HUMAN DnaJ homolog subfamily A member 1 OS=Homo sapiens OX=9606 GN=DNAJA1 PE=1 SV=2
27.1899	26.8873	27.2819	26.914	27.0746	27.4467	27.3985	27.2029	27.423	27.2337	28.3218	27.3075	27.5437	27.5281	NaN	+	3NT_Control	8	8	8	33.1	33.1	33.1	47.46	0	98.958	3006000000	77	27.3395	27.0695	27.341	27.6753	14	5	5	4	0.0182938	-0.27145	-2.9547	O96019;H7C5S0;C9JQT2;O94805	O96019;H7C5S0	Actin-like protein 6A	ACTL6A	1610	sp|O96019|ACL6A_HUMAN Actin-like protein 6A OS=Homo sapiens OX=9606 GN=ACTL6A PE=1 SV=1;tr|H7C5S0|H7C5S0_HUMAN Actin-like protein 6A (Fragment) OS=Homo sapiens OX=9606 GN=ACTL6A PE=1 SV=1
26.5842	26.5526	26.5065	26.9199	26.5383	26.7832	26.7438	26.9871	26.9503	26.9587	26.9094	27.0583	26.9652	26.877	NaN	+	3NT_Control	15	15	15	38.4	38.4	38.4	52.904	0	57.566	2580800000	60	26.8096	26.6203	26.8846	26.9525	14	5	5	4	0.0197863	-0.264312	-2.90347	O00232;J3KTJ5;J3KSK1	O00232	26S proteasome non-ATPase regulatory subunit 12	PSMD12	1295	sp|O00232|PSD12_HUMAN 26S proteasome non-ATPase regulatory subunit 12 OS=Homo sapiens OX=9606 GN=PSMD12 PE=1 SV=3
29.0279	28.6952	28.7774	28.5457	28.6365	29.1261	29.095	28.7666	28.9621	28.9989	28.3305	28.8332	28.5621	28.5949	NaN	+	3NT_Control	15	15	15	67.4	67.4	67.4	34.234	0	238.33	12056000000	280	28.7823	28.7365	28.9897	28.5802	14	5	5	4	0.0404308	-0.253196	-2.44212	P00387;B1AHF3	P00387;B1AHF3	NADH-cytochrome b5 reductase 3;NADH-cytochrome b5 reductase 3 membrane-bound form;NADH-cytochrome b5 reductase 3 soluble form	CYB5R3	1616	sp|P00387|NB5R3_HUMAN NADH-cytochrome b5 reductase 3 OS=Homo sapiens OX=9606 GN=CYB5R3 PE=1 SV=3;tr|B1AHF3|B1AHF3_HUMAN NADH-cytochrome b5 reductase 3 (Fragment) OS=Homo sapiens OX=9606 GN=CYB5R3 PE=1 SV=1
28.2501	28.2129	28.3427	28.0644	28.2426	28.752	28.3796	28.2953	28.5606	28.3779	28.1083	28.3332	28.644	28.1011	NaN	+	3NT_Control	23	23	23	45.1	45.1	45.1	54.389	0	260.59	17124000000	279	28.3332	28.2225	28.4731	28.2966	14	5	5	4	0.0281542	-0.250589	-2.67475	P50995;H0Y6E1	P50995	Annexin A11	ANXA11	2235	sp|P50995|ANX11_HUMAN Annexin A11 OS=Homo sapiens OX=9606 GN=ANXA11 PE=1 SV=1
25.2979	25.4246	25.1319	25.213	25.6307	25.5612	25.6488	25.4601	25.749	25.531	NaN	25.6243	25.4352	24.9829	NaN	+	3NT_Control	5	5	5	26.9	26.9	26.9	36.588	0	17.439	624440000	22	25.4377	25.3396	25.59	25.3475	13	5	5	3	0.0377055	-0.250406	-2.48687	P61964;V9GZ59;V9GYQ5	P61964	WD repeat-containing protein 5	WDR5	2369	sp|P61964|WDR5_HUMAN WD repeat-containing protein 5 OS=Homo sapiens OX=9606 GN=WDR5 PE=1 SV=1
28.518	28.529	28.4801	28.5944	28.3872	28.9261	28.6298	28.6552	28.9104	28.5678	28.2179	28.8245	28.7856	28.6827	NaN	+	3NT_Control	12	12	12	33.2	33.2	33.2	52.739	0	209.97	10247000000	188	28.622	28.5017	28.7378	28.6277	14	5	5	4	0.0209781	-0.236113	-2.86535	P20073	P20073	Annexin A7	ANXA7	1891	sp|P20073|ANXA7_HUMAN Annexin A7 OS=Homo sapiens OX=9606 GN=ANXA7 PE=1 SV=3
27.4933	27.553	27.6447	27.3188	27.4848	27.9702	27.6925	27.7088	27.7171	27.4975	27.8809	28.0076	28.0351	27.626	NaN	+	3NT_Control	11	11	11	37.5	37.5	37.5	51.109	0	82.542	5726100000	117	27.6879	27.4989	27.7172	27.8874	14	5	5	4	0.0452902	-0.218316	-2.36938	P41091;Q2VIR3;H7BZU1	P41091;Q2VIR3	Eukaryotic translation initiation factor 2 subunit 3;Putative eukaryotic translation initiation factor 2 subunit 3-like protein	EIF2S3;EIF2S3L	2113	sp|P41091|IF2G_HUMAN Eukaryotic translation initiation factor 2 subunit 3 OS=Homo sapiens OX=9606 GN=EIF2S3 PE=1 SV=3;sp|Q2VIR3|IF2GL_HUMAN Eukaryotic translation initiation factor 2 subunit 3B OS=Homo sapiens OX=9606 GN=EIF2S3B PE=2 SV=2
30.0601	30.1012	30.3249	29.9924	29.919	30.1641	30.437	30.3095	30.2058	30.3339	29.6205	29.6228	29.9609	29.9532	NaN	+	3NT_Control	25	25	25	44.9	44.9	44.9	68.124	0	323.31	31194000000	364	30.0718	30.0795	30.2901	29.7894	14	5	5	4	0.0366198	-0.210571	-2.50562	Q96CM8;E9PF16;D6RF87	Q96CM8;E9PF16	Acyl-CoA synthetase family member 2, mitochondrial	ACSF2	3247	sp|Q96CM8|ACSF2_HUMAN Medium-chain acyl-CoA ligase ACSF2, mitochondrial OS=Homo sapiens OX=9606 GN=ACSF2 PE=1 SV=2;tr|E9PF16|E9PF16_HUMAN Medium-chain acyl-CoA ligase ACSF2, mitochondrial OS=Homo sapiens OX=9606 GN=ACSF2 PE=1 SV=1
27.3419	27.1856	27.1882	26.9993	27.3245	27.5992	27.4142	27.3653	27.4565	27.2219	27.1455	27.4162	27.3576	26.9781	NaN	+	3NT_Control	19	19	19	70.5	70.5	70.5	33.232	0	323.31	5724500000	157	27.2853	27.2079	27.4114	27.2244	14	5	5	4	0.0474292	-0.203539	-2.33982	P54920;M0R0Y2;M0R2M1;M0R213;M0R058;M0R027;M0R0I4;A0A087WZQ7;Q9H115;M0QZM9;M0QZN5;M0R031	P54920;M0R0Y2;M0R2M1	Alpha-soluble NSF attachment protein	NAPA	2296	sp|P54920|SNAA_HUMAN Alpha-soluble NSF attachment protein OS=Homo sapiens OX=9606 GN=NAPA PE=1 SV=3;tr|M0R0Y2|M0R0Y2_HUMAN Alpha-soluble NSF attachment protein OS=Homo sapiens OX=9606 GN=NAPA PE=1 SV=1;tr|M0R2M1|M0R2M1_HUMAN Alpha-soluble NSF attachment pr
28.9953	29.0769	29.0686	29.2379	29.0782	29.5001	29.3484	29.2612	29.089	29.2355	29.529	29.2665	29.4737	29.3382	NaN	+	3NT_Control	18	18	18	52.2	52.2	52.2	42.741	0	226.81	22654000000	312	29.2499	29.0914	29.2868	29.4018	14	5	5	4	0.0375684	-0.195453	-2.48921	P30740;H7BXK7;C9J7N5;A0A1B0GU38;A0A0C4DGW9;P50452;P50453;O75830	P30740	Leukocyte elastase inhibitor	SERPINB1	2015	sp|P30740|ILEU_HUMAN Leukocyte elastase inhibitor OS=Homo sapiens OX=9606 GN=SERPINB1 PE=1 SV=1
26.1639	26.4769	26.1095	26.1982	26.2099	26.3657	26.3467	26.5051	26.4388	26.4607	NaN	26.2397	NaN	26.3554	NaN	+	3NT_Control	9	5	5	43.1	24.5	24.5	42.293	0	34.979	1153000000	28	26.3225	26.2317	26.4234	26.2976	12	5	5	2	0.0259276	-0.191721	-2.72796	P42025	P42025	Beta-centractin	ACTR1B	2120	sp|P42025|ACTY_HUMAN Beta-centractin OS=Homo sapiens OX=9606 GN=ACTR1B PE=1 SV=1
26.8971	27.089	27.0753	27.1674	26.9946	26.9056	26.9239	26.8126	26.9908	26.9146	26.6235	27.5141	26.7614	26.9351	NaN	+	3NT_Control	16	16	16	37.6	37.6	37.6	54.972	0	78.953	4657500000	161	26.9718	27.0447	26.9095	26.9585	14	5	5	4	0.0369143	0.135204	2.50048	O76021;J3QSV6;I3L3U9;I3L3C4;I3L234;J3KPU7;I3L2F2;I3L4T8;I3L1Y4;I3L1A3	O76021;J3QSV6;I3L3U9;I3L3C4	Ribosomal L1 domain-containing protein 1	RSL1D1	1529	sp|O76021|RL1D1_HUMAN Ribosomal L1 domain-containing protein 1 OS=Homo sapiens OX=9606 GN=RSL1D1 PE=1 SV=3;tr|J3QSV6|J3QSV6_HUMAN Ribosomal L1 domain-containing protein 1 (Fragment) OS=Homo sapiens OX=9606 GN=RSL1D1 PE=1 SV=1;tr|I3L3U9|I3L3U9_HUMAN Ribosom
28.2965	28.5892	28.5586	28.6265	28.5762	28.3799	28.3637	28.3825	28.4454	28.3342	28.4257	28.7517	28.5743	28.7532	NaN	+	3NT_Control	21	19	19	43.1	41.4	41.4	57.206	0	258.34	13625000000	276	28.5041	28.5294	28.3812	28.6262	14	5	5	4	0.0438398	0.148237	2.39023	P30837;A0A0U1RQK9	P30837	Aldehyde dehydrogenase X, mitochondrial	ALDH1B1	2016	sp|P30837|AL1B1_HUMAN Aldehyde dehydrogenase X, mitochondrial OS=Homo sapiens OX=9606 GN=ALDH1B1 PE=1 SV=3
31.4274	31.343	31.3735	31.2488	31.3368	31.0192	31.3387	31.314	31.132	31.0707	30.8312	30.8669	30.8141	30.809	NaN	+	3NT_Control	36	36	36	39	39	39	76.613	0	323.31	101830000000	986	31.1375	31.3459	31.1749	30.8303	14	5	5	4	0.0420239	0.170948	2.41734	P19338;H7BY16	P19338;H7BY16	Nucleolin	NCL	1880	sp|P19338|NUCL_HUMAN Nucleolin OS=Homo sapiens OX=9606 GN=NCL PE=1 SV=3;tr|H7BY16|H7BY16_HUMAN Nucleolin (Fragment) OS=Homo sapiens OX=9606 GN=NCL PE=1 SV=8
27.2438	27.4369	27.3499	27.2902	27.2889	27.0109	27.3119	27.2572	27.0266	27.0613	27.1067	26.9871	27.2449	27.3119	NaN	+	3NT_Control	8	8	8	39.1	39.1	39.1	24.593	0	107.12	3627600000	106	27.2092	27.3219	27.1336	27.1626	14	5	5	4	0.0292293	0.188346	2.65058	O75396;A0A087X1A9	O75396	Vesicle-trafficking protein SEC22b	SEC22B	1490	sp|O75396|SC22B_HUMAN Vesicle-trafficking protein SEC22b OS=Homo sapiens OX=9606 GN=SEC22B PE=1 SV=4
27.2375	27.4969	27.431	27.2516	27.3854	26.9993	27.2795	27.2056	27.0603	27.2721	27.2299	27.6315	27.2243	27.1171	NaN	+	3NT_Control	14	14	13	35.4	35.4	32.7	62.035	0	101	3550000000	83	27.273	27.3605	27.1634	27.3007	14	5	5	4	0.0321005	0.197125	2.59025	A0A182DWI3;E9PIR7;F8W809;A0A087WSW9;A0A087WSY9;Q16881;E2QRB9;E9PKD3;A0A0B4J225;E9PIZ5;E9PLT3;E9PKI4;E9PQI3;E9PJU2	A0A182DWI3;E9PIR7;F8W809;A0A087WSW9;A0A087WSY9;Q16881;E2QRB9;E9PKD3	Thioredoxin reductase 1, cytoplasmic	TXNRD1	251	tr|A0A182DWI3|A0A182DWI3_HUMAN Thioredoxin-disulfide reductase OS=Homo sapiens OX=9606 GN=TXNRD1 PE=1 SV=1;tr|E9PIR7|E9PIR7_HUMAN Thioredoxin-disulfide reductase OS=Homo sapiens OX=9606 GN=TXNRD1 PE=1 SV=1;tr|F8W809|F8W809_HUMAN Thioredoxin-disulfide reduc
27.8605	27.8222	27.5962	27.9221	27.6089	27.6328	27.5413	27.6987	27.5216	27.4164	27.0116	26.0784	26.7249	26.5413	NaN	+	3NT_Control	12	12	12	26.4	26.4	26.4	58.743	0	60.647	3244600000	83	27.3555	27.762	27.5622	26.589	14	5	5	4	0.0421331	0.199801	2.41568	Q8WXF1;X6RDA4	Q8WXF1;X6RDA4	Paraspeckle component 1	PSPC1	3163	sp|Q8WXF1|PSPC1_HUMAN Paraspeckle component 1 OS=Homo sapiens OX=9606 GN=PSPC1 PE=1 SV=1;tr|X6RDA4|X6RDA4_HUMAN Paraspeckle component 1 (Fragment) OS=Homo sapiens OX=9606 GN=PSPC1 PE=1 SV=1
28.2364	27.9086	28.0765	27.9357	28.1158	27.636	27.9498	28.0077	27.8703	27.7603	26.9927	27.4658	27.7137	27.4888	NaN	+	3NT_Control	15	15	15	55.7	55.7	55.7	39.594	0	184.18	7839900000	170	27.797	28.0546	27.8448	27.4153	14	5	5	4	0.0479359	0.209763	2.33301	Q9NYL9;H0YNJ8;H0YKU1;H0YNU8;P28289	Q9NYL9;H0YNJ8;H0YKU1	Tropomodulin-3	TMOD3	3699	sp|Q9NYL9|TMOD3_HUMAN Tropomodulin-3 OS=Homo sapiens OX=9606 GN=TMOD3 PE=1 SV=1;tr|H0YNJ8|H0YNJ8_HUMAN Tropomodulin-3 OS=Homo sapiens OX=9606 GN=TMOD3 PE=1 SV=1;tr|H0YKU1|H0YKU1_HUMAN Tropomodulin-3 (Fragment) OS=Homo sapiens OX=9606 GN=TMOD3 PE=1 SV=1
26.3699	26.5651	26.5567	26.346	26.6464	26.4868	26.1043	26.3477	26.3335	26.1593	26.6721	26.843	26.3407	26.7517	NaN	+	3NT_Control	20	20	20	30.6	30.6	30.6	90.98	0	167.49	3191900000	128	26.4659	26.4968	26.2863	26.6519	14	5	5	4	0.049092	0.210478	2.31774	P25205;J3KQ69;A0A499FHX9;Q7Z6P5	P25205;J3KQ69;A0A499FHX9	DNA replication licensing factor MCM3	MCM3	1945	sp|P25205|MCM3_HUMAN DNA replication licensing factor MCM3 OS=Homo sapiens OX=9606 GN=MCM3 PE=1 SV=3;tr|J3KQ69|J3KQ69_HUMAN DNA helicase OS=Homo sapiens OX=9606 GN=MCM3 PE=1 SV=3;tr|A0A499FHX9|A0A499FHX9_HUMAN DNA helicase OS=Homo sapiens OX=9606 GN=MCM3 P
29.5532	29.7051	29.6161	29.7679	29.5227	29.6585	29.3349	29.3977	29.3485	29.3661	29.8809	29.7973	30.1501	29.843	NaN	+	3NT_Control	41	41	41	59.4	59.4	59.4	89.321	0	323.31	37936000000	709	29.6387	29.633	29.4211	29.9178	14	5	5	4	0.0233484	0.211852	2.7958	P55072;C9IZA5;C9JUP7	P55072	Transitional endoplasmic reticulum ATPase	VCP	2300	sp|P55072|TERA_HUMAN Transitional endoplasmic reticulum ATPase OS=Homo sapiens OX=9606 GN=VCP PE=1 SV=4
27.1657	27.2455	27.21	27.3847	27.1298	26.8609	27.0553	27.2109	27.1275	26.8118	27.2949	26.0335	25.867	26.6671	NaN	+	3NT_Control	7	7	7	24.3	24.3	24.3	53.29	0	125.51	1838200000	40	26.9332	27.2271	27.0133	26.4656	14	5	5	4	0.04197	0.213858	2.41817	Q16204	Q16204	Coiled-coil domain-containing protein 6	CCDC6	2753	sp|Q16204|CCDC6_HUMAN Coiled-coil domain-containing protein 6 OS=Homo sapiens OX=9606 GN=CCDC6 PE=1 SV=2
27.7926	28.0534	28.0379	28.1504	28.0373	27.6088	27.8031	27.745	28.0173	27.8274	28.0253	28.2101	27.6592	27.6868	NaN	+	3NT_Control	12	12	12	18.3	18.3	18.3	100.03	0	161.6	5656800000	86	27.9039	28.0143	27.8003	27.8953	14	5	5	4	0.0425883	0.214003	2.40879	A0A087WXI5;P12830;A0A087WX17;A0A087WU43;H3BNC6;H3BVI7;J3QKP1	A0A087WXI5;P12830	Cadherin-1;E-Cad/CTF1;E-Cad/CTF2;E-Cad/CTF3	CDH1	59	tr|A0A087WXI5|A0A087WXI5_HUMAN Cadherin-1 OS=Homo sapiens OX=9606 GN=CDH1 PE=1 SV=1;sp|P12830|CADH1_HUMAN Cadherin-1 OS=Homo sapiens OX=9606 GN=CDH1 PE=1 SV=3
26.4925	26.5115	26.4525	26.5889	26.7049	26.3862	26.4448	26.3076	26.2658	26.263	NaN	26.0735	25.9337	26.218	NaN	+	3NT_Control	13	13	13	20.7	20.7	20.7	87.99	0	61.754	1492500000	65	26.3571	26.5501	26.3335	26.075	13	5	5	3	0.00528688	0.216568	3.7933	Q8IYB8;B1AR60	Q8IYB8	ATP-dependent RNA helicase SUPV3L1, mitochondrial	SUPV3L1	3025	sp|Q8IYB8|SUV3_HUMAN ATP-dependent RNA helicase SUPV3L1, mitochondrial OS=Homo sapiens OX=9606 GN=SUPV3L1 PE=1 SV=1
27.3703	27.4126	27.1901	27.265	27.3427	27.1793	27.1388	27.0701	27.0238	27.0719	27.3272	28.2639	27.0517	27.1053	NaN	+	3NT_Control	12	12	12	22.1	22.1	22.1	79.154	0	95.668	2785900000	68	27.2723	27.3161	27.0968	27.437	14	5	5	4	0.0018987	0.219347	4.5402	Q9UEY8	Q9UEY8	Gamma-adducin	ADD3	3747	sp|Q9UEY8|ADDG_HUMAN Gamma-adducin OS=Homo sapiens OX=9606 GN=ADD3 PE=1 SV=1
26.1386	26.144	25.8675	26.1783	26.157	25.9415	25.7646	25.861	25.9456	25.846	25.5724	NaN	NaN	NaN	NaN	+	3NT_Control	7	7	6	32.4	32.4	28.9	25.486	0	25.034	949100000	35	25.9469	26.0971	25.8717	25.5724	11	5	5	1	0.00978217	0.225359	3.37024	P08579	P08579	U2 small nuclear ribonucleoprotein B	SNRPB2	1716	sp|P08579|RU2B_HUMAN U2 small nuclear ribonucleoprotein B OS=Homo sapiens OX=9606 GN=SNRPB2 PE=1 SV=1
26.1904	26.2854	26.1961	26.4104	26.5211	26.1161	25.9994	26.0796	26.1271	25.8397	26.0583	25.8275	26.2711	25.7926	NaN	+	3NT_Control	4	4	4	24.3	24.3	24.3	27.086	0	19.305	934140000	27	26.1225	26.3207	26.0324	25.9874	14	5	5	4	0.00849408	0.288298	3.46588	J3KNF4;O14618;E9PP76;E9PK03	J3KNF4;O14618;E9PP76	Copper chaperone for superoxide dismutase;Superoxide dismutase [Cu-Zn]	CCS	1185	tr|J3KNF4|J3KNF4_HUMAN Copper chaperone for superoxide dismutase OS=Homo sapiens OX=9606 GN=CCS PE=1 SV=1;sp|O14618|CCS_HUMAN Copper chaperone for superoxide dismutase OS=Homo sapiens OX=9606 GN=CCS PE=1 SV=1;tr|E9PP76|E9PP76_HUMAN Copper chaperone for sup
29.0556	28.9655	28.9209	28.9652	28.9509	28.3572	28.9358	28.9713	28.5805	28.4741	28.3311	28.2883	28.7272	28.3005	NaN	+	3NT_Control	11	10	10	50.2	50.2	50.2	27.228	0	90.308	7056400000	130	28.7017	28.9716	28.6638	28.4118	14	5	5	4	0.0398885	0.307833	2.45078	O95292;E5RK64	O95292	Vesicle-associated membrane protein-associated protein B/C	VAPB	1561	sp|O95292|VAPB_HUMAN Vesicle-associated membrane protein-associated protein B/C OS=Homo sapiens OX=9606 GN=VAPB PE=1 SV=3
28.6562	29.0844	29.0463	29.0288	29.3043	28.8499	28.7762	28.8401	28.6722	28.4145	29.1956	28.9451	28.6769	28.8513	NaN	+	3NT_Control	8	8	8	59.4	59.4	59.4	22.04	0	114.35	8550600000	156	28.8816	29.024	28.7106	28.9172	14	5	5	4	0.0447585	0.313396	2.37695	P30405;R4GN99;H0Y548	P30405;R4GN99;H0Y548	Peptidyl-prolyl cis-trans isomerase F, mitochondrial;Peptidyl-prolyl cis-trans isomerase	PPIF	2009	sp|P30405|PPIF_HUMAN Peptidyl-prolyl cis-trans isomerase F, mitochondrial OS=Homo sapiens OX=9606 GN=PPIF PE=1 SV=1;tr|R4GN99|R4GN99_HUMAN Peptidyl-prolyl cis-trans isomerase OS=Homo sapiens OX=9606 GN=PPIF PE=1 SV=1;tr|H0Y548|H0Y548_HUMAN Peptidyl-prolyl
26.81	27.1042	26.9778	27.0742	27.0616	26.5638	26.7222	26.6539	26.8866	26.6309	26.6436	26.9	27.2566	26.7802	NaN	+	3NT_Control	14	14	14	20.2	20.2	20.2	89.301	0	103.51	3047600000	118	26.8618	27.0056	26.6915	26.8951	14	5	5	4	0.00340427	0.314095	4.10709	P46087;F5H5X6;F5GYR3;F5GWB7;F5H709;F5H359;F5H8G6	P46087	Probable 28S rRNA (cytosine(4447)-C(5))-methyltransferase	NOP2	2151	sp|P46087|NOP2_HUMAN Probable 28S rRNA (cytosine(4447)-C(5))-methyltransferase OS=Homo sapiens OX=9606 GN=NOP2 PE=1 SV=2
30.0318	30.4699	30.4296	30.6078	30.6215	30.2828	30.1882	30.2326	29.8465	29.9724	30.1618	30.2546	30.0252	30.0518	NaN	+	3NT_Control	9	9	9	37.1	37.1	37.1	32.816	0	58.134	21067000000	223	30.2269	30.4321	30.1045	30.1234	14	5	5	4	0.0420905	0.327598	2.41633	P42126;Q96DC0;H3BS70	P42126;Q96DC0;H3BS70	Enoyl-CoA delta isomerase 1, mitochondrial	ECI1;DCI	2121	sp|P42126|ECI1_HUMAN Enoyl-CoA delta isomerase 1, mitochondrial OS=Homo sapiens OX=9606 GN=ECI1 PE=1 SV=1;tr|Q96DC0|Q96DC0_HUMAN DCI protein OS=Homo sapiens OX=9606 GN=ECI1 PE=1 SV=1;tr|H3BS70|H3BS70_HUMAN Enoyl-CoA delta isomerase 1, mitochondrial (Fragme
32.5139	33.1496	33.1699	32.9772	33.2214	32.7285	32.8477	32.6465	32.5698	32.5751	33.5052	33.3711	32.6754	32.6685	30.5516	+	3NT_Control	25	25	25	68.6	68.6	68.6	35.503	0	323.31	337830000000	1208	32.7448	33.0064	32.6735	32.5544	15	5	5	5	0.0445769	0.3329	2.37955	P40926;G3XAL0	P40926;G3XAL0	Malate dehydrogenase, mitochondrial;Malate dehydrogenase	MDH2	2110	sp|P40926|MDHM_HUMAN Malate dehydrogenase, mitochondrial OS=Homo sapiens OX=9606 GN=MDH2 PE=1 SV=3;tr|G3XAL0|G3XAL0_HUMAN Malate dehydrogenase OS=Homo sapiens OX=9606 GN=MDH2 PE=1 SV=1
28.5426	28.7274	28.7576	28.7458	28.9655	28.232	28.5729	28.599	28.403	28.266	28.5916	28.0085	27.856	27.8443	NaN	+	3NT_Control	9	9	9	59.2	59.2	59.2	23.31	0	112.21	7856900000	110	28.4366	28.7478	28.4146	28.0751	14	5	5	4	0.0109593	0.333205	3.29383	P43487;F6WQW2;C9JJ34;C9JXG8;C9JDM3;C9JGV6;C9JIC6	P43487;F6WQW2;C9JJ34;C9JXG8	Ran-specific GTPase-activating protein	RANBP1	2138	sp|P43487|RANG_HUMAN Ran-specific GTPase-activating protein OS=Homo sapiens OX=9606 GN=RANBP1 PE=1 SV=1;tr|F6WQW2|F6WQW2_HUMAN Ran-specific GTPase-activating protein OS=Homo sapiens OX=9606 GN=RANBP1 PE=1 SV=1;tr|C9JJ34|C9JJ34_HUMAN Ran-specific GTPase-act
29.1929	29.1838	28.8173	29.4653	29.13	28.7239	28.8141	28.9336	28.9373	28.7057	29.0997	28.9125	29.2019	29	NaN	+	3NT_Control	10	10	10	61	61	61	20.457	0	257.61	14708000000	257	29.0084	29.1579	28.8229	29.0535	14	5	5	4	0.0191176	0.334978	2.9259	J3QRS3;P19105;O14950;J3KTJ1;P24844	J3QRS3;P19105;O14950;J3KTJ1;P24844	Myosin regulatory light chain 12A;Myosin regulatory light chain 12B;Myosin regulatory light polypeptide 9	MYL12A;MYL12B;MYL9	1219	tr|J3QRS3|J3QRS3_HUMAN Myosin regulatory light chain 12A OS=Homo sapiens OX=9606 GN=MYL12A PE=1 SV=1;sp|P19105|ML12A_HUMAN Myosin regulatory light chain 12A OS=Homo sapiens OX=9606 GN=MYL12A PE=1 SV=2;sp|O14950|ML12B_HUMAN Myosin regulatory light chain 12B
28.9185	28.9317	29.0573	29.0125	29.1728	28.7561	28.8278	28.8416	28.4965	28.493	28.6135	28.4873	28.6965	28.763	NaN	+	3NT_Control	4	4	4	41.7	41.7	41.7	17.162	0	23.828	6753300000	73	28.7906	29.0186	28.683	28.6401	14	5	5	4	0.00611218	0.335578	3.69205	Q9BX68	Q9BX68	Histidine triad nucleotide-binding protein 2, mitochondrial	HINT2	3449	sp|Q9BX68|HINT2_HUMAN Histidine triad nucleotide-binding protein 2, mitochondrial OS=Homo sapiens OX=9606 GN=HINT2 PE=1 SV=1
29.2523	29.7232	29.748	29.538	29.8825	28.9054	29.373	29.3057	29.3979	29.4323	27.8596	28.47	28.0335	28.5955	NaN	+	3NT_Control	18	18	18	66.6	66.6	66.6	38.534	0	323.31	20767000000	280	29.1084	29.6288	29.2829	28.2397	14	5	5	4	0.0448538	0.345945	2.37558	Q9UJZ1;A0A087WYB4;F2Z2I8	Q9UJZ1;A0A087WYB4	Stomatin-like protein 2, mitochondrial	STOML2	3790	sp|Q9UJZ1|STML2_HUMAN Stomatin-like protein 2, mitochondrial OS=Homo sapiens OX=9606 GN=STOML2 PE=1 SV=1;tr|A0A087WYB4|A0A087WYB4_HUMAN Stomatin-like protein 2, mitochondrial OS=Homo sapiens OX=9606 GN=STOML2 PE=1 SV=1
26.3636	26.451	26.1475	26.5952	26.2891	26.0694	25.875	26.1368	26.0619	25.9686	24.8949	26.3369	26.9123	26.7665	NaN	+	3NT_Control	32	32	32	31.6	31.6	31.6	197.46	0	232.68	3510100000	148	26.2049	26.3693	26.0224	26.2276	14	5	5	4	0.00427948	0.346912	3.94273	G3V1L9;Q07157;A0A087X0K9;G5E9E7;H0YKB1;H0Y3R8;H0YLT6	G3V1L9;Q07157;A0A087X0K9;G5E9E7	Tight junction protein ZO-1	TJP1	1017	tr|G3V1L9|G3V1L9_HUMAN Tight junction protein 1 (Zona occludens 1), isoform CRA_a OS=Homo sapiens OX=9606 GN=TJP1 PE=1 SV=1;sp|Q07157|ZO1_HUMAN Tight junction protein ZO-1 OS=Homo sapiens OX=9606 GN=TJP1 PE=1 SV=3;tr|A0A087X0K9|A0A087X0K9_HUMAN Tight junct
27.386	27.5715	27.3967	27.6926	27.618	26.74	27.2202	27.5936	26.9916	27.2966	27.3986	27.2772	27.307	27.2034	NaN	+	3NT_Control	8	8	8	62.5	62.5	62.5	16.62	0	78.93	3306000000	115	27.3352	27.533	27.1684	27.2965	14	5	5	4	0.0480559	0.364568	2.33141	Q4VC31;C9JQ41;H7C525;C9JBU9	Q4VC31;C9JQ41;H7C525	Coiled-coil domain-containing protein 58	CCDC58	2800	sp|Q4VC31|CCD58_HUMAN Coiled-coil domain-containing protein 58 OS=Homo sapiens OX=9606 GN=CCDC58 PE=1 SV=1;tr|C9JQ41|C9JQ41_HUMAN Coiled-coil domain-containing protein 58 OS=Homo sapiens OX=9606 GN=CCDC58 PE=1 SV=1;tr|H7C525|H7C525_HUMAN Coiled-coil domain
31.3199	31.1456	31.0941	31.4209	31.4312	30.8994	31.0209	31.1615	30.6801	30.7947	30.5776	30.5738	31.0295	31.1495	NaN	+	3NT_Control	10	10	10	80.5	80.5	80.5	16.837	0	323.31	57311000000	363	31.0213	31.2823	30.9113	30.8326	14	5	5	4	0.00941835	0.370996	3.39583	P0DP25;P0DP24;P0DP23;E7EMB3;Q96HY3;M0QZ52;G3V361;A0A590UJI2;F8WBR5;G3V479;A0A590UJC0;G3V226	P0DP25;P0DP24;P0DP23;E7EMB3;Q96HY3;M0QZ52;G3V361;A0A590UJI2		CALM2;CALM3;CALM1	1746	sp|P0DP25|CALM3_HUMAN Calmodulin-3 OS=Homo sapiens OX=9606 GN=CALM3 PE=1 SV=1;sp|P0DP24|CALM2_HUMAN Calmodulin-2 OS=Homo sapiens OX=9606 GN=CALM2 PE=1 SV=1;sp|P0DP23|CALM1_HUMAN Calmodulin-1 OS=Homo sapiens OX=9606 GN=CALM1 PE=1 SV=1;tr|E7EMB3|E7EMB3_HUMAN
29.6197	29.6979	29.8543	30.0684	29.7853	29.0906	29.7483	29.4106	29.4238	29.4351	29.4508	29.2351	29.1219	29.5649	NaN	+	3NT_Control	9	9	9	61.8	61.8	61.8	24.763	0	107.91	9844000000	100	29.5362	29.8052	29.4217	29.3432	14	5	5	4	0.0180121	0.383492	2.96486	P24534;C9JZW3;F2Z2G2;F8WF65	P24534	Elongation factor 1-beta	EEF1B2	1939	sp|P24534|EF1B_HUMAN Elongation factor 1-beta OS=Homo sapiens OX=9606 GN=EEF1B2 PE=1 SV=3
27.7543	27.7279	27.7619	27.9616	28.0142	27.2821	27.5001	27.3382	27.7034	27.3843	27.8825	27.345	27.7776	27.6679	NaN	+	3NT_Control	14	14	11	59.2	59.2	47.5	36.899	0	158.7	6074700000	133	27.6501	27.844	27.4416	27.6683	14	5	5	4	0.00294387	0.402369	4.21298	Q9NQG5;E9PIQ9;E9PQF3;A2A2M0;A0A087X2D2;A0A087WUK3;K7EQR8	Q9NQG5	Regulation of nuclear pre-mRNA domain-containing protein 1B	RPRD1B	3614	sp|Q9NQG5|RPR1B_HUMAN Regulation of nuclear pre-mRNA domain-containing protein 1B OS=Homo sapiens OX=9606 GN=RPRD1B PE=1 SV=1
26.3823	26.8472	26.4582	26.8638	26.8851	26.1604	26.4666	26.1931	26.2248	26.3633	NaN	25.8198	26.5436	25.4735	NaN	+	3NT_Control	8	8	8	30.3	30.3	30.3	38.044	0	60.463	1599800000	70	26.3601	26.6873	26.2816	25.9456	13	5	5	3	0.0113767	0.405671	3.26879	P25685;M0R080;M0QYT3;M0QXK0;M0R128;A0A1B0GX60;M0R1D6;M0QZD0	P25685;M0R080	DnaJ homolog subfamily B member 1	DNAJB1	1948	sp|P25685|DNJB1_HUMAN DnaJ homolog subfamily B member 1 OS=Homo sapiens OX=9606 GN=DNAJB1 PE=1 SV=4;tr|M0R080|M0R080_HUMAN DnaJ homolog subfamily B member 1 (Fragment) OS=Homo sapiens OX=9606 GN=DNAJB1 PE=1 SV=1
27.202	27.4245	27.3519	27.6967	27.7605	26.7886	27.2511	27.3267	27.2578	26.7349	27.2273	27.8993	27.6019	27.5124	NaN	+	3NT_Control	9	9	9	44.8	44.8	44.8	25.542	0	35.836	2279300000	72	27.3597	27.4871	27.0718	27.5602	14	5	5	4	0.0363838	0.415298	2.50977	Q13242;H0YIB4;S4R3G0	Q13242;H0YIB4;S4R3G0	Serine/arginine-rich splicing factor 9	SRSF9	2592	sp|Q13242|SRSF9_HUMAN Serine/arginine-rich splicing factor 9 OS=Homo sapiens OX=9606 GN=SRSF9 PE=1 SV=1;tr|H0YIB4|H0YIB4_HUMAN Serine/arginine-rich-splicing factor 9 (Fragment) OS=Homo sapiens OX=9606 GN=SRSF9 PE=1 SV=8;tr|S4R3G0|S4R3G0_HUMAN Serine/argini
28.4012	28.5109	28.624	29.1473	28.9108	28.1634	28.4231	28.3618	28.3293	28.2145	28.5471	28.6055	28.2592	28.4593	NaN	+	3NT_Control	9	9	9	34	34	34	31.362	0	181.36	13611000000	198	28.497	28.7188	28.2984	28.4678	14	5	5	4	0.0197864	0.420422	2.90346	Q07021;I3L3Q7;I3L3B0	Q07021;I3L3Q7;I3L3B0	Complement component 1 Q subcomponent-binding protein, mitochondrial	C1QBP	2520	sp|Q07021|C1QBP_HUMAN Complement component 1 Q subcomponent-binding protein, mitochondrial OS=Homo sapiens OX=9606 GN=C1QBP PE=1 SV=1;tr|I3L3Q7|I3L3Q7_HUMAN Complement component 1 Q subcomponent-binding protein, mitochondrial (Fragment) OS=Homo sapiens OX=
27.2291	27.1738	27.3959	27.1752	27.3639	26.371	27.09	26.8794	27.0783	26.7061	NaN	25.4638	26.0804	26.4292	NaN	+	3NT_Control	9	9	9	34.4	34.4	34.4	16.273	0	137.16	3137000000	80	26.8028	27.2676	26.825	25.9911	13	5	5	3	0.014193	0.442625	3.12166	P62263;A0A2R8Y811;E5RH77	P62263;A0A2R8Y811;E5RH77	40S ribosomal protein S14	RPS14	323	sp|P62263|RS14_HUMAN 40S ribosomal protein S14 OS=Homo sapiens OX=9606 GN=RPS14 PE=1 SV=3;tr|A0A2R8Y811|A0A2R8Y811_HUMAN 40S ribosomal protein S14 (Fragment) OS=Homo sapiens OX=9606 GN=RPS14 PE=1 SV=1;tr|E5RH77|E5RH77_HUMAN 40S ribosomal protein S14 OS=Hom
27.2347	26.9929	26.646	26.4298	26.6106	25.9623	26.5168	26.4593	26.1007	26.6169	25.5143	25.9594	23.7941	26.4703	NaN	+	3NT_Control	13	13	13	56.3	56.3	56.3	36.032	0	166.3	2404300000	69	26.2363	26.7828	26.3312	25.4345	14	5	5	4	0.0471986	0.451605	2.34294	P30519;A0A087WT44;I3L159;I3L1F5;I3L276;I3L4P8;A0A1B0GXH0;I3L463;I3L1Y2	P30519;A0A087WT44;I3L159;I3L1F5	Heme oxygenase 2	HMOX2	2011	sp|P30519|HMOX2_HUMAN Heme oxygenase 2 OS=Homo sapiens OX=9606 GN=HMOX2 PE=1 SV=2;tr|A0A087WT44|A0A087WT44_HUMAN Heme oxygenase (biliverdin-producing) OS=Homo sapiens OX=9606 GN=HMOX2 PE=1 SV=1;tr|I3L159|I3L159_HUMAN Heme oxygenase (biliverdin-producing) (
26.6875	27.2551	26.9402	26.6804	26.8348	26.5318	26.5485	26.4086	26.6344	26.0133	26.2479	26.5407	26.8862	26.4144	NaN	+	3NT_Control	6	6	6	32	32	32	24.347	0	97.178	1666800000	52	26.616	26.8796	26.4273	26.5223	14	5	5	4	0.0178361	0.45233	2.97129	Q9UL25	Q9UL25	Ras-related protein Rab-21	RAB21	3808	sp|Q9UL25|RAB21_HUMAN Ras-related protein Rab-21 OS=Homo sapiens OX=9606 GN=RAB21 PE=1 SV=3
27.5045	27.4334	27.7815	28.1766	28.2289	26.8968	27.439	27.1637	27.4904	27.6137	27.2812	26.9062	27.2024	27.5228	NaN	+	3NT_Control	9	9	9	57.8	57.8	57.8	24.579	0	40.859	4823300000	133	27.4744	27.825	27.3207	27.2281	14	5	5	4	0.0427174	0.504224	2.40685	P00492	P00492	Hypoxanthine-guanine phosphoribosyltransferase	HPRT1	1621	sp|P00492|HPRT_HUMAN Hypoxanthine-guanine phosphoribosyltransferase OS=Homo sapiens OX=9606 GN=HPRT1 PE=1 SV=2
29.7551	29.86	29.7913	30.1403	29.9628	29.0581	29.6079	29.5164	29.4296	29.3336	29.5686	29.5162	29.397	29.3194	NaN	+	3NT_Control	11	11	6	97.4	97.4	50.4	11.665	0	232.08	23044000000	229	29.5897	29.9019	29.3891	29.4503	14	5	5	4	0.00235761	0.512776	4.3772	P05387	P05387	60S acidic ribosomal protein P2	RPLP2	1669	sp|P05387|RLA2_HUMAN 60S acidic ribosomal protein P2 OS=Homo sapiens OX=9606 GN=RPLP2 PE=1 SV=1
26.747	26.6179	26.8968	26.9597	26.905	25.9665	26.5612	26.2605	26.5497	26.1782	NaN	25.4878	26.0683	25.8802	NaN	+	3NT_Control	8	8	8	37.6	37.6	37.6	27.626	0	51.626	2439400000	68	26.3907	26.8253	26.3032	25.8121	13	5	5	3	0.00382458	0.522053	4.02311	Q9NX40;D6RG39;D6RIT9;D6R918;D6RBC5;D6RDI5;D6RA54;D6RC55;D6RDK6;D6RBN5;D6RF07;D6RI08;D6RDK1;D6RIV2;D6R9T5	Q9NX40;D6RG39;D6RIT9;D6R918;D6RBC5;D6RDI5;D6RA54;D6RC55;D6RDK6;D6RBN5	OCIA domain-containing protein 1	OCIAD1	3681	sp|Q9NX40|OCAD1_HUMAN OCIA domain-containing protein 1 OS=Homo sapiens OX=9606 GN=OCIAD1 PE=1 SV=1;tr|D6RG39|D6RG39_HUMAN OCIA domain-containing protein 1 (Fragment) OS=Homo sapiens OX=9606 GN=OCIAD1 PE=1 SV=1;tr|D6RIT9|D6RIT9_HUMAN OCIA domain-containing
25.9448	25.521	25.7425	26.203	25.8649	25.5725	25.3538	25.6377	25.2889	24.7758	26.3981	26.4574	26.9692	25.6373	NaN	+	3NT_Control	11	11	11	8.3	8.3	8.3	208.73	0	58.23	1364500000	69	25.8119	25.8552	25.3257	26.3655	14	5	5	4	0.023277	0.529507	2.79779	P51610;A6NEM2;H7C1C4	P51610;A6NEM2	Host cell factor 1;HCF N-terminal chain 1;HCF N-terminal chain 2;HCF N-terminal chain 3;HCF N-terminal chain 4;HCF N-terminal chain 5;HCF N-terminal chain 6;HCF C-terminal chain 1;HCF C-terminal chain 2;HCF C-terminal chain 3;HCF C-terminal chain 4;HCF C-terminal chain 5;HCF C-terminal chain 6	HCFC1	442	sp|P51610|HCFC1_HUMAN Host cell factor 1 OS=Homo sapiens OX=9606 GN=HCFC1 PE=1 SV=2;tr|A6NEM2|A6NEM2_HUMAN Host cell factor 1 OS=Homo sapiens OX=9606 GN=HCFC1 PE=1 SV=2
27.5105	27.3152	27.1662	27.625	27.6314	26.5865	27.1101	27.1131	26.989	26.6883	27.3789	27.3185	28.0938	27.9925	NaN	+	3NT_Control	14	14	12	59.6	59.6	50	23.593	0	53.141	3369100000	110	27.3228	27.4497	26.8974	27.6959	14	5	5	4	0.00471291	0.552263	3.87425	P20340;F5H3K7;Q9NRW1;C9JU14;F5GX61;J3KR73;C9J0I2;C9JB90	P20340;F5H3K7	Ras-related protein Rab-6A	RAB6A	1896	sp|P20340|RAB6A_HUMAN Ras-related protein Rab-6A OS=Homo sapiens OX=9606 GN=RAB6A PE=1 SV=3;tr|F5H3K7|F5H3K7_HUMAN Ras-related protein Rab-6A (Fragment) OS=Homo sapiens OX=9606 GN=RAB6A PE=1 SV=1
26.9869	27.341	27.3761	27.7833	27.6246	26.1339	27.0548	27.2289	27.1528	26.6535	26.4361	26.9066	26.75	26.8756	NaN	+	3NT_Control	3	3	3	26.6	26.6	26.6	16.648	0	36.665	1461500000	31	27.0217	27.4224	26.8448	26.7421	14	5	5	4	0.0459528	0.57761	2.36008	Q9UHV9	Q9UHV9	Prefoldin subunit 2	PFDN2	3767	sp|Q9UHV9|PFD2_HUMAN Prefoldin subunit 2 OS=Homo sapiens OX=9606 GN=PFDN2 PE=1 SV=1
25.2844	25.6241	26.4781	26.375	25.9879	25.7828	25.2788	25.4882	25.1193	25.0493	NaN	24.7502	25.4119	25.284	NaN	+	3NT_Control	9	9	9	46.3	46.3	46.3	28.082	0	32.727	1003500000	37	25.5318	25.9499	25.3437	25.1487	13	5	5	3	0.0488836	0.606246	2.32047	O15305;H3BV55;H3BRM0;H3BPH4;H3BR08;H3BM92;H3BV34;H3BT06;H3BNY9	O15305;H3BV55;H3BRM0;H3BPH4	Phosphomannomutase 2;Phosphomannomutase	PMM2	1378	sp|O15305|PMM2_HUMAN Phosphomannomutase 2 OS=Homo sapiens OX=9606 GN=PMM2 PE=1 SV=1;tr|H3BV55|H3BV55_HUMAN Phosphomannomutase OS=Homo sapiens OX=9606 GN=PMM2 PE=1 SV=1;tr|H3BRM0|H3BRM0_HUMAN Phosphomannomutase OS=Homo sapiens OX=9606 GN=PMM2 PE=1 SV=1;tr|H
25.6097	25.9569	25.0395	25.969	25.0304	24.9846	24.4037	24.7568	24.9518	25.2996	NaN	25.8467	25.0636	NaN	NaN	+	3NT_Control	4	4	4	16.6	16.6	16.6	43.122	0	50.28	493970000	29	25.2427	25.5211	24.8793	25.4551	12	5	5	2	0.0362536	0.641763	2.51207	P21953	P21953	2-oxoisovalerate dehydrogenase subunit beta, mitochondrial	BCKDHB	1911	sp|P21953|ODBB_HUMAN 2-oxoisovalerate dehydrogenase subunit beta, mitochondrial OS=Homo sapiens OX=9606 GN=BCKDHB PE=1 SV=2
28.8023	29.5156	29.2452	29.479	29.119	27.7876	28.8789	28.9822	28.819	28.4305	27.0253	29.0429	28.3339	28.375	NaN	+	3NT_Control	3	3	3	16.8	16.8	16.8	19.024	0	18.454	3560100000	85	28.7026	29.2322	28.5796	28.1943	14	5	5	4	0.0335361	0.652568	2.56212	Q5VVC8;P62913	Q5VVC8;P62913	60S ribosomal protein L11	RPL11	2413	tr|Q5VVC8|Q5VVC8_HUMAN 60S ribosomal protein L11 OS=Homo sapiens OX=9606 GN=RPL11 PE=1 SV=2;sp|P62913|RL11_HUMAN 60S ribosomal protein L11 OS=Homo sapiens OX=9606 GN=RPL11 PE=1 SV=2
27.0625	27.2847	27.658	27.9743	27.5996	26.0248	27.105	26.9285	27.253	26.7409	26.9434	27.1636	26.7281	26.6153	NaN	+	3NT_Control	7	7	7	34.7	34.7	34.7	31.73	0	88.761	1791700000	44	27.0773	27.5158	26.8104	26.8626	14	5	5	4	0.0291628	0.705394	2.65205	P27105;F8VSL7	P27105	Erythrocyte band 7 integral membrane protein	STOM	1964	sp|P27105|STOM_HUMAN Erythrocyte band 7 integral membrane protein OS=Homo sapiens OX=9606 GN=STOM PE=1 SV=3
26.8377	26.7033	26.6438	26.8591	26.3041	25.5603	25.9249	25.9182	26.4235	25.7172	NaN	25.6337	25.2671	25.3203	NaN	+	3NT_Control	8	6	6	32.5	25.6	25.6	39.171	0	36.316	901740000	34	26.0856	26.6696	25.9088	25.407	13	5	5	3	0.002578	0.760773	4.31076	O75477;B0QZ43	O75477;B0QZ43	Erlin-1	ERLIN1	1496	sp|O75477|ERLN1_HUMAN Erlin-1 OS=Homo sapiens OX=9606 GN=ERLIN1 PE=1 SV=2;tr|B0QZ43|B0QZ43_HUMAN Erlin-1 (Fragment) OS=Homo sapiens OX=9606 GN=ERLIN1 PE=1 SV=1
28.0349	27.5615	27.7979	27.6211	27.6933	26.2119	26.993	27.1491	26.9834	27.4917	25.4394	25.5794	25.2669	25.241	NaN	+	3NT_Control	18	18	18	31.1	31.1	31.1	92.218	0	312.9	5505600000	114	26.7903	27.7417	26.9658	25.3817	14	5	5	4	0.00883671	0.775911	3.43901	Q12864;E7EN24;H0YBL0	Q12864;E7EN24	Cadherin-17	CDH17	2559	sp|Q12864|CAD17_HUMAN Cadherin-17 OS=Homo sapiens OX=9606 GN=CDH17 PE=1 SV=3;tr|E7EN24|E7EN24_HUMAN Cadherin-17 OS=Homo sapiens OX=9606 GN=CDH17 PE=1 SV=1
25.9042	25.731	26.5641	27.9297	26.5306	24.9491	25.6946	25.3213	25.8184	25.8658	NaN	NaN	NaN	NaN	NaN	+	3NT_Control	6	6	6	22.2	22.2	22.2	40.917	0	31.536	778240000	23	26.0309	26.5319	25.5299	NaN	10	5	5	0	0.0456871	1.00205	2.36379	F5H442;Q99816	F5H442;Q99816	Tumor susceptibility gene 101 protein	TSG101	941	tr|F5H442|F5H442_HUMAN Tumor susceptibility gene 101 protein OS=Homo sapiens OX=9606 GN=TSG101 PE=1 SV=1;sp|Q99816|TS101_HUMAN Tumor susceptibility gene 101 protein OS=Homo sapiens OX=9606 GN=TSG101 PE=1 SV=2
27.0566	27.9953	27.6216	28.3623	27.3434	26.2251	26.7203	26.1759	27.2115	26.2864	26.8595	26.3242	26.1391	26.2908	NaN	+	3NT_Control	4	4	4	11.1	11.1	11.1	56.598	0	48.326	2379500000	51	26.9009	27.6759	26.5238	26.4034	14	5	5	4	0.00531518	1.15202	3.78956	Q15758;M0QXM4;M0QX44	Q15758;M0QXM4	Neutral amino acid transporter B(0);Amino acid transporter	SLC1A5	2742	sp|Q15758|AAAT_HUMAN Neutral amino acid transporter B(0) OS=Homo sapiens OX=9606 GN=SLC1A5 PE=1 SV=2;tr|M0QXM4|M0QXM4_HUMAN Amino acid transporter OS=Homo sapiens OX=9606 GN=SLC1A5 PE=1 SV=1
25.7504	25.9433	23.612	26.3459	25.4815	30.4111	26.2091	26.1831	25.6059	25.9356	30.5102	29.7701	30.314	30.4087	NaN			18	18	1	56.3	56.3	4.5	40.234	0	239.07	9798500000	167	27.3201	25.4266	26.869	30.2507	14	5	5	4	0.19141	-1.44237	-1.42704	A0A0G2JRN3;A0A024R6I7;G3V2B9;G3V544;G3V5R8;G3V387;A0A0B4J278	A0A0G2JRN3;A0A024R6I7		SERPINA1	4	tr|A0A0G2JRN3|A0A0G2JRN3_HUMAN Alpha-1-antitrypsin OS=Homo sapiens OX=9606 GN=SERPINA1 PE=1 SV=1;tr|A0A024R6I7|A0A024R6I7_HUMAN Alpha-1-antitrypsin OS=Homo sapiens OX=9606 GN=SERPINA1 PE=1 SV=1
26.3	25.4889	26.236	25.4933	26.5441	28.0253	26.4279	26.1112	26.6854	27.5686	28.1308	27.8677	27.8541	27.9606	NaN			38	38	37	24.6	24.6	23.9	234.71	0	206.49	2762200000	112	26.9067	26.0125	26.9637	27.9533	14	5	5	4	0.0537273	-0.951213	-2.25994	Q9NZM1;H0YD14	Q9NZM1;H0YD14	Myoferlin	MYOF	3711	sp|Q9NZM1|MYOF_HUMAN Myoferlin OS=Homo sapiens OX=9606 GN=MYOF PE=1 SV=1;tr|H0YD14|H0YD14_HUMAN Myoferlin (Fragment) OS=Homo sapiens OX=9606 GN=MYOF PE=1 SV=1
26.1732	25.1793	24.9866	24.5036	25.3266	26.8051	26.0285	25.5581	25.6144	26.2093	25.0535	25.896	26.5456	26.2033	NaN			17	17	17	16.7	16.7	16.7	142.94	0	105.71	1037200000	45	25.7202	25.2339	26.0431	25.9246	14	5	5	4	0.0519429	-0.809223	-2.28158	A0A1W2PQ90;Q92878;A0A494C1B7;E7EN38;A0A494C0Y7;A0A494BZX5;A0A494C122;E7ESD9;H7C0P8;H7C0V2;A0A494BZX8	A0A1W2PQ90;Q92878;A0A494C1B7	DNA repair protein RAD50	RAD50	287	tr|A0A1W2PQ90|A0A1W2PQ90_HUMAN Zinc-hook domain-containing protein OS=Homo sapiens OX=9606 PE=3 SV=2;sp|Q92878|RAD50_HUMAN DNA repair protein RAD50 OS=Homo sapiens OX=9606 GN=RAD50 PE=1 SV=1;tr|A0A494C1B7|A0A494C1B7_HUMAN DNA repair protein RAD50 (Fragment
26.3787	25.4367	25.9629	26.85	26.4173	28.1204	26.5043	26.7535	26.939	26.759	28.7081	27.8113	27.6066	28.0193	NaN			16	15	15	52.8	46.8	46.8	30.777	0	73.361	3338200000	121	27.0191	26.2091	27.0152	28.0363	14	5	5	4	0.0619077	-0.806123	-2.16907	P02647;F8W696	P02647;F8W696	Apolipoprotein A-I;Proapolipoprotein A-I;Truncated apolipoprotein A-I	APOA1	1637	sp|P02647|APOA1_HUMAN Apolipoprotein A-I OS=Homo sapiens OX=9606 GN=APOA1 PE=1 SV=1;tr|F8W696|F8W696_HUMAN Apolipoprotein A-I OS=Homo sapiens OX=9606 GN=APOA1 PE=1 SV=1
25.9058	24.688	25.4799	25.8002	24.196	26.6389	26.0401	25.5335	25.4831	26.2506	26.0887	25.9579	26.0086	25.8985	NaN			11	11	11	18.6	18.6	18.6	86.955	0	67.883	960380000	64	25.7121	25.214	25.9892	25.9884	14	5	5	4	0.0870565	-0.775268	-1.94952	Q06481;E9PQS3	Q06481	Amyloid-like protein 2	APLP2	2517	sp|Q06481|APLP2_HUMAN Amyloid-like protein 2 OS=Homo sapiens OX=9606 GN=APLP2 PE=1 SV=2
27.1674	25.7632	25.2165	24.9858	26.8252	29.0861	25.8702	26.7108	24.4674	27.6553	25.3517	25.6151	26.5919	29.7177	NaN			13	1	1	64.7	23.5	23.5	15.404	0	35.703	2878800000	33	26.5017	25.9916	26.758	26.8191	14	5	5	4	0.416534	-0.766356	-0.856698	P68431	P68431	Histone H3.1	HIST1H3A	2441	sp|P68431|H31_HUMAN Histone H3.1 OS=Homo sapiens OX=9606 GN=H3C1 PE=1 SV=2
26.416	25.3006	26.0114	26.1778	25.876	27.4785	25.6032	26.4015	26.8454	27.1344	27.7231	27.8761	27.644	27.5854	NaN			51	51	51	29.4	29.4	29.4	273.6	0	184.19	3785100000	195	26.7195	25.9564	26.6926	27.7071	14	5	5	4	0.0849968	-0.73622	-1.96501	Q6P2Q9;I3L0J9;I3L3Z8	Q6P2Q9	Pre-mRNA-processing-splicing factor 8	PRPF8	2905	sp|Q6P2Q9|PRP8_HUMAN Pre-mRNA-processing-splicing factor 8 OS=Homo sapiens OX=9606 GN=PRPF8 PE=1 SV=2
25.1462	25.1886	25.478	25.2893	24.94	27.0246	25.6635	25.5973	25.4138	25.6552	27.1635	26.8567	26.9339	26.9421	NaN			11	11	11	28	28	28	54.341	0	59.523	1352300000	75	25.9495	25.2084	25.8709	26.9741	14	5	5	4	0.061591	-0.662476	-2.17237	Q9UHL4;R4GMR2;R4GN05;R4GNE8;R4GMU5	Q9UHL4	Dipeptidyl peptidase 2	DPP7	3764	sp|Q9UHL4|DPP2_HUMAN Dipeptidyl peptidase 2 OS=Homo sapiens OX=9606 GN=DPP7 PE=1 SV=3
26.2374	25.1613	25.8038	25.1483	25.5346	27.1901	26.642	25.5026	25.2197	26.5552	27.337	26.5163	27.3899	26.1625	NaN			10	10	10	22	22	22	61.719	0	68.154	1394500000	51	26.1715	25.5771	26.2219	26.8514	14	5	5	4	0.16662	-0.64487	-1.52154	P30038;Q5TF55	P30038	Delta-1-pyrroline-5-carboxylate dehydrogenase, mitochondrial	ALDH4A1	1992	sp|P30038|AL4A1_HUMAN Delta-1-pyrroline-5-carboxylate dehydrogenase, mitochondrial OS=Homo sapiens OX=9606 GN=ALDH4A1 PE=1 SV=3
25.9022	24.0983	25.3886	24.7133	25.0086	27.2901	24.3489	25.1638	25.4391	26.0125	26.9655	27.1326	27.2367	27.1933	NaN			38	38	38	21.8	21.8	21.8	244.5	0	169.65	2154300000	131	25.8495	25.0222	25.6509	27.132	14	5	5	4	0.30744	-0.628685	-1.09003	O75643;A0A494C1A5	O75643;A0A494C1A5	U5 small nuclear ribonucleoprotein 200 kDa helicase	SNRNP200	1504	sp|O75643|U520_HUMAN U5 small nuclear ribonucleoprotein 200 kDa helicase OS=Homo sapiens OX=9606 GN=SNRNP200 PE=1 SV=2;tr|A0A494C1A5|A0A494C1A5_HUMAN U5 small nuclear ribonucleoprotein 200 kDa helicase (Fragment) OS=Homo sapiens OX=9606 GN=SNRNP200 PE=1 SV
25.3557	25.0083	25.2837	24.3635	24.0786	25.9086	25.5552	25.6682	24.423	25.6471	25.4608	25.1104	24.9186	25.2225	NaN			6	6	6	29.8	29.8	29.8	28.048	0	37.92	760550000	48	25.1431	24.8179	25.4404	25.1781	14	5	5	4	0.126091	-0.622483	-1.70761	Q96DG6	Q96DG6	Carboxymethylenebutenolidase homolog	CMBL	3255	sp|Q96DG6|CMBL_HUMAN Carboxymethylenebutenolidase homolog OS=Homo sapiens OX=9606 GN=CMBL PE=1 SV=1
24.898	24.4363	24.506	25.2703	24.1311	25.9397	24.6223	25.198	25.1955	25.3762	NaN	24.5447	25.6718	NaN	NaN			8	8	8	11.8	11.8	11.8	119.41	0	39.366	519940000	33	24.9825	24.6483	25.2664	25.1083	12	5	5	2	0.0650333	-0.618011	-2.13746	P46379;A0A0G2JK23;A0A024RCR6;A0A0G2JL47;A0A0G2JJM1;X6REW1;F6S6P2;A0A0G2JIA9;F6U341;F6X9W3;F6VEM6;F6TC96;H0Y7K4;F6WML8;A0A1B0GX79;A0A0G2JJ92;H0Y759;A0A0G2JJR8;F6XTU0;F6U1F2;F6UR09;A0A0G2JIB3	P46379;A0A0G2JK23;A0A024RCR6;A0A0G2JL47;A0A0G2JJM1;X6REW1;F6S6P2	Large proline-rich protein BAG6	BAG6;BAT3	8	sp|P46379|BAG6_HUMAN Large proline-rich protein BAG6 OS=Homo sapiens OX=9606 GN=BAG6 PE=1 SV=2;tr|A0A0G2JK23|A0A0G2JK23_HUMAN BCL2-associated athanogene 6 OS=Homo sapiens OX=9606 GN=BAG6 PE=1 SV=1;tr|A0A024RCR6|A0A024RCR6_HUMAN BCL2-associated athanogene 6
27.4731	26.7948	28.2141	25.3561	29.3862	28.4406	27.9986	28.3508	27.5	28.0045	28.3448	27.1754	27.8945	28.7857	NaN			3	3	3	39.5	39.5	39.5	9.0564	0	14.933	3868200000	59	27.8371	27.4448	28.0589	28.0501	14	5	5	4	0.403559	-0.614061	-0.881881	Q9P1F3;Q5SZC9	Q9P1F3	Costars family protein ABRACL	ABRACL	3722	sp|Q9P1F3|ABRAL_HUMAN Costars family protein ABRACL OS=Homo sapiens OX=9606 GN=ABRACL PE=1 SV=1
33.9755	33.8234	33.4781	32.8823	34.492	34.8103	33.9711	34.0131	34.6505	34.1765	35.1408	35.5392	35.4659	35.5172	34.1371			18	18	18	68.9	68.9	68.9	11.367	0	323.31	787670000000	3517	34.4049	33.7303	34.3243	35.1601	15	5	5	5	0.0983796	-0.594028	-1.87018	P62805	P62805	Histone H4	HIST1H4A	2402	sp|P62805|H4_HUMAN Histone H4 OS=Homo sapiens OX=9606 GN=H4C1 PE=1 SV=2
26.5976	26.0761	26.5938	26.9285	27.2135	28.2796	26.1873	26.8104	27.4236	27.6215	27.9611	28.025	28.3634	27.8178	NaN			46	46	42	32	32	29.7	269.76	0	323.31	6303700000	251	27.2785	26.6819	27.2645	28.0418	14	5	5	4	0.187935	-0.582569	-1.43961	Q9Y490	Q9Y490	Talin-1	TLN1	3903	sp|Q9Y490|TLN1_HUMAN Talin-1 OS=Homo sapiens OX=9606 GN=TLN1 PE=1 SV=3
26.0031	25.3661	25.4322	25.1807	26.0485	26.8926	26.4983	25.8223	25.7023	25.9447	26.8431	26.6607	27.0951	26.6824	NaN			4	4	4	37.6	37.6	37.6	14.858	0	27.681	1213700000	58	26.1552	25.6061	26.172	26.8203	14	5	5	4	0.0837215	-0.565904	-1.97479	P05413;S4R371;S4R3A2	P05413;S4R371;S4R3A2	Fatty acid-binding protein, heart	FABP3	1671	sp|P05413|FABPH_HUMAN Fatty acid-binding protein, heart OS=Homo sapiens OX=9606 GN=FABP3 PE=1 SV=4;tr|S4R371|S4R371_HUMAN Fatty acid-binding protein, heart (Fragment) OS=Homo sapiens OX=9606 GN=FABP3 PE=1 SV=1;tr|S4R3A2|S4R3A2_HUMAN Fatty acid-binding prot
27.3427	27.0831	27.5587	27.5322	27.5949	28.8298	26.9733	27.503	28.2522	28.3452	28.9639	28.6573	28.7533	28.6721	NaN			55	55	55	32.7	32.7	32.7	273.42	0	323.31	8295900000	297	28.0044	27.4223	27.9807	28.7617	14	5	5	4	0.142147	-0.558379	-1.62813	P49327;A0A0U1RQF0;A0A0U1RRG3;A0A1B0GTR5;J3KTF0	P49327;A0A0U1RQF0	Fatty acid synthase;[Acyl-carrier-protein] S-acetyltransferase;[Acyl-carrier-protein] S-malonyltransferase;3-oxoacyl-[acyl-carrier-protein] synthase;3-oxoacyl-[acyl-carrier-protein] reductase;3-hydroxyacyl-[acyl-carrier-protein] dehydratase;Enoyl-[acyl-carrier-protein] reductase;Oleoyl-[acyl-carrier-protein] hydrolase	FASN	2192	sp|P49327|FAS_HUMAN Fatty acid synthase OS=Homo sapiens OX=9606 GN=FASN PE=1 SV=3;tr|A0A0U1RQF0|A0A0U1RQF0_HUMAN 3-hydroxyacyl-[acyl-carrier-protein] dehydratase OS=Homo sapiens OX=9606 GN=FASN PE=1 SV=1
30.0321	29.5143	29.6723	29.8693	29.8006	31.234	29.5614	29.8677	30.3826	30.5317	30.7308	30.8391	31.0384	30.9571	NaN			115	115	103	55.3	55.3	50.2	226.53	0	323.31	81310000000	1478	30.288	29.7777	30.3155	30.8914	14	5	5	4	0.112358	-0.537744	-1.78345	P35579;Q5BKV1;B1AH99	P35579	Myosin-9	MYH9	2063	sp|P35579|MYH9_HUMAN Myosin-9 OS=Homo sapiens OX=9606 GN=MYH9 PE=1 SV=4
30.7603	30.3003	29.7294	29.275	30.6219	30.7504	30.667	30.5724	30.5861	30.7474	30.3161	30.447	30.7574	30.7721	NaN			10	10	10	90.8	90.8	90.8	10.044	0	323.31	33296000000	336	30.4502	30.1374	30.6647	30.5732	14	5	5	4	0.0982333	-0.527316	-1.87115	P07108;A0A0A0MTI5;B8ZWD1	P07108;A0A0A0MTI5;B8ZWD1	Acyl-CoA-binding protein	DBI	1687	sp|P07108|ACBP_HUMAN Acyl-CoA-binding protein OS=Homo sapiens OX=9606 GN=DBI PE=1 SV=2;tr|A0A0A0MTI5|A0A0A0MTI5_HUMAN Acyl-CoA-binding protein OS=Homo sapiens OX=9606 GN=DBI PE=1 SV=1;tr|B8ZWD1|B8ZWD1_HUMAN Acyl-CoA-binding protein OS=Homo sapiens OX=9606
30.231	29.3277	29.6118	29.2303	29.8248	30.6311	30.2066	29.8295	29.7539	30.4079	31.2135	30.6044	30.2108	30.2385	NaN			5	3	3	31.2	24.2	24.2	13.509	0	18.699	12576000000	112	30.0944	29.6451	30.1658	30.5668	14	5	5	4	0.0670634	-0.520702	-2.11771	Q71UI9;P0C0S5;C9J0D1;A0A494C189;C9J386	Q71UI9;P0C0S5;C9J0D1;A0A494C189;C9J386	Histone H2A.V;Histone H2A.Z;Histone H2A	H2AFV;H2AFZ	1743	sp|Q71UI9|H2AV_HUMAN Histone H2A.V OS=Homo sapiens OX=9606 GN=H2AZ2 PE=1 SV=3;sp|P0C0S5|H2AZ_HUMAN Histone H2A.Z OS=Homo sapiens OX=9606 GN=H2AZ1 PE=1 SV=2;tr|C9J0D1|C9J0D1_HUMAN Histone H2A OS=Homo sapiens OX=9606 GN=H2AZ2 PE=1 SV=1;tr|A0A494C189|A0A494C1
31.2969	30.0581	30.5091	29.5091	30.1364	30.3526	31.223	31.0602	30.2451	31.1435	NaN	29.4552	29.1817	29.4216	NaN			3	3	3	14.7	14.7	14.7	23.418	0	69.743	10117000000	72	30.2763	30.3019	30.8049	29.3528	13	5	5	3	0.202154	-0.502945	-1.38941	Q96HR9;A8MXN1	Q96HR9	Receptor expression-enhancing protein 6	REEP6	3287	sp|Q96HR9|REEP6_HUMAN Receptor expression-enhancing protein 6 OS=Homo sapiens OX=9606 GN=REEP6 PE=1 SV=2
26.814	26.1324	25.8002	25.8479	26.0058	26.5703	27.0343	26.4871	26.2057	26.7996	26.1004	26.3187	26.3139	26.3396	NaN			12	12	12	25	25	25	67.887	0	53.796	1533100000	62	26.3407	26.12	26.6194	26.2682	14	5	5	4	0.0625809	-0.499358	-2.16213	Q9HD45;Q5TB53	Q9HD45;Q5TB53	Transmembrane 9 superfamily member 3	TM9SF3	3590	sp|Q9HD45|TM9S3_HUMAN Transmembrane 9 superfamily member 3 OS=Homo sapiens OX=9606 GN=TM9SF3 PE=1 SV=2;tr|Q5TB53|Q5TB53_HUMAN Transmembrane 9 superfamily member (Fragment) OS=Homo sapiens OX=9606 GN=TM9SF3 PE=1 SV=8
27.3277	26.2794	26.8093	26.5866	27.244	27.7732	27.4579	27.2985	27.1273	27.0754	27.0555	26.6235	27.2704	26.7812	NaN			4	4	4	23.3	23.3	23.3	33.295	0	92.05	1810600000	38	27.0507	26.8494	27.3465	26.9327	14	5	5	4	0.0667276	-0.497052	-2.12094	P50135	P50135	Histamine N-methyltransferase	HNMT	2220	sp|P50135|HNMT_HUMAN Histamine N-methyltransferase OS=Homo sapiens OX=9606 GN=HNMT PE=1 SV=1
29.594	29.1796	29.2313	29.616	29.4086	30.7965	29.1482	29.3305	29.9246	30.2333	30.6584	30.2813	30.5287	30.5147	27.3568			138	138	130	72.2	72.2	70	278.16	0	323.31	119430000000	2150	29.7202	29.4059	29.8866	29.868	15	5	5	5	0.163676	-0.480716	-1.53358	O75369;E7EN95;H7C5L4;A0A0A0MT44;A0A0C4DGA1	O75369;E7EN95	Filamin-B	FLNB	1488	sp|O75369|FLNB_HUMAN Filamin-B OS=Homo sapiens OX=9606 GN=FLNB PE=1 SV=2;tr|E7EN95|E7EN95_HUMAN Filamin-B OS=Homo sapiens OX=9606 GN=FLNB PE=1 SV=1
26.8324	26.6204	26.483	26.7648	26.3528	28.1847	27.0091	26.6356	26.7334	26.8431	28.1331	27.9897	28.3199	27.9785	NaN			15	15	8	30.6	30.6	14.1	61.999	0	109.99	3476100000	118	27.2058	26.6107	27.0812	28.1053	14	5	5	4	0.150889	-0.470478	-1.58827	H3BP20;P06865;H3BS10;H3BU85;A0A087WUJ7;H3BRP6;A0A087WTY2;H3BVH8;H3BT62;H3BQ04	H3BP20;P06865;H3BS10	Beta-hexosaminidase;Beta-hexosaminidase subunit alpha	HEXA	1109	tr|H3BP20|H3BP20_HUMAN Beta-hexosaminidase OS=Homo sapiens OX=9606 GN=HEXA PE=1 SV=1;sp|P06865|HEXA_HUMAN Beta-hexosaminidase subunit alpha OS=Homo sapiens OX=9606 GN=HEXA PE=1 SV=2;tr|H3BS10|H3BS10_HUMAN Beta-hexosaminidase OS=Homo sapiens OX=9606 GN=HEXA
27.6634	28.1094	27.3371	27.3598	28.8618	27.8355	27.7284	28.0095	28.9064	29.193	30.3044	30.0397	29.6782	29.8655	NaN			8	8	8	60.7	60.7	60.7	10.058	0	32.432	10477000000	103	28.6351	27.8663	28.3346	29.972	14	5	5	4	0.289869	-0.46828	-1.1334	O75531	O75531	Barrier-to-autointegration factor;Barrier-to-autointegration factor, N-terminally processed	BANF1	1499	sp|O75531|BAF_HUMAN Barrier-to-autointegration factor OS=Homo sapiens OX=9606 GN=BANF1 PE=1 SV=1
27.0611	26.8971	27.0187	26.5445	26.8686	28.1564	26.3816	27.1668	27.4028	27.5934	27.8496	27.9347	28.2464	28.1579	NaN			86	86	86	25.7	25.7	25.7	469.08	0	323.31	9899100000	419	27.3771	26.878	27.3402	28.0472	14	5	5	4	0.166896	-0.462206	-1.52042	P78527;H0YG84	P78527	DNA-dependent protein kinase catalytic subunit	PRKDC	2449	sp|P78527|PRKDC_HUMAN DNA-dependent protein kinase catalytic subunit OS=Homo sapiens OX=9606 GN=PRKDC PE=1 SV=3
26.1289	25.7294	26.0025	26.5687	26.0102	27.3851	25.7391	26.0492	26.638	26.9068	26.974	27.4799	27.2158	26.9979	NaN			44	44	44	29.4	29.4	29.4	236.16	0	323.31	4398000000	178	26.559	26.088	26.5436	27.1669	14	5	5	4	0.198747	-0.455671	-1.40115	A0A087WY61;Q14980;F5H4J1;H0YFY6;F5H6Y5;K4DIE0;F5H0Z7;F5H763;F5H1L0;F5GZW1;F5H2F3;F5H3L6;F8W6T3;F5GWK2;F5H073;F5H068	A0A087WY61;Q14980	Nuclear mitotic apparatus protein 1	NUMA1	67	tr|A0A087WY61|A0A087WY61_HUMAN Nuclear mitotic apparatus protein 1 OS=Homo sapiens OX=9606 GN=NUMA1 PE=1 SV=1;sp|Q14980|NUMA1_HUMAN Nuclear mitotic apparatus protein 1 OS=Homo sapiens OX=9606 GN=NUMA1 PE=1 SV=2
25.4449	25.5002	25.061	25.7485	25.2832	26.1629	25.4111	26.0426	26.2243	25.4385	26.0553	26.1824	NaN	25.8784	NaN			5	5	5	30.6	30.6	30.6	20.9	0	20.296	626020000	18	25.7256	25.4076	25.8559	26.0387	13	5	5	3	0.0673572	-0.448308	-2.1149	P61081;M0QX69;M0QYI6	P61081	NEDD8-conjugating enzyme Ubc12	UBE2M	2347	sp|P61081|UBC12_HUMAN NEDD8-conjugating enzyme Ubc12 OS=Homo sapiens OX=9606 GN=UBE2M PE=1 SV=1
26.4662	25.8933	25.8457	25.066	25.5502	26.3828	26.4728	25.552	26.1863	26.4503	25.8986	26.4116	25.6946	25.9758	NaN			6	6	6	37.3	37.3	37.3	19.968	0	82.483	1719300000	94	25.989	25.7643	26.2088	25.9951	14	5	5	4	0.1591	-0.444543	-1.55269	A0A2R8YEM3;E7EQV9;E7ENU7;P61313;E7EX53;A0A2R8Y738	A0A2R8YEM3;E7EQV9;E7ENU7;P61313;E7EX53;A0A2R8Y738	Ribosomal protein L15;60S ribosomal protein L15	RPL15	333	tr|A0A2R8YEM3|A0A2R8YEM3_HUMAN Ribosomal protein L15 (Fragment) OS=Homo sapiens OX=9606 GN=RPL15 PE=1 SV=1;tr|E7EQV9|E7EQV9_HUMAN Ribosomal protein L15 (Fragment) OS=Homo sapiens OX=9606 GN=RPL15 PE=1 SV=1;tr|E7ENU7|E7ENU7_HUMAN Ribosomal protein L15 (Frag
33.1509	32.3748	32.5945	31.7558	32.9652	33.7306	32.8873	32.8136	32.707	32.895	33.5833	33.721	33.8244	33.88	31.4344			13	13	1	64.7	64.7	23.5	15.388	0	124.95	122970000000	1402	32.9545	32.5683	33.0067	33.2886	15	5	5	5	0.189874	-0.438438	-1.43257	Q71DI3	Q71DI3	Histone H3.2	HIST2H3A	2939	sp|Q71DI3|H32_HUMAN Histone H3.2 OS=Homo sapiens OX=9606 GN=H3C15 PE=1 SV=3
27.4723	27.3308	27.5001	27.4724	27.7347	28.6273	27.6451	27.9242	27.7405	27.7234	27.5278	27.8865	28.1514	27.7902	NaN			5	5	5	51.8	51.8	51.8	12.656	0	101.59	4091400000	84	27.7519	27.5021	27.9321	27.839	14	5	5	4	0.0546496	-0.43004	-2.24903	E5RI99;P62888;A0A0B4J213;E5RJH3;A0A0C4DH44	E5RI99;P62888	60S ribosomal protein L30	RPL30	786	tr|E5RI99|E5RI99_HUMAN 60S ribosomal protein L30 (Fragment) OS=Homo sapiens OX=9606 GN=RPL30 PE=1 SV=1;sp|P62888|RL30_HUMAN 60S ribosomal protein L30 OS=Homo sapiens OX=9606 GN=RPL30 PE=1 SV=2
32.1781	31.8748	31.6684	31.3845	32.185	32.7869	32.0095	32.0479	32.4173	32.1383	33.2735	33.3966	33.2105	33.4734	NaN			9	1	1	34.6	8.1	8.1	15.43	0	10.857	49885000000	179	32.4318	31.8582	32.28	33.3385	14	5	5	4	0.0809728	-0.421804	-1.99635	Q5TEC6;A0A590UJL8	Q5TEC6	Histone H3	HIST2H3PS2	2866	tr|Q5TEC6|Q5TEC6_HUMAN Histone H3 OS=Homo sapiens OX=9606 GN=H3-2 PE=1 SV=1
28.7413	27.9401	28.1278	27.0994	27.9352	28.1896	28.857	28.2558	27.8984	28.7504	26.2848	27.5515	27.3839	27.0984	NaN			19	19	14	45	45	32.1	24.033	0	201.67	9113000000	256	27.8653	27.9688	28.3903	27.0797	14	5	5	4	0.222163	-0.421487	-1.32374	P26583;D6R9A6	P26583;D6R9A6	High mobility group protein B2	HMGB2	1960	sp|P26583|HMGB2_HUMAN High mobility group protein B2 OS=Homo sapiens OX=9606 GN=HMGB2 PE=1 SV=2;tr|D6R9A6|D6R9A6_HUMAN High mobility group protein B2 (Fragment) OS=Homo sapiens OX=9606 GN=HMGB2 PE=1 SV=1
29.9948	29.5046	29.5852	29.5535	29.5862	30.7607	30.1504	29.7755	29.6175	29.9816	30.2712	30.188	30.2458	30.0769	NaN			17	17	17	51.8	51.8	51.8	38.324	0	144.11	14845000000	244	29.9494	29.6449	30.0571	30.1955	14	5	5	4	0.0936623	-0.412265	-1.90211	Q00796;A0A6I8PIS1;H0YKB3;A0A6I8PRA7	Q00796;A0A6I8PIS1	Sorbitol dehydrogenase	SORD	2478	sp|Q00796|DHSO_HUMAN Sorbitol dehydrogenase OS=Homo sapiens OX=9606 GN=SORD PE=1 SV=4;tr|A0A6I8PIS1|A0A6I8PIS1_HUMAN Sorbitol dehydrogenase OS=Homo sapiens OX=9606 GN=SORD PE=4 SV=1
29.4843	29.3097	29.5644	29.8204	29.457	30.3542	29.2288	29.5166	30.2475	30.3387	30.3166	30.2784	30.241	30.3398	NaN			116	116	107	59.4	59.4	55.3	274.61	0	323.31	71273000000	1443	29.8927	29.5272	29.9372	30.294	14	5	5	4	0.139841	-0.410001	-1.63902	Q01082;A0A087WUZ3;F8W6C1;A4QPE4	Q01082;A0A087WUZ3	Spectrin beta chain, non-erythrocytic 1	SPTBN1	2479	sp|Q01082|SPTB2_HUMAN Spectrin beta chain, non-erythrocytic 1 OS=Homo sapiens OX=9606 GN=SPTBN1 PE=1 SV=2;tr|A0A087WUZ3|A0A087WUZ3_HUMAN Spectrin beta chain OS=Homo sapiens OX=9606 GN=SPTBN1 PE=1 SV=1
27.4067	26.7114	26.7873	25.7834	25.8263	26.3427	27.6674	26.6357	27.0087	26.8963	26.4482	25.2397	26.3547	26.304	NaN			12	12	7	33	33	20.6	45.835	0	65.949	1990100000	90	26.5295	26.503	26.9102	26.0866	14	5	5	4	0.31593	-0.407163	-1.06978	B4DR80;Q9Y6E0;H0Y630;Q5JV98;Q5JV99	B4DR80;Q9Y6E0;H0Y630	Serine/threonine-protein kinase 24;Serine/threonine-protein kinase 24 36 kDa subunit;Serine/threonine-protein kinase 24 12 kDa subunit	STK24	520	tr|B4DR80|B4DR80_HUMAN Serine/threonine-protein kinase 24 OS=Homo sapiens OX=9606 GN=STK24 PE=1 SV=1;sp|Q9Y6E0|STK24_HUMAN Serine/threonine-protein kinase 24 OS=Homo sapiens OX=9606 GN=STK24 PE=1 SV=1;tr|H0Y630|H0Y630_HUMAN Serine/threonine-protein kinase
27.2065	26.4092	26.9111	26.2183	26.5016	26.1871	27.1319	27.3285	26.8867	27.7355	26.4351	26.507	26.5029	25.8486	NaN			16	15	15	27.7	26	26	73.155	0	86.617	2434000000	56	26.7007	26.6494	27.054	26.3234	14	5	5	4	0.233314	-0.404603	-1.28932	A0A2R8YFS5;A0A2R8Y5G6;O00571;A0A2R8YFR4;A0A0D9SF53;A0A0D9SG12;A0A2R8Y645;A0A2R8YCW1;A0A2R8YF78;A0A2R8Y4A4;A0A0D9SFB3;A0A2U3TZJ9;A0A2R8Y7T2;A0A2R8YDT5;O15523;F6S8Q4;A0A2R8YDH3;A0A0J9YVQ7;A0A087WVZ1;C9J081;C9J8G5;A0A2R8Y4D2;D6RCM4;A0A2R8YCU0;A0A2R8Y650;Q9NQI0	A0A2R8YFS5;A0A2R8Y5G6;O00571;A0A2R8YFR4;A0A0D9SF53;A0A0D9SG12;A0A2R8Y645;A0A2R8YCW1;A0A2R8YF78;A0A2R8Y4A4;A0A0D9SFB3;A0A2U3TZJ9;A0A2R8Y7T2;A0A2R8YDT5;O15523;F6S8Q4;A0A2R8YDH3	ATP-dependent RNA helicase DDX3X;ATP-dependent RNA helicase DDX3Y	DDX3X;DDX3Y	210	tr|A0A2R8YFS5|A0A2R8YFS5_HUMAN RNA helicase OS=Homo sapiens OX=9606 GN=DDX3X PE=1 SV=1;tr|A0A2R8Y5G6|A0A2R8Y5G6_HUMAN RNA helicase OS=Homo sapiens OX=9606 GN=DDX3X PE=1 SV=1;sp|O00571|DDX3X_HUMAN ATP-dependent RNA helicase DDX3X OS=Homo sapiens OX=9606 GN=
26.9339	27.2838	26.3315	25.9169	28.0483	28.153	26.9037	27.0737	27.5656	26.8367	28.0034	28.3753	27.3879	27.6162	NaN			5	5	5	53.3	53.3	53.3	14.494	0	47.542	1855500000	37	27.3164	26.9029	27.3065	27.8457	14	5	5	4	0.391883	-0.403611	-0.905043	P52758;H0YBX3;H0YB34	P52758;H0YBX3;H0YB34	Ribonuclease UK114	HRSP12	2264	sp|P52758|RIDA_HUMAN 2-iminobutanoate/2-iminopropanoate deaminase OS=Homo sapiens OX=9606 GN=RIDA PE=1 SV=1;tr|H0YBX3|H0YBX3_HUMAN 2-iminobutanoate/2-iminopropanoate deaminase (Fragment) OS=Homo sapiens OX=9606 GN=RIDA PE=1 SV=1;tr|H0YB34|H0YB34_HUMAN 2-im
30.4889	30.1391	30.0786	29.4537	30.4377	31.0635	30.2672	30.2542	30.425	30.5898	30.7797	31.0684	31.3535	31.2561	NaN			7	7	7	57.7	57.7	57.7	11.203	0	160.87	36573000000	410	30.5468	30.1196	30.5199	31.1144	14	5	5	4	0.130189	-0.400328	-1.68648	P60903	P60903	Protein S100-A10	S100A10	2337	sp|P60903|S10AA_HUMAN Protein S100-A10 OS=Homo sapiens OX=9606 GN=S100A10 PE=1 SV=2
25.5842	25.4679	25.6447	25.8309	25.3531	27.0806	25.3603	25.6381	25.5206	26.2675	27.0512	26.8207	27.1255	26.8005	NaN			5	5	5	72.8	72.8	72.8	12.774	0	19.598	834620000	37	26.1104	25.5762	25.9734	26.9495	14	5	5	4	0.258906	-0.39724	-1.21528	O75368	O75368	SH3 domain-binding glutamic acid-rich-like protein	SH3BGRL	1487	sp|O75368|SH3L1_HUMAN SH3 domain-binding glutamic acid-rich-like protein OS=Homo sapiens OX=9606 GN=SH3BGRL PE=1 SV=1
[truncated: 1,586 more rows]

## Sheet: Down in 3NT
LFQ intensity 3NT_1	LFQ intensity 3NT_2	LFQ intensity 3NT_3	LFQ intensity 3NT_4	LFQ intensity 3NT_5	LFQ intensity C_1	LFQ intensity C_2	LFQ intensity C_3	LFQ intensity C_4	LFQ intensity C_5	LFQ intensity EA_1	LFQ intensity EA_2	LFQ intensity EA_3	LFQ intensity EA_4	LFQ intensity EA_5	C: Student's T-test Significant 3NT_Control	C: Student's T-test significant	N: Peptides	N: Razor + unique peptides	N: Unique peptides	N: Sequence coverage [%]	N: Unique + razor sequence coverage [%]	N: Unique sequence coverage [%]	N: Mol. weight [kDa]	N: Q-value	N: Score	N: Intensity	N: MS/MS count	N: Mean	N: Mean 3NT	N: Mean Control	N: Mean 3NT+EA	N: Valid values	N: Valid values 3NT	N: Valid values Control	N: Valid values 3NT+EA	N: Student's T-test p-value 3NT_Control	N: Student's T-test Difference 3NT_Control	FOLD CHANGE (2 Student's T-test Difference)	N: Student's T-test Test statistic 3NT_Control	T: Protein IDs	T: Majority protein IDs	T: Protein names	T: Gene names	T: id	T: Fasta headers
[truncated: 56 more rows]

[truncated: 3 more sheets: up in 3 NT, Only in C, Only in 3NT]
