# Supplementary material for: Ellagic Acid Triggers the Necrosis of Differentiated Human Enterocytes Exposed to 3-Nitro-Tyrosine: An MS-Based Proteomic Study
Source: Antioxidants (Basel). 2022 Dec 17;11(12):2485. doi: 10.3390/antiox11122485 (PMC9774974; doi:10.3390/antiox11122485)
Supplement: Supplementary file 1 [file antioxidants-11-02485-s001.zip › Table S2.xls]

## Sheet: ClueGO Results
ID	Term	Ontology Source	Term PValue	Term PValue Corrected with Bonferroni step down	Group PValue	Group PValue Corrected with Bonferroni step down	GOLevels	GOGroups	% Associated Genes	Nr. Genes	Associated Genes Found
GO:0000281	mitotic cytokinesis	GO_BiologicalProcess-EBI-UniProt-GOA_17.02.2020_00h00	0.000571437	0.00285719	0.000571437	0.00114287	[4, 5, 6]	Group0	4.3956	4	[MYH10, ROCK2, SNX9, STAMBP]
GO:0006334	nucleosome assembly	GO_BiologicalProcess-EBI-UniProt-GOA_17.02.2020_00h00	5.09832e-06	5.09832e-05	5.09832e-06	2.03933e-05	[5, 6, 7, 8]	Group1	4.32099	7	[H2BC13, H2BC14, H2BC15, H2BC18, H2BC5, H2BC9, SMARCA5]
GO:0002183	cytoplasmic translational initiation	GO_BiologicalProcess-EBI-UniProt-GOA_17.02.2020_00h00	0.000767285	0.00306914	0.00254282	0.00254282	[4, 7, 8, 9]	Group2	6.97674	3	[EIF2S3, EIF2S3B, EIF3D]
GO:0003743	translation initiation factor activity	GO_BiologicalProcess-EBI-UniProt-GOA_17.02.2020_00h00	0.00232561	0.00465122	0.00254282	0.00254282	[4, 7, 8, 9, 10, 11]	Group2	4.7619	3	[EIF2S3, EIF2S3B, EIF3D]
GO:0002504	antigen processing and presentation of peptide or polysaccharide antigen via MHC class II	GO_BiologicalProcess-EBI-UniProt-GOA_17.02.2020_00h00	0.000164108	0.00131286	0.00023993	0.000719791	[3]	Group3	4.06504	5	[ACTR1B, AP1S1, CAPZB, DCTN1, DYNC1H1]
GO:0051653	spindle localization	GO_BiologicalProcess-EBI-UniProt-GOA_17.02.2020_00h00	0.00289148	0.00289148	0.00023993	0.000719791	[3, 4]	Group3	4.41176	3	[ACTR1B, DCTN1, DYNC1H1]
GO:0002495	antigen processing and presentation of peptide antigen via MHC class II	GO_BiologicalProcess-EBI-UniProt-GOA_17.02.2020_00h00	0.000164108	0.00131286	0.00023993	0.000719791	[4]	Group3	4.06504	5	[ACTR1B, AP1S1, CAPZB, DCTN1, DYNC1H1]
GO:0051647	nucleus localization	GO_BiologicalProcess-EBI-UniProt-GOA_17.02.2020_00h00	0.000491856	0.00295114	0.00023993	0.000719791	[4]	Group3	8.10811	3	[ACTR1B, DYNC1H1, MYH10]
GO:0007097	nuclear migration	GO_BiologicalProcess-EBI-UniProt-GOA_17.02.2020_00h00	0.000318723	0.00223106	0.00023993	0.000719791	[4, 5]	Group3	9.375	3	[ACTR1B, DYNC1H1, MYH10]
GO:0019886	antigen processing and presentation of exogenous peptide antigen via MHC class II	GO_BiologicalProcess-EBI-UniProt-GOA_17.02.2020_00h00	0.000140524	0.00126471	0.00023993	0.000719791	[5]	Group3	4.20168	5	[ACTR1B, AP1S1, CAPZB, DCTN1, DYNC1H1]
GO:0051293	establishment of spindle localization	GO_BiologicalProcess-EBI-UniProt-GOA_17.02.2020_00h00	0.00202208	0.00606623	0.00023993	0.000719791	[4, 5, 6]	Group3	5	3	[ACTR1B, DCTN1, DYNC1H1]
