# Supplementary material for: Ellagic Acid Triggers the Necrosis of Differentiated Human Enterocytes Exposed to 3-Nitro-Tyrosine: An MS-Based Proteomic Study
Source: Antioxidants (Basel). 2022 Dec 17;11(12):2485. doi: 10.3390/antiox11122485 (PMC9774974; doi:10.3390/antiox11122485)
Supplement: Supplementary file 1 [file antioxidants-11-02485-s001.zip › Table S4.xls]

## Sheet: ClueGO Results
ID	Term	Ontology Source	Term PValue	Term PValue Corrected with Bonferroni step down	Group PValue	Group PValue Corrected with Bonferroni step down	GOLevels	GOGroups	% Associated Genes	Nr. Genes	Associated Genes Found
GO:0003743	translation initiation factor activity	GO_MolecularFunction-EBI-UniProt-GOA_17.02.2020_00h00	0.0022876	0.0022876	0.0022876	0.0022876	[4, 6]	Group0	4.7619	3	[EIF2S3, EIF2S3B, EIF3D]
GO:0048156	tau protein binding	GO_MolecularFunction-EBI-UniProt-GOA_17.02.2020_00h00	0.00180408	0.00360816	0.00180408	0.00360816	[4]	Group1	5.17241	3	[DCTN1, GSK3B, ROCK2]
GO:0016860	intramolecular oxidoreductase activity	GO_MolecularFunction-EBI-UniProt-GOA_17.02.2020_00h00	0.000144607	0.000433821	0.000144607	0.000433821	[3]	Group2	6.25	4	[DDT, DDTL, HSD3B1, HSD3B2]
GO:0016863	intramolecular oxidoreductase activity, transposing C=C bonds	GO_MolecularFunction-EBI-UniProt-GOA_17.02.2020_00h00	1.89967e-06	7.59867e-06	0.000144607	0.000433821	[4]	Group2	18.1818	4	[DDT, DDTL, HSD3B1, HSD3B2]
