# Supplementary material for: Ellagic Acid Triggers the Necrosis of Differentiated Human Enterocytes Exposed to 3-Nitro-Tyrosine: An MS-Based Proteomic Study
Source: Antioxidants (Basel). 2022 Dec 17;11(12):2485. doi: 10.3390/antiox11122485 (PMC9774974; doi:10.3390/antiox11122485)
Supplement: Supplementary file 1 [file antioxidants-11-02485-s001.zip › Table S5.xls]

## Sheet: ClueGO Results
ID	Term	Ontology Source	Term PValue	Term PValue Corrected with Bonferroni step down	Group PValue	Group PValue Corrected with Bonferroni step down	GOLevels	GOGroups	% Associated Genes	Nr. Genes	Associated Genes Found
GO:0034332	adherens junction organization	GO_BiologicalProcess-EBI-UniProt-GOA_17.02.2020_00h00	0.000421735	0.0134955	0.000421735	0.00210868	[5]	Group0	5.26316	4	[CDH1, CDH17, NRBP1, TJP1]
GO:0043954	cellular component maintenance	GO_BiologicalProcess-EBI-UniProt-GOA_17.02.2020_00h00	0.0046835	0.00936699	0.0046835	0.00936699	[3]	Group1	4.10959	3	[SUPV3L1, TJP1, TXNRD1]
GO:0045292	mRNA cis splicing, via spliceosome	GO_BiologicalProcess-EBI-UniProt-GOA_17.02.2020_00h00	4.99203e-05	0.00244609	4.99203e-05	0.000349442	[8, 9, 10, 11, 12]	Group2	9.09091	4	[RBM4, RBM4B, SNRPC, SRSF9]
GO:0046685	response to arsenic-containing substance	GO_BiologicalProcess-EBI-UniProt-GOA_17.02.2020_00h00	0.00150209	0.0255356	0.00150209	0.00450628	[3]	Group3	6.12245	3	[PPIF, RBM4, VCP]
GO:0055106	ubiquitin-protein transferase regulator activity	GO_BiologicalProcess-EBI-UniProt-GOA_17.02.2020_00h00	0.000389069	0.0132283	0.000389069	0.00233441	[5]	Group4	9.67742	3	[AUP1, CDH1, RPL11]
GO:1903902	positive regulation of viral life cycle	GO_BiologicalProcess-EBI-UniProt-GOA_17.02.2020_00h00	0.000537417	0.0150477	0.000537417	0.00214967	[6, 7]	Group5	4.93827	4	[CHMP4A, STOM, TSG101, VAPB]
GO:0006900	vesicle budding from membrane	GO_BiologicalProcess-EBI-UniProt-GOA_17.02.2020_00h00	2.13491e-05	0.00111015	2.13491e-05	0.000192142	[4, 5]	Group6	4.91803	6	[CALM2, CALM3, CHMP4A, SEC22B, STX5, VAPB]
GO:0042273	ribosomal large subunit biogenesis	GO_BiologicalProcess-EBI-UniProt-GOA_17.02.2020_00h00	0.00061676	0.015419	2.5634e-05	0.000205072	[4, 5]	Group7	4.7619	4	[FTSJ3, NOP2, RPL11, RSL1D1]
GO:0042255	ribosome assembly	GO_BiologicalProcess-EBI-UniProt-GOA_17.02.2020_00h00	0.000512668	0.01538	2.5634e-05	0.000205072	[5]	Group7	5	4	[C1QBP, NOP2, RPL11, RPS14]
GO:0000470	maturation of LSU-rRNA	GO_BiologicalProcess-EBI-UniProt-GOA_17.02.2020_00h00	0.000559016	0.0150934	2.5634e-05	0.000205072	[5, 6, 8, 9, 10]	Group7	8.57143	3	[FTSJ3, NOP2, RSL1D1]
GO:0050775	positive regulation of dendrite morphogenesis	GO_BiologicalProcess-EBI-UniProt-GOA_17.02.2020_00h00	0.00323213	0.0258571	0.183079	0.183079	[7, 8, 9, 10, 11, 12, 13]	Group8	4.6875	3	[CALM1, CALM3, RAB21]
GO:0043539	protein serine/threonine kinase activator activity	GO_BiologicalProcess-EBI-UniProt-GOA_17.02.2020_00h00	0.00159268	0.0254829	0.183079	0.183079	[8, 9, 10, 11, 12, 13]	Group8	6	3	[CALM1, CALM2, CALM3]
GO:0007190	activation of adenylate cyclase activity	GO_BiologicalProcess-EBI-UniProt-GOA_17.02.2020_00h00	0.0023231	0.0255541	0.183079	0.183079	[4]	Group8	5.26316	3	[CALM1, CALM2, CALM3]
GO:0097366	response to bronchodilator	GO_BiologicalProcess-EBI-UniProt-GOA_17.02.2020_00h00	0.000307795	0.0110806	0.183079	0.183079	[4]	Group8	5.71429	4	[CALM1, CALM2, CALM3, HPRT1]
GO:0044275	cellular carbohydrate catabolic process	GO_BiologicalProcess-EBI-UniProt-GOA_17.02.2020_00h00	0.00159268	0.0254829	0.183079	0.183079	[4, 5]	Group8	6	3	[CALM1, CALM2, CALM3]
GO:0051284	positive regulation of sequestering of calcium ion	GO_BiologicalProcess-EBI-UniProt-GOA_17.02.2020_00h00	0.00011902	0.0052369	0.183079	0.183079	[4, 5]	Group8	14.2857	3	[CALM1, CALM2, CALM3]
GO:0000272	polysaccharide catabolic process	GO_BiologicalProcess-EBI-UniProt-GOA_17.02.2020_00h00	0.000286404	0.010597	0.183079	0.183079	[5]	Group8	10.7143	3	[CALM1, CALM2, CALM3]
GO:0001975	response to amphetamine	GO_BiologicalProcess-EBI-UniProt-GOA_17.02.2020_00h00	4.99203e-05	0.00244609	0.183079	0.183079	[4, 5, 6]	Group8	9.09091	4	[CALM1, CALM2, CALM3, HPRT1]
GO:0005513	detection of calcium ion	GO_BiologicalProcess-EBI-UniProt-GOA_17.02.2020_00h00	7.37576e-05	0.00346661	0.183079	0.183079	[4, 6]	Group8	16.6667	3	[CALM1, CALM2, CALM3]
GO:0010649	regulation of cell communication by electrical coupling	GO_BiologicalProcess-EBI-UniProt-GOA_17.02.2020_00h00	0.000203098	0.0085301	0.183079	0.183079	[5]	Group8	12	3	[CALM1, CALM2, CALM3]
GO:0014075	response to amine	GO_BiologicalProcess-EBI-UniProt-GOA_17.02.2020_00h00	0.000231293	0.0092517	0.183079	0.183079	[5]	Group8	6.15385	4	[CALM1, CALM2, CALM3, HPRT1]
GO:0016248	channel inhibitor activity	GO_BiologicalProcess-EBI-UniProt-GOA_17.02.2020_00h00	0.00188473	0.0245015	0.183079	0.183079	[5]	Group8	5.66038	3	[CALM1, CALM2, CALM3]
GO:0030235	nitric-oxide synthase regulator activity	GO_BiologicalProcess-EBI-UniProt-GOA_17.02.2020_00h00	2.02881e-05	0.00107527	0.183079	0.183079	[5]	Group8	25	3	[CALM1, CALM2, CALM3]
GO:0043647	inositol phosphate metabolic process	GO_BiologicalProcess-EBI-UniProt-GOA_17.02.2020_00h00	0.00450588	0.0135176	0.183079	0.183079	[4, 5, 6]	Group8	4.16667	3	[CALM1, CALM2, CALM3]
GO:0044042	glucan metabolic process	GO_BiologicalProcess-EBI-UniProt-GOA_17.02.2020_00h00	0.00337734	0.0236414	0.183079	0.183079	[5]	Group8	4.61538	3	[CALM1, CALM2, CALM3]
GO:0051342	regulation of cyclic-nucleotide phosphodiesterase activity	GO_BiologicalProcess-EBI-UniProt-GOA_17.02.2020_00h00	4.15411e-05	0.00207705	0.183079	0.183079	[5]	Group8	20	3	[CALM1, CALM2, CALM3]
GO:0051353	positive regulation of oxidoreductase activity	GO_BiologicalProcess-EBI-UniProt-GOA_17.02.2020_00h00	0.000400939	0.013231	0.183079	0.183079	[5]	Group8	5.33333	4	[CALM1, CALM2, CALM3, CCS]
GO:0006073	cellular glucan metabolic process	GO_BiologicalProcess-EBI-UniProt-GOA_17.02.2020_00h00	0.00337734	0.0236414	0.183079	0.183079	[5, 6]	Group8	4.61538	3	[CALM1, CALM2, CALM3]
GO:0044247	cellular polysaccharide catabolic process	GO_BiologicalProcess-EBI-UniProt-GOA_17.02.2020_00h00	0.000228825	0.00938182	0.183079	0.183079	[5, 6]	Group8	11.5385	3	[CALM1, CALM2, CALM3]
GO:0005246	calcium channel regulator activity	GO_BiologicalProcess-EBI-UniProt-GOA_17.02.2020_00h00	0.00269004	0.0269004	0.183079	0.183079	[6]	Group8	5	3	[CALM1, CALM2, CALM3]
GO:0005977	glycogen metabolic process	GO_BiologicalProcess-EBI-UniProt-GOA_17.02.2020_00h00	0.00309084	0.0278175	0.183079	0.183079	[5, 6, 7]	Group8	4.7619	3	[CALM1, CALM2, CALM3]
GO:0008200	ion channel inhibitor activity	GO_BiologicalProcess-EBI-UniProt-GOA_17.02.2020_00h00	0.00178395	0.0249753	0.183079	0.183079	[6]	Group8	5.76923	3	[CALM1, CALM2, CALM3]
GO:0009251	glucan catabolic process	GO_BiologicalProcess-EBI-UniProt-GOA_17.02.2020_00h00	0.000203098	0.0085301	0.183079	0.183079	[6]	Group8	12	3	[CALM1, CALM2, CALM3]
GO:0010856	adenylate cyclase activator activity	GO_BiologicalProcess-EBI-UniProt-GOA_17.02.2020_00h00	2.02881e-05	0.00107527	0.183079	0.183079	[6]	Group8	25	3	[CALM1, CALM2, CALM3]
GO:0019211	phosphatase activator activity	GO_BiologicalProcess-EBI-UniProt-GOA_17.02.2020_00h00	0.00011902	0.0052369	0.183079	0.183079	[6]	Group8	14.2857	3	[CALM1, CALM2, CALM3]
GO:0022400	regulation of rhodopsin mediated signaling pathway	GO_BiologicalProcess-EBI-UniProt-GOA_17.02.2020_00h00	0.000607811	0.0158031	0.183079	0.183079	[5, 6, 7]	Group8	8.33333	3	[CALM1, CALM2, CALM3]
GO:0032770	positive regulation of monooxygenase activity	GO_BiologicalProcess-EBI-UniProt-GOA_17.02.2020_00h00	0.000957964	0.0182013	0.183079	0.183079	[6]	Group8	7.14286	3	[CALM1, CALM2, CALM3]
GO:0050999	regulation of nitric-oxide synthase activity	GO_BiologicalProcess-EBI-UniProt-GOA_17.02.2020_00h00	0.00399787	0.0159915	0.183079	0.183079	[6]	Group8	4.34783	3	[CALM1, CALM2, CALM3]
GO:0051343	positive regulation of cyclic-nucleotide phosphodiesterase activity	GO_BiologicalProcess-EBI-UniProt-GOA_17.02.2020_00h00	7.82441e-06	0.000422518	0.183079	0.183079	[6]	Group8	33.3333	3	[CALM1, CALM2, CALM3]
GO:0048168	regulation of neuronal synaptic plasticity	GO_BiologicalProcess-EBI-UniProt-GOA_17.02.2020_00h00	0.00399787	0.0159915	0.183079	0.183079	[4, 7, 8]	Group8	4.34783	3	[CALM1, CALM3, RAB8A]
GO:1901844	regulation of cell communication by electrical coupling involved in cardiac conduction	GO_BiologicalProcess-EBI-UniProt-GOA_17.02.2020_00h00	7.37576e-05	0.00346661	0.183079	0.183079	[5, 6, 8]	Group8	16.6667	3	[CALM1, CALM2, CALM3]
GO:0010523	negative regulation of calcium ion transport into cytosol	GO_BiologicalProcess-EBI-UniProt-GOA_17.02.2020_00h00	0.000256571	0.0100063	0.183079	0.183079	[4, 5, 6, 7, 8, 9]	Group8	11.1111	3	[CALM1, CALM2, CALM3]
GO:0051385	response to mineralocorticoid	GO_BiologicalProcess-EBI-UniProt-GOA_17.02.2020_00h00	0.000892499	0.01785	0.183079	0.183079	[6, 7]	Group8	7.31707	3	[CALM1, CALM2, CALM3]
GO:0090151	establishment of protein localization to mitochondrial membrane	GO_BiologicalProcess-EBI-UniProt-GOA_17.02.2020_00h00	0.00011902	0.0052369	0.183079	0.183079	[5, 6, 7, 8]	Group8	14.2857	3	[CALM1, CALM2, CALM3]
GO:1903421	regulation of synaptic vesicle recycling	GO_BiologicalProcess-EBI-UniProt-GOA_17.02.2020_00h00	0.000659245	0.0158219	0.183079	0.183079	[6, 7]	Group8	8.10811	3	[CALM1, CALM2, CALM3]
GO:0051412	response to corticosterone	GO_BiologicalProcess-EBI-UniProt-GOA_17.02.2020_00h00	0.000228825	0.00938182	0.183079	0.183079	[5, 7, 8]	Group8	11.5385	3	[CALM1, CALM2, CALM3]
GO:0021762	substantia nigra development	GO_BiologicalProcess-EBI-UniProt-GOA_17.02.2020_00h00	0.00367959	0.0220776	0.183079	0.183079	[4, 6, 7, 8, 9]	Group8	4.47761	3	[CALM1, CALM2, CALM3]
GO:0005980	glycogen catabolic process	GO_BiologicalProcess-EBI-UniProt-GOA_17.02.2020_00h00	0.000157431	0.00676955	0.183079	0.183079	[6, 7, 8]	Group8	13.0435	3	[CALM1, CALM2, CALM3]
GO:0010880	regulation of release of sequestered calcium ion into cytosol by sarcoplasmic reticulum	GO_BiologicalProcess-EBI-UniProt-GOA_17.02.2020_00h00	0.000829948	0.0174289	0.183079	0.183079	[5, 6, 7, 10]	Group8	7.5	3	[CALM1, CALM2, CALM3]
GO:0019855	calcium channel inhibitor activity	GO_BiologicalProcess-EBI-UniProt-GOA_17.02.2020_00h00	0.000102358	0.00460612	0.183079	0.183079	[7]	Group8	15	3	[CALM1, CALM2, CALM3]
GO:0051000	positive regulation of nitric-oxide synthase activity	GO_BiologicalProcess-EBI-UniProt-GOA_17.02.2020_00h00	0.000352589	0.0123406	0.183079	0.183079	[7]	Group8	10	3	[CALM1, CALM2, CALM3]
GO:1900242	regulation of synaptic vesicle endocytosis	GO_BiologicalProcess-EBI-UniProt-GOA_17.02.2020_00h00	0.000256571	0.0100063	0.183079	0.183079	[6, 7, 8]	Group8	11.1111	3	[CALM1, CALM2, CALM3]
GO:0048169	regulation of long-term neuronal synaptic plasticity	GO_BiologicalProcess-EBI-UniProt-GOA_17.02.2020_00h00	0.000713375	0.0164076	0.183079	0.183079	[5, 8, 9]	Group8	7.89474	3	[CALM1, CALM3, RAB8A]
GO:0007223	Wnt signaling pathway, calcium modulating pathway	GO_BiologicalProcess-EBI-UniProt-GOA_17.02.2020_00h00	0.00159268	0.0254829	0.183079	0.183079	[6, 7, 8, 9]	Group8	6	3	[CALM1, CALM2, CALM3]
GO:0010882	regulation of cardiac muscle contraction by calcium ion signaling	GO_BiologicalProcess-EBI-UniProt-GOA_17.02.2020_00h00	0.000713375	0.0164076	0.183079	0.183079	[6, 7, 8, 9]	Group8	7.89474	3	[CALM1, CALM2, CALM3]
GO:0010922	positive regulation of phosphatase activity	GO_BiologicalProcess-EBI-UniProt-GOA_17.02.2020_00h00	0.00178395	0.0249753	0.183079	0.183079	[6, 9]	Group8	5.76923	3	[CALM1, CALM2, CALM3]
GO:0050849	negative regulation of calcium-mediated signaling	GO_BiologicalProcess-EBI-UniProt-GOA_17.02.2020_00h00	0.00159268	0.0254829	0.183079	0.183079	[7, 8]	Group8	6	3	[CALM1, CALM2, CALM3]
GO:0050850	positive regulation of calcium-mediated signaling	GO_BiologicalProcess-EBI-UniProt-GOA_17.02.2020_00h00	0.00337734	0.0236414	0.183079	0.183079	[7, 8]	Group8	4.61538	3	[CALM1, CALM2, CALM3]
GO:0051280	negative regulation of release of sequestered calcium ion into cytosol	GO_BiologicalProcess-EBI-UniProt-GOA_17.02.2020_00h00	8.72954e-05	0.00401559	0.183079	0.183079	[5, 6, 7, 8, 9, 10]	Group8	15.7895	3	[CALM1, CALM2, CALM3]
GO:0060314	regulation of ryanodine-sensitive calcium-release channel activity	GO_BiologicalProcess-EBI-UniProt-GOA_17.02.2020_00h00	0.00109785	0.0197612	0.183079	0.183079	[5, 6, 7, 8, 9, 10]	Group8	6.81818	3	[CALM1, CALM2, CALM3]
GO:2001258	negative regulation of cation channel activity	GO_BiologicalProcess-EBI-UniProt-GOA_17.02.2020_00h00	0.00309084	0.0278175	0.183079	0.183079	[6, 7, 8, 9]	Group8	4.7619	3	[CALM1, CALM2, CALM3]
GO:0010524	positive regulation of calcium ion transport into cytosol	GO_BiologicalProcess-EBI-UniProt-GOA_17.02.2020_00h00	0.000735034	0.0161708	0.183079	0.183079	[4, 5, 6, 7, 8, 9, 10, 12]	Group8	4.54545	4	[CALM1, CALM2, CALM3, TXNRD1]
GO:1901020	negative regulation of calcium ion transmembrane transporter activity	GO_BiologicalProcess-EBI-UniProt-GOA_17.02.2020_00h00	0.00150209	0.0255356	0.183079	0.183079	[6, 7, 8, 9, 10]	Group8	6.12245	3	[CALM1, CALM2, CALM3]
GO:1901021	positive regulation of calcium ion transmembrane transporter activity	GO_BiologicalProcess-EBI-UniProt-GOA_17.02.2020_00h00	0.00168662	0.0252993	0.183079	0.183079	[6, 7, 8, 9, 10]	Group8	5.88235	3	[CALM1, CALM2, CALM3]
GO:1903170	negative regulation of calcium ion transmembrane transport	GO_BiologicalProcess-EBI-UniProt-GOA_17.02.2020_00h00	0.00198899	0.0238679	0.183079	0.183079	[7, 8, 9]	Group8	5.55556	3	[CALM1, CALM2, CALM3]
GO:0010799	regulation of peptidyl-threonine phosphorylation	GO_BiologicalProcess-EBI-UniProt-GOA_17.02.2020_00h00	0.00383671	0.0191836	0.183079	0.183079	[8, 9]	Group8	4.41176	3	[CALM1, CALM2, CALM3]
GO:0010881	regulation of cardiac muscle contraction by regulation of the release of sequestered calcium ion	GO_BiologicalProcess-EBI-UniProt-GOA_17.02.2020_00h00	0.00042789	0.0132646	0.183079	0.183079	[6, 7, 8, 9, 10, 11]	Group8	9.375	3	[CALM1, CALM2, CALM3]
GO:0031952	regulation of protein autophosphorylation	GO_BiologicalProcess-EBI-UniProt-GOA_17.02.2020_00h00	0.00505131	0.00505131	0.183079	0.183079	[8, 9]	Group8	4	3	[CALM1, CALM2, CALM3]
GO:0035307	positive regulation of protein dephosphorylation	GO_BiologicalProcess-EBI-UniProt-GOA_17.02.2020_00h00	0.00399787	0.0159915	0.183079	0.183079	[8, 9]	Group8	4.34783	3	[CALM1, CALM2, CALM3]
GO:0060315	negative regulation of ryanodine-sensitive calcium-release channel activity	GO_BiologicalProcess-EBI-UniProt-GOA_17.02.2020_00h00	6.16702e-05	0.00296017	0.183079	0.183079	[6, 7, 8, 9, 10, 11]	Group8	17.6471	3	[CALM1, CALM2, CALM3]
GO:0051281	positive regulation of release of sequestered calcium ion into cytosol	GO_BiologicalProcess-EBI-UniProt-GOA_17.02.2020_00h00	0.000260019	0.00988073	0.183079	0.183079	[5, 6, 7, 8, 9, 10, 11, 13]	Group8	5.97015	4	[CALM1, CALM2, CALM3, TXNRD1]
GO:0032516	positive regulation of phosphoprotein phosphatase activity	GO_BiologicalProcess-EBI-UniProt-GOA_17.02.2020_00h00	0.000512804	0.0148713	0.183079	0.183079	[7, 9, 10]	Group8	8.82353	3	[CALM1, CALM2, CALM3]
GO:1901385	regulation of voltage-gated calcium channel activity	GO_BiologicalProcess-EBI-UniProt-GOA_17.02.2020_00h00	0.00159268	0.0254829	0.183079	0.183079	[7, 9, 10]	Group8	6	3	[CALM1, CALM2, CALM3]
GO:0072542	protein phosphatase activator activity	GO_BiologicalProcess-EBI-UniProt-GOA_17.02.2020_00h00	7.37576e-05	0.00346661	0.183079	0.183079	[7, 8, 10, 11]	Group8	16.6667	3	[CALM1, CALM2, CALM3]
GO:0061001	regulation of dendritic spine morphogenesis	GO_BiologicalProcess-EBI-UniProt-GOA_17.02.2020_00h00	0.00505131	0.00505131	0.183079	0.183079	[6, 7, 8, 10, 11, 12, 13]	Group8	4	3	[CALM1, CALM3, NRBP1]
GO:0060316	positive regulation of ryanodine-sensitive calcium-release channel activity	GO_BiologicalProcess-EBI-UniProt-GOA_17.02.2020_00h00	2.62865e-05	0.00134061	0.183079	0.183079	[6, 7, 8, 9, 10, 11, 12, 14]	Group8	23.0769	3	[CALM1, CALM2, CALM3]
GO:1901841	regulation of high voltage-gated calcium channel activity	GO_BiologicalProcess-EBI-UniProt-GOA_17.02.2020_00h00	8.72954e-05	0.00401559	0.183079	0.183079	[8, 10, 11]	Group8	15.7895	3	[CALM1, CALM2, CALM3]
