# Supplementary material for: Ellagic Acid Triggers the Necrosis of Differentiated Human Enterocytes Exposed to 3-Nitro-Tyrosine: An MS-Based Proteomic Study
Source: Antioxidants (Basel). 2022 Dec 17;11(12):2485. doi: 10.3390/antiox11122485 (PMC9774974; doi:10.3390/antiox11122485)
Supplement: Supplementary file 1 [file antioxidants-11-02485-s001.zip › Table S6.xls]

## Sheet: ClueGO Results
ID	Term	Ontology Source	Term PValue	Term PValue Corrected with Bonferroni step down	Group PValue	Group PValue Corrected with Bonferroni step down	GOLevels	GOGroups	% Associated Genes	Nr. Genes	Associated Genes Found
GO:0048027	mRNA 5'-UTR binding	GO_MolecularFunction-EBI-UniProt-GOA_17.02.2020_00h00	0.000760231	0.00608185	0.000760231	0.00228069	[6]	Group0	7.69231	3	[NCL, RPS14, RSL1D1]
GO:0055106	ubiquitin-protein transferase regulator activity	GO_MolecularFunction-EBI-UniProt-GOA_17.02.2020_00h00	0.000383955	0.00345559	0.000383955	0.00153582	[3]	Group1	9.67742	3	[AUP1, CDH1, RPL11]
GO:0017022	myosin binding	GO_MolecularFunction-EBI-UniProt-GOA_17.02.2020_00h00	0.000853874	0.00597712	0.000853874	0.00170775	[4]	Group2	4.34783	4	[MYL12B, MYL9, RAB6A, RAB8A]
GO:0016248	channel inhibitor activity	GO_MolecularFunction-EBI-UniProt-GOA_17.02.2020_00h00	0.00186061	0.00372122	0.0388185	0.0388185	[3]	Group3	5.66038	3	[CALM1, CALM2, CALM3]
GO:0030235	nitric-oxide synthase regulator activity	GO_MolecularFunction-EBI-UniProt-GOA_17.02.2020_00h00	2.00153e-05	0.000320244	0.0388185	0.0388185	[3]	Group3	25	3	[CALM1, CALM2, CALM3]
GO:0043548	phosphatidylinositol 3-kinase binding	GO_MolecularFunction-EBI-UniProt-GOA_17.02.2020_00h00	0.00123386	0.00616932	0.0388185	0.0388185	[3]	Group3	6.52174	3	[CALM1, CALM2, CALM3]
GO:0048306	calcium-dependent protein binding	GO_MolecularFunction-EBI-UniProt-GOA_17.02.2020_00h00	0.000889155	0.00533493	0.0388185	0.0388185	[3]	Group3	4.30108	4	[CALM1, CALM2, CALM3, TSG101]
GO:0005246	calcium channel regulator activity	GO_MolecularFunction-EBI-UniProt-GOA_17.02.2020_00h00	0.0026559	0.0026559	0.0388185	0.0388185	[4]	Group3	5	3	[CALM1, CALM2, CALM3]
GO:0008179	adenylate cyclase binding	GO_MolecularFunction-EBI-UniProt-GOA_17.02.2020_00h00	0.000282626	0.00282626	0.0388185	0.0388185	[4]	Group3	10.7143	3	[CALM1, CALM2, CALM3]
GO:0008200	ion channel inhibitor activity	GO_MolecularFunction-EBI-UniProt-GOA_17.02.2020_00h00	0.00176109	0.00528328	0.0388185	0.0388185	[4]	Group3	5.76923	3	[CALM1, CALM2, CALM3]
GO:0010856	adenylate cyclase activator activity	GO_MolecularFunction-EBI-UniProt-GOA_17.02.2020_00h00	2.00153e-05	0.000320244	0.0388185	0.0388185	[4]	Group3	25	3	[CALM1, CALM2, CALM3]
GO:0019211	phosphatase activator activity	GO_MolecularFunction-EBI-UniProt-GOA_17.02.2020_00h00	0.000117437	0.00152668	0.0388185	0.0388185	[4]	Group3	14.2857	3	[CALM1, CALM2, CALM3]
GO:0031432	titin binding	GO_MolecularFunction-EBI-UniProt-GOA_17.02.2020_00h00	0.000100995	0.00141393	0.0388185	0.0388185	[4]	Group3	15	3	[CALM1, CALM2, CALM3]
GO:0031997	N-terminal myristoylation domain binding	GO_MolecularFunction-EBI-UniProt-GOA_17.02.2020_00h00	3.23765e-06	5.50401e-05	0.0388185	0.0388185	[4]	Group3	42.8571	3	[CALM1, CALM2, CALM3]
GO:0035254	glutamate receptor binding	GO_MolecularFunction-EBI-UniProt-GOA_17.02.2020_00h00	0.00017765	0.00195415	0.0388185	0.0388185	[4]	Group3	6.55738	4	[CALM1, CALM2, CALM3, MYL12A]
GO:0050998	nitric-oxide synthase binding	GO_MolecularFunction-EBI-UniProt-GOA_17.02.2020_00h00	0.000135529	0.00162635	0.0388185	0.0388185	[4]	Group3	13.6364	3	[CALM1, CALM2, CALM3]
GO:0097718	disordered domain specific binding	GO_MolecularFunction-EBI-UniProt-GOA_17.02.2020_00h00	0.00186061	0.00372122	0.0388185	0.0388185	[4]	Group3	5.66038	3	[CALM1, CALM2, CALM3]
GO:0019855	calcium channel inhibitor activity	GO_MolecularFunction-EBI-UniProt-GOA_17.02.2020_00h00	0.000100995	0.00141393	0.0388185	0.0388185	[5]	Group3	15	3	[CALM1, CALM2, CALM3]
GO:0035256	G protein-coupled glutamate receptor binding	GO_MolecularFunction-EBI-UniProt-GOA_17.02.2020_00h00	7.27729e-05	0.00109159	0.0388185	0.0388185	[5]	Group3	16.6667	3	[CALM1, CALM2, CALM3]
GO:0072542	protein phosphatase activator activity	GO_MolecularFunction-EBI-UniProt-GOA_17.02.2020_00h00	7.27729e-05	0.00109159	0.0388185	0.0388185	[5]	Group3	16.6667	3	[CALM1, CALM2, CALM3]
GO:0031800	type 3 metabotropic glutamate receptor binding	GO_MolecularFunction-EBI-UniProt-GOA_17.02.2020_00h00	9.37444e-08	1.6874e-06	0.0388185	0.0388185	[6]	Group3	100	3	[CALM1, CALM2, CALM3]
GO:0043539	protein serine/threonine kinase activator activity	GO_MolecularFunction-EBI-UniProt-GOA_17.02.2020_00h00	0.00157222	0.00628889	0.0388185	0.0388185	[6]	Group3	6	3	[CALM1, CALM2, CALM3]
