# Supplementary material for: Ellagic Acid Triggers the Necrosis of Differentiated Human Enterocytes Exposed to 3-Nitro-Tyrosine: An MS-Based Proteomic Study
Source: Antioxidants (Basel). 2022 Dec 17;11(12):2485. doi: 10.3390/antiox11122485 (PMC9774974; doi:10.3390/antiox11122485)
Supplement: Supplementary file 1 [file antioxidants-11-02485-s001.zip › Table S7.xls]

## Sheet: ClueGO Results
ID	Term	Ontology Source	Term PValue	Term PValue Corrected with Bonferroni step down	Group PValue	Group PValue Corrected with Bonferroni step down	GOLevels	GOGroups	% Associated Genes	Nr. Genes	Associated Genes Found
GO:0006091	generation of precursor metabolites and energy	GO_BiologicalProcess-EBI-UniProt-GOA_17.02.2020_00h00	1.37272e-07	0.000249698	1.37272e-07	2.60817e-06	[3]	Group00	10	51	[ACAT1, ALDOC, ASPH, ATP5F1A, ATP5F1B, ATP5F1C, ATP5F1D, ATP5PB, ATP5PD, ATP5PO, BDH1, CALM1, CALM2, CALM3, COX5B, CRYL1, DEGS1, DLAT, ENO1, ETFA, FDXR, GALK1, GFER, GFPT1, GNAS, HMGCS2, IDH3A, IDH3B, LDHA, MECP2, MSH2, NDUFA6, NDUFA8, NDUFA9, NDUFAF2, NNT, OXA1L, PDHX, PGM1, PHGDH, PICALM, PKM, SDHAF2, SIRT3, SLC25A13, SLC25A22, SLC25A4, STOML2, SUCLG1, SURF1, VDAC2]
GO:0033554	cellular response to stress	GO_BiologicalProcess-EBI-UniProt-GOA_17.02.2020_00h00	8.29002e-10	1.55769e-06	8.29002e-10	2.15541e-08	[3]	Group01	7.32499	158	[ABHD14B, ADD1, AGFG1, AK4, ARFGAP3, ARID3A, ASS1, BAX, BCLAF1, BRCC3, BSG, CACYBP, CANX, CCS, CDC37, CDK5RAP3, CETN2, CLPB, COMT, COPS7A, COPS7B, COPS8, CSRP1, CTNNA1, CUL4B, DCTN1, DCTPP1, DDRGK1, DHRS4, DIABLO, DNAJB1, DNM2, DPEP1, EEF2, EFHD2, EGFR, EIF2AK2, EIF4A2, EIF4E, EIF4G2, ERLIN1, ERLIN2, ETF1, FAF2, FAM162A, FEN1, FLOT1, FMR1, FOLR1, GET3, GFER, GFPT1, GNB1, GORASP2, HDGF, HMGA1, HNR…
GO:0034599	cellular response to oxidative stress	GO_BiologicalProcess-EBI-UniProt-GOA_17.02.2020_00h00	1.76913e-05	0.0300221	1.76913e-05	7.07651e-05	[4, 5]	Group02	10.2167	33	[AGFG1, BSG, CACYBP, CCS, DHRS4, DIABLO, DNM2, DPEP1, EGFR, KALRN, LONP1, MAPK1, MAPK3, MTTP, PDCD10, PPP5C, PRKAA1, PRKCD, PRKRA, PRODH, PTMA, PXN, PYCR1, RBM14, RPS3, SIRT2, SLC25A24, SOD2, SPAG9, SRC, STX4, SYMPK, TPM1]
GO:0016197	endosomal transport	GO_BiologicalProcess-EBI-UniProt-GOA_17.02.2020_00h00	7.73485e-08	0.000141316	7.73485e-08	1.62432e-06	[4, 5]	Group03	12.4113	35	[AP3B1, ARF6, CALM2, CALM3, CHMP1A, CHMP2A, CHMP4A, CHMP4B, CHMP5, DCTN1, DPY30, EHD1, EHD4, GFER, HGS, PICALM, PTPN23, RAB10, RAB1C, RAB6C, RAB8A, RAB9A, SNX2, SNX4, SNX5, SNX8, SNX9, SPAG9, SQSTM1, SRSF5, STX5, TOM1, TSG101, UBE2O, WASF2]
GO:0044283	small molecule biosynthetic process	GO_BiologicalProcess-EBI-UniProt-GOA_17.02.2020_00h00	1.54538e-07	0.000280795	1.54538e-07	2.62714e-06	[3]	Group04	8.89774	67	[AASS, ACAT1, ACAT2, ACSL3, ALDH18A1, ALDOC, APRT, ASS1, BDH1, CNPY2, COQ8A, CPS1, DCTPP1, DEGS1, DHCR7, DNPH1, DTYMK, ENO1, FDPS, FDXR, FOLR1, GAMT, GFER, GLS, GMPS, GOT1, HMGCS2, HPRT1, HSD17B12, HSD17B4, HSD17B7, HSD17B8, IMPA1, ITPA, KHSRP, LSS, MAVS, MGST3, MMAB, MSMO1, MTHFD1, NDUFA9, NT5E, NUDT4, PAPSS2, PC, PCK2, PGM1, PHGDH, PKM, PLCB3, PLCD3, PLOD3, PNKP, PRKAA1, PRKAG1, PSPH, PYCR1, SC…
GO:0003857	3-hydroxyacyl-CoA dehydrogenase activity	GO_BiologicalProcess-EBI-UniProt-GOA_17.02.2020_00h00	2.11343e-05	0.0356958	2.11343e-05	4.22685e-05	[6]	Group05	55.5556	5	[CRYL1, HADHA, HADHB, HSD17B4, HSD17B8]
GO:0006629	lipid metabolic process	GO_BiologicalProcess-EBI-UniProt-GOA_17.02.2020_00h00	1.2568e-05	0.0214158	1.2568e-05	8.79758e-05	[3]	Group06	6.98455	104	[ACAA1, ACAD10, ACAT1, ACAT2, ACBD3, ACBD5, ACP6, ACSL3, ACSL5, AGPAT1, AGPS, ALDOC, ALPP, ATP5F1A, ATP5F1B, ATP6V1B2, BAX, BPNT1, CCT2, COMT, CPS1, CRYL1, CXADR, CYP2S1, DDX27, DEGS1, DHCR7, DHRS4, DHRS7B, DOLPP1, DPM1, ECHDC1, ECI2, EGFR, ERLIN1, ERLIN2, ESYT1, ETFA, FDPS, FDXR, GCDH, GK, GK3P, GNPAT, HADHA, HADHB, HDHD5, HINT2, HMGCS2, HSD17B12, HSD17B4, HSD17B7, HSD17B8, IMPA1, INPPL1, LDAH, …
GO:0002159	desmosome assembly	GO_BiologicalProcess-EBI-UniProt-GOA_17.02.2020_00h00	1.12947e-06	0.00200594	1.12947e-06	1.46831e-05	[6]	Group07	83.3333	5	[JUP, PKP2, PKP3, PRKACA, PRKCA]
GO:0009410	response to xenobiotic stimulus	GO_BiologicalProcess-EBI-UniProt-GOA_17.02.2020_00h00	1.05069e-05	0.0179669	1.05069e-05	8.40555e-05	[3]	Group08	9.79381	38	[ACAA1, AIP, ASS1, CALM1, CALM2, CALM3, CCT6A, CDK5, CLDN1, CPS1, CYB5B, CYP2S1, DNM2, DPEP1, DPYSL2, EGFR, EIF4A2, EIF4E, EIF4G2, GSTO1, HPRT1, HSP90AB1, HSPD1, MGST3, MTARC2, NCEH1, PCK2, PHGDH, PPP5C, PRKAA1, PRKACB, SLC25A4, SLC25A5, SULT1A3, SULT1A4, TIGAR, TRIP10, VDAC2]
GO:0010564	regulation of cell cycle process	GO_BiologicalProcess-EBI-UniProt-GOA_17.02.2020_00h00	2.56177e-05	0.0429609	2.56177e-05	2.56177e-05	[5]	Group09	7.38636	78	[AGFG1, AIP, APPL1, APPL2, ARID3A, ATP2B4, ATP6V1H, BAX, BIN1, BRCC3, CACYBP, CALM1, CALM2, CALM3, CAMK2B, CDK5, CDK5RAP3, CENPV, CETN2, CHMP1A, CHMP2A, CHMP4A, CHMP4B, CHMP5, CHORDC1, CHTOP, COASY, CTNNB1, CUL4B, DCTN1, DCTN2, DDRGK1, EGFR, EIF4A2, EIF4E, ETF1, FEN1, HNRNPU, HSP90AA1, HSP90AB1, IK, MAPRE1, MECP2, NDRG1, NPM1, NUP62, PDCD6IP, PHB2, PICALM, PPP2R1A, PRKACA, PRKCA, PSMC6, PSMD8, PS…
GO:0004176	ATP-dependent peptidase activity	GO_BiologicalProcess-EBI-UniProt-GOA_17.02.2020_00h00	2.07523e-05	0.0350714	2.07523e-05	6.22569e-05	[7, 8]	Group10	80	4	[CLPP, CLPX, LONP1, YME1L1]
GO:0006066	alcohol metabolic process	GO_BiologicalProcess-EBI-UniProt-GOA_17.02.2020_00h00	1.72977e-06	0.00305305	1.72977e-06	2.07573e-05	[3, 4]	Group11	9.9537	43	[ACAT1, ACAT2, ALDOC, CALM1, CALM2, CALM3, DHCR7, DHRS4, DPM1, ERLIN1, ERLIN2, FDPS, FDXR, GALK1, GFER, GK, GK3P, GOT1, HMGCS2, HSD17B7, IDH3A, IDH3B, IMPA1, INPPL1, LIMA1, LSS, MAVS, MECP2, MSMO1, NUDT4, PAPSS2, PCK2, PICALM, PLCB3, PLCD3, PRKAA1, RDH11, SC5D, SULT1A3, SULT1A4, SULT2A1, SYMPK, TRIP10]
GO:0080134	regulation of response to stress	GO_BiologicalProcess-EBI-UniProt-GOA_17.02.2020_00h00	9.88653e-08	0.000180231	9.88653e-08	1.97731e-06	[4]	Group12	7.06357	140	[ACTG1, AGFG1, AGR2, APPL1, APPL2, ATP2B4, BAX, BCAP31, BCLAF1, BRCC3, BSG, CACYBP, CALM1, CALM3, CAMK2B, CAMK2G, CD9, CDC37, CDK11B, CEACAM1, CHCHD2, CHORDC1, CLDN1, CTNNB1, DDX39B, DDX5, DEK, DNAJB1, EEF1E1, EEF1E1-BLOC1S5, EGFR, EIF2AK2, EIF4A2, EIF4E, ENO1, EZR, F11R, FLOT1, FMR1, FUS, FXR2, GFER, HMGA1, HSP90AA1, HSP90AB1, HSP90B1, HSPD1, IGF2BP1, ITGA2, KDM1A, LETM1, LMNA, MAP2K2, MAPK1, MA…
GO:0080135	regulation of cellular response to stress	GO_BiologicalProcess-EBI-UniProt-GOA_17.02.2020_00h00	1.23956e-09	2.32417e-06	9.88653e-08	1.97731e-06	[4, 5]	Group12	8.87338	89	[AGFG1, AGR2, BAX, BCAP31, BCLAF1, BRCC3, BSG, CALM1, CALM3, CAMK2B, CAMK2G, CHCHD2, CHORDC1, CTNNB1, DDX39B, DDX5, DEK, DNAJB1, EEF1E1, EEF1E1-BLOC1S5, EGFR, EIF2AK2, EIF4A2, EIF4E, ENO1, EZR, FMR1, FUS, FXR2, GFER, HMGA1, HSP90AA1, HSP90AB1, KDM1A, LETM1, MAP2K2, MAPK1, MAPK3, MMAB, MTTP, NAMPT, NONO, NPM1, NUP107, NUP155, NUP160, NUP50, NUP58, NUP62, NUP85, NUP88, NUP98, OPA1, OTUB1, PAG1, PAK…
GO:1903320	regulation of protein modification by small protein conjugation or removal	GO_BiologicalProcess-EBI-UniProt-GOA_17.02.2020_00h00	8.40885e-06	0.0144464	8.40885e-06	7.56796e-05	[7, 8]	Group13	10.4762	33	[AIMP2, ALPP, ARRB1, CDK5, CDK5RAP3, CHORDC1, CTNNB1, GNL3, HSP90AA1, HSP90AB1, KDM1A, MTTP, MYO1A, MYO1C, NXN, OTUB1, PDCD6, PSEN1, RPL11, RPL17, RPL5, RPS2, RPS3, RPS4X, RPS7, SAE1, SQSTM1, SYMPK, TOLLIP, UBA2, UBQLN1, UBXN1, UFL1]
GO:1903321	negative regulation of protein modification by small protein conjugation or removal	GO_BiologicalProcess-EBI-UniProt-GOA_17.02.2020_00h00	2.25129e-05	0.0379117	8.40885e-06	7.56796e-05	[8, 9]	Group13	14.5299	17	[ALPP, ARRB1, CDK5, CHORDC1, CTNNB1, MTTP, NXN, OTUB1, PSEN1, RPL11, RPL17, RPL5, RPS3, RPS7, SQSTM1, UBXN1, UFL1]
GO:0031647	regulation of protein stability	GO_BiologicalProcess-EBI-UniProt-GOA_17.02.2020_00h00	1.30478e-05	0.0222205	4.91813e-06	4.91813e-05	[3]	Group14	9.86667	37	[ASPH, ATP1B1, ATP1B3, CCT2, CCT3, CCT4, CCT5, CCT6A, CDC37, CHORDC1, CTNND1, EFHD2, EIF4E, FLOT1, HSP90AA1, HSP90AB1, HSP90AB2P, HSPD1, LMNA, LONP1, LSS, MAPK1, NAPG, PAG1, PDCD10, PHB, PHB2, PRKCD, PRKRA, RPL11, RPL17, RPL5, RPS7, SRC, SUGT1, TCOF1, TCP1]
GO:0050821	protein stabilization	GO_BiologicalProcess-EBI-UniProt-GOA_17.02.2020_00h00	2.85954e-06	0.00501849	4.91813e-06	4.91813e-05	[4]	Group14	11.7886	29	[ATP1B1, ATP1B3, CCT2, CCT3, CCT4, CCT5, CCT6A, CDC37, CHORDC1, CTNND1, EFHD2, FLOT1, HSP90AA1, HSP90AB1, HSP90AB2P, HSPD1, LONP1, NAPG, PDCD10, PHB, PHB2, PRKCD, PRKRA, RPL11, RPL17, RPL5, RPS7, SUGT1, TCP1]
GO:1900180	regulation of protein localization to nucleus	GO_BiologicalProcess-EBI-UniProt-GOA_17.02.2020_00h00	3.37568e-06	0.00589394	4.91813e-06	4.91813e-05	[6]	Group14	13.8365	22	[CCT2, CCT3, CCT4, CCT5, CCT6A, CD2AP, CDK5RAP3, CHORDC1, HSP90AB1, JUP, LMNA, MAPK1, MAVS, NUP58, NUP62, PRKCD, PSEN1, RAN, SRC, TCOF1, TCP1, TRIM28]
GO:0032989	cellular component morphogenesis	GO_BiologicalProcess-EBI-UniProt-GOA_17.02.2020_00h00	4.7116e-08	8.64107e-05	4.7116e-08	1.03655e-06	[3, 4]	Group15	8.23312	89	[ABHD14B, ABI1, ACTB, ACTC1, ACTG1, ADD1, AFG3L2, AGFG1, ANK3, BAIAP2, BAX, BSG, CALM2, CALM3, CAPZB, CCDC6, CD9, CDH17, CDK5, CFL2, CSNK1A1, CSRP1, CTNNB1, CTTN, DNM2, DPYSL2, EGFR, EPB41L5, EZR, FLOT1, GAMT, GNPAT, HPRT1, HSP90AA1, HSP90AB1, ILK, IMMT, ITGAV, KIF5B, LLGL2, LMNB2, LYPLA2, MAPK1, MAPK3, MARCKSL1, MMAB, MTTP, NIBAN2, NPTN, OPA1, PACSIN2, PAK1, PARD6B, PDCD6IP, PICALM, PITPNA, PLOD…
GO:0000902	cell morphogenesis	GO_BiologicalProcess-EBI-UniProt-GOA_17.02.2020_00h00	2.62404e-05	0.043979	4.7116e-08	1.03655e-06	[4, 5]	Group15	7.56124	71	[ABHD14B, ABI1, ACTB, ADD1, AFG3L2, ANK3, BAIAP2, BSG, CALM2, CALM3, CAPZB, CCDC6, CDH17, CDK5, CSNK1A1, CTNNB1, CTTN, DNM2, DPYSL2, EGFR, EPB41L5, EZR, FLOT1, GAMT, HPRT1, HSP90AA1, HSP90AB1, ILK, ITGAV, KIF5B, LLGL2, LMNB2, LYPLA2, MAPK1, MAPK3, MMAB, MTTP, NIBAN2, NPTN, PACSIN2, PAK1, PARD6B, PDCD6IP, PICALM, PITPNA, PLOD3, PLXNA2, PRKACA, PRKCA, PXN, RAB10, RAB25, RAB8A, RAC1, RHOG, S100A6, S…
GO:0032990	cell part morphogenesis	GO_BiologicalProcess-EBI-UniProt-GOA_17.02.2020_00h00	3.73708e-06	0.00651373	4.7116e-08	1.03655e-06	[4, 5]	Group15	8.56314	59	[ABI1, ACTB, AFG3L2, ANK3, BAIAP2, BAX, BSG, CALM2, CALM3, CCDC6, CDK5, CTNNB1, CTTN, DNM2, DPYSL2, EGFR, EZR, FLOT1, HPRT1, HSP90AA1, HSP90AB1, ILK, IMMT, KIF5B, LMNB2, LYPLA2, MAPK1, MAPK3, MTTP, NIBAN2, NPTN, OPA1, PACSIN2, PAK1, PARD6B, PDCD6IP, PICALM, PITPNA, PLXNA2, POLDIP2, PRKACA, PRKCA, RAB10, RAB8A, RAC1, RHOG, S100A6, SHTN1, SNX2, SRC, SSBP1, STMN1, SUPV3L1, TMEM245, TPM3, UBA2, USP39…
GO:0034976	response to endoplasmic reticulum stress	GO_BiologicalProcess-EBI-UniProt-GOA_17.02.2020_00h00	8.26015e-07	0.00147361	1.52703e-07	2.74865e-06	[4]	Group16	11.0119	37	[ADD1, ARFGAP3, BAX, CANX, CDK5RAP3, DCTN1, DDRGK1, EEF2, EIF2AK2, EIF4A2, EIF4E, ERLIN1, ERLIN2, FAF2, FLOT1, GET3, GFPT1, GORASP2, HDGF, HSP90B1, IGF2BP1, LMNA, NPLOC4, PDCD6IP, PDIA5, PDIA6, PSMC6, SRPRA, SRPRB, SUGT1, SULT1A3, SULT1A4, TRAP1, TRIM25, UBQLN1, UFL1, VAPB]
GO:0006986	response to unfolded protein	GO_BiologicalProcess-EBI-UniProt-GOA_17.02.2020_00h00	7.47011e-06	0.012871	1.52703e-07	2.74865e-06	[4, 5]	Group16	11.9266	26	[ADD1, ARFGAP3, BAX, CANX, CDK5RAP3, DCTN1, DNAJB1, EIF2AK2, FAF2, GET3, GFPT1, HDGF, HSP90AA1, HSP90AB1, HSP90B1, HSPD1, LMNA, PDCD6IP, PDIA5, PDIA6, SERPINH1, SRPRA, SRPRB, SULT1A3, SULT1A4, VAPB]
GO:0036498	IRE1-mediated unfolded protein response	GO_BiologicalProcess-EBI-UniProt-GOA_17.02.2020_00h00	7.49495e-06	0.0129063	1.52703e-07	2.74865e-06	[4, 5, 6, 7, 8]	Group16	18.4211	14	[ADD1, ARFGAP3, DCTN1, GET3, GFPT1, HDGF, LMNA, PDIA5, PDIA6, SRPRA, SRPRB, SULT1A3, SULT1A4, VAPB]
GO:0051098	regulation of binding	GO_BiologicalProcess-EBI-UniProt-GOA_17.02.2020_00h00	1.0307e-06	0.00183362	1.0307e-06	1.44298e-05	[3]	Group17	9.81211	47	[ACTB, ADD1, ADNP, ARRB1, BAX, CALM1, CALM2, CALM3, CDK5, CSNK1A1, CTNNB1, DDRGK1, EIF3E, EIF4A2, EIF4E, EPB41L5, FLOT1, FMR1, GTF2F1, HSP90AB1, IGF2BP2, ITGA2, KDM1A, MAPK3, MAPRE1, MTTP, NIBAN2, PDHX, PEX14, PRKACA, PRKCA, PRKCD, PSEN1, RALB, RAN, RPL11, RUVBL2, SIRT2, SNAPIN, SRC, STMN1, SYMPK, TCOF1, TRIM28, VAC14, VTN, ZMPSTE24]
GO:0043393	regulation of protein binding	GO_BiologicalProcess-EBI-UniProt-GOA_17.02.2020_00h00	1.17217e-05	0.020009	1.0307e-06	1.44298e-05	[4]	Group17	10.9091	30	[ACTB, ADD1, ADNP, ARRB1, BAX, CDK5, EPB41L5, FLOT1, GTF2F1, HSP90AB1, IGF2BP2, KDM1A, MAPK3, MAPRE1, MTTP, PEX14, PRKACA, PRKCA, PRKCD, PSEN1, RALB, RAN, RPL11, RUVBL2, SNAPIN, SRC, STMN1, SYMPK, TCOF1, VTN]
GO:0051099	positive regulation of binding	GO_BiologicalProcess-EBI-UniProt-GOA_17.02.2020_00h00	8.50315e-08	0.000155183	1.0307e-06	1.44298e-05	[4]	Group17	13.0612	32	[ADD1, ARRB1, CALM1, CALM2, CALM3, CDK5, CTNNB1, DDRGK1, EIF3E, EIF4A2, EIF4E, EPB41L5, FLOT1, FMR1, HSP90AB1, IGF2BP2, ITGA2, KDM1A, MAPRE1, MTTP, NIBAN2, PDHX, PSEN1, RALB, RAN, RPL11, SIRT2, STMN1, TCOF1, TRIM28, VAC14, VTN]
GO:0098631	cell adhesion mediator activity	GO_BiologicalProcess-EBI-UniProt-GOA_17.02.2020_00h00	3.32671e-06	0.00581509	3.32671e-06	3.65938e-05	[3]	Group18	18.5185	15	[BAIAP2, BSG, CXADR, DSG2, EPCAM, ITGA2, JUP, KRT18, NPTN, PDLIM5, PKP2, PKP3, RAB10, RPL9, TMOD3]
GO:0098632	cell-cell adhesion mediator activity	GO_BiologicalProcess-EBI-UniProt-GOA_17.02.2020_00h00	3.24438e-06	0.00567767	3.32671e-06	3.65938e-05	[4]	Group18	19.7183	14	[BAIAP2, BSG, CXADR, DSG2, EPCAM, JUP, KRT18, NPTN, PDLIM5, PKP2, PKP3, RAB10, RPL9, TMOD3]
GO:0098641	cadherin binding involved in cell-cell adhesion	GO_BiologicalProcess-EBI-UniProt-GOA_17.02.2020_00h00	6.96491e-06	0.0120284	3.32671e-06	3.65938e-05	[5]	Group18	33.3333	8	[BAIAP2, EPCAM, KRT18, PDLIM5, PKP3, RAB10, RPL9, TMOD3]
GO:0006996	organelle organization	GO_BiologicalProcess-EBI-UniProt-GOA_17.02.2020_00h00	6.84435e-23	1.34765e-19	3.88228e-31	1.78585e-29	[3]	Group19	7.57651	307	[ABHD14B, ABI1, ABRAXAS2, ACAA1, ACIN1, ACTB, ACTC1, ACTG1, ACTL8, ACTN4, ADD1, AFG3L2, AGFG1, AGPS, AIP, AKAP8L, ALPP, ANK3, AP3B1, ARF6, ARFGAP3, ARFIP2, ARRB1, ATAD3A, ATL2, ATP5F1A, ATP5F1B, ATP5F1C, ATP5F1D, ATP5PB, ATP5PD, ATP5PO, ATP6V1A, ATP6V1B2, ATP6V1D, ATP6V1E1, ATP6V1G1, ATP6V1H, BAIAP2, BAX, BIN1, BRCC3, CACYBP, CALM1, CALM2, CALM3, CAMK2B, CAPG, CAPZB, CCDC115, CCDC6, CD2AP, CDK5, …
GO:0022607	cellular component assembly	GO_BiologicalProcess-EBI-UniProt-GOA_17.02.2020_00h00	1.63033e-26	3.23295e-23	3.88228e-31	1.78585e-29	[3]	Group19	8.73684	249	[ABRAXAS2, ACAT1, ACAT2, ACSL3, ACTB, ACTC1, ACTG1, ACTN4, ADD1, ADRM1, AFDN, AFG3L2, AGFG1, AIMP2, ANK3, AP3B1, APPL2, ARF6, ARFIP2, ARRB1, ATL2, ATP5F1D, ATP6V1D, ATP6V1H, BAIAP2, BIN1, BOLA2, BOLA2B, CACYBP, CALM2, CALM3, CAND1, CAPG, CAPZB, CCDC115, CCT2, CCT3, CD2AP, CD2BP2, CD9, CDH17, CDK5, CELF1, CENPV, CETN2, CFL2, CHMP1A, CHMP2A, CHMP4A, CHMP4B, CHMP5, CHORDC1, CHTOP, CLDN1, COASY, COPS…
GO:0007010	cytoskeleton organization	GO_BiologicalProcess-EBI-UniProt-GOA_17.02.2020_00h00	1.57642e-11	3.02201e-08	3.88228e-31	1.78585e-29	[4]	Group19	8.57558	118	[ABHD14B, ABI1, ABRAXAS2, ACTB, ACTC1, ACTG1, ACTL8, ACTN4, ADD1, AGFG1, ALPP, ANK3, ARF6, ARFIP2, ARRB1, BAIAP2, BIN1, CACYBP, CALM1, CALM2, CALM3, CAMK2B, CAPZB, CCDC6, CD2AP, CDK5, CETN2, CFL2, CHORDC1, CHTOP, CORO7, CORO7-PAM16, CSNK1A1, CSRP1, CTNNB1, CTNND1, CTTN, CXADR, DCTN1, DCTN2, DPYSL2, EPB41L1, EPB41L2, EPB41L5, EPS8, EZR, F11R, FDPS, GAN, HSP90AA1, HSP90B1, INPPL1, IQGAP2, JUP, KPNB…
GO:0034330	cell junction organization	GO_BiologicalProcess-EBI-UniProt-GOA_17.02.2020_00h00	5.56128e-07	0.000998806	5.56128e-07	8.34192e-06	[3]	Group20	11.828	33	[ACTB, ACTG1, ACTN4, AFDN, CD9, CDH17, CLDN1, CTNNA1, CTNNB1, CTNND1, CTTN, CXADR, DSG2, F11R, GNPAT, ILK, ITGA2, JUP, LMNB2, LSR, MPP7, NRBP1, OCLN, PAK2, PARD6B, PDCD6IP, PKP2, PKP3, PRKACA, PRKCA, PVR, SORBS1, SRC]
GO:0034329	cell junction assembly	GO_BiologicalProcess-EBI-UniProt-GOA_17.02.2020_00h00	2.36169e-07	0.000427465	5.56128e-07	8.34192e-06	[4]	Group20	13.5922	28	[ACTB, ACTG1, ACTN4, AFDN, CD9, CDH17, CLDN1, CTNNA1, CTNNB1, CTNND1, CTTN, F11R, GNPAT, ILK, ITGA2, JUP, LMNB2, LSR, MPP7, OCLN, PAK2, PARD6B, PDCD6IP, PKP2, PKP3, PRKACA, PRKCA, SORBS1]
GO:0045216	cell-cell junction organization	GO_BiologicalProcess-EBI-UniProt-GOA_17.02.2020_00h00	6.96077e-07	0.00124459	5.56128e-07	8.34192e-06	[4]	Group20	12.9032	28	[ACTB, ACTG1, ACTN4, AFDN, CD9, CDH17, CLDN1, CTNNA1, CTNNB1, CTNND1, CXADR, DSG2, F11R, GNPAT, JUP, LSR, MPP7, NRBP1, OCLN, PAK2, PARD6B, PDCD6IP, PKP2, PKP3, PRKACA, PRKCA, PVR, SRC]
GO:0007043	cell-cell junction assembly	GO_BiologicalProcess-EBI-UniProt-GOA_17.02.2020_00h00	1.16028e-07	0.000211171	5.56128e-07	8.34192e-06	[5]	Group20	16.1972	23	[ACTB, ACTG1, ACTN4, AFDN, CD9, CDH17, CLDN1, CTNNA1, CTNNB1, CTNND1, F11R, GNPAT, JUP, LSR, MPP7, OCLN, PAK2, PARD6B, PDCD6IP, PKP2, PKP3, PRKACA, PRKCA]
GO:0010941	regulation of cell death	GO_BiologicalProcess-EBI-UniProt-GOA_17.02.2020_00h00	1.79329e-07	0.000325482	1.79329e-07	2.86926e-06	[4]	Group21	6.87443	150	[ABHD14B, ACTC1, ACTN4, ADNP, AGFG1, AGR2, AIMP2, ARHGDIA, ARRB1, ATAD3A, BAX, BCAP31, BCLAF1, BIN1, BPNT1, BSG, CACYBP, CALM2, CALM3, CASP6, CAST, CCDC6, CDK11B, CDK5, CEACAM6, CHMP2A, CHMP4A, CHMP4B, CHORDC1, CTNNA1, CTNNB1, CTNND1, CTTN, DDRGK1, DDX42, DHRS4, DIABLO, DNAJA3, DNM2, DPEP1, EEF1E1, EGFR, EIF2AK2, EIF4A2, EIF4E, ENO1, EPCAM, ETF1, ETFA, FAM162A, FKBP8, GAMT, GSDME, HAX1, HSP90AB1,…
GO:0043067	regulation of programmed cell death	GO_BiologicalProcess-EBI-UniProt-GOA_17.02.2020_00h00	2.05694e-05	0.0347828	1.79329e-07	2.86926e-06	[5]	Group21	6.53465	132	[ABHD14B, ACTC1, ACTN4, ADNP, AGFG1, ARHGDIA, ARRB1, ATAD3A, BAX, BCAP31, BCLAF1, BIN1, BPNT1, BSG, CACYBP, CASP6, CAST, CCDC6, CDK11B, CDK5, CEACAM6, CTNNA1, CTNNB1, CTNND1, CTTN, DDRGK1, DDX42, DHRS4, DIABLO, DNAJA3, DNM2, DPEP1, EEF1E1, EGFR, EIF2AK2, EIF4E, ENO1, EPCAM, ETF1, ETFA, FAM162A, FKBP8, GAMT, GSDME, HAX1, HSP90AB1, HSP90B1, HSPD1, ILK, ITGAV, KALRN, KDM1A, KRT18, LDHA, LGALS3, LMNA…
GO:0060548	negative regulation of cell death	GO_BiologicalProcess-EBI-UniProt-GOA_17.02.2020_00h00	3.53691e-06	0.00616837	1.79329e-07	2.86926e-06	[5]	Group21	7.32824	96	[ABHD14B, ACTC1, ADNP, AGFG1, AGR2, ARHGDIA, ARRB1, ATAD3A, BAX, BPNT1, BSG, CACYBP, CAST, CDK5, CEACAM6, CHMP2A, CHMP4A, CHMP4B, CTNNA1, CTNNB1, CTTN, DDRGK1, DHRS4, DNAJA3, DPEP1, EGFR, EIF2AK2, EIF4A2, EIF4E, ENO1, EPCAM, FKBP8, GAMT, HAX1, HSP90AB1, HSP90B1, HSPD1, ILK, ITGAV, KDM1A, KRT18, LGALS3, LMNA, LONP1, MECP2, MSH2, MTTP, MYO18A, MYO1A, NENF, NIBAN2, NNT, NONO, NPM1, NUP62, OPA1, PAK2…
GO:0042981	regulation of apoptotic process	GO_BiologicalProcess-EBI-UniProt-GOA_17.02.2020_00h00	1.88198e-05	0.0318619	1.79329e-07	2.86926e-06	[6]	Group21	6.55328	131	[ABHD14B, ACTC1, ACTN4, ADNP, AGFG1, ARHGDIA, ARRB1, ATAD3A, BAX, BCAP31, BCLAF1, BIN1, BPNT1, BSG, CACYBP, CASP6, CAST, CCDC6, CDK11B, CDK5, CEACAM6, CTNNA1, CTNNB1, CTNND1, CTTN, DDRGK1, DDX42, DHRS4, DIABLO, DNAJA3, DNM2, DPEP1, EEF1E1, EGFR, EIF2AK2, EIF4E, ENO1, EPCAM, ETF1, ETFA, FAM162A, FKBP8, GAMT, GSDME, HAX1, HSP90AB1, HSP90B1, HSPD1, ILK, ITGAV, KALRN, KDM1A, KRT18, LDHA, LGALS3, LMNA…
GO:0051049	regulation of transport	GO_BiologicalProcess-EBI-UniProt-GOA_17.02.2020_00h00	1.68092e-05	0.0285421	1.68092e-05	8.40461e-05	[4]	Group22	6.37484	150	[ABHD14B, ACSL3, ACTB, ACTG1, ACTN4, AGFG1, AHNAK, AKAP8L, ALPP, ANK3, ANXA13, APPL1, APPL2, ARF6, ARFGAP3, ARFIP1, ARRB1, ATAD1, ATP1A1, ATP1B1, ATP1B3, ATP2B4, ATP5F1A, BAX, BCAP31, BIN1, BSG, CALM1, CALM2, CALM3, CAMK2B, CAMK2G, CCT6A, CD2AP, CDK5, CEACAM1, CHMP2A, CHORDC1, COMT, CSRP1, CTNNB1, DNM2, DPYSL2, EGFR, EHD1, EHD4, EIF4G2, EZR, FDPS, FLOT1, FMR1, GAMT, GNAS, GPR89A, GPR89B, GSTO1, H…
GO:0051050	positive regulation of transport	GO_BiologicalProcess-EBI-UniProt-GOA_17.02.2020_00h00	2.17702e-05	0.0367263	1.68092e-05	8.40461e-05	[4, 5]	Group22	7.12074	92	[ABHD14B, ACSL3, ACTB, ACTN4, ALPP, ANK3, ANXA13, APPL1, APPL2, ARF6, ARRB1, ATAD1, ATP1B1, ATP1B3, BAX, BCAP31, CALM1, CALM2, CALM3, CAMK2B, CCT6A, CD2AP, CDK5, CHMP2A, CHORDC1, DNM2, DPYSL2, EGFR, EHD1, EIF4G2, EZR, FLOT1, FMR1, GAMT, GSTO1, HGS, HSP90AB1, HSPD1, ITGA2, ITGAV, JUP, KHDRBS1, KIF5B, LGALS3, MAPK1, MAPK3, MAVS, MTTP, MYO18A, MYO1C, OCLN, PAK1, PAPSS2, PDCD10, PDCD6IP, PDHX, PICALM…
GO:0060627	regulation of vesicle-mediated transport	GO_BiologicalProcess-EBI-UniProt-GOA_17.02.2020_00h00	3.89965e-08	7.17145e-05	1.68092e-05	8.40461e-05	[4, 5]	Group22	9.39306	65	[ACSL3, ACTN4, ALPP, ANXA13, APPL1, APPL2, ARF6, ARFGAP3, ARFIP1, ARRB1, ATAD1, BIN1, CALM1, CALM2, CALM3, CD2AP, CDK5, CEACAM1, CHMP2A, DNM2, EHD1, EHD4, EZR, FDPS, FLOT1, FMR1, GAMT, HGS, ITGA2, ITGAV, KIF5B, LGALS3, MAP2K2, MAPK1, MAPK3, MTTP, MYO18A, PACSIN2, PACSIN3, PAPSS2, PDCD6IP, PICALM, PPP5C, PRKAA1, PRKCSH, PTPN23, RAB10, RAB25, RAB8A, RAB9A, RAC1, RALA, RALB, SCFD1, SH3GL1, SNAPIN, S…
GO:0030100	regulation of endocytosis	GO_BiologicalProcess-EBI-UniProt-GOA_17.02.2020_00h00	1.27978e-06	0.0022665	1.68092e-05	8.40461e-05	[5, 6]	Group22	11.5942	32	[ACTN4, APPL1, APPL2, ARF6, ARFGAP3, ARRB1, ATAD1, BIN1, CALM1, CALM2, CALM3, CD2AP, DNM2, EHD4, FLOT1, FMR1, GAMT, ITGA2, LGALS3, MTTP, PACSIN2, PACSIN3, PDCD6IP, PICALM, PPP5C, RAC1, SH3GL1, SRC, SYMPK, TSG101, VTN, WASL]
GO:0010608	posttranscriptional regulation of gene expression	GO_BiologicalProcess-EBI-UniProt-GOA_17.02.2020_00h00	2.19848e-13	4.26065e-10	6.93982e-14	2.49834e-12	[6]	Group23	11.0193	80	[ABCF1, ALPP, CDC37, CELF1, DDX39B, EEF1A1, EEF1A1P5, EEF1B2, EEF1D, EEF2, EIF2AK2, EIF2B1, EIF2S2, EIF3A, EIF3E, EIF3H, EIF3J, EIF3M, EIF4A1, EIF4A2, EIF4B, EIF4E, EIF4G2, EIF5, EPB41L5, ETF1, EXOSC6, FMR1, FUS, FXR2, GFM2, HNRNPM, HNRNPU, IGF2BP1, IGF2BP2, IGF2BP3, ITGA2, KHDRBS1, KHSRP, LARP1, LARP4B, MAPK1, MAPK3, MATR3, MTIF2, NCL, NPM1, NSUN2, PKP3, PRKACA, PRKCA, PRKCD, PRKCSH, PRKRA, PSMC…
GO:1903311	regulation of mRNA metabolic process	GO_BiologicalProcess-EBI-UniProt-GOA_17.02.2020_00h00	2.37707e-06	0.00417888	6.93982e-14	2.49834e-12	[6, 7]	Group23	9.79499	43	[CDK11A, CDK11B, CELF1, DDX5, EIF4A2, EIF4E, ETF1, EXOSC6, FMR1, FUS, FXR2, HGS, HNRNPM, HNRNPU, IGF2BP1, IGF2BP2, IGF2BP3, IK, KHDRBS1, KHSRP, LARP1, MARCKSL1, MBNL1, NCL, NPM1, NUP98, PDAP1, PKP3, PRKACA, PRKCA, PRKCD, PSMC6, PSMD8, PSME1, PSMF1, RBM4, RBM4B, SNRNP70, SRSF10, SRSF5, THRAP3, TNPO1, YBX1]
GO:0048024	regulation of mRNA splicing, via spliceosome	GO_BiologicalProcess-EBI-UniProt-GOA_17.02.2020_00h00	2.54753e-05	0.0427476	6.93982e-14	2.49834e-12	[7, 8, 9]	Group23	13.8462	18	[CELF1, DDX5, FMR1, FXR2, HGS, HNRNPU, IK, KHDRBS1, MARCKSL1, MBNL1, NCL, NUP98, RBM4, RBM4B, SNRNP70, SRSF10, SRSF5, THRAP3]
GO:0000381	regulation of alternative mRNA splicing, via spliceosome	GO_BiologicalProcess-EBI-UniProt-GOA_17.02.2020_00h00	9.62694e-06	0.0165006	6.93982e-14	2.49834e-12	[8, 9, 10]	Group23	17.0455	15	[CELF1, DDX5, FMR1, FXR2, HGS, HNRNPU, IK, KHDRBS1, MARCKSL1, MBNL1, RBM4, RBM4B, SRSF10, SRSF5, THRAP3]
GO:0044403	symbiotic process	GO_BiologicalProcess-EBI-UniProt-GOA_17.02.2020_00h00	9.85196e-25	1.94675e-21	1.31915e-29	5.93618e-28	[3]	Group24	11.7803	133	[ABI1, ACBD3, AGFG1, AKAP8L, ATP6V1H, BAX, BCAP31, BIN1, CALM1, CALM2, CALM3, CAPG, CD55, CDK5RAP3, CHMP1A, CHMP2A, CHMP4A, CHMP4B, CHMP5, CLDN1, COPB1, COPS7A, COPS7B, CSRP1, CTNNB1, CTNND1, CXADR, DDX39B, DEK, DHRS4, EGFR, EIF2AK2, EIF3A, EIF3M, EIF4A1, EIF4A2, EIF4E, F11R, FDPS, FKBP8, FMR1, FUS, G3BP2, HMGA1, HNRNPU, HSP90AA1, HSP90AB1, HSPD1, IK, ITGA2, ITGAV, KALRN, KPNB1, KRT18, MAPK1, MAP…
GO:0016032	viral process	GO_BiologicalProcess-EBI-UniProt-GOA_17.02.2020_00h00	1.33353e-24	2.63372e-21	1.31915e-29	5.93618e-28	[4]	Group24	12.2651	124	[ABI1, ACBD3, AGFG1, AKAP8L, ATP6V1H, BAX, BCAP31, BIN1, CALM1, CALM2, CALM3, CAPG, CD55, CDK5RAP3, CHMP1A, CHMP2A, CHMP4A, CHMP4B, CHMP5, CLDN1, COPB1, COPS7A, COPS7B, CTNNB1, CXADR, DEK, DHRS4, EGFR, EIF2AK2, EIF3A, EIF3M, EIF4A1, EIF4A2, EIF4E, F11R, FDPS, FKBP8, FMR1, G3BP2, HMGA1, HNRNPU, HSP90AA1, HSP90AB1, HSPD1, IK, ITGA2, ITGAV, KALRN, KPNB1, KRT18, MAPK1, MAPK3, MAVS, NPM1, NUP107, NUP1…
GO:0019058	viral life cycle	GO_BiologicalProcess-EBI-UniProt-GOA_17.02.2020_00h00	3.78386e-09	7.0569e-06	1.31915e-29	5.93618e-28	[5]	Group24	13.6882	36	[CAPG, CD55, CHMP1A, CHMP2A, CHMP4A, CHMP4B, CHMP5, CLDN1, CXADR, DEK, DHRS4, EGFR, F11R, HSP90AB1, ITGA2, ITGAV, KPNB1, NUP107, NUP155, NUP160, NUP50, NUP58, NUP62, NUP85, NUP88, NUP98, PC, PCBP1, PCBP2, PDCD6IP, PVR, RAB1B, RAN, SCARB2, SLC1A5, TSG101]
GO:0019080	viral gene expression	GO_BiologicalProcess-EBI-UniProt-GOA_17.02.2020_00h00	2.98956e-16	5.85654e-13	1.31915e-29	5.93618e-28	[5]	Group24	22.093	38	[EIF3A, NUP107, NUP155, NUP160, NUP50, NUP58, NUP62, NUP85, NUP88, NUP98, PCBP2, RPL11, RPL12, RPL13, RPL17, RPL17-C18orf32, RPL19, RPL21, RPL23A, RPL27A, RPL31, RPL5, RPL6, RPL8, RPL9, RPLP2, RPS14, RPS2, RPS20, RPS26, RPS27, RPS3, RPS3A, RPS4X, RPS5, RPS6, RPS7, SLC16A1]
GO:0072594	establishment of protein localization to organelle	GO_BiologicalProcess-EBI-UniProt-GOA_17.02.2020_00h00	9.40012e-24	1.85276e-20	1.31915e-29	5.93618e-28	[4, 5, 6]	Group24	15.4399	86	[ACAA1, AGFG1, AGPS, AIP, AP3B1, APPL1, APPL2, BAX, CALM1, CALM2, CALM3, CHMP4A, CHMP4B, CTNND1, DDX27, DHRS4, DNM2, ECI2, GET3, GNPAT, GRPEL1, GSTK1, HGS, HSD17B4, HSP90AA1, HSPD1, IPO9, KALRN, KPNB1, LMNA, LONP1, MMAB, NUP107, NUP155, NUP50, NUP62, NUP85, NUP88, NUP98, OXA1L, PEX14, PHB2, RAB10, RAN, RPL11, RPL12, RPL13, RPL17, RPL17-C18orf32, RPL19, RPL21, RPL23A, RPL27A, RPL31, RPL5, RPL6, RP…
GO:0022411	cellular component disassembly	GO_BiologicalProcess-EBI-UniProt-GOA_17.02.2020_00h00	6.85278e-07	0.00122596	4.39191e-11	1.31757e-09	[3]	Group25	9.95671	46	[ACIN1, AIP, AKAP8L, BSG, CDK5, CDK5RAP3, CFL2, CHMP1A, CHMP2A, CHMP5, CSNK1A1, CTNNB1, DCTN1, ETF1, FLOT1, GFM2, HMGA1, KIF5B, KPNB1, LMNB2, MRPL11, MRPL16, MRPL19, MRPL24, MRPL3, MRPL38, MRPL9, MRPS31, MRPS36, MTIF2, NRBP1, OXA1L, PEX14, PRKACA, PRKCA, PYM1, RPL17, SH3GL1, SLC16A1, SNAPIN, SQSTM1, STMN1, STX5, TSG101, UBQLN1, VIL1]
GO:0032984	protein-containing complex disassembly	GO_BiologicalProcess-EBI-UniProt-GOA_17.02.2020_00h00	1.45144e-06	0.00256615	4.39191e-11	1.31757e-09	[4]	Group25	11.9522	30	[AIP, CFL2, CHMP1A, CHMP2A, CHMP5, CSNK1A1, CTNNB1, ETF1, GFM2, HMGA1, KIF5B, MRPL11, MRPL16, MRPL19, MRPL24, MRPL3, MRPL38, MRPL9, MRPS31, MRPS36, OXA1L, PEX14, PYM1, RPL17, SH3GL1, SNAPIN, STMN1, TSG101, UBQLN1, VIL1]
GO:0140053	mitochondrial gene expression	GO_BiologicalProcess-EBI-UniProt-GOA_17.02.2020_00h00	1.90004e-07	0.000344287	4.39191e-11	1.31757e-09	[5]	Group25	15.2866	24	[AIP, DARS2, GFM2, HGS, IARS2, MRPL11, MRPL16, MRPL19, MRPL24, MRPL3, MRPL38, MRPL9, MRPS31, MRPS36, MTIF2, OXA1L, SRSF5, SUPV3L1, TFAM, TRMT10C, TSFM, TUFM, WARS2, YARS2]
GO:0006414	translational elongation	GO_BiologicalProcess-EBI-UniProt-GOA_17.02.2020_00h00	7.09191e-06	0.0122406	4.39191e-11	1.31757e-09	[5, 6, 7, 8]	Group25	14.0845	20	[AIP, EEF1A1, EEF1A1P5, EEF1B2, EEF1D, EEF2, GFM2, MRPL11, MRPL16, MRPL19, MRPL24, MRPL3, MRPL38, MRPL9, MRPS31, MRPS36, OXA1L, RPLP2, TSFM, TUFM]
GO:0032543	mitochondrial translation	GO_BiologicalProcess-EBI-UniProt-GOA_17.02.2020_00h00	1.88552e-07	0.000341844	4.39191e-11	1.31757e-09	[6, 7, 8]	Group25	16.9355	21	[AIP, DARS2, GFM2, HGS, IARS2, MRPL11, MRPL16, MRPL19, MRPL24, MRPL3, MRPL38, MRPL9, MRPS31, MRPS36, MTIF2, OXA1L, SRSF5, TSFM, TUFM, WARS2, YARS2]
GO:0010256	endomembrane system organization	GO_BiologicalProcess-EBI-UniProt-GOA_17.02.2020_00h00	1.44245e-06	0.00255169	7.6251e-13	2.59254e-11	[3]	Group26	9.3633	50	[AGFG1, AKAP8L, ANK3, ATL2, BAIAP2, BIN1, CHMP1A, CHMP2A, CHMP4A, CHMP4B, CHMP5, CSNK1A1, DCTN1, DEGS1, FLOT1, GET3, GORASP2, HGS, KALRN, LEMD2, LMAN1, LMNA, MARCKSL1, MYO18A, NDRG1, NPLOC4, NUP155, PACSIN2, PACSIN3, PDCD10, PDCD6IP, PPP2R1A, PRKACA, PRKCA, RAB10, SEC23IP, SEC61A1, SHTN1, SNX9, SQSTM1, SRSF5, STX4, STX5, SUGT1, SUN1, TMED9, TSG101, USO1, VAPB, ZMPSTE24]
GO:0061024	membrane organization	GO_BiologicalProcess-EBI-UniProt-GOA_17.02.2020_00h00	5.43046e-16	1.0622e-12	7.6251e-13	2.59254e-11	[3]	Group26	10.3746	108	[ACTB, ACTG1, AFG3L2, AGFG1, AKAP8L, ANK3, AP3B1, ARFGAP3, ARRB1, ATL2, ATP1B1, ATP5F1A, ATP5F1B, ATP5F1C, ATP5F1D, ATP5PB, ATP5PD, ATP5PO, BAIAP2, BAX, BIN1, CALM1, CALM2, CALM3, CD9, CHCHD3, CHMP1A, CHMP2A, CHMP4A, CHMP4B, CHMP5, CHORDC1, CTTN, CXADR, DCTN1, DEGS1, DNAJA3, DNAJC11, DNM2, EGFR, EPN1, FCHO2, FLOT1, FOLR1, GET3, GNPAT, HGS, HSP90AA1, IMMT, KALRN, LEMD2, LETM1, LMAN1, LMNA, MAPK1, …
GO:0006997	nucleus organization	GO_BiologicalProcess-EBI-UniProt-GOA_17.02.2020_00h00	2.44756e-06	0.00430036	7.6251e-13	2.59254e-11	[4]	Group26	13.6905	23	[AGFG1, AKAP8L, BIN1, CHMP1A, CHMP2A, CHMP4A, CHMP4B, CHMP5, DCTN1, KALRN, LEMD2, LMNA, NUP107, NUP155, NUP98, PES1, PITPNB, PPP2R1A, PRKACA, PRKCA, SF1, SUN1, ZMPSTE24]
GO:0016050	vesicle organization	GO_BiologicalProcess-EBI-UniProt-GOA_17.02.2020_00h00	8.35784e-06	0.0143671	7.6251e-13	2.59254e-11	[4]	Group26	9.75	39	[AGFG1, AP3B1, ARFGAP3, CALM2, CALM3, CD2AP, CHMP1A, CHMP2A, CHMP4A, CHMP4B, CHMP5, DNM2, FOLR1, HGS, LMAN1, MYO18A, PDCD6, PDCD6IP, PICALM, RAB1B, RAB8A, SCFD1, SEC23IP, SEC24A, SEC24C, SLC25A4, SNAP23, SNAPIN, SQSTM1, SRSF5, STX3, STX4, STX5, TFG, TMED9, TSG101, USO1, VAPB, WASL]
GO:0006998	nuclear envelope organization	GO_BiologicalProcess-EBI-UniProt-GOA_17.02.2020_00h00	7.34471e-06	0.0126696	7.6251e-13	2.59254e-11	[4, 5]	Group26	19.697	13	[AKAP8L, CHMP2A, CHMP4A, CHMP4B, DCTN1, LEMD2, LMNA, NUP155, PPP2R1A, PRKACA, PRKCA, SUN1, ZMPSTE24]
GO:0032886	regulation of microtubule-based process	GO_BiologicalProcess-EBI-UniProt-GOA_17.02.2020_00h00	7.42937e-06	0.0128082	3.8217e-08	8.78991e-07	[4]	Group27	10.5431	33	[ABHD14B, ATP6V1H, CACYBP, CHMP1A, CHMP2A, CHMP4A, CHMP4B, CHMP5, CHORDC1, COASY, CTNNB1, DCTN1, FDPS, HNRNPU, MAPRE1, MECP2, MTTP, NDRG1, NPM1, NUP62, OCLN, PAK1, PDCD6IP, PICALM, PRKAA1, RAB6C, RAC1, RANBP1, RBM14, RPS3, STAG2, STMN1, TUBB]
GO:0051493	regulation of cytoskeleton organization	GO_BiologicalProcess-EBI-UniProt-GOA_17.02.2020_00h00	4.6715e-09	8.70767e-06	3.8217e-08	8.78991e-07	[6]	Group27	9.59666	69	[ABHD14B, ACTG1, ADD1, ARF6, ARFIP1, ARFIP2, ARHGDIA, ATP6V1H, BAIAP2, BIN1, CACYBP, CAPG, CAPZB, CD2AP, CDK5, CFL2, CHMP1A, CHMP2A, CHMP4A, CHMP4B, CHMP5, CHORDC1, COASY, CTNNB1, CTTN, DCTN1, EPS8, F11R, FDPS, HAX1, HNRNPU, ILK, IQGAP2, LIMA1, MAPK1, MAPK3, MAPRE1, MECP2, MTTP, MYO1C, NDRG1, NPM1, NUP62, OCLN, PAK1, PAK2, PDCD6IP, PFDN2, PICALM, PRKAA1, PRKCD, PTMA, PXN, RAB6C, RAC1, RANBP1, RBM…
GO:0070507	regulation of microtubule cytoskeleton organization	GO_BiologicalProcess-EBI-UniProt-GOA_17.02.2020_00h00	2.60369e-07	0.000470747	3.8217e-08	8.78991e-07	[5, 7]	Group27	12.2222	33	[ABHD14B, ATP6V1H, CACYBP, CHMP1A, CHMP2A, CHMP4A, CHMP4B, CHMP5, CHORDC1, COASY, CTNNB1, DCTN1, FDPS, HNRNPU, MAPRE1, MECP2, MTTP, NDRG1, NPM1, NUP62, OCLN, PAK1, PDCD6IP, PICALM, PRKAA1, RAB6C, RAC1, RANBP1, RBM14, RPS3, STAG2, STMN1, TUBB]
GO:0046605	regulation of centrosome cycle	GO_BiologicalProcess-EBI-UniProt-GOA_17.02.2020_00h00	9.05377e-07	0.00161338	3.8217e-08	8.78991e-07	[6, 8]	Group27	18.2796	17	[ATP6V1H, CACYBP, CHMP1A, CHMP2A, CHMP4A, CHMP4B, CHMP5, CHORDC1, COASY, CTNNB1, NPM1, NUP62, PDCD6IP, PICALM, RAB6C, RANBP1, RBM14]
GO:0010824	regulation of centrosome duplication	GO_BiologicalProcess-EBI-UniProt-GOA_17.02.2020_00h00	1.43539e-06	0.00254064	3.8217e-08	8.78991e-07	[7, 9]	Group27	19.7368	15	[ATP6V1H, CACYBP, CHMP1A, CHMP2A, CHMP4A, CHMP4B, CHMP5, CHORDC1, COASY, NPM1, NUP62, PDCD6IP, PICALM, RAB6C, RBM14]
GO:0006996	organelle organization	GO_BiologicalProcess-EBI-UniProt-GOA_17.02.2020_00h00	6.84435e-23	1.34765e-19	7.96435e-23	3.42467e-21	[3]	Group28	7.57651	307	[ABHD14B, ABI1, ABRAXAS2, ACAA1, ACIN1, ACTB, ACTC1, ACTG1, ACTL8, ACTN4, ADD1, AFG3L2, AGFG1, AGPS, AIP, AKAP8L, ALPP, ANK3, AP3B1, ARF6, ARFGAP3, ARFIP2, ARRB1, ATAD3A, ATL2, ATP5F1A, ATP5F1B, ATP5F1C, ATP5F1D, ATP5PB, ATP5PD, ATP5PO, ATP6V1A, ATP6V1B2, ATP6V1D, ATP6V1E1, ATP6V1G1, ATP6V1H, BAIAP2, BAX, BIN1, BRCC3, CACYBP, CALM1, CALM2, CALM3, CAMK2B, CAPG, CAPZB, CCDC115, CCDC6, CD2AP, CDK5, …
GO:0097435	supramolecular fiber organization	GO_BiologicalProcess-EBI-UniProt-GOA_17.02.2020_00h00	4.74676e-06	0.00825461	7.96435e-23	3.42467e-21	[3]	Group28	8.84354	52	[ABHD14B, ABI1, ACTC1, ACTG1, ACTN4, ADD1, AGFG1, ALPP, ARRB1, BAIAP2, CD2AP, CFL2, CHORDC1, CORO7, CORO7-PAM16, CSRP1, CTNND1, CTTN, EPS8, EZR, GAMT, HSP90AB1, HSP90B1, ILK, INPPL1, IQGAP2, KPNB1, LIMA1, MAPRE1, MARCKS, MARCKSL1, MTTP, PICALM, PKP2, PLOD3, PLS1, PTMA, RAC1, RHOG, SERPINH1, SHTN1, SLK, SORBS1, SRC, STMN1, TMEM245, TMOD3, TPM1, TPM3, VIL1, WASF2, WASL]
GO:0007010	cytoskeleton organization	GO_BiologicalProcess-EBI-UniProt-GOA_17.02.2020_00h00	1.57642e-11	3.02201e-08	7.96435e-23	3.42467e-21	[4]	Group28	8.57558	118	[ABHD14B, ABI1, ABRAXAS2, ACTB, ACTC1, ACTG1, ACTL8, ACTN4, ADD1, AGFG1, ALPP, ANK3, ARF6, ARFIP2, ARRB1, BAIAP2, BIN1, CACYBP, CALM1, CALM2, CALM3, CAMK2B, CAPZB, CCDC6, CD2AP, CDK5, CETN2, CFL2, CHORDC1, CHTOP, CORO7, CORO7-PAM16, CSNK1A1, CSRP1, CTNNB1, CTNND1, CTTN, CXADR, DCTN1, DCTN2, DPYSL2, EPB41L1, EPB41L2, EPB41L5, EPS8, EZR, F11R, FDPS, GAN, HSP90AA1, HSP90B1, INPPL1, IQGAP2, JUP, KPNB…
GO:0030036	actin cytoskeleton organization	GO_BiologicalProcess-EBI-UniProt-GOA_17.02.2020_00h00	5.00452e-08	9.16829e-05	7.96435e-23	3.42467e-21	[3, 5]	Group28	9.48012	62	[ABI1, ACTB, ACTC1, ACTG1, ACTL8, ACTN4, ADD1, ALPP, ARF6, ARFIP2, ARRB1, BAIAP2, CAPZB, CD2AP, CDK5, CFL2, CORO7, CORO7-PAM16, CSRP1, CTNND1, CTTN, CXADR, EPB41L1, EPB41L2, EPB41L5, EPS8, EZR, F11R, HSP90B1, INPPL1, IQGAP2, LIMA1, LLGL2, MARCKS, MARCKSL1, MMAB, MTTP, MYO18A, PACSIN2, PAK1, PDCD6IP, PDLIM5, PLS1, PTMA, RAC1, RALA, RHOG, RPL9, SHTN1, SLC9A3R1, SORBS1, SRC, SSH3, TMOD3, TNPO1, TPM1…
GO:0007015	actin filament organization	GO_BiologicalProcess-EBI-UniProt-GOA_17.02.2020_00h00	1.79085e-06	0.00315726	7.96435e-23	3.42467e-21	[4, 6]	Group28	11.2957	34	[ABI1, ACTC1, ACTN4, ADD1, ALPP, ARRB1, BAIAP2, CD2AP, CFL2, CORO7, CORO7-PAM16, CTNND1, CTTN, EPS8, EZR, HSP90B1, INPPL1, IQGAP2, LIMA1, MARCKS, MTTP, PLS1, PTMA, RAC1, RHOG, SHTN1, SORBS1, SRC, TMOD3, TPM1, TPM3, VIL1, WASF2, WASL]
GO:0009894	regulation of catabolic process	GO_BiologicalProcess-EBI-UniProt-GOA_17.02.2020_00h00	4.72318e-11	8.99765e-08	4.72318e-11	1.36972e-09	[4]	Group29	8.66824	110	[ATP2B4, ATP6V1A, ATP6V1B2, ATP6V1D, ATP6V1E1, ATP6V1G1, ATP6V1H, BAX, BCAP31, CACYBP, CDC37, CDK5, CDK5RAP3, CHMP4A, CHMP4B, CSNK1A1, CTTN, CUL4B, DDRGK1, EEF1A1, EGFR, EIF3A, EIF4A2, EIF4E, EIF4G2, ETF1, EXOSC6, EZR, FMR1, FOLR1, FUS, FXR2, HAX1, HGS, HNRNPM, HNRNPU, HSP90AA1, HSP90AB1, IGF2BP1, IGF2BP2, IGF2BP3, KHSRP, LARP1, LLGL2, LONP1, MAPK3, MTTP, NAMPT, NNT, NPM1, NSUN2, NUP107, NUP155, …
GO:0009895	negative regulation of catabolic process	GO_BiologicalProcess-EBI-UniProt-GOA_17.02.2020_00h00	1.07006e-06	0.0019015	4.72318e-11	1.36972e-09	[5]	Group29	10.1942	42	[ATP2B4, CDK5RAP3, CHMP4A, CHMP4B, DDRGK1, EGFR, EIF4A2, EIF4E, EIF4G2, FMR1, FOLR1, FUS, HNRNPU, HSP90AB1, IGF2BP1, LARP1, LLGL2, NAMPT, NSUN2, PDCD6IP, PHB, PKP3, POLDIP2, PRKAA1, PSEN1, PSMF1, RPL11, RPL17, RPL5, RPS7, SCFD1, SCO1, SIRT2, SNRNP70, SUGT1, THRAP3, TIGAR, TMEM245, UBAC2, UBXN1, USP14, YBX1]
GO:0031329	regulation of cellular catabolic process	GO_BiologicalProcess-EBI-UniProt-GOA_17.02.2020_00h00	4.93193e-09	9.18325e-06	4.72318e-11	1.36972e-09	[5]	Group29	8.59301	91	[ATP2B4, ATP6V1A, ATP6V1B2, ATP6V1D, ATP6V1E1, ATP6V1G1, ATP6V1H, BAX, BCAP31, CACYBP, CDC37, CDK5, CDK5RAP3, CHMP4A, CHMP4B, CSNK1A1, CTTN, DDRGK1, EEF1A1, EIF4A2, EIF4E, EIF4G2, ETF1, EXOSC6, EZR, FMR1, FUS, FXR2, HAX1, HNRNPM, HNRNPU, HSP90AA1, HSP90AB1, IGF2BP1, IGF2BP2, IGF2BP3, KHSRP, LARP1, LONP1, MAPK3, MTTP, NAMPT, NNT, NPM1, NSUN2, PACSIN3, PAFAH1B2, PDCD6IP, PKP3, POLDIP2, PRKAA1, PRKA…
GO:0010506	regulation of autophagy	GO_BiologicalProcess-EBI-UniProt-GOA_17.02.2020_00h00	4.15304e-06	0.00723044	4.72318e-11	1.36972e-09	[6]	Group29	9.80861	41	[ATP6V1A, ATP6V1B2, ATP6V1D, ATP6V1E1, ATP6V1G1, ATP6V1H, CACYBP, CDC37, CDK5, CHMP4A, CHMP4B, CTTN, EEF1A1, EIF4A2, EIF4E, EIF4G2, HAX1, LARP1, MAPK3, MTTP, NAMPT, PAFAH1B2, POLDIP2, PRKAA1, PRKACA, PRKAG1, PRKCA, RAB1B, RAB8A, RALB, RBM14, SCFD1, SIRT2, SNRNP70, SNX5, TIGAR, TMEM245, UBQLN1, USP10, VDAC1, ZMPSTE24]
GO:0031330	negative regulation of cellular catabolic process	GO_BiologicalProcess-EBI-UniProt-GOA_17.02.2020_00h00	6.76383e-07	0.00121072	4.72318e-11	1.36972e-09	[6]	Group29	11.1446	37	[ATP2B4, CDK5RAP3, CHMP4A, CHMP4B, DDRGK1, EIF4A2, EIF4E, EIF4G2, FMR1, FUS, HNRNPU, HSP90AB1, IGF2BP1, LARP1, NAMPT, NSUN2, PDCD6IP, PKP3, POLDIP2, PSEN1, PSMF1, RPL11, RPL17, RPL5, RPS7, SCFD1, SCO1, SIRT2, SNRNP70, SUGT1, THRAP3, TIGAR, TMEM245, UBAC2, UBXN1, USP14, YBX1]
GO:0016241	regulation of macroautophagy	GO_BiologicalProcess-EBI-UniProt-GOA_17.02.2020_00h00	4.83818e-06	0.00840877	4.72318e-11	1.36972e-09	[7]	Group29	12.5	25	[ATP6V1A, ATP6V1B2, ATP6V1D, ATP6V1E1, ATP6V1G1, ATP6V1H, CDC37, CDK5, CHMP4A, CHMP4B, LARP1, MAPK3, PAFAH1B2, POLDIP2, PRKAA1, PRKACA, PRKAG1, PRKCA, RAB1B, RALB, SCFD1, SNX5, TIGAR, TMEM245, UBQLN1]
GO:0006793	phosphorus metabolic process	GO_BiologicalProcess-EBI-UniProt-GOA_17.02.2020_00h00	3.57961e-10	6.75114e-07	3.70688e-10	1.00086e-08	[3]	Group30	7.07728	185	[AASS, ABHD14B, ABI1, ACAT1, ACP6, ACSL3, ACSL5, AGFG1, AGPAT1, AK2, AK4, AKAP8L, ALDH18A1, ALDOC, ALPG, ALPP, APRT, ATP1A1, ATP5F1A, ATP5F1B, ATP5F1C, ATP5F1D, ATP5PB, ATP5PD, ATP5PO, BPNT1, CALM1, CALM2, CALM3, CAMK2B, CAMK2G, CCDC6, CCT2, CDK11A, CDK11B, CDK5, CKB, COASY, COPS8, COQ8A, COX5B, CPS1, CRYL1, CSNK1A1, DCTPP1, DLAT, DNPH1, DOLPP1, DPM1, DTYMK, EGFR, EIF2AK2, ENO1, ETF1, FDPS, FN3KR…
GO:0019637	organophosphate metabolic process	GO_BiologicalProcess-EBI-UniProt-GOA_17.02.2020_00h00	1.77077e-12	3.41582e-09	3.70688e-10	1.00086e-08	[3, 4]	Group30	9.43571	102	[AASS, ABHD14B, ACAT1, ACP6, ACSL3, ACSL5, AGPAT1, AK2, AK4, ALDOC, ALPP, APRT, ATP5F1A, ATP5F1B, ATP5F1C, ATP5F1D, ATP5PB, ATP5PD, ATP5PO, BPNT1, CALM1, CALM2, CALM3, CCT2, CKB, COASY, COX5B, CPS1, CRYL1, DCTPP1, DLAT, DNPH1, DOLPP1, DPM1, DTYMK, ENO1, FDPS, FOLR1, GALK1, GCDH, GFER, GFPT1, GK, GK3P, GMPS, GNPAT, HADHA, HADHB, HDHD5, HMGCS2, HPRT1, HSD17B12, HSD17B4, HSD17B8, IMPA1, INPPL1, ITPA…
GO:0006796	phosphate-containing compound metabolic process	GO_BiologicalProcess-EBI-UniProt-GOA_17.02.2020_00h00	9.94673e-11	1.88988e-07	3.70688e-10	1.00086e-08	[4]	Group30	7.18447	185	[AASS, ABHD14B, ABI1, ACAT1, ACP6, ACSL3, ACSL5, AGFG1, AGPAT1, AK2, AK4, AKAP8L, ALDH18A1, ALDOC, ALPG, ALPP, APRT, ATP1A1, ATP5F1A, ATP5F1B, ATP5F1C, ATP5F1D, ATP5PB, ATP5PD, ATP5PO, BPNT1, CALM1, CALM2, CALM3, CAMK2B, CAMK2G, CCDC6, CCT2, CDK11A, CDK11B, CDK5, CKB, COASY, COPS8, COQ8A, COX5B, CPS1, CRYL1, CSNK1A1, DCTPP1, DLAT, DNPH1, DOLPP1, DPM1, DTYMK, EGFR, EIF2AK2, ENO1, ETF1, FDPS, FN3KR…
GO:0055086	nucleobase-containing small molecule metabolic process	GO_BiologicalProcess-EBI-UniProt-GOA_17.02.2020_00h00	1.0294e-10	1.95484e-07	3.70688e-10	1.00086e-08	[3, 4, 5]	Group30	10.4863	69	[AASS, ABHD14B, ACAT1, ACSL3, ACSL5, AGPAT1, AK2, AK4, ALDH6A1, ALDOC, APRT, ATP5F1A, ATP5F1B, ATP5F1C, ATP5F1D, ATP5PB, ATP5PD, ATP5PO, BPNT1, CNPY2, COASY, COX5B, CPS1, DCTPP1, DLAT, DNPH1, DPM1, DTYMK, ENO1, GALK1, GCDH, GFPT1, GMPS, HMGCS2, HPRT1, HSD17B12, HSD17B4, HSD17B8, ITPA, KDM1A, LDHA, MAPK1, MCCC2, MTHFD1, NADK2, NAMPT, NDRG1, NT5E, NUDT4, OPA1, PAICS, PAPSS2, PDHX, PGM1, PKM, PNKP, …
GO:0090407	organophosphate biosynthetic process	GO_BiologicalProcess-EBI-UniProt-GOA_17.02.2020_00h00	4.63315e-10	8.72886e-07	3.70688e-10	1.00086e-08	[4, 5]	Group30	10.241	68	[ACAT1, ACP6, ACSL3, ACSL5, AGPAT1, AK2, AK4, ALPP, APRT, ATP5F1A, ATP5F1B, ATP5F1C, ATP5F1D, ATP5PB, ATP5PD, ATP5PO, CCT2, CKB, COASY, COX5B, CPS1, CRYL1, DLAT, DOLPP1, DPM1, DTYMK, FDPS, GCDH, GFER, GK, GK3P, GMPS, GNPAT, HDHD5, HMGCS2, HPRT1, HSD17B12, HSD17B8, IMPA1, INPPL1, LPGAT1, MAPK1, MAVS, MTHFD1, NADK2, NAMPT, NFS1, PAICS, PAPSS2, PCYT2, PDHX, PHGDH, PKM, PLCB3, PLCD3, PNKP, PPP5C, PRK…
GO:0006753	nucleoside phosphate metabolic process	GO_BiologicalProcess-EBI-UniProt-GOA_17.02.2020_00h00	4.54747e-11	8.66748e-08	3.70688e-10	1.00086e-08	[4, 5, 6]	Group30	11.2933	62	[AASS, ABHD14B, ACAT1, ACSL3, ACSL5, AGPAT1, AK2, AK4, ALDOC, APRT, ATP5F1A, ATP5F1B, ATP5F1C, ATP5F1D, ATP5PB, ATP5PD, ATP5PO, BPNT1, COASY, COX5B, DCTPP1, DLAT, DNPH1, DTYMK, ENO1, GALK1, GCDH, GMPS, HMGCS2, HPRT1, HSD17B12, HSD17B4, HSD17B8, ITPA, LDHA, MAPK1, MCCC2, MTHFD1, NADK2, NAMPT, NT5E, NUDT4, OPA1, PAICS, PAPSS2, PDHX, PGM1, PKM, PNKP, PPP5C, PRPSAP2, RAN, SFN, SLC25A1, SLC25A13, STOM…
GO:0016310	phosphorylation	GO_BiologicalProcess-EBI-UniProt-GOA_17.02.2020_00h00	6.59222e-06	0.0113979	3.70688e-10	1.00086e-08	[5]	Group30	6.97085	110	[ABI1, AGFG1, AK2, AK4, AKAP8L, ALDH18A1, ALDOC, ATP5F1A, ATP5F1B, ATP5F1C, ATP5F1D, ATP5PB, ATP5PD, ATP5PO, BPNT1, CALM1, CALM2, CALM3, CAMK2B, CAMK2G, CCDC6, CDK11A, CDK11B, CDK5, CKB, COASY, COPS8, COQ8A, COX5B, CSNK1A1, DTYMK, EGFR, EIF2AK2, ENO1, ETF1, FDPS, FN3KRP, GALK1, GFER, GK, GK3P, ILK, IMPA1, ITGAV, KALRN, LDHA, LLGL2, LONP1, MAP2K2, MAPK1, MAPK3, MAVS, MECP2, MMAB, MSH2, MTTP, NADK2…
GO:0009117	nucleotide metabolic process	GO_BiologicalProcess-EBI-UniProt-GOA_17.02.2020_00h00	3.20852e-11	6.11865e-08	3.70688e-10	1.00086e-08	[5, 6, 7]	Group30	11.418	62	[AASS, ABHD14B, ACAT1, ACSL3, ACSL5, AGPAT1, AK2, AK4, ALDOC, APRT, ATP5F1A, ATP5F1B, ATP5F1C, ATP5F1D, ATP5PB, ATP5PD, ATP5PO, BPNT1, COASY, COX5B, DCTPP1, DLAT, DNPH1, DTYMK, ENO1, GALK1, GCDH, GMPS, HMGCS2, HPRT1, HSD17B12, HSD17B4, HSD17B8, ITPA, LDHA, MAPK1, MCCC2, MTHFD1, NADK2, NAMPT, NT5E, NUDT4, OPA1, PAICS, PAPSS2, PDHX, PGM1, PKM, PNKP, PPP5C, PRPSAP2, RAN, SFN, SLC25A1, SLC25A13, STOM…
GO:0006996	organelle organization	GO_BiologicalProcess-EBI-UniProt-GOA_17.02.2020_00h00	6.84435e-23	1.34765e-19	7.15276e-37	3.43332e-35	[3]	Group31	7.57651	307	[ABHD14B, ABI1, ABRAXAS2, ACAA1, ACIN1, ACTB, ACTC1, ACTG1, ACTL8, ACTN4, ADD1, AFG3L2, AGFG1, AGPS, AIP, AKAP8L, ALPP, ANK3, AP3B1, ARF6, ARFGAP3, ARFIP2, ARRB1, ATAD3A, ATL2, ATP5F1A, ATP5F1B, ATP5F1C, ATP5F1D, ATP5PB, ATP5PD, ATP5PO, ATP6V1A, ATP6V1B2, ATP6V1D, ATP6V1E1, ATP6V1G1, ATP6V1H, BAIAP2, BAX, BIN1, BRCC3, CACYBP, CALM1, CALM2, CALM3, CAMK2B, CAPG, CAPZB, CCDC115, CCDC6, CD2AP, CDK5, …
GO:0022607	cellular component assembly	GO_BiologicalProcess-EBI-UniProt-GOA_17.02.2020_00h00	1.63033e-26	3.23295e-23	7.15276e-37	3.43332e-35	[3]	Group31	8.73684	249	[ABRAXAS2, ACAT1, ACAT2, ACSL3, ACTB, ACTC1, ACTG1, ACTN4, ADD1, ADRM1, AFDN, AFG3L2, AGFG1, AIMP2, ANK3, AP3B1, APPL2, ARF6, ARFIP2, ARRB1, ATL2, ATP5F1D, ATP6V1D, ATP6V1H, BAIAP2, BIN1, BOLA2, BOLA2B, CACYBP, CALM2, CALM3, CAND1, CAPG, CAPZB, CCDC115, CCT2, CCT3, CD2AP, CD2BP2, CD9, CDH17, CDK5, CELF1, CENPV, CETN2, CFL2, CHMP1A, CHMP2A, CHMP4A, CHMP4B, CHMP5, CHORDC1, CHTOP, CLDN1, COASY, COPS…
GO:0022613	ribonucleoprotein complex biogenesis	GO_BiologicalProcess-EBI-UniProt-GOA_17.02.2020_00h00	5.93969e-14	1.15349e-10	7.15276e-37	3.43332e-35	[3]	Group31	12.5954	66	[ALPP, CD2BP2, CEBPZ, CELF1, CUL4B, DDX10, DDX18, DDX21, DDX23, DDX27, DDX39B, DDX47, EBNA1BP2, EIF2B1, EIF2S2, EIF3A, EIF3E, EIF3H, EIF3J, EIF3M, EIF5, EXOSC10, EXOSC6, FBL, HGS, HSP90AA1, HSP90AB1, IGF2BP3, MPHOSPH10, MPP6, MRPL11, MTREX, NOP56, NOP58, NPM1, NUP88, PCMT1, PES1, PRPF31, RAN, RPF2, RPL11, RPL12, RPL23A, RPL5, RPL6, RPS14, RPS2, RPS27, RPS27L, RPS4X, RPS5, RPS6, RPS7, RRP8, RUVBL1…
GO:0043933	protein-containing complex subunit organization	GO_BiologicalProcess-EBI-UniProt-GOA_17.02.2020_00h00	1.04352e-27	2.07556e-24	7.15276e-37	3.43332e-35	[3]	Group31	10.1147	194	[ACAT1, ACAT2, ACSL3, ADRM1, AFDN, AFG3L2, AGFG1, AIMP2, AIP, APPL2, ARRB1, ATL2, ATP5F1D, BIN1, CALM2, CALM3, CAND1, CAPG, CCDC115, CCT2, CCT3, CD2AP, CD2BP2, CELF1, CENPV, CETN2, CFL2, CHMP1A, CHMP2A, CHMP4A, CHMP4B, CHMP5, CHORDC1, CLDN1, COPS7A, COPS7B, COPS8, CORO7, CORO7-PAM16, CSNK1A1, CTNNB1, CTTN, CUL4B, DDX23, DDX39B, ECSIT, EHD1, EHD4, EIF2B1, EIF2S2, EIF3A, EIF3E, EIF3H, EIF3J, EIF3M,…
GO:0065003	protein-containing complex assembly	GO_BiologicalProcess-EBI-UniProt-GOA_17.02.2020_00h00	4.09616e-25	8.10629e-22	7.15276e-37	3.43332e-35	[4]	Group31	10.3343	170	[ACAT1, ACAT2, ACSL3, ADRM1, AFDN, AFG3L2, AGFG1, AIMP2, APPL2, ARRB1, ATL2, ATP5F1D, BIN1, CALM2, CALM3, CAND1, CAPG, CCDC115, CCT2, CCT3, CD2AP, CD2BP2, CELF1, CENPV, CETN2, CHMP2A, CHMP4A, CHMP4B, CHORDC1, CLDN1, COPS7A, COPS7B, COPS8, CORO7, CORO7-PAM16, CSNK1A1, CTNNB1, CTTN, CUL4B, DDX23, DDX39B, ECSIT, EHD1, EHD4, EIF2B1, EIF2S2, EIF3A, EIF3E, EIF3H, EIF3J, EIF3M, EIF4B, EIF4E, EIF5, FARSB…
GO:0071826	ribonucleoprotein complex subunit organization	GO_BiologicalProcess-EBI-UniProt-GOA_17.02.2020_00h00	1.63801e-10	3.10566e-07	7.15276e-37	3.43332e-35	[4]	Group31	14.7287	38	[CD2BP2, CELF1, DDX23, DDX39B, EIF2B1, EIF2S2, EIF3A, EIF3E, EIF3H, EIF3J, EIF3M, EIF5, HGS, HSP90AA1, HSP90AB1, KIF5B, MRPL11, PCMT1, PRPF31, RPF2, RPL11, RPL12, RPL23A, RPL5, RPL6, RPS14, RPS27, RPS27L, RPS5, RUVBL1, RUVBL2, SF1, SLC16A1, SNRPC, SRSF10, SRSF5, STMN1, USP39]
GO:0022618	ribonucleoprotein complex assembly	GO_BiologicalProcess-EBI-UniProt-GOA_17.02.2020_00h00	2.78683e-10	5.26153e-07	7.15276e-37	3.43332e-35	[4, 5, 6]	Group31	14.741	37	[CD2BP2, CELF1, DDX23, DDX39B, EIF2B1, EIF2S2, EIF3A, EIF3E, EIF3H, EIF3J, EIF3M, EIF5, HGS, HSP90AA1, HSP90AB1, MRPL11, PCMT1, PRPF31, RPF2, RPL11, RPL12, RPL23A, RPL5, RPL6, RPS14, RPS27, RPS27L, RPS5, RUVBL1, RUVBL2, SF1, SLC16A1, SNRPC, SRSF10, SRSF5, STMN1, USP39]
GO:0034622	cellular protein-containing complex assembly	GO_BiologicalProcess-EBI-UniProt-GOA_17.02.2020_00h00	6.80727e-14	1.32129e-10	7.15276e-37	3.43332e-35	[5]	Group31	10.0298	101	[ADRM1, ATP5F1D, BIN1, CALM2, CALM3, CCDC115, CCT2, CD2BP2, CELF1, CENPV, CETN2, CHMP2A, CHMP4A, CHMP4B, COPS7A, COPS7B, COPS8, CORO7, CORO7-PAM16, CTTN, CUL4B, DDX23, DDX39B, ECSIT, EIF2B1, EIF2S2, EIF3A, EIF3E, EIF3H, EIF3J, EIF3M, EIF4B, EIF5, FCHO2, GAMT, H1-10, H1-2, H1-3, H1-4, HGS, HP1BP3, HSP90AA1, HSP90AB1, HSPD1, LLGL2, LONP1, MAPRE1, MPP7, MRPL11, NDUFA6, NDUFA8, NDUFA9, NDUFAF2, NDUFA…
GO:0051341	regulation of oxidoreductase activity	GO_BiologicalProcess-EBI-UniProt-GOA_17.02.2020_00h00	3.73777e-06	0.0065112	1.45899e-10	4.08517e-09	[4]	Group32	14.1892	21	[ATP2B4, CALM1, CALM2, CALM3, CCS, DNM2, ECSIT, EGFR, HSP90AA1, MTTP, OXA1L, PAPSS2, PDP1, PHB2, PICALM, PSMD8, SIRT3, SIRT5, TCOF1, VDAC2, WASL]
GO:0030235	nitric-oxide synthase regulator activity	GO_BiologicalProcess-EBI-UniProt-GOA_17.02.2020_00h00	2.60383e-07	0.000470512	1.45899e-10	4.08517e-09	[5]	Group32	58.3333	7	[ATP2B4, CALM1, CALM2, CALM3, EGFR, HSP90AA1, HSP90AB1]
GO:0010856	adenylate cyclase activator activity	GO_BiologicalProcess-EBI-UniProt-GOA_17.02.2020_00h00	6.46985e-06	0.0111928	1.45899e-10	4.08517e-09	[6]	Group32	50	6	[CALM1, CALM2, CALM3, CAMK2B, GNAS, PICALM]
GO:0051343	positive regulation of cyclic-nucleotide phosphodiesterase activity	GO_BiologicalProcess-EBI-UniProt-GOA_17.02.2020_00h00	2.11343e-05	0.0356958	1.45899e-10	4.08517e-09	[6]	Group32	55.5556	5	[CALM1, CALM2, CALM3, CAMK2B, PICALM]
GO:0070585	protein localization to mitochondrion	GO_BiologicalProcess-EBI-UniProt-GOA_17.02.2020_00h00	1.00661e-06	0.00179176	1.45899e-10	4.08517e-09	[6]	Group32	17.3077	18	[AIP, BAX, CALM1, CALM2, CALM3, GRPEL1, HSP90AA1, HSPD1, MTCH2, OXA1L, SAMM50, SLC25A6, TIMM44, TIMM50, TNPO1, TOMM20, TOMM22, TOMM40]
GO:0072655	establishment of protein localization to mitochondrion	GO_BiologicalProcess-EBI-UniProt-GOA_17.02.2020_00h00	6.57083e-07	0.00117684	1.45899e-10	4.08517e-09	[5, 6, 7]	Group32	18.6813	17	[AIP, BAX, CALM1, CALM2, CALM3, GRPEL1, HSP90AA1, HSPD1, OXA1L, SAMM50, SLC25A6, TIMM44, TIMM50, TNPO1, TOMM20, TOMM22, TOMM40]
GO:0090151	establishment of protein localization to mitochondrial membrane	GO_BiologicalProcess-EBI-UniProt-GOA_17.02.2020_00h00	2.66279e-05	0.044575	1.45899e-10	4.08517e-09	[5, 6, 7, 8]	Group32	33.3333	7	[CALM1, CALM2, CALM3, HSP90AA1, OXA1L, SAMM50, TOMM22]
GO:0060316	positive regulation of ryanodine-sensitive calcium-release channel activity	GO_BiologicalProcess-EBI-UniProt-GOA_17.02.2020_00h00	1.1551e-05	0.019729	1.45899e-10	4.08517e-09	[6, 7, 8, 9, 10, 11, 12, 14]	Group32	46.1538	6	[CALM1, CALM2, CALM3, CAMK2B, GSTO1, PICALM]
GO:0051648	vesicle localization	GO_BiologicalProcess-EBI-UniProt-GOA_17.02.2020_00h00	6.69137e-08	0.000122385	3.70714e-09	9.26784e-08	[4]	Group33	12.9412	33	[ACTN4, AP3B1, AP3S1, ARFGAP3, CALM2, CALM3, CDK5, CTNNB1, DCTN2, DNM2, DPYSL2, FOLR1, KIF5B, LIN7A, LMAN1, MYO1A, MYO1C, PDCD6, PICALM, PSEN1, RAB1B, SCFD1, SEC23IP, SEC24A, SEC24C, SLC25A4, SNAP23, SNAPIN, STX5, TFG, TMED9, USO1, WASL]
GO:0051650	establishment of vesicle localization	GO_BiologicalProcess-EBI-UniProt-GOA_17.02.2020_00h00	7.72142e-08	0.000141148	3.70714e-09	9.26784e-08	[4, 5]	Group33	13.1148	32	[ACTN4, AP3B1, AP3S1, ARFGAP3, CALM2, CALM3, CDK5, CTNNB1, DCTN2, DNM2, DPYSL2, FOLR1, KIF5B, LIN7A, LMAN1, MYO1C, PDCD6, PICALM, PSEN1, RAB1B, SCFD1, SEC23IP, SEC24A, SEC24C, SLC25A4, SNAP23, SNAPIN, STX5, TFG, TMED9, USO1, WASL]
GO:0048489	synaptic vesicle transport	GO_BiologicalProcess-EBI-UniProt-GOA_17.02.2020_00h00	4.11998e-07	0.000743244	3.70714e-09	9.26784e-08	[4, 5, 6]	Group33	27.2727	12	[AP3B1, AP3S1, CALM2, CALM3, CDK5, CTNNB1, DNM2, DPYSL2, KIF5B, LIN7A, PICALM, SNAPIN]
GO:0097479	synaptic vesicle localization	GO_BiologicalProcess-EBI-UniProt-GOA_17.02.2020_00h00	1.84233e-06	0.00324618	3.70714e-09	9.26784e-08	[5]	Group33	24	12	[AP3B1, AP3S1, CALM2, CALM3, CDK5, CTNNB1, DNM2, DPYSL2, KIF5B, LIN7A, PICALM, SNAPIN]
GO:0099003	vesicle-mediated transport in synapse	GO_BiologicalProcess-EBI-UniProt-GOA_17.02.2020_00h00	5.10347e-06	0.00886473	3.70714e-09	9.26784e-08	[5]	Group33	13.4969	22	[ACTB, ACTG1, ACTL8, AP3B1, ARF6, CALM2, CALM3, CANX, CDK5, CTNNB1, DNM2, FCHO2, PICALM, PSEN1, RAB8A, SH3GL1, SNAP23, SNAPIN, STX3, STX4, USP39, VAT1]
GO:0036465	synaptic vesicle recycling	GO_BiologicalProcess-EBI-UniProt-GOA_17.02.2020_00h00	1.22334e-05	0.0208579	3.70714e-09	9.26784e-08	[4, 7]	Group33	18.8406	13	[ACTB, ACTG1, ACTL8, AP3B1, ARF6, CALM2, CALM3, CANX, CDK5, DNM2, FCHO2, PICALM, SH3GL1]
GO:0099504	synaptic vesicle cycle	GO_BiologicalProcess-EBI-UniProt-GOA_17.02.2020_00h00	3.73777e-06	0.0065112	3.70714e-09	9.26784e-08	[6]	Group33	14.1892	21	[ACTB, ACTG1, ACTL8, AP3B1, ARF6, CALM2, CALM3, CANX, CDK5, CTNNB1, DNM2, FCHO2, PICALM, PSEN1, SH3GL1, SNAP23, SNAPIN, STX3, STX4, USP39, VAT1]
GO:0140238	presynaptic endocytosis	GO_BiologicalProcess-EBI-UniProt-GOA_17.02.2020_00h00	1.66592e-05	0.0283039	3.70714e-09	9.26784e-08	[6]	Group33	19.6721	12	[ACTB, ACTG1, ACTL8, ARF6, CALM2, CALM3, CANX, CDK5, DNM2, FCHO2, PICALM, SH3GL1]
GO:0048488	synaptic vesicle endocytosis	GO_BiologicalProcess-EBI-UniProt-GOA_17.02.2020_00h00	1.66592e-05	0.0283039	3.70714e-09	9.26784e-08	[5, 7, 8]	Group33	19.6721	12	[ACTB, ACTG1, ACTL8, ARF6, CALM2, CALM3, CANX, CDK5, DNM2, FCHO2, PICALM, SH3GL1]
GO:0022613	ribonucleoprotein complex biogenesis	GO_BiologicalProcess-EBI-UniProt-GOA_17.02.2020_00h00	5.93969e-14	1.15349e-10	3.23722e-27	1.42438e-25	[3]	Group34	12.5954	66	[ALPP, CD2BP2, CEBPZ, CELF1, CUL4B, DDX10, DDX18, DDX21, DDX23, DDX27, DDX39B, DDX47, EBNA1BP2, EIF2B1, EIF2S2, EIF3A, EIF3E, EIF3H, EIF3J, EIF3M, EIF5, EXOSC10, EXOSC6, FBL, HGS, HSP90AA1, HSP90AB1, IGF2BP3, MPHOSPH10, MPP6, MRPL11, MTREX, NOP56, NOP58, NPM1, NUP88, PCMT1, PES1, PRPF31, RAN, RPF2, RPL11, RPL12, RPL23A, RPL5, RPL6, RPS14, RPS2, RPS27, RPS27L, RPS4X, RPS5, RPS6, RPS7, RRP8, RUVBL1…
GO:0042254	ribosome biogenesis	GO_BiologicalProcess-EBI-UniProt-GOA_17.02.2020_00h00	2.46404e-08	4.54369e-05	3.23722e-27	1.42438e-25	[4]	Group34	11.8156	41	[ALPP, CEBPZ, CUL4B, DDX10, DDX18, DDX21, DDX27, DDX47, EBNA1BP2, EIF3A, EXOSC10, EXOSC6, FBL, IGF2BP3, MPHOSPH10, MPP6, MRPL11, MTREX, NOP56, NOP58, NPM1, NUP88, PES1, RAN, RPF2, RPL11, RPL12, RPL23A, RPL5, RPL6, RPS14, RPS2, RPS27, RPS27L, RPS4X, RPS5, RPS6, RPS7, RRP8, THUMPD1, WBP11]
GO:0071826	ribonucleoprotein complex subunit organization	GO_BiologicalProcess-EBI-UniProt-GOA_17.02.2020_00h00	1.63801e-10	3.10566e-07	3.23722e-27	1.42438e-25	[4]	Group34	14.7287	38	[CD2BP2, CELF1, DDX23, DDX39B, EIF2B1, EIF2S2, EIF3A, EIF3E, EIF3H, EIF3J, EIF3M, EIF5, HGS, HSP90AA1, HSP90AB1, KIF5B, MRPL11, PCMT1, PRPF31, RPF2, RPL11, RPL12, RPL23A, RPL5, RPL6, RPS14, RPS27, RPS27L, RPS5, RUVBL1, RUVBL2, SF1, SLC16A1, SNRPC, SRSF10, SRSF5, STMN1, USP39]
GO:0022618	ribonucleoprotein complex assembly	GO_BiologicalProcess-EBI-UniProt-GOA_17.02.2020_00h00	2.78683e-10	5.26153e-07	3.23722e-27	1.42438e-25	[4, 5, 6]	Group34	14.741	37	[CD2BP2, CELF1, DDX23, DDX39B, EIF2B1, EIF2S2, EIF3A, EIF3E, EIF3H, EIF3J, EIF3M, EIF5, HGS, HSP90AA1, HSP90AB1, MRPL11, PCMT1, PRPF31, RPF2, RPL11, RPL12, RPL23A, RPL5, RPL6, RPS14, RPS27, RPS27L, RPS5, RUVBL1, RUVBL2, SF1, SLC16A1, SNRPC, SRSF10, SRSF5, STMN1, USP39]
GO:0034622	cellular protein-containing complex assembly	GO_BiologicalProcess-EBI-UniProt-GOA_17.02.2020_00h00	6.80727e-14	1.32129e-10	3.23722e-27	1.42438e-25	[5]	Group34	10.0298	101	[ADRM1, ATP5F1D, BIN1, CALM2, CALM3, CCDC115, CCT2, CD2BP2, CELF1, CENPV, CETN2, CHMP2A, CHMP4A, CHMP4B, COPS7A, COPS7B, COPS8, CORO7, CORO7-PAM16, CTTN, CUL4B, DDX23, DDX39B, ECSIT, EIF2B1, EIF2S2, EIF3A, EIF3E, EIF3H, EIF3J, EIF3M, EIF4B, EIF5, FCHO2, GAMT, H1-10, H1-2, H1-3, H1-4, HGS, HP1BP3, HSP90AA1, HSP90AB1, HSPD1, LLGL2, LONP1, MAPRE1, MPP7, MRPL11, NDUFA6, NDUFA8, NDUFA9, NDUFAF2, NDUFA…
GO:0016070	RNA metabolic process	GO_BiologicalProcess-EBI-UniProt-GOA_17.02.2020_00h00	7.36142e-16	1.43916e-12	3.23722e-27	1.42438e-25	[5, 6]	Group34	8.37367	173	[ACIN1, ADRM1, AIMP2, AIP, AKAP8L, ALPP, ARRB1, BAX, BCAS2, BTF3, CAST, CD2BP2, CEBPZ, CELF1, CHTOP, CSTF3, CXADR, DARS2, DDX10, DDX18, DDX21, DDX23, DDX27, DDX39B, DDX42, DDX47, DDX5, DEK, DPEP1, EBNA1BP2, EDC4, EEF1E1, EIF3A, EIF3E, EIF4A2, EIF4E, ETF1, EXOSC10, EXOSC6, FAM98B, FARSB, FBL, FEN1, FMR1, FUBP3, FUS, GPRC5A, GTF2F1, HGS, HNRNPM, HNRNPU, HSP90B1, IARS2, IGF2BP3, IK, KDM1A, KHDRBS1, …
GO:0006396	RNA processing	GO_BiologicalProcess-EBI-UniProt-GOA_17.02.2020_00h00	1.50726e-15	2.94217e-12	3.23722e-27	1.42438e-25	[5, 6, 7]	Group34	10.2467	108	[ACIN1, AIP, AKAP8L, ALPP, BCAS2, CD2BP2, CELF1, CHTOP, CSTF3, DDX10, DDX18, DDX21, DDX23, DDX27, DDX39B, DDX42, DDX47, DDX5, EBNA1BP2, EIF3A, ETF1, EXOSC10, EXOSC6, FAM98B, FBL, FMR1, FUS, GTF2F1, HGS, HNRNPM, HNRNPU, HSP90B1, IGF2BP3, IK, KDM1A, KHDRBS1, KHSRP, LGALS3, MARCKSL1, MBNL1, MPHOSPH10, MPP6, MTREX, NONO, NOP56, NOP58, NSUN2, PCBP1, PCBP2, PCMT1, PDAP1, PES1, PNN, PPP2R1A, PPP4R2, PRK…
GO:0034660	ncRNA metabolic process	GO_BiologicalProcess-EBI-UniProt-GOA_17.02.2020_00h00	1.17429e-08	2.17479e-05	3.23722e-27	1.42438e-25	[6, 7]	Group34	10.3512	56	[AIMP2, ALPP, DARS2, DDX10, DDX18, DDX21, DDX27, DDX47, EBNA1BP2, EEF1E1, EIF3A, EXOSC10, EXOSC6, FAM98B, FARSB, FBL, HGS, IARS2, IGF2BP3, KHSRP, MARS1, MPHOSPH10, MPP6, MTREX, NARS1, NOP56, NOP58, NSUN2, PES1, PPA2, PRKRA, RAN, RARS1, RPF2, RPL11, RPL12, RPL5, RPS14, RPS2, RPS27, RPS4X, RPS6, RPS7, RRP8, RTRAF, SRSF5, THUMPD1, TP53RK, TRMT10C, TRMT11, TRMT61A, USP14, WARS2, WBP11, YARS2, ZCCHC8]
GO:0006364	rRNA processing	GO_BiologicalProcess-EBI-UniProt-GOA_17.02.2020_00h00	5.18337e-07	0.000932488	3.23722e-27	1.42438e-25	[5, 7, 8, 9]	Group34	12.3016	31	[ALPP, DDX10, DDX18, DDX21, DDX27, DDX47, EBNA1BP2, EIF3A, EXOSC10, EXOSC6, FBL, IGF2BP3, MPHOSPH10, MPP6, MTREX, NOP56, NOP58, PES1, RPF2, RPL11, RPL12, RPL5, RPS14, RPS2, RPS27, RPS4X, RPS6, RPS7, RRP8, THUMPD1, WBP11]
GO:0016072	rRNA metabolic process	GO_BiologicalProcess-EBI-UniProt-GOA_17.02.2020_00h00	1.5455e-06	0.0027309	3.23722e-27	1.42438e-25	[7, 8]	Group34	11.6981	31	[ALPP, DDX10, DDX18, DDX21, DDX27, DDX47, EBNA1BP2, EIF3A, EXOSC10, EXOSC6, FBL, IGF2BP3, MPHOSPH10, MPP6, MTREX, NOP56, NOP58, PES1, RPF2, RPL11, RPL12, RPL5, RPS14, RPS2, RPS27, RPS4X, RPS6, RPS7, RRP8, THUMPD1, WBP11]
GO:0006082	organic acid metabolic process	GO_BiologicalProcess-EBI-UniProt-GOA_17.02.2020_00h00	1.90149e-11	3.63755e-08	1.90149e-11	6.08477e-10	[3]	Group35	8.8141	110	[AASS, ABHD14B, ACAA1, ACAD10, ACAT1, ACAT2, ACBD5, ACSL3, ACSL5, AGMAT, AIMP2, ALDH18A1, ALDH6A1, ALDOC, ALPP, ASS1, ATP6V1B2, BCKDHA, BPNT1, BSG, CHORDC1, CKB, CNPY2, COASY, CPS1, CRYL1, CYP2S1, DARS2, DBT, DDX27, DEGS1, DGLUCY, DLAT, DPEP1, ECHDC1, ECI2, EEF1E1, ENO1, ETFA, FARSB, FLOT1, FOLR1, GALK1, GAMT, GCDH, GFER, GFPT1, GLS, GMPS, GNPAT, GOT1, GSTO1, HADHA, HADHB, HGS, HSD17B12, HSD17B4,…
GO:0043436	oxoacid metabolic process	GO_BiologicalProcess-EBI-UniProt-GOA_17.02.2020_00h00	3.63462e-12	6.99302e-09	1.90149e-11	6.08477e-10	[4]	Group35	9.04605	110	[AASS, ABHD14B, ACAA1, ACAD10, ACAT1, ACAT2, ACBD5, ACSL3, ACSL5, AGMAT, AIMP2, ALDH18A1, ALDH6A1, ALDOC, ALPP, ASS1, ATP6V1B2, BCKDHA, BPNT1, BSG, CHORDC1, CKB, CNPY2, COASY, CPS1, CRYL1, CYP2S1, DARS2, DBT, DDX27, DEGS1, DGLUCY, DLAT, DPEP1, ECHDC1, ECI2, EEF1E1, ENO1, ETFA, FARSB, FLOT1, FOLR1, GALK1, GAMT, GCDH, GFER, GFPT1, GLS, GMPS, GNPAT, GOT1, GSTO1, HADHA, HADHB, HGS, HSD17B12, HSD17B4,…
GO:0006520	cellular amino acid metabolic process	GO_BiologicalProcess-EBI-UniProt-GOA_17.02.2020_00h00	5.59851e-09	1.04132e-05	1.90149e-11	6.08477e-10	[3, 4, 6]	Group35	11.7801	45	[AASS, ACAT1, AGMAT, AIMP2, ALDH18A1, ALDH6A1, ALPP, ASS1, BCKDHA, CNPY2, COASY, CPS1, DARS2, DBT, DGLUCY, DPEP1, EEF1E1, FARSB, GCDH, GFPT1, GLS, GMPS, GOT1, HGS, IARS2, MARS1, MCCC2, MECP2, MTHFD1, NARS1, PEPD, PHGDH, PLOD3, PPA2, PRODH, PSPH, PYCR1, RARS1, SEPHS1, SEPHS2, SPAG9, SRM, SRSF5, WARS2, YARS2]
GO:0019752	carboxylic acid metabolic process	GO_BiologicalProcess-EBI-UniProt-GOA_17.02.2020_00h00	3.77322e-12	7.25214e-09	1.90149e-11	6.08477e-10	[5]	Group35	9.27093	103	[AASS, ACAA1, ACAD10, ACAT1, ACAT2, ACBD5, ACSL3, ACSL5, AGMAT, AIMP2, ALDH18A1, ALDH6A1, ALDOC, ALPP, ASS1, ATP6V1B2, BCKDHA, BSG, CHORDC1, CKB, CNPY2, COASY, CPS1, CRYL1, CYP2S1, DARS2, DBT, DDX27, DEGS1, DGLUCY, DLAT, DPEP1, ECHDC1, ECI2, EEF1E1, ENO1, ETFA, FARSB, FLOT1, FOLR1, GALK1, GAMT, GCDH, GFER, GFPT1, GLS, GMPS, GNPAT, GOT1, GSTO1, HADHA, HADHB, HGS, HSD17B12, HSD17B4, HSD17B8, HYI, I…
GO:0043038	amino acid activation	GO_BiologicalProcess-EBI-UniProt-GOA_17.02.2020_00h00	7.34471e-06	0.0126696	1.90149e-11	6.08477e-10	[4, 5, 7]	Group35	19.697	13	[AIMP2, DARS2, EEF1E1, FARSB, HGS, IARS2, MARS1, NARS1, PPA2, RARS1, SRSF5, WARS2, YARS2]
GO:1901605	alpha-amino acid metabolic process	GO_BiologicalProcess-EBI-UniProt-GOA_17.02.2020_00h00	2.42959e-05	0.0408415	1.90149e-11	6.08477e-10	[4, 5, 7]	Group35	10.6227	29	[AASS, ACAT1, AGMAT, ALDH18A1, ALDH6A1, ALPP, ASS1, CNPY2, COASY, CPS1, DGLUCY, DPEP1, GCDH, GFPT1, GLS, GMPS, GOT1, MCCC2, MECP2, MTHFD1, PHGDH, PLOD3, PRODH, PSPH, PYCR1, SEPHS1, SEPHS2, SPAG9, SRM]
GO:0009064	glutamine family amino acid metabolic process	GO_BiologicalProcess-EBI-UniProt-GOA_17.02.2020_00h00	1.66363e-05	0.0282817	1.90149e-11	6.08477e-10	[5, 6, 8]	Group35	15.534	16	[AGMAT, ALDH18A1, ALPP, ASS1, COASY, CPS1, DGLUCY, GFPT1, GLS, GMPS, GOT1, MECP2, PHGDH, PRODH, PYCR1, SPAG9]
GO:1901607	alpha-amino acid biosynthetic process	GO_BiologicalProcess-EBI-UniProt-GOA_17.02.2020_00h00	5.32564e-06	0.00923466	1.90149e-11	6.08477e-10	[5, 6, 7, 8]	Group35	17.8571	15	[AASS, ALDH18A1, ASS1, CNPY2, CPS1, GLS, GOT1, MTHFD1, PHGDH, PLOD3, PSPH, PYCR1, SEPHS1, SEPHS2, SRM]
GO:0043039	tRNA aminoacylation	GO_BiologicalProcess-EBI-UniProt-GOA_17.02.2020_00h00	5.1337e-06	0.0089121	1.90149e-11	6.08477e-10	[5, 6, 8, 9]	Group35	20.3125	13	[AIMP2, DARS2, EEF1E1, FARSB, HGS, IARS2, MARS1, NARS1, PPA2, RARS1, SRSF5, WARS2, YARS2]
GO:0006418	tRNA aminoacylation for protein translation	GO_BiologicalProcess-EBI-UniProt-GOA_17.02.2020_00h00	2.91232e-06	0.00510821	1.90149e-11	6.08477e-10	[6, 7, 8, 9, 10]	Group35	21.3115	13	[AIMP2, DARS2, EEF1E1, FARSB, HGS, IARS2, MARS1, NARS1, PPA2, RARS1, SRSF5, WARS2, YARS2]
GO:0006839	mitochondrial transport	GO_BiologicalProcess-EBI-UniProt-GOA_17.02.2020_00h00	1.94795e-11	3.72254e-08	2.40066e-20	9.8427e-19	[4]	Group36	14.6853	42	[ABCB10, AFG3L2, AIP, ATP5F1A, ATP5F1B, ATP5F1C, ATP5F1D, ATP5PB, ATP5PD, ATP5PO, BAX, COX5B, CXADR, GRPEL1, HSP90AA1, HSPD1, LETM1, OPA1, OXA1L, PRKAA1, PSEN1, SAMM50, SF1, SFN, SFXN1, SFXN3, SLC25A1, SLC25A10, SLC25A13, SLC25A15, SLC25A22, SLC25A24, SLC25A5, SLC25A6, STOML2, TIMM44, TIMM50, TNPO1, TOMM20, TOMM22, TOMM40, YWHAG]
GO:0007005	mitochondrion organization	GO_BiologicalProcess-EBI-UniProt-GOA_17.02.2020_00h00	1.16831e-14	2.27237e-11	2.40066e-20	9.8427e-19	[4]	Group36	12.782	68	[AFG3L2, AIP, ATAD3A, ATP5F1A, ATP5F1B, ATP5F1C, ATP5F1D, ATP5PB, ATP5PD, ATP5PO, BAX, CALM1, CALM2, CALM3, CDK5, CHCHD2, CHCHD2P9, CHCHD3, CXADR, DNAJA3, DNAJC11, DNM2, ECSIT, GRPEL1, HSP90AA1, HSPD1, IMMT, LETM1, LONP1, MAN2A1, MICOS13, NDUFA6, NDUFA8, NDUFA9, NDUFAF2, NDUFAF7, OPA1, OXA1L, PHB, PHB2, POLDIP2, SAMM50, SCO1, SDHAF2, SF1, SFN, SIRT3, SIRT5, SLC25A4, SLC25A5, SLC25A6, SOD2, SQSTM1…
GO:0007006	mitochondrial membrane organization	GO_BiologicalProcess-EBI-UniProt-GOA_17.02.2020_00h00	4.26654e-10	8.04242e-07	2.40066e-20	9.8427e-19	[4, 5]	Group36	17.4699	29	[AFG3L2, ATP5F1A, ATP5F1B, ATP5F1C, ATP5F1D, ATP5PB, ATP5PD, ATP5PO, BAX, CALM1, CALM2, CALM3, CHCHD3, CXADR, DNAJC11, HSP90AA1, IMMT, LETM1, MICOS13, OPA1, OXA1L, SAMM50, SF1, SFN, SLC25A5, TIMM50, TOMM20, TOMM22, YWHAG]
GO:1990542	mitochondrial transmembrane transport	GO_BiologicalProcess-EBI-UniProt-GOA_17.02.2020_00h00	5.41763e-11	1.03152e-07	2.40066e-20	9.8427e-19	[5]	Group36	21.7391	25	[AFG3L2, ATP5F1A, ATP5F1B, ATP5F1C, ATP5F1D, ATP5PB, ATP5PD, ATP5PO, COX5B, GRPEL1, HSPD1, LETM1, OPA1, PRKAA1, SFXN1, SFXN3, SLC25A1, SLC25A13, SLC25A15, SLC25A22, STOML2, TIMM44, TIMM50, TOMM20, TOMM40]
GO:0007007	inner mitochondrial membrane organization	GO_BiologicalProcess-EBI-UniProt-GOA_17.02.2020_00h00	3.51401e-10	6.63094e-07	2.40066e-20	9.8427e-19	[5, 6]	Group36	32	16	[AFG3L2, ATP5F1A, ATP5F1B, ATP5F1C, ATP5F1D, ATP5PB, ATP5PD, ATP5PO, CHCHD3, DNAJC11, IMMT, LETM1, MICOS13, OPA1, OXA1L, SAMM50]
GO:0070585	protein localization to mitochondrion	GO_BiologicalProcess-EBI-UniProt-GOA_17.02.2020_00h00	1.00661e-06	0.00179176	2.40066e-20	9.8427e-19	[6]	Group36	17.3077	18	[AIP, BAX, CALM1, CALM2, CALM3, GRPEL1, HSP90AA1, HSPD1, MTCH2, OXA1L, SAMM50, SLC25A6, TIMM44, TIMM50, TNPO1, TOMM20, TOMM22, TOMM40]
GO:0072655	establishment of protein localization to mitochondrion	GO_BiologicalProcess-EBI-UniProt-GOA_17.02.2020_00h00	6.57083e-07	0.00117684	2.40066e-20	9.8427e-19	[5, 6, 7]	Group36	18.6813	17	[AIP, BAX, CALM1, CALM2, CALM3, GRPEL1, HSP90AA1, HSPD1, OXA1L, SAMM50, SLC25A6, TIMM44, TIMM50, TNPO1, TOMM20, TOMM22, TOMM40]
GO:0017038	protein import	GO_BiologicalProcess-EBI-UniProt-GOA_17.02.2020_00h00	9.43569e-09	1.75032e-05	2.40066e-20	9.8427e-19	[5, 6, 7, 8]	Group36	15.3439	29	[AGFG1, APPL1, APPL2, CTNND1, GRPEL1, HSP90AA1, HSPD1, IPO9, KPNB1, LMNA, LONP1, NUP107, NUP155, NUP50, NUP62, NUP85, NUP88, NUP98, PEX14, PHB2, RAN, RPL17, SAMM50, TIMM44, TIMM50, TNPO1, TOMM20, TOMM22, TOMM40]
GO:0042407	cristae formation	GO_BiologicalProcess-EBI-UniProt-GOA_17.02.2020_00h00	9.05184e-11	1.72075e-07	2.40066e-20	9.8427e-19	[6, 7]	Group36	41.1765	14	[AFG3L2, ATP5F1A, ATP5F1B, ATP5F1C, ATP5F1D, ATP5PB, ATP5PD, ATP5PO, CHCHD3, DNAJC11, IMMT, LETM1, MICOS13, SAMM50]
GO:0090151	establishment of protein localization to mitochondrial membrane	GO_BiologicalProcess-EBI-UniProt-GOA_17.02.2020_00h00	2.66279e-05	0.044575	2.40066e-20	9.8427e-19	[5, 6, 7, 8]	Group36	33.3333	7	[CALM1, CALM2, CALM3, HSP90AA1, OXA1L, SAMM50, TOMM22]
GO:0006626	protein targeting to mitochondrion	GO_BiologicalProcess-EBI-UniProt-GOA_17.02.2020_00h00	1.22334e-05	0.0208579	2.40066e-20	9.8427e-19	[5, 6, 7, 8, 9, 10]	Group36	18.8406	13	[AIP, GRPEL1, HSP90AA1, HSPD1, OXA1L, SAMM50, SLC25A6, TIMM44, TIMM50, TNPO1, TOMM20, TOMM22, TOMM40]
GO:0051640	organelle localization	GO_BiologicalProcess-EBI-UniProt-GOA_17.02.2020_00h00	1.9531e-11	3.73042e-08	2.88736e-15	1.12607e-13	[3]	Group37	10.2941	77	[ACTN4, AP3B1, AP3S1, ARFGAP3, ATP6V1H, BIN1, CALM2, CALM3, CDK5, CETN2, CHMP1A, CHMP2A, CHMP4A, CHMP4B, CHMP5, CHTOP, COASY, CTNNB1, DCTN1, DCTN2, DNM2, DPYSL2, EIF3A, ESYT1, EZR, FOLR1, GFER, HSP90AA1, KIF5B, KPNB1, LIN7A, LLGL2, LMAN1, MAPRE1, MISP, MYO1A, MYO1C, NPM1, NUP62, NUP88, NUP98, OPA1, PDCD10, PDCD6, PEX14, PICALM, PLXNA2, PPP2R1A, PRKACA, PRKCA, PSEN1, RAB10, RAB1B, RAB8A, RAN, SCFD…
GO:0051649	establishment of localization in cell	GO_BiologicalProcess-EBI-UniProt-GOA_17.02.2020_00h00	4.33706e-07	0.000781538	2.88736e-15	1.12607e-13	[3]	Group37	9.76562	50	[ACTN4, AP3B1, AP3S1, ARFGAP3, ATP2B4, CALM2, CALM3, CDK5, CHMP1A, CHMP2A, CHMP4A, CHMP4B, CHMP5, CTNNB1, DCTN1, DCTN2, DNM2, DPYSL2, EZR, FOLR1, KIF5B, KPNB1, LETM1, LIN7A, LLGL2, LMAN1, MISP, MYO1C, NUP62, PDCD10, PDCD6, PICALM, PLCB3, PLCD3, PSEN1, RAB1B, SCFD1, SEC23IP, SEC24A, SEC24C, SLC25A4, SLC9A3R1, SNAP23, SNAPIN, STX5, SUN1, TFG, TMED9, USO1, WASL]
GO:0061024	membrane organization	GO_BiologicalProcess-EBI-UniProt-GOA_17.02.2020_00h00	5.43046e-16	1.0622e-12	2.88736e-15	1.12607e-13	[3]	Group37	10.3746	108	[ACTB, ACTG1, AFG3L2, AGFG1, AKAP8L, ANK3, AP3B1, ARFGAP3, ARRB1, ATL2, ATP1B1, ATP5F1A, ATP5F1B, ATP5F1C, ATP5F1D, ATP5PB, ATP5PD, ATP5PO, BAIAP2, BAX, BIN1, CALM1, CALM2, CALM3, CD9, CHCHD3, CHMP1A, CHMP2A, CHMP4A, CHMP4B, CHMP5, CHORDC1, CTTN, CXADR, DCTN1, DEGS1, DNAJA3, DNAJC11, DNM2, EGFR, EPN1, FCHO2, FLOT1, FOLR1, GET3, GNPAT, HGS, HSP90AA1, IMMT, KALRN, LEMD2, LETM1, LMAN1, LMNA, MAPK1, …
GO:0051656	establishment of organelle localization	GO_BiologicalProcess-EBI-UniProt-GOA_17.02.2020_00h00	1.65455e-09	3.09897e-06	2.88736e-15	1.12607e-13	[3, 4]	Group37	11.2051	53	[ACTN4, AP3B1, AP3S1, ARFGAP3, CALM2, CALM3, CDK5, CHMP1A, CHMP2A, CHMP4A, CHMP4B, CHMP5, CTNNB1, DCTN1, DCTN2, DNM2, DPYSL2, EIF3A, EZR, FOLR1, KIF5B, KPNB1, LIN7A, LLGL2, LMAN1, MISP, MYO1C, NPM1, NUP62, NUP88, OPA1, PDCD10, PDCD6, PEX14, PICALM, PSEN1, RAB1B, RAN, SCFD1, SEC23IP, SEC24A, SEC24C, SLC25A4, SLC9A3R1, SNAP23, SNAPIN, SPNS1, STX5, SUN1, TFG, TMED9, USO1, WASL]
GO:0016050	vesicle organization	GO_BiologicalProcess-EBI-UniProt-GOA_17.02.2020_00h00	8.35784e-06	0.0143671	2.88736e-15	1.12607e-13	[4]	Group37	9.75	39	[AGFG1, AP3B1, ARFGAP3, CALM2, CALM3, CD2AP, CHMP1A, CHMP2A, CHMP4A, CHMP4B, CHMP5, DNM2, FOLR1, HGS, LMAN1, MYO18A, PDCD6, PDCD6IP, PICALM, RAB1B, RAB8A, SCFD1, SEC23IP, SEC24A, SEC24C, SLC25A4, SNAP23, SNAPIN, SQSTM1, SRSF5, STX3, STX4, STX5, TFG, TMED9, TSG101, USO1, VAPB, WASL]
GO:0051648	vesicle localization	GO_BiologicalProcess-EBI-UniProt-GOA_17.02.2020_00h00	6.69137e-08	0.000122385	2.88736e-15	1.12607e-13	[4]	Group37	12.9412	33	[ACTN4, AP3B1, AP3S1, ARFGAP3, CALM2, CALM3, CDK5, CTNNB1, DCTN2, DNM2, DPYSL2, FOLR1, KIF5B, LIN7A, LMAN1, MYO1A, MYO1C, PDCD6, PICALM, PSEN1, RAB1B, SCFD1, SEC23IP, SEC24A, SEC24C, SLC25A4, SNAP23, SNAPIN, STX5, TFG, TMED9, USO1, WASL]
GO:0006900	vesicle budding from membrane	GO_BiologicalProcess-EBI-UniProt-GOA_17.02.2020_00h00	1.15082e-09	2.15894e-06	2.88736e-15	1.12607e-13	[4, 5]	Group37	19.6721	24	[AP3B1, ARFGAP3, CALM2, CALM3, CHMP4A, CHMP4B, DNM2, FOLR1, LMAN1, MYO18A, PDCD6, PICALM, RAB1B, SCFD1, SEC23IP, SEC24A, SEC24C, SLC25A4, STX5, TFG, TMED9, USO1, VAPB, WASL]
GO:0051650	establishment of vesicle localization	GO_BiologicalProcess-EBI-UniProt-GOA_17.02.2020_00h00	7.72142e-08	0.000141148	2.88736e-15	1.12607e-13	[4, 5]	Group37	13.1148	32	[ACTN4, AP3B1, AP3S1, ARFGAP3, CALM2, CALM3, CDK5, CTNNB1, DCTN2, DNM2, DPYSL2, FOLR1, KIF5B, LIN7A, LMAN1, MYO1C, PDCD6, PICALM, PSEN1, RAB1B, SCFD1, SEC23IP, SEC24A, SEC24C, SLC25A4, SNAP23, SNAPIN, STX5, TFG, TMED9, USO1, WASL]
GO:0048193	Golgi vesicle transport	GO_BiologicalProcess-EBI-UniProt-GOA_17.02.2020_00h00	2.33188e-05	0.0392455	2.88736e-15	1.12607e-13	[5]	Group37	9.25508	41	[ANK3, ARFGAP3, BCAP31, CAPZB, CD55, COPB1, CORO7, CORO7-PAM16, DCTN1, DCTN2, DHRS4, DNM2, ERGIC1, FOLR1, KRT18, LMAN1, MIA2, MYO18A, NAPG, NRBP1, PDCD6, PITPNB, RAB10, RAB1B, RAB6C, RAB8A, SCAMP3, SCFD1, SEC23IP, SEC24A, SEC24C, SLC25A4, SNAP23, SNX2, SNX8, STX4, STX5, TFG, TMED9, USO1, VAPB]
GO:0048489	synaptic vesicle transport	GO_BiologicalProcess-EBI-UniProt-GOA_17.02.2020_00h00	4.11998e-07	0.000743244	2.88736e-15	1.12607e-13	[4, 5, 6]	Group37	27.2727	12	[AP3B1, AP3S1, CALM2, CALM3, CDK5, CTNNB1, DNM2, DPYSL2, KIF5B, LIN7A, PICALM, SNAPIN]
GO:0097479	synaptic vesicle localization	GO_BiologicalProcess-EBI-UniProt-GOA_17.02.2020_00h00	1.84233e-06	0.00324618	2.88736e-15	1.12607e-13	[5]	Group37	24	12	[AP3B1, AP3S1, CALM2, CALM3, CDK5, CTNNB1, DNM2, DPYSL2, KIF5B, LIN7A, PICALM, SNAPIN]
GO:0006901	vesicle coating	GO_BiologicalProcess-EBI-UniProt-GOA_17.02.2020_00h00	1.86028e-05	0.0315131	2.88736e-15	1.12607e-13	[5, 6]	Group37	17.0732	14	[ARFGAP3, FOLR1, LMAN1, PDCD6, RAB1B, SCFD1, SEC23IP, SEC24A, SEC24C, SLC25A4, STX5, TFG, TMED9, USO1]
GO:0048194	Golgi vesicle budding	GO_BiologicalProcess-EBI-UniProt-GOA_17.02.2020_00h00	5.74815e-06	0.0099558	2.88736e-15	1.12607e-13	[5, 6]	Group37	16.8421	16	[ARFGAP3, FOLR1, LMAN1, MYO18A, PDCD6, RAB1B, SCFD1, SEC23IP, SEC24A, SEC24C, SLC25A4, STX5, TFG, TMED9, USO1, VAPB]
GO:0032879	regulation of localization	GO_BiologicalProcess-EBI-UniProt-GOA_17.02.2020_00h00	6.03585e-08	0.000110456	2.02823e-08	4.86774e-07	[3]	Group38	6.36813	219	[ABHD14B, ACSL3, ACTB, ACTG1, ACTN4, AFDN, AGFG1, AGR2, AHNAK, AKAP8L, ALPP, ANK3, ANXA13, APPL1, APPL2, ARF6, ARFGAP3, ARFIP1, ARHGDIA, ARRB1, ATAD1, ATP1A1, ATP1B1, ATP1B3, ATP2B4, ATP5F1A, ATP5F1B, BAX, BCAP31, BIN1, BSG, CACYBP, CALM1, CALM2, CALM3, CAMK2B, CAMK2G, CCDC6, CCT2, CCT3, CCT4, CCT5, CCT6A, CD2AP, CD9, CDK5, CDK5RAP3, CEACAM1, CEACAM6, CHMP2A, CHORDC1, CHTOP, CLDN1, COMT, CSRP1, C…
GO:0044087	regulation of cellular component biogenesis	GO_BiologicalProcess-EBI-UniProt-GOA_17.02.2020_00h00	2.38101e-09	4.45486e-06	2.02823e-08	4.86774e-07	[3]	Group38	8.35381	102	[ACTG1, ADD1, ADNP, ARF6, ARFIP1, ARFIP2, BAIAP2, BAX, BIN1, CACYBP, CAND1, CAPG, CAPZB, CDH17, CHMP1A, CHMP2A, CHMP4A, CHMP4B, CHMP5, CLDN1, CTTN, CUL4B, DCTN1, DNAJB1, DNM2, EIF2AK2, EIF4A2, EIF4E, EPB41L5, EPS8, EPS8L3, EZR, F11R, FDPS, FLOT1, FMR1, FXR2, G3BP2, GAMT, HAX1, HGS, HNRNPU, HSP90AA1, IQGAP2, LGALS3, LLGL2, MAPK1, MAPRE1, MECP2, MMAB, MPP7, MTTP, MYO1C, NDRG1, NPM1, NUP62, OCLN, PA…
GO:0032886	regulation of microtubule-based process	GO_BiologicalProcess-EBI-UniProt-GOA_17.02.2020_00h00	7.42937e-06	0.0128082	2.02823e-08	4.86774e-07	[4]	Group38	10.5431	33	[ABHD14B, ATP6V1H, CACYBP, CHMP1A, CHMP2A, CHMP4A, CHMP4B, CHMP5, CHORDC1, COASY, CTNNB1, DCTN1, FDPS, HNRNPU, MAPRE1, MECP2, MTTP, NDRG1, NPM1, NUP62, OCLN, PAK1, PDCD6IP, PICALM, PRKAA1, RAB6C, RAC1, RANBP1, RBM14, RPS3, STAG2, STMN1, TUBB]
GO:0044089	positive regulation of cellular component biogenesis	GO_BiologicalProcess-EBI-UniProt-GOA_17.02.2020_00h00	2.0912e-06	0.0036826	2.02823e-08	4.86774e-07	[4]	Group38	8.67647	59	[ADNP, ARF6, BAIAP2, BAX, BIN1, CAND1, CDH17, CHMP2A, CLDN1, CTTN, CUL4B, DCTN1, DNM2, EIF4A2, EIF4E, EPB41L5, EPS8, EPS8L3, FDPS, FLOT1, FMR1, G3BP2, HGS, HSP90AA1, IQGAP2, LGALS3, LLGL2, MAPK1, MAPRE1, MECP2, MMAB, MPP7, MTTP, MYO1C, NDRG1, NUP62, OCLN, PAK1, PALM, PDCD6IP, PICALM, PRKACA, PRKCA, PSMC6, PTMA, PXN, RAC1, RALA, RALB, RPS3, SNX9, SRC, SRSF5, TPM1, TPM3, TSG101, VIL1, WASF2, WASL]
GO:0048522	positive regulation of cellular process	GO_BiologicalProcess-EBI-UniProt-GOA_17.02.2020_00h00	2.30424e-08	4.25133e-05	2.02823e-08	4.86774e-07	[4]	Group38	5.74981	370	[ABHD14B, ABI1, ACAT1, ACIN1, ACSL3, ACTA2, ACTG1, ACTG2, ACTN4, ADD1, ADNP, ADRM1, AGFG1, AGPAT1, AGR2, AIMP2, AIP, AKAP8L, ALPG, ALPP, ANK3, ANXA13, AP3B1, APPL1, APPL2, ARF6, ARHGDIA, ARID3A, ARMCX3, ARRB1, ASPH, ASS1, ATAD1, ATP1B1, ATP1B3, ATP2B4, ATP5F1A, ATP5F1B, BAIAP2, BAX, BCAP31, BCLAF1, BIN1, BRCC3, CACYBP, CALM1, CALM2, CALM3, CAMK2B, CAMK2G, CAND1, CAPG, CCDC6, CCT2, CCT3, CCT4, CCT…
GO:0051128	regulation of cellular component organization	GO_BiologicalProcess-EBI-UniProt-GOA_17.02.2020_00h00	2.01779e-12	3.88626e-09	2.02823e-08	4.86774e-07	[4]	Group38	7.09926	221	[ABHD14B, ACTG1, ACTN4, ADD1, ADNP, AIP, AKAP8L, ALPP, APPL1, APPL2, ARF6, ARFGAP3, ARFIP1, ARFIP2, ARHGDIA, ARRB1, ASPH, ATAD1, ATAD3A, ATP6V1H, BAIAP2, BAX, BIN1, BSG, CACYBP, CALM1, CALM2, CALM3, CAMK2B, CAMK2G, CAND1, CAPG, CAPZB, CCDC6, CCT2, CCT3, CCT4, CCT5, CCT6A, CD2AP, CDC37, CDH17, CDK11A, CDK11B, CDK5, CEACAM1, CENPV, CFL2, CHMP1A, CHMP2A, CHMP4A, CHMP4B, CHMP5, CHORDC1, CHTOP, CLDN1,…
GO:0043254	regulation of protein-containing complex assembly	GO_BiologicalProcess-EBI-UniProt-GOA_17.02.2020_00h00	9.15279e-06	0.0157062	2.02823e-08	4.86774e-07	[4, 5]	Group38	8.77193	50	[ADD1, ARF6, ARFIP1, ARFIP2, BAIAP2, BAX, BIN1, CAND1, CAPG, CAPZB, CDH17, CTTN, CUL4B, DCTN1, EIF2AK2, EIF4A2, EIF4E, EPS8, FDPS, HAX1, HSP90AA1, IQGAP2, LGALS3, LLGL2, MAPRE1, MECP2, MMAB, MPP7, MTTP, MYO1C, NDRG1, OCLN, PAK1, PDCD6IP, PRKCD, PSMC6, RAC1, RALB, RPS3, SIRT2, SNX9, SRC, SSH3, STMN1, TMOD3, TUBB, VDAC2, VIL1, WASF2, WASL]
GO:0033043	regulation of organelle organization	GO_BiologicalProcess-EBI-UniProt-GOA_17.02.2020_00h00	6.53609e-12	1.25362e-08	2.02823e-08	4.86774e-07	[5]	Group38	8.19576	139	[ABHD14B, ACTG1, ADD1, AIP, AKAP8L, ALPP, ARF6, ARFIP1, ARFIP2, ARHGDIA, ARRB1, ATP6V1H, BAIAP2, BAX, BIN1, CACYBP, CAPG, CAPZB, CCT2, CCT3, CCT4, CCT5, CCT6A, CD2AP, CDC37, CDK5, CENPV, CFL2, CHMP1A, CHMP2A, CHMP4A, CHMP4B, CHMP5, CHORDC1, CHTOP, COASY, CTNNB1, CTTN, DCTN1, DNM2, EPS8, EXOSC10, EZR, F11R, FAM162A, FDPS, FEN1, FMR1, G3BP2, GNL3, H1-10, H1-2, H1-3, H1-4, HAX1, HMGA1, HNRNPU, IK, I…
GO:0051130	positive regulation of cellular component organization	GO_BiologicalProcess-EBI-UniProt-GOA_17.02.2020_00h00	1.38421e-10	2.62724e-07	2.02823e-08	4.86774e-07	[5]	Group38	8.05031	128	[ABHD14B, ACTN4, ADD1, ADNP, AKAP8L, ALPP, APPL1, APPL2, ARF6, ARHGDIA, ARRB1, ATAD1, BAIAP2, BAX, BIN1, CALM1, CALM3, CAMK2B, CAND1, CCDC6, CCT2, CCT3, CCT4, CCT5, CCT6A, CDC37, CDH17, CDK5, CFL2, CHTOP, CLDN1, COLGALT1, CTNNB1, CTTN, CUL4B, DCTN1, DDX21, DNM2, EHD1, EIF4A2, EIF4E, EIF4G2, EPB41L5, EPS8, EPS8L3, FAM162A, FDPS, FEN1, FLOT1, FMR1, G3BP2, GAMT, GNL3, HAX1, HNRNPU, HSP90AA1, ILK, IQ…
GO:0031334	positive regulation of protein-containing complex assembly	GO_BiologicalProcess-EBI-UniProt-GOA_17.02.2020_00h00	2.19365e-05	0.036985	2.02823e-08	4.86774e-07	[5, 6]	Group38	10.061	33	[ARF6, BAIAP2, BAX, BIN1, CAND1, CDH17, CTTN, CUL4B, DCTN1, EIF4A2, EIF4E, FDPS, HSP90AA1, IQGAP2, LGALS3, LLGL2, MAPRE1, MECP2, MMAB, MPP7, MYO1C, NDRG1, OCLN, PAK1, PDCD6IP, PSMC6, RAC1, RPS3, SNX9, SRC, VIL1, WASF2, WASL]
GO:0032271	regulation of protein polymerization	GO_BiologicalProcess-EBI-UniProt-GOA_17.02.2020_00h00	4.26065e-07	0.000768196	2.02823e-08	4.86774e-07	[5, 6]	Group38	11.7647	34	[ADD1, ARF6, ARFIP1, ARFIP2, BAIAP2, BIN1, CAPG, CAPZB, CTTN, DCTN1, EPS8, FDPS, HAX1, HSP90AA1, IQGAP2, MAPRE1, MECP2, MTTP, MYO1C, NDRG1, OCLN, PAK1, PRKCD, RAC1, RPS3, SNX9, SSH3, STMN1, TMOD3, TUBB, VDAC2, VIL1, WASF2, WASL]
GO:0010638	positive regulation of organelle organization	GO_BiologicalProcess-EBI-UniProt-GOA_17.02.2020_00h00	4.42352e-08	8.12157e-05	2.02823e-08	4.86774e-07	[6]	Group38	8.82353	75	[AKAP8L, ARF6, ARRB1, BAIAP2, BAX, BIN1, CCT2, CCT3, CCT4, CCT5, CCT6A, CDC37, CDK5, CFL2, CHTOP, CTNNB1, CTTN, DCTN1, FAM162A, FDPS, FEN1, FMR1, G3BP2, GNL3, HAX1, HNRNPU, IQGAP2, KDM1A, KIF5B, LMAN1, LMNA, MAPK1, MAPK3, MAPRE1, MECP2, MMAB, MTTP, MYO1C, NDRG1, NUP62, OCLN, OPA1, PAK1, PAPSS2, PDCD6IP, PFDN2, PHB2, PICALM, PNKP, PRKAA1, PTMA, PXN, RAC1, RAD21, RALB, RANBP1, RPS3, RUVBL2, SAE1, S…
GO:0010639	negative regulation of organelle organization	GO_BiologicalProcess-EBI-UniProt-GOA_17.02.2020_00h00	7.98563e-07	0.00142544	2.02823e-08	4.86774e-07	[6]	Group38	9.51493	51	[ABHD14B, ADD1, AIP, ALPP, ATP6V1H, CACYBP, CAPG, CAPZB, CHMP2A, CHMP4A, CHMP4B, COASY, DNM2, EPS8, EXOSC10, F11R, H1-10, H1-2, H1-3, H1-4, HMGA1, HNRNPU, IK, KDM1A, LIMA1, LMAN1, LMNA, MAPRE1, NPM1, OPA1, OTUB1, PAK2, PAPSS2, PRKCD, PSMG2, RAD21, RBM14, RPS27, SCFD1, SLC25A5, SRC, SSH3, STMN1, TIGAR, TMEM245, TMOD3, TUBB, VAT1, VIL1, WASF2, XRCC1]
GO:0051493	regulation of cytoskeleton organization	GO_BiologicalProcess-EBI-UniProt-GOA_17.02.2020_00h00	4.6715e-09	8.70767e-06	2.02823e-08	4.86774e-07	[6]	Group38	9.59666	69	[ABHD14B, ACTG1, ADD1, ARF6, ARFIP1, ARFIP2, ARHGDIA, ATP6V1H, BAIAP2, BIN1, CACYBP, CAPG, CAPZB, CD2AP, CDK5, CFL2, CHMP1A, CHMP2A, CHMP4A, CHMP4B, CHMP5, CHORDC1, COASY, CTNNB1, CTTN, DCTN1, EPS8, F11R, FDPS, HAX1, HNRNPU, ILK, IQGAP2, LIMA1, MAPK1, MAPK3, MAPRE1, MECP2, MTTP, MYO1C, NDRG1, NPM1, NUP62, OCLN, PAK1, PAK2, PDCD6IP, PFDN2, PICALM, PRKAA1, PRKCD, PTMA, PXN, RAB6C, RAC1, RANBP1, RBM…
GO:0070507	regulation of microtubule cytoskeleton organization	GO_BiologicalProcess-EBI-UniProt-GOA_17.02.2020_00h00	2.60369e-07	0.000470747	2.02823e-08	4.86774e-07	[5, 7]	Group38	12.2222	33	[ABHD14B, ATP6V1H, CACYBP, CHMP1A, CHMP2A, CHMP4A, CHMP4B, CHMP5, CHORDC1, COASY, CTNNB1, DCTN1, FDPS, HNRNPU, MAPRE1, MECP2, MTTP, NDRG1, NPM1, NUP62, OCLN, PAK1, PDCD6IP, PICALM, PRKAA1, RAB6C, RAC1, RANBP1, RBM14, RPS3, STAG2, STMN1, TUBB]
GO:0006839	mitochondrial transport	GO_BiologicalProcess-EBI-UniProt-GOA_17.02.2020_00h00	1.94795e-11	3.72254e-08	5.63997e-14	2.08679e-12	[4]	Group39	14.6853	42	[ABCB10, AFG3L2, AIP, ATP5F1A, ATP5F1B, ATP5F1C, ATP5F1D, ATP5PB, ATP5PD, ATP5PO, BAX, COX5B, CXADR, GRPEL1, HSP90AA1, HSPD1, LETM1, OPA1, OXA1L, PRKAA1, PSEN1, SAMM50, SF1, SFN, SFXN1, SFXN3, SLC25A1, SLC25A10, SLC25A13, SLC25A15, SLC25A22, SLC25A24, SLC25A5, SLC25A6, STOML2, TIMM44, TIMM50, TNPO1, TOMM20, TOMM22, TOMM40, YWHAG]
GO:0007006	mitochondrial membrane organization	GO_BiologicalProcess-EBI-UniProt-GOA_17.02.2020_00h00	4.26654e-10	8.04242e-07	5.63997e-14	2.08679e-12	[4, 5]	Group39	17.4699	29	[AFG3L2, ATP5F1A, ATP5F1B, ATP5F1C, ATP5F1D, ATP5PB, ATP5PD, ATP5PO, BAX, CALM1, CALM2, CALM3, CHCHD3, CXADR, DNAJC11, HSP90AA1, IMMT, LETM1, MICOS13, OPA1, OXA1L, SAMM50, SF1, SFN, SLC25A5, TIMM50, TOMM20, TOMM22, YWHAG]
GO:1990542	mitochondrial transmembrane transport	GO_BiologicalProcess-EBI-UniProt-GOA_17.02.2020_00h00	5.41763e-11	1.03152e-07	5.63997e-14	2.08679e-12	[5]	Group39	21.7391	25	[AFG3L2, ATP5F1A, ATP5F1B, ATP5F1C, ATP5F1D, ATP5PB, ATP5PD, ATP5PO, COX5B, GRPEL1, HSPD1, LETM1, OPA1, PRKAA1, SFXN1, SFXN3, SLC25A1, SLC25A13, SLC25A15, SLC25A22, STOML2, TIMM44, TIMM50, TOMM20, TOMM40]
GO:0007007	inner mitochondrial membrane organization	GO_BiologicalProcess-EBI-UniProt-GOA_17.02.2020_00h00	3.51401e-10	6.63094e-07	5.63997e-14	2.08679e-12	[5, 6]	Group39	32	16	[AFG3L2, ATP5F1A, ATP5F1B, ATP5F1C, ATP5F1D, ATP5PB, ATP5PD, ATP5PO, CHCHD3, DNAJC11, IMMT, LETM1, MICOS13, OPA1, OXA1L, SAMM50]
GO:0009141	nucleoside triphosphate metabolic process	GO_BiologicalProcess-EBI-UniProt-GOA_17.02.2020_00h00	1.05002e-05	0.0179659	5.63997e-14	2.08679e-12	[5, 6, 7]	Group39	14.7541	18	[AK4, ATP5F1A, ATP5F1B, ATP5F1C, ATP5F1D, ATP5PB, ATP5PD, ATP5PO, COX5B, DCTPP1, DTYMK, ITPA, OPA1, PKM, RAN, SLC25A13, STOML2, SUCLG1]
GO:0042407	cristae formation	GO_BiologicalProcess-EBI-UniProt-GOA_17.02.2020_00h00	9.05184e-11	1.72075e-07	5.63997e-14	2.08679e-12	[6, 7]	Group39	41.1765	14	[AFG3L2, ATP5F1A, ATP5F1B, ATP5F1C, ATP5F1D, ATP5PB, ATP5PD, ATP5PO, CHCHD3, DNAJC11, IMMT, LETM1, MICOS13, SAMM50]
GO:0009142	nucleoside triphosphate biosynthetic process	GO_BiologicalProcess-EBI-UniProt-GOA_17.02.2020_00h00	2.14511e-05	0.0362095	5.63997e-14	2.08679e-12	[6, 7, 8]	Group39	16.8675	14	[AK4, ATP5F1A, ATP5F1B, ATP5F1C, ATP5F1D, ATP5PB, ATP5PD, ATP5PO, COX5B, DTYMK, PKM, SLC25A13, STOML2, SUCLG1]
GO:0009144	purine nucleoside triphosphate metabolic process	GO_BiologicalProcess-EBI-UniProt-GOA_17.02.2020_00h00	8.33241e-06	0.0143317	5.63997e-14	2.08679e-12	[6, 7, 8]	Group39	17.2414	15	[AK4, ATP5F1A, ATP5F1B, ATP5F1C, ATP5F1D, ATP5PB, ATP5PD, ATP5PO, COX5B, ITPA, OPA1, PKM, RAN, SLC25A13, STOML2]
GO:0009199	ribonucleoside triphosphate metabolic process	GO_BiologicalProcess-EBI-UniProt-GOA_17.02.2020_00h00	5.32564e-06	0.00923466	5.63997e-14	2.08679e-12	[6, 7, 8]	Group39	17.8571	15	[AK4, ATP5F1A, ATP5F1B, ATP5F1C, ATP5F1D, ATP5PB, ATP5PD, ATP5PO, COX5B, ITPA, OPA1, PKM, RAN, SLC25A13, STOML2]
GO:0006754	ATP biosynthetic process	GO_BiologicalProcess-EBI-UniProt-GOA_17.02.2020_00h00	1.14654e-06	0.0020351	5.63997e-14	2.08679e-12	[3, 4, 8, 9, 10, 11]	Group39	27.5	11	[ATP5F1A, ATP5F1B, ATP5F1C, ATP5F1D, ATP5PB, ATP5PD, ATP5PO, COX5B, PKM, SLC25A13, STOML2]
GO:0009205	purine ribonucleoside triphosphate metabolic process	GO_BiologicalProcess-EBI-UniProt-GOA_17.02.2020_00h00	1.20219e-06	0.00213268	5.63997e-14	2.08679e-12	[7, 8, 9]	Group39	20	15	[AK4, ATP5F1A, ATP5F1B, ATP5F1C, ATP5F1D, ATP5PB, ATP5PD, ATP5PO, COX5B, ITPA, OPA1, PKM, RAN, SLC25A13, STOML2]
GO:0015985	energy coupled proton transport, down electrochemical gradient	GO_BiologicalProcess-EBI-UniProt-GOA_17.02.2020_00h00	1.27353e-06	0.00225797	5.63997e-14	2.08679e-12	[8, 9]	Group39	34.6154	9	[ATP5F1A, ATP5F1B, ATP5F1C, ATP5F1D, ATP5PB, ATP5PD, ATP5PO, COX5B, STOML2]
GO:0015986	ATP synthesis coupled proton transport	GO_BiologicalProcess-EBI-UniProt-GOA_17.02.2020_00h00	1.27353e-06	0.00225797	5.63997e-14	2.08679e-12	[4, 5, 9, 10, 11, 12]	Group39	34.6154	9	[ATP5F1A, ATP5F1B, ATP5F1C, ATP5F1D, ATP5PB, ATP5PD, ATP5PO, COX5B, STOML2]
GO:0042776	mitochondrial ATP synthesis coupled proton transport	GO_BiologicalProcess-EBI-UniProt-GOA_17.02.2020_00h00	3.76945e-07	0.000680385	5.63997e-14	2.08679e-12	[4, 5, 6, 7, 10, 11, 12, 13]	Group39	39.1304	9	[ATP5F1A, ATP5F1B, ATP5F1C, ATP5F1D, ATP5PB, ATP5PD, ATP5PO, COX5B, STOML2]
GO:0009206	purine ribonucleoside triphosphate biosynthetic process	GO_BiologicalProcess-EBI-UniProt-GOA_17.02.2020_00h00	2.6463e-05	0.0443255	5.63997e-14	2.08679e-12	[8, 9, 10]	Group39	20.3704	11	[ATP5F1A, ATP5F1B, ATP5F1C, ATP5F1D, ATP5PB, ATP5PD, ATP5PO, COX5B, PKM, SLC25A13, STOML2]
GO:0044766	multi-organism transport	GO_BiologicalProcess-EBI-UniProt-GOA_17.02.2020_00h00	1.44037e-05	0.0245151	6.08541e-32	2.86014e-30	[3, 4]	Group40	18.5714	13	[KPNB1, NUP107, NUP155, NUP160, NUP50, NUP58, NUP62, NUP85, NUP88, NUP98, RAN, TCP1, TSG101]
GO:0016032	viral process	GO_BiologicalProcess-EBI-UniProt-GOA_17.02.2020_00h00	1.33353e-24	2.63372e-21	6.08541e-32	2.86014e-30	[4]	Group40	12.2651	124	[ABI1, ACBD3, AGFG1, AKAP8L, ATP6V1H, BAX, BCAP31, BIN1, CALM1, CALM2, CALM3, CAPG, CD55, CDK5RAP3, CHMP1A, CHMP2A, CHMP4A, CHMP4B, CHMP5, CLDN1, COPB1, COPS7A, COPS7B, CTNNB1, CXADR, DEK, DHRS4, EGFR, EIF2AK2, EIF3A, EIF3M, EIF4A1, EIF4A2, EIF4E, F11R, FDPS, FKBP8, FMR1, G3BP2, HMGA1, HNRNPU, HSP90AA1, HSP90AB1, HSPD1, IK, ITGA2, ITGAV, KALRN, KPNB1, KRT18, MAPK1, MAPK3, MAVS, NPM1, NUP107, NUP1…
GO:0051169	nuclear transport	GO_BiologicalProcess-EBI-UniProt-GOA_17.02.2020_00h00	1.357e-08	2.50909e-05	6.08541e-32	2.86014e-30	[4, 5]	Group40	11.898	42	[AGFG1, APPL1, APPL2, CDK5, CHORDC1, CHTOP, CTNND1, DDX19A, DDX39B, EIF3A, EIF4A2, EIF4E, HGS, HMGA1, IPO9, KPNB1, LMNA, NPM1, NUP107, NUP155, NUP160, NUP50, NUP58, NUP62, NUP85, NUP88, NUP98, PHB2, PRKAG1, RAN, RBM39, RPL17, SARNP, SRRM1, SRSF5, STMN1, SYMPK, THOC1, TNPO1, U2AF1, U2AF1L4, USO1]
GO:0019058	viral life cycle	GO_BiologicalProcess-EBI-UniProt-GOA_17.02.2020_00h00	3.78386e-09	7.0569e-06	6.08541e-32	2.86014e-30	[5]	Group40	13.6882	36	[CAPG, CD55, CHMP1A, CHMP2A, CHMP4A, CHMP4B, CHMP5, CLDN1, CXADR, DEK, DHRS4, EGFR, F11R, HSP90AB1, ITGA2, ITGAV, KPNB1, NUP107, NUP155, NUP160, NUP50, NUP58, NUP62, NUP85, NUP88, NUP98, PC, PCBP1, PCBP2, PDCD6IP, PVR, RAB1B, RAN, SCARB2, SLC1A5, TSG101]
GO:0072594	establishment of protein localization to organelle	GO_BiologicalProcess-EBI-UniProt-GOA_17.02.2020_00h00	9.40012e-24	1.85276e-20	6.08541e-32	2.86014e-30	[4, 5, 6]	Group40	15.4399	86	[ACAA1, AGFG1, AGPS, AIP, AP3B1, APPL1, APPL2, BAX, CALM1, CALM2, CALM3, CHMP4A, CHMP4B, CTNND1, DDX27, DHRS4, DNM2, ECI2, GET3, GNPAT, GRPEL1, GSTK1, HGS, HSD17B4, HSP90AA1, HSPD1, IPO9, KALRN, KPNB1, LMNA, LONP1, MMAB, NUP107, NUP155, NUP50, NUP62, NUP85, NUP88, NUP98, OXA1L, PEX14, PHB2, RAB10, RAN, RPL11, RPL12, RPL13, RPL17, RPL17-C18orf32, RPL19, RPL21, RPL23A, RPL27A, RPL31, RPL5, RPL6, RP…
GO:0006913	nucleocytoplasmic transport	GO_BiologicalProcess-EBI-UniProt-GOA_17.02.2020_00h00	2.90063e-08	5.34296e-05	6.08541e-32	2.86014e-30	[5, 6]	Group40	11.7479	41	[AGFG1, APPL1, APPL2, CDK5, CHORDC1, CHTOP, CTNND1, DDX19A, DDX39B, EIF3A, EIF4A2, EIF4E, HGS, IPO9, KPNB1, LMNA, NPM1, NUP107, NUP155, NUP160, NUP50, NUP58, NUP62, NUP85, NUP88, NUP98, PHB2, PRKAG1, RAN, RBM39, RPL17, SARNP, SRRM1, SRSF5, STMN1, SYMPK, THOC1, TNPO1, U2AF1, U2AF1L4, USO1]
GO:0075733	intracellular transport of virus	GO_BiologicalProcess-EBI-UniProt-GOA_17.02.2020_00h00	2.34665e-05	0.0394707	6.08541e-32	2.86014e-30	[5, 6]	Group40	19.0476	12	[KPNB1, NUP107, NUP155, NUP160, NUP50, NUP58, NUP62, NUP85, NUP88, NUP98, RAN, TSG101]
GO:0034504	protein localization to nucleus	GO_BiologicalProcess-EBI-UniProt-GOA_17.02.2020_00h00	8.81547e-06	0.0151362	6.08541e-32	2.86014e-30	[6]	Group40	11.8182	26	[AGFG1, APPL1, APPL2, CDK5, CTNND1, HNRNPU, IPO9, KPNB1, LMNA, NUP107, NUP155, NUP50, NUP62, NUP85, NUP88, NUP98, PHB2, RAN, RANGAP1, RPF2, RPL11, RPL17, SF1, SUN1, TNPO1, VAC14]
GO:0070585	protein localization to mitochondrion	GO_BiologicalProcess-EBI-UniProt-GOA_17.02.2020_00h00	1.00661e-06	0.00179176	6.08541e-32	2.86014e-30	[6]	Group40	17.3077	18	[AIP, BAX, CALM1, CALM2, CALM3, GRPEL1, HSP90AA1, HSPD1, MTCH2, OXA1L, SAMM50, SLC25A6, TIMM44, TIMM50, TNPO1, TOMM20, TOMM22, TOMM40]
GO:0072655	establishment of protein localization to mitochondrion	GO_BiologicalProcess-EBI-UniProt-GOA_17.02.2020_00h00	6.57083e-07	0.00117684	6.08541e-32	2.86014e-30	[5, 6, 7]	Group40	18.6813	17	[AIP, BAX, CALM1, CALM2, CALM3, GRPEL1, HSP90AA1, HSPD1, OXA1L, SAMM50, SLC25A6, TIMM44, TIMM50, TNPO1, TOMM20, TOMM22, TOMM40]
GO:0051031	tRNA transport	GO_BiologicalProcess-EBI-UniProt-GOA_17.02.2020_00h00	6.98716e-07	0.00124861	6.08541e-32	2.86014e-30	[5, 6, 8]	Group40	26.087	12	[NUP107, NUP155, NUP160, NUP50, NUP58, NUP62, NUP85, NUP88, NUP98, RAN, TOMM20, YBX1]
GO:0017038	protein import	GO_BiologicalProcess-EBI-UniProt-GOA_17.02.2020_00h00	9.43569e-09	1.75032e-05	6.08541e-32	2.86014e-30	[5, 6, 7, 8]	Group40	15.3439	29	[AGFG1, APPL1, APPL2, CTNND1, GRPEL1, HSP90AA1, HSPD1, IPO9, KPNB1, LMNA, LONP1, NUP107, NUP155, NUP50, NUP62, NUP85, NUP88, NUP98, PEX14, PHB2, RAN, RPL17, SAMM50, TIMM44, TIMM50, TNPO1, TOMM20, TOMM22, TOMM40]
GO:0006626	protein targeting to mitochondrion	GO_BiologicalProcess-EBI-UniProt-GOA_17.02.2020_00h00	1.22334e-05	0.0208579	6.08541e-32	2.86014e-30	[5, 6, 7, 8, 9, 10]	Group40	18.8406	13	[AIP, GRPEL1, HSP90AA1, HSPD1, OXA1L, SAMM50, SLC25A6, TIMM44, TIMM50, TNPO1, TOMM20, TOMM22, TOMM40]
GO:0097064	ncRNA export from nucleus	GO_BiologicalProcess-EBI-UniProt-GOA_17.02.2020_00h00	9.92121e-06	0.0169851	6.08541e-32	2.86014e-30	[6, 7, 8, 9]	Group40	22.449	11	[NPM1, NUP107, NUP155, NUP160, NUP50, NUP58, NUP62, NUP85, NUP88, NUP98, RAN]
GO:0071431	tRNA-containing ribonucleoprotein complex export from nucleus	GO_BiologicalProcess-EBI-UniProt-GOA_17.02.2020_00h00	1.8038e-05	0.0305925	6.08541e-32	2.86014e-30	[5, 6, 7, 8, 9, 10, 11]	Group40	23.2558	10	[NUP107, NUP155, NUP160, NUP50, NUP58, NUP62, NUP85, NUP88, NUP98, RAN]
GO:0006409	tRNA export from nucleus	GO_BiologicalProcess-EBI-UniProt-GOA_17.02.2020_00h00	1.8038e-05	0.0305925	6.08541e-32	2.86014e-30	[6, 7, 8, 9, 10, 11, 12]	Group40	23.2558	10	[NUP107, NUP155, NUP160, NUP50, NUP58, NUP62, NUP85, NUP88, NUP98, RAN]
GO:0010033	response to organic substance	GO_BiologicalProcess-EBI-UniProt-GOA_17.02.2020_00h00	8.61978e-11	1.63948e-07	1.6814e-13	5.8849e-12	[3]	Group41	6.6204	248	[ABHD14B, ACAT1, ACSL3, ACTB, ACTC1, ACTG1, ACTN4, ADD1, ADNP, AGFG1, AIP, ALPP, AP3S1, APPL1, APPL2, APRT, ARF6, ARFGAP3, ARHGDIA, ASS1, ATP1A1, ATP2B4, ATP5F1B, ATP6V1A, ATP6V1B2, ATP6V1D, ATP6V1E1, ATP6V1G1, ATP6V1H, BAIAP2, BAX, BCLAF1, BOLA2, BOLA2B, BSG, CACYBP, CALM1, CALM2, CALM3, CAMK2B, CAMK2G, CANX, CASP6, CCDC6, CCT6A, CD9, CDK11B, CDK5, CDK5RAP3, CEACAM1, CHMP5, CLDN1, CNPY2, COASY, …
GO:0042493	response to drug	GO_BiologicalProcess-EBI-UniProt-GOA_17.02.2020_00h00	5.26048e-06	0.00912693	1.6814e-13	5.8849e-12	[3]	Group41	7.21118	98	[ACTB, ACTC1, AGFG1, AK4, ARRB1, ASS1, ATP1A1, ATP2B4, BAIAP2, BSG, CACYBP, CALM1, CALM2, CALM3, CCDC6, CCT6A, CDK5, CHMP5, CLDN1, COASY, COMT, CPS1, CTNNA1, CTNNB1, CYP2S1, DNM2, DPEP1, DPYSL2, DSG2, EEF1B2, EEF2, EGFR, EIF4A2, EIF4E, EIF4G2, EPS8, FLOT1, FMR1, FOLR1, GNA11, GNAS, GNB1, GNPAT, HADHA, HPRT1, HSP90AA1, HSP90AB1, HSP90B1, HSPD1, ITGA2, JUP, LARP1, LDHA, MAPK1, MAPK3, MARCKSL1, MMAB…
GO:0070887	cellular response to chemical stimulus	GO_BiologicalProcess-EBI-UniProt-GOA_17.02.2020_00h00	6.53233e-12	1.25355e-08	1.6814e-13	5.8849e-12	[3]	Group41	6.78337	248	[ABHD14B, ACAA1, ACTB, ACTG1, ACTN4, ADD1, AGFG1, AIP, AK4, ALPG, ALPP, ANK3, AP3S1, APPL1, APPL2, APRT, ARF6, ARFGAP3, ARHGDIA, ASS1, ATP1A1, ATP2B4, ATP5F1B, ATP6V1A, ATP6V1B2, ATP6V1D, ATP6V1E1, ATP6V1G1, ATP6V1H, BAIAP2, BAX, BCLAF1, BOLA2, BOLA2B, BSG, CACYBP, CALM1, CALM3, CAMK2B, CAMK2G, CANX, CASP6, CCDC115, CCDC6, CCS, CCT6A, CDK11B, CDK5, CDK5RAP3, CEACAM1, CHMP5, CLDN1, CNPY2, COASY, C…
GO:1901698	response to nitrogen compound	GO_BiologicalProcess-EBI-UniProt-GOA_17.02.2020_00h00	5.53784e-10	1.04222e-06	1.6814e-13	5.8849e-12	[3]	Group41	8.20257	115	[ACTB, AP3S1, APPL1, APRT, ASS1, ATP2B4, ATP6V1A, ATP6V1B2, ATP6V1D, ATP6V1E1, ATP6V1G1, ATP6V1H, BAIAP2, BSG, CACYBP, CALM1, CALM2, CALM3, CASP6, CCT6A, CD9, CDK5, CEACAM1, CHMP5, COASY, CPS1, CTNNA1, CTNNB1, CTNND1, DDX21, DNM2, DPEP1, DPYSL2, EEF2, EGFR, EIF2B1, EIF3A, ERLIN1, ERLIN2, ETF1, EZR, FAF2, FLOT1, FMR1, FOLR1, GNA11, GNAS, GNB1, GOT1, HADHA, HGS, HPRT1, HSP90AA1, HSP90AB1, HSP90B1, …
GO:1901700	response to oxygen-containing compound	GO_BiologicalProcess-EBI-UniProt-GOA_17.02.2020_00h00	1.27569e-06	0.00226053	1.6814e-13	5.8849e-12	[3]	Group41	6.78623	140	[ACTB, ACTC1, ADNP, AGFG1, ALPP, AP3S1, APPL1, APRT, ASS1, ATP1A1, ATP2B4, ATP6V1A, ATP6V1B2, ATP6V1D, ATP6V1E1, ATP6V1G1, ATP6V1H, BAIAP2, BSG, CACYBP, CALM1, CALM2, CALM3, CCDC6, CCS, CCT6A, CD9, CDK11B, CDK5, CEACAM1, CHMP5, CLDN1, CNPY2, COASY, COMT, CPS1, CTNNA1, CTNNB1, CTNND1, CXADR, DDX18, DNM2, DPEP1, DPYSL2, DSG2, EEF1B2, EEF2, EGFR, EIF2B1, EIF3A, EIF4A2, EIF4E, EPS8, ETF1, EZR, FDPS, …
GO:0010243	response to organonitrogen compound	GO_BiologicalProcess-EBI-UniProt-GOA_17.02.2020_00h00	1.28331e-09	2.40492e-06	1.6814e-13	5.8849e-12	[4]	Group41	8.28856	108	[ACTB, AP3S1, APPL1, APRT, ASS1, ATP2B4, ATP6V1A, ATP6V1B2, ATP6V1D, ATP6V1E1, ATP6V1G1, ATP6V1H, BAIAP2, BSG, CACYBP, CALM1, CALM2, CALM3, CASP6, CCT6A, CD9, CDK5, CEACAM1, CHMP5, COASY, CPS1, CTNNA1, CTNNB1, CTNND1, DNM2, DPEP1, DPYSL2, EEF2, EGFR, EIF2B1, EIF3A, ERLIN1, ERLIN2, ETF1, EZR, FAF2, FOLR1, GNA11, GNAS, GNB1, GOT1, HADHA, HGS, HPRT1, HSP90AA1, HSP90AB1, HSP90B1, HSPD1, IGF2BP1, INPP…
GO:0071310	cellular response to organic substance	GO_BiologicalProcess-EBI-UniProt-GOA_17.02.2020_00h00	9.86296e-09	1.82859e-05	1.6814e-13	5.8849e-12	[4]	Group41	6.6622	199	[ABHD14B, ACTB, ACTG1, ACTN4, ADD1, AGFG1, AIP, ALPP, AP3S1, APPL1, APPL2, APRT, ARF6, ARFGAP3, ARHGDIA, ASS1, ATP1A1, ATP2B4, ATP5F1B, ATP6V1A, ATP6V1B2, ATP6V1D, ATP6V1E1, ATP6V1G1, ATP6V1H, BAIAP2, BAX, BCLAF1, BOLA2, BOLA2B, CACYBP, CALM1, CALM3, CAMK2B, CAMK2G, CANX, CASP6, CCDC6, CCT6A, CDK11B, CDK5, CDK5RAP3, CEACAM1, CHMP5, CLDN1, CNPY2, COASY, CPS1, CTNNA1, CTNNB1, CTNND1, CXADR, DCTN1, …
GO:1901699	cellular response to nitrogen compound	GO_BiologicalProcess-EBI-UniProt-GOA_17.02.2020_00h00	4.24887e-08	7.80943e-05	1.6814e-13	5.8849e-12	[4]	Group41	8.84434	75	[ACTB, AP3S1, APPL1, APRT, ASS1, ATP2B4, ATP6V1A, ATP6V1B2, ATP6V1D, ATP6V1E1, ATP6V1G1, ATP6V1H, BAIAP2, CASP6, CCT6A, CDK5, CEACAM1, CHMP5, COASY, CPS1, CTNNA1, CTNNB1, CTNND1, DNM2, DPEP1, EGFR, ETF1, EZR, FLOT1, FMR1, FOLR1, GNA11, GNAS, GNB1, GOT1, HGS, HSP90B1, JUP, KDM1A, LARP1, MAPK1, MAPK3, MARCKSL1, MARS1, MAVS, MTTP, NAMPT, NPM1, OPA1, PAK1, PCK2, PKM, PRKAA1, PRKACA, PRKACB, PRKAR2A, …
GO:1901701	cellular response to oxygen-containing compound	GO_BiologicalProcess-EBI-UniProt-GOA_17.02.2020_00h00	6.90133e-06	0.0119255	1.6814e-13	5.8849e-12	[4]	Group41	7.14796	100	[ACTB, AGFG1, ALPP, AP3S1, APPL1, APRT, ASS1, ATP2B4, ATP6V1A, ATP6V1B2, ATP6V1D, ATP6V1E1, ATP6V1G1, ATP6V1H, BAIAP2, CACYBP, CCDC6, CCS, CCT6A, CDK11B, CDK5, CEACAM1, CHMP5, CLDN1, COASY, CPS1, CTNNA1, CTNNB1, CTNND1, CXADR, DDX18, DNM2, DPEP1, EGFR, EIF4A2, EIF4E, ETF1, EZR, FDPS, FOLR1, GFER, GNA11, GNAS, GNB1, GOT1, HGS, HSP90B1, ITGA2, JUP, KDM1A, LARP1, LONP1, MAPK1, MAPK3, MARCKSL1, MARS1…
GO:0071417	cellular response to organonitrogen compound	GO_BiologicalProcess-EBI-UniProt-GOA_17.02.2020_00h00	1.40334e-07	0.000255127	1.6814e-13	5.8849e-12	[4, 5]	Group41	8.86889	69	[ACTB, AP3S1, APPL1, APRT, ASS1, ATP2B4, ATP6V1A, ATP6V1B2, ATP6V1D, ATP6V1E1, ATP6V1G1, ATP6V1H, BAIAP2, CASP6, CCT6A, CDK5, CEACAM1, CHMP5, COASY, CPS1, CTNNA1, CTNNB1, CTNND1, DNM2, EGFR, ETF1, EZR, FOLR1, GNA11, GNAS, GNB1, GOT1, HGS, HSP90B1, JUP, KDM1A, LARP1, MAPK1, MAPK3, MARCKSL1, MARS1, MTTP, NAMPT, OPA1, PAK1, PCK2, PKM, PRKAA1, PRKACA, PRKACB, PRKAR2A, PRKCA, PRKCD, PSEN1, PXN, RAB10,…
GO:1901652	response to peptide	GO_BiologicalProcess-EBI-UniProt-GOA_17.02.2020_00h00	9.36817e-06	0.0160664	1.6814e-13	5.8849e-12	[4, 5]	Group41	8.48485	56	[AP3S1, APPL1, APRT, ASS1, ATP6V1A, ATP6V1B2, ATP6V1D, ATP6V1E1, ATP6V1G1, ATP6V1H, BAIAP2, BSG, CACYBP, CDK5, CEACAM1, CHMP5, COASY, CPS1, CTNND1, EIF2B1, EIF3A, ETF1, GNAS, GOT1, HADHA, HGS, HSP90AA1, INPPL1, MARCKSL1, MARS1, NAMPT, PAK1, PCK2, PDAP1, PKM, PRKACA, PRKACB, PRKAR2A, PRKCA, PRKCD, PSEN1, PXN, RAB10, RAB8A, RANGAP1, RBM14, RPL17, SF1, SLC2A1, SORBS1, SRC, SRSF5, SYAP1, TMPO, VDAC2,…
GO:0043434	response to peptide hormone	GO_BiologicalProcess-EBI-UniProt-GOA_17.02.2020_00h00	4.59708e-06	0.00799891	1.6814e-13	5.8849e-12	[4, 5, 6]	Group41	9.09091	49	[AP3S1, APPL1, APRT, ASS1, ATP6V1A, ATP6V1B2, ATP6V1D, ATP6V1E1, ATP6V1G1, ATP6V1H, BAIAP2, BSG, CACYBP, CEACAM1, COASY, CPS1, CTNND1, EIF2B1, EIF3A, ETF1, GNAS, GOT1, HADHA, HGS, INPPL1, MARCKSL1, MARS1, PAK1, PCK2, PDAP1, PKM, PRKACA, PRKACB, PRKAR2A, PRKCA, PRKCD, PXN, RAB10, RAB8A, RANGAP1, RBM14, SF1, SLC2A1, SORBS1, SRC, SRSF5, SYAP1, VDAC2, YWHAG]
GO:1901653	cellular response to peptide	GO_BiologicalProcess-EBI-UniProt-GOA_17.02.2020_00h00	3.43093e-06	0.00598697	1.6814e-13	5.8849e-12	[5, 6]	Group41	9.62801	44	[AP3S1, APPL1, APRT, ASS1, ATP6V1A, ATP6V1B2, ATP6V1D, ATP6V1E1, ATP6V1G1, ATP6V1H, BAIAP2, CDK5, CEACAM1, CHMP5, COASY, CPS1, CTNND1, ETF1, GNAS, GOT1, HGS, MARCKSL1, MARS1, NAMPT, PAK1, PCK2, PKM, PRKACA, PRKACB, PRKAR2A, PRKCA, PRKCD, PSEN1, PXN, RAB10, RAB8A, RANGAP1, RPL17, SORBS1, SRC, SRSF5, SYAP1, VDAC2, YWHAG]
GO:0032868	response to insulin	GO_BiologicalProcess-EBI-UniProt-GOA_17.02.2020_00h00	2.44352e-05	0.0410267	1.6814e-13	5.8849e-12	[5, 6, 7]	Group41	10.2236	32	[AP3S1, APPL1, APRT, ATP6V1A, ATP6V1B2, ATP6V1D, ATP6V1E1, ATP6V1G1, ATP6V1H, BAIAP2, CEACAM1, COASY, CTNND1, EIF3A, ETF1, GOT1, HADHA, HGS, INPPL1, MARCKSL1, MARS1, PAK1, PCK2, PKM, RAB10, RAB8A, SLC2A1, SORBS1, SRC, SRSF5, SYAP1, YWHAG]
GO:0071375	cellular response to peptide hormone stimulus	GO_BiologicalProcess-EBI-UniProt-GOA_17.02.2020_00h00	6.48407e-07	0.00116195	1.6814e-13	5.8849e-12	[5, 6, 7]	Group41	10.7735	39	[AP3S1, APPL1, APRT, ASS1, ATP6V1A, ATP6V1B2, ATP6V1D, ATP6V1E1, ATP6V1G1, ATP6V1H, BAIAP2, CEACAM1, COASY, CPS1, CTNND1, ETF1, GNAS, GOT1, HGS, MARCKSL1, MARS1, PAK1, PCK2, PKM, PRKACA, PRKACB, PRKAR2A, PRKCA, PRKCD, PXN, RAB10, RAB8A, RANGAP1, SORBS1, SRC, SRSF5, SYAP1, VDAC2, YWHAG]
GO:0032869	cellular response to insulin stimulus	GO_BiologicalProcess-EBI-UniProt-GOA_17.02.2020_00h00	2.44937e-06	0.0043011	1.6814e-13	5.8849e-12	[6, 7, 8]	Group41	12.1212	28	[AP3S1, APPL1, APRT, ATP6V1A, ATP6V1B2, ATP6V1D, ATP6V1E1, ATP6V1G1, ATP6V1H, BAIAP2, CEACAM1, COASY, CTNND1, ETF1, GOT1, HGS, MARCKSL1, MARS1, PAK1, PCK2, PKM, RAB10, RAB8A, SORBS1, SRC, SRSF5, SYAP1, YWHAG]
GO:0006518	peptide metabolic process	GO_BiologicalProcess-EBI-UniProt-GOA_17.02.2020_00h00	2.86554e-24	5.6537e-21	7.3811e-17	2.95244e-15	[4, 5]	Group42	14.4578	96	[ABCF1, AIMP2, AIP, BSG, DARS2, DPEP1, EEF1A1, EEF1A1P5, EEF1B2, EEF1D, EEF1E1, EEF2, EGFR, EIF2AK2, EIF2B1, EIF2S2, EIF3A, EIF3E, EIF3H, EIF3J, EIF3M, EIF4A1, EIF4A2, EIF4B, EIF4E, EIF4G2, EIF5, ETF1, FARSB, GFM2, GSTK1, HGS, HSPD1, IARS2, IGF2BP1, IGF2BP2, IGF2BP3, LARP1, MARS1, MRPL11, MRPL16, MRPL19, MRPL24, MRPL3, MRPL38, MRPL9, MRPS31, MRPS36, MTIF2, NARS1, NDRG1, NRBP1, OXA1L, PPA2, PSEN1,…
GO:0034248	regulation of cellular amide metabolic process	GO_BiologicalProcess-EBI-UniProt-GOA_17.02.2020_00h00	2.65686e-15	5.17822e-12	7.3811e-17	2.95244e-15	[5]	Group42	12.4789	74	[ABCF1, ALPP, BIN1, BSG, CALM2, CALM3, CELF1, DDX39B, EEF1A1, EEF1A1P5, EEF1B2, EEF1D, EEF2, EIF2AK2, EIF2B1, EIF2S2, EIF3A, EIF3E, EIF3H, EIF3J, EIF3M, EIF4A1, EIF4A2, EIF4B, EIF4E, EIF4G2, EIF5, ETF1, FMR1, FXR2, GFM2, IGF2BP1, IGF2BP2, IGF2BP3, ITGA2, KHDRBS1, KHSRP, LARP1, LARP4B, MAPK1, MAPK3, MATR3, MTIF2, NCL, NPM1, PAPSS2, PDP1, PICALM, PKP3, PRKAA1, PRKCD, PRKCSH, PYM1, RBM39, RBM4, RBM4…
GO:0032268	regulation of cellular protein metabolic process	GO_BiologicalProcess-EBI-UniProt-GOA_17.02.2020_00h00	3.33973e-09	6.23194e-06	7.3811e-17	2.95244e-15	[5, 6]	Group42	6.59043	219	[ABCF1, ABHD14B, ABI1, ACTB, ADNP, ADRM1, AGFG1, AIMP2, AIP, AKAP8L, ALPP, APPL2, ARRB1, ASPH, ATP2B4, BAX, BCAP31, BIN1, CALM1, CALM2, CALM3, CAMK2B, CAST, CCDC6, CDC37, CDK5, CDK5RAP3, CEACAM1, CELF1, CHORDC1, CHTOP, CLPX, COPS8, CSNK1A1, CTNNB1, CXADR, DDRGK1, DDX39B, DIABLO, DPEP1, EEF1A1, EEF1A1P5, EEF1B2, EEF1D, EEF2, EGFR, EHD4, EIF2AK2, EIF2B1, EIF2S2, EIF3A, EIF3E, EIF3H, EIF3J, EIF3M, E…
GO:0043043	peptide biosynthetic process	GO_BiologicalProcess-EBI-UniProt-GOA_17.02.2020_00h00	5.38343e-27	1.06969e-23	7.3811e-17	2.95244e-15	[5, 6]	Group42	17.3116	85	[ABCF1, AIMP2, AIP, DARS2, EEF1A1, EEF1A1P5, EEF1B2, EEF1D, EEF1E1, EEF2, EGFR, EIF2AK2, EIF2B1, EIF2S2, EIF3A, EIF3E, EIF3H, EIF3J, EIF3M, EIF4A1, EIF4A2, EIF4B, EIF4E, EIF4G2, EIF5, ETF1, FARSB, GFM2, HGS, HSPD1, IARS2, IGF2BP3, LARP1, MARS1, MRPL11, MRPL16, MRPL19, MRPL24, MRPL3, MRPL38, MRPL9, MRPS31, MRPS36, MTIF2, NARS1, NDRG1, OXA1L, PPA2, RARS1, RBM4, RPL11, RPL12, RPL13, RPL17, RPL17-C18…
GO:0006412	translation	GO_BiologicalProcess-EBI-UniProt-GOA_17.02.2020_00h00	6.18663e-29	1.23423e-25	7.3811e-17	2.95244e-15	[5, 6, 7]	Group42	18.3983	85	[ABCF1, AIMP2, AIP, DARS2, EEF1A1, EEF1A1P5, EEF1B2, EEF1D, EEF1E1, EEF2, EGFR, EIF2AK2, EIF2B1, EIF2S2, EIF3A, EIF3E, EIF3H, EIF3J, EIF3M, EIF4A1, EIF4A2, EIF4B, EIF4E, EIF4G2, EIF5, ETF1, FARSB, GFM2, HGS, HSPD1, IARS2, IGF2BP3, LARP1, MARS1, MRPL11, MRPL16, MRPL19, MRPL24, MRPL3, MRPL38, MRPL9, MRPS31, MRPS36, MTIF2, NARS1, NDRG1, OXA1L, PPA2, RARS1, RBM4, RPL11, RPL12, RPL13, RPL17, RPL17-C18…
GO:0006413	translational initiation	GO_BiologicalProcess-EBI-UniProt-GOA_17.02.2020_00h00	8.51013e-20	1.67054e-16	7.3811e-17	2.95244e-15	[3, 6, 7, 8]	Group42	24.1573	43	[EIF2B1, EIF2S2, EIF3A, EIF3E, EIF3H, EIF3J, EIF3M, EIF4A1, EIF4A2, EIF4B, EIF4E, EIF4G2, EIF5, LARP1, MTIF2, RBM4, RPL11, RPL12, RPL13, RPL17, RPL17-C18orf32, RPL19, RPL21, RPL23A, RPL27A, RPL31, RPL5, RPL6, RPL8, RPL9, RPLP2, RPS14, RPS2, RPS20, RPS26, RPS27, RPS3, RPS3A, RPS4X, RPS5, RPS6, RPS7, SLC16A1]
GO:0010608	posttranscriptional regulation of gene expression	GO_BiologicalProcess-EBI-UniProt-GOA_17.02.2020_00h00	2.19848e-13	4.26065e-10	7.3811e-17	2.95244e-15	[6]	Group42	11.0193	80	[ABCF1, ALPP, CDC37, CELF1, DDX39B, EEF1A1, EEF1A1P5, EEF1B2, EEF1D, EEF2, EIF2AK2, EIF2B1, EIF2S2, EIF3A, EIF3E, EIF3H, EIF3J, EIF3M, EIF4A1, EIF4A2, EIF4B, EIF4E, EIF4G2, EIF5, EPB41L5, ETF1, EXOSC6, FMR1, FUS, FXR2, GFM2, HNRNPM, HNRNPU, IGF2BP1, IGF2BP2, IGF2BP3, ITGA2, KHDRBS1, KHSRP, LARP1, LARP4B, MAPK1, MAPK3, MATR3, MTIF2, NCL, NPM1, NSUN2, PKP3, PRKACA, PRKCA, PRKCD, PRKCSH, PRKRA, PSMC…
GO:0034250	positive regulation of cellular amide metabolic process	GO_BiologicalProcess-EBI-UniProt-GOA_17.02.2020_00h00	4.30162e-08	7.90208e-05	7.3811e-17	2.95244e-15	[6]	Group42	14.3564	29	[ALPP, CALM2, CALM3, DDX39B, EEF2, EIF3A, EIF3E, EIF4A2, EIF4E, EIF4G2, FMR1, FXR2, ITGA2, KHDRBS1, LARP1, LARP4B, MAPK1, MAPK3, NPM1, PAPSS2, PICALM, PRKCD, PRKCSH, PYM1, RPL5, RPS27L, RPS4X, SIRT3, TRMT10C]
GO:0006417	regulation of translation	GO_BiologicalProcess-EBI-UniProt-GOA_17.02.2020_00h00	1.44502e-12	2.79033e-09	7.3811e-17	2.95244e-15	[6, 7]	Group42	12.2047	62	[ABCF1, ALPP, CELF1, DDX39B, EEF1A1, EEF1A1P5, EEF1B2, EEF1D, EEF2, EIF2AK2, EIF2B1, EIF2S2, EIF3A, EIF3E, EIF3H, EIF3J, EIF3M, EIF4A1, EIF4A2, EIF4B, EIF4E, EIF4G2, EIF5, ETF1, FMR1, FXR2, GFM2, IGF2BP1, IGF2BP2, IGF2BP3, ITGA2, KHDRBS1, KHSRP, LARP1, LARP4B, MAPK1, MAPK3, MATR3, MTIF2, NCL, NPM1, PKP3, PRKCSH, PYM1, RBM39, RBM4, RBM4B, RPL5, RPS14, RPS27L, RPS3, RPS4X, RPS6KA3, SARNP, SLC16A1, …
GO:1903311	regulation of mRNA metabolic process	GO_BiologicalProcess-EBI-UniProt-GOA_17.02.2020_00h00	2.37707e-06	0.00417888	7.3811e-17	2.95244e-15	[6, 7]	Group42	9.79499	43	[CDK11A, CDK11B, CELF1, DDX5, EIF4A2, EIF4E, ETF1, EXOSC6, FMR1, FUS, FXR2, HGS, HNRNPM, HNRNPU, IGF2BP1, IGF2BP2, IGF2BP3, IK, KHDRBS1, KHSRP, LARP1, MARCKSL1, MBNL1, NCL, NPM1, NUP98, PDAP1, PKP3, PRKACA, PRKCA, PRKCD, PSMC6, PSMD8, PSME1, PSMF1, RBM4, RBM4B, SNRNP70, SRSF10, SRSF5, THRAP3, TNPO1, YBX1]
GO:0002181	cytoplasmic translation	GO_BiologicalProcess-EBI-UniProt-GOA_17.02.2020_00h00	5.62006e-13	1.08748e-09	7.3811e-17	2.95244e-15	[6, 7, 8]	Group42	25.2427	26	[EIF2B1, EIF2S2, EIF3A, EIF3E, EIF3H, EIF3J, EIF3M, EIF4A1, EIF4A2, EIF4E, EIF5, ETF1, HSPD1, NDRG1, RBM4, RPL11, RPL17, RPL17-C18orf32, RPL19, RPL31, RPL6, RPL8, RPL9, RPS26, SLC16A1, ZC3H15]
GO:0002183	cytoplasmic translational initiation	GO_BiologicalProcess-EBI-UniProt-GOA_17.02.2020_00h00	3.47423e-08	6.39259e-05	7.3811e-17	2.95244e-15	[4, 7, 8, 9]	Group42	30.2326	13	[EIF2B1, EIF2S2, EIF3A, EIF3E, EIF3H, EIF3J, EIF3M, EIF4A1, EIF4A2, EIF4E, EIF5, RBM4, SLC16A1]
GO:0001732	formation of cytoplasmic translation initiation complex	GO_BiologicalProcess-EBI-UniProt-GOA_17.02.2020_00h00	3.28515e-06	0.00574572	7.3811e-17	2.95244e-15	[5, 6, 7, 8, 9, 10]	Group42	36.3636	8	[EIF2B1, EIF2S2, EIF3A, EIF3E, EIF3H, EIF3J, EIF3M, EIF5]
GO:0006446	regulation of translational initiation	GO_BiologicalProcess-EBI-UniProt-GOA_17.02.2020_00h00	9.62694e-06	0.0165006	7.3811e-17	2.95244e-15	[7, 8]	Group42	17.0455	15	[EIF2AK2, EIF2B1, EIF3E, EIF3H, EIF4A2, EIF4B, EIF4E, EIF4G2, EIF5, FMR1, KHDRBS1, LARP1, MTIF2, NPM1, RBM4]
GO:0045182	translation regulator activity	GO_BiologicalProcess-EBI-UniProt-GOA_17.02.2020_00h00	4.31838e-13	8.3647e-10	7.3811e-17	2.95244e-15	[7, 8]	Group42	19.1257	35	[ABCF1, CELF1, EEF1A1, EEF1A1P5, EEF1B2, EEF1D, EEF2, EIF2AK2, EIF2B1, EIF2S2, EIF3A, EIF3E, EIF3H, EIF3J, EIF3M, EIF4A1, EIF4A2, EIF4B, EIF4E, EIF4G2, EIF5, ETF1, FMR1, FXR2, GFM2, IGF2BP1, IGF2BP2, IGF2BP3, LARP1, MTIF2, RPS14, RPS27L, SLC16A1, TSFM, TUFM]
GO:0045727	positive regulation of translation	GO_BiologicalProcess-EBI-UniProt-GOA_17.02.2020_00h00	1.03621e-06	0.00184237	7.3811e-17	2.95244e-15	[7, 8]	Group42	14.375	23	[ALPP, DDX39B, EEF2, EIF3A, EIF3E, EIF4A2, EIF4E, EIF4G2, FMR1, FXR2, ITGA2, KHDRBS1, LARP1, LARP4B, MAPK1, MAPK3, NPM1, PRKCSH, PYM1, RPL5, RPS27L, RPS4X, TRMT10C]
GO:0008135	translation factor activity, RNA binding	GO_BiologicalProcess-EBI-UniProt-GOA_17.02.2020_00h00	1.92793e-11	3.6862e-08	7.3811e-17	2.95244e-15	[6, 7, 8, 9, 10]	Group42	22.7273	25	[ABCF1, EEF1A1, EEF1A1P5, EEF1B2, EEF1D, EEF2, EIF2B1, EIF2S2, EIF3A, EIF3E, EIF3H, EIF3J, EIF3M, EIF4A1, EIF4A2, EIF4B, EIF4E, EIF4G2, EIF5, ETF1, GFM2, MTIF2, SLC16A1, TSFM, TUFM]
GO:0003743	translation initiation factor activity	GO_BiologicalProcess-EBI-UniProt-GOA_17.02.2020_00h00	1.07385e-07	0.000195655	7.3811e-17	2.95244e-15	[4, 7, 8, 9, 10, 11]	Group42	23.8095	15	[EIF2B1, EIF2S2, EIF3A, EIF3E, EIF3H, EIF3J, EIF3M, EIF4A1, EIF4A2, EIF4B, EIF4E, EIF4G2, EIF5, MTIF2, SLC16A1]
GO:0090079	translation regulator activity, nucleic acid binding	GO_BiologicalProcess-EBI-UniProt-GOA_17.02.2020_00h00	3.1618e-11	6.03272e-08	7.3811e-17	2.95244e-15	[8, 9]	Group42	20	28	[ABCF1, CELF1, EEF1A1, EEF1A1P5, EEF1B2, EEF1D, EEF2, EIF2B1, EIF2S2, EIF3A, EIF3E, EIF3H, EIF3J, EIF3M, EIF4A1, EIF4A2, EIF4B, EIF4E, EIF4G2, EIF5, ETF1, GFM2, LARP1, MTIF2, RPS27L, SLC16A1, TSFM, TUFM]
GO:0000184	nuclear-transcribed mRNA catabolic process, nonsense-mediated decay	GO_BiologicalProcess-EBI-UniProt-GOA_17.02.2020_00h00	6.96238e-14	1.3507e-10	7.3811e-17	2.95244e-15	[8, 9, 10]	Group42	21.4286	33	[EIF3E, EIF4A2, EIF4E, ETF1, EXOSC10, PPP2R1A, PYM1, RPL11, RPL12, RPL13, RPL17, RPL17-C18orf32, RPL19, RPL21, RPL23A, RPL27A, RPL31, RPL5, RPL6, RPL8, RPL9, RPLP2, RPS14, RPS2, RPS20, RPS26, RPS27, RPS3, RPS3A, RPS4X, RPS5, RPS6, RPS7]
GO:0019222	regulation of metabolic process	GO_BiologicalProcess-EBI-UniProt-GOA_17.02.2020_00h00	4.69737e-07	0.000845997	1.33621e-05	8.01728e-05	[3]	Group43	5.47379	424	[ABCF1, ABHD14B, ABI1, ACAT1, ACSL3, ACTA2, ACTB, ACTC1, ACTG1, ACTG2, ACTN4, ADNP, ADRM1, AFDN, AGFG1, AGPAT1, AGR2, AHNAK, AIMP2, AIP, AK4, AKAP8L, ALDOC, ALPG, ALPP, ANK3, APPL1, APPL2, ARID3A, ARMCX3, ARRB1, ASPH, ASS1, ATAD1, ATP1A1, ATP1B1, ATP2B4, ATP6V1A, ATP6V1B2, ATP6V1D, ATP6V1E1, ATP6V1G1, ATP6V1H, BASP1, BAX, BCAP31, BCLAF1, BIN1, BPNT1, BRCC3, BSG, CACYBP, CALM1, CALM2, CALM3, CAMK2…
GO:0044093	positive regulation of molecular function	GO_BiologicalProcess-EBI-UniProt-GOA_17.02.2020_00h00	1.74472e-06	0.00307769	1.33621e-05	8.01728e-05	[3]	Group43	6.61445	152	[ABHD14B, ABI1, ACTN4, ADD1, ADNP, ADRM1, AFDN, AGFG1, AIMP2, ALDOC, ALPG, ALPP, ANK3, ARFGAP3, ARHGDIA, ARRB1, ASPH, ATP1B1, ATP1B3, ATP2B4, BAX, BCAP31, CALM1, CALM2, CALM3, CAMK2B, CCDC6, CCS, CCT2, CCT4, CCT6A, CDK5, CHORDC1, CHTOP, CLPX, COPS8, CTNNB1, CYB5B, DDRGK1, DIABLO, DNAJB1, DNM2, EGFR, EIF2AK2, EIF3E, EIF4A2, EIF4E, EIF5, EPB41L5, ETFA, F11R, FAM162A, FLOT1, FMR1, GAMT, GFER, GNAS, …
GO:0048518	positive regulation of biological process	GO_BiologicalProcess-EBI-UniProt-GOA_17.02.2020_00h00	1.05186e-08	1.94909e-05	1.33621e-05	8.01728e-05	[3]	Group43	5.67455	408	[ABHD14B, ABI1, ACAT1, ACIN1, ACSL3, ACTA2, ACTB, ACTC1, ACTG1, ACTG2, ACTN4, ADD1, ADNP, ADRM1, AFDN, AGFG1, AGPAT1, AGR2, AIMP2, AIP, AKAP8L, ALPG, ALPP, ANK3, ANXA13, AP3B1, APPL1, APPL2, ARF6, ARHGDIA, ARID3A, ARMCX3, ARRB1, ASPH, ASS1, ATAD1, ATP1A1, ATP1B1, ATP1B3, ATP2B4, ATP5F1A, ATP5F1B, BAIAP2, BASP1, BAX, BCAP31, BCLAF1, BIN1, BPNT1, BRCC3, BTF3, CACYBP, CALM1, CALM2, CALM3, CAMK2B, CA…
GO:0048519	negative regulation of biological process	GO_BiologicalProcess-EBI-UniProt-GOA_17.02.2020_00h00	9.65242e-07	0.0017191	1.33621e-05	8.01728e-05	[3]	Group43	5.61976	355	[ABHD14B, ABI1, ACTC1, ACTN4, ADD1, ADNP, AFDN, AGFG1, AGR2, AIMP2, AIP, ALDOC, ALPP, ANK3, APPL1, APPL2, ARF6, ARFIP1, ARHGDIA, ARID3A, ARRB1, ASPH, ASS1, ATAD1, ATAD3A, ATP1A1, ATP2B4, ATP5F1A, ATP5F1B, ATP6V1H, BASP1, BAX, BCLAF1, BIN1, BPNT1, BRCC3, BSG, CACYBP, CALM1, CALM2, CALM3, CAMK2B, CAPG, CAPN5, CAPZB, CAST, CD2AP, CD2BP2, CD55, CD9, CDK5, CDK5RAP3, CEACAM1, CEACAM6, CELF1, CHCHD3, CH…
GO:0050790	regulation of catalytic activity	GO_BiologicalProcess-EBI-UniProt-GOA_17.02.2020_00h00	2.1952e-06	0.00386355	1.33621e-05	8.01728e-05	[3]	Group43	6.29442	186	[ABHD14B, ABI1, ACTB, ADNP, ADRM1, AFDN, AGFG1, AIMP2, AIP, ALDOC, ALPG, ALPP, APPL2, ARFGAP3, ARHGDIA, ARRB1, ASPH, ATP1B1, ATP1B3, ATP2B4, ATP6V1H, BAX, BCAP31, BIN1, BRCC3, CALM1, CALM2, CALM3, CAMK2B, CAND1, CAST, CCDC6, CCS, CCT2, CCT4, CD2BP2, CDC37, CDK5, CDK5RAP3, CEACAM1, CHORDC1, CHTOP, CLPX, COPS8, CTNNB1, CYB5B, DDRGK1, DIABLO, DNAJA3, DNAJB1, DNM2, DPEP1, ECSIT, EEF1A1, EGFR, EIF2AK2…
GO:0009892	negative regulation of metabolic process	GO_BiologicalProcess-EBI-UniProt-GOA_17.02.2020_00h00	1.6077e-05	0.027347	1.33621e-05	8.01728e-05	[4]	Group43	5.94358	217	[ABHD14B, ADNP, AGFG1, ALDOC, ALPP, APPL2, ARRB1, ATP1A1, ATP2B4, BASP1, BAX, BCLAF1, BIN1, CACYBP, CALM1, CALM2, CALM3, CAMK2B, CAPG, CAST, CD2BP2, CDK5, CDK5RAP3, CEACAM1, CELF1, CHCHD3, CHMP1A, CHMP4A, CHMP4B, CHORDC1, CHTOP, CNPY2, COMT, CORO7, CTNNB1, CXADR, DDRGK1, DDX5, DNAJA3, DNAJB1, DPEP1, EDC4, EGFR, EIF2AK2, EIF3A, EIF3E, EIF4A2, EIF4E, EIF4G2, ENO1, ERLIN1, ERLIN2, ETF1, EXOSC10, EXO…
GO:0009893	positive regulation of metabolic process	GO_BiologicalProcess-EBI-UniProt-GOA_17.02.2020_00h00	2.24581e-07	0.000406717	1.33621e-05	8.01728e-05	[4]	Group43	6.01166	268	[ABHD14B, ABI1, ACAT1, ACSL3, ACTA2, ACTB, ACTC1, ACTG1, ACTG2, ACTN4, ADNP, ADRM1, AFDN, AGFG1, AGPAT1, AGR2, AIMP2, AIP, AKAP8L, ALPG, ALPP, ANK3, APPL1, APPL2, ARID3A, ARMCX3, ARRB1, ASPH, ASS1, ATAD1, ATP2B4, BAX, BCAP31, BCLAF1, BPNT1, BRCC3, CACYBP, CALM1, CALM2, CALM3, CAMK2B, CAMK2G, CAND1, CAPG, CAST, CCDC6, CCS, CCT2, CCT3, CCT4, CCT5, CCT6A, CDC37, CDK5, CDK5RAP3, CEBPZ, CHCHD2, CHCHD2…
GO:0048522	positive regulation of cellular process	GO_BiologicalProcess-EBI-UniProt-GOA_17.02.2020_00h00	2.30424e-08	4.25133e-05	1.33621e-05	8.01728e-05	[4]	Group43	5.74981	370	[ABHD14B, ABI1, ACAT1, ACIN1, ACSL3, ACTA2, ACTG1, ACTG2, ACTN4, ADD1, ADNP, ADRM1, AGFG1, AGPAT1, AGR2, AIMP2, AIP, AKAP8L, ALPG, ALPP, ANK3, ANXA13, AP3B1, APPL1, APPL2, ARF6, ARHGDIA, ARID3A, ARMCX3, ARRB1, ASPH, ASS1, ATAD1, ATP1B1, ATP1B3, ATP2B4, ATP5F1A, ATP5F1B, BAIAP2, BAX, BCAP31, BCLAF1, BIN1, BRCC3, CACYBP, CALM1, CALM2, CALM3, CAMK2B, CAMK2G, CAND1, CAPG, CCDC6, CCT2, CCT3, CCT4, CCT…
GO:0051128	regulation of cellular component organization	GO_BiologicalProcess-EBI-UniProt-GOA_17.02.2020_00h00	2.01779e-12	3.88626e-09	1.33621e-05	8.01728e-05	[4]	Group43	7.09926	221	[ABHD14B, ACTG1, ACTN4, ADD1, ADNP, AIP, AKAP8L, ALPP, APPL1, APPL2, ARF6, ARFGAP3, ARFIP1, ARFIP2, ARHGDIA, ARRB1, ASPH, ATAD1, ATAD3A, ATP6V1H, BAIAP2, BAX, BIN1, BSG, CACYBP, CALM1, CALM2, CALM3, CAMK2B, CAMK2G, CAND1, CAPG, CAPZB, CCDC6, CCT2, CCT3, CCT4, CCT5, CCT6A, CD2AP, CDC37, CDH17, CDK11A, CDK11B, CDK5, CEACAM1, CENPV, CFL2, CHMP1A, CHMP2A, CHMP4A, CHMP4B, CHMP5, CHORDC1, CHTOP, CLDN1,…
GO:0010604	positive regulation of macromolecule metabolic process	GO_BiologicalProcess-EBI-UniProt-GOA_17.02.2020_00h00	5.06803e-07	0.000912246	1.33621e-05	8.01728e-05	[5]	Group43	6.04662	249	[ABHD14B, ABI1, ACAT1, ACTA2, ACTB, ACTC1, ACTG1, ACTG2, ACTN4, ADNP, ADRM1, AFDN, AGFG1, AGR2, AIMP2, AIP, AKAP8L, ALPP, ANK3, ARID3A, ARMCX3, ARRB1, ASPH, ATAD1, ATP2B4, BAX, BCAP31, BCLAF1, BPNT1, BRCC3, CACYBP, CALM1, CALM2, CALM3, CAMK2B, CAMK2G, CAND1, CAPG, CAST, CCDC6, CCT2, CCT3, CCT4, CCT5, CCT6A, CDK5, CDK5RAP3, CEBPZ, CHCHD2, CHCHD2P9, CHORDC1, CHTOP, CLPX, CNPY2, COPS8, CORO7, CSNK1A…
GO:0031325	positive regulation of cellular metabolic process	GO_BiologicalProcess-EBI-UniProt-GOA_17.02.2020_00h00	9.74102e-06	0.0166864	1.33621e-05	8.01728e-05	[5]	Group43	5.86667	242	[ABHD14B, ABI1, ACAT1, ACSL3, ACTA2, ACTG1, ACTG2, ACTN4, ADNP, ADRM1, AGFG1, AGPAT1, AIMP2, AIP, AKAP8L, ALPG, ALPP, APPL1, ARID3A, ARMCX3, ARRB1, ASPH, ASS1, ATAD1, ATP2B4, BAX, BCAP31, BCLAF1, BRCC3, CACYBP, CALM1, CALM2, CALM3, CAMK2B, CAMK2G, CAND1, CCDC6, CCT2, CCT3, CCT4, CCT5, CCT6A, CDC37, CDK5, CDK5RAP3, CEBPZ, CHCHD2, CHCHD2P9, CHORDC1, CHTOP, CLPX, CNPY2, COMT, COPS8, CORO7, CSNK1A1, …
GO:0034248	regulation of cellular amide metabolic process	GO_BiologicalProcess-EBI-UniProt-GOA_17.02.2020_00h00	2.65686e-15	5.17822e-12	1.33621e-05	8.01728e-05	[5]	Group43	12.4789	74	[ABCF1, ALPP, BIN1, BSG, CALM2, CALM3, CELF1, DDX39B, EEF1A1, EEF1A1P5, EEF1B2, EEF1D, EEF2, EIF2AK2, EIF2B1, EIF2S2, EIF3A, EIF3E, EIF3H, EIF3J, EIF3M, EIF4A1, EIF4A2, EIF4B, EIF4E, EIF4G2, EIF5, ETF1, FMR1, FXR2, GFM2, IGF2BP1, IGF2BP2, IGF2BP3, ITGA2, KHDRBS1, KHSRP, LARP1, LARP4B, MAPK1, MAPK3, MATR3, MTIF2, NCL, NPM1, PAPSS2, PDP1, PICALM, PKP3, PRKAA1, PRKCD, PRKCSH, PYM1, RBM39, RBM4, RBM4…
GO:0051173	positive regulation of nitrogen compound metabolic process	GO_BiologicalProcess-EBI-UniProt-GOA_17.02.2020_00h00	8.16872e-06	0.0140584	1.33621e-05	8.01728e-05	[5]	Group43	5.91988	232	[ABHD14B, ABI1, ACAT1, ACSL3, ACTA2, ACTG1, ACTG2, ACTN4, ADNP, ADRM1, AGFG1, AIMP2, AIP, AKAP8L, ALPG, ALPP, ARID3A, ARMCX3, ARRB1, ASPH, ASS1, ATP2B4, BAX, BCAP31, BCLAF1, BRCC3, CACYBP, CALM1, CALM2, CALM3, CAMK2B, CAMK2G, CAND1, CCDC6, CCT2, CCT3, CCT4, CCT5, CCT6A, CDK5, CDK5RAP3, CEBPZ, CHCHD2, CHCHD2P9, CHORDC1, CHTOP, CLPX, CNPY2, COMT, COPS8, CORO7, CSNK1A1, CTNNB1, CUL4B, CXADR, DDRGK1,…
GO:0051246	regulation of protein metabolic process	GO_BiologicalProcess-EBI-UniProt-GOA_17.02.2020_00h00	1.27894e-08	2.36603e-05	1.33621e-05	8.01728e-05	[5]	Group43	6.43972	227	[ABCF1, ABHD14B, ABI1, ACAT1, ACTB, ADNP, ADRM1, AGFG1, AIMP2, AIP, AKAP8L, ALPP, APPL2, ARRB1, ASPH, ATP2B4, BAX, BCAP31, BIN1, CALM1, CALM2, CALM3, CAMK2B, CAST, CCDC6, CDC37, CDK5, CDK5RAP3, CEACAM1, CELF1, CHORDC1, CHTOP, CLPX, CNPY2, COPS8, CSNK1A1, CTNNB1, CUL4B, CXADR, DDRGK1, DDX39B, DIABLO, DPEP1, EEF1A1, EEF1A1P5, EEF1B2, EEF1D, EEF2, EGFR, EHD4, EIF2AK2, EIF2B1, EIF2S2, EIF3A, EIF3E, E…
GO:0032268	regulation of cellular protein metabolic process	GO_BiologicalProcess-EBI-UniProt-GOA_17.02.2020_00h00	3.33973e-09	6.23194e-06	1.33621e-05	8.01728e-05	[5, 6]	Group43	6.59043	219	[ABCF1, ABHD14B, ABI1, ACTB, ADNP, ADRM1, AGFG1, AIMP2, AIP, AKAP8L, ALPP, APPL2, ARRB1, ASPH, ATP2B4, BAX, BCAP31, BIN1, CALM1, CALM2, CALM3, CAMK2B, CAST, CCDC6, CDC37, CDK5, CDK5RAP3, CEACAM1, CELF1, CHORDC1, CHTOP, CLPX, COPS8, CSNK1A1, CTNNB1, CXADR, DDRGK1, DDX39B, DIABLO, DPEP1, EEF1A1, EEF1A1P5, EEF1B2, EEF1D, EEF2, EGFR, EHD4, EIF2AK2, EIF2B1, EIF2S2, EIF3A, EIF3E, EIF3H, EIF3J, EIF3M, E…
GO:0010628	positive regulation of gene expression	GO_BiologicalProcess-EBI-UniProt-GOA_17.02.2020_00h00	1.11039e-05	0.0189765	1.33621e-05	8.01728e-05	[6]	Group43	6.33971	159	[ABHD14B, ACTA2, ACTB, ACTC1, ACTG1, ACTG2, AFDN, AGFG1, AGR2, AKAP8L, ALPP, ANK3, ARID3A, ARMCX3, ARRB1, BCLAF1, BPNT1, CACYBP, CALM2, CALM3, CAMK2G, CAND1, CAPG, CAST, CCDC6, CDK5RAP3, CEBPZ, CHCHD2, CHCHD2P9, CORO7, CSRP1, CTNNB1, CXADR, DDRGK1, DDX21, DDX39B, DDX5, DEK, DNM2, EEF2, EGFR, EIF3A, EIF3E, EIF4A2, EIF4E, EIF4G2, ENO1, EPCAM, ERLIN1, ERLIN2, EZR, FAM98B, FMR1, FUBP3, FUS, FXR2, GAM…
GO:0051248	negative regulation of protein metabolic process	GO_BiologicalProcess-EBI-UniProt-GOA_17.02.2020_00h00	5.29382e-07	0.000951299	1.33621e-05	8.01728e-05	[6]	Group43	7.3844	107	[ABHD14B, ALPP, APPL2, ARRB1, ATP2B4, BAX, BIN1, CALM1, CALM2, CALM3, CAMK2B, CAST, CDK5, CDK5RAP3, CEACAM1, CELF1, CHORDC1, CHTOP, CTNNB1, DDRGK1, DPEP1, EGFR, EIF2AK2, EIF3A, EIF3E, EIF4A2, EIF4E, ETF1, EZR, FKBP8, FMR1, FXR2, GAMT, GPRC5A, HINT2, HSP90AB1, IGF2BP1, IGF2BP2, IGF2BP3, ILK, ITGAV, KDM1A, KHSRP, LARP1, LEMD2, LGALS3, LLGL2, MAPK1, MMAB, MTTP, MYO1A, MYO1C, NCL, NDRG1, NNT, NPM1, N…
GO:0032269	negative regulation of cellular protein metabolic process	GO_BiologicalProcess-EBI-UniProt-GOA_17.02.2020_00h00	7.23233e-07	0.00129169	1.33621e-05	8.01728e-05	[6, 7]	Group43	7.45614	102	[ABHD14B, ALPP, APPL2, ARRB1, ATP2B4, BAX, BIN1, CALM1, CALM2, CALM3, CAMK2B, CAST, CDK5, CDK5RAP3, CEACAM1, CELF1, CHORDC1, CHTOP, CTNNB1, DDRGK1, DPEP1, EIF2AK2, EIF3A, EIF3E, EIF4A2, EIF4E, ETF1, EZR, FKBP8, FMR1, FXR2, GAMT, GPRC5A, HINT2, HSP90AB1, IGF2BP1, IGF2BP2, IGF2BP3, ILK, KDM1A, KHSRP, LARP1, LEMD2, LGALS3, MAPK1, MMAB, MTTP, MYO1A, NCL, NDRG1, NNT, NPM1, NUP62, NXN, OCLN, OTUB1, PAK…
GO:0032270	positive regulation of cellular protein metabolic process	GO_BiologicalProcess-EBI-UniProt-GOA_17.02.2020_00h00	2.90871e-05	0.0486045	1.33621e-05	8.01728e-05	[6, 7]	Group43	6.47059	132	[ABHD14B, ABI1, ADNP, ADRM1, AGFG1, AIMP2, AIP, AKAP8L, ALPP, ARRB1, ASPH, ATP2B4, BAX, BCAP31, CALM1, CALM2, CALM3, CAMK2B, CCDC6, CDK5, CDK5RAP3, CHORDC1, CHTOP, CLPX, COPS8, CSNK1A1, CTNNB1, DDRGK1, DDX39B, DIABLO, EEF2, EGFR, EHD4, EIF2AK2, EIF3A, EIF3E, EIF4A2, EIF4E, EIF4G2, ENO1, ETFA, EZR, FAM162A, FLOT1, FMR1, FXR2, GAMT, GFER, GNL3, GPRC5A, GSDME, HAX1, HSP90AA1, HSP90AB1, HSPD1, IGF2BP…
GO:0031400	negative regulation of protein modification process	GO_BiologicalProcess-EBI-UniProt-GOA_17.02.2020_00h00	2.94243e-06	0.00515514	1.33621e-05	8.01728e-05	[7, 8]	Group43	8.20073	67	[ABHD14B, ALPP, ARRB1, ATP2B4, BAX, CALM1, CALM2, CALM3, CAMK2B, CDK5, CDK5RAP3, CEACAM1, CHORDC1, CHTOP, CTNNB1, EIF3A, EIF4A2, EIF4E, EZR, FKBP8, GAMT, GPRC5A, HINT2, ILK, KDM1A, LEMD2, LGALS3, MAPK1, MTTP, NDRG1, NNT, NPM1, NUP62, NXN, OCLN, OTUB1, PAK1, PAK2, PAPSS2, PDCD6IP, PHB, PICALM, PNKP, PPP2R1A, PPP5C, PRKAA1, PRKAR2A, PRKCD, PSEN1, PSMG1, RPL11, RPL17, RPL5, RPS3, RPS7, RTRAF, SFN, S…
GO:0031647	regulation of protein stability	GO_BiologicalProcess-EBI-UniProt-GOA_17.02.2020_00h00	1.30478e-05	0.0222205	3.38441e-15	1.28608e-13	[3]	Group44	9.86667	37	[ASPH, ATP1B1, ATP1B3, CCT2, CCT3, CCT4, CCT5, CCT6A, CDC37, CHORDC1, CTNND1, EFHD2, EIF4E, FLOT1, HSP90AA1, HSP90AB1, HSP90AB2P, HSPD1, LMNA, LONP1, LSS, MAPK1, NAPG, PAG1, PDCD10, PHB, PHB2, PRKCD, PRKRA, RPL11, RPL17, RPL5, RPS7, SRC, SUGT1, TCOF1, TCP1]
GO:1904872	regulation of telomerase RNA localization to Cajal body	GO_BiologicalProcess-EBI-UniProt-GOA_17.02.2020_00h00	3.76945e-07	0.000680385	3.38441e-15	1.28608e-13	[4]	Group44	39.1304	9	[CCT2, CCT3, CCT4, CCT5, CCT6A, EXOSC10, RUVBL1, RUVBL2, TCP1]
GO:1904874	positive regulation of telomerase RNA localization to Cajal body	GO_BiologicalProcess-EBI-UniProt-GOA_17.02.2020_00h00	5.29202e-07	0.000951506	3.38441e-15	1.28608e-13	[4, 5]	Group44	44.4444	8	[CCT2, CCT3, CCT4, CCT5, CCT6A, RUVBL1, RUVBL2, TCP1]
GO:1903827	regulation of cellular protein localization	GO_BiologicalProcess-EBI-UniProt-GOA_17.02.2020_00h00	1.1066e-14	2.15344e-11	3.38441e-15	1.28608e-13	[5]	Group44	11.6046	81	[ABHD14B, ACSL3, ACTB, AGR2, AKAP8L, ANK3, ANXA13, APPL1, ARF6, ATAD1, ATP2B4, BCAP31, BSG, CALM2, CALM3, CCT2, CCT3, CCT4, CCT5, CCT6A, CD2AP, CDK5, CDK5RAP3, CHORDC1, CTNNB1, DDRGK1, EGFR, EPB41L2, EZR, GNL3, HAX1, HSP90AA1, HSP90AB1, JUP, KDM1A, KIF5B, LGALS3, LMAN1, LMNA, MAPK1, MARCKSL1, MAVS, MESD, MISP, MYO1C, NPTN, NRBP1, NSUN2, NUCB1, NUP58, NUP62, PAK1, PDCD10, PICALM, PLS1, PRKAA1, PRK…
GO:1903829	positive regulation of cellular protein localization	GO_BiologicalProcess-EBI-UniProt-GOA_17.02.2020_00h00	1.75267e-13	3.39843e-10	3.38441e-15	1.28608e-13	[4, 6]	Group44	13.5071	57	[ABHD14B, ACSL3, AGR2, ANK3, ANXA13, ARF6, ATP2B4, BCAP31, CCT2, CCT3, CCT4, CCT5, CCT6A, CD2AP, CDK5, CDK5RAP3, CHORDC1, DDRGK1, EGFR, EPB41L2, EZR, GNL3, HSP90AB1, JUP, KIF5B, LGALS3, MAPK1, MAVS, MESD, MYO1C, NPTN, NUP62, PAK1, PDCD10, PLS1, PRKAA1, PRKACA, PRKCA, PRKCD, PSEN1, RAN, RHOG, SAE1, SF1, SFN, SORBS1, SQSTM1, SRC, STOM, STX3, STX4, TCOF1, TCP1, TRIM28, TSG101, VIL1, YWHAG]
GO:1904951	positive regulation of establishment of protein localization	GO_BiologicalProcess-EBI-UniProt-GOA_17.02.2020_00h00	2.44035e-05	0.0409979	3.38441e-15	1.28608e-13	[4, 6]	Group44	8.35962	53	[ABHD14B, ACSL3, ANK3, ANXA13, ARF6, ARRB1, BCAP31, CCT2, CCT3, CCT4, CCT5, CCT6A, CD2AP, CDK5, CHORDC1, EGFR, EZR, HSP90AB1, HSPD1, JUP, KIF5B, MAPK1, MAPK3, MAVS, MTTP, MYO18A, MYO1C, PAK1, PDCD10, PDHX, PICALM, PRKAA1, PRKACA, PRKCA, PRKCD, PSEN1, PTPN23, RAC1, RAN, SAE1, SEC24A, SF1, SFN, SIRT3, SLC25A4, SRC, STOM, STX4, SULT2A1, TCP1, TRIM28, TSG101, YWHAG]
GO:0051052	regulation of DNA metabolic process	GO_BiologicalProcess-EBI-UniProt-GOA_17.02.2020_00h00	3.2258e-07	0.000582579	3.38441e-15	1.28608e-13	[5, 6]	Group44	10.0209	48	[ALPP, BAX, BRCC3, CCT2, CCT3, CCT4, CCT5, CCT6A, CTNNB1, DDX39B, DEK, DPEP1, EGFR, EXOSC10, EXOSC6, FUS, GAMT, GNL3, H1-10, H1-2, H1-3, H1-4, HNRNPU, HSP90AA1, HSP90AB1, KDM1A, MAPK1, MAPK3, MECP2, MMAB, MSH2, NIBAN2, NPM1, OTUB1, PNKP, PPP4R2, PRKCD, RFC4, RPS3, SRC, TCP1, THOC1, TIGAR, TRIM28, UBE2V1, WASF2, XRCC1, ZMPSTE24]
GO:0046822	regulation of nucleocytoplasmic transport	GO_BiologicalProcess-EBI-UniProt-GOA_17.02.2020_00h00	3.73777e-06	0.0065112	3.38441e-15	1.28608e-13	[6]	Group44	14.1892	21	[AKAP8L, CDK5, CHORDC1, HSP90AB1, JUP, KHDRBS1, MAPK1, MAVS, NSUN2, NUP58, NUP62, PRKACA, PRKCA, PRKCD, PSEN1, RAN, RANGAP1, RBM4, SFN, TRIM28, VAC14]
GO:1900180	regulation of protein localization to nucleus	GO_BiologicalProcess-EBI-UniProt-GOA_17.02.2020_00h00	3.37568e-06	0.00589394	3.38441e-15	1.28608e-13	[6]	Group44	13.8365	22	[CCT2, CCT3, CCT4, CCT5, CCT6A, CD2AP, CDK5RAP3, CHORDC1, HSP90AB1, JUP, LMNA, MAPK1, MAVS, NUP58, NUP62, PRKCD, PSEN1, RAN, SRC, TCOF1, TCP1, TRIM28]
GO:1900182	positive regulation of protein localization to nucleus	GO_BiologicalProcess-EBI-UniProt-GOA_17.02.2020_00h00	8.68871e-07	0.0015492	3.38441e-15	1.28608e-13	[5, 7]	Group44	17.4757	18	[CCT2, CCT3, CCT4, CCT5, CCT6A, CD2AP, CDK5RAP3, HSP90AB1, JUP, MAPK1, MAVS, PRKCD, PSEN1, RAN, SRC, TCOF1, TCP1, TRIM28]
GO:1904814	regulation of protein localization to chromosome, telomeric region	GO_BiologicalProcess-EBI-UniProt-GOA_17.02.2020_00h00	1.84777e-05	0.0313198	3.38441e-15	1.28608e-13	[6]	Group44	35	7	[CCT2, CCT3, CCT4, CCT5, CCT6A, GNL3, TCP1]
GO:1904816	positive regulation of protein localization to chromosome, telomeric region	GO_BiologicalProcess-EBI-UniProt-GOA_17.02.2020_00h00	3.2018e-06	0.00560636	3.38441e-15	1.28608e-13	[5, 7]	Group44	43.75	7	[CCT2, CCT3, CCT4, CCT5, CCT6A, GNL3, TCP1]
GO:1904356	regulation of telomere maintenance via telomere lengthening	GO_BiologicalProcess-EBI-UniProt-GOA_17.02.2020_00h00	1.91684e-05	0.0324329	3.38441e-15	1.28608e-13	[4, 7, 8]	Group44	16.129	15	[ALPP, CCT2, CCT3, CCT4, CCT5, CCT6A, CTNNB1, EXOSC10, HNRNPU, MAPK1, MAPK3, MMAB, PNKP, SRC, TCP1]
GO:0051054	positive regulation of DNA metabolic process	GO_BiologicalProcess-EBI-UniProt-GOA_17.02.2020_00h00	1.67497e-06	0.002958	3.38441e-15	1.28608e-13	[6, 7]	Group44	11.6541	31	[BAX, BRCC3, CCT2, CCT3, CCT4, CCT5, CCT6A, CTNNB1, DDX39B, EGFR, EXOSC6, FUS, GAMT, GNL3, HSP90AA1, HSP90AB1, MAPK1, MAPK3, MECP2, MMAB, MSH2, PNKP, PRKCD, RFC4, RPS3, SRC, TCP1, TIGAR, TRIM28, WASF2, XRCC1]
GO:1904851	positive regulation of establishment of protein localization to telomere	GO_BiologicalProcess-EBI-UniProt-GOA_17.02.2020_00h00	6.46985e-06	0.0111928	3.38441e-15	1.28608e-13	[5, 6, 7, 8]	Group44	50	6	[CCT2, CCT3, CCT4, CCT5, CCT6A, TCP1]
GO:2000278	regulation of DNA biosynthetic process	GO_BiologicalProcess-EBI-UniProt-GOA_17.02.2020_00h00	2.98106e-05	0.0497837	3.38441e-15	1.28608e-13	[6, 7]	Group44	12.426	21	[ALPP, CCT2, CCT3, CCT4, CCT5, CCT6A, CTNNB1, DDX39B, EXOSC10, GAMT, HNRNPU, HSP90AA1, HSP90AB1, MAPK1, MAPK3, MMAB, NIBAN2, PNKP, RFC4, SRC, TCP1]
GO:1904869	regulation of protein localization to Cajal body	GO_BiologicalProcess-EBI-UniProt-GOA_17.02.2020_00h00	3.36511e-06	0.00587886	3.38441e-15	1.28608e-13	[7]	Group44	54.5455	6	[CCT2, CCT3, CCT4, CCT5, CCT6A, TCP1]
GO:1904871	positive regulation of protein localization to Cajal body	GO_BiologicalProcess-EBI-UniProt-GOA_17.02.2020_00h00	3.36511e-06	0.00587886	3.38441e-15	1.28608e-13	[6, 8]	Group44	54.5455	6	[CCT2, CCT3, CCT4, CCT5, CCT6A, TCP1]
GO:0032210	regulation of telomere maintenance via telomerase	GO_BiologicalProcess-EBI-UniProt-GOA_17.02.2020_00h00	6.19783e-06	0.0107284	3.38441e-15	1.28608e-13	[5, 7, 8, 9]	Group44	17.6471	15	[ALPP, CCT2, CCT3, CCT4, CCT5, CCT6A, CTNNB1, EXOSC10, HNRNPU, MAPK1, MAPK3, MMAB, PNKP, SRC, TCP1]
GO:1904358	positive regulation of telomere maintenance via telomere lengthening	GO_BiologicalProcess-EBI-UniProt-GOA_17.02.2020_00h00	2.19687e-05	0.0370172	3.38441e-15	1.28608e-13	[5, 8, 9]	Group44	20.7547	11	[CCT2, CCT3, CCT4, CCT5, CCT6A, CTNNB1, MAPK1, MAPK3, MMAB, PNKP, TCP1]
GO:2000573	positive regulation of DNA biosynthetic process	GO_BiologicalProcess-EBI-UniProt-GOA_17.02.2020_00h00	2.24124e-06	0.00394235	3.38441e-15	1.28608e-13	[7, 8]	Group44	17.1717	17	[CCT2, CCT3, CCT4, CCT5, CCT6A, CTNNB1, DDX39B, GAMT, HSP90AA1, HSP90AB1, MAPK1, MAPK3, MMAB, PNKP, RFC4, SRC, TCP1]
GO:0032212	positive regulation of telomere maintenance via telomerase	GO_BiologicalProcess-EBI-UniProt-GOA_17.02.2020_00h00	1.21999e-05	0.020813	3.38441e-15	1.28608e-13	[6, 8, 9, 10]	Group44	22	11	[CCT2, CCT3, CCT4, CCT5, CCT6A, CTNNB1, MAPK1, MAPK3, MMAB, PNKP, TCP1]
GO:0032879	regulation of localization	GO_BiologicalProcess-EBI-UniProt-GOA_17.02.2020_00h00	6.03585e-08	0.000110456	2.3249e-11	7.20718e-10	[3]	Group45	6.36813	219	[ABHD14B, ACSL3, ACTB, ACTG1, ACTN4, AFDN, AGFG1, AGR2, AHNAK, AKAP8L, ALPP, ANK3, ANXA13, APPL1, APPL2, ARF6, ARFGAP3, ARFIP1, ARHGDIA, ARRB1, ATAD1, ATP1A1, ATP1B1, ATP1B3, ATP2B4, ATP5F1A, ATP5F1B, BAX, BCAP31, BIN1, BSG, CACYBP, CALM1, CALM2, CALM3, CAMK2B, CAMK2G, CCDC6, CCT2, CCT3, CCT4, CCT5, CCT6A, CD2AP, CD9, CDK5, CDK5RAP3, CEACAM1, CEACAM6, CHMP2A, CHORDC1, CHTOP, CLDN1, COMT, CSRP1, C…
GO:0032880	regulation of protein localization	GO_BiologicalProcess-EBI-UniProt-GOA_17.02.2020_00h00	2.61156e-10	4.93323e-07	2.3249e-11	7.20718e-10	[4]	Group45	8.37658	113	[ABHD14B, ACSL3, ACTB, AFDN, AGR2, AKAP8L, ANK3, ANXA13, APPL1, ARF6, ARFIP1, ARHGDIA, ARRB1, ATAD1, ATP2B4, BCAP31, BSG, CALM2, CALM3, CCT2, CCT3, CCT4, CCT5, CCT6A, CD2AP, CDK5, CDK5RAP3, CHORDC1, CSRP1, CTNNB1, DDRGK1, EGFR, EPB41L2, EPB41L5, EZR, GNAS, GNL3, HADHA, HAX1, HMGN3, HSP90AA1, HSP90AB1, HSPD1, JUP, KDM1A, KIF5B, LGALS3, LLGL2, LMAN1, LMNA, MAPK1, MAPK3, MARCKSL1, MAVS, MESD, MISP, …
GO:0051049	regulation of transport	GO_BiologicalProcess-EBI-UniProt-GOA_17.02.2020_00h00	1.68092e-05	0.0285421	2.3249e-11	7.20718e-10	[4]	Group45	6.37484	150	[ABHD14B, ACSL3, ACTB, ACTG1, ACTN4, AGFG1, AHNAK, AKAP8L, ALPP, ANK3, ANXA13, APPL1, APPL2, ARF6, ARFGAP3, ARFIP1, ARRB1, ATAD1, ATP1A1, ATP1B1, ATP1B3, ATP2B4, ATP5F1A, BAX, BCAP31, BIN1, BSG, CALM1, CALM2, CALM3, CAMK2B, CAMK2G, CCT6A, CD2AP, CDK5, CEACAM1, CHMP2A, CHORDC1, COMT, CSRP1, CTNNB1, DNM2, DPYSL2, EGFR, EHD1, EHD4, EIF4G2, EZR, FDPS, FLOT1, FMR1, GAMT, GNAS, GPR89A, GPR89B, GSTO1, H…
GO:0051128	regulation of cellular component organization	GO_BiologicalProcess-EBI-UniProt-GOA_17.02.2020_00h00	2.01779e-12	3.88626e-09	2.3249e-11	7.20718e-10	[4]	Group45	7.09926	221	[ABHD14B, ACTG1, ACTN4, ADD1, ADNP, AIP, AKAP8L, ALPP, APPL1, APPL2, ARF6, ARFGAP3, ARFIP1, ARFIP2, ARHGDIA, ARRB1, ASPH, ATAD1, ATAD3A, ATP6V1H, BAIAP2, BAX, BIN1, BSG, CACYBP, CALM1, CALM2, CALM3, CAMK2B, CAMK2G, CAND1, CAPG, CAPZB, CCDC6, CCT2, CCT3, CCT4, CCT5, CCT6A, CD2AP, CDC37, CDH17, CDK11A, CDK11B, CDK5, CEACAM1, CENPV, CFL2, CHMP1A, CHMP2A, CHMP4A, CHMP4B, CHMP5, CHORDC1, CHTOP, CLDN1,…
GO:0060341	regulation of cellular localization	GO_BiologicalProcess-EBI-UniProt-GOA_17.02.2020_00h00	2.49544e-15	4.8661e-12	2.3249e-11	7.20718e-10	[4]	Group45	10.2099	107	[ABHD14B, ACSL3, ACTB, AGR2, AKAP8L, ANK3, ANXA13, APPL1, ARF6, ARFIP1, ARRB1, ATAD1, ATP2B4, BAX, BCAP31, BSG, CALM1, CALM2, CALM3, CAMK2B, CCT2, CCT3, CCT4, CCT5, CCT6A, CD2AP, CDK5, CDK5RAP3, CHORDC1, CTNNB1, DDRGK1, EGFR, EHD1, EPB41L2, ETF1, EZR, FDPS, GNL3, GSTO1, HAX1, HMGN3, HNRNPU, HSP90AA1, HSP90AB1, JUP, KDM1A, KHDRBS1, KIF5B, LGALS3, LMAN1, LMNA, MAP2K2, MAPK1, MAPK3, MARCKSL1, MAVS, …
GO:0051050	positive regulation of transport	GO_BiologicalProcess-EBI-UniProt-GOA_17.02.2020_00h00	2.17702e-05	0.0367263	2.3249e-11	7.20718e-10	[4, 5]	Group45	7.12074	92	[ABHD14B, ACSL3, ACTB, ACTN4, ALPP, ANK3, ANXA13, APPL1, APPL2, ARF6, ARRB1, ATAD1, ATP1B1, ATP1B3, BAX, BCAP31, CALM1, CALM2, CALM3, CAMK2B, CCT6A, CD2AP, CDK5, CHMP2A, CHORDC1, DNM2, DPYSL2, EGFR, EHD1, EIF4G2, EZR, FLOT1, FMR1, GAMT, GSTO1, HGS, HSP90AB1, HSPD1, ITGA2, ITGAV, JUP, KHDRBS1, KIF5B, LGALS3, MAPK1, MAPK3, MAVS, MTTP, MYO18A, MYO1C, OCLN, PAK1, PAPSS2, PDCD10, PDCD6IP, PDHX, PICALM…
GO:0060627	regulation of vesicle-mediated transport	GO_BiologicalProcess-EBI-UniProt-GOA_17.02.2020_00h00	3.89965e-08	7.17145e-05	2.3249e-11	7.20718e-10	[4, 5]	Group45	9.39306	65	[ACSL3, ACTN4, ALPP, ANXA13, APPL1, APPL2, ARF6, ARFGAP3, ARFIP1, ARRB1, ATAD1, BIN1, CALM1, CALM2, CALM3, CD2AP, CDK5, CEACAM1, CHMP2A, DNM2, EHD1, EHD4, EZR, FDPS, FLOT1, FMR1, GAMT, HGS, ITGA2, ITGAV, KIF5B, LGALS3, MAP2K2, MAPK1, MAPK3, MTTP, MYO18A, PACSIN2, PACSIN3, PAPSS2, PDCD6IP, PICALM, PPP5C, PRKAA1, PRKCSH, PTPN23, RAB10, RAB25, RAB8A, RAB9A, RAC1, RALA, RALB, SCFD1, SH3GL1, SNAPIN, S…
GO:0032386	regulation of intracellular transport	GO_BiologicalProcess-EBI-UniProt-GOA_17.02.2020_00h00	5.97438e-07	0.0010724	2.3249e-11	7.20718e-10	[5]	Group45	10.0218	46	[ABHD14B, AKAP8L, ANK3, ARFIP1, BCAP31, CDK5, CHORDC1, EHD1, EZR, FDPS, HAX1, HSP90AB1, JUP, KHDRBS1, KIF5B, LMAN1, MAP2K2, MAPK1, MAPK3, MAVS, MYO1C, NSUN2, NUCB1, NUP58, NUP62, PAK1, PAPSS2, PDCD10, PRKAA1, PRKACA, PRKCA, PRKCD, PSEN1, PTPN23, RAN, RANGAP1, RBM4, SAE1, SCFD1, SFN, SNX4, SRC, STOM, TRIM28, UBAC2, VAC14]
GO:0070201	regulation of establishment of protein localization	GO_BiologicalProcess-EBI-UniProt-GOA_17.02.2020_00h00	2.92991e-06	0.00513613	2.3249e-11	7.20718e-10	[5]	Group45	7.77559	79	[ABHD14B, ACSL3, AKAP8L, ANK3, ANXA13, ARF6, ARFIP1, ARRB1, ATAD1, BCAP31, BSG, CCT2, CCT3, CCT4, CCT5, CCT6A, CD2AP, CDK5, CHORDC1, CSRP1, EGFR, EPB41L5, EZR, GNAS, HADHA, HAX1, HMGN3, HSP90AB1, HSPD1, JUP, KIF5B, LLGL2, LMAN1, MAPK1, MAPK3, MAVS, MTTP, MYO18A, MYO1C, NDUFAF2, NSUN2, NUCB1, NUP58, NUP62, PAK1, PDCD10, PDHX, PICALM, PRKAA1, PRKACA, PRKCA, PRKCD, PSEN1, PTPN23, RAB8A, RAC1, RAN, R…
GO:1903827	regulation of cellular protein localization	GO_BiologicalProcess-EBI-UniProt-GOA_17.02.2020_00h00	1.1066e-14	2.15344e-11	2.3249e-11	7.20718e-10	[5]	Group45	11.6046	81	[ABHD14B, ACSL3, ACTB, AGR2, AKAP8L, ANK3, ANXA13, APPL1, ARF6, ATAD1, ATP2B4, BCAP31, BSG, CALM2, CALM3, CCT2, CCT3, CCT4, CCT5, CCT6A, CD2AP, CDK5, CDK5RAP3, CHORDC1, CTNNB1, DDRGK1, EGFR, EPB41L2, EZR, GNL3, HAX1, HSP90AA1, HSP90AB1, JUP, KDM1A, KIF5B, LGALS3, LMAN1, LMNA, MAPK1, MARCKSL1, MAVS, MESD, MISP, MYO1C, NPTN, NRBP1, NSUN2, NUCB1, NUP58, NUP62, PAK1, PDCD10, PICALM, PLS1, PRKAA1, PRK…
GO:1903829	positive regulation of cellular protein localization	GO_BiologicalProcess-EBI-UniProt-GOA_17.02.2020_00h00	1.75267e-13	3.39843e-10	2.3249e-11	7.20718e-10	[4, 6]	Group45	13.5071	57	[ABHD14B, ACSL3, AGR2, ANK3, ANXA13, ARF6, ATP2B4, BCAP31, CCT2, CCT3, CCT4, CCT5, CCT6A, CD2AP, CDK5, CDK5RAP3, CHORDC1, DDRGK1, EGFR, EPB41L2, EZR, GNL3, HSP90AB1, JUP, KIF5B, LGALS3, MAPK1, MAVS, MESD, MYO1C, NPTN, NUP62, PAK1, PDCD10, PLS1, PRKAA1, PRKACA, PRKCA, PRKCD, PSEN1, RAN, RHOG, SAE1, SF1, SFN, SORBS1, SQSTM1, SRC, STOM, STX3, STX4, TCOF1, TCP1, TRIM28, TSG101, VIL1, YWHAG]
GO:1904951	positive regulation of establishment of protein localization	GO_BiologicalProcess-EBI-UniProt-GOA_17.02.2020_00h00	2.44035e-05	0.0409979	2.3249e-11	7.20718e-10	[4, 6]	Group45	8.35962	53	[ABHD14B, ACSL3, ANK3, ANXA13, ARF6, ARRB1, BCAP31, CCT2, CCT3, CCT4, CCT5, CCT6A, CD2AP, CDK5, CHORDC1, EGFR, EZR, HSP90AB1, HSPD1, JUP, KIF5B, MAPK1, MAPK3, MAVS, MTTP, MYO18A, MYO1C, PAK1, PDCD10, PDHX, PICALM, PRKAA1, PRKACA, PRKCA, PRKCD, PSEN1, PTPN23, RAC1, RAN, SAE1, SEC24A, SF1, SFN, SIRT3, SLC25A4, SRC, STOM, STX4, SULT2A1, TCP1, TRIM28, TSG101, YWHAG]
GO:0032388	positive regulation of intracellular transport	GO_BiologicalProcess-EBI-UniProt-GOA_17.02.2020_00h00	2.72309e-05	0.0455572	2.3249e-11	7.20718e-10	[5, 6]	Group45	10.5455	29	[ABHD14B, ANK3, BCAP31, CDK5, CHORDC1, EHD1, EZR, HSP90AB1, JUP, KHDRBS1, KIF5B, MAPK1, MAVS, MYO1C, PAK1, PAPSS2, PDCD10, PRKAA1, PRKACA, PRKCA, PRKCD, PSEN1, PTPN23, RAN, SAE1, SFN, SNX4, STOM, TRIM28]
GO:0046822	regulation of nucleocytoplasmic transport	GO_BiologicalProcess-EBI-UniProt-GOA_17.02.2020_00h00	3.73777e-06	0.0065112	2.3249e-11	7.20718e-10	[6]	Group45	14.1892	21	[AKAP8L, CDK5, CHORDC1, HSP90AB1, JUP, KHDRBS1, MAPK1, MAVS, NSUN2, NUP58, NUP62, PRKACA, PRKCA, PRKCD, PSEN1, RAN, RANGAP1, RBM4, SFN, TRIM28, VAC14]
GO:1900180	regulation of protein localization to nucleus	GO_BiologicalProcess-EBI-UniProt-GOA_17.02.2020_00h00	3.37568e-06	0.00589394	2.3249e-11	7.20718e-10	[6]	Group45	13.8365	22	[CCT2, CCT3, CCT4, CCT5, CCT6A, CD2AP, CDK5RAP3, CHORDC1, HSP90AB1, JUP, LMNA, MAPK1, MAVS, NUP58, NUP62, PRKCD, PSEN1, RAN, SRC, TCOF1, TCP1, TRIM28]
GO:1900182	positive regulation of protein localization to nucleus	GO_BiologicalProcess-EBI-UniProt-GOA_17.02.2020_00h00	8.68871e-07	0.0015492	2.3249e-11	7.20718e-10	[5, 7]	Group45	17.4757	18	[CCT2, CCT3, CCT4, CCT5, CCT6A, CD2AP, CDK5RAP3, HSP90AB1, JUP, MAPK1, MAVS, PRKCD, PSEN1, RAN, SRC, TCOF1, TCP1, TRIM28]
GO:1904375	regulation of protein localization to cell periphery	GO_BiologicalProcess-EBI-UniProt-GOA_17.02.2020_00h00	8.18909e-10	1.53955e-06	2.3249e-11	7.20718e-10	[6]	Group45	17.5	28	[ABHD14B, ACSL3, ACTB, AGR2, ANXA13, APPL1, ARF6, ATP2B4, CALM2, CALM3, CDK5, EGFR, EPB41L2, EZR, KIF5B, LGALS3, MAPK1, MARCKSL1, MISP, NRBP1, PICALM, PLS1, RHOG, SORBS1, SQSTM1, STX3, STX4, VIL1]
GO:1904377	positive regulation of protein localization to cell periphery	GO_BiologicalProcess-EBI-UniProt-GOA_17.02.2020_00h00	8.31591e-09	1.54343e-05	2.3249e-11	7.20718e-10	[5, 7]	Group45	22.093	19	[ABHD14B, ACSL3, AGR2, ANXA13, ARF6, ATP2B4, EGFR, EPB41L2, EZR, KIF5B, LGALS3, MAPK1, PLS1, RHOG, SORBS1, SQSTM1, STX3, STX4, VIL1]
GO:1905475	regulation of protein localization to membrane	GO_BiologicalProcess-EBI-UniProt-GOA_17.02.2020_00h00	2.76786e-09	5.17036e-06	2.3249e-11	7.20718e-10	[6]	Group45	13.8462	36	[ABHD14B, ACSL3, ACTB, AGR2, ANK3, ANXA13, APPL1, ARF6, ATP2B4, BSG, CALM2, CALM3, CDK5, CHORDC1, EGFR, EZR, KIF5B, LGALS3, MAPK1, MARCKSL1, MESD, MYO1C, NRBP1, PAK1, PICALM, PLS1, RHOG, SF1, SFN, SORBS1, SQSTM1, STOM, STX3, STX4, VIL1, YWHAG]
GO:1905477	positive regulation of protein localization to membrane	GO_BiologicalProcess-EBI-UniProt-GOA_17.02.2020_00h00	1.69076e-09	3.16511e-06	2.3249e-11	7.20718e-10	[5, 7]	Group45	16.9697	28	[ABHD14B, ACSL3, AGR2, ANK3, ANXA13, ARF6, ATP2B4, CDK5, CHORDC1, EGFR, EZR, KIF5B, LGALS3, MAPK1, MESD, MYO1C, PAK1, PLS1, RHOG, SF1, SFN, SORBS1, SQSTM1, STOM, STX3, STX4, VIL1, YWHAG]
GO:0033157	regulation of intracellular protein transport	GO_BiologicalProcess-EBI-UniProt-GOA_17.02.2020_00h00	7.42937e-06	0.0128082	2.3249e-11	7.20718e-10	[6, 7]	Group45	10.5431	33	[ABHD14B, AKAP8L, ANK3, BCAP31, CDK5, CHORDC1, HAX1, HSP90AB1, JUP, KIF5B, LMAN1, MAPK1, MAVS, MYO1C, NSUN2, NUCB1, NUP58, NUP62, PAK1, PDCD10, PRKAA1, PRKACA, PRKCA, PRKCD, PSEN1, RAN, RANGAP1, SAE1, SFN, STOM, TRIM28, UBAC2, VAC14]
GO:1903076	regulation of protein localization to plasma membrane	GO_BiologicalProcess-EBI-UniProt-GOA_17.02.2020_00h00	2.68674e-09	5.02151e-06	2.3249e-11	7.20718e-10	[7]	Group45	18.2482	25	[ABHD14B, ACSL3, ACTB, AGR2, ANXA13, APPL1, ARF6, ATP2B4, CALM2, CALM3, CDK5, EGFR, EZR, KIF5B, LGALS3, MAPK1, MARCKSL1, PICALM, PLS1, RHOG, SORBS1, SQSTM1, STX3, STX4, VIL1]
GO:1903078	positive regulation of protein localization to plasma membrane	GO_BiologicalProcess-EBI-UniProt-GOA_17.02.2020_00h00	1.22164e-08	2.26126e-05	2.3249e-11	7.20718e-10	[6, 8]	Group45	22.7848	18	[ABHD14B, ACSL3, AGR2, ANXA13, ARF6, ATP2B4, EGFR, EZR, KIF5B, LGALS3, MAPK1, PLS1, RHOG, SORBS1, SQSTM1, STX3, STX4, VIL1]
GO:0006403	RNA localization	GO_BiologicalProcess-EBI-UniProt-GOA_17.02.2020_00h00	4.05546e-15	7.90003e-12	9.44335e-23	3.96621e-21	[3]	Group46	16.2338	50	[AGFG1, CCT2, CCT4, CETN2, CHTOP, DDX19A, DDX39B, EIF3A, EIF4A2, EIF4E, ETF1, EXOSC10, FBL, FLOT1, FMR1, G3BP2, HGS, HNRNPU, IGF2BP1, IGF2BP2, IGF2BP3, KHSRP, MMAB, MYO1C, NOP58, NPM1, NUP107, NUP155, NUP160, NUP50, NUP58, NUP62, NUP85, NUP88, NUP98, RAN, RBM39, RTRAF, SARNP, SFPQ, SRRM1, SRSF5, SYMPK, TCP1, THOC1, TOMM20, U2AF1, U2AF1L4, USO1, YBX1]
GO:0071166	ribonucleoprotein complex localization	GO_BiologicalProcess-EBI-UniProt-GOA_17.02.2020_00h00	6.61086e-10	1.2435e-06	9.44335e-23	3.96621e-21	[3]	Group46	17.1598	29	[AGFG1, CHTOP, DDX19A, DDX39B, EIF3A, EIF4A2, EIF4E, HGS, NPM1, NUP107, NUP155, NUP160, NUP50, NUP58, NUP62, NUP85, NUP88, NUP98, PRPF31, RAN, RBM39, SARNP, SRRM1, SRSF5, SYMPK, THOC1, U2AF1, U2AF1L4, USO1]
GO:0044766	multi-organism transport	GO_BiologicalProcess-EBI-UniProt-GOA_17.02.2020_00h00	1.44037e-05	0.0245151	9.44335e-23	3.96621e-21	[3, 4]	Group46	18.5714	13	[KPNB1, NUP107, NUP155, NUP160, NUP50, NUP58, NUP62, NUP85, NUP88, NUP98, RAN, TCP1, TSG101]
GO:0051236	establishment of RNA localization	GO_BiologicalProcess-EBI-UniProt-GOA_17.02.2020_00h00	6.79678e-13	1.3145e-09	9.44335e-23	3.96621e-21	[3, 4]	Group46	15.6584	44	[AGFG1, CETN2, CHTOP, DDX19A, DDX39B, EIF3A, EIF4A2, EIF4E, ETF1, FLOT1, FMR1, G3BP2, HGS, HNRNPU, IGF2BP1, IGF2BP2, IGF2BP3, KHSRP, MMAB, MYO1C, NPM1, NUP107, NUP155, NUP160, NUP50, NUP58, NUP62, NUP85, NUP88, NUP98, RAN, RBM39, RTRAF, SARNP, SFPQ, SRRM1, SRSF5, SYMPK, THOC1, TOMM20, U2AF1, U2AF1L4, USO1, YBX1]
GO:0031503	protein-containing complex localization	GO_BiologicalProcess-EBI-UniProt-GOA_17.02.2020_00h00	2.45225e-07	0.000443612	9.44335e-23	3.96621e-21	[4]	Group46	11.3703	39	[AGFG1, CHTOP, DDX19A, DDX39B, DNM2, EIF3A, EIF4A2, EIF4E, EZR, HGS, HNRNPU, KIF5B, MMAB, NPM1, NUP107, NUP155, NUP160, NUP50, NUP58, NUP62, NUP85, NUP88, NUP98, RAB8A, RAN, RBM39, SARNP, SFPQ, SNAPIN, SRRM1, SRSF5, STX3, SYMPK, THOC1, TNPO1, U2AF1, U2AF1L4, USO1, WASL]
GO:0051169	nuclear transport	GO_BiologicalProcess-EBI-UniProt-GOA_17.02.2020_00h00	1.357e-08	2.50909e-05	9.44335e-23	3.96621e-21	[4, 5]	Group46	11.898	42	[AGFG1, APPL1, APPL2, CDK5, CHORDC1, CHTOP, CTNND1, DDX19A, DDX39B, EIF3A, EIF4A2, EIF4E, HGS, HMGA1, IPO9, KPNB1, LMNA, NPM1, NUP107, NUP155, NUP160, NUP50, NUP58, NUP62, NUP85, NUP88, NUP98, PHB2, PRKAG1, RAN, RBM39, RPL17, SARNP, SRRM1, SRSF5, STMN1, SYMPK, THOC1, TNPO1, U2AF1, U2AF1L4, USO1]
GO:0015931	nucleobase-containing compound transport	GO_BiologicalProcess-EBI-UniProt-GOA_17.02.2020_00h00	5.71843e-12	1.09794e-08	9.44335e-23	3.96621e-21	[5]	Group46	14.0719	47	[AGFG1, CETN2, CHTOP, DDX19A, DDX39B, EIF3A, EIF4A2, EIF4E, ETF1, FLOT1, FMR1, G3BP2, HGS, HNRNPU, IGF2BP1, IGF2BP2, IGF2BP3, KHSRP, MYO1C, NPM1, NUP107, NUP155, NUP160, NUP50, NUP58, NUP62, NUP85, NUP88, NUP98, RAN, RBM39, RTRAF, SARNP, SFPQ, SLC25A24, SLC25A4, SLC25A5, SLC25A6, SRRM1, SRSF5, SYMPK, THOC1, TOMM20, U2AF1, U2AF1L4, USO1, YBX1]
GO:0019058	viral life cycle	GO_BiologicalProcess-EBI-UniProt-GOA_17.02.2020_00h00	3.78386e-09	7.0569e-06	9.44335e-23	3.96621e-21	[5]	Group46	13.6882	36	[CAPG, CD55, CHMP1A, CHMP2A, CHMP4A, CHMP4B, CHMP5, CLDN1, CXADR, DEK, DHRS4, EGFR, F11R, HSP90AB1, ITGA2, ITGAV, KPNB1, NUP107, NUP155, NUP160, NUP50, NUP58, NUP62, NUP85, NUP88, NUP98, PC, PCBP1, PCBP2, PDCD6IP, PVR, RAB1B, RAN, SCARB2, SLC1A5, TSG101]
GO:0060968	regulation of gene silencing	GO_BiologicalProcess-EBI-UniProt-GOA_17.02.2020_00h00	5.66901e-06	0.0098244	9.44335e-23	3.96621e-21	[4, 6]	Group46	12.6984	24	[AGFG1, DDX5, EGFR, EIF4A2, EIF4E, FMR1, H1-10, H1-2, H1-3, H1-4, HMGA1, MAP2K2, NUP107, NUP155, NUP160, NUP50, NUP58, NUP62, NUP85, NUP88, NUP98, TCOF1, TRIM28, ZMPSTE24]
GO:0050658	RNA transport	GO_BiologicalProcess-EBI-UniProt-GOA_17.02.2020_00h00	1.30938e-12	2.52972e-09	9.44335e-23	3.96621e-21	[4, 5, 7]	Group46	15.6364	43	[AGFG1, CETN2, CHTOP, DDX19A, DDX39B, EIF3A, EIF4A2, EIF4E, ETF1, FLOT1, FMR1, G3BP2, HGS, HNRNPU, IGF2BP1, IGF2BP2, IGF2BP3, KHSRP, MYO1C, NPM1, NUP107, NUP155, NUP160, NUP50, NUP58, NUP62, NUP85, NUP88, NUP98, RAN, RBM39, RTRAF, SARNP, SFPQ, SRRM1, SRSF5, SYMPK, THOC1, TOMM20, U2AF1, U2AF1L4, USO1, YBX1]
GO:0006913	nucleocytoplasmic transport	GO_BiologicalProcess-EBI-UniProt-GOA_17.02.2020_00h00	2.90063e-08	5.34296e-05	9.44335e-23	3.96621e-21	[5, 6]	Group46	11.7479	41	[AGFG1, APPL1, APPL2, CDK5, CHORDC1, CHTOP, CTNND1, DDX19A, DDX39B, EIF3A, EIF4A2, EIF4E, HGS, IPO9, KPNB1, LMNA, NPM1, NUP107, NUP155, NUP160, NUP50, NUP58, NUP62, NUP85, NUP88, NUP98, PHB2, PRKAG1, RAN, RBM39, RPL17, SARNP, SRRM1, SRSF5, STMN1, SYMPK, THOC1, TNPO1, U2AF1, U2AF1L4, USO1]
GO:0075733	intracellular transport of virus	GO_BiologicalProcess-EBI-UniProt-GOA_17.02.2020_00h00	2.34665e-05	0.0394707	9.44335e-23	3.96621e-21	[5, 6]	Group46	19.0476	12	[KPNB1, NUP107, NUP155, NUP160, NUP50, NUP58, NUP62, NUP85, NUP88, NUP98, RAN, TSG101]
GO:1900034	regulation of cellular response to heat	GO_BiologicalProcess-EBI-UniProt-GOA_17.02.2020_00h00	5.81656e-09	1.0813e-05	9.44335e-23	3.96621e-21	[5, 6]	Group46	19.6429	22	[CALM1, CALM3, CAMK2B, CAMK2G, CHORDC1, DNAJB1, EIF4E, HSP90AA1, HSP90AB1, MAPK1, MAPK3, MMAB, NUP107, NUP155, NUP160, NUP50, NUP58, NUP62, NUP85, NUP88, NUP98, PAG1]
GO:0034504	protein localization to nucleus	GO_BiologicalProcess-EBI-UniProt-GOA_17.02.2020_00h00	8.81547e-06	0.0151362	9.44335e-23	3.96621e-21	[6]	Group46	11.8182	26	[AGFG1, APPL1, APPL2, CDK5, CTNND1, HNRNPU, IPO9, KPNB1, LMNA, NUP107, NUP155, NUP50, NUP62, NUP85, NUP88, NUP98, PHB2, RAN, RANGAP1, RPF2, RPL11, RPL17, SF1, SUN1, TNPO1, VAC14]
GO:0050657	nucleic acid transport	GO_BiologicalProcess-EBI-UniProt-GOA_17.02.2020_00h00	1.30938e-12	2.52972e-09	9.44335e-23	3.96621e-21	[6]	Group46	15.6364	43	[AGFG1, CETN2, CHTOP, DDX19A, DDX39B, EIF3A, EIF4A2, EIF4E, ETF1, FLOT1, FMR1, G3BP2, HGS, HNRNPU, IGF2BP1, IGF2BP2, IGF2BP3, KHSRP, MYO1C, NPM1, NUP107, NUP155, NUP160, NUP50, NUP58, NUP62, NUP85, NUP88, NUP98, RAN, RBM39, RTRAF, SARNP, SFPQ, SRRM1, SRSF5, SYMPK, THOC1, TOMM20, U2AF1, U2AF1L4, USO1, YBX1]
GO:0051028	mRNA transport	GO_BiologicalProcess-EBI-UniProt-GOA_17.02.2020_00h00	5.28323e-10	9.94832e-07	9.44335e-23	3.96621e-21	[5, 6, 8]	Group46	15.3153	34	[AGFG1, CETN2, CHTOP, DDX19A, DDX39B, EIF4A2, EIF4E, ETF1, FMR1, G3BP2, HGS, IGF2BP1, IGF2BP2, IGF2BP3, KHSRP, MYO1C, NUP107, NUP155, NUP160, NUP50, NUP58, NUP62, NUP85, NUP88, NUP98, RBM39, SARNP, SRRM1, SRSF5, SYMPK, THOC1, U2AF1, U2AF1L4, USO1]
GO:0051031	tRNA transport	GO_BiologicalProcess-EBI-UniProt-GOA_17.02.2020_00h00	6.98716e-07	0.00124861	9.44335e-23	3.96621e-21	[5, 6, 8]	Group46	26.087	12	[NUP107, NUP155, NUP160, NUP50, NUP58, NUP62, NUP85, NUP88, NUP98, RAN, TOMM20, YBX1]
GO:0006405	RNA export from nucleus	GO_BiologicalProcess-EBI-UniProt-GOA_17.02.2020_00h00	6.58518e-09	1.22353e-05	9.44335e-23	3.96621e-21	[5, 6, 7, 8]	Group46	16	28	[AGFG1, CHTOP, DDX19A, DDX39B, EIF3A, EIF4A2, EIF4E, HGS, NPM1, NUP107, NUP155, NUP160, NUP50, NUP58, NUP62, NUP85, NUP88, NUP98, RAN, RBM39, SARNP, SRRM1, SRSF5, SYMPK, THOC1, U2AF1, U2AF1L4, USO1]
GO:0017038	protein import	GO_BiologicalProcess-EBI-UniProt-GOA_17.02.2020_00h00	9.43569e-09	1.75032e-05	9.44335e-23	3.96621e-21	[5, 6, 7, 8]	Group46	15.3439	29	[AGFG1, APPL1, APPL2, CTNND1, GRPEL1, HSP90AA1, HSPD1, IPO9, KPNB1, LMNA, LONP1, NUP107, NUP155, NUP50, NUP62, NUP85, NUP88, NUP98, PEX14, PHB2, RAN, RPL17, SAMM50, TIMM44, TIMM50, TNPO1, TOMM20, TOMM22, TOMM40]
GO:0051168	nuclear export	GO_BiologicalProcess-EBI-UniProt-GOA_17.02.2020_00h00	5.40288e-08	9.89268e-05	9.44335e-23	3.96621e-21	[6, 7]	Group46	13.8889	30	[AGFG1, CHORDC1, CHTOP, CTNND1, DDX19A, DDX39B, EIF3A, EIF4A2, EIF4E, HGS, NPM1, NUP107, NUP155, NUP160, NUP50, NUP58, NUP62, NUP85, NUP88, NUP98, RAN, RBM39, SARNP, SRRM1, SRSF5, SYMPK, THOC1, U2AF1, U2AF1L4, USO1]
GO:0006611	protein export from nucleus	GO_BiologicalProcess-EBI-UniProt-GOA_17.02.2020_00h00	7.09751e-09	1.31801e-05	9.44335e-23	3.96621e-21	[5, 6, 7, 8, 9]	Group46	15.1515	30	[AGFG1, CHORDC1, CHTOP, CTNND1, DDX19A, DDX39B, EIF3A, EIF4A2, EIF4E, HGS, NPM1, NUP107, NUP155, NUP160, NUP50, NUP58, NUP62, NUP85, NUP88, NUP98, RAN, RBM39, SARNP, SRRM1, SRSF5, SYMPK, THOC1, U2AF1, U2AF1L4, USO1]
GO:0071426	ribonucleoprotein complex export from nucleus	GO_BiologicalProcess-EBI-UniProt-GOA_17.02.2020_00h00	2.57351e-09	4.81246e-06	9.44335e-23	3.96621e-21	[4, 5, 6, 7, 8, 9, 10]	Group46	16.6667	28	[AGFG1, CHTOP, DDX19A, DDX39B, EIF3A, EIF4A2, EIF4E, HGS, NPM1, NUP107, NUP155, NUP160, NUP50, NUP58, NUP62, NUP85, NUP88, NUP98, RAN, RBM39, SARNP, SRRM1, SRSF5, SYMPK, THOC1, U2AF1, U2AF1L4, USO1]
GO:0097064	ncRNA export from nucleus	GO_BiologicalProcess-EBI-UniProt-GOA_17.02.2020_00h00	9.92121e-06	0.0169851	9.44335e-23	3.96621e-21	[6, 7, 8, 9]	Group46	22.449	11	[NPM1, NUP107, NUP155, NUP160, NUP50, NUP58, NUP62, NUP85, NUP88, NUP98, RAN]
GO:0071427	mRNA-containing ribonucleoprotein complex export from nucleus	GO_BiologicalProcess-EBI-UniProt-GOA_17.02.2020_00h00	1.3817e-08	2.55338e-05	9.44335e-23	3.96621e-21	[5, 6, 7, 8, 9, 10, 11]	Group46	16.8919	25	[AGFG1, CHTOP, DDX19A, DDX39B, EIF4A2, EIF4E, HGS, NUP107, NUP155, NUP160, NUP50, NUP58, NUP62, NUP85, NUP88, NUP98, RBM39, SARNP, SRRM1, SRSF5, SYMPK, THOC1, U2AF1, U2AF1L4, USO1]
GO:0071431	tRNA-containing ribonucleoprotein complex export from nucleus	GO_BiologicalProcess-EBI-UniProt-GOA_17.02.2020_00h00	1.8038e-05	0.0305925	9.44335e-23	3.96621e-21	[5, 6, 7, 8, 9, 10, 11]	Group46	23.2558	10	[NUP107, NUP155, NUP160, NUP50, NUP58, NUP62, NUP85, NUP88, NUP98, RAN]
GO:0006406	mRNA export from nucleus	GO_BiologicalProcess-EBI-UniProt-GOA_17.02.2020_00h00	1.3817e-08	2.55338e-05	9.44335e-23	3.96621e-21	[5, 6, 7, 8, 9, 10, 11, 12]	Group46	16.8919	25	[AGFG1, CHTOP, DDX19A, DDX39B, EIF4A2, EIF4E, HGS, NUP107, NUP155, NUP160, NUP50, NUP58, NUP62, NUP85, NUP88, NUP98, RBM39, SARNP, SRRM1, SRSF5, SYMPK, THOC1, U2AF1, U2AF1L4, USO1]
GO:0006409	tRNA export from nucleus	GO_BiologicalProcess-EBI-UniProt-GOA_17.02.2020_00h00	1.8038e-05	0.0305925	9.44335e-23	3.96621e-21	[6, 7, 8, 9, 10, 11, 12]	Group46	23.2558	10	[NUP107, NUP155, NUP160, NUP50, NUP58, NUP62, NUP85, NUP88, NUP98, RAN]
GO:0006790	sulfur compound metabolic process	GO_BiologicalProcess-EBI-UniProt-GOA_17.02.2020_00h00	2.76905e-05	0.0462985	1.71807e-12	5.66964e-11	[3]	Group47	9.11111	41	[AASS, ABHD14B, ACAT1, ACSL3, ACSL5, ATP6V1H, BOLA2, BOLA2B, BPNT1, BSG, CNPY2, COASY, CPS1, DLAT, DPEP1, F11R, GCDH, GFER, GSTK1, GSTO1, HMGCS2, HSD17B12, HSD17B4, HSD17B8, MCCC2, MGST3, MTHFD1, NFS1, PAPSS2, PC, PDHX, PHGDH, PPP5C, SLC25A1, SLC25A10, SUCLG1, SULT1A3, SULT1A4, SULT2A1, TECR, TRIP10]
GO:0006793	phosphorus metabolic process	GO_BiologicalProcess-EBI-UniProt-GOA_17.02.2020_00h00	3.57961e-10	6.75114e-07	1.71807e-12	5.66964e-11	[3]	Group47	7.07728	185	[AASS, ABHD14B, ABI1, ACAT1, ACP6, ACSL3, ACSL5, AGFG1, AGPAT1, AK2, AK4, AKAP8L, ALDH18A1, ALDOC, ALPG, ALPP, APRT, ATP1A1, ATP5F1A, ATP5F1B, ATP5F1C, ATP5F1D, ATP5PB, ATP5PD, ATP5PO, BPNT1, CALM1, CALM2, CALM3, CAMK2B, CAMK2G, CCDC6, CCT2, CDK11A, CDK11B, CDK5, CKB, COASY, COPS8, COQ8A, COX5B, CPS1, CRYL1, CSNK1A1, DCTPP1, DLAT, DNPH1, DOLPP1, DPM1, DTYMK, EGFR, EIF2AK2, ENO1, ETF1, FDPS, FN3KR…
GO:0019637	organophosphate metabolic process	GO_BiologicalProcess-EBI-UniProt-GOA_17.02.2020_00h00	1.77077e-12	3.41582e-09	1.71807e-12	5.66964e-11	[3, 4]	Group47	9.43571	102	[AASS, ABHD14B, ACAT1, ACP6, ACSL3, ACSL5, AGPAT1, AK2, AK4, ALDOC, ALPP, APRT, ATP5F1A, ATP5F1B, ATP5F1C, ATP5F1D, ATP5PB, ATP5PD, ATP5PO, BPNT1, CALM1, CALM2, CALM3, CCT2, CKB, COASY, COX5B, CPS1, CRYL1, DCTPP1, DLAT, DNPH1, DOLPP1, DPM1, DTYMK, ENO1, FDPS, FOLR1, GALK1, GCDH, GFER, GFPT1, GK, GK3P, GMPS, GNPAT, HADHA, HADHB, HDHD5, HMGCS2, HPRT1, HSD17B12, HSD17B4, HSD17B8, IMPA1, INPPL1, ITPA…
GO:0006796	phosphate-containing compound metabolic process	GO_BiologicalProcess-EBI-UniProt-GOA_17.02.2020_00h00	9.94673e-11	1.88988e-07	1.71807e-12	5.66964e-11	[4]	Group47	7.18447	185	[AASS, ABHD14B, ABI1, ACAT1, ACP6, ACSL3, ACSL5, AGFG1, AGPAT1, AK2, AK4, AKAP8L, ALDH18A1, ALDOC, ALPG, ALPP, APRT, ATP1A1, ATP5F1A, ATP5F1B, ATP5F1C, ATP5F1D, ATP5PB, ATP5PD, ATP5PO, BPNT1, CALM1, CALM2, CALM3, CAMK2B, CAMK2G, CCDC6, CCT2, CDK11A, CDK11B, CDK5, CKB, COASY, COPS8, COQ8A, COX5B, CPS1, CRYL1, CSNK1A1, DCTPP1, DLAT, DNPH1, DOLPP1, DPM1, DTYMK, EGFR, EIF2AK2, ENO1, ETF1, FDPS, FN3KR…
GO:0055086	nucleobase-containing small molecule metabolic process	GO_BiologicalProcess-EBI-UniProt-GOA_17.02.2020_00h00	1.0294e-10	1.95484e-07	1.71807e-12	5.66964e-11	[3, 4, 5]	Group47	10.4863	69	[AASS, ABHD14B, ACAT1, ACSL3, ACSL5, AGPAT1, AK2, AK4, ALDH6A1, ALDOC, APRT, ATP5F1A, ATP5F1B, ATP5F1C, ATP5F1D, ATP5PB, ATP5PD, ATP5PO, BPNT1, CNPY2, COASY, COX5B, CPS1, DCTPP1, DLAT, DNPH1, DPM1, DTYMK, ENO1, GALK1, GCDH, GFPT1, GMPS, HMGCS2, HPRT1, HSD17B12, HSD17B4, HSD17B8, ITPA, KDM1A, LDHA, MAPK1, MCCC2, MTHFD1, NADK2, NAMPT, NDRG1, NT5E, NUDT4, OPA1, PAICS, PAPSS2, PDHX, PGM1, PKM, PNKP, …
GO:0072521	purine-containing compound metabolic process	GO_BiologicalProcess-EBI-UniProt-GOA_17.02.2020_00h00	3.77281e-12	7.25512e-09	1.71807e-12	5.66964e-11	[4]	Group47	12.5551	57	[AASS, ABHD14B, ACAT1, ACSL3, ACSL5, AK2, AK4, ALDOC, APRT, ATP5F1A, ATP5F1B, ATP5F1C, ATP5F1D, ATP5PB, ATP5PD, ATP5PO, BPNT1, CNPY2, COASY, COX5B, DLAT, DNPH1, ENO1, GALK1, GCDH, GMPS, HMGCS2, HPRT1, HSD17B12, HSD17B4, HSD17B8, ITPA, KDM1A, LDHA, MCCC2, MTHFD1, NDRG1, NT5E, NUDT4, OPA1, PAICS, PAPSS2, PDHX, PGM1, PKM, PPP5C, PRPSAP2, RAN, SLC25A1, SLC25A13, STOML2, SUCLG1, SULT1A3, SULT1A4, SULT…
GO:0019693	ribose phosphate metabolic process	GO_BiologicalProcess-EBI-UniProt-GOA_17.02.2020_00h00	1.61544e-11	3.09518e-08	1.71807e-12	5.66964e-11	[4, 5]	Group47	12.8079	52	[AASS, ABHD14B, ACAT1, ACSL3, ACSL5, AK2, AK4, ALDOC, APRT, ATP5F1A, ATP5F1B, ATP5F1C, ATP5F1D, ATP5PB, ATP5PD, ATP5PO, BPNT1, COASY, COX5B, DLAT, ENO1, GALK1, GCDH, GMPS, HMGCS2, HPRT1, HSD17B12, HSD17B4, HSD17B8, ITPA, LDHA, MCCC2, NT5E, NUDT4, OPA1, PAICS, PAPSS2, PDHX, PGM1, PKM, PPP5C, PRPSAP2, RAN, SLC25A1, SLC25A13, STOML2, SUCLG1, SULT1A3, SULT1A4, SULT2A1, TECR, TRIP10]
GO:0090407	organophosphate biosynthetic process	GO_BiologicalProcess-EBI-UniProt-GOA_17.02.2020_00h00	4.63315e-10	8.72886e-07	1.71807e-12	5.66964e-11	[4, 5]	Group47	10.241	68	[ACAT1, ACP6, ACSL3, ACSL5, AGPAT1, AK2, AK4, ALPP, APRT, ATP5F1A, ATP5F1B, ATP5F1C, ATP5F1D, ATP5PB, ATP5PD, ATP5PO, CCT2, CKB, COASY, COX5B, CPS1, CRYL1, DLAT, DOLPP1, DPM1, DTYMK, FDPS, GCDH, GFER, GK, GK3P, GMPS, GNPAT, HDHD5, HMGCS2, HPRT1, HSD17B12, HSD17B8, IMPA1, INPPL1, LPGAT1, MAPK1, MAVS, MTHFD1, NADK2, NAMPT, NFS1, PAICS, PAPSS2, PCYT2, PDHX, PHGDH, PKM, PLCB3, PLCD3, PNKP, PPP5C, PRK…
GO:0006753	nucleoside phosphate metabolic process	GO_BiologicalProcess-EBI-UniProt-GOA_17.02.2020_00h00	4.54747e-11	8.66748e-08	1.71807e-12	5.66964e-11	[4, 5, 6]	Group47	11.2933	62	[AASS, ABHD14B, ACAT1, ACSL3, ACSL5, AGPAT1, AK2, AK4, ALDOC, APRT, ATP5F1A, ATP5F1B, ATP5F1C, ATP5F1D, ATP5PB, ATP5PD, ATP5PO, BPNT1, COASY, COX5B, DCTPP1, DLAT, DNPH1, DTYMK, ENO1, GALK1, GCDH, GMPS, HMGCS2, HPRT1, HSD17B12, HSD17B4, HSD17B8, ITPA, LDHA, MAPK1, MCCC2, MTHFD1, NADK2, NAMPT, NT5E, NUDT4, OPA1, PAICS, PAPSS2, PDHX, PGM1, PKM, PNKP, PPP5C, PRPSAP2, RAN, SFN, SLC25A1, SLC25A13, STOM…
GO:0009108	coenzyme biosynthetic process	GO_BiologicalProcess-EBI-UniProt-GOA_17.02.2020_00h00	2.98106e-05	0.0497837	1.71807e-12	5.66964e-11	[5]	Group47	12.426	21	[ACAT1, ACSL3, ACSL5, COASY, COQ8A, DLAT, FDXR, GCDH, GFER, HSD17B12, HSD17B8, MTHFD1, NADK2, NAMPT, NDUFA9, NFS1, PDHX, PNKP, PPP5C, SLC25A1, TECR]
GO:0072522	purine-containing compound biosynthetic process	GO_BiologicalProcess-EBI-UniProt-GOA_17.02.2020_00h00	2.4997e-10	4.72692e-07	1.71807e-12	5.66964e-11	[5]	Group47	15.7407	34	[ACAT1, ACSL3, ACSL5, AK2, AK4, APRT, ATP5F1A, ATP5F1B, ATP5F1C, ATP5F1D, ATP5PB, ATP5PD, ATP5PO, CNPY2, COASY, COX5B, DLAT, GCDH, GMPS, HPRT1, HSD17B12, HSD17B8, MTHFD1, NT5E, PAICS, PAPSS2, PDHX, PKM, PPP5C, PRPSAP2, SLC25A1, SLC25A13, STOML2, TECR]
GO:1990542	mitochondrial transmembrane transport	GO_BiologicalProcess-EBI-UniProt-GOA_17.02.2020_00h00	5.41763e-11	1.03152e-07	1.71807e-12	5.66964e-11	[5]	Group47	21.7391	25	[AFG3L2, ATP5F1A, ATP5F1B, ATP5F1C, ATP5F1D, ATP5PB, ATP5PD, ATP5PO, COX5B, GRPEL1, HSPD1, LETM1, OPA1, PRKAA1, SFXN1, SFXN3, SLC25A1, SLC25A13, SLC25A15, SLC25A22, STOML2, TIMM44, TIMM50, TOMM20, TOMM40]
GO:0007007	inner mitochondrial membrane organization	GO_BiologicalProcess-EBI-UniProt-GOA_17.02.2020_00h00	3.51401e-10	6.63094e-07	1.71807e-12	5.66964e-11	[5, 6]	Group47	32	16	[AFG3L2, ATP5F1A, ATP5F1B, ATP5F1C, ATP5F1D, ATP5PB, ATP5PD, ATP5PO, CHCHD3, DNAJC11, IMMT, LETM1, MICOS13, OPA1, OXA1L, SAMM50]
GO:0046390	ribose phosphate biosynthetic process	GO_BiologicalProcess-EBI-UniProt-GOA_17.02.2020_00h00	4.71599e-09	8.78588e-06	1.71807e-12	5.66964e-11	[5, 6]	Group47	15.0485	31	[ACAT1, ACSL3, ACSL5, AK2, AK4, APRT, ATP5F1A, ATP5F1B, ATP5F1C, ATP5F1D, ATP5PB, ATP5PD, ATP5PO, COASY, COX5B, DLAT, GCDH, GMPS, HPRT1, HSD17B12, HSD17B8, PAICS, PAPSS2, PDHX, PKM, PPP5C, PRPSAP2, SLC25A1, SLC25A13, STOML2, TECR]
GO:0009117	nucleotide metabolic process	GO_BiologicalProcess-EBI-UniProt-GOA_17.02.2020_00h00	3.20852e-11	6.11865e-08	1.71807e-12	5.66964e-11	[5, 6, 7]	Group47	11.418	62	[AASS, ABHD14B, ACAT1, ACSL3, ACSL5, AGPAT1, AK2, AK4, ALDOC, APRT, ATP5F1A, ATP5F1B, ATP5F1C, ATP5F1D, ATP5PB, ATP5PD, ATP5PO, BPNT1, COASY, COX5B, DCTPP1, DLAT, DNPH1, DTYMK, ENO1, GALK1, GCDH, GMPS, HMGCS2, HPRT1, HSD17B12, HSD17B4, HSD17B8, ITPA, LDHA, MAPK1, MCCC2, MTHFD1, NADK2, NAMPT, NT5E, NUDT4, OPA1, PAICS, PAPSS2, PDHX, PGM1, PKM, PNKP, PPP5C, PRPSAP2, RAN, SFN, SLC25A1, SLC25A13, STOM…
GO:0009141	nucleoside triphosphate metabolic process	GO_BiologicalProcess-EBI-UniProt-GOA_17.02.2020_00h00	1.05002e-05	0.0179659	1.71807e-12	5.66964e-11	[5, 6, 7]	Group47	14.7541	18	[AK4, ATP5F1A, ATP5F1B, ATP5F1C, ATP5F1D, ATP5PB, ATP5PD, ATP5PO, COX5B, DCTPP1, DTYMK, ITPA, OPA1, PKM, RAN, SLC25A13, STOML2, SUCLG1]
GO:0033865	nucleoside bisphosphate metabolic process	GO_BiologicalProcess-EBI-UniProt-GOA_17.02.2020_00h00	6.09587e-07	0.0010936	1.71807e-12	5.66964e-11	[5, 6, 7]	Group47	14.3713	24	[AASS, ABHD14B, ACAT1, ACSL3, ACSL5, BPNT1, COASY, DLAT, GCDH, HMGCS2, HSD17B12, HSD17B4, HSD17B8, MCCC2, PAPSS2, PDHX, PPP5C, SLC25A1, SUCLG1, SULT1A3, SULT1A4, SULT2A1, TECR, TRIP10]
GO:1901293	nucleoside phosphate biosynthetic process	GO_BiologicalProcess-EBI-UniProt-GOA_17.02.2020_00h00	1.95136e-08	3.60416e-05	1.71807e-12	5.66964e-11	[5, 6, 7]	Group47	12.2642	39	[ACAT1, ACSL3, ACSL5, AGPAT1, AK2, AK4, APRT, ATP5F1A, ATP5F1B, ATP5F1C, ATP5F1D, ATP5PB, ATP5PD, ATP5PO, COASY, COX5B, DLAT, DTYMK, GCDH, GMPS, HPRT1, HSD17B12, HSD17B8, MAPK1, MTHFD1, NADK2, NAMPT, PAICS, PAPSS2, PDHX, PKM, PNKP, PPP5C, PRPSAP2, SLC25A1, SLC25A13, STOML2, SUCLG1, TECR]
GO:0006163	purine nucleotide metabolic process	GO_BiologicalProcess-EBI-UniProt-GOA_17.02.2020_00h00	1.94463e-12	3.74925e-09	1.71807e-12	5.66964e-11	[5, 6, 7, 8]	Group47	13.2029	54	[AASS, ABHD14B, ACAT1, ACSL3, ACSL5, AK2, AK4, ALDOC, APRT, ATP5F1A, ATP5F1B, ATP5F1C, ATP5F1D, ATP5PB, ATP5PD, ATP5PO, BPNT1, COASY, COX5B, DLAT, DNPH1, ENO1, GALK1, GCDH, GMPS, HMGCS2, HPRT1, HSD17B12, HSD17B4, HSD17B8, ITPA, LDHA, MCCC2, MTHFD1, NT5E, NUDT4, OPA1, PAICS, PAPSS2, PDHX, PGM1, PKM, PPP5C, PRPSAP2, RAN, SLC25A1, SLC25A13, STOML2, SUCLG1, SULT1A3, SULT1A4, SULT2A1, TECR, TRIP10]
GO:0009259	ribonucleotide metabolic process	GO_BiologicalProcess-EBI-UniProt-GOA_17.02.2020_00h00	1.88558e-11	3.61089e-08	1.71807e-12	5.66964e-11	[5, 6, 7, 8]	Group47	12.9114	51	[AASS, ABHD14B, ACAT1, ACSL3, ACSL5, AK2, AK4, ALDOC, APRT, ATP5F1A, ATP5F1B, ATP5F1C, ATP5F1D, ATP5PB, ATP5PD, ATP5PO, BPNT1, COASY, COX5B, DLAT, ENO1, GALK1, GCDH, GMPS, HMGCS2, HPRT1, HSD17B12, HSD17B4, HSD17B8, ITPA, LDHA, MCCC2, NT5E, NUDT4, OPA1, PAICS, PAPSS2, PDHX, PGM1, PKM, PPP5C, RAN, SLC25A1, SLC25A13, STOML2, SUCLG1, SULT1A3, SULT1A4, SULT2A1, TECR, TRIP10]
GO:0034032	purine nucleoside bisphosphate metabolic process	GO_BiologicalProcess-EBI-UniProt-GOA_17.02.2020_00h00	6.09587e-07	0.0010936	1.71807e-12	5.66964e-11	[5, 6, 7, 8]	Group47	14.3713	24	[AASS, ABHD14B, ACAT1, ACSL3, ACSL5, BPNT1, COASY, DLAT, GCDH, HMGCS2, HSD17B12, HSD17B4, HSD17B8, MCCC2, PAPSS2, PDHX, PPP5C, SLC25A1, SUCLG1, SULT1A3, SULT1A4, SULT2A1, TECR, TRIP10]
GO:0042407	cristae formation	GO_BiologicalProcess-EBI-UniProt-GOA_17.02.2020_00h00	9.05184e-11	1.72075e-07	1.71807e-12	5.66964e-11	[6, 7]	Group47	41.1765	14	[AFG3L2, ATP5F1A, ATP5F1B, ATP5F1C, ATP5F1D, ATP5PB, ATP5PD, ATP5PO, CHCHD3, DNAJC11, IMMT, LETM1, MICOS13, SAMM50]
GO:0009142	nucleoside triphosphate biosynthetic process	GO_BiologicalProcess-EBI-UniProt-GOA_17.02.2020_00h00	2.14511e-05	0.0362095	1.71807e-12	5.66964e-11	[6, 7, 8]	Group47	16.8675	14	[AK4, ATP5F1A, ATP5F1B, ATP5F1C, ATP5F1D, ATP5PB, ATP5PD, ATP5PO, COX5B, DTYMK, PKM, SLC25A13, STOML2, SUCLG1]
GO:0009144	purine nucleoside triphosphate metabolic process	GO_BiologicalProcess-EBI-UniProt-GOA_17.02.2020_00h00	8.33241e-06	0.0143317	1.71807e-12	5.66964e-11	[6, 7, 8]	Group47	17.2414	15	[AK4, ATP5F1A, ATP5F1B, ATP5F1C, ATP5F1D, ATP5PB, ATP5PD, ATP5PO, COX5B, ITPA, OPA1, PKM, RAN, SLC25A13, STOML2]
GO:0009165	nucleotide biosynthetic process	GO_BiologicalProcess-EBI-UniProt-GOA_17.02.2020_00h00	4.61859e-08	8.47512e-05	1.71807e-12	5.66964e-11	[6, 7, 8]	Group47	12.0635	38	[ACAT1, ACSL3, ACSL5, AGPAT1, AK2, AK4, APRT, ATP5F1A, ATP5F1B, ATP5F1C, ATP5F1D, ATP5PB, ATP5PD, ATP5PO, COASY, COX5B, DLAT, DTYMK, GCDH, GMPS, HPRT1, HSD17B12, HSD17B8, MAPK1, MTHFD1, NADK2, NAMPT, PAICS, PAPSS2, PDHX, PKM, PNKP, PPP5C, PRPSAP2, SLC25A1, SLC25A13, STOML2, TECR]
GO:0009199	ribonucleoside triphosphate metabolic process	GO_BiologicalProcess-EBI-UniProt-GOA_17.02.2020_00h00	5.32564e-06	0.00923466	1.71807e-12	5.66964e-11	[6, 7, 8]	Group47	17.8571	15	[AK4, ATP5F1A, ATP5F1B, ATP5F1C, ATP5F1D, ATP5PB, ATP5PD, ATP5PO, COX5B, ITPA, OPA1, PKM, RAN, SLC25A13, STOML2]
GO:0033875	ribonucleoside bisphosphate metabolic process	GO_BiologicalProcess-EBI-UniProt-GOA_17.02.2020_00h00	6.09587e-07	0.0010936	1.71807e-12	5.66964e-11	[6, 7, 8]	Group47	14.3713	24	[AASS, ABHD14B, ACAT1, ACSL3, ACSL5, BPNT1, COASY, DLAT, GCDH, HMGCS2, HSD17B12, HSD17B4, HSD17B8, MCCC2, PAPSS2, PDHX, PPP5C, SLC25A1, SUCLG1, SULT1A3, SULT1A4, SULT2A1, TECR, TRIP10]
GO:0006164	purine nucleotide biosynthetic process	GO_BiologicalProcess-EBI-UniProt-GOA_17.02.2020_00h00	2.16171e-10	4.09212e-07	1.71807e-12	5.66964e-11	[6, 7, 8, 9]	Group47	16.5803	32	[ACAT1, ACSL3, ACSL5, AK2, AK4, APRT, ATP5F1A, ATP5F1B, ATP5F1C, ATP5F1D, ATP5PB, ATP5PD, ATP5PO, COASY, COX5B, DLAT, GCDH, GMPS, HPRT1, HSD17B12, HSD17B8, MTHFD1, PAICS, PAPSS2, PDHX, PKM, PPP5C, PRPSAP2, SLC25A1, SLC25A13, STOML2, TECR]
GO:0006754	ATP biosynthetic process	GO_BiologicalProcess-EBI-UniProt-GOA_17.02.2020_00h00	1.14654e-06	0.0020351	1.71807e-12	5.66964e-11	[3, 4, 8, 9, 10, 11]	Group47	27.5	11	[ATP5F1A, ATP5F1B, ATP5F1C, ATP5F1D, ATP5PB, ATP5PD, ATP5PO, COX5B, PKM, SLC25A13, STOML2]
GO:0009150	purine ribonucleotide metabolic process	GO_BiologicalProcess-EBI-UniProt-GOA_17.02.2020_00h00	3.22897e-12	6.21577e-09	1.71807e-12	5.66964e-11	[6, 7, 8, 9]	Group47	13.5279	51	[AASS, ABHD14B, ACAT1, ACSL3, ACSL5, AK2, AK4, ALDOC, APRT, ATP5F1A, ATP5F1B, ATP5F1C, ATP5F1D, ATP5PB, ATP5PD, ATP5PO, BPNT1, COASY, COX5B, DLAT, ENO1, GALK1, GCDH, GMPS, HMGCS2, HPRT1, HSD17B12, HSD17B4, HSD17B8, ITPA, LDHA, MCCC2, NT5E, NUDT4, OPA1, PAICS, PAPSS2, PDHX, PGM1, PKM, PPP5C, RAN, SLC25A1, SLC25A13, STOML2, SUCLG1, SULT1A3, SULT1A4, SULT2A1, TECR, TRIP10]
GO:0009260	ribonucleotide biosynthetic process	GO_BiologicalProcess-EBI-UniProt-GOA_17.02.2020_00h00	7.09751e-09	1.31801e-05	1.71807e-12	5.66964e-11	[6, 7, 8, 9]	Group47	15.1515	30	[ACAT1, ACSL3, ACSL5, AK2, AK4, APRT, ATP5F1A, ATP5F1B, ATP5F1C, ATP5F1D, ATP5PB, ATP5PD, ATP5PO, COASY, COX5B, DLAT, GCDH, GMPS, HPRT1, HSD17B12, HSD17B8, PAICS, PAPSS2, PDHX, PKM, PPP5C, SLC25A1, SLC25A13, STOML2, TECR]
GO:0009205	purine ribonucleoside triphosphate metabolic process	GO_BiologicalProcess-EBI-UniProt-GOA_17.02.2020_00h00	1.20219e-06	0.00213268	1.71807e-12	5.66964e-11	[7, 8, 9]	Group47	20	15	[AK4, ATP5F1A, ATP5F1B, ATP5F1C, ATP5F1D, ATP5PB, ATP5PD, ATP5PO, COX5B, ITPA, OPA1, PKM, RAN, SLC25A13, STOML2]
GO:0009152	purine ribonucleotide biosynthetic process	GO_BiologicalProcess-EBI-UniProt-GOA_17.02.2020_00h00	9.16272e-10	1.71984e-06	1.71807e-12	5.66964e-11	[7, 8, 9, 10]	Group47	16.4835	30	[ACAT1, ACSL3, ACSL5, AK2, AK4, APRT, ATP5F1A, ATP5F1B, ATP5F1C, ATP5F1D, ATP5PB, ATP5PD, ATP5PO, COASY, COX5B, DLAT, GCDH, GMPS, HPRT1, HSD17B12, HSD17B8, PAICS, PAPSS2, PDHX, PKM, PPP5C, SLC25A1, SLC25A13, STOML2, TECR]
GO:0015985	energy coupled proton transport, down electrochemical gradient	GO_BiologicalProcess-EBI-UniProt-GOA_17.02.2020_00h00	1.27353e-06	0.00225797	1.71807e-12	5.66964e-11	[8, 9]	Group47	34.6154	9	[ATP5F1A, ATP5F1B, ATP5F1C, ATP5F1D, ATP5PB, ATP5PD, ATP5PO, COX5B, STOML2]
GO:0015986	ATP synthesis coupled proton transport	GO_BiologicalProcess-EBI-UniProt-GOA_17.02.2020_00h00	1.27353e-06	0.00225797	1.71807e-12	5.66964e-11	[4, 5, 9, 10, 11, 12]	Group47	34.6154	9	[ATP5F1A, ATP5F1B, ATP5F1C, ATP5F1D, ATP5PB, ATP5PD, ATP5PO, COX5B, STOML2]
GO:0042776	mitochondrial ATP synthesis coupled proton transport	GO_BiologicalProcess-EBI-UniProt-GOA_17.02.2020_00h00	3.76945e-07	0.000680385	1.71807e-12	5.66964e-11	[4, 5, 6, 7, 10, 11, 12, 13]	Group47	39.1304	9	[ATP5F1A, ATP5F1B, ATP5F1C, ATP5F1D, ATP5PB, ATP5PD, ATP5PO, COX5B, STOML2]
GO:0009206	purine ribonucleoside triphosphate biosynthetic process	GO_BiologicalProcess-EBI-UniProt-GOA_17.02.2020_00h00	2.6463e-05	0.0443255	1.71807e-12	5.66964e-11	[8, 9, 10]	Group47	20.3704	11	[ATP5F1A, ATP5F1B, ATP5F1C, ATP5F1D, ATP5PB, ATP5PD, ATP5PO, COX5B, PKM, SLC25A13, STOML2]
GO:0006725	cellular aromatic compound metabolic process	GO_BiologicalProcess-EBI-UniProt-GOA_17.02.2020_00h00	9.33171e-22	1.83648e-18	6.53005e-42	3.20003e-40	[3]	Group48	7.72827	281	[AASS, ABHD14B, ACAA1, ACAT1, ACIN1, ACSL3, ACSL5, ADRM1, AGFG1, AGPAT1, AIMP2, AIP, AK2, AK4, AKAP8L, ALDH6A1, ALDOC, ALPP, APRT, ARRB1, ATP5F1A, ATP5F1B, ATP5F1C, ATP5F1D, ATP5PB, ATP5PD, ATP5PO, BAX, BCAS2, BPNT1, BRCC3, BTF3, CAST, CD2BP2, CEBPZ, CELF1, CETN2, CHTOP, CNPY2, COASY, COMT, COPS7A, COPS7B, COPS8, COX5B, CPS1, CSTF3, CUL4B, CXADR, DARS2, DCTPP1, DDX10, DDX18, DDX21, DDX23, DDX27, …
GO:0006810	transport	GO_BiologicalProcess-EBI-UniProt-GOA_17.02.2020_00h00	4.35049e-28	8.65747e-25	6.53005e-42	3.20003e-40	[3]	Group48	7.33788	387	[AAGAB, ABCB10, ABCB7, ABCC3, ABCF1, ABI1, ACAA1, ACAT1, ACAT2, ACSL3, ACTB, ACTG1, ACTL8, ACTN4, ADD1, AFG3L2, AGFG1, AGPS, AGR2, AIP, ALDOC, ANK3, AP3B1, AP3S1, APPL1, APPL2, APRT, ARF6, ARFGAP3, ARFIP1, ARFIP2, ARRB1, ASPH, ATP1A1, ATP1B1, ATP1B3, ATP2B4, ATP5F1A, ATP5F1B, ATP5F1C, ATP5F1D, ATP5PB, ATP5PD, ATP5PO, ATP6V1A, ATP6V1B2, ATP6V1D, ATP6V1E1, ATP6V1G1, ATP6V1H, BAIAP2, BAX, BCAP31, BI…
GO:0008104	protein localization	GO_BiologicalProcess-EBI-UniProt-GOA_17.02.2020_00h00	1.55267e-29	3.09913e-26	6.53005e-42	3.20003e-40	[3]	Group48	9.25714	243	[AAGAB, ACAA1, ACTB, ACTG1, ACTN4, AFDN, AGFG1, AGPS, AIP, ANK3, AP3B1, AP3S1, APPL1, APPL2, ARF6, ARFGAP3, ARFIP1, ARFIP2, ARMCX3, ARRB1, ATP1B1, ATP1B3, ATP6V1A, ATP6V1B2, ATP6V1D, ATP6V1E1, ATP6V1G1, ATP6V1H, BAIAP2, BAX, BCAP31, BSG, BTF3, CALM1, CALM2, CALM3, CAMK2G, CANX, CDC37, CDK5, CETN2, CHMP1A, CHMP2A, CHMP4A, CHMP4B, CHMP5, CHORDC1, CHTOP, COASY, COPB1, CORO7, CORO7-PAM16, CTNNA1, CTN…
GO:0022613	ribonucleoprotein complex biogenesis	GO_BiologicalProcess-EBI-UniProt-GOA_17.02.2020_00h00	5.93969e-14	1.15349e-10	6.53005e-42	3.20003e-40	[3]	Group48	12.5954	66	[ALPP, CD2BP2, CEBPZ, CELF1, CUL4B, DDX10, DDX18, DDX21, DDX23, DDX27, DDX39B, DDX47, EBNA1BP2, EIF2B1, EIF2S2, EIF3A, EIF3E, EIF3H, EIF3J, EIF3M, EIF5, EXOSC10, EXOSC6, FBL, HGS, HSP90AA1, HSP90AB1, IGF2BP3, MPHOSPH10, MPP6, MRPL11, MTREX, NOP56, NOP58, NPM1, NUP88, PCMT1, PES1, PRPF31, RAN, RPF2, RPL11, RPL12, RPL23A, RPL5, RPL6, RPS14, RPS2, RPS27, RPS27L, RPS4X, RPS5, RPS6, RPS7, RRP8, RUVBL1…
GO:0034641	cellular nitrogen compound metabolic process	GO_BiologicalProcess-EBI-UniProt-GOA_17.02.2020_00h00	1.00285e-28	1.99968e-25	6.53005e-42	3.20003e-40	[3]	Group48	7.94574	328	[AASS, ABCF1, ABHD14B, ACAT1, ACIN1, ACSL3, ACSL5, ADRM1, AGFG1, AGMAT, AGPAT1, AIMP2, AIP, AK2, AK4, AKAP8L, ALDH6A1, ALDOC, ALPP, APRT, ARRB1, ASS1, ATP5F1A, ATP5F1B, ATP5F1C, ATP5F1D, ATP5PB, ATP5PD, ATP5PO, BAX, BCAS2, BPNT1, BRCC3, BSG, BTF3, CAST, CD2BP2, CEBPZ, CELF1, CETN2, CHTOP, CNPY2, COASY, COPS7A, COPS7B, COPS8, COX5B, CPS1, CSTF3, CUL4B, CXADR, DARS2, DCTPP1, DDX10, DDX18, DDX21, DD…
GO:0043170	macromolecule metabolic process	GO_BiologicalProcess-EBI-UniProt-GOA_17.02.2020_00h00	7.32832e-11	1.39458e-07	6.53005e-42	3.20003e-40	[3]	Group48	5.84646	412	[ABCF1, ABHD14B, ABI1, ABRAXAS2, ACIN1, ACTB, ADD1, ADRM1, AFG3L2, AGFG1, AIMP2, AIP, AKAP8L, ALPP, APPL2, ARRB1, ASPH, BAX, BCAS2, BOLA2, BOLA2B, BPNT1, BRCC3, BTF3, CACYBP, CALM1, CALM2, CALM3, CAMK2B, CAMK2G, CAND1, CAPN5, CASP6, CAST, CCDC115, CCDC6, CCS, CD2AP, CD2BP2, CD9, CDK11A, CDK11B, CDK5, CDK5RAP3, CEACAM1, CEBPZ, CELF1, CETN2, CHMP1A, CHMP4A, CHMP4B, CHORDC1, CHTOP, CKAP4, CLPP, CLPX…
GO:0044248	cellular catabolic process	GO_BiologicalProcess-EBI-UniProt-GOA_17.02.2020_00h00	4.74505e-12	9.11525e-09	6.53005e-42	3.20003e-40	[3]	Group48	7.65399	169	[AASS, ACAA1, ACAD10, ACAT1, ACAT2, ACBD5, ADRM1, AGFG1, ALDH6A1, ALPP, ARFIP2, ARRB1, BCKDHA, BDH1, CACYBP, CALM1, CALM2, CALM3, CCDC115, CD2AP, CDK5, CHMP2A, CHMP4A, CHMP4B, CHORDC1, CLPP, CLPX, COASY, COMT, CPS1, CRYL1, CTNNB1, CUL4B, CYP2S1, DBT, DCTPP1, DDX27, DDX5, DNPH1, DPEP1, ECHDC1, ECI2, EDC4, EIF3E, EIF4A2, EIF4E, ERLIN1, ERLIN2, ETF1, ETFA, EXOSC10, EXOSC6, FAF2, FEN1, GCDH, GFER, GK…
GO:0044249	cellular biosynthetic process	GO_BiologicalProcess-EBI-UniProt-GOA_17.02.2020_00h00	7.93194e-18	1.55545e-14	6.53005e-42	3.20003e-40	[3]	Group48	7.54157	254	[AASS, ABCF1, ACAT1, ACP6, ACSL3, ACSL5, ADRM1, AGFG1, AGMAT, AGPAT1, AGPS, AIMP2, AIP, AK2, AK4, ALDH18A1, ALPP, APRT, ARRB1, ASS1, ATP5F1A, ATP5F1B, ATP5F1C, ATP5F1D, ATP5PB, ATP5PD, ATP5PO, ATP6V1H, BAX, BDH1, BOLA2, BOLA2B, BTF3, CAST, CCT2, CEBPZ, CNPY2, COASY, COQ8A, COX5B, CPS1, CSTF3, CXADR, DARS2, DCTPP1, DDX21, DDX5, DEGS1, DEK, DHRS7B, DLAT, DNAJA3, DNPH1, DOLPP1, DPEP1, DPM1, DTYMK, E…
GO:0044403	symbiotic process	GO_BiologicalProcess-EBI-UniProt-GOA_17.02.2020_00h00	9.85196e-25	1.94675e-21	6.53005e-42	3.20003e-40	[3]	Group48	11.7803	133	[ABI1, ACBD3, AGFG1, AKAP8L, ATP6V1H, BAX, BCAP31, BIN1, CALM1, CALM2, CALM3, CAPG, CD55, CDK5RAP3, CHMP1A, CHMP2A, CHMP4A, CHMP4B, CHMP5, CLDN1, COPB1, COPS7A, COPS7B, CSRP1, CTNNB1, CTNND1, CXADR, DDX39B, DEK, DHRS4, EGFR, EIF2AK2, EIF3A, EIF3M, EIF4A1, EIF4A2, EIF4E, F11R, FDPS, FKBP8, FMR1, FUS, G3BP2, HMGA1, HNRNPU, HSP90AA1, HSP90AB1, HSPD1, IK, ITGA2, ITGAV, KALRN, KPNB1, KRT18, MAPK1, MAP…
GO:0046483	heterocycle metabolic process	GO_BiologicalProcess-EBI-UniProt-GOA_17.02.2020_00h00	1.49909e-23	2.95321e-20	6.53005e-42	3.20003e-40	[3]	Group48	7.90206	284	[AASS, ABHD14B, ACAT1, ACIN1, ACSL3, ACSL5, ADRM1, AGFG1, AGPAT1, AIMP2, AIP, AK2, AK4, AKAP8L, ALDH18A1, ALDH6A1, ALDOC, ALPP, APRT, ARRB1, ATP5F1A, ATP5F1B, ATP5F1C, ATP5F1D, ATP5PB, ATP5PD, ATP5PO, BAX, BCAS2, BPNT1, BRCC3, BTF3, CAST, CD2BP2, CEBPZ, CELF1, CETN2, CHTOP, CNPY2, COASY, COPS7A, COPS7B, COPS8, COX5B, CPS1, CSTF3, CUL4B, CXADR, DARS2, DCTPP1, DDX10, DDX18, DDX21, DDX23, DDX27, DDX…
GO:0070727	cellular macromolecule localization	GO_BiologicalProcess-EBI-UniProt-GOA_17.02.2020_00h00	9.81243e-27	1.94875e-23	6.53005e-42	3.20003e-40	[3]	Group48	9.90854	195	[ACAA1, AFDN, AGFG1, AGPS, AIP, ANK3, AP3B1, AP3S1, APPL1, APPL2, ARF6, ARFGAP3, ARFIP1, ARFIP2, ARMCX3, ATP1B1, ATP1B3, ATP6V1D, ATP6V1H, BAX, BCAP31, BSG, CALM1, CALM2, CALM3, CDC37, CDK5, CHMP4A, CHMP4B, CHORDC1, CHTOP, COASY, COPB1, CTNNA1, CTNNB1, CTNND1, CTTN, DCTN2, DDX19A, DDX27, DDX39B, DHRS4, DNAJA3, DNM2, ECI2, EGFR, EHD1, EIF3A, EIF4A2, EIF4E, EXOSC10, EZR, F11R, FAF2, FCHO2, FLOT1, G…
GO:1901360	organic cyclic compound metabolic process	GO_BiologicalProcess-EBI-UniProt-GOA_17.02.2020_00h00	4.57342e-24	9.01878e-21	6.53005e-42	3.20003e-40	[3]	Group48	7.74144	303	[AASS, ABHD14B, ACAA1, ACAT1, ACAT2, ACBD3, ACIN1, ACSL3, ACSL5, ADRM1, AGFG1, AGPAT1, AIMP2, AIP, AK2, AK4, AKAP8L, ALDH18A1, ALDH6A1, ALDOC, ALPP, APRT, ARRB1, ATP5F1A, ATP5F1B, ATP5F1C, ATP5F1D, ATP5PB, ATP5PD, ATP5PO, BAX, BCAS2, BPNT1, BRCC3, BTF3, CAST, CD2BP2, CEBPZ, CELF1, CETN2, CHTOP, CNPY2, COASY, COMT, COPS7A, COPS7B, COPS8, COX5B, CPS1, CSTF3, CUL4B, CXADR, DARS2, DCTPP1, DDX10, DDX1…
GO:1901564	organonitrogen compound metabolic process	GO_BiologicalProcess-EBI-UniProt-GOA_17.02.2020_00h00	1.60315e-14	3.11653e-11	6.53005e-42	3.20003e-40	[3]	Group48	6.27355	383	[AASS, ABCF1, ABHD14B, ABI1, ABRAXAS2, ACAT1, ACSL3, ACSL5, ACTB, ADD1, ADRM1, AFG3L2, AGFG1, AGMAT, AGPAT1, AIMP2, AIP, AK2, AK4, ALDH18A1, ALDH6A1, ALDOC, ALPP, APPL2, APRT, ARRB1, ASPH, ASS1, ATP5F1A, ATP5F1B, ATP5F1C, ATP5F1D, ATP5PB, ATP5PD, ATP5PO, BAX, BCKDHA, BOLA2, BOLA2B, BPNT1, BRCC3, BSG, CACYBP, CALM1, CALM2, CALM3, CAMK2B, CAMK2G, CAND1, CAPN5, CASP6, CCDC115, CCDC6, CCS, CCT2, CD2A…
GO:1901575	organic substance catabolic process	GO_BiologicalProcess-EBI-UniProt-GOA_17.02.2020_00h00	8.51937e-10	1.59994e-06	6.53005e-42	3.20003e-40	[3]	Group48	7.33395	159	[AASS, ACAA1, ACAD10, ACAT1, ACAT2, ACBD5, ADRM1, AGFG1, ALDH6A1, ALDOC, ALPP, ARRB1, BCKDHA, BDH1, CALM1, CALM2, CALM3, CCDC115, CD2AP, CDK5, CEACAM1, CHMP4A, CHMP4B, CHORDC1, CLPP, CLPX, COASY, COMT, CPS1, CRYL1, CTNNB1, CUL4B, DBT, DCTPP1, DDX27, DDX5, DNPH1, ECHDC1, ECI2, EDC4, EIF3E, EIF4A2, EIF4E, ENO1, ERLIN1, ERLIN2, ETF1, ETFA, EXOSC10, EXOSC6, FAF2, FEN1, GALK1, GCDH, GFER, GK, GK3P, GL…
GO:1901576	organic substance biosynthetic process	GO_BiologicalProcess-EBI-UniProt-GOA_17.02.2020_00h00	6.94107e-20	1.36323e-16	6.53005e-42	3.20003e-40	[3]	Group48	7.65262	267	[AASS, ABCF1, ACAT1, ACAT2, ACBD3, ACP6, ACSL3, ACSL5, ADRM1, AGFG1, AGMAT, AGPAT1, AGPS, AIMP2, AIP, AK2, AK4, ALDH18A1, ALDOC, ALPP, APRT, ARRB1, ASS1, ATP5F1A, ATP5F1B, ATP5F1C, ATP5F1D, ATP5PB, ATP5PD, ATP5PO, BAX, BDH1, BTF3, CAST, CCT2, CEBPZ, CKB, CNPY2, COASY, COQ8A, COX5B, CPS1, CRYL1, CSTF3, CXADR, DARS2, DCTPP1, DDX21, DDX5, DEGS1, DEK, DHCR7, DHRS7B, DLAT, DNAJA3, DNPH1, DOLPP1, DPEP1…
GO:0006139	nucleobase-containing compound metabolic process	GO_BiologicalProcess-EBI-UniProt-GOA_17.02.2020_00h00	5.53082e-25	1.09344e-21	6.53005e-42	3.20003e-40	[3, 4]	Group48	8.17722	275	[AASS, ABHD14B, ACAT1, ACIN1, ACSL3, ACSL5, ADRM1, AGFG1, AGPAT1, AIMP2, AIP, AK2, AK4, AKAP8L, ALDH6A1, ALDOC, ALPP, APRT, ARRB1, ATP5F1A, ATP5F1B, ATP5F1C, ATP5F1D, ATP5PB, ATP5PD, ATP5PO, BAX, BCAS2, BPNT1, BRCC3, BTF3, CAST, CD2BP2, CEBPZ, CELF1, CETN2, CHTOP, CNPY2, COASY, COPS7A, COPS7B, COPS8, COX5B, CPS1, CSTF3, CUL4B, CXADR, DARS2, DCTPP1, DDX10, DDX18, DDX21, DDX23, DDX27, DDX39B, DDX42…
GO:0019538	protein metabolic process	GO_BiologicalProcess-EBI-UniProt-GOA_17.02.2020_00h00	6.2037e-07	0.00111232	6.53005e-42	3.20003e-40	[3, 4]	Group48	5.84947	293	[ABCF1, ABI1, ABRAXAS2, ACTB, ADD1, ADRM1, AFG3L2, AGFG1, AIMP2, AIP, ALPP, APPL2, ARRB1, ASPH, BOLA2, BOLA2B, BPNT1, BRCC3, CACYBP, CALM1, CALM2, CALM3, CAMK2B, CAMK2G, CAND1, CAPN5, CASP6, CCDC115, CCDC6, CCS, CD2AP, CDK11A, CDK11B, CDK5, CDK5RAP3, CEACAM1, CHMP1A, CHMP4A, CHMP4B, CKAP4, CLPP, CLPX, COPS7A, COPS7B, COPS8, COQ8A, CPS1, CSNK1A1, CTNNB1, CUL4B, CXADR, DARS2, DDRGK1, DOLPP1, DPEP1,…
GO:0044260	cellular macromolecule metabolic process	GO_BiologicalProcess-EBI-UniProt-GOA_17.02.2020_00h00	2.18859e-08	4.04013e-05	6.53005e-42	3.20003e-40	[3, 4]	Group48	5.83942	344	[ABCF1, ABHD14B, ABI1, ABRAXAS2, ACTB, ADD1, ADRM1, AFG3L2, AGFG1, AIMP2, AIP, ALPP, APPL2, ARRB1, ASPH, BAX, BRCC3, BTF3, CACYBP, CALM1, CALM2, CALM3, CAMK2B, CAMK2G, CAND1, CAST, CCDC115, CCDC6, CD2AP, CD9, CDK11A, CDK11B, CDK5, CDK5RAP3, CEACAM1, CEBPZ, CETN2, CHMP4A, CHMP4B, CKAP4, CLPP, CLPX, COPS7A, COPS7B, COPS8, COQ8A, CSNK1A1, CSTF3, CTNNB1, CUL4B, CXADR, DARS2, DCTPP1, DDRGK1, DDX21, DD…
GO:0045184	establishment of protein localization	GO_BiologicalProcess-EBI-UniProt-GOA_17.02.2020_00h00	1.11424e-27	2.21512e-24	6.53005e-42	3.20003e-40	[3, 4]	Group48	10.0671	195	[AAGAB, ACAA1, ACTN4, AFDN, AGFG1, AGPS, AIP, ANK3, AP3B1, AP3S1, APPL1, APPL2, ARF6, ARFGAP3, ARFIP1, ARFIP2, ARRB1, ATP1B1, ATP6V1A, ATP6V1B2, ATP6V1D, ATP6V1E1, ATP6V1G1, ATP6V1H, BAX, BCAP31, BTF3, CALM1, CALM2, CALM3, CAMK2G, CANX, CDC37, CDK5, CETN2, CHMP1A, CHMP2A, CHMP4A, CHMP4B, CHMP5, CHORDC1, CHTOP, COPB1, CORO7, CORO7-PAM16, CTNND1, CTTN, DDX19A, DDX27, DDX39B, DHRS4, DNM2, ECI2, EGFR…
GO:0046907	intracellular transport	GO_BiologicalProcess-EBI-UniProt-GOA_17.02.2020_00h00	2.60356e-32	5.19932e-29	6.53005e-42	3.20003e-40	[3, 4]	Group48	10.7742	199	[ACAA1, ACTN4, AGFG1, AGPS, AIP, ANK3, AP3B1, AP3S1, APPL1, APPL2, ARF6, ARFGAP3, ARFIP1, ARFIP2, ATP1B1, ATP5F1A, ATP5F1B, ATP5F1C, ATP5F1D, ATP5PB, ATP5PD, ATP5PO, BCAP31, BIN1, CALM2, CALM3, CAPZB, CD55, CDC37, CDK5, CHMP1A, CHMP2A, CHMP4A, CHMP4B, CHMP5, CHORDC1, CHTOP, COPB1, CORO7, CORO7-PAM16, COX5B, CTNND1, CTTN, CXADR, DCTN1, DCTN2, DDX19A, DDX27, DDX39B, DHRS4, DPY30, ECI2, EHD1, EHD4, …
GO:0009057	macromolecule catabolic process	GO_BiologicalProcess-EBI-UniProt-GOA_17.02.2020_00h00	1.79722e-07	0.000326017	6.53005e-42	3.20003e-40	[4]	Group48	7.7101	100	[ADRM1, AGFG1, ALPP, ARRB1, CALM1, CALM2, CALM3, CCDC115, CD2AP, CDK5, CEACAM1, CHMP4A, CHMP4B, CHORDC1, CLPP, CLPX, CTNNB1, CUL4B, DDX5, EDC4, EIF3E, EIF4A2, EIF4E, ERLIN1, ERLIN2, ETF1, EXOSC10, EXOSC6, FAF2, FEN1, GFER, HSP90AA1, HSP90B1, IGF2BP1, KHSRP, KPNB1, LONP1, LYPLA2, MTREX, NHLRC3, NPLOC4, PCBP2, PDCD6IP, PGM1, PICALM, PPP2R1A, PPP5C, PRKRA, PSMC6, PSMD8, PSME1, PSMF1, PTPN23, PYM1, R…
GO:0009059	macromolecule biosynthetic process	GO_BiologicalProcess-EBI-UniProt-GOA_17.02.2020_00h00	3.04149e-08	5.59938e-05	6.53005e-42	3.20003e-40	[4]	Group48	7.01595	154	[ABCF1, ADRM1, AGFG1, AIMP2, AIP, ARRB1, BAX, BTF3, CAST, CEBPZ, CSTF3, CXADR, DARS2, DDX21, DDX5, DEK, DNAJA3, DOLPP1, DPEP1, DPM1, EEF1A1, EEF1A1P5, EEF1B2, EEF1D, EEF1E1, EEF2, EGFR, EIF2AK2, EIF2B1, EIF2S2, EIF3A, EIF3E, EIF3H, EIF3J, EIF3M, EIF4A1, EIF4A2, EIF4B, EIF4E, EIF4G2, EIF5, ETF1, FARSB, FEN1, FUBP3, GFM2, GFPT1, GPRC5A, GTF2F1, HGS, HMGA1, HSP90AA1, HSP90AB1, HSPD1, IARS2, IGF2BP3,…
GO:0010467	gene expression	GO_BiologicalProcess-EBI-UniProt-GOA_17.02.2020_00h00	2.22607e-28	4.43433e-25	6.53005e-42	3.20003e-40	[4]	Group48	9.30606	232	[ABCF1, ACIN1, ADRM1, AFG3L2, AGFG1, AIMP2, AIP, AKAP8L, ALPP, ARRB1, ASPH, BAX, BCAS2, BOLA2, BOLA2B, BTF3, CAST, CCS, CD2BP2, CEBPZ, CELF1, CHTOP, CSTF3, CXADR, DARS2, DDX10, DDX18, DDX19A, DDX21, DDX23, DDX27, DDX39B, DDX42, DDX47, DDX5, DEK, DPEP1, EBNA1BP2, EEF1A1, EEF1A1P5, EEF1B2, EEF1D, EEF1E1, EEF2, EGFR, EIF2AK2, EIF2B1, EIF2S2, EIF3A, EIF3E, EIF3H, EIF3J, EIF3M, EIF4A1, EIF4A2, EIF4B, …
GO:0016032	viral process	GO_BiologicalProcess-EBI-UniProt-GOA_17.02.2020_00h00	1.33353e-24	2.63372e-21	6.53005e-42	3.20003e-40	[4]	Group48	12.2651	124	[ABI1, ACBD3, AGFG1, AKAP8L, ATP6V1H, BAX, BCAP31, BIN1, CALM1, CALM2, CALM3, CAPG, CD55, CDK5RAP3, CHMP1A, CHMP2A, CHMP4A, CHMP4B, CHMP5, CLDN1, COPB1, COPS7A, COPS7B, CTNNB1, CXADR, DEK, DHRS4, EGFR, EIF2AK2, EIF3A, EIF3M, EIF4A1, EIF4A2, EIF4E, F11R, FDPS, FKBP8, FMR1, G3BP2, HMGA1, HNRNPU, HSP90AA1, HSP90AB1, HSPD1, IK, ITGA2, ITGAV, KALRN, KPNB1, KRT18, MAPK1, MAPK3, MAVS, NPM1, NUP107, NUP1…
GO:0016192	vesicle-mediated transport	GO_BiologicalProcess-EBI-UniProt-GOA_17.02.2020_00h00	2.22888e-10	4.21705e-07	6.53005e-42	3.20003e-40	[4]	Group48	7.2766	171	[ABI1, ACAA1, ACTB, ACTG1, ACTL8, ACTN4, ALDOC, ANK3, AP3B1, AP3S1, APPL2, APRT, ARF6, ARFGAP3, ARRB1, ATP6V1D, ATP6V1H, BAIAP2, BCAP31, BIN1, CALM1, CALM2, CALM3, CAND1, CANX, CAPZB, CCT2, CD55, CD9, CDK5, CEACAM1, CEACAM6, CHMP1A, CHMP2A, CHMP4A, CHMP4B, CHMP5, CHORDC1, CKAP4, COPB1, CORO7, CORO7-PAM16, CSRP1, CTNNB1, CTTN, CXADR, DCTN1, DCTN2, DEGS1, DHRS4, DNM2, DPY30, DPYSL2, EEF1A1, EEF2, E…
GO:0019439	aromatic compound catabolic process	GO_BiologicalProcess-EBI-UniProt-GOA_17.02.2020_00h00	9.79525e-08	0.000178665	6.53005e-42	3.20003e-40	[4]	Group48	9.76909	55	[ACAA1, ACAT1, ALPP, COMT, DCTPP1, DDX5, DNPH1, EDC4, EIF3E, EIF4A2, EIF4E, ETF1, EXOSC10, EXOSC6, FEN1, HPRT1, ITPA, KHSRP, KPNB1, MTREX, NT5E, NUDT4, PPP2R1A, PYM1, RPL11, RPL12, RPL13, RPL17, RPL17-C18orf32, RPL19, RPL21, RPL23A, RPL27A, RPL31, RPL5, RPL6, RPL8, RPL9, RPLP2, RPS14, RPS2, RPS20, RPS26, RPS27, RPS3, RPS3A, RPS4X, RPS5, RPS6, RPS7, SULT1A3, SULT1A4, SUPV3L1, THRAP3, ZCCHC8]
GO:0034613	cellular protein localization	GO_BiologicalProcess-EBI-UniProt-GOA_17.02.2020_00h00	1.48551e-26	2.94725e-23	6.53005e-42	3.20003e-40	[4]	Group48	9.90301	194	[ACAA1, AFDN, AGFG1, AGPS, AIP, ANK3, AP3B1, AP3S1, APPL1, APPL2, ARF6, ARFGAP3, ARFIP1, ARFIP2, ARMCX3, ATP1B1, ATP1B3, ATP6V1D, ATP6V1H, BAX, BCAP31, BSG, CALM1, CALM2, CALM3, CDC37, CDK5, CHMP4A, CHMP4B, CHORDC1, CHTOP, COASY, COPB1, CTNNA1, CTNNB1, CTNND1, CTTN, DCTN2, DDX19A, DDX27, DDX39B, DHRS4, DNAJA3, DNM2, ECI2, EGFR, EHD1, EIF3A, EIF4A2, EIF4E, EZR, F11R, FAF2, FCHO2, FLOT1, GET3, GNPA…
GO:0043603	cellular amide metabolic process	GO_BiologicalProcess-EBI-UniProt-GOA_17.02.2020_00h00	1.49816e-24	2.95736e-21	6.53005e-42	3.20003e-40	[4]	Group48	12.3123	123	[AASS, ABCF1, ACAT1, ACSL3, ACSL5, AIMP2, AIP, ALPP, ASS1, BSG, CPS1, DARS2, DEGS1, DLAT, DPEP1, EEF1A1, EEF1A1P5, EEF1B2, EEF1D, EEF1E1, EEF2, EGFR, EIF2AK2, EIF2B1, EIF2S2, EIF3A, EIF3E, EIF3H, EIF3J, EIF3M, EIF4A1, EIF4A2, EIF4B, EIF4E, EIF4G2, EIF5, ETF1, FARSB, FLOT1, FOLR1, GCDH, GFM2, GSTK1, HGS, HMGCS2, HSD17B12, HSD17B4, HSD17B8, HSPD1, IARS2, IGF2BP1, IGF2BP2, IGF2BP3, LARP1, MARS1, MCC…
GO:0044270	cellular nitrogen compound catabolic process	GO_BiologicalProcess-EBI-UniProt-GOA_17.02.2020_00h00	1.57123e-07	0.000285336	6.53005e-42	3.20003e-40	[4]	Group48	9.81481	53	[ACAT1, ALDH6A1, DCTPP1, DDX5, DNPH1, DPEP1, EDC4, EIF3E, EIF4A2, EIF4E, ETF1, EXOSC10, EXOSC6, FEN1, HPRT1, ITPA, KHSRP, KPNB1, MTREX, NT5E, NUDT4, PPP2R1A, PYM1, RPL11, RPL12, RPL13, RPL17, RPL17-C18orf32, RPL19, RPL21, RPL23A, RPL27A, RPL31, RPL5, RPL6, RPL8, RPL9, RPLP2, RPS14, RPS2, RPS20, RPS26, RPS27, RPS3, RPS3A, RPS4X, RPS5, RPS6, RPS7, SUPV3L1, THRAP3, VDAC2, ZCCHC8]
GO:0044271	cellular nitrogen compound biosynthetic process	GO_BiologicalProcess-EBI-UniProt-GOA_17.02.2020_00h00	2.88562e-19	5.66158e-16	6.53005e-42	3.20003e-40	[4]	Group48	8.82917	184	[ABCF1, ACAT1, ACSL3, ACSL5, ADRM1, AGMAT, AGPAT1, AIMP2, AIP, AK2, AK4, APRT, ARRB1, ASS1, ATP5F1A, ATP5F1B, ATP5F1C, ATP5F1D, ATP5PB, ATP5PD, ATP5PO, BAX, BTF3, CAST, CEBPZ, CNPY2, COASY, COX5B, CPS1, CSTF3, CXADR, DARS2, DCTPP1, DDX21, DDX5, DEGS1, DEK, DLAT, DNPH1, DPEP1, DTYMK, EEF1A1, EEF1A1P5, EEF1B2, EEF1D, EEF1E1, EEF2, EGFR, EIF2AK2, EIF2B1, EIF2S2, EIF3A, EIF3E, EIF3H, EIF3J, EIF3M, EI…
GO:0046700	heterocycle catabolic process	GO_BiologicalProcess-EBI-UniProt-GOA_17.02.2020_00h00	7.78464e-08	0.000142148	6.53005e-42	3.20003e-40	[4]	Group48	10.0186	54	[ACAT1, ALDH6A1, DCTPP1, DDX5, DNPH1, DPEP1, EDC4, EIF3E, EIF4A2, EIF4E, ETF1, EXOSC10, EXOSC6, FEN1, HPRT1, ITPA, KHSRP, KPNB1, MTREX, NT5E, NUDT4, PPP2R1A, PRODH, PYM1, RPL11, RPL12, RPL13, RPL17, RPL17-C18orf32, RPL19, RPL21, RPL23A, RPL27A, RPL31, RPL5, RPL6, RPL8, RPL9, RPLP2, RPS14, RPS2, RPS20, RPS26, RPS27, RPS3, RPS3A, RPS4X, RPS5, RPS6, RPS7, SPAG9, SUPV3L1, THRAP3, ZCCHC8]
GO:0071702	organic substance transport	GO_BiologicalProcess-EBI-UniProt-GOA_17.02.2020_00h00	1.662e-26	3.29409e-23	6.53005e-42	3.20003e-40	[4]	Group48	8.92388	238	[AAGAB, ABCB7, ABCC3, ACAA1, ACAT1, ACAT2, ACSL3, ACTN4, AGFG1, AGPS, AGR2, AIP, ANK3, AP3B1, AP3S1, APPL1, APPL2, ARF6, ARFGAP3, ARFIP1, ARFIP2, ARRB1, ATP1B1, ATP6V1A, ATP6V1B2, ATP6V1D, ATP6V1E1, ATP6V1G1, ATP6V1H, BCAP31, BSG, BTF3, CAMK2G, CANX, CDC37, CDH17, CDK5, CEACAM1, CETN2, CHMP1A, CHMP2A, CHMP4A, CHMP4B, CHMP5, CHORDC1, CHTOP, COPB1, CORO7, CORO7-PAM16, CTNND1, CTTN, DDX19A, DDX27, D…
GO:0071705	nitrogen compound transport	GO_BiologicalProcess-EBI-UniProt-GOA_17.02.2020_00h00	3.73047e-28	7.42736e-25	6.53005e-42	3.20003e-40	[4]	Group48	9.60602	217	[AAGAB, ABCB7, ACAA1, ACTN4, AGFG1, AGPS, AGR2, AIP, ANK3, AP3B1, AP3S1, APPL1, APPL2, ARF6, ARFGAP3, ARFIP1, ARFIP2, ARRB1, ATP1B1, ATP6V1A, ATP6V1B2, ATP6V1D, ATP6V1E1, ATP6V1G1, ATP6V1H, BCAP31, BSG, BTF3, CAMK2G, CANX, CDC37, CDH17, CDK5, CETN2, CHMP1A, CHMP2A, CHMP4A, CHMP4B, CHMP5, CHORDC1, CHTOP, COPB1, CORO7, CORO7-PAM16, CTNND1, CTTN, DDX19A, DDX27, DDX39B, DHRS4, DNM2, ECI2, EHD1, EIF3A…
GO:1901361	organic cyclic compound catabolic process	GO_BiologicalProcess-EBI-UniProt-GOA_17.02.2020_00h00	4.84242e-08	8.87616e-05	6.53005e-42	3.20003e-40	[4]	Group48	9.70395	59	[ACAA1, ACAT1, ALDH6A1, ALPP, COMT, DCTPP1, DDX5, DNPH1, EDC4, EIF3E, EIF4A2, EIF4E, ETF1, EXOSC10, EXOSC6, FEN1, HPRT1, ITPA, KHSRP, KPNB1, MTREX, NT5E, NUDT4, PPP2R1A, PRODH, PSMD8, PYM1, RPL11, RPL12, RPL13, RPL17, RPL17-C18orf32, RPL19, RPL21, RPL23A, RPL27A, RPL31, RPL5, RPL6, RPL8, RPL9, RPLP2, RPS14, RPS2, RPS20, RPS26, RPS27, RPS3, RPS3A, RPS4X, RPS5, RPS6, RPS7, SPAG9, SULT1A3, SULT1A4, …
GO:1901566	organonitrogen compound biosynthetic process	GO_BiologicalProcess-EBI-UniProt-GOA_17.02.2020_00h00	3.10145e-21	6.09745e-18	6.53005e-42	3.20003e-40	[4]	Group48	9.69267	164	[AASS, ABCF1, ACAT1, ACSL3, ACSL5, AGMAT, AGPAT1, AIMP2, AIP, AK2, AK4, ALDH18A1, APRT, ASS1, ATP5F1A, ATP5F1B, ATP5F1C, ATP5F1D, ATP5PB, ATP5PD, ATP5PO, CCT2, CKB, CNPY2, COASY, COX5B, CPS1, DARS2, DEGS1, DLAT, DOLPP1, DPM1, DTYMK, EEF1A1, EEF1A1P5, EEF1B2, EEF1D, EEF1E1, EEF2, EGFR, EIF2AK2, EIF2B1, EIF2S2, EIF3A, EIF3E, EIF3H, EIF3J, EIF3M, EIF4A1, EIF4A2, EIF4B, EIF4E, EIF4G2, EIF5, ETF1, FAR…
GO:0006518	peptide metabolic process	GO_BiologicalProcess-EBI-UniProt-GOA_17.02.2020_00h00	2.86554e-24	5.6537e-21	6.53005e-42	3.20003e-40	[4, 5]	Group48	14.4578	96	[ABCF1, AIMP2, AIP, BSG, DARS2, DPEP1, EEF1A1, EEF1A1P5, EEF1B2, EEF1D, EEF1E1, EEF2, EGFR, EIF2AK2, EIF2B1, EIF2S2, EIF3A, EIF3E, EIF3H, EIF3J, EIF3M, EIF4A1, EIF4A2, EIF4B, EIF4E, EIF4G2, EIF5, ETF1, FARSB, GFM2, GSTK1, HGS, HSPD1, IARS2, IGF2BP1, IGF2BP2, IGF2BP3, LARP1, MARS1, MRPL11, MRPL16, MRPL19, MRPL24, MRPL3, MRPL38, MRPL9, MRPS31, MRPS36, MTIF2, NARS1, NDRG1, NRBP1, OXA1L, PPA2, PSEN1,…
GO:0034645	cellular macromolecule biosynthetic process	GO_BiologicalProcess-EBI-UniProt-GOA_17.02.2020_00h00	5.19928e-09	9.67586e-06	6.53005e-42	3.20003e-40	[4, 5]	Group48	7.21988	154	[ABCF1, ADRM1, AGFG1, AIMP2, AIP, ARRB1, BAX, BTF3, CAST, CEBPZ, CSTF3, CXADR, DARS2, DDX21, DDX5, DEK, DNAJA3, DOLPP1, DPEP1, DPM1, EEF1A1, EEF1A1P5, EEF1B2, EEF1D, EEF1E1, EEF2, EGFR, EIF2AK2, EIF2B1, EIF2S2, EIF3A, EIF3E, EIF3H, EIF3J, EIF3M, EIF4A1, EIF4A2, EIF4B, EIF4E, EIF4G2, EIF5, ETF1, FARSB, FEN1, FUBP3, GFM2, GFPT1, GPRC5A, GTF2F1, HGS, HMGA1, HSP90AA1, HSP90AB1, HSPD1, IARS2, IGF2BP3,…
GO:0034655	nucleobase-containing compound catabolic process	GO_BiologicalProcess-EBI-UniProt-GOA_17.02.2020_00h00	2.77521e-08	5.11471e-05	6.53005e-42	3.20003e-40	[4, 5]	Group48	10.661	50	[ACAT1, DCTPP1, DDX5, DNPH1, EDC4, EIF3E, EIF4A2, EIF4E, ETF1, EXOSC10, EXOSC6, FEN1, HPRT1, ITPA, KHSRP, KPNB1, MTREX, NT5E, NUDT4, PPP2R1A, PYM1, RPL11, RPL12, RPL13, RPL17, RPL17-C18orf32, RPL19, RPL21, RPL23A, RPL27A, RPL31, RPL5, RPL6, RPL8, RPL9, RPLP2, RPS14, RPS2, RPS20, RPS26, RPS27, RPS3, RPS3A, RPS4X, RPS5, RPS6, RPS7, SUPV3L1, THRAP3, ZCCHC8]
GO:0044265	cellular macromolecule catabolic process	GO_BiologicalProcess-EBI-UniProt-GOA_17.02.2020_00h00	1.1022e-07	0.000200711	6.53005e-42	3.20003e-40	[4, 5]	Group48	8.06452	90	[ADRM1, AGFG1, ALPP, ARRB1, CCDC115, CD2AP, CHMP4A, CHMP4B, CLPP, CLPX, CTNNB1, CUL4B, DDX5, EDC4, EIF3E, EIF4A2, EIF4E, ERLIN1, ERLIN2, ETF1, EXOSC10, EXOSC6, FAF2, FEN1, GFER, HSP90B1, IGF2BP1, KHSRP, KPNB1, LONP1, MTREX, NHLRC3, NPLOC4, PCBP2, PDCD6IP, PPP2R1A, PPP5C, PRKRA, PSMC6, PSMD8, PSME1, PSMF1, PTPN23, PYM1, RPL11, RPL12, RPL13, RPL17, RPL17-C18orf32, RPL19, RPL21, RPL23A, RPL27A, RPL3…
GO:0044267	cellular protein metabolic process	GO_BiologicalProcess-EBI-UniProt-GOA_17.02.2020_00h00	3.11673e-09	5.81894e-06	6.53005e-42	3.20003e-40	[4, 5]	Group48	6.24714	273	[ABCF1, ABI1, ABRAXAS2, ACTB, ADRM1, AFG3L2, AGFG1, AIMP2, AIP, ALPP, APPL2, ARRB1, ASPH, BRCC3, CACYBP, CALM1, CALM2, CALM3, CAMK2B, CAMK2G, CAND1, CCDC115, CCDC6, CD2AP, CDK11A, CDK11B, CDK5, CDK5RAP3, CHMP4A, CHMP4B, CKAP4, CLPP, CLPX, COPS7A, COPS7B, COPS8, COQ8A, CSNK1A1, CTNNB1, CUL4B, DARS2, DDRGK1, DOLPP1, DPM1, DPY30, EEF1A1, EEF1A1P5, EEF1B2, EEF1D, EEF1E1, EEF2, EGFR, EIF2AK2, EIF2B1, …
GO:0090304	nucleic acid metabolic process	GO_BiologicalProcess-EBI-UniProt-GOA_17.02.2020_00h00	9.02828e-16	1.76413e-12	6.53005e-42	3.20003e-40	[4, 5]	Group48	7.70893	214	[ABHD14B, ACIN1, ADRM1, AGFG1, AIMP2, AIP, AKAP8L, ALPP, ARRB1, BAX, BCAS2, BRCC3, BTF3, CAST, CD2BP2, CEBPZ, CELF1, CETN2, CHTOP, COPS7A, COPS7B, COPS8, CSTF3, CUL4B, CXADR, DARS2, DCTPP1, DDX10, DDX18, DDX21, DDX23, DDX27, DDX39B, DDX42, DDX47, DDX5, DEK, DPEP1, EBNA1BP2, EDC4, EEF1E1, EFHD2, EIF3A, EIF3E, EIF4A2, EIF4E, ETF1, EXOSC10, EXOSC6, FAM98B, FARSB, FBL, FEN1, FMR1, FUBP3, FUS, GNAS, G…
GO:0019080	viral gene expression	GO_BiologicalProcess-EBI-UniProt-GOA_17.02.2020_00h00	2.98956e-16	5.85654e-13	6.53005e-42	3.20003e-40	[5]	Group48	22.093	38	[EIF3A, NUP107, NUP155, NUP160, NUP50, NUP58, NUP62, NUP85, NUP88, NUP98, PCBP2, RPL11, RPL12, RPL13, RPL17, RPL17-C18orf32, RPL19, RPL21, RPL23A, RPL27A, RPL31, RPL5, RPL6, RPL8, RPL9, RPLP2, RPS14, RPS2, RPS20, RPS26, RPS27, RPS3, RPS3A, RPS4X, RPS5, RPS6, RPS7, SLC16A1]
GO:0033365	protein localization to organelle	GO_BiologicalProcess-EBI-UniProt-GOA_17.02.2020_00h00	4.86652e-21	9.56271e-18	6.53005e-42	3.20003e-40	[5]	Group48	11.9227	111	[ACAA1, AGFG1, AGPS, AIP, AP3B1, APPL1, APPL2, ARF6, ATP6V1D, BAX, BCAP31, CALM1, CALM2, CALM3, CDK5, CHMP4A, CHMP4B, CTNND1, DCTN2, DDX27, DHRS4, DNM2, ECI2, EHD1, GET3, GNPAT, GRPEL1, GSTK1, HGS, HNRNPU, HSD17B4, HSP90AA1, HSPD1, IK, IPO9, KALRN, KPNB1, LEMD2, LMNA, LONP1, MAPRE1, MARCKSL1, MMAB, MSH2, MTCH2, NUP107, NUP155, NUP50, NUP62, NUP85, NUP88, NUP98, OXA1L, PACSIN2, PES1, PEX14, PHB2, …
GO:0042886	amide transport	GO_BiologicalProcess-EBI-UniProt-GOA_17.02.2020_00h00	2.19794e-26	4.35411e-23	6.53005e-42	3.20003e-40	[5]	Group48	9.94274	191	[AAGAB, ACAA1, ACTN4, AGFG1, AGPS, AIP, ANK3, AP3B1, AP3S1, APPL1, APPL2, ARF6, ARFGAP3, ARFIP1, ARFIP2, ARRB1, ATP1B1, ATP6V1A, ATP6V1B2, ATP6V1D, ATP6V1E1, ATP6V1G1, ATP6V1H, BCAP31, BSG, BTF3, CAMK2G, CANX, CDC37, CDH17, CDK5, CETN2, CHMP1A, CHMP2A, CHMP4A, CHMP4B, CHMP5, CHORDC1, CHTOP, COPB1, CORO7, CORO7-PAM16, CTNND1, CTTN, DDX19A, DDX27, DDX39B, DHRS4, DNM2, ECI2, EHD1, EIF3A, EIF4A2, EIF…
GO:0043604	amide biosynthetic process	GO_BiologicalProcess-EBI-UniProt-GOA_17.02.2020_00h00	1.24128e-28	2.47388e-25	6.53005e-42	3.20003e-40	[5]	Group48	15.6682	102	[ABCF1, ACAT1, ACSL3, ACSL5, AIMP2, AIP, ASS1, CPS1, DARS2, DEGS1, DLAT, EEF1A1, EEF1A1P5, EEF1B2, EEF1D, EEF1E1, EEF2, EGFR, EIF2AK2, EIF2B1, EIF2S2, EIF3A, EIF3E, EIF3H, EIF3J, EIF3M, EIF4A1, EIF4A2, EIF4B, EIF4E, EIF4G2, EIF5, ETF1, FARSB, GCDH, GFM2, HGS, HSD17B12, HSD17B8, HSPD1, IARS2, IGF2BP3, LARP1, MARS1, MRPL11, MRPL16, MRPL19, MRPL24, MRPL3, MRPL38, MRPL9, MRPS31, MRPS36, MTHFD1, MTIF2…
GO:0072594	establishment of protein localization to organelle	GO_BiologicalProcess-EBI-UniProt-GOA_17.02.2020_00h00	9.40012e-24	1.85276e-20	6.53005e-42	3.20003e-40	[4, 5, 6]	Group48	15.4399	86	[ACAA1, AGFG1, AGPS, AIP, AP3B1, APPL1, APPL2, BAX, CALM1, CALM2, CALM3, CHMP4A, CHMP4B, CTNND1, DDX27, DHRS4, DNM2, ECI2, GET3, GNPAT, GRPEL1, GSTK1, HGS, HSD17B4, HSP90AA1, HSPD1, IPO9, KALRN, KPNB1, LMNA, LONP1, MMAB, NUP107, NUP155, NUP50, NUP62, NUP85, NUP88, NUP98, OXA1L, PEX14, PHB2, RAB10, RAN, RPL11, RPL12, RPL13, RPL17, RPL17-C18orf32, RPL19, RPL21, RPL23A, RPL27A, RPL31, RPL5, RPL6, RP…
GO:0072657	protein localization to membrane	GO_BiologicalProcess-EBI-UniProt-GOA_17.02.2020_00h00	4.76704e-13	9.22898e-10	6.53005e-42	3.20003e-40	[5]	Group48	11.6473	70	[AFDN, ANK3, ATP1B1, ATP1B3, BAX, BSG, CALM1, CALM2, CALM3, CDK5, CHMP4A, CHMP4B, DNAJA3, EGFR, EZR, F11R, FCHO2, FLOT1, GET3, GORASP2, HGS, HSP90AA1, JUP, KALRN, KRT18, LIN7A, LIN7C, MYO1C, NUP155, OXA1L, PALM, PDCD6IP, PKP2, PKP3, RAB10, RAB8A, RPL11, RPL12, RPL13, RPL17, RPL17-C18orf32, RPL19, RPL21, RPL23A, RPL27A, RPL31, RPL5, RPL6, RPL8, RPL9, RPLP2, RPS14, RPS2, RPS20, RPS26, RPS27, RPS3, …
GO:0090150	establishment of protein localization to membrane	GO_BiologicalProcess-EBI-UniProt-GOA_17.02.2020_00h00	2.10313e-14	4.08638e-11	6.53005e-42	3.20003e-40	[4, 5, 6]	Group48	15.3614	51	[AFDN, ANK3, ATP1B1, BAX, CALM1, CALM2, CALM3, CHMP4A, CHMP4B, EGFR, GET3, GORASP2, HSP90AA1, KALRN, KRT18, MYO1C, OXA1L, RAB10, RAB8A, RPL11, RPL12, RPL13, RPL17, RPL17-C18orf32, RPL19, RPL21, RPL23A, RPL27A, RPL31, RPL5, RPL6, RPL8, RPL9, RPLP2, RPS14, RPS2, RPS20, RPS26, RPS27, RPS3, RPS3A, RPS4X, RPS5, RPS6, RPS7, SAMM50, SEC61A1, SRPRA, STX3, SUGT1, TOMM22]
GO:0015031	protein transport	GO_BiologicalProcess-EBI-UniProt-GOA_17.02.2020_00h00	8.29883e-26	1.64317e-22	6.53005e-42	3.20003e-40	[4, 5, 6, 7]	Group48	10.0382	184	[AAGAB, ACAA1, ACTN4, AGFG1, AGPS, AIP, ANK3, AP3B1, AP3S1, APPL1, APPL2, ARF6, ARFGAP3, ARFIP1, ARFIP2, ARRB1, ATP1B1, ATP6V1A, ATP6V1B2, ATP6V1D, ATP6V1E1, ATP6V1G1, ATP6V1H, BCAP31, BTF3, CAMK2G, CANX, CDC37, CDK5, CETN2, CHMP1A, CHMP2A, CHMP4A, CHMP4B, CHMP5, CHORDC1, CHTOP, COPB1, CORO7, CORO7-PAM16, CTNND1, CTTN, DDX19A, DDX27, DDX39B, DHRS4, DNM2, ECI2, EHD1, EIF3A, EIF4A2, EIF4E, FAF2, GE…
GO:0015833	peptide transport	GO_BiologicalProcess-EBI-UniProt-GOA_17.02.2020_00h00	1.44609e-26	2.8705e-23	6.53005e-42	3.20003e-40	[5, 6]	Group48	10.0696	188	[AAGAB, ACAA1, ACTN4, AGFG1, AGPS, AIP, ANK3, AP3B1, AP3S1, APPL1, APPL2, ARF6, ARFGAP3, ARFIP1, ARFIP2, ARRB1, ATP1B1, ATP6V1A, ATP6V1B2, ATP6V1D, ATP6V1E1, ATP6V1G1, ATP6V1H, BCAP31, BSG, BTF3, CAMK2G, CANX, CDC37, CDH17, CDK5, CETN2, CHMP1A, CHMP2A, CHMP4A, CHMP4B, CHMP5, CHORDC1, CHTOP, COPB1, CORO7, CORO7-PAM16, CTNND1, CTTN, DDX19A, DDX27, DDX39B, DHRS4, DNM2, ECI2, EHD1, EIF3A, EIF4A2, EIF…
GO:0016070	RNA metabolic process	GO_BiologicalProcess-EBI-UniProt-GOA_17.02.2020_00h00	7.36142e-16	1.43916e-12	6.53005e-42	3.20003e-40	[5, 6]	Group48	8.37367	173	[ACIN1, ADRM1, AIMP2, AIP, AKAP8L, ALPP, ARRB1, BAX, BCAS2, BTF3, CAST, CD2BP2, CEBPZ, CELF1, CHTOP, CSTF3, CXADR, DARS2, DDX10, DDX18, DDX21, DDX23, DDX27, DDX39B, DDX42, DDX47, DDX5, DEK, DPEP1, EBNA1BP2, EDC4, EEF1E1, EIF3A, EIF3E, EIF4A2, EIF4E, ETF1, EXOSC10, EXOSC6, FAM98B, FARSB, FBL, FEN1, FMR1, FUBP3, FUS, GPRC5A, GTF2F1, HGS, HNRNPM, HNRNPU, HSP90B1, IARS2, IGF2BP3, IK, KDM1A, KHDRBS1, …
GO:0019083	viral transcription	GO_BiologicalProcess-EBI-UniProt-GOA_17.02.2020_00h00	3.04732e-16	5.96665e-13	6.53005e-42	3.20003e-40	[5, 6]	Group48	23.9726	35	[NUP107, NUP155, NUP160, NUP50, NUP58, NUP62, NUP85, NUP88, NUP98, RPL11, RPL12, RPL13, RPL17, RPL17-C18orf32, RPL19, RPL21, RPL23A, RPL27A, RPL31, RPL5, RPL6, RPL8, RPL9, RPLP2, RPS14, RPS2, RPS20, RPS26, RPS27, RPS3, RPS3A, RPS4X, RPS5, RPS6, RPS7]
GO:0043043	peptide biosynthetic process	GO_BiologicalProcess-EBI-UniProt-GOA_17.02.2020_00h00	5.38343e-27	1.06969e-23	6.53005e-42	3.20003e-40	[5, 6]	Group48	17.3116	85	[ABCF1, AIMP2, AIP, DARS2, EEF1A1, EEF1A1P5, EEF1B2, EEF1D, EEF1E1, EEF2, EGFR, EIF2AK2, EIF2B1, EIF2S2, EIF3A, EIF3E, EIF3H, EIF3J, EIF3M, EIF4A1, EIF4A2, EIF4B, EIF4E, EIF4G2, EIF5, ETF1, FARSB, GFM2, HGS, HSPD1, IARS2, IGF2BP3, LARP1, MARS1, MRPL11, MRPL16, MRPL19, MRPL24, MRPL3, MRPL38, MRPL9, MRPS31, MRPS36, MTIF2, NARS1, NDRG1, OXA1L, PPA2, RARS1, RBM4, RPL11, RPL12, RPL13, RPL17, RPL17-C18…
GO:0006396	RNA processing	GO_BiologicalProcess-EBI-UniProt-GOA_17.02.2020_00h00	1.50726e-15	2.94217e-12	6.53005e-42	3.20003e-40	[5, 6, 7]	Group48	10.2467	108	[ACIN1, AIP, AKAP8L, ALPP, BCAS2, CD2BP2, CELF1, CHTOP, CSTF3, DDX10, DDX18, DDX21, DDX23, DDX27, DDX39B, DDX42, DDX47, DDX5, EBNA1BP2, EIF3A, ETF1, EXOSC10, EXOSC6, FAM98B, FBL, FMR1, FUS, GTF2F1, HGS, HNRNPM, HNRNPU, HSP90B1, IGF2BP3, IK, KDM1A, KHDRBS1, KHSRP, LGALS3, MARCKSL1, MBNL1, MPHOSPH10, MPP6, MTREX, NONO, NOP56, NOP58, NSUN2, PCBP1, PCBP2, PCMT1, PDAP1, PES1, PNN, PPP2R1A, PPP4R2, PRK…
GO:0006401	RNA catabolic process	GO_BiologicalProcess-EBI-UniProt-GOA_17.02.2020_00h00	2.61126e-10	4.93528e-07	6.53005e-42	3.20003e-40	[5, 6, 7]	Group48	13.5484	42	[DDX5, EDC4, EIF3E, EIF4A2, EIF4E, ETF1, EXOSC10, EXOSC6, FEN1, KHSRP, MTREX, PPP2R1A, PYM1, RPL11, RPL12, RPL13, RPL17, RPL17-C18orf32, RPL19, RPL21, RPL23A, RPL27A, RPL31, RPL5, RPL6, RPL8, RPL9, RPLP2, RPS14, RPS2, RPS20, RPS26, RPS27, RPS3, RPS3A, RPS4X, RPS5, RPS6, RPS7, SUPV3L1, THRAP3, ZCCHC8]
GO:0006412	translation	GO_BiologicalProcess-EBI-UniProt-GOA_17.02.2020_00h00	6.18663e-29	1.23423e-25	6.53005e-42	3.20003e-40	[5, 6, 7]	Group48	18.3983	85	[ABCF1, AIMP2, AIP, DARS2, EEF1A1, EEF1A1P5, EEF1B2, EEF1D, EEF1E1, EEF2, EGFR, EIF2AK2, EIF2B1, EIF2S2, EIF3A, EIF3E, EIF3H, EIF3J, EIF3M, EIF4A1, EIF4A2, EIF4B, EIF4E, EIF4G2, EIF5, ETF1, FARSB, GFM2, HGS, HSPD1, IARS2, IGF2BP3, LARP1, MARS1, MRPL11, MRPL16, MRPL19, MRPL24, MRPL3, MRPL38, MRPL9, MRPS31, MRPS36, MTIF2, NARS1, NDRG1, OXA1L, PPA2, RARS1, RBM4, RPL11, RPL12, RPL13, RPL17, RPL17-C18…
GO:0006413	translational initiation	GO_BiologicalProcess-EBI-UniProt-GOA_17.02.2020_00h00	8.51013e-20	1.67054e-16	6.53005e-42	3.20003e-40	[3, 6, 7, 8]	Group48	24.1573	43	[EIF2B1, EIF2S2, EIF3A, EIF3E, EIF3H, EIF3J, EIF3M, EIF4A1, EIF4A2, EIF4B, EIF4E, EIF4G2, EIF5, LARP1, MTIF2, RBM4, RPL11, RPL12, RPL13, RPL17, RPL17-C18orf32, RPL19, RPL21, RPL23A, RPL27A, RPL31, RPL5, RPL6, RPL8, RPL9, RPLP2, RPS14, RPS2, RPS20, RPS26, RPS27, RPS3, RPS3A, RPS4X, RPS5, RPS6, RPS7, SLC16A1]
GO:0006886	intracellular protein transport	GO_BiologicalProcess-EBI-UniProt-GOA_17.02.2020_00h00	4.69221e-25	9.2812e-22	6.53005e-42	3.20003e-40	[4, 5, 6, 7, 8]	Group48	11.5737	139	[ACAA1, AGFG1, AGPS, AIP, AP3B1, AP3S1, APPL1, APPL2, ARF6, ARFGAP3, ARFIP1, ARFIP2, ATP1B1, BCAP31, CDC37, CDK5, CHMP4A, CHMP4B, CHORDC1, CHTOP, COPB1, CTNND1, CTTN, DDX19A, DDX27, DDX39B, DHRS4, ECI2, EHD1, EIF3A, EIF4A2, EIF4E, FAF2, GET3, GNPAT, GRPEL1, GSTK1, HGS, HNRNPU, HSD17B4, HSP90AA1, HSP90B1, HSPD1, IGF2BP1, IPO9, KALRN, KIF5B, KPNB1, LMNA, LONP1, MYO1C, NAPG, NPLOC4, NPM1, NUP107, NU…
GO:0070972	protein localization to endoplasmic reticulum	GO_BiologicalProcess-EBI-UniProt-GOA_17.02.2020_00h00	2.24047e-15	4.37115e-12	6.53005e-42	3.20003e-40	[6]	Group48	21.3873	37	[BCAP31, CHMP4A, CHMP4B, GET3, KALRN, RAB10, RPL11, RPL12, RPL13, RPL17, RPL17-C18orf32, RPL19, RPL21, RPL23A, RPL27A, RPL31, RPL5, RPL6, RPL8, RPL9, RPLP2, RPS14, RPS2, RPS20, RPS26, RPS27, RPS3, RPS3A, RPS4X, RPS5, RPS6, RPS7, SEC61A1, SPCS2, SRPRA, SUGT1, UBAC2]
GO:0072599	establishment of protein localization to endoplasmic reticulum	GO_BiologicalProcess-EBI-UniProt-GOA_17.02.2020_00h00	3.82905e-16	7.49345e-13	6.53005e-42	3.20003e-40	[5, 6, 7]	Group48	23.8095	35	[CHMP4A, CHMP4B, GET3, KALRN, RAB10, RPL11, RPL12, RPL13, RPL17, RPL17-C18orf32, RPL19, RPL21, RPL23A, RPL27A, RPL31, RPL5, RPL6, RPL8, RPL9, RPLP2, RPS14, RPS2, RPS20, RPS26, RPS27, RPS3, RPS3A, RPS4X, RPS5, RPS6, RPS7, SEC61A1, SPCS2, SRPRA, SUGT1]
GO:0006417	regulation of translation	GO_BiologicalProcess-EBI-UniProt-GOA_17.02.2020_00h00	1.44502e-12	2.79033e-09	6.53005e-42	3.20003e-40	[6, 7]	Group48	12.2047	62	[ABCF1, ALPP, CELF1, DDX39B, EEF1A1, EEF1A1P5, EEF1B2, EEF1D, EEF2, EIF2AK2, EIF2B1, EIF2S2, EIF3A, EIF3E, EIF3H, EIF3J, EIF3M, EIF4A1, EIF4A2, EIF4B, EIF4E, EIF4G2, EIF5, ETF1, FMR1, FXR2, GFM2, IGF2BP1, IGF2BP2, IGF2BP3, ITGA2, KHDRBS1, KHSRP, LARP1, LARP4B, MAPK1, MAPK3, MATR3, MTIF2, NCL, NPM1, PKP3, PRKCSH, PYM1, RBM39, RBM4, RBM4B, RPL5, RPS14, RPS27L, RPS3, RPS4X, RPS6KA3, SARNP, SLC16A1, …
GO:0016071	mRNA metabolic process	GO_BiologicalProcess-EBI-UniProt-GOA_17.02.2020_00h00	1.72331e-21	3.38975e-18	6.53005e-42	3.20003e-40	[6, 7]	Group48	12.2867	108	[ACIN1, AIP, AKAP8L, BCAS2, CD2BP2, CELF1, CHTOP, CSTF3, DDX23, DDX39B, DDX42, DDX47, DDX5, EDC4, EIF3E, EIF4A2, EIF4E, ETF1, EXOSC10, EXOSC6, FMR1, FUS, GTF2F1, HGS, HNRNPM, HNRNPU, HSP90B1, IK, KDM1A, KHDRBS1, KHSRP, LGALS3, MARCKSL1, MBNL1, MTREX, NONO, NSUN2, PCBP1, PCBP2, PCBP3, PCMT1, PDAP1, PNN, PPP2R1A, PPP4R2, PRKACA, PRKCA, PRKRA, PRPF31, PRPF4, PSPC1, PUF60, PYM1, RBM39, RBM4, RBM4B, R…
GO:0017038	protein import	GO_BiologicalProcess-EBI-UniProt-GOA_17.02.2020_00h00	9.43569e-09	1.75032e-05	6.53005e-42	3.20003e-40	[5, 6, 7, 8]	Group48	15.3439	29	[AGFG1, APPL1, APPL2, CTNND1, GRPEL1, HSP90AA1, HSPD1, IPO9, KPNB1, LMNA, LONP1, NUP107, NUP155, NUP50, NUP62, NUP85, NUP88, NUP98, PEX14, PHB2, RAN, RPL17, SAMM50, TIMM44, TIMM50, TNPO1, TOMM20, TOMM22, TOMM40]
GO:0034660	ncRNA metabolic process	GO_BiologicalProcess-EBI-UniProt-GOA_17.02.2020_00h00	1.17429e-08	2.17479e-05	6.53005e-42	3.20003e-40	[6, 7]	Group48	10.3512	56	[AIMP2, ALPP, DARS2, DDX10, DDX18, DDX21, DDX27, DDX47, EBNA1BP2, EEF1E1, EIF3A, EXOSC10, EXOSC6, FAM98B, FARSB, FBL, HGS, IARS2, IGF2BP3, KHSRP, MARS1, MPHOSPH10, MPP6, MTREX, NARS1, NOP56, NOP58, NSUN2, PES1, PPA2, PRKRA, RAN, RARS1, RPF2, RPL11, RPL12, RPL5, RPS14, RPS2, RPS27, RPS4X, RPS6, RPS7, RRP8, RTRAF, SRSF5, THUMPD1, TP53RK, TRMT10C, TRMT11, TRMT61A, USP14, WARS2, WBP11, YARS2, ZCCHC8]
GO:0002181	cytoplasmic translation	GO_BiologicalProcess-EBI-UniProt-GOA_17.02.2020_00h00	5.62006e-13	1.08748e-09	6.53005e-42	3.20003e-40	[6, 7, 8]	Group48	25.2427	26	[EIF2B1, EIF2S2, EIF3A, EIF3E, EIF3H, EIF3J, EIF3M, EIF4A1, EIF4A2, EIF4E, EIF5, ETF1, HSPD1, NDRG1, RBM4, RPL11, RPL17, RPL17-C18orf32, RPL19, RPL31, RPL6, RPL8, RPL9, RPS26, SLC16A1, ZC3H15]
GO:0002183	cytoplasmic translational initiation	GO_BiologicalProcess-EBI-UniProt-GOA_17.02.2020_00h00	3.47423e-08	6.39259e-05	6.53005e-42	3.20003e-40	[4, 7, 8, 9]	Group48	30.2326	13	[EIF2B1, EIF2S2, EIF3A, EIF3E, EIF3H, EIF3J, EIF3M, EIF4A1, EIF4A2, EIF4E, EIF5, RBM4, SLC16A1]
GO:0006397	mRNA processing	GO_BiologicalProcess-EBI-UniProt-GOA_17.02.2020_00h00	1.99628e-12	3.84683e-09	6.53005e-42	3.20003e-40	[6, 7, 8]	Group48	11.4428	69	[ACIN1, AIP, AKAP8L, BCAS2, CD2BP2, CELF1, CHTOP, CSTF3, DDX23, DDX39B, DDX42, DDX47, DDX5, ETF1, FMR1, FUS, GTF2F1, HGS, HNRNPM, HNRNPU, HSP90B1, IK, KDM1A, KHDRBS1, KHSRP, LGALS3, MARCKSL1, MBNL1, MTREX, NONO, PCBP1, PCBP2, PCMT1, PDAP1, PNN, PPP4R2, PRKACA, PRKCA, PRKRA, PRPF31, PRPF4, PSPC1, PUF60, RBM39, RBM4, RBM4B, SARNP, SF1, SF3B2, SFPQ, SNRNP40, SNRNP70, SNRPC, SRM, SRRM1, SRRM2, SRSF10…
GO:0006402	mRNA catabolic process	GO_BiologicalProcess-EBI-UniProt-GOA_17.02.2020_00h00	1.90005e-10	3.6006e-07	6.53005e-42	3.20003e-40	[6, 7, 8]	Group48	14.3911	39	[DDX5, EDC4, EIF3E, EIF4A2, EIF4E, ETF1, EXOSC10, EXOSC6, KHSRP, PPP2R1A, PYM1, RPL11, RPL12, RPL13, RPL17, RPL17-C18orf32, RPL19, RPL21, RPL23A, RPL27A, RPL31, RPL5, RPL6, RPL8, RPL9, RPLP2, RPS14, RPS2, RPS20, RPS26, RPS27, RPS3, RPS3A, RPS4X, RPS5, RPS6, RPS7, SUPV3L1, THRAP3]
GO:0006605	protein targeting	GO_BiologicalProcess-EBI-UniProt-GOA_17.02.2020_00h00	3.23959e-17	6.34959e-14	6.53005e-42	3.20003e-40	[5, 6, 7, 8, 9]	Group48	14.8064	65	[ACAA1, AGPS, AIP, AP3B1, CDC37, CHMP4A, CHMP4B, DDX27, DHRS4, ECI2, GET3, GNPAT, GRPEL1, GSTK1, HGS, HSD17B4, HSP90AA1, HSPD1, KALRN, LONP1, MYO1C, OXA1L, PEX14, RPL11, RPL12, RPL13, RPL17, RPL17-C18orf32, RPL19, RPL21, RPL23A, RPL27A, RPL31, RPL5, RPL6, RPL8, RPL9, RPLP2, RPS14, RPS2, RPS20, RPS26, RPS27, RPS3, RPS3A, RPS4X, RPS5, RPS6, RPS7, SAMM50, SCARB2, SEC61A1, SLC25A6, SPCS2, SRPRA, SRSF…
GO:0008380	RNA splicing	GO_BiologicalProcess-EBI-UniProt-GOA_17.02.2020_00h00	6.41106e-15	1.24823e-11	6.53005e-42	3.20003e-40	[6, 7, 8]	Group48	13.3197	65	[ACIN1, AKAP8L, BCAS2, CD2BP2, CELF1, CSTF3, DDX23, DDX39B, DDX42, DDX47, DDX5, FAM98B, FMR1, FUS, GTF2F1, HGS, HNRNPM, HNRNPU, HSP90B1, IK, KDM1A, KHSRP, LGALS3, MARCKSL1, MBNL1, MPHOSPH10, MTREX, NONO, PCBP1, PCBP2, PCMT1, PDAP1, PNN, PPP2R1A, PPP4R2, PRPF31, PRPF4, PSPC1, PUF60, RBM39, RBM4, RBM4B, RTRAF, SARNP, SF1, SF3B2, SFPQ, SNRNP40, SNRNP70, SNRPC, SRRM1, SRRM2, SRSF10, SRSF5, STMN1, SYM…
GO:0006364	rRNA processing	GO_BiologicalProcess-EBI-UniProt-GOA_17.02.2020_00h00	5.18337e-07	0.000932488	6.53005e-42	3.20003e-40	[5, 7, 8, 9]	Group48	12.3016	31	[ALPP, DDX10, DDX18, DDX21, DDX27, DDX47, EBNA1BP2, EIF3A, EXOSC10, EXOSC6, FBL, IGF2BP3, MPHOSPH10, MPP6, MTREX, NOP56, NOP58, PES1, RPF2, RPL11, RPL12, RPL5, RPS14, RPS2, RPS27, RPS4X, RPS6, RPS7, RRP8, THUMPD1, WBP11]
GO:0006612	protein targeting to membrane	GO_BiologicalProcess-EBI-UniProt-GOA_17.02.2020_00h00	2.90432e-11	5.54435e-08	6.53005e-42	3.20003e-40	[5, 6, 7, 8, 9, 10]	Group48	17	34	[CHMP4A, CHMP4B, GET3, KALRN, MYO1C, RPL11, RPL12, RPL13, RPL17, RPL17-C18orf32, RPL19, RPL21, RPL23A, RPL27A, RPL31, RPL5, RPL6, RPL8, RPL9, RPLP2, RPS14, RPS2, RPS20, RPS26, RPS27, RPS3, RPS3A, RPS4X, RPS5, RPS6, RPS7, SEC61A1, SRPRA, SUGT1]
GO:0016072	rRNA metabolic process	GO_BiologicalProcess-EBI-UniProt-GOA_17.02.2020_00h00	1.5455e-06	0.0027309	6.53005e-42	3.20003e-40	[7, 8]	Group48	11.6981	31	[ALPP, DDX10, DDX18, DDX21, DDX27, DDX47, EBNA1BP2, EIF3A, EXOSC10, EXOSC6, FBL, IGF2BP3, MPHOSPH10, MPP6, MTREX, NOP56, NOP58, PES1, RPF2, RPL11, RPL12, RPL5, RPS14, RPS2, RPS27, RPS4X, RPS6, RPS7, RRP8, THUMPD1, WBP11]
GO:0045182	translation regulator activity	GO_BiologicalProcess-EBI-UniProt-GOA_17.02.2020_00h00	4.31838e-13	8.3647e-10	6.53005e-42	3.20003e-40	[7, 8]	Group48	19.1257	35	[ABCF1, CELF1, EEF1A1, EEF1A1P5, EEF1B2, EEF1D, EEF2, EIF2AK2, EIF2B1, EIF2S2, EIF3A, EIF3E, EIF3H, EIF3J, EIF3M, EIF4A1, EIF4A2, EIF4B, EIF4E, EIF4G2, EIF5, ETF1, FMR1, FXR2, GFM2, IGF2BP1, IGF2BP2, IGF2BP3, LARP1, MTIF2, RPS14, RPS27L, SLC16A1, TSFM, TUFM]
GO:0000375	RNA splicing, via transesterification reactions	GO_BiologicalProcess-EBI-UniProt-GOA_17.02.2020_00h00	1.89128e-11	3.6199e-08	6.53005e-42	3.20003e-40	[7, 8, 9]	Group48	13.2432	49	[BCAS2, CD2BP2, CELF1, CSTF3, DDX23, DDX39B, DDX42, DDX5, FUS, GTF2F1, HGS, HNRNPM, HNRNPU, HSP90B1, IK, KDM1A, KHSRP, MPHOSPH10, MTREX, NONO, PCBP1, PCBP2, PCMT1, PDAP1, PNN, PRPF31, PRPF4, PSPC1, PUF60, RBM4, RBM4B, SF1, SF3B2, SFPQ, SNRNP40, SNRNP70, SNRPC, SRRM1, SRRM2, SRSF10, SRSF5, STMN1, SYMPK, U2AF1, U2AF1L4, USP39, WBP11, YBX1, ZCCHC8]
GO:0000956	nuclear-transcribed mRNA catabolic process	GO_BiologicalProcess-EBI-UniProt-GOA_17.02.2020_00h00	1.96437e-10	3.72052e-07	6.53005e-42	3.20003e-40	[7, 8, 9]	Group48	14.9194	37	[DDX5, EDC4, EIF3E, EIF4A2, EIF4E, ETF1, EXOSC10, EXOSC6, PPP2R1A, PYM1, RPL11, RPL12, RPL13, RPL17, RPL17-C18orf32, RPL19, RPL21, RPL23A, RPL27A, RPL31, RPL5, RPL6, RPL8, RPL9, RPLP2, RPS14, RPS2, RPS20, RPS26, RPS27, RPS3, RPS3A, RPS4X, RPS5, RPS6, RPS7, THRAP3]
GO:0008135	translation factor activity, RNA binding	GO_BiologicalProcess-EBI-UniProt-GOA_17.02.2020_00h00	1.92793e-11	3.6862e-08	6.53005e-42	3.20003e-40	[6, 7, 8, 9, 10]	Group48	22.7273	25	[ABCF1, EEF1A1, EEF1A1P5, EEF1B2, EEF1D, EEF2, EIF2B1, EIF2S2, EIF3A, EIF3E, EIF3H, EIF3J, EIF3M, EIF4A1, EIF4A2, EIF4B, EIF4E, EIF4G2, EIF5, ETF1, GFM2, MTIF2, SLC16A1, TSFM, TUFM]
GO:0045047	protein targeting to ER	GO_BiologicalProcess-EBI-UniProt-GOA_17.02.2020_00h00	1.06166e-15	2.07342e-12	6.53005e-42	3.20003e-40	[6, 7, 8, 9, 10]	Group48	23.7762	34	[CHMP4A, CHMP4B, GET3, KALRN, RPL11, RPL12, RPL13, RPL17, RPL17-C18orf32, RPL19, RPL21, RPL23A, RPL27A, RPL31, RPL5, RPL6, RPL8, RPL9, RPLP2, RPS14, RPS2, RPS20, RPS26, RPS27, RPS3, RPS3A, RPS4X, RPS5, RPS6, RPS7, SEC61A1, SPCS2, SRPRA, SUGT1]
GO:0003743	translation initiation factor activity	GO_BiologicalProcess-EBI-UniProt-GOA_17.02.2020_00h00	1.07385e-07	0.000195655	6.53005e-42	3.20003e-40	[4, 7, 8, 9, 10, 11]	Group48	23.8095	15	[EIF2B1, EIF2S2, EIF3A, EIF3E, EIF3H, EIF3J, EIF3M, EIF4A1, EIF4A2, EIF4B, EIF4E, EIF4G2, EIF5, MTIF2, SLC16A1]
GO:0006613	cotranslational protein targeting to membrane	GO_BiologicalProcess-EBI-UniProt-GOA_17.02.2020_00h00	1.74384e-12	3.36561e-09	6.53005e-42	3.20003e-40	[6, 7, 8, 9, 10, 11]	Group48	22.4	28	[RPL11, RPL12, RPL13, RPL17, RPL17-C18orf32, RPL19, RPL21, RPL23A, RPL27A, RPL31, RPL5, RPL6, RPL8, RPL9, RPLP2, RPS14, RPS2, RPS20, RPS26, RPS27, RPS3, RPS3A, RPS4X, RPS5, RPS6, RPS7, SEC61A1, SRPRA]
GO:0090079	translation regulator activity, nucleic acid binding	GO_BiologicalProcess-EBI-UniProt-GOA_17.02.2020_00h00	3.1618e-11	6.03272e-08	6.53005e-42	3.20003e-40	[8, 9]	Group48	20	28	[ABCF1, CELF1, EEF1A1, EEF1A1P5, EEF1B2, EEF1D, EEF2, EIF2B1, EIF2S2, EIF3A, EIF3E, EIF3H, EIF3J, EIF3M, EIF4A1, EIF4A2, EIF4B, EIF4E, EIF4G2, EIF5, ETF1, GFM2, LARP1, MTIF2, RPS27L, SLC16A1, TSFM, TUFM]
GO:0000184	nuclear-transcribed mRNA catabolic process, nonsense-mediated decay	GO_BiologicalProcess-EBI-UniProt-GOA_17.02.2020_00h00	6.96238e-14	1.3507e-10	6.53005e-42	3.20003e-40	[8, 9, 10]	Group48	21.4286	33	[EIF3E, EIF4A2, EIF4E, ETF1, EXOSC10, PPP2R1A, PYM1, RPL11, RPL12, RPL13, RPL17, RPL17-C18orf32, RPL19, RPL21, RPL23A, RPL27A, RPL31, RPL5, RPL6, RPL8, RPL9, RPLP2, RPS14, RPS2, RPS20, RPS26, RPS27, RPS3, RPS3A, RPS4X, RPS5, RPS6, RPS7]
GO:0000377	RNA splicing, via transesterification reactions with bulged adenosine as nucleophile	GO_BiologicalProcess-EBI-UniProt-GOA_17.02.2020_00h00	1.56741e-10	2.97338e-07	6.53005e-42	3.20003e-40	[8, 9, 10]	Group48	12.8065	47	[BCAS2, CD2BP2, CELF1, CSTF3, DDX23, DDX39B, DDX42, DDX5, FUS, GTF2F1, HGS, HNRNPM, HNRNPU, HSP90B1, IK, KDM1A, MTREX, NONO, PCBP1, PCBP2, PCMT1, PDAP1, PNN, PRPF31, PRPF4, PSPC1, PUF60, RBM4, RBM4B, SF1, SF3B2, SFPQ, SNRNP40, SNRNP70, SNRPC, SRRM1, SRRM2, SRSF10, SRSF5, STMN1, SYMPK, U2AF1, U2AF1L4, USP39, WBP11, YBX1, ZCCHC8]
GO:0000398	mRNA splicing, via spliceosome	GO_BiologicalProcess-EBI-UniProt-GOA_17.02.2020_00h00	1.56741e-10	2.97338e-07	6.53005e-42	3.20003e-40	[7, 8, 9, 10, 11]	Group48	12.8065	47	[BCAS2, CD2BP2, CELF1, CSTF3, DDX23, DDX39B, DDX42, DDX5, FUS, GTF2F1, HGS, HNRNPM, HNRNPU, HSP90B1, IK, KDM1A, MTREX, NONO, PCBP1, PCBP2, PCMT1, PDAP1, PNN, PRPF31, PRPF4, PSPC1, PUF60, RBM4, RBM4B, SF1, SF3B2, SFPQ, SNRNP40, SNRNP70, SNRPC, SRRM1, SRRM2, SRSF10, SRSF5, STMN1, SYMPK, U2AF1, U2AF1L4, USP39, WBP11, YBX1, ZCCHC8]
GO:0006614	SRP-dependent cotranslational protein targeting to membrane	GO_BiologicalProcess-EBI-UniProt-GOA_17.02.2020_00h00	7.42066e-13	1.43441e-09	6.53005e-42	3.20003e-40	[7, 8, 9, 10, 11, 12]	Group48	23.1405	28	[RPL11, RPL12, RPL13, RPL17, RPL17-C18orf32, RPL19, RPL21, RPL23A, RPL27A, RPL31, RPL5, RPL6, RPL8, RPL9, RPLP2, RPS14, RPS2, RPS20, RPS26, RPS27, RPS3, RPS3A, RPS4X, RPS5, RPS6, RPS7, SEC61A1, SRPRA]
