# Supplementary material for: Ellagic Acid Triggers the Necrosis of Differentiated Human Enterocytes Exposed to 3-Nitro-Tyrosine: An MS-Based Proteomic Study
Source: Antioxidants (Basel). 2022 Dec 17;11(12):2485. doi: 10.3390/antiox11122485 (PMC9774974; doi:10.3390/antiox11122485)
Supplement: Supplementary file 1 [file antioxidants-11-02485-s001.zip › Table S8.xls]

## Sheet: ClueGO Results
ID	Term	Ontology Source	Term PValue	Term PValue Corrected with Bonferroni step down	Group PValue	Group PValue Corrected with Bonferroni step down	GOLevels	GOGroups	% Associated Genes	Nr. Genes	Associated Genes Found
GO:0003857	3-hydroxyacyl-CoA dehydrogenase activity	GO_MolecularFunction-EBI-UniProt-GOA_17.02.2020_00h00	2.29671e-05	0.0078088	2.29671e-05	6.89012e-05	[5]	Group00	55.5556	5	[CRYL1, HADHA, HADHB, HSD17B4, HSD17B8]
GO:0019904	protein domain specific binding	GO_MolecularFunction-EBI-UniProt-GOA_17.02.2020_00h00	1.37068e-07	4.98926e-05	1.37068e-07	2.05601e-06	[3]	Group01	8.46395	81	[ABI1, ACSL3, AGFG1, AIP, ARFIP1, ARFIP2, ATP1A1, ATP2B4, BAIAP2, BASP1, BAX, CACYBP, CALM1, CALM2, CALM3, CAMK2B, CAPG, CCDC6, CCT6A, CD2AP, CHMP1A, CHMP2A, CTNNB1, CTNND1, CXADR, DDX5, DNM2, EIF4E, EPB41L2, EPB41L5, EZR, F11R, FKBP8, GTF2F1, HGS, HNRNPM, HSP90AA1, HSP90AB1, HSP90AB2P, ILK, INPPL1, KHDRBS1, KPNB1, LIN7A, LIN7C, LLGL2, MAP2K2, MAVS, MECP2, MPP7, MRPS31, MTTP, NRBP1, NUP62, OCLN, …
GO:0043021	ribonucleoprotein complex binding	GO_MolecularFunction-EBI-UniProt-GOA_17.02.2020_00h00	4.92783e-06	0.00173952	4.92783e-06	3.94226e-05	[3]	Group02	13.75	22	[CD2BP2, DDX5, EEF2, EIF3A, ETF1, FMR1, HNRNPU, LARP1, LETM1, LONP1, MTIF2, NPM1, OLA1, OXA1L, PES1, PRPF31, PYM1, RPL13, SEC61A1, SNRPC, SRPRA, TIMM50]
GO:0043531	ADP binding	GO_MolecularFunction-EBI-UniProt-GOA_17.02.2020_00h00	6.60628e-08	2.43772e-05	6.60628e-08	1.057e-06	[4, 6, 7, 8]	Group03	26.9231	14	[ATP1A1, ATP5F1A, ATP5F1D, CHORDC1, COQ8A, H1-4, LONP1, MSH2, MYO18A, PKM, PPP5C, PRKAG1, RUVBL1, RUVBL2]
GO:0047485	protein N-terminus binding	GO_MolecularFunction-EBI-UniProt-GOA_17.02.2020_00h00	5.67165e-07	0.000204747	5.67165e-07	7.94031e-06	[3]	Group04	15.6028	22	[ACTN4, ARF6, CALM1, CALM2, CALM3, CAMK2B, EIF3E, HAX1, MECP2, PDCD10, PDCD6, PDLIM5, PEX14, PHB2, PICALM, RPL9, SCFD1, SLC9A3R1, SRC, SRRM2, STX5, TCOF1]
GO:0051082	unfolded protein binding	GO_MolecularFunction-EBI-UniProt-GOA_17.02.2020_00h00	7.31814e-13	2.78089e-10	7.31814e-13	1.68317e-11	[3]	Group05	20.122	33	[AFG3L2, AIP, CANX, CCDC115, CCT2, CCT3, CCT4, CCT5, CCT6A, CDC37, CLPX, CXADR, DNAJA3, DNAJB1, GRPEL1, HSP90AA1, HSP90AB1, HSP90AB2P, HSP90B1, HSPD1, LMAN1, MPP7, NPM1, NUDCD2, PFDN2, PFDN4, PFDN6, RUVBL2, SERPINH1, SRSF10, TCP1, TOMM20, TRAP1]
GO:0051117	ATPase binding	GO_MolecularFunction-EBI-UniProt-GOA_17.02.2020_00h00	1.03746e-06	0.000372448	1.03746e-06	1.14121e-05	[4]	Group06	16.8142	19	[ATP1B1, ATP1B3, ATP6V1E1, ATP6V1G1, CHMP4A, CHMP4B, CLPP, DNAJB1, EGFR, EZR, FBL, NOP58, RAC1, RALA, RALB, RUVBL1, RUVBL2, SRC, UBXN1]
GO:0004176	ATP-dependent peptidase activity	GO_MolecularFunction-EBI-UniProt-GOA_17.02.2020_00h00	2.22132e-05	0.0075747	2.22132e-05	8.88528e-05	[5, 9]	Group07	80	4	[CLPP, CLPX, LONP1, YME1L1]
GO:0000287	magnesium ion binding	GO_MolecularFunction-EBI-UniProt-GOA_17.02.2020_00h00	9.55383e-07	0.000343938	9.55383e-07	1.14646e-05	[5]	Group08	11.7438	33	[ALPP, COMT, DCTPP1, ENO1, FARSB, FEN1, HPRT1, IDH3A, IDH3B, IMPA1, MECP2, MSH2, MTTP, NDRG1, OPA1, PDAP1, PDCD6, PGM1, PKM, PNKP, PPA2, PRKACA, PRKACB, PRKCA, PRPSAP2, PSPH, RAN, RPL19, RPS6KA3, STK26, SYMPK, UBA2, USP39]
GO:0015288	porin activity	GO_MolecularFunction-EBI-UniProt-GOA_17.02.2020_00h00	6.41798e-05	0.0213719	6.41798e-05	6.41798e-05	[6]	Group09	66.6667	4	[TOMM40, VDAC1, VDAC2, VDAC3]
GO:0019843	rRNA binding	GO_MolecularFunction-EBI-UniProt-GOA_17.02.2020_00h00	5.32747e-08	1.97116e-05	5.32747e-08	9.0567e-07	[5]	Group10	22.3684	17	[DDX21, EEF2, IGF2BP3, MRPL11, MRPL16, RPF2, RPL11, RPL12, RPL17, RPL23A, RPL5, RPL8, RPL9, RPS14, RPS3, RPS4X, RPS5]
GO:0042625	ATPase-coupled ion transmembrane transporter activity	GO_MolecularFunction-EBI-UniProt-GOA_17.02.2020_00h00	6.12597e-05	0.020522	6.12597e-05	0.000122519	[5, 6]	Group11	17.6471	12	[ABCC3, ATP1A1, ATP1B1, ATP1B3, ATP2B4, ATP5F1B, ATP6V1A, ATP6V1B2, ATP6V1D, ATP6V1E1, ATP6V1G1, ATP6V1H]
GO:0019829	ATPase-coupled cation transmembrane transporter activity	GO_MolecularFunction-EBI-UniProt-GOA_17.02.2020_00h00	0.00013617	0.0442553	6.12597e-05	0.000122519	[5, 6, 7]	Group11	17.4603	11	[ATP1A1, ATP1B1, ATP1B3, ATP2B4, ATP5F1B, ATP6V1A, ATP6V1B2, ATP6V1D, ATP6V1E1, ATP6V1G1, ATP6V1H]
GO:0042802	identical protein binding	GO_MolecularFunction-EBI-UniProt-GOA_17.02.2020_00h00	6.14036e-13	2.35176e-10	6.14036e-13	1.53509e-11	[3]	Group12	7.77027	184	[ABCB10, ACAT1, ACSL5, ACTB, ACTG1, ACTN4, ADD1, AGFG1, AGR2, ALDH18A1, APPL1, APPL2, ARFIP2, ARID3A, ARRB1, ASS1, ATL2, BAIAP2, BAX, BIN1, BPNT1, CACYBP, CALM1, CALM3, CAMK2B, CAMK2G, CAPN5, CASP6, CD2AP, CDH17, CEACAM1, CEACAM6, CHMP1A, CHMP4A, CHMP4B, CHTOP, CLDN1, CLPP, COASY, CRYL1, CSRP1, CTNNA1, DARS2, DCTN2, DCTPP1, DDX21, DDX39B, DHRS4, DLAT, DNPH1, DPY30, DPYSL2, EGFR, EHD1, EIF2AK2, EI…
GO:0042803	protein homodimerization activity	GO_MolecularFunction-EBI-UniProt-GOA_17.02.2020_00h00	1.11178e-07	4.08022e-05	6.14036e-13	1.53509e-11	[4]	Group12	8.61505	79	[ACSL5, ACTN4, ADD1, AGFG1, APPL1, APPL2, ARRB1, BAX, CACYBP, CALM1, CALM3, CAMK2B, CAMK2G, CDH17, CEACAM1, CHMP1A, CHMP4A, CHMP4B, CHTOP, CRYL1, DARS2, DNPH1, DPY30, EIF2AK2, ENO1, F11R, FMR1, FXR2, GAMT, GRPEL1, HGS, HSD17B4, HSP90AA1, HSP90AB1, IGF2BP1, IGF2BP2, IGF2BP3, IMPA1, JUP, MSH2, MUC13, NADK2, NFS1, NPM1, NRBP1, OXA1L, PDCD10, PDCD6, PDCD6IP, PNKP, PRKRA, PSMF1, PSPH, PTMA, PVR, RBM14…
GO:0003676	nucleic acid binding	GO_MolecularFunction-EBI-UniProt-GOA_17.02.2020_00h00	3.18492e-09	1.19116e-06	3.18492e-09	6.36984e-08	[3]	Group13	6.23819	297	[ABCF1, ACIN1, ACTB, ACTN4, ADD1, ADNP, AGFG1, AHNAK, AKAP8L, ALDH18A1, ALDH6A1, ALPP, APPL2, ARID3A, ARRB1, ASS1, ATP5F1A, ATP5F1C, BASP1, BCLAF1, BTF3, CACYBP, CANX, CAST, CCT3, CCT4, CCT5, CCT6A, CDK11B, CEBPZ, CELF1, CHCHD2, CHCHD2P9, CHTOP, CKAP4, CORO7, CSRP1, CSTF3, CTNNA1, CUL4B, CXADR, DARS2, DDX10, DDX18, DDX19A, DDX21, DDX23, DDX27, DDX39B, DDX42, DDX47, DDX5, DDX50, DEK, DPEP1, EBNA1B…
GO:0003723	RNA binding	GO_MolecularFunction-EBI-UniProt-GOA_17.02.2020_00h00	0	0	3.18492e-09	6.36984e-08	[4]	Group13	12.1422	246	[ABCF1, ACIN1, ACTN4, ADD1, AGFG1, AHNAK, AKAP8L, ALDH18A1, ALDH6A1, ALPP, ASS1, ATP5F1A, ATP5F1C, BCLAF1, BTF3, CACYBP, CANX, CAST, CCT3, CCT4, CCT5, CCT6A, CDK11B, CEBPZ, CELF1, CHTOP, CKAP4, CSRP1, CSTF3, CTNNA1, DARS2, DDX10, DDX18, DDX19A, DDX21, DDX23, DDX27, DDX39B, DDX42, DDX47, DDX5, DDX50, DEK, EBNA1BP2, EEF1A1, EEF1A1P5, EEF1B2, EEF1D, EEF2, EIF2AK2, EIF2B1, EIF2S2, EIF3A, EIF3E, EIF3H…
GO:0044389	ubiquitin-like protein ligase binding	GO_MolecularFunction-EBI-UniProt-GOA_17.02.2020_00h00	2.2191e-08	8.23286e-06	2.2191e-08	4.21629e-07	[4]	Group14	11.3861	46	[ACTG1, AGFG1, ARRB1, CACYBP, CCT2, CDK5RAP3, CKB, CUL4B, DBT, DDRGK1, EGFR, ERLIN1, ERLIN2, FAF2, HGS, HSP90AA1, HSP90AB1, HSPD1, IGF2BP1, NPLOC4, OTUB1, PCBP2, PRKACA, PRKACB, PRKAR2A, PRKCA, PXN, RALA, RALB, RANGAP1, RBM14, RPL11, RPL17, RPL5, SCAMP3, SLC25A5, SNX9, SQSTM1, SRC, SRSF5, TCP1, TOLLIP, TRIM28, TSG101, TUBB, UBXN1]
GO:0031625	ubiquitin protein ligase binding	GO_MolecularFunction-EBI-UniProt-GOA_17.02.2020_00h00	2.30176e-07	8.35538e-05	2.2191e-08	4.21629e-07	[5]	Group14	10.9661	42	[ACTG1, AGFG1, ARRB1, CACYBP, CCT2, CKB, CUL4B, DBT, EGFR, ERLIN1, ERLIN2, FAF2, HSP90AA1, HSP90AB1, HSPD1, IGF2BP1, NPLOC4, OTUB1, PCBP2, PRKACA, PRKACB, PRKAR2A, PRKCA, PXN, RALA, RALB, RANGAP1, RBM14, RPL11, RPL17, RPL5, SCAMP3, SLC25A5, SNX9, SQSTM1, SRC, TCP1, TOLLIP, TRIM28, TSG101, TUBB, UBXN1]
GO:0016776	phosphotransferase activity, phosphate group as acceptor	GO_MolecularFunction-EBI-UniProt-GOA_17.02.2020_00h00	2.02469e-05	0.00696493	2.02469e-05	0.000101234	[4]	Group15	18.3099	13	[AK2, AK4, ATP5F1A, ATP5F1B, ATP5F1C, ATP5F1D, ATP5PB, ATP5PD, ATP5PO, DTYMK, MAVS, PNKP, SUCLG1]
GO:0046933	proton-transporting ATP synthase activity, rotational mechanism	GO_MolecularFunction-EBI-UniProt-GOA_17.02.2020_00h00	7.83281e-05	0.0259266	2.02469e-05	0.000101234	[5, 7, 8, 9]	Group15	29.1667	7	[ATP5F1A, ATP5F1B, ATP5F1C, ATP5F1D, ATP5PB, ATP5PD, ATP5PO]
GO:0000062	fatty-acyl-CoA binding	GO_MolecularFunction-EBI-UniProt-GOA_17.02.2020_00h00	1.35194e-05	0.00471828	5.69836e-07	7.40786e-06	[3, 4, 6, 7, 8]	Group16	27.2727	9	[ACAT1, ACAT2, ACBD3, ACBD5, ALDH6A1, DDX27, ECI2, GCDH, HADHA]
GO:0003988	acetyl-CoA C-acyltransferase activity	GO_MolecularFunction-EBI-UniProt-GOA_17.02.2020_00h00	7.78897e-05	0.0258594	5.69836e-07	7.40786e-06	[6]	Group16	45.4545	5	[ACAA1, ACAT1, ACAT2, HADHA, HADHB]
GO:0050839	cell adhesion molecule binding	GO_MolecularFunction-EBI-UniProt-GOA_17.02.2020_00h00	1.88881e-41	7.4796e-39	1.88881e-41	5.47749e-40	[3]	Group17	18.5241	123	[ABI1, ACTN4, ADD1, AFDN, AHNAK, ANK3, ARFIP2, ATP5PO, BAIAP2, BCAP31, BSG, CALM2, CALM3, CAPG, CAPZB, CAST, CCS, CD2AP, CD9, CDH17, CHMP4A, CHMP4B, CHMP5, COBLL1, CTNNA1, CTNNB1, CTNND1, CTTN, CXADR, DNAJB1, DSG2, EEF1D, EEF2, EFHD2, EGFR, EHD1, EHD4, EIF3E, EIF4G2, EIF5, ENO1, EPCAM, EZR, F11R, GPRC5A, H1-10, HSP90AA1, HSP90AB1, ILK, ITGA2, ITGAV, JUP, KIF5B, KRT18, LAD1, LARP1, LASP1, LDHA, LI…
GO:0045296	cadherin binding	GO_MolecularFunction-EBI-UniProt-GOA_17.02.2020_00h00	0	5.88545e-44	1.88881e-41	5.47749e-40	[4]	Group17	24.1935	105	[ABI1, ADD1, AFDN, AHNAK, ANK3, ARFIP2, BAIAP2, BCAP31, BSG, CALM2, CALM3, CAPG, CAPZB, CAST, CCS, CD2AP, CDH17, CHMP4A, CHMP4B, CHMP5, COBLL1, CTNNA1, CTNNB1, CTNND1, CTTN, DNAJB1, EEF1D, EEF2, EFHD2, EGFR, EHD1, EHD4, EIF3E, EIF4G2, EIF5, ENO1, EPCAM, EZR, F11R, GPRC5A, H1-10, HSP90AA1, HSP90AB1, JUP, KIF5B, KRT18, LAD1, LARP1, LASP1, LDHA, LIMA1, LRRC59, LYPLA2, MAPRE1, MPP7, NDRG1, NIBAN2, NO…
GO:0050662	coenzyme binding	GO_MolecularFunction-EBI-UniProt-GOA_17.02.2020_00h00	1.61174e-06	0.000577005	1.61174e-06	1.61174e-05	[3]	Group18	10.6849	39	[ACAD10, ACAT1, ACAT2, ACBD3, ACBD5, AGPS, ALDH6A1, ALDOC, CRYL1, DBT, DDX27, DHCR7, ECI2, ETFA, GCDH, GFER, GOT1, HADHA, HSD17B8, IDH3A, IDH3B, KDM1A, LDHA, MTARC2, NDUFA9, NFS1, NNT, PC, PDXDC1, PHGDH, PLOD3, PNKP, PRODH, SIRT2, SIRT3, SIRT5, SPAG9, TPMT, VDAC2]
GO:0051287	NAD binding	GO_MolecularFunction-EBI-UniProt-GOA_17.02.2020_00h00	8.21991e-05	0.0271257	1.61174e-06	1.61174e-05	[4, 5]	Group18	17.1429	12	[ALDOC, CRYL1, HADHA, HSD17B8, IDH3A, IDH3B, LDHA, NNT, PHGDH, SIRT2, SIRT3, SIRT5]
GO:0098632	cell-cell adhesion mediator activity	GO_MolecularFunction-EBI-UniProt-GOA_17.02.2020_00h00	3.95537e-06	0.00140416	3.95537e-06	3.55983e-05	[3]	Group19	19.7183	14	[BAIAP2, BSG, CXADR, DSG2, EPCAM, JUP, KRT18, NPTN, PDLIM5, PKP2, PKP3, RAB10, RPL9, TMOD3]
GO:0098641	cadherin binding involved in cell-cell adhesion	GO_MolecularFunction-EBI-UniProt-GOA_17.02.2020_00h00	7.90015e-06	0.00277295	3.95537e-06	3.55983e-05	[4, 5]	Group19	33.3333	8	[BAIAP2, EPCAM, KRT18, PDLIM5, PKP3, RAB10, RPL9, TMOD3]
GO:0016875	ligase activity, forming carbon-oxygen bonds	GO_MolecularFunction-EBI-UniProt-GOA_17.02.2020_00h00	1.75024e-05	0.00607332	1.75024e-05	0.000105014	[3]	Group20	21.5686	11	[DARS2, FARSB, HGS, IARS2, LRRC47, MARS1, NARS1, RARS1, SRSF5, WARS2, YARS2]
GO:0004812	aminoacyl-tRNA ligase activity	GO_MolecularFunction-EBI-UniProt-GOA_17.02.2020_00h00	1.75024e-05	0.00607332	1.75024e-05	0.000105014	[4]	Group20	21.5686	11	[DARS2, FARSB, HGS, IARS2, LRRC47, MARS1, NARS1, RARS1, SRSF5, WARS2, YARS2]
GO:0008092	cytoskeletal protein binding	GO_MolecularFunction-EBI-UniProt-GOA_17.02.2020_00h00	1.7677e-14	6.78798e-12	1.7677e-14	4.59603e-13	[3]	Group21	9.6248	118	[ABI1, ABRAXAS2, ACTB, ACTC1, ACTN4, ADD1, ADNP, AFDN, ALDOC, ALPP, ANK3, APPL1, ATP1A1, BAIAP2, BCAP31, BIN1, BPNT1, CACYBP, CALM1, CALM2, CALM3, CAMK2B, CAPG, CAPZB, CCT5, CDH17, CDK5, CEACAM1, CETN2, CFL2, CHORDC1, COBLL1, CORO7, CORO7-PAM16, CSRP1, CTNNA1, CTTN, DCTN1, DCTN2, DNM2, DPYSL2, EEF2, EGFR, EIF4G2, EPB41L1, EPB41L2, EPB41L5, EPS8, EPS8L3, EZR, FCHO2, FDPS, FMR1, FUS, GALK1, GFER, G…
GO:0003779	actin binding	GO_MolecularFunction-EBI-UniProt-GOA_17.02.2020_00h00	9.04829e-08	3.32977e-05	1.7677e-14	4.59603e-13	[4]	Group21	9.96377	55	[ACTN4, ADD1, AFDN, ALPP, BCAP31, BIN1, BPNT1, CALM1, CALM3, CAMK2B, CAPG, CAPZB, CEACAM1, CFL2, COBLL1, CORO7, CORO7-PAM16, CTNNA1, CTTN, EEF2, EGFR, EIF4G2, EPB41L1, EPB41L2, EPS8, EPS8L3, EZR, HNRNPU, INPPL1, IQGAP2, LASP1, LIMA1, MARCKS, MARCKSL1, MISP, MMAB, MTTP, MYO18A, MYO1A, MYO1C, PDLIM5, PLS1, PTMA, RPL9, SHTN1, SNTB1, SORBS1, SSH3, TMOD3, TPM1, TPM3, USO1, VIL1, WASF2, WASL]
GO:0051015	actin filament binding	GO_MolecularFunction-EBI-UniProt-GOA_17.02.2020_00h00	1.13874e-07	4.16779e-05	1.7677e-14	4.59603e-13	[3, 5]	Group21	13.1148	32	[ACTN4, ADD1, AFDN, BIN1, CAPG, CAPZB, CFL2, CORO7, CORO7-PAM16, CTNNA1, CTTN, EEF2, EGFR, EZR, IQGAP2, LASP1, LIMA1, MARCKS, MISP, MMAB, MTTP, MYO18A, MYO1A, MYO1C, PLS1, PTMA, SHTN1, TPM1, TPM3, VIL1, WASF2, WASL]
GO:0034237	protein kinase A regulatory subunit binding	GO_MolecularFunction-EBI-UniProt-GOA_17.02.2020_00h00	4.18701e-05	0.0141102	7.68359e-06	5.37851e-05	[4]	Group22	31.8182	7	[ACBD3, AKAP8L, EZR, PRKACA, PRKACB, PRKCA, PRRC1]
GO:0004690	cyclic nucleotide-dependent protein kinase activity	GO_MolecularFunction-EBI-UniProt-GOA_17.02.2020_00h00	0.000128423	0.041866	7.68359e-06	5.37851e-05	[5, 7]	Group22	41.6667	5	[PRKAA1, PRKACA, PRKACB, PRKAG1, PRKCA]
GO:0004691	cAMP-dependent protein kinase activity	GO_MolecularFunction-EBI-UniProt-GOA_17.02.2020_00h00	4.41751e-05	0.0148428	7.68359e-06	5.37851e-05	[6, 8]	Group22	50	5	[PRKAA1, PRKACA, PRKACB, PRKAG1, PRKCA]
GO:0003729	mRNA binding	GO_MolecularFunction-EBI-UniProt-GOA_17.02.2020_00h00	6.64128e-13	2.53697e-10	6.64128e-13	1.59391e-11	[5]	Group23	14.3258	51	[CACYBP, CCT5, CELF1, CSTF3, DDX5, EIF2B1, EIF2S2, EIF3A, EIF4A1, EIF4A2, EIF4E, EIF4G2, ETF1, FMR1, FUS, FXR2, G3BP2, GNL3, HGS, HNRNPM, HNRNPU, IGF2BP1, IGF2BP2, IGF2BP3, KHSRP, LARP1, MATR3, MECP2, NCL, NUP98, PCBP1, RBM14, RBM4, RBM4B, RPL12, RPL5, RPS14, RPS2, RPS26, RPS26P11, RPS3, RPS3A, RPS4X, RPS5, RPS7, SNRNP70, SNRPC, SRRM2, SRSF5, USO1, YBX1]
GO:0003730	mRNA 3'-UTR binding	GO_MolecularFunction-EBI-UniProt-GOA_17.02.2020_00h00	9.05052e-05	0.0297762	6.64128e-13	1.59391e-11	[6]	Group23	13.7931	16	[CCT5, DDX5, ETF1, FMR1, FUS, FXR2, HNRNPU, IGF2BP1, IGF2BP2, IGF2BP3, KHSRP, LARP1, RBM4, RPL12, RPL5, RPS7]
GO:0048027	mRNA 5'-UTR binding	GO_MolecularFunction-EBI-UniProt-GOA_17.02.2020_00h00	1.1213e-08	4.17123e-06	6.64128e-13	1.59391e-11	[6]	Group23	33.3333	13	[CCT5, FMR1, GNL3, IGF2BP1, IGF2BP2, IGF2BP3, LARP1, NCL, RPL12, RPL5, RPS14, RPS3A, RPS7]
GO:0019899	enzyme binding	GO_MolecularFunction-EBI-UniProt-GOA_17.02.2020_00h00	1.05724e-15	4.07039e-13	1.05724e-15	2.85456e-14	[3]	Group24	7.79734	217	[ABHD14B, ACAT1, ACIN1, ACSL3, ACTA2, ACTB, ACTG1, ADRM1, AFDN, AGFG1, AKAP8L, ALPP, AP3B1, APPL1, ARF6, ARFIP2, ARHGDIA, ARRB1, ATP1A1, ATP1B1, ATP1B3, ATP2B4, ATP6V1E1, ATP6V1G1, BIN1, CACYBP, CALM1, CALM2, CALM3, CAMK2B, CAST, CCT2, CDC37, CDK5, CDK5RAP3, CEACAM1, CHCHD3, CHMP4A, CHMP4B, CHORDC1, CHTOP, CKB, CLPP, CORO7, CTNNB1, CTNND1, CUL4B, DBT, DCTN1, DCTN2, DDRGK1, DDX5, DNAJB1, DNM2, DPY…
GO:0019900	kinase binding	GO_MolecularFunction-EBI-UniProt-GOA_17.02.2020_00h00	6.68942e-13	2.54867e-10	1.05724e-15	2.85456e-14	[4]	Group24	9.97963	98	[ABHD14B, ACSL3, ACTA2, ACTB, APPL1, ARHGDIA, ARRB1, ATP1A1, ATP1B1, ATP2B4, CALM1, CALM2, CALM3, CAMK2B, CDC37, CDK5, CDK5RAP3, CEACAM1, CHORDC1, CHTOP, CTNNB1, CTNND1, DCTN1, DCTN2, DNM2, DPYSL2, EEF1A1, EEF2, EGFR, EIF3A, EZR, GFER, HGS, HSP90AA1, HSP90AB1, ILK, ITGAV, JUP, KIF5B, LDHA, LLGL2, MAP2K2, MAPK1, MAPRE1, MARCKS, MAVS, MOB1B, MSH2, MTTP, NDRG1, NPM1, NRBP1, OPA1, PAK1, PAK2, PARD6B,…
GO:0019901	protein kinase binding	GO_MolecularFunction-EBI-UniProt-GOA_17.02.2020_00h00	2.74596e-12	1.04072e-09	1.05724e-15	2.85456e-14	[5]	Group24	10.1367	89	[ABHD14B, ACSL3, ACTA2, ACTB, APPL1, ARHGDIA, ARRB1, ATP1A1, ATP1B1, ATP2B4, CALM1, CALM2, CALM3, CAMK2B, CDC37, CDK5, CDK5RAP3, CEACAM1, CHTOP, CTNNB1, CTNND1, DCTN1, DCTN2, DNM2, DPYSL2, EEF1A1, EEF2, EGFR, EIF3A, EZR, GFER, HGS, HSP90AA1, HSP90AB1, ILK, ITGAV, JUP, KIF5B, LLGL2, MAPK1, MAPRE1, MARCKS, MAVS, MSH2, MTTP, NDRG1, NPM1, NRBP1, PAK1, PAK2, PARD6B, PDCD10, PDCD6IP, PDLIM5, PICALM, PK…
GO:0031369	translation initiation factor binding	GO_MolecularFunction-EBI-UniProt-GOA_17.02.2020_00h00	0.000107378	0.0351127	5.4632e-10	1.2019e-08	[3]	Group25	21.4286	9	[CELF1, EIF2B1, EIF2S2, EIF3M, EIF4A2, EIF4E, EIF5, FMR1, LARP1]
GO:0090079	translation regulator activity, nucleic acid binding	GO_MolecularFunction-EBI-UniProt-GOA_17.02.2020_00h00	4.70307e-11	1.77306e-08	5.4632e-10	1.2019e-08	[2, 4]	Group25	20	28	[ABCF1, CELF1, EEF1A1, EEF1A1P5, EEF1B2, EEF1D, EEF2, EIF2B1, EIF2S2, EIF3A, EIF3E, EIF3H, EIF3J, EIF3M, EIF4A1, EIF4A2, EIF4B, EIF4E, EIF4G2, EIF5, ETF1, GFM2, LARP1, MTIF2, RPS27L, SLC16A1, TSFM, TUFM]
GO:0008135	translation factor activity, RNA binding	GO_MolecularFunction-EBI-UniProt-GOA_17.02.2020_00h00	2.7801e-11	1.05088e-08	5.4632e-10	1.2019e-08	[3, 5]	Group25	22.7273	25	[ABCF1, EEF1A1, EEF1A1P5, EEF1B2, EEF1D, EEF2, EIF2B1, EIF2S2, EIF3A, EIF3E, EIF3H, EIF3J, EIF3M, EIF4A1, EIF4A2, EIF4B, EIF4E, EIF4G2, EIF5, ETF1, GFM2, MTIF2, SLC16A1, TSFM, TUFM]
GO:0003743	translation initiation factor activity	GO_MolecularFunction-EBI-UniProt-GOA_17.02.2020_00h00	1.34078e-07	4.89384e-05	5.4632e-10	1.2019e-08	[4, 6]	Group25	23.8095	15	[EIF2B1, EIF2S2, EIF3A, EIF3E, EIF3H, EIF3J, EIF3M, EIF4A1, EIF4A2, EIF4B, EIF4E, EIF4G2, EIF5, MTIF2, SLC16A1]
GO:0003746	translation elongation factor activity	GO_MolecularFunction-EBI-UniProt-GOA_17.02.2020_00h00	6.34502e-05	0.0211924	5.4632e-10	1.2019e-08	[4, 6]	Group25	25.8065	8	[EEF1A1, EEF1A1P5, EEF1B2, EEF1D, EEF2, GFM2, TSFM, TUFM]
GO:0030235	nitric-oxide synthase regulator activity	GO_MolecularFunction-EBI-UniProt-GOA_17.02.2020_00h00	2.92628e-07	0.000105931	4.07193e-08	7.32947e-07	[3]	Group26	58.3333	7	[ATP2B4, CALM1, CALM2, CALM3, EGFR, HSP90AA1, HSP90AB1]
GO:0010856	adenylate cyclase activator activity	GO_MolecularFunction-EBI-UniProt-GOA_17.02.2020_00h00	7.14245e-06	0.00251414	4.07193e-08	7.32947e-07	[4]	Group26	50	6	[CALM1, CALM2, CALM3, CAMK2B, GNAS, PICALM]
GO:0031997	N-terminal myristoylation domain binding	GO_MolecularFunction-EBI-UniProt-GOA_17.02.2020_00h00	4.13933e-06	0.00146532	4.07193e-08	7.32947e-07	[4]	Group26	71.4286	5	[CALM1, CALM2, CALM3, CAMK2B, PICALM]
GO:0048156	tau protein binding	GO_MolecularFunction-EBI-UniProt-GOA_17.02.2020_00h00	1.14895e-05	0.00402131	4.07193e-08	7.32947e-07	[4]	Group26	20.6897	12	[ACTB, BIN1, CALM2, CALM3, CDK5, DCTN1, HSP90AA1, HSP90AB1, PICALM, PPP5C, PRKAA1, USP39]
GO:0097718	disordered domain specific binding	GO_MolecularFunction-EBI-UniProt-GOA_17.02.2020_00h00	2.57341e-05	0.00872386	4.07193e-08	7.32947e-07	[4]	Group26	20.7547	11	[CALM1, CALM2, CALM3, CAMK2B, CTNNB1, EZR, FKBP8, HSP90AA1, HSP90AB1, HSP90AB2P, PICALM]
GO:0031800	type 3 metabotropic glutamate receptor binding	GO_MolecularFunction-EBI-UniProt-GOA_17.02.2020_00h00	9.97112e-05	0.0327053	4.07193e-08	7.32947e-07	[6]	Group26	100	3	[CALM1, CALM2, CALM3]
GO:0016817	hydrolase activity, acting on acid anhydrides	GO_MolecularFunction-EBI-UniProt-GOA_17.02.2020_00h00	1.55456e-09	5.82958e-07	1.55456e-09	3.26457e-08	[3]	Group27	8.92338	92	[ABCB10, ABCB7, ABCC3, ABCF1, ACIN1, ACTC1, ARF6, ATAD1, ATL2, ATP1B1, ATP5F1A, ATP5F1B, ATP5F1C, ATP5F1D, ATP6V1G1, ATP6V1H, CLPB, CLPP, CLPX, DCTN1, DCTN2, DCTPP1, DDX10, DDX18, DDX19A, DDX21, DDX23, DDX27, DDX39B, DDX42, DDX47, DDX5, DDX50, DNM2, DOLPP1, EEF1A1, EEF1A1P5, EEF2, EIF4A1, EIF4A2, EIF4E, EIF5, GET3, GFM2, GMPS, GNA11, GNAS, GNB1, HSP90AA1, HSP90AB1, HSPD1, ITPA, KALRN, KIF5B, KLC4…
GO:0016818	hydrolase activity, acting on acid anhydrides, in phosphorus-containing anhydrides	GO_MolecularFunction-EBI-UniProt-GOA_17.02.2020_00h00	1.55456e-09	5.82958e-07	1.55456e-09	3.26457e-08	[4]	Group27	8.92338	92	[ABCB10, ABCB7, ABCC3, ABCF1, ACIN1, ACTC1, ARF6, ATAD1, ATL2, ATP1B1, ATP5F1A, ATP5F1B, ATP5F1C, ATP5F1D, ATP6V1G1, ATP6V1H, CLPB, CLPP, CLPX, DCTN1, DCTN2, DCTPP1, DDX10, DDX18, DDX19A, DDX21, DDX23, DDX27, DDX39B, DDX42, DDX47, DDX5, DDX50, DNM2, DOLPP1, EEF1A1, EEF1A1P5, EEF2, EIF4A1, EIF4A2, EIF4E, EIF5, GET3, GFM2, GMPS, GNA11, GNAS, GNB1, HSP90AA1, HSP90AB1, HSPD1, ITPA, KALRN, KIF5B, KLC4…
GO:0016462	pyrophosphatase activity	GO_MolecularFunction-EBI-UniProt-GOA_17.02.2020_00h00	9.54375e-10	3.58845e-07	1.55456e-09	3.26457e-08	[5]	Group27	8.95813	92	[ABCB10, ABCB7, ABCC3, ABCF1, ACIN1, ACTC1, ARF6, ATAD1, ATL2, ATP1B1, ATP5F1A, ATP5F1B, ATP5F1C, ATP5F1D, ATP6V1G1, ATP6V1H, CLPB, CLPP, CLPX, DCTN1, DCTN2, DCTPP1, DDX10, DDX18, DDX19A, DDX21, DDX23, DDX27, DDX39B, DDX42, DDX47, DDX5, DDX50, DNM2, DOLPP1, EEF1A1, EEF1A1P5, EEF2, EIF4A1, EIF4A2, EIF4E, EIF5, GET3, GFM2, GMPS, GNA11, GNAS, GNB1, HSP90AA1, HSP90AB1, HSPD1, ITPA, KALRN, KIF5B, KLC4…
GO:0017111	nucleoside-triphosphatase activity	GO_MolecularFunction-EBI-UniProt-GOA_17.02.2020_00h00	5.43856e-09	2.02858e-06	1.55456e-09	3.26457e-08	[6]	Group27	8.92116	86	[ABCB10, ABCB7, ABCC3, ABCF1, ACIN1, ACTC1, ARF6, ATAD1, ATL2, ATP1B1, ATP5F1A, ATP5F1B, ATP5F1C, ATP5F1D, ATP6V1G1, ATP6V1H, CLPB, CLPP, CLPX, DCTN1, DCTN2, DDX10, DDX18, DDX19A, DDX21, DDX23, DDX27, DDX39B, DDX42, DDX47, DDX5, DDX50, DNM2, EEF1A1, EEF1A1P5, EEF2, EIF4A1, EIF4A2, EIF4E, EIF5, GET3, GFM2, GNA11, GNAS, GNB1, HSP90AA1, HSP90AB1, HSPD1, KALRN, KIF5B, KLC4, LONP1, MARCKSL1, MSH2, MTI…
GO:0003724	RNA helicase activity	GO_MolecularFunction-EBI-UniProt-GOA_17.02.2020_00h00	2.53509e-06	0.000905028	1.55456e-09	3.26457e-08	[3, 10]	Group27	18.1818	16	[DDX10, DDX18, DDX19A, DDX21, DDX23, DDX27, DDX39B, DDX42, DDX47, DDX5, DDX50, EIF4A1, EIF4A2, EIF4E, MTREX, SUPV3L1]
GO:0016887	ATPase activity	GO_MolecularFunction-EBI-UniProt-GOA_17.02.2020_00h00	2.92396e-06	0.00104093	1.55456e-09	3.26457e-08	[7]	Group27	9.34579	50	[ABCB10, ABCB7, ABCC3, ABCF1, ACIN1, ACTC1, ATAD1, ATP1B1, ATP5F1A, ATP5F1B, ATP5F1C, ATP5F1D, ATP6V1G1, ATP6V1H, CLPB, CLPP, CLPX, DDX10, DDX18, DDX19A, DDX21, DDX23, DDX27, DDX39B, DDX42, DDX47, DDX5, DDX50, EIF4A1, EIF4A2, EIF4E, GET3, HSP90AA1, HSP90AB1, HSPD1, KALRN, KIF5B, LONP1, MARCKSL1, MSH2, MTREX, MYO18A, MYO1C, OLA1, PSMC6, RFC4, RUVBL1, RUVBL2, SUPV3L1, YME1L1]
GO:0001882	nucleoside binding	GO_MolecularFunction-EBI-UniProt-GOA_17.02.2020_00h00	1.79745e-05	0.00621919	6.99146e-24	1.95761e-22	[3]	Group28	9.20771	43	[ACTN4, AK4, ARF6, ARFIP2, ATL2, DNM2, EEF1A1, EEF1A1P5, EEF2, EHD1, EHD4, EIF5, GFM2, GNA11, GNAS, GNL3, H1-4, HSP90AB1, MTIF2, NDRG1, OLA1, OPA1, PCK2, RAB10, RAB1B, RAB1C, RAB25, RAB6C, RAB8A, RAB9A, RAC1, RALA, RALB, RAN, RHOG, SEPHS1, SRM, SRPRA, SRPRB, TUBB, TUBB6, TUBB8, TUFM]
GO:0016817	hydrolase activity, acting on acid anhydrides	GO_MolecularFunction-EBI-UniProt-GOA_17.02.2020_00h00	1.55456e-09	5.82958e-07	6.99146e-24	1.95761e-22	[3]	Group28	8.92338	92	[ABCB10, ABCB7, ABCC3, ABCF1, ACIN1, ACTC1, ARF6, ATAD1, ATL2, ATP1B1, ATP5F1A, ATP5F1B, ATP5F1C, ATP5F1D, ATP6V1G1, ATP6V1H, CLPB, CLPP, CLPX, DCTN1, DCTN2, DCTPP1, DDX10, DDX18, DDX19A, DDX21, DDX23, DDX27, DDX39B, DDX42, DDX47, DDX5, DDX50, DNM2, DOLPP1, EEF1A1, EEF1A1P5, EEF2, EIF4A1, EIF4A2, EIF4E, EIF5, GET3, GFM2, GMPS, GNA11, GNAS, GNB1, HSP90AA1, HSP90AB1, HSPD1, ITPA, KALRN, KIF5B, KLC4…
GO:0043168	anion binding	GO_MolecularFunction-EBI-UniProt-GOA_17.02.2020_00h00	5.04248e-20	1.96657e-17	6.99146e-24	1.95761e-22	[3]	Group28	7.83274	266	[ABCB10, ABCB7, ABCC3, ABCF1, ACAD10, ACAT1, ACAT2, ACBD3, ACBD5, ACSL3, ACSL5, ACTA2, ACTB, ACTC1, ACTG1, ACTG2, AFG3L2, AGFG1, AGPS, AK2, AK4, ALDH18A1, ALDH6A1, ALPP, ANXA13, APPL1, APPL2, APRT, ARF6, ARFIP1, ARFIP2, ARHGDIA, ASS1, ATAD1, ATAD3A, ATL2, ATP1A1, ATP1B1, ATP2B4, ATP5F1A, ATP5F1B, ATP5F1D, ATP6V1A, ATP6V1B2, ATP6V1H, BIN1, CALM1, CALM2, CALM3, CAMK2B, CAMK2G, CCDC6, CCT2, CCT3, CC…
GO:1901265	nucleoside phosphate binding	GO_MolecularFunction-EBI-UniProt-GOA_17.02.2020_00h00	4.67935e-28	1.84367e-25	6.99146e-24	1.95761e-22	[3]	Group28	9.26641	240	[ABCB10, ABCB7, ABCC3, ABCF1, ACAD10, ACAT1, ACAT2, ACBD3, ACBD5, ACSL3, ACSL5, ACTA2, ACTB, ACTC1, ACTG1, ACTG2, AFG3L2, AGFG1, AGPS, AK2, AK4, ALDH18A1, ALDH6A1, ALDOC, ALPP, APRT, ARF6, ARFIP2, ASS1, ATAD1, ATAD3A, ATL2, ATP1A1, ATP1B1, ATP2B4, ATP5F1A, ATP5F1B, ATP5F1D, ATP6V1A, ATP6V1B2, ATP6V1H, CALM1, CALM3, CAMK2B, CAMK2G, CCDC6, CCT2, CCT3, CCT4, CCT5, CCT6A, CDK11A, CDK11B, CDK5, CHORDC…
GO:0000166	nucleotide binding	GO_MolecularFunction-EBI-UniProt-GOA_17.02.2020_00h00	4.49127e-28	1.77405e-25	6.99146e-24	1.95761e-22	[3, 4]	Group28	9.26999	240	[ABCB10, ABCB7, ABCC3, ABCF1, ACAD10, ACAT1, ACAT2, ACBD3, ACBD5, ACSL3, ACSL5, ACTA2, ACTB, ACTC1, ACTG1, ACTG2, AFG3L2, AGFG1, AGPS, AK2, AK4, ALDH18A1, ALDH6A1, ALDOC, ALPP, APRT, ARF6, ARFIP2, ASS1, ATAD1, ATAD3A, ATL2, ATP1A1, ATP1B1, ATP2B4, ATP5F1A, ATP5F1B, ATP5F1D, ATP6V1A, ATP6V1B2, ATP6V1H, CALM1, CALM3, CAMK2B, CAMK2G, CCDC6, CCT2, CCT3, CCT4, CCT5, CCT6A, CDK11A, CDK11B, CDK5, CHORDC…
GO:0001883	purine nucleoside binding	GO_MolecularFunction-EBI-UniProt-GOA_17.02.2020_00h00	2.15412e-05	0.00736711	6.99146e-24	1.95761e-22	[4]	Group28	9.2511	42	[AK4, ARF6, ARFIP2, ATL2, DNM2, EEF1A1, EEF1A1P5, EEF2, EHD1, EHD4, EIF5, GFM2, GNA11, GNAS, GNL3, H1-4, HSP90AB1, MTIF2, NDRG1, OLA1, OPA1, PCK2, RAB10, RAB1B, RAB1C, RAB25, RAB6C, RAB8A, RAB9A, RAC1, RALA, RALB, RAN, RHOG, SEPHS1, SRM, SRPRA, SRPRB, TUBB, TUBB6, TUBB8, TUFM]
GO:0016818	hydrolase activity, acting on acid anhydrides, in phosphorus-containing anhydrides	GO_MolecularFunction-EBI-UniProt-GOA_17.02.2020_00h00	1.55456e-09	5.82958e-07	6.99146e-24	1.95761e-22	[4]	Group28	8.92338	92	[ABCB10, ABCB7, ABCC3, ABCF1, ACIN1, ACTC1, ARF6, ATAD1, ATL2, ATP1B1, ATP5F1A, ATP5F1B, ATP5F1C, ATP5F1D, ATP6V1G1, ATP6V1H, CLPB, CLPP, CLPX, DCTN1, DCTN2, DCTPP1, DDX10, DDX18, DDX19A, DDX21, DDX23, DDX27, DDX39B, DDX42, DDX47, DDX5, DDX50, DNM2, DOLPP1, EEF1A1, EEF1A1P5, EEF2, EIF4A1, EIF4A2, EIF4E, EIF5, GET3, GFM2, GMPS, GNA11, GNAS, GNB1, HSP90AA1, HSP90AB1, HSPD1, ITPA, KALRN, KIF5B, KLC4…
GO:0032549	ribonucleoside binding	GO_MolecularFunction-EBI-UniProt-GOA_17.02.2020_00h00	2.08201e-05	0.00714129	6.99146e-24	1.95761e-22	[4]	Group28	9.27152	42	[AK4, ARF6, ARFIP2, ATL2, DNM2, EEF1A1, EEF1A1P5, EEF2, EHD1, EHD4, EIF5, GFM2, GNA11, GNAS, GNL3, H1-4, HSP90AB1, MTIF2, NDRG1, OLA1, OPA1, PCK2, RAB10, RAB1B, RAB1C, RAB25, RAB6C, RAB8A, RAB9A, RAC1, RALA, RALB, RAN, RHOG, SEPHS1, SRM, SRPRA, SRPRB, TUBB, TUBB6, TUBB8, TUFM]
GO:0032553	ribonucleotide binding	GO_MolecularFunction-EBI-UniProt-GOA_17.02.2020_00h00	3.94479e-22	1.54241e-19	6.99146e-24	1.95761e-22	[3, 4, 5]	Group28	9	207	[ABCB10, ABCB7, ABCC3, ABCF1, ACAT1, ACAT2, ACBD3, ACBD5, ACSL3, ACSL5, ACTA2, ACTB, ACTC1, ACTG1, ACTG2, AFG3L2, AGFG1, AK2, AK4, ALDH18A1, ALDH6A1, ALPP, APRT, ARF6, ARFIP2, ASS1, ATAD1, ATAD3A, ATL2, ATP1A1, ATP1B1, ATP2B4, ATP5F1A, ATP5F1B, ATP5F1D, ATP6V1A, ATP6V1B2, ATP6V1H, CALM1, CALM3, CAMK2B, CAMK2G, CCDC6, CCT2, CCT3, CCT4, CCT5, CCT6A, CDK11A, CDK11B, CDK5, CHORDC1, CKB, CLPB, CLPX, C…
GO:0035639	purine ribonucleoside triphosphate binding	GO_MolecularFunction-EBI-UniProt-GOA_17.02.2020_00h00	8.88339e-20	3.45564e-17	6.99146e-24	1.95761e-22	[4]	Group28	8.8706	194	[ABCB10, ABCB7, ABCC3, ABCF1, ACSL3, ACSL5, ACTA2, ACTB, ACTC1, ACTG1, ACTG2, AFG3L2, AGFG1, AK2, AK4, ALDH18A1, ALPP, ARF6, ARFIP2, ASS1, ATAD1, ATAD3A, ATL2, ATP1A1, ATP1B1, ATP2B4, ATP5F1A, ATP5F1B, ATP5F1D, ATP6V1A, ATP6V1B2, ATP6V1H, CALM1, CALM3, CAMK2B, CAMK2G, CCDC6, CCT2, CCT3, CCT4, CCT5, CCT6A, CDK11A, CDK11B, CDK5, CHORDC1, CKB, CLPB, CLPX, COASY, COQ8A, CPS1, CSNK1A1, CXADR, DARS2, D…
GO:0017076	purine nucleotide binding	GO_MolecularFunction-EBI-UniProt-GOA_17.02.2020_00h00	1.25606e-22	4.93633e-20	6.99146e-24	1.95761e-22	[4, 5]	Group28	9.05923	208	[ABCB10, ABCB7, ABCC3, ABCF1, ACAT1, ACAT2, ACBD3, ACBD5, ACSL3, ACSL5, ACTA2, ACTB, ACTC1, ACTG1, ACTG2, AFG3L2, AGFG1, AK2, AK4, ALDH18A1, ALDH6A1, ALPP, APRT, ARF6, ARFIP2, ASS1, ATAD1, ATAD3A, ATL2, ATP1A1, ATP1B1, ATP2B4, ATP5F1A, ATP5F1B, ATP5F1D, ATP6V1A, ATP6V1B2, ATP6V1H, CALM1, CALM3, CAMK2B, CAMK2G, CCDC6, CCT2, CCT3, CCT4, CCT5, CCT6A, CDK11A, CDK11B, CDK5, CHORDC1, CKB, CLPB, CLPX, C…
GO:0016462	pyrophosphatase activity	GO_MolecularFunction-EBI-UniProt-GOA_17.02.2020_00h00	9.54375e-10	3.58845e-07	6.99146e-24	1.95761e-22	[5]	Group28	8.95813	92	[ABCB10, ABCB7, ABCC3, ABCF1, ACIN1, ACTC1, ARF6, ATAD1, ATL2, ATP1B1, ATP5F1A, ATP5F1B, ATP5F1C, ATP5F1D, ATP6V1G1, ATP6V1H, CLPB, CLPP, CLPX, DCTN1, DCTN2, DCTPP1, DDX10, DDX18, DDX19A, DDX21, DDX23, DDX27, DDX39B, DDX42, DDX47, DDX5, DDX50, DNM2, DOLPP1, EEF1A1, EEF1A1P5, EEF2, EIF4A1, EIF4A2, EIF4E, EIF5, GET3, GFM2, GMPS, GNA11, GNAS, GNB1, HSP90AA1, HSP90AB1, HSPD1, ITPA, KALRN, KIF5B, KLC4…
GO:0032550	purine ribonucleoside binding	GO_MolecularFunction-EBI-UniProt-GOA_17.02.2020_00h00	1.89457e-05	0.00653628	6.99146e-24	1.95761e-22	[5]	Group28	9.33333	42	[AK4, ARF6, ARFIP2, ATL2, DNM2, EEF1A1, EEF1A1P5, EEF2, EHD1, EHD4, EIF5, GFM2, GNA11, GNAS, GNL3, H1-4, HSP90AB1, MTIF2, NDRG1, OLA1, OPA1, PCK2, RAB10, RAB1B, RAB1C, RAB25, RAB6C, RAB8A, RAB9A, RAC1, RALA, RALB, RAN, RHOG, SEPHS1, SRM, SRPRA, SRPRB, TUBB, TUBB6, TUBB8, TUFM]
GO:0032555	purine ribonucleotide binding	GO_MolecularFunction-EBI-UniProt-GOA_17.02.2020_00h00	2.81647e-22	1.10406e-19	6.99146e-24	1.95761e-22	[4, 5, 6]	Group28	9.03905	206	[ABCB10, ABCB7, ABCC3, ABCF1, ACAT1, ACAT2, ACBD3, ACBD5, ACSL3, ACSL5, ACTA2, ACTB, ACTC1, ACTG1, ACTG2, AFG3L2, AGFG1, AK2, AK4, ALDH18A1, ALDH6A1, ALPP, APRT, ARF6, ARFIP2, ASS1, ATAD1, ATAD3A, ATL2, ATP1A1, ATP1B1, ATP2B4, ATP5F1A, ATP5F1B, ATP5F1D, ATP6V1A, ATP6V1B2, ATP6V1H, CALM1, CALM3, CAMK2B, CAMK2G, CCDC6, CCT2, CCT3, CCT4, CCT5, CCT6A, CDK11A, CDK11B, CDK5, CHORDC1, CKB, CLPB, CLPX, C…
GO:0019001	guanyl nucleotide binding	GO_MolecularFunction-EBI-UniProt-GOA_17.02.2020_00h00	2.87919e-05	0.00973165	6.99146e-24	1.95761e-22	[5, 6]	Group28	9.14894	43	[AK4, ARF6, ARFIP2, ATL2, DNM2, EEF1A1, EEF1A1P5, EEF2, EHD1, EHD4, EIF5, FLOT1, GFM2, GNA11, GNAS, GNL3, H1-4, HSP90AB1, MTIF2, NDRG1, OLA1, OPA1, PCK2, RAB10, RAB1B, RAB1C, RAB25, RAB6C, RAB8A, RAB9A, RAC1, RALA, RALB, RAN, RHOG, SEPHS1, SRM, SRPRA, SRPRB, TUBB, TUBB6, TUBB8, TUFM]
GO:0030554	adenyl nucleotide binding	GO_MolecularFunction-EBI-UniProt-GOA_17.02.2020_00h00	3.90213e-19	1.51012e-16	6.99146e-24	1.95761e-22	[5, 6]	Group28	9.17722	174	[ABCB10, ABCB7, ABCC3, ABCF1, ACAT1, ACAT2, ACBD3, ACBD5, ACSL3, ACSL5, ACTA2, ACTB, ACTC1, ACTG1, ACTG2, AFG3L2, AGFG1, AK2, AK4, ALDH18A1, ALDH6A1, ALPP, APRT, ASS1, ATAD1, ATAD3A, ATP1A1, ATP1B1, ATP2B4, ATP5F1A, ATP5F1B, ATP5F1D, ATP6V1A, ATP6V1B2, ATP6V1H, CALM1, CALM3, CAMK2B, CAMK2G, CCDC6, CCT2, CCT3, CCT4, CCT5, CCT6A, CDK11A, CDK11B, CDK5, CHORDC1, CKB, CLPB, CLPX, COASY, COQ8A, CPS1, C…
GO:0005524	ATP binding	GO_MolecularFunction-EBI-UniProt-GOA_17.02.2020_00h00	1.02595e-16	3.96016e-14	6.99146e-24	1.95761e-22	[3, 5, 6, 7, 8]	Group28	8.97436	161	[ABCB10, ABCB7, ABCC3, ABCF1, ACSL3, ACSL5, ACTA2, ACTB, ACTC1, ACTG1, ACTG2, AFG3L2, AGFG1, AK2, AK4, ALDH18A1, ALPP, ASS1, ATAD1, ATAD3A, ATP1A1, ATP1B1, ATP2B4, ATP5F1A, ATP5F1B, ATP5F1D, ATP6V1A, ATP6V1B2, ATP6V1H, CALM1, CALM3, CAMK2B, CAMK2G, CCDC6, CCT2, CCT3, CCT4, CCT5, CCT6A, CDK11A, CDK11B, CDK5, CHORDC1, CKB, CLPB, CLPX, COASY, COQ8A, CPS1, CSNK1A1, CXADR, DARS2, DDX10, DDX18, DDX19A,…
GO:0017111	nucleoside-triphosphatase activity	GO_MolecularFunction-EBI-UniProt-GOA_17.02.2020_00h00	5.43856e-09	2.02858e-06	6.99146e-24	1.95761e-22	[6]	Group28	8.92116	86	[ABCB10, ABCB7, ABCC3, ABCF1, ACIN1, ACTC1, ARF6, ATAD1, ATL2, ATP1B1, ATP5F1A, ATP5F1B, ATP5F1C, ATP5F1D, ATP6V1G1, ATP6V1H, CLPB, CLPP, CLPX, DCTN1, DCTN2, DDX10, DDX18, DDX19A, DDX21, DDX23, DDX27, DDX39B, DDX42, DDX47, DDX5, DDX50, DNM2, EEF1A1, EEF1A1P5, EEF2, EIF4A1, EIF4A2, EIF4E, EIF5, GET3, GFM2, GNA11, GNAS, GNB1, HSP90AA1, HSP90AB1, HSPD1, KALRN, KIF5B, KLC4, LONP1, MARCKSL1, MSH2, MTI…
GO:0032559	adenyl ribonucleotide binding	GO_MolecularFunction-EBI-UniProt-GOA_17.02.2020_00h00	3.02698e-19	1.17447e-16	6.99146e-24	1.95761e-22	[5, 6, 7]	Group28	9.20213	173	[ABCB10, ABCB7, ABCC3, ABCF1, ACAT1, ACAT2, ACBD3, ACBD5, ACSL3, ACSL5, ACTA2, ACTB, ACTC1, ACTG1, ACTG2, AFG3L2, AGFG1, AK2, AK4, ALDH18A1, ALDH6A1, ALPP, APRT, ASS1, ATAD1, ATAD3A, ATP1A1, ATP1B1, ATP2B4, ATP5F1A, ATP5F1B, ATP5F1D, ATP6V1A, ATP6V1B2, ATP6V1H, CALM1, CALM3, CAMK2B, CAMK2G, CCDC6, CCT2, CCT3, CCT4, CCT5, CCT6A, CDK11A, CDK11B, CDK5, CHORDC1, CKB, CLPB, CLPX, COASY, COQ8A, CPS1, C…
GO:0032561	guanyl ribonucleotide binding	GO_MolecularFunction-EBI-UniProt-GOA_17.02.2020_00h00	2.87919e-05	0.00973165	6.99146e-24	1.95761e-22	[5, 6, 7]	Group28	9.14894	43	[AK4, ARF6, ARFIP2, ATL2, DNM2, EEF1A1, EEF1A1P5, EEF2, EHD1, EHD4, EIF5, FLOT1, GFM2, GNA11, GNAS, GNL3, H1-4, HSP90AB1, MTIF2, NDRG1, OLA1, OPA1, PCK2, RAB10, RAB1B, RAB1C, RAB25, RAB6C, RAB8A, RAB9A, RAC1, RALA, RALB, RAN, RHOG, SEPHS1, SRM, SRPRA, SRPRB, TUBB, TUBB6, TUBB8, TUFM]
GO:0005525	GTP binding	GO_MolecularFunction-EBI-UniProt-GOA_17.02.2020_00h00	1.70685e-05	0.00593982	6.99146e-24	1.95761e-22	[5, 6, 7, 8]	Group28	9.41704	42	[AK4, ARF6, ARFIP2, ATL2, DNM2, EEF1A1, EEF1A1P5, EEF2, EHD1, EHD4, EIF5, GFM2, GNA11, GNAS, GNL3, H1-4, HSP90AB1, MTIF2, NDRG1, OLA1, OPA1, PCK2, RAB10, RAB1B, RAB1C, RAB25, RAB6C, RAB8A, RAB9A, RAC1, RALA, RALB, RAN, RHOG, SEPHS1, SRM, SRPRA, SRPRB, TUBB, TUBB6, TUBB8, TUFM]
GO:0016887	ATPase activity	GO_MolecularFunction-EBI-UniProt-GOA_17.02.2020_00h00	2.92396e-06	0.00104093	6.99146e-24	1.95761e-22	[7]	Group28	9.34579	50	[ABCB10, ABCB7, ABCC3, ABCF1, ACIN1, ACTC1, ATAD1, ATP1B1, ATP5F1A, ATP5F1B, ATP5F1C, ATP5F1D, ATP6V1G1, ATP6V1H, CLPB, CLPP, CLPX, DDX10, DDX18, DDX19A, DDX21, DDX23, DDX27, DDX39B, DDX42, DDX47, DDX5, DDX50, EIF4A1, EIF4A2, EIF4E, GET3, HSP90AA1, HSP90AB1, HSPD1, KALRN, KIF5B, LONP1, MARCKSL1, MSH2, MTREX, MYO18A, MYO1C, OLA1, PSMC6, RFC4, RUVBL1, RUVBL2, SUPV3L1, YME1L1]
