# Supplementary material for: Ellagic Acid Triggers the Necrosis of Differentiated Human Enterocytes Exposed to 3-Nitro-Tyrosine: An MS-Based Proteomic Study
Source: Antioxidants (Basel). 2022 Dec 17;11(12):2485. doi: 10.3390/antiox11122485 (PMC9774974; doi:10.3390/antiox11122485)
Supplement: Supplementary file 1 [file antioxidants-11-02485-s001.zip › Table S9.xls]

## Sheet: ClueGO Results
ID	Term	Ontology Source	Term PValue	Term PValue Corrected with Bonferroni step down	Group PValue	Group PValue Corrected with Bonferroni step down	GOLevels	GOGroups	% Associated Genes	Nr. Genes	Associated Genes Found
GO:0046686	response to cadmium ion	GO_BiologicalProcess-EBI-UniProt-GOA_17.02.2020_00h00	7.32275e-06	0.00526506	7.32275e-06	6.59048e-05	[5]	Group00	11.7021	11	[AKR1C1, AKR1C3, ALAD, CAT, CYB5A, GCLC, GSS, HAAO, HMOX1, PCNA, SORD]
GO:0061024	membrane organization	GO_BiologicalProcess-EBI-UniProt-GOA_17.02.2020_00h00	9.9417e-06	0.0070089	9.9417e-06	6.95919e-05	[3]	Group01	4.41883	46	[ABCB1, ACAA2, ACTR3, ANXA6, AP2A2, APEX1, APOE, ARPC4, ARPC4-TTLL3, ARPC5, ARSA, ATP5ME, BANF1, CALR, CLTC, CNP, COTL1, CTSC, DHCR24, DYNLT1, EEA1, GCLC, GRB2, HARS1, IQGAP1, M6PR, MYH10, MYH9, MYOF, NMT1, NRCAM, PAFAH1B1, PPT1, RPS27A, S100A10, SERPINA1, SPTBN1, TPP1, UBA52, UBB, UBC, WDR1, YWHAB, YWHAE, YWHAQ, YWHAZ]
GO:0061077	chaperone-mediated protein folding	GO_BiologicalProcess-EBI-UniProt-GOA_17.02.2020_00h00	1.81723e-05	0.0124117	1.81723e-05	0.000109034	[3]	Group02	11.7647	10	[CSNK2A1, CSNK2A2, DNAJB12, FKBP1A, FKBP4, PDIA4, PTGES3, ST13, ST13P4, ST13P5]
GO:0071475	cellular hyperosmotic salinity response	GO_BiologicalProcess-EBI-UniProt-GOA_17.02.2020_00h00	4.24842e-05	0.0280396	4.24842e-05	0.000127453	[6, 7]	Group03	75	3	[AKR1A1, XRCC5, XRCC6]
GO:1901135	carbohydrate derivative metabolic process	GO_BiologicalProcess-EBI-UniProt-GOA_17.02.2020_00h00	6.54881e-06	0.00472824	6.54881e-06	6.54881e-05	[3]	Group04	4.2728	52	[ACOT1, ACOT2, ACSL1, ACSS1, ADK, AKR1A1, AKR1C1, AKR1C3, AKR7A2, ARSA, ASAH1, ATIC, ATP5ME, CAD, CAT, CTSA, DAD1, DTD1, ERH, ERP44, FASN, FBP1, FUCA1, G6PD, GALNS, GALNT3, GALNT6, GLB1, GNS, HEXA, HEXB, NAGA, NEU1, NME1-NME2, NME2, NUDT5, PFAS, PGD, PGM2, POFUT1, PPT1, RBKS, SHMT1, SORD, STT3B, SUMF2, TALDO1, TKFC, TSTA3, UGGT1, UGP2, UPB1]
GO:0001913	T cell mediated cytotoxicity	GO_BiologicalProcess-EBI-UniProt-GOA_17.02.2020_00h00	3.62966e-06	0.00265328	3.62966e-06	4.35559e-05	[3, 6]	Group05	41.6667	5	[CTSB, CTSC, CTSH, HLA-A, TSTA3]
GO:0042558	pteridine-containing compound metabolic process	GO_BiologicalProcess-EBI-UniProt-GOA_17.02.2020_00h00	6.3203e-05	0.0405763	6.3203e-05	6.3203e-05	[4]	Group06	15.2174	7	[ATIC, GGH, PCBD1, PRMT1, QDPR, SHMT1, SHMT2]
GO:0043171	peptide catabolic process	GO_BiologicalProcess-EBI-UniProt-GOA_17.02.2020_00h00	6.3203e-05	0.0405763	6.3203e-05	6.3203e-05	[4, 5, 6]	Group07	15.2174	7	[CPQ, CTSB, CTSH, IDE, LTA4H, NPEPPS, TPP1]
GO:0006452	translational frameshifting	GO_BiologicalProcess-EBI-UniProt-GOA_17.02.2020_00h00	1.07992e-05	0.00759185	4.24842e-05	0.000127453	[6, 7, 8, 9]	Group08	100	3	[EIF5A, EIF5A2, EIF5AL1]
GO:0045905	positive regulation of translational termination	GO_BiologicalProcess-EBI-UniProt-GOA_17.02.2020_00h00	4.24842e-05	0.0280396	4.24842e-05	0.000127453	[7, 8, 9]	Group08	75	3	[EIF5A, EIF5A2, EIF5AL1]
GO:0046907	intracellular transport	GO_BiologicalProcess-EBI-UniProt-GOA_17.02.2020_00h00	2.48648e-07	0.000191707	2.48648e-07	3.23242e-06	[3, 4]	Group09	4.06064	75	[ACOT2, ACTR1A, ANP32A, ANXA8, ANXA8L1, AP1B1, AP2A2, APEX1, APOE, ARCN1, ARSA, ATP5ME, BANF1, CALR, CAT, CLTC, COPA, COPE, CPSF1, CPSF3, CTSA, CTSC, DYNC1H1, DYNLL1, DYNLL2, EEA1, EIF5A, EIF5AL1, ELAVL1, ERP29, FABP3, HARS1, HNRNPA1, IDE, IGFBP7, IQGAP1, KTN1, LRPPRC, M6PR, MAGOHB, METAP1, MYH10, NPC2, NUP210, NUTF2, PAFAH1B1, PEBP1, PITRM1, RAB5C, RPL10A, RPS27A, RPSA, S100A13, SCRN1, SERPINA1,…
GO:0006886	intracellular protein transport	GO_BiologicalProcess-EBI-UniProt-GOA_17.02.2020_00h00	3.50525e-06	0.00256584	2.48648e-07	3.23242e-06	[4, 5, 6, 7, 8]	Group09	4.32973	52	[ACOT2, ACTR1A, AP1B1, AP2A2, APEX1, ARCN1, ARSA, CALR, CAT, CLTC, COPA, CPSF1, CPSF3, CTSA, DYNLL1, DYNLL2, EIF5A, EIF5AL1, ELAVL1, ERP29, HARS1, IDE, IGFBP7, IQGAP1, KTN1, M6PR, MAGOHB, METAP1, NUP210, NUTF2, PEBP1, PITRM1, RAB5C, RPL10A, RPS27A, RPSA, SRSF2, THOC2, TOMM34, TPP1, UBA52, UBB, UBC, UPF1, VCP, VPS26A, VPS29, VPS35, YWHAB, YWHAE, YWHAQ, YWHAZ]
GO:0051653	spindle localization	GO_BiologicalProcess-EBI-UniProt-GOA_17.02.2020_00h00	1.82732e-05	0.0124623	1.82732e-05	9.13659e-05	[3, 4]	Group10	13.2353	9	[ACTR1A, ACTR3, DYNC1H1, DYNLT1, MAP4, MYH9, NUMA1, PAFAH1B1, YWHAE]
GO:0051293	establishment of spindle localization	GO_BiologicalProcess-EBI-UniProt-GOA_17.02.2020_00h00	5.06348e-05	0.0330139	1.82732e-05	9.13659e-05	[4, 5, 6]	Group10	13.3333	8	[ACTR1A, DYNC1H1, DYNLT1, MAP4, MYH9, NUMA1, PAFAH1B1, YWHAE]
GO:0030162	regulation of proteolysis	GO_BiologicalProcess-EBI-UniProt-GOA_17.02.2020_00h00	3.20538e-05	0.0213478	3.20538e-05	0.000128215	[6]	Group11	4.371	41	[ALAD, ANXA8, ANXA8L1, APOE, CPOX, CSNK2A1, CSNK2A2, CSTB, CTSB, CTSC, CTSD, CTSH, DHCR24, DNAJA1, DNPEP, DYNLL1, EXOSC7, FASN, FN1, GCLC, GLG1, HDAC1, IDE, KARS1, LIG3, METAP1, MYH9, PEBP1, PRDX5, PSMD10, RACK1, SERPINA1, SERPINB1, SORD, SPINT1, TPP1, TXNRD2, UBB, VCP, WDR1, YWHAE]
GO:0052547	regulation of peptidase activity	GO_BiologicalProcess-EBI-UniProt-GOA_17.02.2020_00h00	5.01445e-05	0.0327444	3.20538e-05	0.000128215	[5, 7]	Group11	4.97512	30	[ANXA8, ANXA8L1, CPOX, CSNK2A1, CSNK2A2, CSTB, CTSB, CTSC, CTSD, CTSH, DHCR24, DNAJA1, DNPEP, DYNLL1, EXOSC7, FASN, FN1, HDAC1, KARS1, PEBP1, PRDX5, RACK1, SERPINA1, SERPINB1, SORD, SPINT1, TPP1, TXNRD2, VCP, YWHAE]
GO:0019439	aromatic compound catabolic process	GO_BiologicalProcess-EBI-UniProt-GOA_17.02.2020_00h00	2.71446e-05	0.018214	7.47788e-06	5.9823e-05	[4]	Group12	5.15098	29	[BLVRB, CAD, CNP, CPOX, EPHX1, EXOSC7, FAH, HAAO, HGD, HMOX1, MAGOHB, NUDT5, PABPC1, PCBD1, PRDX5, QDPR, RNASET2, RNH1, RPL10A, RPS27A, RPSA, SORD, UBA52, UGGT1, UPB1, UPF1, VCP, WDR61, XRN2]
GO:1901361	organic cyclic compound catabolic process	GO_BiologicalProcess-EBI-UniProt-GOA_17.02.2020_00h00	1.65452e-05	0.0113831	7.47788e-06	5.9823e-05	[4]	Group12	5.09868	31	[ALDH4A1, ALDH9A1, APOE, BLVRB, CAD, CNP, CPOX, EXOSC7, FAH, HAAO, HGD, HMOX1, MAGOHB, NUDT5, PABPC1, PCBD1, PRDX5, QDPR, RNASET2, RNH1, RPL10A, RPS27A, RPSA, SORD, UBA52, UGGT1, UPB1, UPF1, VCP, WDR61, XRN2]
GO:0006687	glycosphingolipid metabolic process	GO_BiologicalProcess-EBI-UniProt-GOA_17.02.2020_00h00	7.51011e-05	0.0479145	5.93122e-06	6.52434e-05	[5, 6, 7]	Group13	11.1111	9	[ARSA, ASAH1, CTSA, GLB1, HEXA, HEXB, NAGA, NEU1, SUMF2]
GO:0042340	keratan sulfate catabolic process	GO_BiologicalProcess-EBI-UniProt-GOA_17.02.2020_00h00	8.84453e-06	0.00627961	5.93122e-06	6.52434e-05	[5, 6, 7, 8]	Group13	35.7143	5	[GALNS, GLB1, GNS, HEXA, HEXB]
GO:0044403	symbiotic process	GO_BiologicalProcess-EBI-UniProt-GOA_17.02.2020_00h00	3.29748e-11	2.68415e-08	3.29748e-11	6.59495e-10	[3]	Group14	5.49159	62	[AP1B1, AP2A2, APOE, BANF1, CD81, COPS6, CPOX, CTSB, CTSH, DDB1, DDX1, DNAJB12, DYNLL1, DYNLT1, EEA1, EIF3B, EIF4H, ELOC, FN1, GRB2, HDAC1, HLA-A, HNRNPA1, IDE, IQGAP1, ISG15, KARS1, KTN1, MRE11, NUP210, PCNA, POLR2A, PSMB1, PSMB2, PSMB3, PSMB4, PSMB5, PTPN11, RACK1, RPL10A, RPS27A, RPSA, SET, SSRP1, STAU1, SUPT16H, TALDO1, THOC2, TLN1, TXN, UBA52, UBB, UBC, UPF1, VCP, VPS29, VPS35, WDR1, XRCC5, …
GO:0016032	viral process	GO_BiologicalProcess-EBI-UniProt-GOA_17.02.2020_00h00	8.04024e-12	6.56083e-09	3.29748e-11	6.59495e-10	[4]	Group14	5.83581	59	[AP1B1, AP2A2, APOE, BANF1, CD81, COPS6, CPOX, CTSB, CTSH, DDB1, DDX1, DNAJB12, DYNLL1, DYNLT1, EEA1, EIF3B, EIF4H, ELOC, GRB2, HLA-A, HNRNPA1, IDE, IQGAP1, ISG15, KARS1, KTN1, MRE11, NUP210, PCNA, POLR2A, PSMB1, PSMB2, PSMB3, PSMB4, PSMB5, PTPN11, RACK1, RPL10A, RPS27A, RPSA, SET, SSRP1, STAU1, SUPT16H, TALDO1, TLN1, TXN, UBA52, UBB, UBC, UPF1, VCP, VPS29, VPS35, WDR1, XRCC5, XRCC6, YWHAB, YWHAE]
GO:0016627	oxidoreductase activity, acting on the CH-CH group of donors	GO_BiologicalProcess-EBI-UniProt-GOA_17.02.2020_00h00	3.21473e-09	2.57179e-06	1.32458e-09	2.11933e-08	[4]	Group15	18.8406	13	[ACADM, ACADVL, AKR1C1, AKR1C3, BDH2, BLVRB, CPOX, DECR1, DHCR24, FASN, IVD, SDHB, SORD]
GO:0016628	oxidoreductase activity, acting on the CH-CH group of donors, NAD or NADP as acceptor	GO_BiologicalProcess-EBI-UniProt-GOA_17.02.2020_00h00	2.54918e-06	0.00188639	1.32458e-09	2.11933e-08	[5]	Group15	24.1379	7	[AKR1C1, AKR1C3, BDH2, BLVRB, DECR1, DHCR24, FASN]
GO:0072329	monocarboxylic acid catabolic process	GO_BiologicalProcess-EBI-UniProt-GOA_17.02.2020_00h00	2.42114e-06	0.00179649	1.32458e-09	2.11933e-08	[6, 7]	Group15	9.49367	15	[ABAT, ACAA2, ACADM, ACADVL, ADH5, AKR1A1, ALDH3A2, BDH2, DECR1, FAH, HSD17B10, IVD, PCCB, PGD, SORD]
GO:0051236	establishment of RNA localization	GO_BiologicalProcess-EBI-UniProt-GOA_17.02.2020_00h00	5.93769e-05	0.0382981	5.93769e-05	0.000118754	[3, 4]	Group16	6.40569	18	[CPSF1, CPSF3, EIF5A, EIF5A2, EIF5AL1, HARS1, HNRNPA1, HNRNPA1L2, IGFBP7, KTN1, LRPPRC, MAGOHB, NUP210, NUTF2, RPSA, SRSF2, THOC2, UPF1]
GO:0050658	RNA transport	GO_BiologicalProcess-EBI-UniProt-GOA_17.02.2020_00h00	4.48756e-05	0.0294833	5.93769e-05	0.000118754	[4, 5, 7]	Group16	6.54545	18	[CPSF1, CPSF3, EIF5A, EIF5A2, EIF5AL1, HARS1, HNRNPA1, HNRNPA1L2, IGFBP7, KTN1, LRPPRC, MAGOHB, NUP210, NUTF2, RPSA, SRSF2, THOC2, UPF1]
GO:0050657	nucleic acid transport	GO_BiologicalProcess-EBI-UniProt-GOA_17.02.2020_00h00	4.48756e-05	0.0294833	5.93769e-05	0.000118754	[6]	Group16	6.54545	18	[CPSF1, CPSF3, EIF5A, EIF5A2, EIF5AL1, HARS1, HNRNPA1, HNRNPA1L2, IGFBP7, KTN1, LRPPRC, MAGOHB, NUP210, NUTF2, RPSA, SRSF2, THOC2, UPF1]
GO:0051028	mRNA transport	GO_BiologicalProcess-EBI-UniProt-GOA_17.02.2020_00h00	9.82368e-06	0.00693551	5.93769e-05	0.000118754	[5, 6, 8]	Group16	7.65766	17	[CPSF1, CPSF3, EIF5A, EIF5A2, EIF5AL1, HARS1, HNRNPA1, HNRNPA1L2, KTN1, LRPPRC, MAGOHB, NUP210, NUTF2, RPSA, SRSF2, THOC2, UPF1]
GO:0006091	generation of precursor metabolites and energy	GO_BiologicalProcess-EBI-UniProt-GOA_17.02.2020_00h00	1.12862e-14	9.37882e-12	1.8942e-14	3.97783e-13	[3]	Group17	8.62745	44	[ACADM, ACADVL, ACO1, ACO2, ACSS1, ADH4, ADH5, AIFM2, AKR1A1, AKR7A2, ALDH2, ALDH4A1, ALDH9A1, ARSA, ATP5ME, BDH2, CAT, COX7A2, CYB5A, G6PD, GAA, GLDC, GLRX5, GSR, HAAO, IDH2, MAT2B, MDH1, ME1, ME2, NDUFA4, PGD, PGM2, PTGES3, PYGB, QDPR, RBKS, SDHB, SORD, TALDO1, TSTA3, TXNRD2, UGP2, UQCRB]
GO:0015980	energy derivation by oxidation of organic compounds	GO_BiologicalProcess-EBI-UniProt-GOA_17.02.2020_00h00	3.36086e-05	0.0223497	1.8942e-14	3.97783e-13	[3, 4]	Group17	6.69145	18	[ACADM, ACADVL, ACO1, ACO2, AIFM2, CAT, GAA, IDH2, MDH1, ME2, NDUFA4, PGM2, PTGES3, PYGB, SDHB, SORD, UGP2, UQCRB]
GO:0044262	cellular carbohydrate metabolic process	GO_BiologicalProcess-EBI-UniProt-GOA_17.02.2020_00h00	3.56091e-05	0.0236089	1.8942e-14	3.97783e-13	[3, 4]	Group17	7.23982	16	[ACADM, AKR1A1, FBP1, GAA, GLB1, IDH2, MYOF, PGD, PGM2, PTGES3, PYGB, RBKS, SORD, TKFC, UGP2, VPS29]
GO:0006099	tricarboxylic acid cycle	GO_BiologicalProcess-EBI-UniProt-GOA_17.02.2020_00h00	6.3203e-05	0.0405763	1.8942e-14	3.97783e-13	[3, 6, 7]	Group17	15.2174	7	[ACO1, ACO2, IDH2, MDH1, ME2, SDHB, SORD]
GO:0009060	aerobic respiration	GO_BiologicalProcess-EBI-UniProt-GOA_17.02.2020_00h00	5.27866e-05	0.0343113	1.8942e-14	3.97783e-13	[5, 6]	Group17	10.4167	10	[ACO1, ACO2, CAT, IDH2, MDH1, ME2, NDUFA4, SDHB, SORD, UQCRB]
GO:0006508	proteolysis	GO_BiologicalProcess-EBI-UniProt-GOA_17.02.2020_00h00	4.20326e-08	3.30376e-05	4.20326e-08	6.30489e-07	[4, 5]	Group18	4.3949	69	[ACTL6A, APEH, CAPN1, CNDP2, COPS6, CPD, CPOX, CPQ, CPVL, CTSA, CTSB, CTSC, CTSD, CTSH, DDB1, DHCR24, DNAJB12, DNPEP, DPP3, DPP7, ELOC, ERMP1, EXOSC7, FGG, GGH, HARS1, IDE, IGFBP7, ISG15, LAP3, LTA4H, METAP1, MYH9, NAALAD2, NLN, NPEPPS, PCYOX1, PITRM1, PRCP, PRPF19, PSMA1, PSMA6, PSMB1, PSMB2, PSMB3, PSMB4, PSMB5, PSMD10, PSMD12, PSMD6, RNPEP, RPS27A, SCRN1, SCRN2, SHMT1, SHMT2, STT3B, SUB1, TBL1…
GO:0008233	peptidase activity	GO_BiologicalProcess-EBI-UniProt-GOA_17.02.2020_00h00	1.66646e-07	0.000129318	4.20326e-08	6.30489e-07	[5, 6]	Group18	5.30973	42	[APEH, CAPN1, CNDP2, CPD, CPOX, CPQ, CPVL, CTSA, CTSB, CTSC, CTSD, CTSH, DNPEP, DPP3, DPP7, ERMP1, GGH, IDE, IGFBP7, LAP3, LTA4H, METAP1, NAALAD2, NLN, NPEPPS, PITRM1, PRCP, PSMA1, PSMA6, PSMB1, PSMB2, PSMB3, PSMB4, PSMB5, RNPEP, SCRN1, SCRN2, SHMT1, SUB1, TPP1, TPP2, UCHL1]
GO:0070011	peptidase activity, acting on L-amino acid peptides	GO_BiologicalProcess-EBI-UniProt-GOA_17.02.2020_00h00	8.43329e-08	6.5864e-05	4.20326e-08	6.30489e-07	[6, 7]	Group18	5.49738	42	[APEH, CAPN1, CNDP2, CPD, CPOX, CPQ, CPVL, CTSA, CTSB, CTSC, CTSD, CTSH, DNPEP, DPP3, DPP7, ERMP1, GGH, IDE, IGFBP7, LAP3, LTA4H, METAP1, NAALAD2, NLN, NPEPPS, PITRM1, PRCP, PSMA1, PSMA6, PSMB1, PSMB2, PSMB3, PSMB4, PSMB5, RNPEP, SCRN1, SCRN2, SHMT1, SUB1, TPP1, TPP2, UCHL1]
GO:0008237	metallopeptidase activity	GO_BiologicalProcess-EBI-UniProt-GOA_17.02.2020_00h00	4.19181e-05	0.0277079	4.20326e-08	6.30489e-07	[7, 8]	Group18	7.14286	16	[CNDP2, CPD, CPOX, CPQ, DNPEP, DPP3, ERMP1, IDE, LAP3, LTA4H, METAP1, NAALAD2, NLN, NPEPPS, PITRM1, RNPEP]
GO:0008238	exopeptidase activity	GO_BiologicalProcess-EBI-UniProt-GOA_17.02.2020_00h00	2.36206e-14	1.95815e-11	4.20326e-08	6.30489e-07	[7, 8]	Group18	15.3374	25	[APEH, CNDP2, CPD, CPOX, CPQ, CPVL, CTSA, CTSB, CTSH, DNPEP, DPP3, DPP7, GGH, LAP3, LTA4H, METAP1, NAALAD2, NPEPPS, PRCP, RNPEP, SCRN1, SCRN2, TPP1, TPP2, UCHL1]
GO:0004177	aminopeptidase activity	GO_BiologicalProcess-EBI-UniProt-GOA_17.02.2020_00h00	1.20793e-09	9.71175e-07	4.20326e-08	6.30489e-07	[8, 9]	Group18	20.3125	13	[CTSB, CTSH, DNPEP, DPP3, DPP7, LAP3, LTA4H, METAP1, NAALAD2, NPEPPS, PRCP, RNPEP, TPP2]
GO:0005975	carbohydrate metabolic process	GO_BiologicalProcess-EBI-UniProt-GOA_17.02.2020_00h00	1.55357e-10	1.25683e-07	3.73654e-11	7.09943e-10	[3]	Group19	6.96864	40	[ACADM, AKR1A1, AKR7A2, ALDH2, APOD, CYB5A, FBP1, FUCA1, FUOM, G6PD, GAA, GALE, GALNT3, GCLC, GLB1, HEXA, HEXB, IDH2, MDH1, ME1, MLEC, MYOF, NAGA, NEU1, NUDT5, PGD, PGM2, POFUT1, PTGES3, PYGB, RBKS, RBP4, SDHB, SORD, TALDO1, TKFC, UGGT1, UGP2, UGT2A1, VPS29]
GO:0005996	monosaccharide metabolic process	GO_BiologicalProcess-EBI-UniProt-GOA_17.02.2020_00h00	4.3871e-09	3.49652e-06	3.73654e-11	7.09943e-10	[3, 4]	Group19	9.1954	24	[AKR1A1, APOD, CYB5A, FBP1, FUCA1, FUOM, G6PD, GAA, GALE, GCLC, GLB1, MDH1, NUDT5, PGD, PGM2, POFUT1, RBKS, RBP4, SDHB, SORD, TALDO1, TKFC, UGGT1, UGT2A1]
GO:0015980	energy derivation by oxidation of organic compounds	GO_BiologicalProcess-EBI-UniProt-GOA_17.02.2020_00h00	3.36086e-05	0.0223497	3.73654e-11	7.09943e-10	[3, 4]	Group19	6.69145	18	[ACADM, ACADVL, ACO1, ACO2, AIFM2, CAT, GAA, IDH2, MDH1, ME2, NDUFA4, PGM2, PTGES3, PYGB, SDHB, SORD, UGP2, UQCRB]
GO:0044262	cellular carbohydrate metabolic process	GO_BiologicalProcess-EBI-UniProt-GOA_17.02.2020_00h00	3.56091e-05	0.0236089	3.73654e-11	7.09943e-10	[3, 4]	Group19	7.23982	16	[ACADM, AKR1A1, FBP1, GAA, GLB1, IDH2, MYOF, PGD, PGM2, PTGES3, PYGB, RBKS, SORD, TKFC, UGP2, VPS29]
GO:0016052	carbohydrate catabolic process	GO_BiologicalProcess-EBI-UniProt-GOA_17.02.2020_00h00	5.91244e-06	0.00428652	3.73654e-11	7.09943e-10	[4]	Group19	9.39597	14	[AKR1A1, GAA, GALE, GLB1, HEXB, NAGA, NEU1, NUDT5, PGD, PGM2, PYGB, RBKS, SORD, TKFC]
GO:0019318	hexose metabolic process	GO_BiologicalProcess-EBI-UniProt-GOA_17.02.2020_00h00	1.90456e-05	0.012951	3.73654e-11	7.09943e-10	[4, 5]	Group19	7.61905	16	[AKR1A1, APOD, FBP1, FUCA1, FUOM, G6PD, GAA, GALE, GLB1, MDH1, PGM2, POFUT1, RBP4, SDHB, SORD, TKFC]
GO:0017144	drug metabolic process	GO_BiologicalProcess-EBI-UniProt-GOA_17.02.2020_00h00	2.32663e-11	1.89621e-08	2.72173e-28	8.70955e-27	[3]	Group20	6.79758	45	[ACO1, ACO2, ACSL1, ACSS1, ADH4, ADH5, ADK, AFP, AKR1A1, AKR1C1, AKR1C3, AKR7A2, ALDH2, ALDH3A2, ALDH9A1, ATP5ME, BDH2, CAD, CAT, CTSB, CTSH, FAH, GLDC, HAAO, HGD, IDE, MAT2A, MAT2B, NPEPPS, OAT, PAFAH1B1, PCBD1, PCCB, PDXK, PNPO, PRDX5, PRMT1, QDPR, SDHB, SHMT1, SHMT2, SLC19A3, SORD, UGGT1, YWHAE]
GO:0044282	small molecule catabolic process	GO_BiologicalProcess-EBI-UniProt-GOA_17.02.2020_00h00	1.25127e-12	1.02979e-09	2.72173e-28	8.70955e-27	[3]	Group20	7.67857	43	[ABAT, ACAA2, ACADM, ACADVL, ADH4, ADH5, AKR1A1, AKR1C1, AKR1C3, ALDH2, ALDH3A2, ALDH4A1, ALDH9A1, APOE, BDH2, DECR1, FAH, GALE, GLB1, GLDC, GLUL, HAAO, HEXA, HEXB, HGD, HSD17B10, IVD, NUDT5, OAT, PCBD1, PCCB, PCYOX1, PGD, PGM2, PRDX5, QDPR, RBKS, SDHB, SHMT1, SHMT2, SORD, TKFC, UPB1]
GO:0051186	cofactor metabolic process	GO_BiologicalProcess-EBI-UniProt-GOA_17.02.2020_00h00	1.05064e-13	8.6783e-11	2.72173e-28	8.70955e-27	[3]	Group20	7.95053	45	[ACOT1, ACOT2, ACSL1, ACSS1, ADH4, AIFM2, AKR1A1, AKR1C1, AKR1C3, AKR7A2, ALAD, ATIC, BDH2, BLVRB, CAT, CNDP2, CPOX, CYB5A, FASN, G6PD, GCLC, GGCT, GGH, GSR, GSS, GSTM3, HAAO, HMOX1, IDH2, MAT2A, MAT2B, MGST1, NPEPPS, PCBD1, PCCB, PDXK, PNPO, PPT1, PRDX5, PRMT1, QDPR, SHMT1, SHMT2, UGGT1, VCP]
GO:1901615	organic hydroxy compound metabolic process	GO_BiologicalProcess-EBI-UniProt-GOA_17.02.2020_00h00	1.46805e-10	1.18912e-07	2.72173e-28	8.70955e-27	[3]	Group20	6.74157	42	[ACAA2, ACO2, ACSS1, ADH4, ADH5, AKR1A1, AKR1C1, AKR1C3, AKR7A2, ALDH2, ALDH3A2, ALDH9A1, APOA1, APOE, ASAH1, CAT, CPQ, CTSB, CTSH, DDT, DDTL, DHCR24, FAH, G6PD, GLB1, IDH2, MTPN, MYOF, NPC2, NPEPPS, PCBD1, PDXK, PEBP1, PNPO, PRDX5, QDPR, RBP4, SCRN1, SORD, TKFC, TPP1, VPS29]
GO:0016999	antibiotic metabolic process	GO_BiologicalProcess-EBI-UniProt-GOA_17.02.2020_00h00	5.91244e-06	0.00428652	2.72173e-28	8.70955e-27	[4]	Group20	9.39597	14	[ACO1, ACO2, ACSS1, ADH4, ADH5, AKR1A1, AKR1C1, AKR1C3, AKR7A2, ALDH2, ALDH9A1, CAT, PRDX5, UGGT1]
GO:0019752	carboxylic acid metabolic process	GO_BiologicalProcess-EBI-UniProt-GOA_17.02.2020_00h00	6.29989e-19	5.33601e-16	2.72173e-28	8.70955e-27	[5]	Group20	6.84068	76	[AARS1, ABAT, ACAA2, ACADM, ACADVL, ACO1, ACO2, ACOT1, ACOT2, ACSL1, ACSS1, ADH4, ADH5, AIFM2, AKR1A1, AKR1C1, AKR1C3, ALDH3A2, ALDH4A1, ALDH9A1, ARSA, ATIC, BDH2, CAD, CARS1, CAT, CYB5A, DECR1, DTD1, EPRS1, FABP3, FAH, FASN, GCLC, GGH, GLDC, GLUL, GRHPR, GSS, HAAO, HARS1, HEXA, HEXB, HGD, HSD17B10, IDH2, IVD, KARS1, LARS1, LTA4H, MDH1, ME1, ME2, NAALAD2, NIT2, NPEPPS, OAT, PCBD1, PCCB, PCYOX1, P…
GO:1901605	alpha-amino acid metabolic process	GO_BiologicalProcess-EBI-UniProt-GOA_17.02.2020_00h00	8.30341e-07	0.000631059	2.72173e-28	8.70955e-27	[4, 5, 7]	Group20	7.69231	21	[ALDH4A1, ALDH9A1, CAD, CAT, FAH, GCLC, GLDC, GLUL, HAAO, HGD, IVD, NIT2, NPEPPS, OAT, PCBD1, PFAS, QDPR, SDHB, SHMT1, SHMT2, SORD]
GO:0006766	vitamin metabolic process	GO_BiologicalProcess-EBI-UniProt-GOA_17.02.2020_00h00	5.65561e-05	0.0366483	3.55846e-18	9.25199e-17	[3]	Group21	7.69231	14	[AKR1A1, CYB5A, GCLC, HAAO, NPEPPS, PCCB, PDXK, PNPO, PRDX5, PRMT1, SHMT1, SHMT2, SLC19A3, TPP1]
GO:0006790	sulfur compound metabolic process	GO_BiologicalProcess-EBI-UniProt-GOA_17.02.2020_00h00	3.04745e-06	0.00223683	3.55846e-18	9.25199e-17	[3]	Group21	6	27	[ACOT1, ACOT2, ACSL1, ACSS1, AKR1A1, CAT, CNDP2, DTD1, FASN, G6PD, GALNS, GCLC, GGCT, GLB1, GNS, GSR, GSS, GSTM3, HEXA, HEXB, MAT2A, MAT2B, MGST1, PCCB, PCYOX1, PPT1, SLC19A3]
GO:0017144	drug metabolic process	GO_BiologicalProcess-EBI-UniProt-GOA_17.02.2020_00h00	2.32663e-11	1.89621e-08	3.55846e-18	9.25199e-17	[3]	Group21	6.79758	45	[ACO1, ACO2, ACSL1, ACSS1, ADH4, ADH5, ADK, AFP, AKR1A1, AKR1C1, AKR1C3, AKR7A2, ALDH2, ALDH3A2, ALDH9A1, ATP5ME, BDH2, CAD, CAT, CTSB, CTSH, FAH, GLDC, HAAO, HGD, IDE, MAT2A, MAT2B, NPEPPS, OAT, PAFAH1B1, PCBD1, PCCB, PDXK, PNPO, PRDX5, PRMT1, QDPR, SDHB, SHMT1, SHMT2, SLC19A3, SORD, UGGT1, YWHAE]
GO:0051186	cofactor metabolic process	GO_BiologicalProcess-EBI-UniProt-GOA_17.02.2020_00h00	1.05064e-13	8.6783e-11	3.55846e-18	9.25199e-17	[3]	Group21	7.95053	45	[ACOT1, ACOT2, ACSL1, ACSS1, ADH4, AIFM2, AKR1A1, AKR1C1, AKR1C3, AKR7A2, ALAD, ATIC, BDH2, BLVRB, CAT, CNDP2, CPOX, CYB5A, FASN, G6PD, GCLC, GGCT, GGH, GSR, GSS, GSTM3, HAAO, HMOX1, IDH2, MAT2A, MAT2B, MGST1, NPEPPS, PCBD1, PCCB, PDXK, PNPO, PPT1, PRDX5, PRMT1, QDPR, SHMT1, SHMT2, UGGT1, VCP]
GO:0006732	coenzyme metabolic process	GO_BiologicalProcess-EBI-UniProt-GOA_17.02.2020_00h00	1.5393e-09	1.23605e-06	3.55846e-18	9.25199e-17	[4]	Group21	8.70968	27	[ACOT1, ACOT2, ACSL1, ACSS1, AIFM2, AKR1A1, ATIC, CAT, CYB5A, FASN, GCLC, GGH, HAAO, IDH2, MAT2A, MAT2B, PCBD1, PCCB, PDXK, PNPO, PPT1, PRDX5, PRMT1, QDPR, SHMT1, SHMT2, VCP]
GO:0006767	water-soluble vitamin metabolic process	GO_BiologicalProcess-EBI-UniProt-GOA_17.02.2020_00h00	8.9584e-06	0.00635151	3.55846e-18	9.25199e-17	[4]	Group21	9.70149	13	[AKR1A1, CYB5A, GCLC, HAAO, NPEPPS, PCCB, PDXK, PNPO, PRDX5, PRMT1, SHMT1, SHMT2, SLC19A3]
GO:0051188	cofactor biosynthetic process	GO_BiologicalProcess-EBI-UniProt-GOA_17.02.2020_00h00	1.79523e-07	0.00013913	3.55846e-18	9.25199e-17	[4]	Group21	8.11808	22	[ACSL1, ACSS1, AKR1A1, ALAD, ATIC, BDH2, CNDP2, CPOX, FASN, GCLC, GGCT, GSS, HAAO, IDH2, MAT2A, MAT2B, NPEPPS, PCBD1, PDXK, PNPO, PPT1, QDPR]
GO:0009108	coenzyme biosynthetic process	GO_BiologicalProcess-EBI-UniProt-GOA_17.02.2020_00h00	2.49507e-05	0.0168417	3.55846e-18	9.25199e-17	[5]	Group21	8.28402	14	[ACSL1, ACSS1, AKR1A1, ATIC, FASN, HAAO, IDH2, MAT2A, MAT2B, PCBD1, PDXK, PNPO, PPT1, QDPR]
GO:0044248	cellular catabolic process	GO_BiologicalProcess-EBI-UniProt-GOA_17.02.2020_00h00	1.70535e-21	1.46319e-18	8.9163e-21	2.49656e-19	[3]	Group22	5.43478	120	[ABAT, ACAA2, ACADM, ACADVL, ACSL1, ADH4, ADH5, AKR1A1, AKR1C1, AKR1C3, ALDH2, ALDH3A2, ALDH4A1, ALDH9A1, AP2A2, APEX1, APOC3, ARSA, ASAH1, BDH2, BLVRB, CAD, CAPN1, CAT, CLTC, CNP, CPOX, CPQ, CPVL, CRYZ, CSNK2A1, CSNK2A2, CTSA, CTSB, CTSC, CTSH, DDB1, DECR1, DNAJB12, DNPEP, DYNLL1, DYNLL2, ELOC, EPHX1, EXOSC7, FABP3, FAH, FUCA1, GAA, GALNS, GLB1, GLDC, GLUL, GNS, GSTM3, HAAO, HARS1, HEXA, HEXB, H…
GO:0044282	small molecule catabolic process	GO_BiologicalProcess-EBI-UniProt-GOA_17.02.2020_00h00	1.25127e-12	1.02979e-09	8.9163e-21	2.49656e-19	[3]	Group22	7.67857	43	[ABAT, ACAA2, ACADM, ACADVL, ADH4, ADH5, AKR1A1, AKR1C1, AKR1C3, ALDH2, ALDH3A2, ALDH4A1, ALDH9A1, APOE, BDH2, DECR1, FAH, GALE, GLB1, GLDC, GLUL, HAAO, HEXA, HEXB, HGD, HSD17B10, IVD, NUDT5, OAT, PCBD1, PCCB, PCYOX1, PGD, PGM2, PRDX5, QDPR, RBKS, SDHB, SHMT1, SHMT2, SORD, TKFC, UPB1]
GO:1901575	organic substance catabolic process	GO_BiologicalProcess-EBI-UniProt-GOA_17.02.2020_00h00	7.04041e-19	5.95619e-16	8.9163e-21	2.49656e-19	[3]	Group22	5.21218	113	[ABAT, ACAA2, ACADM, ACADVL, ADH4, ADH5, AKR1A1, AKR1C1, AKR1C3, ALDH2, ALDH3A2, ALDH4A1, ALDH9A1, AP2A2, APOC3, APOE, ASAH1, BDH2, BLVRB, CAD, CAPN1, CLTC, CNP, CPOX, CPQ, CPVL, CTSA, CTSB, CTSC, CTSD, CTSH, DDB1, DECR1, DNAJB12, ELOC, EXOSC7, FABP3, FAH, FUCA1, GAA, GALE, GALNS, GLB1, GLDC, GLUL, GNS, HAAO, HEXA, HEXB, HGD, HMOX1, HSD17B10, IDE, ISG15, IVD, LTA4H, MAGOHB, NAGA, NEU1, NPEPPS, NU…
GO:0009057	macromolecule catabolic process	GO_BiologicalProcess-EBI-UniProt-GOA_17.02.2020_00h00	1.07557e-08	8.51852e-06	8.9163e-21	2.49656e-19	[4]	Group22	4.78026	62	[AP2A2, APOE, CAD, CAPN1, CLTC, CPOX, CPVL, CTSA, CTSB, CTSC, CTSD, CTSH, DDB1, DNAJB12, ELOC, EXOSC7, FUCA1, GAA, GALNS, GLB1, GNS, HEXA, HEXB, IDE, ISG15, MAGOHB, PABPC1, PCYOX1, PGM2, PPT1, PRPF19, PSMA1, PSMA6, PSMB1, PSMB2, PSMB3, PSMB4, PSMB5, PSMD10, PSMD12, PSMD6, PYGB, RNASET2, RNH1, RPL10A, RPS27A, RPSA, STT3B, TALDO1, TBL1XR1, TPP1, UBA52, UBB, UBC, UBXN4, UCHL1, UGGT1, UPF1, VCP, WDR1…
GO:1901565	organonitrogen compound catabolic process	GO_BiologicalProcess-EBI-UniProt-GOA_17.02.2020_00h00	8.40611e-14	6.96026e-11	8.9163e-21	2.49656e-19	[4]	Group22	5.60538	75	[ABAT, ALDH4A1, ALDH9A1, AP2A2, APOE, ASAH1, BLVRB, CLTC, CPOX, CPQ, CPVL, CTSA, CTSB, CTSC, CTSD, CTSH, DDB1, DNAJB12, ELOC, EXOSC7, FAH, FUCA1, GALNS, GLB1, GLDC, GLUL, GNS, HAAO, HEXA, HEXB, HGD, HMOX1, HSD17B10, IDE, ISG15, IVD, LTA4H, NAGA, NEU1, NPEPPS, OAT, PCBD1, PCYOX1, PPT1, PRDX5, PRPF19, PSMA1, PSMA6, PSMB1, PSMB2, PSMB3, PSMB4, PSMB5, PSMD10, PSMD12, PSMD6, QDPR, RPS27A, SDHB, SHMT1,…
GO:0030163	protein catabolic process	GO_BiologicalProcess-EBI-UniProt-GOA_17.02.2020_00h00	1.88172e-06	0.0014	8.9163e-21	2.49656e-19	[4, 5]	Group22	4.91228	42	[AP2A2, APOE, CLTC, CPOX, CPVL, CTSA, CTSB, CTSC, CTSD, CTSH, DDB1, DNAJB12, ELOC, EXOSC7, IDE, ISG15, PCYOX1, PPT1, PRPF19, PSMA1, PSMA6, PSMB1, PSMB2, PSMB3, PSMB4, PSMB5, PSMD10, PSMD12, PSMD6, RPS27A, STT3B, TALDO1, TBL1XR1, TPP1, UBA52, UBB, UBC, UBXN4, UCHL1, UGGT1, VCP, WDR1]
GO:0044265	cellular macromolecule catabolic process	GO_BiologicalProcess-EBI-UniProt-GOA_17.02.2020_00h00	2.1333e-05	0.0144851	8.9163e-21	2.49656e-19	[4, 5]	Group22	4.21147	47	[AP2A2, CAD, CLTC, CPVL, CTSA, CTSB, CTSC, CTSH, DDB1, DNAJB12, ELOC, EXOSC7, IDE, ISG15, MAGOHB, PABPC1, PCYOX1, PPT1, PRPF19, PSMA1, PSMA6, PSMB1, PSMB2, PSMB3, PSMB4, PSMB5, PSMD10, PSMD12, PSMD6, RNASET2, RNH1, RPL10A, RPS27A, RPSA, STT3B, TBL1XR1, UBA52, UBB, UBC, UBXN4, UCHL1, UGGT1, UPF1, VCP, WDR1, WDR61, XRN2]
GO:0044257	cellular protein catabolic process	GO_BiologicalProcess-EBI-UniProt-GOA_17.02.2020_00h00	1.18918e-05	0.0083005	8.9163e-21	2.49656e-19	[5, 6]	Group22	4.84928	37	[AP2A2, CLTC, CPVL, CTSA, CTSB, CTSC, CTSH, DDB1, DNAJB12, ELOC, EXOSC7, IDE, ISG15, PCYOX1, PPT1, PRPF19, PSMA1, PSMA6, PSMB1, PSMB2, PSMB3, PSMB4, PSMB5, PSMD10, PSMD12, PSMD6, RPS27A, STT3B, TBL1XR1, UBA52, UBB, UBC, UBXN4, UCHL1, UGGT1, VCP, WDR1]
GO:0006081	cellular aldehyde metabolic process	GO_BiologicalProcess-EBI-UniProt-GOA_17.02.2020_00h00	5.22699e-12	4.27568e-09	3.99243e-18	9.98108e-17	[3]	Group23	21.6216	16	[ADH4, ADH5, AKR1A1, AKR1C1, AKR1C3, AKR7A2, ALDH3A2, ALDH4A1, ALDH9A1, GRHPR, IDH2, PDXK, PNPO, PRDX5, TALDO1, TKFC]
GO:0017144	drug metabolic process	GO_BiologicalProcess-EBI-UniProt-GOA_17.02.2020_00h00	2.32663e-11	1.89621e-08	3.99243e-18	9.98108e-17	[3]	Group23	6.79758	45	[ACO1, ACO2, ACSL1, ACSS1, ADH4, ADH5, ADK, AFP, AKR1A1, AKR1C1, AKR1C3, AKR7A2, ALDH2, ALDH3A2, ALDH9A1, ATP5ME, BDH2, CAD, CAT, CTSB, CTSH, FAH, GLDC, HAAO, HGD, IDE, MAT2A, MAT2B, NPEPPS, OAT, PAFAH1B1, PCBD1, PCCB, PDXK, PNPO, PRDX5, PRMT1, QDPR, SDHB, SHMT1, SHMT2, SLC19A3, SORD, UGGT1, YWHAE]
GO:0044283	small molecule biosynthetic process	GO_BiologicalProcess-EBI-UniProt-GOA_17.02.2020_00h00	4.49223e-11	3.64769e-08	3.99243e-18	9.98108e-17	[3]	Group23	6.3745	48	[ABAT, ACAA2, ACSS1, ADK, AIFM2, AKR1A1, AKR1C1, AKR1C3, APOA1, ARSA, ASAH1, ATIC, BDH2, CAD, CNP, DHCR24, FASN, FBP1, G6PD, GLB1, GLUL, HAAO, LTA4H, MDH1, NAALAD2, NME1-NME2, NME2, NPEPPS, NUDT5, OAT, PCBD1, PCCB, PDXK, PGD, PNPO, PRDX5, PTGES3, QDPR, RBP4, SCRN1, SDHB, SHMT1, SHMT2, SORD, TALDO1, UGP2, UPB1, VCP]
GO:1901615	organic hydroxy compound metabolic process	GO_BiologicalProcess-EBI-UniProt-GOA_17.02.2020_00h00	1.46805e-10	1.18912e-07	3.99243e-18	9.98108e-17	[3]	Group23	6.74157	42	[ACAA2, ACO2, ACSS1, ADH4, ADH5, AKR1A1, AKR1C1, AKR1C3, AKR7A2, ALDH2, ALDH3A2, ALDH9A1, APOA1, APOE, ASAH1, CAT, CPQ, CTSB, CTSH, DDT, DDTL, DHCR24, FAH, G6PD, GLB1, IDH2, MTPN, MYOF, NPC2, NPEPPS, PCBD1, PDXK, PEBP1, PNPO, PRDX5, QDPR, RBP4, SCRN1, SORD, TKFC, TPP1, VPS29]
GO:0006066	alcohol metabolic process	GO_BiologicalProcess-EBI-UniProt-GOA_17.02.2020_00h00	1.28395e-07	9.97631e-05	3.99243e-18	9.98108e-17	[3, 4]	Group23	6.71296	29	[ACAA2, ACO2, ACSS1, ADH4, ADH5, AKR1A1, AKR1C1, AKR1C3, AKR7A2, ALDH2, ALDH3A2, ALDH9A1, APOA1, APOE, ASAH1, CAT, DHCR24, G6PD, GLB1, IDH2, MYOF, NPC2, PCBD1, QDPR, RBP4, SCRN1, SORD, TKFC, VPS29]
GO:0016999	antibiotic metabolic process	GO_BiologicalProcess-EBI-UniProt-GOA_17.02.2020_00h00	5.91244e-06	0.00428652	3.99243e-18	9.98108e-17	[4]	Group23	9.39597	14	[ACO1, ACO2, ACSS1, ADH4, ADH5, AKR1A1, AKR1C1, AKR1C3, AKR7A2, ALDH2, ALDH9A1, CAT, PRDX5, UGGT1]
GO:1901617	organic hydroxy compound biosynthetic process	GO_BiologicalProcess-EBI-UniProt-GOA_17.02.2020_00h00	5.00048e-05	0.0327032	3.99243e-18	9.98108e-17	[4]	Group23	6.74603	17	[ACAA2, AKR1A1, AKR1C1, AKR1C3, APOA1, ASAH1, DDT, DDTL, DHCR24, G6PD, GLB1, NPEPPS, PCBD1, PDXK, PNPO, QDPR, SCRN1]
GO:0034308	primary alcohol metabolic process	GO_BiologicalProcess-EBI-UniProt-GOA_17.02.2020_00h00	2.54153e-05	0.0171299	3.99243e-18	9.98108e-17	[4, 5]	Group23	10.2804	11	[ACSS1, ADH4, ADH5, AKR1A1, AKR1C1, AKR1C3, AKR7A2, ALDH2, ALDH3A2, ALDH9A1, RBP4]
GO:0098754	detoxification	GO_BiologicalProcess-EBI-UniProt-GOA_17.02.2020_00h00	2.14314e-05	0.0145305	4.72997e-08	6.62196e-07	[1, 4]	Group24	7.93651	15	[ADH4, ADH5, AKR1A1, APOE, BANF1, CAT, GSR, GSTM3, MAT2B, MGST1, PDZK1, PRDX5, TXN, TXNDC17, TXNRD2]
GO:0009636	response to toxic substance	GO_BiologicalProcess-EBI-UniProt-GOA_17.02.2020_00h00	5.8824e-05	0.0380003	4.72997e-08	6.62196e-07	[3]	Group24	4.70085	33	[ABAT, ADH4, ADH5, AKR1A1, ALAD, APEX1, APOE, ARSA, BANF1, CAT, CNP, CPOX, EPHX1, G6PD, GGH, GSR, GSTM3, HMOX1, HNRNPA1, MAT2B, MGST1, PCNA, PDZK1, PRDX5, RBP4, RPL10A, SCRN1, TPP1, TXN, TXNDC17, TXNRD2, UBA52, UGGT1]
GO:1990748	cellular detoxification	GO_BiologicalProcess-EBI-UniProt-GOA_17.02.2020_00h00	7.45512e-06	0.00533786	4.72997e-08	6.62196e-07	[2, 5]	Group24	9.21053	14	[ADH4, ADH5, AKR1A1, APOE, BANF1, CAT, GSR, GSTM3, MAT2B, MGST1, PRDX5, TXN, TXNDC17, TXNRD2]
GO:0016651	oxidoreductase activity, acting on NAD(P)H	GO_BiologicalProcess-EBI-UniProt-GOA_17.02.2020_00h00	4.39939e-05	0.028992	4.72997e-08	6.62196e-07	[4]	Group24	8.95522	12	[ADH4, AIFM2, AKR1C1, AKR1C3, CRYZ, GSR, MAT2B, NDUFA4, TP53I3, TXN, TXNDC17, TXNRD2]
GO:0016667	oxidoreductase activity, acting on a sulfur group of donors	GO_BiologicalProcess-EBI-UniProt-GOA_17.02.2020_00h00	5.72164e-07	0.000437133	4.72997e-08	6.62196e-07	[4]	Group24	15.0685	11	[AKR1A1, GLRX5, GSR, MAT2B, PCYOX1, PDIA4, SELENBP1, TXN, TXNDC17, TXNL1, TXNRD2]
GO:0045454	cell redox homeostasis	GO_BiologicalProcess-EBI-UniProt-GOA_17.02.2020_00h00	1.09796e-05	0.0077077	4.72997e-08	6.62196e-07	[3, 4, 5]	Group24	11.2245	11	[APEX1, ERP44, GCLC, GLRX5, GSR, MAT2B, PDIA4, PRDX5, TXN, TXNL1, TXNRD2]
GO:0015036	disulfide oxidoreductase activity	GO_BiologicalProcess-EBI-UniProt-GOA_17.02.2020_00h00	1.10418e-06	0.000835861	4.72997e-08	6.62196e-07	[5]	Group24	18.3673	9	[AKR1A1, GLRX5, GSR, MAT2B, PDIA4, TXN, TXNDC17, TXNL1, TXNRD2]
GO:0016668	oxidoreductase activity, acting on a sulfur group of donors, NAD(P) as acceptor	GO_BiologicalProcess-EBI-UniProt-GOA_17.02.2020_00h00	6.13706e-05	0.0395227	4.72997e-08	6.62196e-07	[5]	Group24	25	5	[GSR, MAT2B, TXN, TXNDC17, TXNRD2]
GO:0006082	organic acid metabolic process	GO_BiologicalProcess-EBI-UniProt-GOA_17.02.2020_00h00	3.04097e-18	2.56354e-15	1.18572e-20	3.20145e-19	[3]	Group25	6.41026	80	[AARS1, ABAT, ACAA2, ACADM, ACADVL, ACO1, ACO2, ACOT1, ACOT2, ACSL1, ACSS1, ADH4, ADH5, AIFM2, AKR1A1, AKR1C1, AKR1C3, ALDH3A2, ALDH4A1, ALDH9A1, ARSA, ATIC, BANF1, BDH2, CAD, CARS1, CAT, CYB5A, DECR1, DTD1, EPRS1, FABP3, FAH, FASN, GALNS, GCLC, GGH, GLB1, GLDC, GLUL, GNS, GRHPR, GSS, HAAO, HARS1, HEXA, HEXB, HGD, HSD17B10, IDH2, IVD, KARS1, LARS1, LTA4H, MDH1, ME1, ME2, NAALAD2, NIT2, NPEPPS, OA…
GO:0044283	small molecule biosynthetic process	GO_BiologicalProcess-EBI-UniProt-GOA_17.02.2020_00h00	4.49223e-11	3.64769e-08	1.18572e-20	3.20145e-19	[3]	Group25	6.3745	48	[ABAT, ACAA2, ACSS1, ADK, AIFM2, AKR1A1, AKR1C1, AKR1C3, APOA1, ARSA, ASAH1, ATIC, BDH2, CAD, CNP, DHCR24, FASN, FBP1, G6PD, GLB1, GLUL, HAAO, LTA4H, MDH1, NAALAD2, NME1-NME2, NME2, NPEPPS, NUDT5, OAT, PCBD1, PCCB, PDXK, PGD, PNPO, PRDX5, PTGES3, QDPR, RBP4, SCRN1, SDHB, SHMT1, SHMT2, SORD, TALDO1, UGP2, UPB1, VCP]
GO:0042133	neurotransmitter metabolic process	GO_BiologicalProcess-EBI-UniProt-GOA_17.02.2020_00h00	1.02664e-05	0.00722756	1.18572e-20	3.20145e-19	[3, 4]	Group25	10.3448	12	[ABAT, AIFM2, ALDH4A1, ALDH9A1, CAT, GLDC, NAALAD2, SDHB, SHMT1, SHMT2, SORD, UPB1]
GO:0016053	organic acid biosynthetic process	GO_BiologicalProcess-EBI-UniProt-GOA_17.02.2020_00h00	1.76085e-06	0.00131359	1.18572e-20	3.20145e-19	[4]	Group25	6.49351	25	[ABAT, ACSS1, AIFM2, AKR1A1, AKR1C1, AKR1C3, ARSA, ATIC, CAD, FASN, GLUL, HAAO, LTA4H, NAALAD2, NPEPPS, OAT, PCCB, PRDX5, PTGES3, SDHB, SHMT1, SHMT2, SORD, UGP2, UPB1]
GO:0043436	oxoacid metabolic process	GO_BiologicalProcess-EBI-UniProt-GOA_17.02.2020_00h00	2.36345e-18	1.99475e-15	1.18572e-20	3.20145e-19	[4]	Group25	6.49671	79	[AARS1, ABAT, ACAA2, ACADM, ACADVL, ACO1, ACO2, ACOT1, ACOT2, ACSL1, ACSS1, ADH4, ADH5, AIFM2, AKR1A1, AKR1C1, AKR1C3, ALDH3A2, ALDH4A1, ALDH9A1, ARSA, ATIC, BDH2, CAD, CARS1, CAT, CYB5A, DECR1, DTD1, EPRS1, FABP3, FAH, FASN, GALNS, GCLC, GGH, GLB1, GLDC, GLUL, GNS, GRHPR, GSS, HAAO, HARS1, HEXA, HEXB, HGD, HSD17B10, IDH2, IVD, KARS1, LARS1, LTA4H, MDH1, ME1, ME2, NAALAD2, NIT2, NPEPPS, OAT, PCBD…
GO:1901362	organic cyclic compound biosynthetic process	GO_BiologicalProcess-EBI-UniProt-GOA_17.02.2020_00h00	1.03563e-09	8.33682e-07	1.18572e-20	3.20145e-19	[4]	Group25	4.54009	77	[ACAA2, ACSL1, ACSS1, ADK, AIFM2, AKR1A1, AKR1C1, AKR1C3, ALAD, APOA1, ATIC, ATP5ME, CAD, CENPF, CNP, CPOX, CPSF1, CPSF3, DDT, DDTL, DHCR24, DTD1, ELOC, EXOSC7, FASN, FLNA, G6PD, GLB1, GTF2I, H4C1, HAAO, IDH2, ISG15, KARS1, LEO1, LIG3, ME1, MRE11, NME1-NME2, NME2, NPEPPS, NUDT21, NUDT5, OAT, PCBD1, PCNA, PDXK, PEBP1, PFAS, PNPO, POLR2A, POLR2B, PPT1, PRMT5, PTGES3, PTPN11, QDPR, RNH1, RPA1, RPA3,…
GO:1901617	organic hydroxy compound biosynthetic process	GO_BiologicalProcess-EBI-UniProt-GOA_17.02.2020_00h00	5.00048e-05	0.0327032	1.18572e-20	3.20145e-19	[4]	Group25	6.74603	17	[ACAA2, AKR1A1, AKR1C1, AKR1C3, APOA1, ASAH1, DDT, DDTL, DHCR24, G6PD, GLB1, NPEPPS, PCBD1, PDXK, PNPO, QDPR, SCRN1]
GO:0019752	carboxylic acid metabolic process	GO_BiologicalProcess-EBI-UniProt-GOA_17.02.2020_00h00	6.29989e-19	5.33601e-16	1.18572e-20	3.20145e-19	[5]	Group25	6.84068	76	[AARS1, ABAT, ACAA2, ACADM, ACADVL, ACO1, ACO2, ACOT1, ACOT2, ACSL1, ACSS1, ADH4, ADH5, AIFM2, AKR1A1, AKR1C1, AKR1C3, ALDH3A2, ALDH4A1, ALDH9A1, ARSA, ATIC, BDH2, CAD, CARS1, CAT, CYB5A, DECR1, DTD1, EPRS1, FABP3, FAH, FASN, GCLC, GGH, GLDC, GLUL, GRHPR, GSS, HAAO, HARS1, HEXA, HEXB, HGD, HSD17B10, IDH2, IVD, KARS1, LARS1, LTA4H, MDH1, ME1, ME2, NAALAD2, NIT2, NPEPPS, OAT, PCBD1, PCCB, PCYOX1, P…
GO:0046394	carboxylic acid biosynthetic process	GO_BiologicalProcess-EBI-UniProt-GOA_17.02.2020_00h00	1.60309e-06	0.00120232	1.18572e-20	3.20145e-19	[5, 6]	Group25	6.52742	25	[ABAT, ACSS1, AIFM2, AKR1A1, AKR1C1, AKR1C3, ARSA, ATIC, CAD, FASN, GLUL, HAAO, LTA4H, NAALAD2, NPEPPS, OAT, PCCB, PRDX5, PTGES3, SDHB, SHMT1, SHMT2, SORD, UGP2, UPB1]
GO:0071826	ribonucleoprotein complex subunit organization	GO_BiologicalProcess-EBI-UniProt-GOA_17.02.2020_00h00	5.24057e-06	0.00381513	1.02929e-10	1.85273e-09	[4]	Group26	7.36434	19	[ADAR, CPSF6, DDX1, EIF2S3, EIF2S3B, EIF3B, HARS1, NUDT21, PEBP1, PRMT5, PRPF19, PRPF8, PTGES3, RPSA, SNRNP200, SNRPD1, SNRPD3, STRAP, VCP]
GO:0022618	ribonucleoprotein complex assembly	GO_BiologicalProcess-EBI-UniProt-GOA_17.02.2020_00h00	1.33086e-05	0.0092495	1.02929e-10	1.85273e-09	[4, 5, 6]	Group26	7.17131	18	[ADAR, CPSF6, DDX1, EIF2S3, EIF2S3B, EIF3B, HARS1, NUDT21, PEBP1, PRMT5, PRPF19, PRPF8, PTGES3, RPSA, SNRNP200, SNRPD1, SNRPD3, STRAP]
GO:0034622	cellular protein-containing complex assembly	GO_BiologicalProcess-EBI-UniProt-GOA_17.02.2020_00h00	1.31962e-08	1.04382e-05	1.02929e-10	1.85273e-09	[5]	Group26	5.16385	52	[ADAR, ARPC4, ARPC4-TTLL3, CALR, CENPF, CLTC, COX7A2, CPSF6, DDB1, DDX1, DNAJB12, EIF2S3, EIF2S3B, EIF3B, FGG, FKBP1A, FKBP4, H2BC17, H2BC21, H2BC3, H2BU1, H4C1, HARS1, LAP3, MCM2, MCM5, NUDT21, PEBP1, PRMT5, PRPF19, PRPF8, PSMD10, PTGES3, RBBP4, RPA1, RPA3, RPS27A, RPSA, SET, SETSIP, SMARCA5, SNRNP200, SNRPD1, SNRPD3, ST13, STRAP, UBA52, UBB, UBC, UQCRB, YWHAB, YWHAQ]
GO:0016071	mRNA metabolic process	GO_BiologicalProcess-EBI-UniProt-GOA_17.02.2020_00h00	2.84044e-06	0.00209909	1.02929e-10	1.85273e-09	[6, 7]	Group26	4.77816	42	[ADAR, CPSF1, CPSF3, CPSF6, DDX1, ELAVL1, EXOSC7, FLNA, HARS1, HNRNPA1, HNRNPA1L2, HNRNPF, HNRNPH1, IGFBP7, LEO1, MAGOHB, NUDT21, PABPC1, PDCD11, PEBP1, POLR2A, POLR2B, PPIL1, PRMT5, PRPF19, PRPF8, RALY, RNH1, RPL10A, RPS27A, RPSA, SF3B3, SNRNP200, SNRPD1, SNRPD3, SRSF2, STRAP, THOC2, UBA52, UPF1, WDR61, XRN2]
GO:0006397	mRNA processing	GO_BiologicalProcess-EBI-UniProt-GOA_17.02.2020_00h00	2.91465e-06	0.00215101	1.02929e-10	1.85273e-09	[6, 7, 8]	Group26	5.47264	33	[ADAR, CPSF1, CPSF3, CPSF6, DDX1, ELAVL1, HARS1, HNRNPA1, HNRNPA1L2, HNRNPF, HNRNPH1, IGFBP7, LEO1, MAGOHB, NUDT21, PABPC1, PDCD11, PEBP1, POLR2A, POLR2B, PPIL1, PRMT5, PRPF19, PRPF8, RALY, SF3B3, SNRNP200, SNRPD1, SNRPD3, SRSF2, STRAP, THOC2, XRN2]
GO:0008380	RNA splicing	GO_BiologicalProcess-EBI-UniProt-GOA_17.02.2020_00h00	1.58074e-06	0.00118714	1.02929e-10	1.85273e-09	[6, 7, 8]	Group26	5.94262	29	[CPSF1, CPSF3, DDX1, ELAVL1, HARS1, HNRNPA1, HNRNPA1L2, HNRNPF, HNRNPH1, IGFBP7, MAGOHB, NUDT21, PABPC1, PEBP1, POLR2A, POLR2B, PPIL1, PRMT5, PRPF19, PRPF8, PTPN11, RALY, SF3B3, SNRNP200, SNRPD1, SNRPD3, SRSF2, STRAP, THOC2]
GO:0000375	RNA splicing, via transesterification reactions	GO_BiologicalProcess-EBI-UniProt-GOA_17.02.2020_00h00	2.4205e-07	0.000186863	1.02929e-10	1.85273e-09	[7, 8, 9]	Group26	7.02703	26	[CPSF1, CPSF3, DDX1, ELAVL1, HARS1, HNRNPA1, HNRNPF, HNRNPH1, IGFBP7, MAGOHB, NUDT21, PABPC1, PEBP1, POLR2A, POLR2B, PPIL1, PRMT5, PRPF19, PRPF8, RALY, SF3B3, SNRNP200, SNRPD1, SNRPD3, SRSF2, STRAP]
GO:0000377	RNA splicing, via transesterification reactions with bulged adenosine as nucleophile	GO_BiologicalProcess-EBI-UniProt-GOA_17.02.2020_00h00	2.06613e-07	0.000159712	1.02929e-10	1.85273e-09	[8, 9, 10]	Group26	7.08447	26	[CPSF1, CPSF3, DDX1, ELAVL1, HARS1, HNRNPA1, HNRNPF, HNRNPH1, IGFBP7, MAGOHB, NUDT21, PABPC1, PEBP1, POLR2A, POLR2B, PPIL1, PRMT5, PRPF19, PRPF8, RALY, SF3B3, SNRNP200, SNRPD1, SNRPD3, SRSF2, STRAP]
GO:0000398	mRNA splicing, via spliceosome	GO_BiologicalProcess-EBI-UniProt-GOA_17.02.2020_00h00	2.06613e-07	0.000159712	1.02929e-10	1.85273e-09	[7, 8, 9, 10, 11]	Group26	7.08447	26	[CPSF1, CPSF3, DDX1, ELAVL1, HARS1, HNRNPA1, HNRNPF, HNRNPH1, IGFBP7, MAGOHB, NUDT21, PABPC1, PEBP1, POLR2A, POLR2B, PPIL1, PRMT5, PRPF19, PRPF8, RALY, SF3B3, SNRNP200, SNRPD1, SNRPD3, SRSF2, STRAP]
GO:0006091	generation of precursor metabolites and energy	GO_BiologicalProcess-EBI-UniProt-GOA_17.02.2020_00h00	1.12862e-14	9.37882e-12	3.28295e-17	7.87907e-16	[3]	Group27	8.62745	44	[ACADM, ACADVL, ACO1, ACO2, ACSS1, ADH4, ADH5, AIFM2, AKR1A1, AKR7A2, ALDH2, ALDH4A1, ALDH9A1, ARSA, ATP5ME, BDH2, CAT, COX7A2, CYB5A, G6PD, GAA, GLDC, GLRX5, GSR, HAAO, IDH2, MAT2B, MDH1, ME1, ME2, NDUFA4, PGD, PGM2, PTGES3, PYGB, QDPR, RBKS, SDHB, SORD, TALDO1, TSTA3, TXNRD2, UGP2, UQCRB]
GO:0016491	oxidoreductase activity	GO_BiologicalProcess-EBI-UniProt-GOA_17.02.2020_00h00	1.51117e-14	1.25427e-11	3.28295e-17	7.87907e-16	[3]	Group27	6.76606	59	[ACADM, ACADVL, ADH4, ADH5, AIFM2, AKR1A1, AKR1C1, AKR1C3, AKR7A2, ALDH2, ALDH3A2, ALDH4A1, ALDH9A1, APEX1, ARSA, BDH2, BLVRB, CAT, COX7A2, CPOX, CRYZ, CYB5A, DECR1, DHCR24, FASN, G6PD, GLDC, GLRX5, GRHPR, GSR, HAAO, HGD, HMOX1, HSD17B10, IDH2, IVD, MAT2B, MDH1, ME1, ME2, MGST1, NDUFA4, PCBD1, PCYOX1, PDIA4, PGD, PNPO, PRDX5, QDPR, SDHB, SELENBP1, SORD, TP53I3, TSTA3, TXN, TXNDC17, TXNL1, TXNRD2,…
GO:0044282	small molecule catabolic process	GO_BiologicalProcess-EBI-UniProt-GOA_17.02.2020_00h00	1.25127e-12	1.02979e-09	3.28295e-17	7.87907e-16	[3]	Group27	7.67857	43	[ABAT, ACAA2, ACADM, ACADVL, ADH4, ADH5, AKR1A1, AKR1C1, AKR1C3, ALDH2, ALDH3A2, ALDH4A1, ALDH9A1, APOE, BDH2, DECR1, FAH, GALE, GLB1, GLDC, GLUL, HAAO, HEXA, HEXB, HGD, HSD17B10, IVD, NUDT5, OAT, PCBD1, PCCB, PCYOX1, PGD, PGM2, PRDX5, QDPR, RBKS, SDHB, SHMT1, SHMT2, SORD, TKFC, UPB1]
GO:0015980	energy derivation by oxidation of organic compounds	GO_BiologicalProcess-EBI-UniProt-GOA_17.02.2020_00h00	3.36086e-05	0.0223497	3.28295e-17	7.87907e-16	[3, 4]	Group27	6.69145	18	[ACADM, ACADVL, ACO1, ACO2, AIFM2, CAT, GAA, IDH2, MDH1, ME2, NDUFA4, PGM2, PTGES3, PYGB, SDHB, SORD, UGP2, UQCRB]
GO:0022900	electron transport chain	GO_BiologicalProcess-EBI-UniProt-GOA_17.02.2020_00h00	3.74436e-11	3.04416e-08	3.28295e-17	7.87907e-16	[3, 4]	Group27	11.5942	24	[ADH5, AIFM2, AKR1A1, AKR7A2, ALDH2, ALDH4A1, ALDH9A1, ARSA, COX7A2, CYB5A, GLDC, GLRX5, GSR, HAAO, MAT2B, ME1, ME2, NDUFA4, QDPR, SDHB, SORD, TSTA3, TXNRD2, UQCRB]
GO:0016614	oxidoreductase activity, acting on CH-OH group of donors	GO_BiologicalProcess-EBI-UniProt-GOA_17.02.2020_00h00	2.27834e-09	1.82723e-06	3.28295e-17	7.87907e-16	[4]	Group27	12.0253	19	[ADH4, ADH5, AKR1A1, AKR1C1, AKR1C3, AKR7A2, ALDH3A2, BDH2, FASN, G6PD, GRHPR, HSD17B10, IDH2, MDH1, ME1, ME2, PGD, SORD, TSTA3]
GO:0009055	electron transfer activity	GO_BiologicalProcess-EBI-UniProt-GOA_17.02.2020_00h00	4.3121e-15	3.58767e-12	3.28295e-17	7.87907e-16	[4, 5]	Group27	17.3913	24	[ADH5, AIFM2, AKR1A1, AKR7A2, ALDH2, ALDH4A1, ALDH9A1, ARSA, COX7A2, CYB5A, GLDC, GLRX5, GSR, HAAO, MAT2B, ME1, ME2, NDUFA4, QDPR, SDHB, SORD, TSTA3, TXNRD2, UQCRB]
GO:0016616	oxidoreductase activity, acting on the CH-OH group of donors, NAD or NADP as acceptor	GO_BiologicalProcess-EBI-UniProt-GOA_17.02.2020_00h00	6.2522e-09	4.96425e-06	3.28295e-17	7.87907e-16	[5]	Group27	12	18	[ADH4, ADH5, AKR1A1, AKR1C1, AKR1C3, AKR7A2, BDH2, FASN, G6PD, GRHPR, HSD17B10, IDH2, MDH1, ME1, ME2, PGD, SORD, TSTA3]
GO:0032787	monocarboxylic acid metabolic process	GO_BiologicalProcess-EBI-UniProt-GOA_17.02.2020_00h00	4.29312e-09	3.42591e-06	3.28295e-17	7.87907e-16	[6]	Group27	6.1194	41	[ABAT, ACAA2, ACADM, ACADVL, ACOT1, ACOT2, ACSL1, ACSS1, ADH4, ADH5, AKR1A1, AKR1C1, AKR1C3, ALDH3A2, ALDH4A1, ALDH9A1, ARSA, BDH2, CAT, DECR1, FABP3, FAH, FASN, GRHPR, HAAO, HSD17B10, IDH2, IVD, LTA4H, ME1, ME2, NIT2, PCCB, PGD, PRDX5, PTGES3, SCRN1, SDHB, SORD, UGGT1, UGT2A1]
GO:0009057	macromolecule catabolic process	GO_BiologicalProcess-EBI-UniProt-GOA_17.02.2020_00h00	1.07557e-08	8.51852e-06	7.80458e-16	1.79505e-14	[4]	Group28	4.78026	62	[AP2A2, APOE, CAD, CAPN1, CLTC, CPOX, CPVL, CTSA, CTSB, CTSC, CTSD, CTSH, DDB1, DNAJB12, ELOC, EXOSC7, FUCA1, GAA, GALNS, GLB1, GNS, HEXA, HEXB, IDE, ISG15, MAGOHB, PABPC1, PCYOX1, PGM2, PPT1, PRPF19, PSMA1, PSMA6, PSMB1, PSMB2, PSMB3, PSMB4, PSMB5, PSMD10, PSMD12, PSMD6, PYGB, RNASET2, RNH1, RPL10A, RPS27A, RPSA, STT3B, TALDO1, TBL1XR1, TPP1, UBA52, UBB, UBC, UBXN4, UCHL1, UGGT1, UPF1, VCP, WDR1…
GO:1901565	organonitrogen compound catabolic process	GO_BiologicalProcess-EBI-UniProt-GOA_17.02.2020_00h00	8.40611e-14	6.96026e-11	7.80458e-16	1.79505e-14	[4]	Group28	5.60538	75	[ABAT, ALDH4A1, ALDH9A1, AP2A2, APOE, ASAH1, BLVRB, CLTC, CPOX, CPQ, CPVL, CTSA, CTSB, CTSC, CTSD, CTSH, DDB1, DNAJB12, ELOC, EXOSC7, FAH, FUCA1, GALNS, GLB1, GLDC, GLUL, GNS, HAAO, HEXA, HEXB, HGD, HMOX1, HSD17B10, IDE, ISG15, IVD, LTA4H, NAGA, NEU1, NPEPPS, OAT, PCBD1, PCYOX1, PPT1, PRDX5, PRPF19, PSMA1, PSMA6, PSMB1, PSMB2, PSMB3, PSMB4, PSMB5, PSMD10, PSMD12, PSMD6, QDPR, RPS27A, SDHB, SHMT1,…
GO:0006508	proteolysis	GO_BiologicalProcess-EBI-UniProt-GOA_17.02.2020_00h00	4.20326e-08	3.30376e-05	7.80458e-16	1.79505e-14	[4, 5]	Group28	4.3949	69	[ACTL6A, APEH, CAPN1, CNDP2, COPS6, CPD, CPOX, CPQ, CPVL, CTSA, CTSB, CTSC, CTSD, CTSH, DDB1, DHCR24, DNAJB12, DNPEP, DPP3, DPP7, ELOC, ERMP1, EXOSC7, FGG, GGH, HARS1, IDE, IGFBP7, ISG15, LAP3, LTA4H, METAP1, MYH9, NAALAD2, NLN, NPEPPS, PCYOX1, PITRM1, PRCP, PRPF19, PSMA1, PSMA6, PSMB1, PSMB2, PSMB3, PSMB4, PSMB5, PSMD10, PSMD12, PSMD6, RNPEP, RPS27A, SCRN1, SCRN2, SHMT1, SHMT2, STT3B, SUB1, TBL1…
GO:0030163	protein catabolic process	GO_BiologicalProcess-EBI-UniProt-GOA_17.02.2020_00h00	1.88172e-06	0.0014	7.80458e-16	1.79505e-14	[4, 5]	Group28	4.91228	42	[AP2A2, APOE, CLTC, CPOX, CPVL, CTSA, CTSB, CTSC, CTSD, CTSH, DDB1, DNAJB12, ELOC, EXOSC7, IDE, ISG15, PCYOX1, PPT1, PRPF19, PSMA1, PSMA6, PSMB1, PSMB2, PSMB3, PSMB4, PSMB5, PSMD10, PSMD12, PSMD6, RPS27A, STT3B, TALDO1, TBL1XR1, TPP1, UBA52, UBB, UBC, UBXN4, UCHL1, UGGT1, VCP, WDR1]
GO:0044265	cellular macromolecule catabolic process	GO_BiologicalProcess-EBI-UniProt-GOA_17.02.2020_00h00	2.1333e-05	0.0144851	7.80458e-16	1.79505e-14	[4, 5]	Group28	4.21147	47	[AP2A2, CAD, CLTC, CPVL, CTSA, CTSB, CTSC, CTSH, DDB1, DNAJB12, ELOC, EXOSC7, IDE, ISG15, MAGOHB, PABPC1, PCYOX1, PPT1, PRPF19, PSMA1, PSMA6, PSMB1, PSMB2, PSMB3, PSMB4, PSMB5, PSMD10, PSMD12, PSMD6, RNASET2, RNH1, RPL10A, RPS27A, RPSA, STT3B, TBL1XR1, UBA52, UBB, UBC, UBXN4, UCHL1, UGGT1, UPF1, VCP, WDR1, WDR61, XRN2]
GO:0008233	peptidase activity	GO_BiologicalProcess-EBI-UniProt-GOA_17.02.2020_00h00	1.66646e-07	0.000129318	7.80458e-16	1.79505e-14	[5, 6]	Group28	5.30973	42	[APEH, CAPN1, CNDP2, CPD, CPOX, CPQ, CPVL, CTSA, CTSB, CTSC, CTSD, CTSH, DNPEP, DPP3, DPP7, ERMP1, GGH, IDE, IGFBP7, LAP3, LTA4H, METAP1, NAALAD2, NLN, NPEPPS, PITRM1, PRCP, PSMA1, PSMA6, PSMB1, PSMB2, PSMB3, PSMB4, PSMB5, RNPEP, SCRN1, SCRN2, SHMT1, SUB1, TPP1, TPP2, UCHL1]
GO:0044257	cellular protein catabolic process	GO_BiologicalProcess-EBI-UniProt-GOA_17.02.2020_00h00	1.18918e-05	0.0083005	7.80458e-16	1.79505e-14	[5, 6]	Group28	4.84928	37	[AP2A2, CLTC, CPVL, CTSA, CTSB, CTSC, CTSH, DDB1, DNAJB12, ELOC, EXOSC7, IDE, ISG15, PCYOX1, PPT1, PRPF19, PSMA1, PSMA6, PSMB1, PSMB2, PSMB3, PSMB4, PSMB5, PSMD10, PSMD12, PSMD6, RPS27A, STT3B, TBL1XR1, UBA52, UBB, UBC, UBXN4, UCHL1, UGGT1, VCP, WDR1]
GO:0051603	proteolysis involved in cellular protein catabolic process	GO_BiologicalProcess-EBI-UniProt-GOA_17.02.2020_00h00	3.87395e-05	0.0256456	7.80458e-16	1.79505e-14	[5, 6, 7]	Group28	4.7486	34	[CPVL, CTSA, CTSB, CTSC, CTSH, DDB1, DNAJB12, ELOC, EXOSC7, IDE, ISG15, PCYOX1, PRPF19, PSMA1, PSMA6, PSMB1, PSMB2, PSMB3, PSMB4, PSMB5, PSMD10, PSMD12, PSMD6, RPS27A, STT3B, TBL1XR1, UBA52, UBB, UBC, UBXN4, UCHL1, UGGT1, VCP, WDR1]
GO:0010498	proteasomal protein catabolic process	GO_BiologicalProcess-EBI-UniProt-GOA_17.02.2020_00h00	2.32081e-05	0.0157119	7.80458e-16	1.79505e-14	[5, 6, 7, 8]	Group28	5.72792	24	[DDB1, DNAJB12, EXOSC7, PRPF19, PSMA1, PSMA6, PSMB1, PSMB2, PSMB3, PSMB4, PSMB5, PSMD10, PSMD12, PSMD6, RPS27A, STT3B, TBL1XR1, UBA52, UBB, UBC, UBXN4, UCHL1, UGGT1, VCP]
GO:0070011	peptidase activity, acting on L-amino acid peptides	GO_BiologicalProcess-EBI-UniProt-GOA_17.02.2020_00h00	8.43329e-08	6.5864e-05	7.80458e-16	1.79505e-14	[6, 7]	Group28	5.49738	42	[APEH, CAPN1, CNDP2, CPD, CPOX, CPQ, CPVL, CTSA, CTSB, CTSC, CTSD, CTSH, DNPEP, DPP3, DPP7, ERMP1, GGH, IDE, IGFBP7, LAP3, LTA4H, METAP1, NAALAD2, NLN, NPEPPS, PITRM1, PRCP, PSMA1, PSMA6, PSMB1, PSMB2, PSMB3, PSMB4, PSMB5, RNPEP, SCRN1, SCRN2, SHMT1, SUB1, TPP1, TPP2, UCHL1]
GO:0070646	protein modification by small protein removal	GO_BiologicalProcess-EBI-UniProt-GOA_17.02.2020_00h00	7.60059e-05	0.0484158	7.80458e-16	1.79505e-14	[5, 6, 7, 8]	Group28	5.72207	21	[ACTL6A, COPS6, HARS1, PSMA1, PSMA6, PSMB1, PSMB2, PSMB3, PSMB4, PSMB5, PSMD10, PSMD12, PSMD6, RPS27A, SHMT1, SHMT2, UBA52, UBB, UBC, UCHL1, VCP]
GO:0008238	exopeptidase activity	GO_BiologicalProcess-EBI-UniProt-GOA_17.02.2020_00h00	2.36206e-14	1.95815e-11	7.80458e-16	1.79505e-14	[7, 8]	Group28	15.3374	25	[APEH, CNDP2, CPD, CPOX, CPQ, CPVL, CTSA, CTSB, CTSH, DNPEP, DPP3, DPP7, GGH, LAP3, LTA4H, METAP1, NAALAD2, NPEPPS, PRCP, RNPEP, SCRN1, SCRN2, TPP1, TPP2, UCHL1]
GO:0043161	proteasome-mediated ubiquitin-dependent protein catabolic process	GO_BiologicalProcess-EBI-UniProt-GOA_17.02.2020_00h00	4.4967e-05	0.0294983	7.80458e-16	1.79505e-14	[6, 7, 8, 9, 10]	Group28	5.77428	22	[DDB1, DNAJB12, EXOSC7, PSMA1, PSMA6, PSMB1, PSMB2, PSMB3, PSMB4, PSMB5, PSMD10, PSMD12, PSMD6, RPS27A, STT3B, TBL1XR1, UBA52, UBB, UBC, UBXN4, UCHL1, VCP]
GO:0034641	cellular nitrogen compound metabolic process	GO_BiologicalProcess-EBI-UniProt-GOA_17.02.2020_00h00	4.81573e-18	4.05485e-15	8.50193e-23	2.55058e-21	[3]	Group29	4.09399	169	[AARS1, ACADM, ACOT1, ACOT2, ACSL1, ACSS1, ACTL6A, ADAR, ADK, AIFM2, ALAD, ALDH4A1, ALDH9A1, APEH, APEX1, ARSA, ASAH1, ATIC, ATP5ME, BANF1, BDH2, BLVRB, CAD, CARS1, CAT, CENPF, CNDP2, CNP, COPS6, CPD, CPOX, CPQ, CPSF1, CPSF3, CPSF6, CTSB, CTSH, DDB1, DDX1, DNPEP, DTD1, EIF2S3, EIF2S3B, EIF3B, EIF4H, EIF5A, EIF5A2, EIF5AL1, ELAVL1, ELOC, EMG1, EPRS1, ERH, EXOSC7, FASN, FLNA, FSCN1, G6PD, GCLC, GGC…
GO:0044249	cellular biosynthetic process	GO_BiologicalProcess-EBI-UniProt-GOA_17.02.2020_00h00	8.76808e-14	7.2512e-11	8.50193e-23	2.55058e-21	[3]	Group29	4.0677	137	[AARS1, ABAT, ACADM, ACSL1, ACSS1, ADH5, ADK, AIFM2, AKR1A1, AKR1C1, AKR1C3, ALAD, ALDH3A2, ALDH4A1, ALDH9A1, APEH, APEX1, APOA1, APOE, ARSA, ASAH1, ATIC, ATP5ME, BDH2, CAD, CARS1, CENPF, CNDP2, CNP, CPOX, CPSF1, CPSF3, CSNK2A1, CSNK2A2, DAD1, DDT, DDTL, DTD1, EIF2S3, EIF2S3B, EIF3B, EIF4H, EIF5A, EIF5A2, EIF5AL1, ELOC, EPRS1, EXOSC7, FASN, FBP1, FLNA, GALNT3, GALNT6, GCLC, GGCT, GLUL, GSS, GSTM3…
GO:0044283	small molecule biosynthetic process	GO_BiologicalProcess-EBI-UniProt-GOA_17.02.2020_00h00	4.49223e-11	3.64769e-08	8.50193e-23	2.55058e-21	[3]	Group29	6.3745	48	[ABAT, ACAA2, ACSS1, ADK, AIFM2, AKR1A1, AKR1C1, AKR1C3, APOA1, ARSA, ASAH1, ATIC, BDH2, CAD, CNP, DHCR24, FASN, FBP1, G6PD, GLB1, GLUL, HAAO, LTA4H, MDH1, NAALAD2, NME1-NME2, NME2, NPEPPS, NUDT5, OAT, PCBD1, PCCB, PDXK, PGD, PNPO, PRDX5, PTGES3, QDPR, RBP4, SCRN1, SDHB, SHMT1, SHMT2, SORD, TALDO1, UGP2, UPB1, VCP]
GO:1901360	organic cyclic compound metabolic process	GO_BiologicalProcess-EBI-UniProt-GOA_17.02.2020_00h00	4.67595e-16	3.89974e-13	8.50193e-23	2.55058e-21	[3]	Group29	4.03679	158	[AARS1, ACAA2, ACOT1, ACOT2, ACSL1, ACSS1, ACTL6A, ADAR, ADK, AFP, AIFM2, AKR1A1, AKR1C1, AKR1C3, AKR7A2, ALAD, ALDH4A1, ALDH9A1, APEX1, APOA1, APOE, ATIC, ATP5ME, BANF1, BDH2, BLVRB, CAD, CARS1, CAT, CENPF, CNP, COPS6, CPOX, CPQ, CPSF1, CPSF3, CPSF6, CTSB, CTSH, DDB1, DDT, DDTL, DDX1, DHCR24, DTD1, ELAVL1, ELOC, EMG1, EPHX1, EPRS1, ERH, EXOSC7, FAH, FASN, FLNA, FSCN1, G6PD, GGH, GLB1, GLUL, GSR,…
GO:1901576	organic substance biosynthetic process	GO_BiologicalProcess-EBI-UniProt-GOA_17.02.2020_00h00	3.31159e-17	2.77843e-14	8.50193e-23	2.55058e-21	[3]	Group29	4.27056	149	[AARS1, ABAT, ACAA2, ACADM, ACSL1, ACSS1, ADH5, ADK, AIFM2, AKR1A1, AKR1C1, AKR1C3, ALAD, ALDH3A2, ALDH4A1, ALDH9A1, APEH, APEX1, APOA1, APOE, ARSA, ASAH1, ATIC, ATP5ME, BDH2, CAD, CARS1, CENPF, CNDP2, CNP, CPOX, CPSF1, CPSF3, CSNK2A1, CSNK2A2, DAD1, DDT, DDTL, DHCR24, DTD1, EIF2S3, EIF2S3B, EIF3B, EIF4H, EIF5A, EIF5A2, EIF5AL1, ELOC, EPRS1, EXOSC7, FASN, FBP1, FLNA, G6PD, GALNT3, GALNT6, GCLC, G…
GO:0018130	heterocycle biosynthetic process	GO_BiologicalProcess-EBI-UniProt-GOA_17.02.2020_00h00	7.47873e-08	5.85585e-05	8.50193e-23	2.55058e-21	[4]	Group29	4.37956	66	[ACSL1, ACSS1, ADK, AIFM2, ALAD, ATIC, ATP5ME, CAD, CENPF, CNP, CPOX, CPSF1, CPSF3, DTD1, ELOC, EXOSC7, FASN, FLNA, GTF2I, H4C1, HAAO, IDH2, ISG15, KARS1, LEO1, LIG3, ME1, MRE11, NME1-NME2, NME2, NPEPPS, NUDT21, NUDT5, OAT, PCBD1, PCNA, PDXK, PEBP1, PFAS, PNPO, POLR2A, POLR2B, PPT1, PRMT5, PTGES3, PTPN11, QDPR, RNH1, RPA1, RPA3, RPS27A, SHMT1, SMARCA5, SNRPD3, SORD, SSRP1, SUPT16H, TSTA3, TXN, UB…
GO:0019438	aromatic compound biosynthetic process	GO_BiologicalProcess-EBI-UniProt-GOA_17.02.2020_00h00	8.43223e-08	6.594e-05	8.50193e-23	2.55058e-21	[4]	Group29	4.37622	67	[ACSL1, ACSS1, ADK, AIFM2, ALAD, ATIC, ATP5ME, CAD, CENPF, CNP, CPOX, CPSF1, CPSF3, DDT, DDTL, DTD1, ELOC, EXOSC7, FASN, FLNA, GTF2I, H4C1, HAAO, IDH2, ISG15, KARS1, LEO1, LIG3, ME1, MRE11, NME1-NME2, NME2, NPEPPS, NUDT21, NUDT5, PCBD1, PCNA, PDXK, PEBP1, PFAS, PNPO, POLR2A, POLR2B, PPT1, PRMT5, PTGES3, PTPN11, QDPR, RNH1, RPA1, RPA3, RPS27A, SHMT1, SMARCA5, SNRPD3, SORD, SSRP1, SUPT16H, TSTA3, T…
GO:0043603	cellular amide metabolic process	GO_BiologicalProcess-EBI-UniProt-GOA_17.02.2020_00h00	3.71071e-15	3.09102e-12	8.50193e-23	2.55058e-21	[4]	Group29	6.50651	65	[AARS1, ACOT1, ACOT2, ACSL1, ACSS1, APEH, ARSA, ASAH1, ATIC, BDH2, CARS1, CAT, CNDP2, CPD, CPQ, CTSB, CTSH, DNPEP, DTD1, EIF2S3, EIF2S3B, EIF3B, EIF4H, EIF5A, EIF5A2, EIF5AL1, EPRS1, FASN, G6PD, GCLC, GGCT, GGH, GLUL, GSR, GSS, GSTM3, HARS1, HEXB, IDE, IGFBP7, KARS1, LARS1, LTA4H, MGST1, NAGA, NEU1, NIT2, NLN, NPEPPS, PABPC1, PCCB, PPT1, PRMT1, RACK1, RPL10A, RPS27A, RPSA, SCRN1, SHMT1, SHMT2, SU…
GO:0044271	cellular nitrogen compound biosynthetic process	GO_BiologicalProcess-EBI-UniProt-GOA_17.02.2020_00h00	3.8959e-12	3.19074e-09	8.50193e-23	2.55058e-21	[4]	Group29	4.55854	95	[AARS1, ACADM, ACSL1, ACSS1, ADK, AIFM2, ALAD, ALDH4A1, ALDH9A1, APEH, ARSA, ASAH1, ATIC, ATP5ME, BDH2, CAD, CARS1, CENPF, CNDP2, CNP, CPOX, CPSF1, CPSF3, DTD1, EIF2S3, EIF2S3B, EIF3B, EIF4H, EIF5A, EIF5A2, EIF5AL1, ELOC, EPRS1, EXOSC7, FASN, FLNA, GCLC, GGCT, GLUL, GSS, GTF2I, H4C1, HAAO, HARS1, IDH2, ISG15, KARS1, LARS1, LEO1, LIG3, ME1, MRE11, NME1-NME2, NME2, NPEPPS, NUDT21, NUDT5, PABPC1, PC…
GO:1901362	organic cyclic compound biosynthetic process	GO_BiologicalProcess-EBI-UniProt-GOA_17.02.2020_00h00	1.03563e-09	8.33682e-07	8.50193e-23	2.55058e-21	[4]	Group29	4.54009	77	[ACAA2, ACSL1, ACSS1, ADK, AIFM2, AKR1A1, AKR1C1, AKR1C3, ALAD, APOA1, ATIC, ATP5ME, CAD, CENPF, CNP, CPOX, CPSF1, CPSF3, DDT, DDTL, DHCR24, DTD1, ELOC, EXOSC7, FASN, FLNA, G6PD, GLB1, GTF2I, H4C1, HAAO, IDH2, ISG15, KARS1, LEO1, LIG3, ME1, MRE11, NME1-NME2, NME2, NPEPPS, NUDT21, NUDT5, OAT, PCBD1, PCNA, PDXK, PEBP1, PFAS, PNPO, POLR2A, POLR2B, PPT1, PRMT5, PTGES3, PTPN11, QDPR, RNH1, RPA1, RPA3,…
GO:1901566	organonitrogen compound biosynthetic process	GO_BiologicalProcess-EBI-UniProt-GOA_17.02.2020_00h00	1.62798e-10	1.3154e-07	8.50193e-23	2.55058e-21	[4]	Group29	4.66903	79	[AARS1, ABAT, ACADM, ACSL1, ACSS1, ADH5, ADK, AIFM2, AKR1A1, ALAD, ALDH3A2, ALDH4A1, ALDH9A1, APEH, APOA1, APOE, ARSA, ASAH1, ATIC, ATP5ME, BDH2, CAD, CARS1, CNDP2, CPOX, CSNK2A1, CSNK2A2, DAD1, DTD1, EIF2S3, EIF2S3B, EIF3B, EIF4H, EIF5A, EIF5A2, EIF5AL1, EPRS1, FASN, GALNT3, GALNT6, GCLC, GGCT, GLUL, GSS, GSTM3, HAAO, HARS1, HEXA, IDH2, IL18, KARS1, LARS1, MGST1, NAALAD2, NME1-NME2, NME2, NMT1, …
GO:0006518	peptide metabolic process	GO_BiologicalProcess-EBI-UniProt-GOA_17.02.2020_00h00	7.14971e-12	5.84132e-09	8.50193e-23	2.55058e-21	[4, 5]	Group29	6.92771	46	[AARS1, APEH, BDH2, CARS1, CNDP2, CPD, CPQ, CTSB, CTSH, DNPEP, DTD1, EIF2S3, EIF2S3B, EIF3B, EIF4H, EIF5A, EIF5A2, EIF5AL1, EPRS1, G6PD, GCLC, GGCT, GLUL, GSR, GSS, GSTM3, HARS1, IDE, IGFBP7, KARS1, LARS1, LTA4H, MGST1, NLN, NPEPPS, PABPC1, RACK1, RPL10A, RPS27A, RPSA, SCRN1, SUB1, TARS1, TP53I3, TPP1, UBA52]
GO:0034654	nucleobase-containing compound biosynthetic process	GO_BiologicalProcess-EBI-UniProt-GOA_17.02.2020_00h00	1.21024e-05	0.00843535	8.50193e-23	2.55058e-21	[4, 5]	Group29	4.01691	57	[ACSL1, ACSS1, ADK, ATIC, ATP5ME, CAD, CENPF, CNP, CPSF1, CPSF3, DTD1, ELOC, EXOSC7, FASN, FLNA, GTF2I, H4C1, HAAO, IDH2, ISG15, KARS1, LEO1, LIG3, ME1, MRE11, NME1-NME2, NME2, NUDT21, NUDT5, PCNA, PEBP1, PFAS, POLR2A, POLR2B, PPT1, PRMT5, PTGES3, PTPN11, RNH1, RPA1, RPA3, RPS27A, SHMT1, SMARCA5, SNRPD3, SORD, SSRP1, SUPT16H, TSTA3, TXN, UBA52, UBB, UBC, UGP2, VCP, WDR61, XRN2]
GO:0043604	amide biosynthetic process	GO_BiologicalProcess-EBI-UniProt-GOA_17.02.2020_00h00	4.78945e-07	0.000366872	8.50193e-23	2.55058e-21	[5]	Group29	5.52995	36	[AARS1, ACSL1, ACSS1, APEH, ARSA, ASAH1, ATIC, BDH2, CARS1, CNDP2, DTD1, EIF2S3, EIF2S3B, EIF3B, EIF4H, EIF5A, EIF5A2, EIF5AL1, EPRS1, FASN, GCLC, GGCT, GLUL, GSS, HARS1, KARS1, LARS1, PABPC1, PPT1, RACK1, RPL10A, RPS27A, RPSA, TARS1, TP53I3, UBA52]
GO:0043038	amino acid activation	GO_BiologicalProcess-EBI-UniProt-GOA_17.02.2020_00h00	1.42709e-05	0.00987546	8.50193e-23	2.55058e-21	[4, 5, 7]	Group29	13.6364	9	[AARS1, CARS1, DTD1, EPRS1, GLUL, HARS1, KARS1, LARS1, TARS1]
GO:0043043	peptide biosynthetic process	GO_BiologicalProcess-EBI-UniProt-GOA_17.02.2020_00h00	1.78604e-06	0.0013306	8.50193e-23	2.55058e-21	[5, 6]	Group29	5.90631	29	[AARS1, APEH, BDH2, CARS1, CNDP2, DTD1, EIF2S3, EIF2S3B, EIF3B, EIF4H, EIF5A, EIF5A2, EIF5AL1, EPRS1, GCLC, GGCT, GLUL, GSS, HARS1, KARS1, LARS1, PABPC1, RACK1, RPL10A, RPS27A, RPSA, TARS1, TP53I3, UBA52]
GO:0043039	tRNA aminoacylation	GO_BiologicalProcess-EBI-UniProt-GOA_17.02.2020_00h00	1.10409e-05	0.00772863	8.50193e-23	2.55058e-21	[5, 6, 8, 9]	Group29	14.0625	9	[AARS1, CARS1, DTD1, EPRS1, GLUL, HARS1, KARS1, LARS1, TARS1]
GO:0006418	tRNA aminoacylation for protein translation	GO_BiologicalProcess-EBI-UniProt-GOA_17.02.2020_00h00	7.37153e-06	0.00529276	8.50193e-23	2.55058e-21	[6, 7, 8, 9, 10]	Group29	14.7541	9	[AARS1, CARS1, DTD1, EPRS1, GLUL, HARS1, KARS1, LARS1, TARS1]
GO:0045321	leukocyte activation	GO_BiologicalProcess-EBI-UniProt-GOA_17.02.2020_00h00	1.96325e-12	1.60987e-09	1.99435e-10	3.39039e-09	[2, 3]	Group30	5.5601	68	[AIFM2, ALAD, ALDH9A1, ANXA3, AP2A2, APEH, ARPC5, ARSA, ASAH1, CAPN1, CAT, CD81, COTL1, CPOX, CSTB, CTSA, CTSB, CTSC, CTSD, CTSH, DPP7, DYNC1H1, DYNLL1, DYNLT1, ERP44, FKBP1A, FUCA1, GAA, GALNS, GCLC, GDI2, GGH, GLB1, GNS, HEXB, HLA-A, IL18, IQGAP1, KARS1, LTA4H, MGST1, MLEC, MYH9, NEU1, NIT2, NME2, NPC2, PDXK, PGM2, PRCP, PRDX5, PRKDC, PSMB1, PSMB5, PSMD12, PSMD6, PYGB, RAB5C, RAP1B, RNASET2, RP…
GO:0002263	cell activation involved in immune response	GO_BiologicalProcess-EBI-UniProt-GOA_17.02.2020_00h00	8.73654e-17	7.31248e-14	1.99435e-10	3.39039e-09	[3]	Group30	7.38499	61	[AIFM2, ALAD, ALDH9A1, ANXA3, AP2A2, APEH, ARPC5, ARSA, ASAH1, CAPN1, CAT, COTL1, CPOX, CSTB, CTSA, CTSB, CTSC, CTSD, CTSH, DPP7, DYNC1H1, DYNLL1, DYNLT1, ERP44, FUCA1, GAA, GALNS, GCLC, GDI2, GGH, GLB1, GNS, HEXB, IQGAP1, KARS1, LTA4H, MGST1, MLEC, NEU1, NIT2, NME2, NPC2, PDXK, PGM2, PRCP, PRDX5, PSMB1, PSMD12, PSMD6, PYGB, RAB5C, RAP1B, RNASET2, RPSA, S100A13, S100P, SERPINA1, SERPINB1, VCP, XR…
GO:0002443	leukocyte mediated immunity	GO_BiologicalProcess-EBI-UniProt-GOA_17.02.2020_00h00	2.5808e-16	2.15497e-13	1.99435e-10	3.39039e-09	[3]	Group30	6.79712	66	[AIFM2, AKR1C1, ALAD, ALDH9A1, ANXA3, AP2A2, APEH, ARPC5, ARSA, ASAH1, CAPN1, CAT, CD81, COTL1, CPOX, CSTB, CTSA, CTSB, CTSC, CTSD, CTSH, DPP7, DYNC1H1, DYNLL1, DYNLT1, ERP44, FUCA1, GAA, GALNS, GCLC, GDI2, GGH, GLB1, GNS, HEXB, HLA-A, IL18, IQGAP1, LTA4H, MGST1, MLEC, NEU1, NIT2, NME2, NPC2, PDXK, PGM2, PRCP, PRDX5, PSMB1, PSMD12, PSMD6, PYGB, RAB5C, RAP1B, RNASET2, RPSA, S100A13, S100P, SERPINA…
GO:0140352	export from cell	GO_BiologicalProcess-EBI-UniProt-GOA_17.02.2020_00h00	9.68944e-18	8.14882e-15	1.99435e-10	3.39039e-09	[2, 4]	Group30	6.12546	83	[ABCB1, AIFM2, ALAD, ALDH9A1, ANXA3, AP2A2, APEH, APEX1, APOA1, ARPC5, ARSA, ASAH1, BANF1, CAPN1, CAT, COTL1, CPOX, CSTB, CTSA, CTSB, CTSC, CTSD, CTSH, DPP7, DYNC1H1, DYNLL1, DYNLT1, ERP29, ERP44, FGG, FLNA, FN1, FUCA1, GAA, GALNS, GCLC, GDI2, GGH, GLB1, GNS, HEXB, IQGAP1, ISG15, LGALS3BP, LTA4H, M6PR, MANF, MGST1, MLEC, MYH10, MYH9, NEU1, NIT2, NME2, NPC2, PAFAH1B1, PDIA4, PDXK, PDZK1, PGM2, PPT…
GO:0002274	myeloid leukocyte activation	GO_BiologicalProcess-EBI-UniProt-GOA_17.02.2020_00h00	1.67919e-18	1.41892e-15	1.99435e-10	3.39039e-09	[3, 4]	Group30	7.90816	62	[AIFM2, ALAD, ALDH9A1, ANXA3, AP2A2, APEH, ARPC5, ARSA, ASAH1, CAPN1, CAT, COTL1, CPOX, CSTB, CTSA, CTSB, CTSC, CTSD, CTSH, DPP7, DYNC1H1, DYNLL1, DYNLT1, ERP44, FUCA1, GAA, GALNS, GCLC, GDI2, GGH, GLB1, GNS, HEXB, IL18, IQGAP1, KARS1, LTA4H, MGST1, MLEC, NEU1, NIT2, NME2, NPC2, PDXK, PGM2, PRCP, PRDX5, PSMB1, PSMD12, PSMD6, PYGB, RAB5C, RAP1B, RNASET2, RPSA, S100A13, S100P, SERPINA1, SERPINB1, V…
GO:0002366	leukocyte activation involved in immune response	GO_BiologicalProcess-EBI-UniProt-GOA_17.02.2020_00h00	5.51033e-17	4.61765e-14	1.99435e-10	3.39039e-09	[3, 4]	Group30	7.45721	61	[AIFM2, ALAD, ALDH9A1, ANXA3, AP2A2, APEH, ARPC5, ARSA, ASAH1, CAPN1, CAT, COTL1, CPOX, CSTB, CTSA, CTSB, CTSC, CTSD, CTSH, DPP7, DYNC1H1, DYNLL1, DYNLT1, ERP44, FUCA1, GAA, GALNS, GCLC, GDI2, GGH, GLB1, GNS, HEXB, IQGAP1, KARS1, LTA4H, MGST1, MLEC, NEU1, NIT2, NME2, NPC2, PDXK, PGM2, PRCP, PRDX5, PSMB1, PSMD12, PSMD6, PYGB, RAB5C, RAP1B, RNASET2, RPSA, S100A13, S100P, SERPINA1, SERPINB1, VCP, XR…
GO:0002444	myeloid leukocyte mediated immunity	GO_BiologicalProcess-EBI-UniProt-GOA_17.02.2020_00h00	2.03979e-20	1.73994e-17	1.99435e-10	3.39039e-09	[4]	Group30	8.76437	61	[AIFM2, ALAD, ALDH9A1, ANXA3, AP2A2, APEH, ARPC5, ARSA, ASAH1, CAPN1, CAT, COTL1, CPOX, CSTB, CTSA, CTSB, CTSC, CTSD, CTSH, DPP7, DYNC1H1, DYNLL1, DYNLT1, ERP44, FUCA1, GAA, GALNS, GCLC, GDI2, GGH, GLB1, GNS, HEXB, IQGAP1, LTA4H, MGST1, MLEC, NEU1, NIT2, NME2, NPC2, PDXK, PGM2, PRCP, PRDX5, PSMB1, PSMD12, PSMD6, PYGB, RAB5C, RAP1B, RNASET2, RPSA, S100A13, S100P, SERPINA1, SERPINB1, VCP, WDR1, XRC…
GO:0016192	vesicle-mediated transport	GO_BiologicalProcess-EBI-UniProt-GOA_17.02.2020_00h00	1.78121e-12	1.46237e-09	1.99435e-10	3.39039e-09	[4]	Group30	4.42553	104	[ACTR1A, ACTR3, AIFM2, ALAD, ALDH9A1, ANXA3, ANXA8, ANXA8L1, AP1B1, AP2A2, APEH, APEX1, APOA1, APOE, ARCN1, ARPC4, ARPC4-TTLL3, ARPC5, ARSA, ASAH1, CALR, CAPN1, CAT, CD81, CLTC, COPA, COPE, COTL1, CPOX, CSTB, CTSA, CTSB, CTSC, CTSD, CTSH, DPP7, DYNC1H1, DYNLL1, DYNLL2, DYNLT1, EEA1, ERP44, FGG, FLNA, FN1, FUCA1, GAA, GALNS, GCLC, GDI2, GGH, GLB1, GNS, GRB2, HARS1, HEXB, IQGAP1, LGALS3BP, LTA4H, M…
GO:0032940	secretion by cell	GO_BiologicalProcess-EBI-UniProt-GOA_17.02.2020_00h00	2.314e-17	1.94376e-14	1.99435e-10	3.39039e-09	[3, 5]	Group30	6.19195	80	[AIFM2, ALAD, ALDH9A1, ANXA3, AP2A2, APEH, APEX1, APOA1, ARPC5, ARSA, ASAH1, CAPN1, CAT, COTL1, CPOX, CSTB, CTSA, CTSB, CTSC, CTSD, CTSH, DPP7, DYNC1H1, DYNLL1, DYNLT1, ERP29, ERP44, FGG, FLNA, FN1, FUCA1, GAA, GALNS, GCLC, GDI2, GGH, GLB1, GNS, HEXB, IQGAP1, ISG15, LGALS3BP, LTA4H, M6PR, MANF, MGST1, MLEC, MYH10, MYH9, NEU1, NIT2, NME2, NPC2, PAFAH1B1, PDIA4, PDXK, PGM2, PPT1, PRCP, PRDX5, PSMB1…
GO:0046903	secretion	GO_BiologicalProcess-EBI-UniProt-GOA_17.02.2020_00h00	2.30668e-16	1.92838e-13	1.99435e-10	3.39039e-09	[4]	Group30	5.76132	84	[AIFM2, ALAD, ALDH9A1, ANXA3, AP2A2, APEH, APEX1, APOA1, ARPC5, ARSA, ASAH1, CAD, CAPN1, CAT, COPA, COTL1, CPOX, CSTB, CTSA, CTSB, CTSC, CTSD, CTSH, DPP7, DYNC1H1, DYNLL1, DYNLT1, ERP29, ERP44, FGG, FLNA, FN1, FUCA1, GAA, GALNS, GCLC, GDI2, GGH, GLB1, GNS, HEXB, IQGAP1, ISG15, LGALS3BP, LTA4H, M6PR, MANF, MGST1, MLEC, MYH10, MYH9, NEU1, NIT2, NME2, NPC2, PAFAH1B1, PDIA4, PDXK, PEBP1, PGM2, PPT1, …
GO:0002275	myeloid cell activation involved in immune response	GO_BiologicalProcess-EBI-UniProt-GOA_17.02.2020_00h00	2.3566e-20	2.00782e-17	1.99435e-10	3.39039e-09	[4, 5]	Group30	8.73925	61	[AIFM2, ALAD, ALDH9A1, ANXA3, AP2A2, APEH, ARPC5, ARSA, ASAH1, CAPN1, CAT, COTL1, CPOX, CSTB, CTSA, CTSB, CTSC, CTSD, CTSH, DPP7, DYNC1H1, DYNLL1, DYNLT1, ERP44, FUCA1, GAA, GALNS, GCLC, GDI2, GGH, GLB1, GNS, HEXB, IQGAP1, KARS1, LTA4H, MGST1, MLEC, NEU1, NIT2, NME2, NPC2, PDXK, PGM2, PRCP, PRDX5, PSMB1, PSMD12, PSMD6, PYGB, RAB5C, RAP1B, RNASET2, RPSA, S100A13, S100P, SERPINA1, SERPINB1, VCP, XR…
GO:0036230	granulocyte activation	GO_BiologicalProcess-EBI-UniProt-GOA_17.02.2020_00h00	4.32912e-21	3.71006e-18	1.99435e-10	3.39039e-09	[4, 5]	Group30	9.03704	61	[AIFM2, ALAD, ALDH9A1, ANXA3, AP2A2, APEH, ARPC5, ARSA, ASAH1, CAPN1, CAT, COTL1, CPOX, CSTB, CTSA, CTSB, CTSC, CTSD, CTSH, DPP7, DYNC1H1, DYNLL1, DYNLT1, ERP44, FUCA1, GAA, GALNS, GCLC, GDI2, GGH, GLB1, GNS, HEXB, IL18, IQGAP1, KARS1, LTA4H, MGST1, MLEC, NEU1, NIT2, NME2, NPC2, PDXK, PGM2, PRCP, PRDX5, PSMB1, PSMD12, PSMD6, PYGB, RAB5C, RAP1B, RNASET2, RPSA, S100P, SERPINA1, SERPINB1, VCP, XRCC5…
GO:0002446	neutrophil mediated immunity	GO_BiologicalProcess-EBI-UniProt-GOA_17.02.2020_00h00	1.10686e-20	9.47474e-18	1.99435e-10	3.39039e-09	[5]	Group30	9.00901	60	[AIFM2, ALAD, ALDH9A1, ANXA3, AP2A2, APEH, ARPC5, ARSA, ASAH1, CAPN1, CAT, COTL1, CPOX, CSTB, CTSA, CTSB, CTSC, CTSD, CTSH, DPP7, DYNC1H1, DYNLL1, DYNLT1, ERP44, FUCA1, GAA, GALNS, GCLC, GDI2, GGH, GLB1, GNS, HEXB, IQGAP1, LTA4H, MGST1, MLEC, NEU1, NIT2, NME2, NPC2, PDXK, PGM2, PRCP, PRDX5, PSMB1, PSMD12, PSMD6, PYGB, RAB5C, RAP1B, RNASET2, RPSA, S100P, SERPINA1, SERPINB1, VCP, WDR1, XRCC5, XRCC6]
GO:0006887	exocytosis	GO_BiologicalProcess-EBI-UniProt-GOA_17.02.2020_00h00	2.84789e-19	2.41501e-16	1.99435e-10	3.39039e-09	[4, 5, 6]	Group30	7.15686	73	[AIFM2, ALAD, ALDH9A1, ANXA3, AP2A2, APEH, APEX1, APOA1, ARPC5, ARSA, ASAH1, CAPN1, CAT, COTL1, CPOX, CSTB, CTSA, CTSB, CTSC, CTSD, CTSH, DPP7, DYNC1H1, DYNLL1, DYNLT1, ERP44, FGG, FLNA, FN1, FUCA1, GAA, GALNS, GCLC, GDI2, GGH, GLB1, GNS, HEXB, IQGAP1, LGALS3BP, LTA4H, MANF, MGST1, MLEC, MYH10, MYH9, NEU1, NIT2, NME2, NPC2, PDXK, PGM2, PRCP, PRDX5, PSMB1, PSMD12, PSMD6, PYGB, RAB5C, RAP1B, RNASET…
GO:0042119	neutrophil activation	GO_BiologicalProcess-EBI-UniProt-GOA_17.02.2020_00h00	1.49224e-20	1.27586e-17	1.99435e-10	3.39039e-09	[5, 6]	Group30	8.95522	60	[AIFM2, ALAD, ALDH9A1, ANXA3, AP2A2, APEH, ARPC5, ARSA, ASAH1, CAPN1, CAT, COTL1, CPOX, CSTB, CTSA, CTSB, CTSC, CTSD, CTSH, DPP7, DYNC1H1, DYNLL1, DYNLT1, ERP44, FUCA1, GAA, GALNS, GCLC, GDI2, GGH, GLB1, GNS, HEXB, IL18, IQGAP1, LTA4H, MGST1, MLEC, NEU1, NIT2, NME2, NPC2, PDXK, PGM2, PRCP, PRDX5, PSMB1, PSMD12, PSMD6, PYGB, RAB5C, RAP1B, RNASET2, RPSA, S100P, SERPINA1, SERPINB1, VCP, XRCC5, XRCC6]
GO:0002283	neutrophil activation involved in immune response	GO_BiologicalProcess-EBI-UniProt-GOA_17.02.2020_00h00	2.61973e-20	2.22939e-17	1.99435e-10	3.39039e-09	[5, 6, 7]	Group30	8.9939	59	[AIFM2, ALAD, ALDH9A1, ANXA3, AP2A2, APEH, ARPC5, ARSA, ASAH1, CAPN1, CAT, COTL1, CPOX, CSTB, CTSA, CTSB, CTSC, CTSD, CTSH, DPP7, DYNC1H1, DYNLL1, DYNLT1, ERP44, FUCA1, GAA, GALNS, GCLC, GDI2, GGH, GLB1, GNS, HEXB, IQGAP1, LTA4H, MGST1, MLEC, NEU1, NIT2, NME2, NPC2, PDXK, PGM2, PRCP, PRDX5, PSMB1, PSMD12, PSMD6, PYGB, RAB5C, RAP1B, RNASET2, RPSA, S100P, SERPINA1, SERPINB1, VCP, XRCC5, XRCC6]
GO:0043299	leukocyte degranulation	GO_BiologicalProcess-EBI-UniProt-GOA_17.02.2020_00h00	3.87696e-20	3.29542e-17	1.99435e-10	3.39039e-09	[3, 6, 7, 8]	Group30	8.78477	60	[AIFM2, ALAD, ALDH9A1, ANXA3, AP2A2, APEH, ARPC5, ARSA, ASAH1, CAPN1, CAT, COTL1, CPOX, CSTB, CTSA, CTSB, CTSC, CTSD, CTSH, DPP7, DYNC1H1, DYNLL1, DYNLT1, ERP44, FUCA1, GAA, GALNS, GCLC, GDI2, GGH, GLB1, GNS, HEXB, IQGAP1, LTA4H, MGST1, MLEC, NEU1, NIT2, NME2, NPC2, PDXK, PGM2, PRCP, PRDX5, PSMB1, PSMD12, PSMD6, PYGB, RAB5C, RAP1B, RNASET2, RPSA, S100A13, S100P, SERPINA1, SERPINB1, VCP, XRCC5, XR…
GO:0045055	regulated exocytosis	GO_BiologicalProcess-EBI-UniProt-GOA_17.02.2020_00h00	7.0335e-20	5.97144e-17	1.99435e-10	3.39039e-09	[5, 6, 7]	Group30	7.59219	70	[AIFM2, ALAD, ALDH9A1, ANXA3, AP2A2, APEH, APOA1, ARPC5, ARSA, ASAH1, CAPN1, CAT, COTL1, CPOX, CSTB, CTSA, CTSB, CTSC, CTSD, CTSH, DPP7, DYNC1H1, DYNLL1, DYNLT1, ERP44, FGG, FLNA, FN1, FUCA1, GAA, GALNS, GCLC, GDI2, GGH, GLB1, GNS, HEXB, IQGAP1, LGALS3BP, LTA4H, MANF, MGST1, MLEC, MYH9, NEU1, NIT2, NME2, NPC2, PDXK, PGM2, PRCP, PRDX5, PSMB1, PSMD12, PSMD6, PYGB, RAB5C, RAP1B, RNASET2, RPSA, S100A…
GO:0043312	neutrophil degranulation	GO_BiologicalProcess-EBI-UniProt-GOA_17.02.2020_00h00	1.9401e-20	1.65685e-17	1.99435e-10	3.39039e-09	[4, 6, 7, 8, 9]	Group30	9.04908	59	[AIFM2, ALAD, ALDH9A1, ANXA3, AP2A2, APEH, ARPC5, ARSA, ASAH1, CAPN1, CAT, COTL1, CPOX, CSTB, CTSA, CTSB, CTSC, CTSD, CTSH, DPP7, DYNC1H1, DYNLL1, DYNLT1, ERP44, FUCA1, GAA, GALNS, GCLC, GDI2, GGH, GLB1, GNS, HEXB, IQGAP1, LTA4H, MGST1, MLEC, NEU1, NIT2, NME2, NPC2, PDXK, PGM2, PRCP, PRDX5, PSMB1, PSMD12, PSMD6, PYGB, RAB5C, RAP1B, RNASET2, RPSA, S100P, SERPINA1, SERPINB1, VCP, XRCC5, XRCC6]
GO:0006081	cellular aldehyde metabolic process	GO_BiologicalProcess-EBI-UniProt-GOA_17.02.2020_00h00	5.22699e-12	4.27568e-09	2.00224e-24	6.20695e-23	[3]	Group31	21.6216	16	[ADH4, ADH5, AKR1A1, AKR1C1, AKR1C3, AKR7A2, ALDH3A2, ALDH4A1, ALDH9A1, GRHPR, IDH2, PDXK, PNPO, PRDX5, TALDO1, TKFC]
GO:0016491	oxidoreductase activity	GO_BiologicalProcess-EBI-UniProt-GOA_17.02.2020_00h00	1.51117e-14	1.25427e-11	2.00224e-24	6.20695e-23	[3]	Group31	6.76606	59	[ACADM, ACADVL, ADH4, ADH5, AIFM2, AKR1A1, AKR1C1, AKR1C3, AKR7A2, ALDH2, ALDH3A2, ALDH4A1, ALDH9A1, APEX1, ARSA, BDH2, BLVRB, CAT, COX7A2, CPOX, CRYZ, CYB5A, DECR1, DHCR24, FASN, G6PD, GLDC, GLRX5, GRHPR, GSR, HAAO, HGD, HMOX1, HSD17B10, IDH2, IVD, MAT2B, MDH1, ME1, ME2, MGST1, NDUFA4, PCBD1, PCYOX1, PDIA4, PGD, PNPO, PRDX5, QDPR, SDHB, SELENBP1, SORD, TP53I3, TSTA3, TXN, TXNDC17, TXNL1, TXNRD2,…
GO:0017144	drug metabolic process	GO_BiologicalProcess-EBI-UniProt-GOA_17.02.2020_00h00	2.32663e-11	1.89621e-08	2.00224e-24	6.20695e-23	[3]	Group31	6.79758	45	[ACO1, ACO2, ACSL1, ACSS1, ADH4, ADH5, ADK, AFP, AKR1A1, AKR1C1, AKR1C3, AKR7A2, ALDH2, ALDH3A2, ALDH9A1, ATP5ME, BDH2, CAD, CAT, CTSB, CTSH, FAH, GLDC, HAAO, HGD, IDE, MAT2A, MAT2B, NPEPPS, OAT, PAFAH1B1, PCBD1, PCCB, PDXK, PNPO, PRDX5, PRMT1, QDPR, SDHB, SHMT1, SHMT2, SLC19A3, SORD, UGGT1, YWHAE]
GO:0042445	hormone metabolic process	GO_BiologicalProcess-EBI-UniProt-GOA_17.02.2020_00h00	6.50587e-05	0.0417026	2.00224e-24	6.20695e-23	[2, 4]	Group31	6.36042	18	[ADH4, AFP, AKR1A1, AKR1C1, AKR1C3, ALDH4A1, ALDH9A1, APOA1, CPQ, CTSB, CTSH, IDE, PEBP1, PTPN11, RBP4, SCRN1, SUB1, UGGT1]
GO:1901615	organic hydroxy compound metabolic process	GO_BiologicalProcess-EBI-UniProt-GOA_17.02.2020_00h00	1.46805e-10	1.18912e-07	2.00224e-24	6.20695e-23	[3]	Group31	6.74157	42	[ACAA2, ACO2, ACSS1, ADH4, ADH5, AKR1A1, AKR1C1, AKR1C3, AKR7A2, ALDH2, ALDH3A2, ALDH9A1, APOA1, APOE, ASAH1, CAT, CPQ, CTSB, CTSH, DDT, DDTL, DHCR24, FAH, G6PD, GLB1, IDH2, MTPN, MYOF, NPC2, NPEPPS, PCBD1, PDXK, PEBP1, PNPO, PRDX5, QDPR, RBP4, SCRN1, SORD, TKFC, TPP1, VPS29]
GO:0006066	alcohol metabolic process	GO_BiologicalProcess-EBI-UniProt-GOA_17.02.2020_00h00	1.28395e-07	9.97631e-05	2.00224e-24	6.20695e-23	[3, 4]	Group31	6.71296	29	[ACAA2, ACO2, ACSS1, ADH4, ADH5, AKR1A1, AKR1C1, AKR1C3, AKR7A2, ALDH2, ALDH3A2, ALDH9A1, APOA1, APOE, ASAH1, CAT, DHCR24, G6PD, GLB1, IDH2, MYOF, NPC2, PCBD1, QDPR, RBP4, SCRN1, SORD, TKFC, VPS29]
GO:0006575	cellular modified amino acid metabolic process	GO_BiologicalProcess-EBI-UniProt-GOA_17.02.2020_00h00	1.11597e-07	8.7046e-05	2.00224e-24	6.20695e-23	[3, 4]	Group31	8.67769	21	[ACADM, ALDH4A1, ALDH9A1, ATIC, CNDP2, CPQ, CTSB, CTSH, G6PD, GCLC, GGCT, GGH, GSR, GSS, GSTM3, MGST1, PCYOX1, PEBP1, PRMT1, SHMT1, SHMT2]
GO:0016614	oxidoreductase activity, acting on CH-OH group of donors	GO_BiologicalProcess-EBI-UniProt-GOA_17.02.2020_00h00	2.27834e-09	1.82723e-06	2.00224e-24	6.20695e-23	[4]	Group31	12.0253	19	[ADH4, ADH5, AKR1A1, AKR1C1, AKR1C3, AKR7A2, ALDH3A2, BDH2, FASN, G6PD, GRHPR, HSD17B10, IDH2, MDH1, ME1, ME2, PGD, SORD, TSTA3]
GO:0016903	oxidoreductase activity, acting on the aldehyde or oxo group of donors	GO_BiologicalProcess-EBI-UniProt-GOA_17.02.2020_00h00	1.57235e-06	0.00118241	2.00224e-24	6.20695e-23	[4]	Group31	17.6471	9	[ADH4, ADH5, AKR1A1, AKR1C1, AKR1C3, ALDH2, ALDH3A2, ALDH4A1, ALDH9A1]
GO:0016999	antibiotic metabolic process	GO_BiologicalProcess-EBI-UniProt-GOA_17.02.2020_00h00	5.91244e-06	0.00428652	2.00224e-24	6.20695e-23	[4]	Group31	9.39597	14	[ACO1, ACO2, ACSS1, ADH4, ADH5, AKR1A1, AKR1C1, AKR1C3, AKR7A2, ALDH2, ALDH9A1, CAT, PRDX5, UGGT1]
GO:1901616	organic hydroxy compound catabolic process	GO_BiologicalProcess-EBI-UniProt-GOA_17.02.2020_00h00	6.30217e-05	0.0405229	2.00224e-24	6.20695e-23	[4]	Group31	10.2041	10	[ADH4, AKR1C1, AKR1C3, ALDH2, ALDH9A1, APOE, FAH, PRDX5, SORD, TKFC]
GO:0034308	primary alcohol metabolic process	GO_BiologicalProcess-EBI-UniProt-GOA_17.02.2020_00h00	2.54153e-05	0.0171299	2.00224e-24	6.20695e-23	[4, 5]	Group31	10.2804	11	[ACSS1, ADH4, ADH5, AKR1A1, AKR1C1, AKR1C3, AKR7A2, ALDH2, ALDH3A2, ALDH9A1, RBP4]
GO:0016137	glycoside metabolic process	GO_BiologicalProcess-EBI-UniProt-GOA_17.02.2020_00h00	3.51552e-05	0.0233431	2.00224e-24	6.20695e-23	[5]	Group31	20.6897	6	[AKR1A1, AKR1C1, AKR1C3, AKR7A2, FUCA1, NAGA]
GO:0016616	oxidoreductase activity, acting on the CH-OH group of donors, NAD or NADP as acceptor	GO_BiologicalProcess-EBI-UniProt-GOA_17.02.2020_00h00	6.2522e-09	4.96425e-06	2.00224e-24	6.20695e-23	[5]	Group31	12	18	[ADH4, ADH5, AKR1A1, AKR1C1, AKR1C3, AKR7A2, BDH2, FASN, G6PD, GRHPR, HSD17B10, IDH2, MDH1, ME1, ME2, PGD, SORD, TSTA3]
GO:0016620	oxidoreductase activity, acting on the aldehyde or oxo group of donors, NAD or NADP as acceptor	GO_BiologicalProcess-EBI-UniProt-GOA_17.02.2020_00h00	5.15067e-07	0.000394026	2.00224e-24	6.20695e-23	[5]	Group31	20	9	[ADH4, ADH5, AKR1A1, AKR1C1, AKR1C3, ALDH2, ALDH3A2, ALDH4A1, ALDH9A1]
GO:0042398	cellular modified amino acid biosynthetic process	GO_BiologicalProcess-EBI-UniProt-GOA_17.02.2020_00h00	6.40785e-06	0.00463287	2.00224e-24	6.20695e-23	[5]	Group31	15	9	[ACADM, ALDH4A1, ALDH9A1, ATIC, CNDP2, GCLC, GGCT, GSS, SHMT1]
GO:0006578	amino-acid betaine biosynthetic process	GO_BiologicalProcess-EBI-UniProt-GOA_17.02.2020_00h00	2.73973e-05	0.0183562	2.00224e-24	6.20695e-23	[5, 6]	Group31	44.4444	4	[ACADM, ALDH4A1, ALDH9A1, SHMT1]
GO:0004030	aldehyde dehydrogenase [NAD(P)+] activity	GO_BiologicalProcess-EBI-UniProt-GOA_17.02.2020_00h00	1.68906e-06	0.00126341	2.00224e-24	6.20695e-23	[6]	Group31	33.3333	6	[ADH4, ADH5, ALDH2, ALDH3A2, ALDH4A1, ALDH9A1]
GO:0032787	monocarboxylic acid metabolic process	GO_BiologicalProcess-EBI-UniProt-GOA_17.02.2020_00h00	4.29312e-09	3.42591e-06	2.00224e-24	6.20695e-23	[6]	Group31	6.1194	41	[ABAT, ACAA2, ACADM, ACADVL, ACOT1, ACOT2, ACSL1, ACSS1, ADH4, ADH5, AKR1A1, AKR1C1, AKR1C3, ALDH3A2, ALDH4A1, ALDH9A1, ARSA, BDH2, CAT, DECR1, FABP3, FAH, FASN, GRHPR, HAAO, HSD17B10, IDH2, IVD, LTA4H, ME1, ME2, NIT2, PCCB, PGD, PRDX5, PTGES3, SCRN1, SDHB, SORD, UGGT1, UGT2A1]
GO:0043878	glyceraldehyde-3-phosphate dehydrogenase (NAD+) (non-phosphorylating) activity	GO_BiologicalProcess-EBI-UniProt-GOA_17.02.2020_00h00	6.1015e-07	0.000465545	2.00224e-24	6.20695e-23	[6]	Group31	55.5556	5	[ADH5, ALDH2, ALDH3A2, ALDH4A1, ALDH9A1]
GO:0045329	carnitine biosynthetic process	GO_BiologicalProcess-EBI-UniProt-GOA_17.02.2020_00h00	7.88405e-06	0.0056371	2.00224e-24	6.20695e-23	[5, 6, 7]	Group31	57.1429	4	[ACADM, ALDH4A1, ALDH9A1, SHMT1]
GO:0035410	dihydrotestosterone 17-beta-dehydrogenase activity	GO_BiologicalProcess-EBI-UniProt-GOA_17.02.2020_00h00	4.24842e-05	0.0280396	2.00224e-24	6.20695e-23	[6, 7]	Group31	75	3	[AKR1C1, AKR1C3, HSD17B10]
GO:0004029	aldehyde dehydrogenase (NAD+) activity	GO_BiologicalProcess-EBI-UniProt-GOA_17.02.2020_00h00	1.86028e-05	0.0126685	2.00224e-24	6.20695e-23	[7]	Group31	31.25	5	[ADH5, ALDH2, ALDH3A2, ALDH4A1, ALDH9A1]
GO:0004032	alditol:NADP+ 1-oxidoreductase activity	GO_BiologicalProcess-EBI-UniProt-GOA_17.02.2020_00h00	1.86028e-05	0.0126685	2.00224e-24	6.20695e-23	[8]	Group31	31.25	5	[ADH4, AKR1A1, AKR1C1, AKR1C3, AKR7A2]
GO:0033554	cellular response to stress	GO_BiologicalProcess-EBI-UniProt-GOA_17.02.2020_00h00	4.81398e-09	3.83193e-06	3.75255e-15	8.25561e-14	[3]	Group32	4.1261	89	[ACAA2, ACADVL, ACTL6A, AKR1A1, AKR1C1, AKR1C3, ALDH9A1, APEX1, APOA1, APOD, ARMT1, ARSA, CALR, CAT, COPS6, DDB1, DDX1, DNAJB12, DNPEP, ELOC, ERP44, EXOSC7, FASN, FSCN1, G6PD, GLUL, GRB2, GSR, GSTM3, H2AW, H4C1, HMOX1, HNRNPA1, IGFBP7, ISG15, LARS1, LIG3, MCM2, MCM5, MGST1, MRE11, MYDGF, MYOF, NME2, NPEPPS, PCNA, PCYOX1, PDIA4, PEBP1, POLR2A, POLR2B, PRDX5, PRKDC, PRMT1, PRPF19, PSMA1, PSMA6, PSM…
GO:0043933	protein-containing complex subunit organization	GO_BiologicalProcess-EBI-UniProt-GOA_17.02.2020_00h00	1.56855e-12	1.28935e-09	3.75255e-15	8.25561e-14	[3]	Group32	4.74453	91	[ADAR, AKR1A1, AKR1C1, ALAD, ALDH4A1, ALDH9A1, APEH, APOA1, APOC3, APOE, ARPC4, ARPC4-TTLL3, CALR, CENPF, CLTC, COX7A2, CPSF6, CRYZ, CTSC, DDB1, DDX1, DNAJB12, DSTN, EIF2S3, EIF2S3B, EIF3B, ELAVL1, EPRS1, FASN, FGG, FKBP1A, FKBP4, FN1, GLDC, GLUL, H2AW, H2BC17, H2BC21, H2BC3, H2BU1, H4C1, HARS1, HDAC1, HSD17B10, LAP3, LEO1, MAT2A, MCM2, MCM5, NUDT21, NUP210, PAFAH1B1, PEBP1, PRMT1, PRMT5, PRPF19,…
GO:0042769	DNA damage response, detection of DNA damage	GO_BiologicalProcess-EBI-UniProt-GOA_17.02.2020_00h00	1.10364e-05	0.0077365	3.75255e-15	8.25561e-14	[3, 5]	Group32	16.3265	8	[DDB1, PCNA, RPA1, RPA3, RPS27A, UBA52, UBB, UBC]
GO:0051276	chromosome organization	GO_BiologicalProcess-EBI-UniProt-GOA_17.02.2020_00h00	1.15038e-05	0.00804118	3.75255e-15	8.25561e-14	[4]	Group32	4.08012	55	[ACTL6A, AKR1A1, APEH, APEX1, BANF1, CAD, CENPF, COPS6, DDB1, DDX1, EXOSC7, GTF2I, H2AC4, H2AC6, H2AW, H2AZ1, H2AZ2, H2BC17, H2BC21, H2BC3, H2BU1, H4C1, HDAC1, IGFBP7, LEO1, MANF, MCM2, MCM5, MRE11, NUDT5, PCNA, PCYOX1, PRKDC, PRMT1, PRMT5, PTGES3, RBBP4, RECQL, RPA1, RPA3, RPS27A, SET, SETSIP, SMARCA5, SUPT16H, TBL1XR1, TPP1, TXN, UBA52, UBB, UBC, UPF1, WDR61, XRCC5, XRCC6]
GO:0065003	protein-containing complex assembly	GO_BiologicalProcess-EBI-UniProt-GOA_17.02.2020_00h00	2.35975e-13	1.94679e-10	3.75255e-15	8.25561e-14	[4]	Group32	5.10638	84	[ADAR, AKR1A1, AKR1C1, ALAD, ALDH4A1, ALDH9A1, APOA1, APOC3, APOE, ARPC4, ARPC4-TTLL3, CALR, CENPF, CLTC, COX7A2, CPSF6, CRYZ, CTSC, DDB1, DDX1, DNAJB12, EIF2S3, EIF2S3B, EIF3B, ELAVL1, EPRS1, FASN, FGG, FKBP1A, FKBP4, FN1, GLDC, GLUL, H2BC17, H2BC21, H2BC3, H2BU1, H4C1, HARS1, HDAC1, HSD17B10, LAP3, LEO1, MAT2A, MCM2, MCM5, NUDT21, NUP210, PEBP1, PRMT1, PRMT5, PRPF19, PRPF8, PSMD10, PTGES3, RBBP…
GO:0071824	protein-DNA complex subunit organization	GO_BiologicalProcess-EBI-UniProt-GOA_17.02.2020_00h00	1.68811e-05	0.0115804	3.75255e-15	8.25561e-14	[4]	Group32	6.34441	21	[CENPF, DDB1, H2AW, H2BC17, H2BC21, H2BC3, H2BU1, H4C1, MCM2, MCM5, RBBP4, RPA1, RPA3, RPS27A, SET, SETSIP, SMARCA5, SUPT16H, UBA52, UBB, UBC]
GO:0071826	ribonucleoprotein complex subunit organization	GO_BiologicalProcess-EBI-UniProt-GOA_17.02.2020_00h00	5.24057e-06	0.00381513	3.75255e-15	8.25561e-14	[4]	Group32	7.36434	19	[ADAR, CPSF6, DDX1, EIF2S3, EIF2S3B, EIF3B, HARS1, NUDT21, PEBP1, PRMT5, PRPF19, PRPF8, PTGES3, RPSA, SNRNP200, SNRPD1, SNRPD3, STRAP, VCP]
GO:0022618	ribonucleoprotein complex assembly	GO_BiologicalProcess-EBI-UniProt-GOA_17.02.2020_00h00	1.33086e-05	0.0092495	3.75255e-15	8.25561e-14	[4, 5, 6]	Group32	7.17131	18	[ADAR, CPSF6, DDX1, EIF2S3, EIF2S3B, EIF3B, HARS1, NUDT21, PEBP1, PRMT5, PRPF19, PRPF8, PTGES3, RPSA, SNRNP200, SNRPD1, SNRPD3, STRAP]
GO:0034622	cellular protein-containing complex assembly	GO_BiologicalProcess-EBI-UniProt-GOA_17.02.2020_00h00	1.31962e-08	1.04382e-05	3.75255e-15	8.25561e-14	[5]	Group32	5.16385	52	[ADAR, ARPC4, ARPC4-TTLL3, CALR, CENPF, CLTC, COX7A2, CPSF6, DDB1, DDX1, DNAJB12, EIF2S3, EIF2S3B, EIF3B, FGG, FKBP1A, FKBP4, H2BC17, H2BC21, H2BC3, H2BU1, H4C1, HARS1, LAP3, MCM2, MCM5, NUDT21, PEBP1, PRMT5, PRPF19, PRPF8, PSMD10, PTGES3, RBBP4, RPA1, RPA3, RPS27A, RPSA, SET, SETSIP, SMARCA5, SNRNP200, SNRPD1, SNRPD3, ST13, STRAP, UBA52, UBB, UBC, UQCRB, YWHAB, YWHAQ]
GO:0071103	DNA conformation change	GO_BiologicalProcess-EBI-UniProt-GOA_17.02.2020_00h00	7.4144e-06	0.00531613	3.75255e-15	8.25561e-14	[5]	Group32	6.13811	24	[BANF1, CAD, DDB1, DDX1, H2BC17, H2BC21, H2BC3, H2BU1, H4C1, MCM2, MCM5, MRE11, RBBP4, RECQL, RPA1, RPS27A, SET, SETSIP, SMARCA5, UBA52, UBB, UBC, XRCC5, XRCC6]
GO:0065004	protein-DNA complex assembly	GO_BiologicalProcess-EBI-UniProt-GOA_17.02.2020_00h00	1.37276e-05	0.00952696	3.75255e-15	8.25561e-14	[5, 6]	Group32	6.88406	19	[CENPF, DDB1, H2BC17, H2BC21, H2BC3, H2BU1, H4C1, MCM2, MCM5, RBBP4, RPA1, RPA3, RPS27A, SET, SETSIP, SMARCA5, UBA52, UBB, UBC]
GO:0090305	nucleic acid phosphodiester bond hydrolysis	GO_BiologicalProcess-EBI-UniProt-GOA_17.02.2020_00h00	2.66589e-05	0.0179148	3.75255e-15	8.25561e-14	[5, 6]	Group32	5.97826	22	[APEX1, CAD, CPSF1, CPSF3, CPSF6, DDB1, DDX1, EXOSC7, FSCN1, LACTB2, MRE11, NUDT21, PCNA, RNASET2, RNH1, RPA1, RPA3, RPS27A, UBA52, UBB, UBC, XRN2]
GO:0006281	DNA repair	GO_BiologicalProcess-EBI-UniProt-GOA_17.02.2020_00h00	4.52638e-06	0.00329973	3.75255e-15	8.25561e-14	[5, 6, 7]	Group32	5.18293	34	[ACTL6A, APEX1, COPS6, DDB1, DDX1, EXOSC7, FSCN1, H2AW, H4C1, IGFBP7, ISG15, LIG3, MCM2, MCM5, MRE11, PCNA, PEBP1, POLR2A, POLR2B, PRKDC, PRPF19, RECQL, RPA1, RPA3, RPS27A, SSRP1, SUPT16H, UBA52, UBB, UBC, UPF1, VCP, XRCC5, XRCC6]
GO:0032392	DNA geometric change	GO_BiologicalProcess-EBI-UniProt-GOA_17.02.2020_00h00	2.80847e-05	0.0187606	3.75255e-15	8.25561e-14	[6]	Group32	8.72483	13	[DDB1, DDX1, MCM2, MCM5, MRE11, RECQL, RPA1, RPS27A, UBA52, UBB, UBC, XRCC5, XRCC6]
GO:0071897	DNA biosynthetic process	GO_BiologicalProcess-EBI-UniProt-GOA_17.02.2020_00h00	2.43333e-05	0.0164493	3.75255e-15	8.25561e-14	[5, 6, 7]	Group32	8.84354	13	[CENPF, ISG15, LIG3, MRE11, PCNA, PTGES3, RPA1, RPA3, RPS27A, UBA52, UBB, UBC, VCP]
GO:0000731	DNA synthesis involved in DNA repair	GO_BiologicalProcess-EBI-UniProt-GOA_17.02.2020_00h00	1.82732e-05	0.0124623	3.75255e-15	8.25561e-14	[6, 7, 8]	Group32	13.2353	9	[ISG15, PCNA, RPA1, RPA3, RPS27A, UBA52, UBB, UBC, VCP]
GO:0006289	nucleotide-excision repair	GO_BiologicalProcess-EBI-UniProt-GOA_17.02.2020_00h00	6.21414e-07	0.000473517	3.75255e-15	8.25561e-14	[6, 7, 8]	Group32	10.5634	15	[COPS6, DDB1, FSCN1, LIG3, PCNA, PEBP1, POLR2A, POLR2B, PRPF19, RPA1, RPA3, RPS27A, UBA52, UBB, UBC]
GO:0006297	nucleotide-excision repair, DNA gap filling	GO_BiologicalProcess-EBI-UniProt-GOA_17.02.2020_00h00	2.73597e-07	0.000210669	3.75255e-15	8.25561e-14	[5, 6, 7, 8, 9]	Group32	25.8065	8	[LIG3, PCNA, RPA1, RPA3, RPS27A, UBA52, UBB, UBC]
GO:0006301	postreplication repair	GO_BiologicalProcess-EBI-UniProt-GOA_17.02.2020_00h00	1.61669e-05	0.0111552	3.75255e-15	8.25561e-14	[6, 7, 8]	Group32	13.4328	9	[ISG15, PCNA, RPA1, RPA3, RPS27A, UBA52, UBB, UBC, VCP]
GO:0032508	DNA duplex unwinding	GO_BiologicalProcess-EBI-UniProt-GOA_17.02.2020_00h00	1.6807e-05	0.0115464	3.75255e-15	8.25561e-14	[7]	Group32	9.15493	13	[DDB1, DDX1, MCM2, MCM5, MRE11, RECQL, RPA1, RPS27A, UBA52, UBB, UBC, XRCC5, XRCC6]
GO:0000715	nucleotide-excision repair, DNA damage recognition	GO_BiologicalProcess-EBI-UniProt-GOA_17.02.2020_00h00	2.84091e-05	0.0189489	3.75255e-15	8.25561e-14	[5, 7, 8, 9]	Group32	21.4286	6	[COPS6, DDB1, RPS27A, UBA52, UBB, UBC]
GO:0006294	nucleotide-excision repair, preincision complex assembly	GO_BiologicalProcess-EBI-UniProt-GOA_17.02.2020_00h00	1.73563e-05	0.0118891	3.75255e-15	8.25561e-14	[6, 7, 8, 9]	Group32	18.4211	7	[DDB1, RPA1, RPA3, RPS27A, UBA52, UBB, UBC]
GO:0033683	nucleotide-excision repair, DNA incision	GO_BiologicalProcess-EBI-UniProt-GOA_17.02.2020_00h00	1.57235e-06	0.00118241	3.75255e-15	8.25561e-14	[6, 7, 8, 9]	Group32	17.6471	9	[DDB1, FSCN1, PCNA, RPA1, RPA3, RPS27A, UBA52, UBB, UBC]
GO:0006283	transcription-coupled nucleotide-excision repair	GO_BiologicalProcess-EBI-UniProt-GOA_17.02.2020_00h00	2.88994e-08	2.28016e-05	3.75255e-15	8.25561e-14	[7, 8, 9]	Group32	14.433	14	[COPS6, DDB1, LIG3, PCNA, PEBP1, POLR2A, POLR2B, PRPF19, RPA1, RPA3, RPS27A, UBA52, UBB, UBC]
GO:0019985	translesion synthesis	GO_BiologicalProcess-EBI-UniProt-GOA_17.02.2020_00h00	3.03894e-06	0.00223362	3.75255e-15	8.25561e-14	[7, 8, 9]	Group32	16.3636	9	[ISG15, PCNA, RPA1, RPA3, RPS27A, UBA52, UBB, UBC, VCP]
GO:0006296	nucleotide-excision repair, DNA incision, 5'-to lesion	GO_BiologicalProcess-EBI-UniProt-GOA_17.02.2020_00h00	6.76698e-06	0.004879	3.75255e-15	8.25561e-14	[7, 8, 9, 10]	Group32	17.3913	8	[DDB1, PCNA, RPA1, RPA3, RPS27A, UBA52, UBB, UBC]
GO:0042276	error-prone translesion synthesis	GO_BiologicalProcess-EBI-UniProt-GOA_17.02.2020_00h00	8.47584e-07	0.000643316	3.75255e-15	8.25561e-14	[8, 9, 10]	Group32	28	7	[PCNA, RPA1, RPA3, RPS27A, UBA52, UBB, UBC]
GO:0070987	error-free translesion synthesis	GO_BiologicalProcess-EBI-UniProt-GOA_17.02.2020_00h00	2.9223e-08	2.30277e-05	3.75255e-15	8.25561e-14	[8, 9, 10]	Group32	33.3333	8	[PCNA, RPA1, RPA3, RPS27A, UBA52, UBB, UBC, VCP]
GO:0006082	organic acid metabolic process	GO_BiologicalProcess-EBI-UniProt-GOA_17.02.2020_00h00	3.04097e-18	2.56354e-15	1.11861e-28	3.6914e-27	[3]	Group33	6.41026	80	[AARS1, ABAT, ACAA2, ACADM, ACADVL, ACO1, ACO2, ACOT1, ACOT2, ACSL1, ACSS1, ADH4, ADH5, AIFM2, AKR1A1, AKR1C1, AKR1C3, ALDH3A2, ALDH4A1, ALDH9A1, ARSA, ATIC, BANF1, BDH2, CAD, CARS1, CAT, CYB5A, DECR1, DTD1, EPRS1, FABP3, FAH, FASN, GALNS, GCLC, GGH, GLB1, GLDC, GLUL, GNS, GRHPR, GSS, HAAO, HARS1, HEXA, HEXB, HGD, HSD17B10, IDH2, IVD, KARS1, LARS1, LTA4H, MDH1, ME1, ME2, NAALAD2, NIT2, NPEPPS, OA…
GO:0006629	lipid metabolic process	GO_BiologicalProcess-EBI-UniProt-GOA_17.02.2020_00h00	5.36885e-06	0.00390315	1.11861e-28	3.6914e-27	[3]	Group33	4.02955	60	[ACAA2, ACADM, ACADVL, ACOT1, ACOT2, ACSL1, ACSS1, ACTR1A, ADH4, ADH5, AFP, AIFM2, AKR1A1, AKR1C1, AKR1C3, ALDH3A2, ALDH9A1, APOA1, APOC3, APOD, APOE, ARSA, ASAH1, BDH2, CAT, CSNK2A1, CSNK2A2, CTSA, DECR1, DHCR24, FABP3, FASN, FUCA1, G6PD, GLB1, HEXA, HEXB, HSD17B10, IVD, LTA4H, NAGA, NEU1, NPC2, PAFAH1B1, PCCB, PEBP1, PPT1, PRDX5, PRPF19, PTGES3, PTPN11, RBP4, SCRN1, SUMF2, TBL1XR1, TPP1, TXN, U…
GO:0016491	oxidoreductase activity	GO_BiologicalProcess-EBI-UniProt-GOA_17.02.2020_00h00	1.51117e-14	1.25427e-11	1.11861e-28	3.6914e-27	[3]	Group33	6.76606	59	[ACADM, ACADVL, ADH4, ADH5, AIFM2, AKR1A1, AKR1C1, AKR1C3, AKR7A2, ALDH2, ALDH3A2, ALDH4A1, ALDH9A1, APEX1, ARSA, BDH2, BLVRB, CAT, COX7A2, CPOX, CRYZ, CYB5A, DECR1, DHCR24, FASN, G6PD, GLDC, GLRX5, GRHPR, GSR, HAAO, HGD, HMOX1, HSD17B10, IDH2, IVD, MAT2B, MDH1, ME1, ME2, MGST1, NDUFA4, PCBD1, PCYOX1, PDIA4, PGD, PNPO, PRDX5, QDPR, SDHB, SELENBP1, SORD, TP53I3, TSTA3, TXN, TXNDC17, TXNL1, TXNRD2,…
GO:0017144	drug metabolic process	GO_BiologicalProcess-EBI-UniProt-GOA_17.02.2020_00h00	2.32663e-11	1.89621e-08	1.11861e-28	3.6914e-27	[3]	Group33	6.79758	45	[ACO1, ACO2, ACSL1, ACSS1, ADH4, ADH5, ADK, AFP, AKR1A1, AKR1C1, AKR1C3, AKR7A2, ALDH2, ALDH3A2, ALDH9A1, ATP5ME, BDH2, CAD, CAT, CTSB, CTSH, FAH, GLDC, HAAO, HGD, IDE, MAT2A, MAT2B, NPEPPS, OAT, PAFAH1B1, PCBD1, PCCB, PDXK, PNPO, PRDX5, PRMT1, QDPR, SDHB, SHMT1, SHMT2, SLC19A3, SORD, UGGT1, YWHAE]
GO:0044282	small molecule catabolic process	GO_BiologicalProcess-EBI-UniProt-GOA_17.02.2020_00h00	1.25127e-12	1.02979e-09	1.11861e-28	3.6914e-27	[3]	Group33	7.67857	43	[ABAT, ACAA2, ACADM, ACADVL, ADH4, ADH5, AKR1A1, AKR1C1, AKR1C3, ALDH2, ALDH3A2, ALDH4A1, ALDH9A1, APOE, BDH2, DECR1, FAH, GALE, GLB1, GLDC, GLUL, HAAO, HEXA, HEXB, HGD, HSD17B10, IVD, NUDT5, OAT, PCBD1, PCCB, PCYOX1, PGD, PGM2, PRDX5, QDPR, RBKS, SDHB, SHMT1, SHMT2, SORD, TKFC, UPB1]
GO:0044283	small molecule biosynthetic process	GO_BiologicalProcess-EBI-UniProt-GOA_17.02.2020_00h00	4.49223e-11	3.64769e-08	1.11861e-28	3.6914e-27	[3]	Group33	6.3745	48	[ABAT, ACAA2, ACSS1, ADK, AIFM2, AKR1A1, AKR1C1, AKR1C3, APOA1, ARSA, ASAH1, ATIC, BDH2, CAD, CNP, DHCR24, FASN, FBP1, G6PD, GLB1, GLUL, HAAO, LTA4H, MDH1, NAALAD2, NME1-NME2, NME2, NPEPPS, NUDT5, OAT, PCBD1, PCCB, PDXK, PGD, PNPO, PRDX5, PTGES3, QDPR, RBP4, SCRN1, SDHB, SHMT1, SHMT2, SORD, TALDO1, UGP2, UPB1, VCP]
GO:1901575	organic substance catabolic process	GO_BiologicalProcess-EBI-UniProt-GOA_17.02.2020_00h00	7.04041e-19	5.95619e-16	1.11861e-28	3.6914e-27	[3]	Group33	5.21218	113	[ABAT, ACAA2, ACADM, ACADVL, ADH4, ADH5, AKR1A1, AKR1C1, AKR1C3, ALDH2, ALDH3A2, ALDH4A1, ALDH9A1, AP2A2, APOC3, APOE, ASAH1, BDH2, BLVRB, CAD, CAPN1, CLTC, CNP, CPOX, CPQ, CPVL, CTSA, CTSB, CTSC, CTSD, CTSH, DDB1, DECR1, DNAJB12, ELOC, EXOSC7, FABP3, FAH, FUCA1, GAA, GALE, GALNS, GLB1, GLDC, GLUL, GNS, HAAO, HEXA, HEXB, HGD, HMOX1, HSD17B10, IDE, ISG15, IVD, LTA4H, MAGOHB, NAGA, NEU1, NPEPPS, NU…
GO:0042133	neurotransmitter metabolic process	GO_BiologicalProcess-EBI-UniProt-GOA_17.02.2020_00h00	1.02664e-05	0.00722756	1.11861e-28	3.6914e-27	[3, 4]	Group33	10.3448	12	[ABAT, AIFM2, ALDH4A1, ALDH9A1, CAT, GLDC, NAALAD2, SDHB, SHMT1, SHMT2, SORD, UPB1]
GO:0044255	cellular lipid metabolic process	GO_BiologicalProcess-EBI-UniProt-GOA_17.02.2020_00h00	8.08258e-06	0.00577096	1.11861e-28	3.6914e-27	[3, 4]	Group33	4.25894	50	[ACAA2, ACADM, ACADVL, ACOT1, ACOT2, ACSL1, ACSS1, ADH4, ADH5, AIFM2, AKR1A1, AKR1C1, AKR1C3, ALDH3A2, ALDH9A1, APOA1, APOC3, APOE, ARSA, ASAH1, BDH2, CAT, CSNK2A1, CSNK2A2, CTSA, DECR1, FABP3, FASN, FUCA1, GLB1, HEXA, HEXB, HSD17B10, IVD, LTA4H, NAGA, NEU1, PAFAH1B1, PCCB, PPT1, PRDX5, PTGES3, PTPN11, RBP4, SCRN1, SUMF2, TXN, UGGT1, VPS29, YWHAE]
GO:0016042	lipid catabolic process	GO_BiologicalProcess-EBI-UniProt-GOA_17.02.2020_00h00	3.84966e-07	0.000295269	1.11861e-28	3.6914e-27	[4]	Group33	6.86016	26	[ACAA2, ACADM, ACADVL, ADH5, AKR1C1, AKR1C3, ALDH3A2, APOC3, APOE, ASAH1, BDH2, DECR1, FABP3, FUCA1, HEXB, HSD17B10, IVD, NAGA, NEU1, PAFAH1B1, PCCB, PPT1, PRDX5, SCRN1, TBL1XR1, YWHAE]
GO:0016053	organic acid biosynthetic process	GO_BiologicalProcess-EBI-UniProt-GOA_17.02.2020_00h00	1.76085e-06	0.00131359	1.11861e-28	3.6914e-27	[4]	Group33	6.49351	25	[ABAT, ACSS1, AIFM2, AKR1A1, AKR1C1, AKR1C3, ARSA, ATIC, CAD, FASN, GLUL, HAAO, LTA4H, NAALAD2, NPEPPS, OAT, PCCB, PRDX5, PTGES3, SDHB, SHMT1, SHMT2, SORD, UGP2, UPB1]
GO:0016054	organic acid catabolic process	GO_BiologicalProcess-EBI-UniProt-GOA_17.02.2020_00h00	2.53796e-10	2.04813e-07	1.11861e-28	3.6914e-27	[4]	Group33	8.59599	30	[ABAT, ACAA2, ACADM, ACADVL, ADH5, AKR1A1, ALDH3A2, ALDH4A1, ALDH9A1, BDH2, DECR1, FAH, GLDC, GLUL, HAAO, HEXA, HEXB, HGD, HSD17B10, IVD, OAT, PCBD1, PCCB, PCYOX1, PGD, QDPR, SDHB, SHMT1, SHMT2, SORD]
GO:0016614	oxidoreductase activity, acting on CH-OH group of donors	GO_BiologicalProcess-EBI-UniProt-GOA_17.02.2020_00h00	2.27834e-09	1.82723e-06	1.11861e-28	3.6914e-27	[4]	Group33	12.0253	19	[ADH4, ADH5, AKR1A1, AKR1C1, AKR1C3, AKR7A2, ALDH3A2, BDH2, FASN, G6PD, GRHPR, HSD17B10, IDH2, MDH1, ME1, ME2, PGD, SORD, TSTA3]
GO:0016627	oxidoreductase activity, acting on the CH-CH group of donors	GO_BiologicalProcess-EBI-UniProt-GOA_17.02.2020_00h00	3.21473e-09	2.57179e-06	1.11861e-28	3.6914e-27	[4]	Group33	18.8406	13	[ACADM, ACADVL, AKR1C1, AKR1C3, BDH2, BLVRB, CPOX, DECR1, DHCR24, FASN, IVD, SDHB, SORD]
GO:0043436	oxoacid metabolic process	GO_BiologicalProcess-EBI-UniProt-GOA_17.02.2020_00h00	2.36345e-18	1.99475e-15	1.11861e-28	3.6914e-27	[4]	Group33	6.49671	79	[AARS1, ABAT, ACAA2, ACADM, ACADVL, ACO1, ACO2, ACOT1, ACOT2, ACSL1, ACSS1, ADH4, ADH5, AIFM2, AKR1A1, AKR1C1, AKR1C3, ALDH3A2, ALDH4A1, ALDH9A1, ARSA, ATIC, BDH2, CAD, CARS1, CAT, CYB5A, DECR1, DTD1, EPRS1, FABP3, FAH, FASN, GALNS, GCLC, GGH, GLB1, GLDC, GLUL, GNS, GRHPR, GSS, HAAO, HARS1, HEXA, HEXB, HGD, HSD17B10, IDH2, IVD, KARS1, LARS1, LTA4H, MDH1, ME1, ME2, NAALAD2, NIT2, NPEPPS, OAT, PCBD…
GO:0006520	cellular amino acid metabolic process	GO_BiologicalProcess-EBI-UniProt-GOA_17.02.2020_00h00	1.22644e-12	1.01059e-09	1.11861e-28	3.6914e-27	[3, 4, 6]	Group33	9.1623	35	[AARS1, ABAT, ALDH4A1, ALDH9A1, CAD, CARS1, CAT, DTD1, EPRS1, FAH, GCLC, GLDC, GLUL, GSS, HAAO, HARS1, HGD, HSD17B10, IVD, KARS1, LARS1, NAALAD2, NIT2, NPEPPS, OAT, PCBD1, PCYOX1, PFAS, QDPR, SDHB, SHMT1, SHMT2, SORD, TARS1, UPB1]
GO:0044242	cellular lipid catabolic process	GO_BiologicalProcess-EBI-UniProt-GOA_17.02.2020_00h00	1.80845e-07	0.000139974	1.11861e-28	3.6914e-27	[4, 5]	Group33	8.43373	21	[ACAA2, ACADM, ACADVL, ADH5, AKR1C1, AKR1C3, ALDH3A2, APOC3, ASAH1, BDH2, DECR1, FABP3, FUCA1, HEXB, HSD17B10, IVD, NAGA, NEU1, PCCB, PPT1, PRDX5]
GO:0034440	lipid oxidation	GO_BiologicalProcess-EBI-UniProt-GOA_17.02.2020_00h00	1.77055e-05	0.0121106	1.11861e-28	3.6914e-27	[3, 5, 6]	Group33	10.6796	11	[ACAA2, ACADM, ACADVL, ADH4, ADH5, ALDH3A2, BDH2, DECR1, HSD17B10, IVD, PAFAH1B1]
GO:0016616	oxidoreductase activity, acting on the CH-OH group of donors, NAD or NADP as acceptor	GO_BiologicalProcess-EBI-UniProt-GOA_17.02.2020_00h00	6.2522e-09	4.96425e-06	1.11861e-28	3.6914e-27	[5]	Group33	12	18	[ADH4, ADH5, AKR1A1, AKR1C1, AKR1C3, AKR7A2, BDH2, FASN, G6PD, GRHPR, HSD17B10, IDH2, MDH1, ME1, ME2, PGD, SORD, TSTA3]
GO:0019752	carboxylic acid metabolic process	GO_BiologicalProcess-EBI-UniProt-GOA_17.02.2020_00h00	6.29989e-19	5.33601e-16	1.11861e-28	3.6914e-27	[5]	Group33	6.84068	76	[AARS1, ABAT, ACAA2, ACADM, ACADVL, ACO1, ACO2, ACOT1, ACOT2, ACSL1, ACSS1, ADH4, ADH5, AIFM2, AKR1A1, AKR1C1, AKR1C3, ALDH3A2, ALDH4A1, ALDH9A1, ARSA, ATIC, BDH2, CAD, CARS1, CAT, CYB5A, DECR1, DTD1, EPRS1, FABP3, FAH, FASN, GCLC, GGH, GLDC, GLUL, GRHPR, GSS, HAAO, HARS1, HEXA, HEXB, HGD, HSD17B10, IDH2, IVD, KARS1, LARS1, LTA4H, MDH1, ME1, ME2, NAALAD2, NIT2, NPEPPS, OAT, PCBD1, PCCB, PCYOX1, P…
GO:0006631	fatty acid metabolic process	GO_BiologicalProcess-EBI-UniProt-GOA_17.02.2020_00h00	2.545e-06	0.00188585	1.11861e-28	3.6914e-27	[4, 5, 7]	Group33	6.36132	25	[ACAA2, ACADM, ACADVL, ACOT1, ACOT2, ACSL1, ACSS1, ADH4, ADH5, AKR1C1, AKR1C3, ALDH3A2, ARSA, BDH2, DECR1, FABP3, FASN, HSD17B10, IVD, LTA4H, PCCB, PRDX5, PTGES3, SCRN1, UGGT1]
GO:1901605	alpha-amino acid metabolic process	GO_BiologicalProcess-EBI-UniProt-GOA_17.02.2020_00h00	8.30341e-07	0.000631059	1.11861e-28	3.6914e-27	[4, 5, 7]	Group33	7.69231	21	[ALDH4A1, ALDH9A1, CAD, CAT, FAH, GCLC, GLDC, GLUL, HAAO, HGD, IVD, NIT2, NPEPPS, OAT, PCBD1, PFAS, QDPR, SDHB, SHMT1, SHMT2, SORD]
GO:0009063	cellular amino acid catabolic process	GO_BiologicalProcess-EBI-UniProt-GOA_17.02.2020_00h00	1.18557e-07	9.22376e-05	1.11861e-28	3.6914e-27	[4, 5, 6, 7]	Group33	9.94475	18	[ABAT, ALDH4A1, ALDH9A1, FAH, GLDC, GLUL, HAAO, HGD, HSD17B10, IVD, OAT, PCBD1, PCYOX1, QDPR, SDHB, SHMT1, SHMT2, SORD]
GO:0046394	carboxylic acid biosynthetic process	GO_BiologicalProcess-EBI-UniProt-GOA_17.02.2020_00h00	1.60309e-06	0.00120232	1.11861e-28	3.6914e-27	[5, 6]	Group33	6.52742	25	[ABAT, ACSS1, AIFM2, AKR1A1, AKR1C1, AKR1C3, ARSA, ATIC, CAD, FASN, GLUL, HAAO, LTA4H, NAALAD2, NPEPPS, OAT, PCCB, PRDX5, PTGES3, SDHB, SHMT1, SHMT2, SORD, UGP2, UPB1]
GO:0046395	carboxylic acid catabolic process	GO_BiologicalProcess-EBI-UniProt-GOA_17.02.2020_00h00	2.53796e-10	2.04813e-07	1.11861e-28	3.6914e-27	[5, 6]	Group33	8.59599	30	[ABAT, ACAA2, ACADM, ACADVL, ADH5, AKR1A1, ALDH3A2, ALDH4A1, ALDH9A1, BDH2, DECR1, FAH, GLDC, GLUL, HAAO, HEXA, HEXB, HGD, HSD17B10, IVD, OAT, PCBD1, PCCB, PCYOX1, PGD, QDPR, SDHB, SHMT1, SHMT2, SORD]
GO:0032787	monocarboxylic acid metabolic process	GO_BiologicalProcess-EBI-UniProt-GOA_17.02.2020_00h00	4.29312e-09	3.42591e-06	1.11861e-28	3.6914e-27	[6]	Group33	6.1194	41	[ABAT, ACAA2, ACADM, ACADVL, ACOT1, ACOT2, ACSL1, ACSS1, ADH4, ADH5, AKR1A1, AKR1C1, AKR1C3, ALDH3A2, ALDH4A1, ALDH9A1, ARSA, BDH2, CAT, DECR1, FABP3, FAH, FASN, GRHPR, HAAO, HSD17B10, IDH2, IVD, LTA4H, ME1, ME2, NIT2, PCCB, PGD, PRDX5, PTGES3, SCRN1, SDHB, SORD, UGGT1, UGT2A1]
GO:0043648	dicarboxylic acid metabolic process	GO_BiologicalProcess-EBI-UniProt-GOA_17.02.2020_00h00	9.93702e-10	8.00924e-07	1.11861e-28	3.6914e-27	[6]	Group33	13.4328	18	[ALDH4A1, ALDH9A1, ATIC, GCLC, GLUL, GRHPR, HAAO, IDH2, MDH1, ME1, ME2, NIT2, OAT, PRMT1, SDHB, SHMT1, SHMT2, SORD]
GO:0006544	glycine metabolic process	GO_BiologicalProcess-EBI-UniProt-GOA_17.02.2020_00h00	8.36083e-06	0.00595291	1.11861e-28	3.6914e-27	[4, 5, 6, 7, 9]	Group33	26.087	6	[CAT, GLDC, SDHB, SHMT1, SHMT2, SORD]
GO:0009069	serine family amino acid metabolic process	GO_BiologicalProcess-EBI-UniProt-GOA_17.02.2020_00h00	7.23384e-05	0.0462242	1.11861e-28	3.6914e-27	[5, 6, 8]	Group33	12.6984	8	[CAT, GCLC, GLDC, NPEPPS, SDHB, SHMT1, SHMT2, SORD]
GO:0072329	monocarboxylic acid catabolic process	GO_BiologicalProcess-EBI-UniProt-GOA_17.02.2020_00h00	2.42114e-06	0.00179649	1.11861e-28	3.6914e-27	[6, 7]	Group33	9.49367	15	[ABAT, ACAA2, ACADM, ACADVL, ADH5, AKR1A1, ALDH3A2, BDH2, DECR1, FAH, HSD17B10, IVD, PCCB, PGD, SORD]
GO:1901606	alpha-amino acid catabolic process	GO_BiologicalProcess-EBI-UniProt-GOA_17.02.2020_00h00	1.75342e-06	0.0013098	1.11861e-28	3.6914e-27	[5, 6, 7, 8]	Group33	9.74026	15	[ALDH4A1, ALDH9A1, FAH, GLDC, GLUL, HAAO, HGD, IVD, OAT, PCBD1, QDPR, SDHB, SHMT1, SHMT2, SORD]
GO:0006563	L-serine metabolic process	GO_BiologicalProcess-EBI-UniProt-GOA_17.02.2020_00h00	6.13706e-05	0.0395227	1.11861e-28	3.6914e-27	[6, 7, 9]	Group33	25	5	[NPEPPS, SDHB, SHMT1, SHMT2, SORD]
GO:0006565	L-serine catabolic process	GO_BiologicalProcess-EBI-UniProt-GOA_17.02.2020_00h00	4.48634e-05	0.0295201	1.11861e-28	3.6914e-27	[7, 8, 9, 10]	Group33	40	4	[SDHB, SHMT1, SHMT2, SORD]
GO:0019884	antigen processing and presentation of exogenous antigen	GO_BiologicalProcess-EBI-UniProt-GOA_17.02.2020_00h00	1.13071e-07	8.80824e-05	1.06731e-22	3.0952e-21	[3]	Group34	9.04977	20	[ACTR1A, AP1B1, AP2A2, CALR, CLTC, CTSD, DYNC1H1, DYNLL1, DYNLL2, HLA-A, PSMA1, PSMA6, PSMB1, PSMB2, PSMB3, PSMB4, PSMB5, PSMD10, PSMD12, PSMD6]
GO:0044248	cellular catabolic process	GO_BiologicalProcess-EBI-UniProt-GOA_17.02.2020_00h00	1.70535e-21	1.46319e-18	1.06731e-22	3.0952e-21	[3]	Group34	5.43478	120	[ABAT, ACAA2, ACADM, ACADVL, ACSL1, ADH4, ADH5, AKR1A1, AKR1C1, AKR1C3, ALDH2, ALDH3A2, ALDH4A1, ALDH9A1, AP2A2, APEX1, APOC3, ARSA, ASAH1, BDH2, BLVRB, CAD, CAPN1, CAT, CLTC, CNP, CPOX, CPQ, CPVL, CRYZ, CSNK2A1, CSNK2A2, CTSA, CTSB, CTSC, CTSH, DDB1, DECR1, DNAJB12, DNPEP, DYNLL1, DYNLL2, ELOC, EPHX1, EXOSC7, FABP3, FAH, FUCA1, GAA, GALNS, GLB1, GLDC, GLUL, GNS, GSTM3, HAAO, HARS1, HEXA, HEXB, H…
GO:0048002	antigen processing and presentation of peptide antigen	GO_BiologicalProcess-EBI-UniProt-GOA_17.02.2020_00h00	6.75591e-08	5.29664e-05	1.06731e-22	3.0952e-21	[3]	Group34	8.93617	21	[ACTR1A, AP1B1, AP2A2, CALR, CLTC, CTSD, DYNC1H1, DYNLL1, DYNLL2, HLA-A, IDE, PSMA1, PSMA6, PSMB1, PSMB2, PSMB3, PSMB4, PSMB5, PSMD10, PSMD12, PSMD6]
GO:1901575	organic substance catabolic process	GO_BiologicalProcess-EBI-UniProt-GOA_17.02.2020_00h00	7.04041e-19	5.95619e-16	1.06731e-22	3.0952e-21	[3]	Group34	5.21218	113	[ABAT, ACAA2, ACADM, ACADVL, ADH4, ADH5, AKR1A1, AKR1C1, AKR1C3, ALDH2, ALDH3A2, ALDH4A1, ALDH9A1, AP2A2, APOC3, APOE, ASAH1, BDH2, BLVRB, CAD, CAPN1, CLTC, CNP, CPOX, CPQ, CPVL, CTSA, CTSB, CTSC, CTSD, CTSH, DDB1, DECR1, DNAJB12, ELOC, EXOSC7, FABP3, FAH, FUCA1, GAA, GALE, GALNS, GLB1, GLDC, GLUL, GNS, HAAO, HEXA, HEXB, HGD, HMOX1, HSD17B10, IDE, ISG15, IVD, LTA4H, MAGOHB, NAGA, NEU1, NPEPPS, NU…
GO:0198738	cell-cell signaling by wnt	GO_BiologicalProcess-EBI-UniProt-GOA_17.02.2020_00h00	3.00726e-06	0.00221635	1.06731e-22	3.0952e-21	[3, 4]	Group34	6.14657	26	[AP2A2, CLTC, CSNK2A1, CSNK2A2, DDB1, GTF2I, LEO1, PSMA1, PSMA6, PSMB1, PSMB2, PSMB3, PSMB4, PSMB5, PSMD10, PSMD12, PSMD6, RPS27A, UBA52, UBB, UBC, VPS26A, VPS29, VPS35, WDR1, WDR61]
GO:0002474	antigen processing and presentation of peptide antigen via MHC class I	GO_BiologicalProcess-EBI-UniProt-GOA_17.02.2020_00h00	1.61773e-06	0.00121168	1.06731e-22	3.0952e-21	[4]	Group34	11.3043	13	[CALR, HLA-A, IDE, PSMA1, PSMA6, PSMB1, PSMB2, PSMB3, PSMB4, PSMB5, PSMD10, PSMD12, PSMD6]
GO:0002478	antigen processing and presentation of exogenous peptide antigen	GO_BiologicalProcess-EBI-UniProt-GOA_17.02.2020_00h00	6.64338e-08	5.21505e-05	1.06731e-22	3.0952e-21	[4]	Group34	9.34579	20	[ACTR1A, AP1B1, AP2A2, CALR, CLTC, CTSD, DYNC1H1, DYNLL1, DYNLL2, HLA-A, PSMA1, PSMA6, PSMB1, PSMB2, PSMB3, PSMB4, PSMB5, PSMD10, PSMD12, PSMD6]
GO:0009057	macromolecule catabolic process	GO_BiologicalProcess-EBI-UniProt-GOA_17.02.2020_00h00	1.07557e-08	8.51852e-06	1.06731e-22	3.0952e-21	[4]	Group34	4.78026	62	[AP2A2, APOE, CAD, CAPN1, CLTC, CPOX, CPVL, CTSA, CTSB, CTSC, CTSD, CTSH, DDB1, DNAJB12, ELOC, EXOSC7, FUCA1, GAA, GALNS, GLB1, GNS, HEXA, HEXB, IDE, ISG15, MAGOHB, PABPC1, PCYOX1, PGM2, PPT1, PRPF19, PSMA1, PSMA6, PSMB1, PSMB2, PSMB3, PSMB4, PSMB5, PSMD10, PSMD12, PSMD6, PYGB, RNASET2, RNH1, RPL10A, RPS27A, RPSA, STT3B, TALDO1, TBL1XR1, TPP1, UBA52, UBB, UBC, UBXN4, UCHL1, UGGT1, UPF1, VCP, WDR1…
GO:0009894	regulation of catabolic process	GO_BiologicalProcess-EBI-UniProt-GOA_17.02.2020_00h00	1.51912e-06	0.00114541	1.06731e-22	3.0952e-21	[4]	Group34	4.33412	55	[ALAD, ANP32A, APEX1, APOA1, APOC3, APOE, CAPN1, CD81, CSNK2A1, CSNK2A2, CSNK2A3, CTSA, CTSC, DDB1, DNPEP, ELAVL1, EXOSC7, FBP1, FLNA, GCLC, HARS1, HMOX1, IDE, KTN1, LIG3, LRPPRC, METAP1, NUP210, PABPC1, PSMA1, PSMA6, PSMB1, PSMB2, PSMB3, PSMB4, PSMB5, PSMD10, PSMD12, PSMD6, RACK1, RPS27A, SET, SF3B3, TALDO1, UBA52, UBB, UBC, UCHL1, UPF1, VCP, VPS26A, VPS35, WDR1, YWHAB, YWHAZ]
GO:0034097	response to cytokine	GO_BiologicalProcess-EBI-UniProt-GOA_17.02.2020_00h00	6.02408e-06	0.00436143	1.06731e-22	3.0952e-21	[4]	Group34	4.11255	57	[ACSL1, ACTR3, ADAR, ALAD, ASAH1, ATIC, CPOX, DPYSL3, EPRS1, FASN, FGG, FN1, FSCN1, GCLC, GLDC, GLUL, GRB2, GSS, HLA-A, HMOX1, HNRNPDL, HNRNPF, IL18, ISG15, KARS1, MAT2A, MCM2, MYDGF, PRPF8, PSMA1, PSMA6, PSMB1, PSMB2, PSMB3, PSMB4, PSMB5, PSMD10, PSMD12, PSMD6, PTPN11, RAP1B, RPS27A, RPSA, SHMT1, SHMT2, SMARCA5, TALDO1, TXNDC17, UBA52, UBB, UBC, UPF1, WDR1, XRCC5, YWHAB, YWHAQ, YWHAZ]
GO:0043902	positive regulation of multi-organism process	GO_BiologicalProcess-EBI-UniProt-GOA_17.02.2020_00h00	5.71455e-05	0.0369731	1.06731e-22	3.0952e-21	[4]	Group34	4.79134	31	[ADAR, APOE, CTSB, CTSH, DDB1, FGG, IGFBP7, PABPC1, PEBP1, POLR2A, POLR2B, PRKDC, PSMA1, PSMA6, PSMB1, PSMB2, PSMB3, PSMB4, PSMB5, PSMD10, PSMD12, PSMD6, RPS27A, RPSA, STAU1, TALDO1, UBA52, UBB, UBC, XRCC5, XRCC6]
GO:0071453	cellular response to oxygen levels	GO_BiologicalProcess-EBI-UniProt-GOA_17.02.2020_00h00	5.19152e-05	0.0337968	1.06731e-22	3.0952e-21	[4]	Group34	6.25	19	[ACAA2, ELOC, FASN, HMOX1, NPEPPS, PSMA1, PSMA6, PSMB1, PSMB2, PSMB3, PSMB4, PSMB5, PSMD10, PSMD12, PSMD6, RPS27A, UBA52, UBB, UBC]
GO:1901565	organonitrogen compound catabolic process	GO_BiologicalProcess-EBI-UniProt-GOA_17.02.2020_00h00	8.40611e-14	6.96026e-11	1.06731e-22	3.0952e-21	[4]	Group34	5.60538	75	[ABAT, ALDH4A1, ALDH9A1, AP2A2, APOE, ASAH1, BLVRB, CLTC, CPOX, CPQ, CPVL, CTSA, CTSB, CTSC, CTSD, CTSH, DDB1, DNAJB12, ELOC, EXOSC7, FAH, FUCA1, GALNS, GLB1, GLDC, GLUL, GNS, HAAO, HEXA, HEXB, HGD, HMOX1, HSD17B10, IDE, ISG15, IVD, LTA4H, NAGA, NEU1, NPEPPS, OAT, PCBD1, PCYOX1, PPT1, PRDX5, PRPF19, PSMA1, PSMA6, PSMB1, PSMB2, PSMB3, PSMB4, PSMB5, PSMD10, PSMD12, PSMD6, QDPR, RPS27A, SDHB, SHMT1,…
GO:0006508	proteolysis	GO_BiologicalProcess-EBI-UniProt-GOA_17.02.2020_00h00	4.20326e-08	3.30376e-05	1.06731e-22	3.0952e-21	[4, 5]	Group34	4.3949	69	[ACTL6A, APEH, CAPN1, CNDP2, COPS6, CPD, CPOX, CPQ, CPVL, CTSA, CTSB, CTSC, CTSD, CTSH, DDB1, DHCR24, DNAJB12, DNPEP, DPP3, DPP7, ELOC, ERMP1, EXOSC7, FGG, GGH, HARS1, IDE, IGFBP7, ISG15, LAP3, LTA4H, METAP1, MYH9, NAALAD2, NLN, NPEPPS, PCYOX1, PITRM1, PRCP, PRPF19, PSMA1, PSMA6, PSMB1, PSMB2, PSMB3, PSMB4, PSMB5, PSMD10, PSMD12, PSMD6, RNPEP, RPS27A, SCRN1, SCRN2, SHMT1, SHMT2, STT3B, SUB1, TBL1…
GO:0030163	protein catabolic process	GO_BiologicalProcess-EBI-UniProt-GOA_17.02.2020_00h00	1.88172e-06	0.0014	1.06731e-22	3.0952e-21	[4, 5]	Group34	4.91228	42	[AP2A2, APOE, CLTC, CPOX, CPVL, CTSA, CTSB, CTSC, CTSD, CTSH, DDB1, DNAJB12, ELOC, EXOSC7, IDE, ISG15, PCYOX1, PPT1, PRPF19, PSMA1, PSMA6, PSMB1, PSMB2, PSMB3, PSMB4, PSMB5, PSMD10, PSMD12, PSMD6, RPS27A, STT3B, TALDO1, TBL1XR1, TPP1, UBA52, UBB, UBC, UBXN4, UCHL1, UGGT1, VCP, WDR1]
GO:0044265	cellular macromolecule catabolic process	GO_BiologicalProcess-EBI-UniProt-GOA_17.02.2020_00h00	2.1333e-05	0.0144851	1.06731e-22	3.0952e-21	[4, 5]	Group34	4.21147	47	[AP2A2, CAD, CLTC, CPVL, CTSA, CTSB, CTSC, CTSH, DDB1, DNAJB12, ELOC, EXOSC7, IDE, ISG15, MAGOHB, PABPC1, PCYOX1, PPT1, PRPF19, PSMA1, PSMA6, PSMB1, PSMB2, PSMB3, PSMB4, PSMB5, PSMD10, PSMD12, PSMD6, RNASET2, RNH1, RPL10A, RPS27A, RPSA, STT3B, TBL1XR1, UBA52, UBB, UBC, UBXN4, UCHL1, UGGT1, UPF1, VCP, WDR1, WDR61, XRN2]
GO:0010565	regulation of cellular ketone metabolic process	GO_BiologicalProcess-EBI-UniProt-GOA_17.02.2020_00h00	4.7579e-05	0.0311643	1.06731e-22	3.0952e-21	[5]	Group34	6.77291	17	[ACADVL, AKR1C1, AKR1C3, APOA1, APOC3, FABP3, PSMA1, PSMA6, PSMB1, PSMB2, PSMB3, PSMB4, PSMB5, PSMD10, PSMD12, PSMD6, UGGT1]
GO:0031329	regulation of cellular catabolic process	GO_BiologicalProcess-EBI-UniProt-GOA_17.02.2020_00h00	1.24108e-05	0.00863789	1.06731e-22	3.0952e-21	[5]	Group34	4.34372	46	[ALAD, ANP32A, APEX1, APOA1, APOC3, APOE, CAPN1, CD81, CSNK2A1, CSNK2A2, CTSA, CTSC, DNPEP, ELAVL1, EXOSC7, GCLC, HMOX1, LIG3, LRPPRC, METAP1, PABPC1, PSMA1, PSMA6, PSMB1, PSMB2, PSMB3, PSMB4, PSMB5, PSMD10, PSMD12, PSMD6, RACK1, RPS27A, SET, TALDO1, UBA52, UBB, UBC, UCHL1, UPF1, VCP, VPS26A, VPS35, WDR1, YWHAB, YWHAZ]
GO:0033238	regulation of cellular amine metabolic process	GO_BiologicalProcess-EBI-UniProt-GOA_17.02.2020_00h00	2.15536e-06	0.00160143	1.06731e-22	3.0952e-21	[5]	Group34	12	12	[ABAT, PSMA1, PSMA6, PSMB1, PSMB2, PSMB3, PSMB4, PSMB5, PSMD10, PSMD12, PSMD6, VPS35]
GO:0036294	cellular response to decreased oxygen levels	GO_BiologicalProcess-EBI-UniProt-GOA_17.02.2020_00h00	4.48756e-05	0.0294833	1.06731e-22	3.0952e-21	[5]	Group34	6.54545	18	[ACAA2, ELOC, HMOX1, NPEPPS, PSMA1, PSMA6, PSMB1, PSMB2, PSMB3, PSMB4, PSMB5, PSMD10, PSMD12, PSMD6, RPS27A, UBA52, UBB, UBC]
GO:0042590	antigen processing and presentation of exogenous peptide antigen via MHC class I	GO_BiologicalProcess-EBI-UniProt-GOA_17.02.2020_00h00	1.55274e-06	0.00116921	1.06731e-22	3.0952e-21	[5]	Group34	12.3711	12	[CALR, HLA-A, PSMA1, PSMA6, PSMB1, PSMB2, PSMB3, PSMB4, PSMB5, PSMD10, PSMD12, PSMD6]
GO:0045088	regulation of innate immune response	GO_BiologicalProcess-EBI-UniProt-GOA_17.02.2020_00h00	6.93671e-05	0.0443949	1.06731e-22	3.0952e-21	[4, 5, 6]	Group34	4.99139	29	[ADAR, APOE, CPOX, CTSB, CTSH, FGG, IGFBP7, PEBP1, PRKDC, PSMA1, PSMA6, PSMB1, PSMB2, PSMB3, PSMB4, PSMB5, PSMD10, PSMD12, PSMD6, PTPN11, RPS27A, RPSA, TKFC, UBA52, UBB, UBC, WDR1, XRCC5, XRCC6]
GO:0070555	response to interleukin-1	GO_BiologicalProcess-EBI-UniProt-GOA_17.02.2020_00h00	2.75713e-05	0.0184452	1.06731e-22	3.0952e-21	[5]	Group34	6.79245	18	[FGG, GCLC, PSMA1, PSMA6, PSMB1, PSMB2, PSMB3, PSMB4, PSMB5, PSMD10, PSMD12, PSMD6, RPS27A, UBA52, UBB, UBC, UPF1, WDR1]
GO:0071345	cellular response to cytokine stimulus	GO_BiologicalProcess-EBI-UniProt-GOA_17.02.2020_00h00	4.16238e-06	0.00303854	1.06731e-22	3.0952e-21	[5]	Group34	4.23529	54	[ACSL1, ACTR3, ADAR, ALAD, ASAH1, ATIC, CPOX, DPYSL3, EPRS1, FASN, FGG, FN1, FSCN1, GLDC, GLUL, GRB2, HLA-A, HMOX1, HNRNPDL, HNRNPF, IL18, ISG15, KARS1, MAT2A, MCM2, MYDGF, PRPF8, PSMA1, PSMA6, PSMB1, PSMB2, PSMB3, PSMB4, PSMB5, PSMD10, PSMD12, PSMD6, PTPN11, RAP1B, RPS27A, RPSA, SHMT1, SMARCA5, TALDO1, TXNDC17, UBA52, UBB, UBC, UPF1, WDR1, XRCC5, YWHAB, YWHAQ, YWHAZ]
GO:0071456	cellular response to hypoxia	GO_BiologicalProcess-EBI-UniProt-GOA_17.02.2020_00h00	1.64831e-05	0.0113569	1.06731e-22	3.0952e-21	[4, 6]	Group34	7.05882	18	[ACAA2, ELOC, HMOX1, NPEPPS, PSMA1, PSMA6, PSMB1, PSMB2, PSMB3, PSMB4, PSMB5, PSMD10, PSMD12, PSMD6, RPS27A, UBA52, UBB, UBC]
GO:0043487	regulation of RNA stability	GO_BiologicalProcess-EBI-UniProt-GOA_17.02.2020_00h00	6.24336e-09	4.96347e-06	1.06731e-22	3.0952e-21	[3, 6, 7]	Group34	9.38776	23	[ANP32A, APEX1, ELAVL1, EXOSC7, PABPC1, PSMA1, PSMA6, PSMB1, PSMB2, PSMB3, PSMB4, PSMB5, PSMD10, PSMD12, PSMD6, RPS27A, SET, UBA52, UBB, UBC, UPF1, YWHAB, YWHAZ]
GO:0006521	regulation of cellular amino acid metabolic process	GO_BiologicalProcess-EBI-UniProt-GOA_17.02.2020_00h00	9.41381e-06	0.00665557	1.06731e-22	3.0952e-21	[5, 6]	Group34	12.6582	10	[PSMA1, PSMA6, PSMB1, PSMB2, PSMB3, PSMB4, PSMB5, PSMD10, PSMD12, PSMD6]
GO:0016055	Wnt signaling pathway	GO_BiologicalProcess-EBI-UniProt-GOA_17.02.2020_00h00	3.00726e-06	0.00221635	1.06731e-22	3.0952e-21	[4, 5, 6, 7]	Group34	6.14657	26	[AP2A2, CLTC, CSNK2A1, CSNK2A2, DDB1, GTF2I, LEO1, PSMA1, PSMA6, PSMB1, PSMB2, PSMB3, PSMB4, PSMB5, PSMD10, PSMD12, PSMD6, RPS27A, UBA52, UBB, UBC, VPS26A, VPS29, VPS35, WDR1, WDR61]
GO:0031349	positive regulation of defense response	GO_BiologicalProcess-EBI-UniProt-GOA_17.02.2020_00h00	6.91131e-06	0.00497614	1.06731e-22	3.0952e-21	[5, 6]	Group34	5.26316	32	[CD81, CTSB, CTSC, CTSH, DDT, DDTL, FGG, IGFBP7, IL18, KARS1, PAFAH1B1, PEBP1, PRKDC, PSMA1, PSMA6, PSMB1, PSMB2, PSMB3, PSMB4, PSMB5, PSMD10, PSMD12, PSMD6, RPS27A, RPSA, TALDO1, TGM2, UBA52, UBB, UBC, XRCC5, XRCC6]
GO:0044257	cellular protein catabolic process	GO_BiologicalProcess-EBI-UniProt-GOA_17.02.2020_00h00	1.18918e-05	0.0083005	1.06731e-22	3.0952e-21	[5, 6]	Group34	4.84928	37	[AP2A2, CLTC, CPVL, CTSA, CTSB, CTSC, CTSH, DDB1, DNAJB12, ELOC, EXOSC7, IDE, ISG15, PCYOX1, PPT1, PRPF19, PSMA1, PSMA6, PSMB1, PSMB2, PSMB3, PSMB4, PSMB5, PSMD10, PSMD12, PSMD6, RPS27A, STT3B, TBL1XR1, UBA52, UBB, UBC, UBXN4, UCHL1, UGGT1, VCP, WDR1]
GO:1901532	regulation of hematopoietic progenitor cell differentiation	GO_BiologicalProcess-EBI-UniProt-GOA_17.02.2020_00h00	8.57819e-06	0.0060991	1.06731e-22	3.0952e-21	[5, 6]	Group34	10.5263	12	[NUDT21, PSMA1, PSMA6, PSMB1, PSMB2, PSMB3, PSMB4, PSMB5, PSMD10, PSMD12, PSMD6, TXN]
GO:0002218	activation of innate immune response	GO_BiologicalProcess-EBI-UniProt-GOA_17.02.2020_00h00	5.88602e-06	0.00427325	1.06731e-22	3.0952e-21	[3, 6, 7, 8]	Group34	6.58683	22	[CTSB, CTSH, FGG, IGFBP7, PRKDC, PSMA1, PSMA6, PSMB1, PSMB2, PSMB3, PSMB4, PSMB5, PSMD10, PSMD12, PSMD6, RPS27A, RPSA, UBA52, UBB, UBC, XRCC5, XRCC6]
GO:0002479	antigen processing and presentation of exogenous peptide antigen via MHC class I, TAP-dependent	GO_BiologicalProcess-EBI-UniProt-GOA_17.02.2020_00h00	9.82633e-07	0.000744836	1.06731e-22	3.0952e-21	[6]	Group34	12.9032	12	[CALR, HLA-A, PSMA1, PSMA6, PSMB1, PSMB2, PSMB3, PSMB4, PSMB5, PSMD10, PSMD12, PSMD6]
GO:0010608	posttranscriptional regulation of gene expression	GO_BiologicalProcess-EBI-UniProt-GOA_17.02.2020_00h00	1.44499e-10	1.17189e-07	1.06731e-22	3.0952e-21	[6]	Group34	6.33609	46	[AARS1, ACO1, ADAR, AIFM2, ANP32A, APEX1, CALR, DDX1, EIF2S3, EIF2S3B, EIF3B, EIF4H, EIF5A, EIF5A2, EIF5AL1, ELAVL1, EPRS1, EXOSC7, GLUL, LRPPRC, METAP1, MTPN, NEU1, NUDT21, PABPC1, PSMA1, PSMA6, PSMB1, PSMB2, PSMB3, PSMB4, PSMB5, PSMD10, PSMD12, PSMD6, RACK1, RPS27A, SET, SHMT1, SHMT2, UBA52, UBB, UBC, UPF1, YWHAB, YWHAZ]
GO:0051603	proteolysis involved in cellular protein catabolic process	GO_BiologicalProcess-EBI-UniProt-GOA_17.02.2020_00h00	3.87395e-05	0.0256456	1.06731e-22	3.0952e-21	[5, 6, 7]	Group34	4.7486	34	[CPVL, CTSA, CTSB, CTSC, CTSH, DDB1, DNAJB12, ELOC, EXOSC7, IDE, ISG15, PCYOX1, PRPF19, PSMA1, PSMA6, PSMB1, PSMB2, PSMB3, PSMB4, PSMB5, PSMD10, PSMD12, PSMD6, RPS27A, STT3B, TBL1XR1, UBA52, UBB, UBC, UBXN4, UCHL1, UGGT1, VCP, WDR1]
GO:0070498	interleukin-1-mediated signaling pathway	GO_BiologicalProcess-EBI-UniProt-GOA_17.02.2020_00h00	2.85625e-07	0.000219645	1.06731e-22	3.0952e-21	[5, 6, 7]	Group34	12.069	14	[PSMA1, PSMA6, PSMB1, PSMB2, PSMB3, PSMB4, PSMB5, PSMD10, PSMD12, PSMD6, RPS27A, UBA52, UBB, UBC]
GO:0071347	cellular response to interleukin-1	GO_BiologicalProcess-EBI-UniProt-GOA_17.02.2020_00h00	1.39327e-05	0.00965538	1.06731e-22	3.0952e-21	[6]	Group34	7.45614	17	[FGG, PSMA1, PSMA6, PSMB1, PSMB2, PSMB3, PSMB4, PSMB5, PSMD10, PSMD12, PSMD6, RPS27A, UBA52, UBB, UBC, UPF1, WDR1]
GO:0090175	regulation of establishment of planar polarity	GO_BiologicalProcess-EBI-UniProt-GOA_17.02.2020_00h00	1.44245e-05	0.00996731	1.06731e-22	3.0952e-21	[6]	Group34	9.28571	13	[AP2A2, CLTC, PSMA1, PSMA6, PSMB1, PSMB2, PSMB3, PSMB4, PSMB5, PSMD10, PSMD12, PSMD6, WDR1]
GO:0000165	MAPK cascade	GO_BiologicalProcess-EBI-UniProt-GOA_17.02.2020_00h00	5.30352e-05	0.0344199	1.06731e-22	3.0952e-21	[4, 5, 6, 8, 9]	Group34	5.31697	26	[CTSB, CTSH, GRB2, IL18, KARS1, NEU1, PEBP1, PSMA1, PSMA6, PSMB1, PSMB2, PSMB3, PSMB4, PSMB5, PSMD10, PSMD12, PSMD6, RPS27A, SPTBN1, UBA52, UBB, UBC, WDR1, YWHAB, YWHAE, YWHAZ]
GO:0010498	proteasomal protein catabolic process	GO_BiologicalProcess-EBI-UniProt-GOA_17.02.2020_00h00	2.32081e-05	0.0157119	1.06731e-22	3.0952e-21	[5, 6, 7, 8]	Group34	5.72792	24	[DDB1, DNAJB12, EXOSC7, PRPF19, PSMA1, PSMA6, PSMB1, PSMB2, PSMB3, PSMB4, PSMB5, PSMD10, PSMD12, PSMD6, RPS27A, STT3B, TBL1XR1, UBA52, UBB, UBC, UBXN4, UCHL1, UGGT1, VCP]
GO:0030177	positive regulation of Wnt signaling pathway	GO_BiologicalProcess-EBI-UniProt-GOA_17.02.2020_00h00	3.56091e-05	0.0236089	1.06731e-22	3.0952e-21	[6, 7]	Group34	7.23982	16	[CSNK2A1, CSNK2A2, GTF2I, PSMA1, PSMA6, PSMB1, PSMB2, PSMB3, PSMB4, PSMB5, PSMD10, PSMD12, PSMD6, TBL1XR1, VCP, VPS35]
GO:0043687	post-translational protein modification	GO_BiologicalProcess-EBI-UniProt-GOA_17.02.2020_00h00	1.1658e-06	0.000881342	1.06731e-22	3.0952e-21	[6, 7]	Group34	6.1674	28	[AFP, ANP32A, APOA1, APOE, COPS6, CPOX, DDB1, ELOC, FGG, FN1, IGFBP7, KTN1, NAE1, PSMA1, PSMA6, PSMB1, PSMB2, PSMB3, PSMB4, PSMB5, PSMD10, PSMD12, PSMD6, SERPINA1, STT3B, SUMF2, TPP1, UBE2M]
GO:0070646	protein modification by small protein removal	GO_BiologicalProcess-EBI-UniProt-GOA_17.02.2020_00h00	7.60059e-05	0.0484158	1.06731e-22	3.0952e-21	[5, 6, 7, 8]	Group34	5.72207	21	[ACTL6A, COPS6, HARS1, PSMA1, PSMA6, PSMB1, PSMB2, PSMB3, PSMB4, PSMB5, PSMD10, PSMD12, PSMD6, RPS27A, SHMT1, SHMT2, UBA52, UBB, UBC, UCHL1, VCP]
GO:1902036	regulation of hematopoietic stem cell differentiation	GO_BiologicalProcess-EBI-UniProt-GOA_17.02.2020_00h00	8.11944e-06	0.00578916	1.06731e-22	3.0952e-21	[6, 7]	Group34	11.5789	11	[PSMA1, PSMA6, PSMB1, PSMB2, PSMB3, PSMB4, PSMB5, PSMD10, PSMD12, PSMD6, TXN]
GO:1903311	regulation of mRNA metabolic process	GO_BiologicalProcess-EBI-UniProt-GOA_17.02.2020_00h00	3.936e-09	3.14486e-06	1.06731e-22	3.0952e-21	[6, 7]	Group34	7.28929	32	[ANP32A, APEX1, CPSF6, DAZAP1, ELAVL1, EXOSC7, HARS1, HNRNPA1, LEO1, NUDT21, PABPC1, PRDX5, PRPF19, PSMA1, PSMA6, PSMB1, PSMB2, PSMB3, PSMB4, PSMB5, PSMD10, PSMD12, PSMD6, RPS27A, SET, SRSF2, UBA52, UBB, UBC, UPF1, YWHAB, YWHAZ]
GO:0043488	regulation of mRNA stability	GO_BiologicalProcess-EBI-UniProt-GOA_17.02.2020_00h00	2.79851e-09	2.2416e-06	1.06731e-22	3.0952e-21	[4, 7, 8, 9]	Group34	9.78723	23	[ANP32A, APEX1, ELAVL1, EXOSC7, PABPC1, PSMA1, PSMA6, PSMB1, PSMB2, PSMB3, PSMB4, PSMB5, PSMD10, PSMD12, PSMD6, RPS27A, SET, UBA52, UBB, UBC, UPF1, YWHAB, YWHAZ]
GO:0061013	regulation of mRNA catabolic process	GO_BiologicalProcess-EBI-UniProt-GOA_17.02.2020_00h00	3.62993e-08	2.85676e-05	1.06731e-22	3.0952e-21	[6, 7, 8]	Group34	8.55019	23	[ANP32A, APEX1, ELAVL1, EXOSC7, PABPC1, PSMA1, PSMA6, PSMB1, PSMB2, PSMB3, PSMB4, PSMB5, PSMD10, PSMD12, PSMD6, RPS27A, SET, UBA52, UBB, UBC, UPF1, YWHAB, YWHAZ]
GO:1902749	regulation of cell cycle G2/M phase transition	GO_BiologicalProcess-EBI-UniProt-GOA_17.02.2020_00h00	9.25813e-06	0.00655476	1.06731e-22	3.0952e-21	[7]	Group34	6.82594	20	[ACTR1A, CENPF, DYNC1H1, DYNLL1, LAP3, MRE11, NAE1, PAFAH1B1, PSMA1, PSMA6, PSMB1, PSMB2, PSMB3, PSMB4, PSMB5, PSMD10, PSMD12, PSMD6, TUBB3, YWHAE]
GO:0043620	regulation of DNA-templated transcription in response to stress	GO_BiologicalProcess-EBI-UniProt-GOA_17.02.2020_00h00	7.76323e-07	0.000590782	1.06731e-22	3.0952e-21	[4, 7, 8, 9, 10]	Group34	9.7561	16	[ELOC, HMOX1, PSMA1, PSMA6, PSMB1, PSMB2, PSMB3, PSMB4, PSMB5, PSMD10, PSMD12, PSMD6, RPS27A, UBA52, UBB, UBC]
GO:0010389	regulation of G2/M transition of mitotic cell cycle	GO_BiologicalProcess-EBI-UniProt-GOA_17.02.2020_00h00	3.03595e-06	0.00223446	1.06731e-22	3.0952e-21	[7, 8]	Group34	7.35294	20	[ACTR1A, CENPF, DYNC1H1, DYNLL1, LAP3, MRE11, NAE1, PAFAH1B1, PSMA1, PSMA6, PSMB1, PSMB2, PSMB3, PSMB4, PSMB5, PSMD10, PSMD12, PSMD6, TUBB3, YWHAE]
GO:0010499	proteasomal ubiquitin-independent protein catabolic process	GO_BiologicalProcess-EBI-UniProt-GOA_17.02.2020_00h00	1.50698e-06	0.00113777	1.06731e-22	3.0952e-21	[6, 7, 8, 9]	Group34	25.9259	7	[PSMA1, PSMA6, PSMB1, PSMB2, PSMB3, PSMB4, PSMB5]
GO:0060071	Wnt signaling pathway, planar cell polarity pathway	GO_BiologicalProcess-EBI-UniProt-GOA_17.02.2020_00h00	3.16203e-06	0.00231777	1.06731e-22	3.0952e-21	[6, 7, 8, 9]	Group34	10.6557	13	[AP2A2, CLTC, PSMA1, PSMA6, PSMB1, PSMB2, PSMB3, PSMB4, PSMB5, PSMD10, PSMD12, PSMD6, WDR1]
GO:0070003	threonine-type peptidase activity	GO_BiologicalProcess-EBI-UniProt-GOA_17.02.2020_00h00	8.47584e-07	0.000643316	1.06731e-22	3.0952e-21	[7, 8]	Group34	28	7	[PSMA1, PSMA6, PSMB1, PSMB2, PSMB3, PSMB4, PSMB5]
GO:0043161	proteasome-mediated ubiquitin-dependent protein catabolic process	GO_BiologicalProcess-EBI-UniProt-GOA_17.02.2020_00h00	4.4967e-05	0.0294983	1.06731e-22	3.0952e-21	[6, 7, 8, 9, 10]	Group34	5.77428	22	[DDB1, DNAJB12, EXOSC7, PSMA1, PSMA6, PSMB1, PSMB2, PSMB3, PSMB4, PSMB5, PSMD10, PSMD12, PSMD6, RPS27A, STT3B, TBL1XR1, UBA52, UBB, UBC, UBXN4, UCHL1, VCP]
GO:0061418	regulation of transcription from RNA polymerase II promoter in response to hypoxia	GO_BiologicalProcess-EBI-UniProt-GOA_17.02.2020_00h00	9.31228e-09	7.38463e-06	1.06731e-22	3.0952e-21	[5, 6, 7, 9, 10, 11, 12]	Group34	14.4231	15	[ELOC, PSMA1, PSMA6, PSMB1, PSMB2, PSMB3, PSMB4, PSMB5, PSMD10, PSMD12, PSMD6, RPS27A, UBA52, UBB, UBC]
GO:0004298	threonine-type endopeptidase activity	GO_BiologicalProcess-EBI-UniProt-GOA_17.02.2020_00h00	8.47584e-07	0.000643316	1.06731e-22	3.0952e-21	[8, 9]	Group34	28	7	[PSMA1, PSMA6, PSMB1, PSMB2, PSMB3, PSMB4, PSMB5]
GO:0010972	negative regulation of G2/M transition of mitotic cell cycle	GO_BiologicalProcess-EBI-UniProt-GOA_17.02.2020_00h00	2.57962e-05	0.0173609	1.06731e-22	3.0952e-21	[8, 9]	Group34	9.44882	12	[MRE11, NAE1, PSMA1, PSMA6, PSMB1, PSMB2, PSMB3, PSMB4, PSMB5, PSMD10, PSMD12, PSMD6]
GO:0043618	regulation of transcription from RNA polymerase II promoter in response to stress	GO_BiologicalProcess-EBI-UniProt-GOA_17.02.2020_00h00	3.60477e-07	0.000276847	1.06731e-22	3.0952e-21	[5, 8, 9, 10, 11]	Group34	10.3226	16	[ELOC, HMOX1, PSMA1, PSMA6, PSMB1, PSMB2, PSMB3, PSMB4, PSMB5, PSMD10, PSMD12, PSMD6, RPS27A, UBA52, UBB, UBC]
GO:0031145	anaphase-promoting complex-dependent catabolic process	GO_BiologicalProcess-EBI-UniProt-GOA_17.02.2020_00h00	1.38551e-08	1.09455e-05	1.06731e-22	3.0952e-21	[7, 8, 9, 10, 11]	Group34	14.0187	15	[EXOSC7, PSMA1, PSMA6, PSMB1, PSMB2, PSMB3, PSMB4, PSMB5, PSMD10, PSMD12, PSMD6, RPS27A, UBA52, UBB, UBC]
