# Supplementary material for: Ellagic Acid Triggers the Necrosis of Differentiated Human Enterocytes Exposed to 3-Nitro-Tyrosine: An MS-Based Proteomic Study
Source: Antioxidants (Basel). 2022 Dec 17;11(12):2485. doi: 10.3390/antiox11122485 (PMC9774974; doi:10.3390/antiox11122485)
Supplement: Supplementary file 1 [file antioxidants-11-02485-s001.zip › Table S10.xls]

## Sheet: ClueGO Results
ID	Term	Ontology Source	Term PValue	Term PValue Corrected with Bonferroni step down	Group PValue	Group PValue Corrected with Bonferroni step down	GOLevels	GOGroups	% Associated Genes	Nr. Genes	Associated Genes Found
GO:0003723	RNA binding	GO_MolecularFunction-EBI-UniProt-GOA_17.02.2020_00h00	5.57837e-18	1.14357e-15	5.57837e-18	1.11567e-16	[4]	Group00	5.28134	107	[AARS1, ACAA2, ACO1, ADAR, ADK, ANP32A, APEH, APEX1, ARCN1, BZW1, CALR, CARS1, CLTC, CLUH, CNP, COPA, CPSF1, CPSF3, CPSF6, CRYZ, CSTB, DAZAP1, DDX1, DTD1, DYNC1H1, EDF1, EIF2S3, EIF2S3B, EIF3B, EIF4H, EIF5A, EIF5A2, EIF5AL1, ELAVL1, EMG1, EPRS1, ERH, EXOSC7, FASN, FKBP4, FLNA, FSCN1, GDI2, GLUL, GRB2, H4C1, HARS1, HNRNPA1, HNRNPA1L2, HNRNPDL, HNRNPF, HNRNPH1, HSD17B10, IGFBP7, KARS1, KTN1, LACTB2…
GO:0019904	protein domain specific binding	GO_MolecularFunction-EBI-UniProt-GOA_17.02.2020_00h00	0.00016282	0.0255628	0.00016282	0.000325641	[3]	Group01	4.17973	40	[AP2A2, APEX1, BANF1, CAD, CLTC, CPOX, DDB1, DNAJA1, DNPEP, DPYSL3, DYNLL1, EXOSC7, FN1, GRB2, H4C1, HARS1, HDAC1, HNRNPA1, IQGAP1, LAP3, M6PR, MYH9, NUMA1, PDLIM1, PDZK1, PEBP1, PPIL1, PRKDC, PTPN11, RACK1, SH3BGRL, ST13, TGM2, TLN1, VCP, WDR1, YWHAB, YWHAE, YWHAQ, YWHAZ]
GO:0031072	heat shock protein binding	GO_MolecularFunction-EBI-UniProt-GOA_17.02.2020_00h00	0.000137396	0.0218459	0.000137396	0.000549583	[3]	Group02	8	12	[APOA1, CSNK2A1, CSNK2A2, DNAJA1, DNAJB12, FKBP4, PRDX5, PTGES3, ST13, ST13P4, ST13P5, TOMM34]
GO:0042162	telomeric DNA binding	GO_MolecularFunction-EBI-UniProt-GOA_17.02.2020_00h00	0.00029142	0.0448787	0.00029142	0.00029142	[6]	Group03	12.069	7	[APEX1, HNRNPA1, RPA1, TPP1, UPF1, XRCC5, XRCC6]
GO:0051015	actin filament binding	GO_MolecularFunction-EBI-UniProt-GOA_17.02.2020_00h00	2.48917e-06	0.000448051	2.48917e-06	1.99134e-05	[3, 5]	Group04	7.78689	19	[ACTR3, ANXA6, ANXA8, ANXA8L1, ARPC4, ARPC4-TTLL3, ARPC5, CORO1B, COTL1, DSTN, FLNA, FSCN1, MYH10, MYH14, MYH9, TLN1, WDR1, YWHAB, YWHAQ]
GO:0051538	3 iron, 4 sulfur cluster binding	GO_MolecularFunction-EBI-UniProt-GOA_17.02.2020_00h00	8.04332e-06	0.00139954	8.04332e-06	5.63032e-05	[4]	Group05	57.1429	4	[ACO1, ACO2, SDHB, SORD]
GO:0009055	electron transfer activity	GO_MolecularFunction-EBI-UniProt-GOA_17.02.2020_00h00	4.80688e-15	9.70991e-13	4.80688e-15	8.1717e-14	[3]	Group06	17.3913	24	[ADH5, AIFM2, AKR1A1, AKR7A2, ALDH2, ALDH4A1, ALDH9A1, ARSA, COX7A2, CYB5A, GLDC, GLRX5, GSR, HAAO, MAT2B, ME1, ME2, NDUFA4, QDPR, SDHB, SORD, TSTA3, TXNRD2, UQCRB]
GO:0016290	palmitoyl-CoA hydrolase activity	GO_MolecularFunction-EBI-UniProt-GOA_17.02.2020_00h00	0.000147731	0.0233416	0.000147731	0.000443194	[7]	Group07	30.7692	4	[ACAA2, ACOT1, ACOT2, PPT1]
GO:0050839	cell adhesion molecule binding	GO_MolecularFunction-EBI-UniProt-GOA_17.02.2020_00h00	1.09948e-06	0.000203403	1.09948e-06	1.09948e-05	[3]	Group08	5.42169	36	[ATIC, BZW1, CAD, CALR, CD81, CORO1B, CPOX, EIF2S3, EIF4H, EPS8L2, FASN, FGG, FLNA, FN1, FSCN1, IQGAP1, ISG15, KTN1, MRE11, MYH9, PDLIM1, PPME1, PRDX5, PROM1, PTPN11, RACK1, RNH1, S100P, SPTBN1, TAGLN2, TLN1, TPP1, WDR1, YWHAB, YWHAE, YWHAZ]
GO:0045296	cadherin binding	GO_MolecularFunction-EBI-UniProt-GOA_17.02.2020_00h00	4.52055e-08	8.76986e-06	1.09948e-06	1.09948e-05	[4]	Group08	6.91244	30	[ATIC, BZW1, CAD, CORO1B, EIF2S3, EIF4H, EPS8L2, FASN, FLNA, FN1, FSCN1, IQGAP1, KTN1, MRE11, MYH9, PDLIM1, PPME1, PRDX5, PROM1, PTPN11, RACK1, RNH1, S100P, SPTBN1, TAGLN2, TLN1, WDR1, YWHAB, YWHAE, YWHAZ]
GO:0070003	threonine-type peptidase activity	GO_MolecularFunction-EBI-UniProt-GOA_17.02.2020_00h00	8.76596e-07	0.000163923	8.76596e-07	9.64255e-06	[5]	Group09	28	7	[PSMA1, PSMA6, PSMB1, PSMB2, PSMB3, PSMB4, PSMB5]
GO:0004298	threonine-type endopeptidase activity	GO_MolecularFunction-EBI-UniProt-GOA_17.02.2020_00h00	8.76596e-07	0.000163923	8.76596e-07	9.64255e-06	[6]	Group09	28	7	[PSMA1, PSMA6, PSMB1, PSMB2, PSMB3, PSMB4, PSMB5]
GO:0016875	ligase activity, forming carbon-oxygen bonds	GO_MolecularFunction-EBI-UniProt-GOA_17.02.2020_00h00	1.63864e-06	0.000298233	1.63864e-06	1.47478e-05	[3]	Group10	17.6471	9	[AARS1, CARS1, DTD1, EPRS1, GLUL, HARS1, KARS1, LARS1, TARS1]
GO:0004812	aminoacyl-tRNA ligase activity	GO_MolecularFunction-EBI-UniProt-GOA_17.02.2020_00h00	1.63864e-06	0.000298233	1.63864e-06	1.47478e-05	[4]	Group10	17.6471	9	[AARS1, CARS1, DTD1, EPRS1, GLUL, HARS1, KARS1, LARS1, TARS1]
GO:0043177	organic acid binding	GO_MolecularFunction-EBI-UniProt-GOA_17.02.2020_00h00	5.30793e-05	0.00875808	5.30793e-05	0.000318476	[3]	Group11	6.27063	19	[AARS1, ACTR1A, ADH5, AFP, AKR1C1, AKR1C3, CAD, FABP3, GCLC, GLDC, GLUL, GRHPR, GSS, KARS1, NME2, PRMT1, SHMT1, SHMT2, UGGT1]
GO:0031406	carboxylic acid binding	GO_MolecularFunction-EBI-UniProt-GOA_17.02.2020_00h00	2.41571e-05	0.00413086	5.30793e-05	0.000318476	[4]	Group11	6.64336	19	[AARS1, ACTR1A, ADH5, AFP, AKR1C1, AKR1C3, CAD, FABP3, GCLC, GLDC, GLUL, GRHPR, GSS, KARS1, NME2, PRMT1, SHMT1, SHMT2, UGGT1]
GO:0016597	amino acid binding	GO_MolecularFunction-EBI-UniProt-GOA_17.02.2020_00h00	3.39589e-05	0.00577301	5.30793e-05	0.000318476	[5]	Group11	12.3288	9	[AARS1, CAD, GCLC, GLDC, GLUL, GSS, KARS1, SHMT1, SHMT2]
GO:0042802	identical protein binding	GO_MolecularFunction-EBI-UniProt-GOA_17.02.2020_00h00	1.03397e-16	2.09897e-14	4.12675e-18	8.66617e-17	[3]	Group12	4.85642	115	[ABAT, ACADM, ACTR1A, ADH5, ALAD, ALDH3A2, ALDH4A1, ALDH9A1, ANXA4, ANXA6, APEH, APEX1, APOA1, APOE, ATIC, BANF1, CAD, CARS1, CAT, CENPF, CISD1, CORO1B, COTL1, CPOX, CPQ, CSNK2A1, CSNK2A2, CTSC, DECR1, DNPEP, DPYSL3, DTD1, DYNLL2, DYNLT1, EEA1, ELAVL1, EPRS1, ERP29, FASN, FBP1, FGG, FLNA, FN1, G6PD, GALE, GCLC, GGCT, GLB1, GLDC, GLUL, GRB2, GRHPR, GSS, GSTM3, HARS1, HEXB, HGD, HMOX1, IDE, IGFBP7,…
GO:0046983	protein dimerization activity	GO_MolecularFunction-EBI-UniProt-GOA_17.02.2020_00h00	1.03744e-10	2.07489e-08	4.12675e-18	8.66617e-17	[3]	Group12	5.05124	69	[ACTR1A, ADH5, ALDH3A2, APEX1, APOE, ATIC, BANF1, CAT, CENPF, CPOX, CPQ, EEA1, ELAVL1, EPRS1, ERP29, FLNA, G6PD, GALE, GCLC, GGCT, GLB1, GLDC, GLUL, GRHPR, GSS, GSTM3, H2AC4, H2AC6, H2AW, H2AZ1, H2AZ2, H2BC17, H2BC21, H2BC3, H2BU1, H3-2, H4C1, HARS1, HEXA, HMOX1, IDE, IGFBP7, KARS1, MYH9, NAE1, NAGA, NEU1, NUDT21, NUDT5, PDXK, PNPO, PRDX5, PRMT5, RACK1, S100A10, S100A13, S100P, SDHB, SHMT1, SORD,…
GO:0042803	protein homodimerization activity	GO_MolecularFunction-EBI-UniProt-GOA_17.02.2020_00h00	5.03454e-09	9.8677e-07	4.12675e-18	8.66617e-17	[4]	Group12	5.45256	50	[ACTR1A, ADH5, ALDH3A2, APEX1, APOE, ATIC, BANF1, CAT, CENPF, CPOX, CPQ, EEA1, ELAVL1, EPRS1, ERP29, FLNA, G6PD, GALE, GCLC, GGCT, GLB1, GLDC, GLUL, GRHPR, GSS, GSTM3, HARS1, HMOX1, IDE, IGFBP7, KARS1, MYH9, NAGA, NUDT21, NUDT5, PDXK, PNPO, PRDX5, RACK1, S100A10, S100A13, S100P, SDHB, SHMT1, SORD, TP53I3, TXN, UGGT1, UPB1, WDR1]
GO:0050661	NADP binding	GO_MolecularFunction-EBI-UniProt-GOA_17.02.2020_00h00	1.0421e-06	0.000193831	1.68496e-07	2.35895e-06	[4, 5]	Group13	14.2857	11	[CAT, CRYZ, DECR1, FASN, G6PD, GRHPR, GSR, ME1, PGD, QDPR, TP53I3]
GO:0003960	NADPH:quinone reductase activity	GO_MolecularFunction-EBI-UniProt-GOA_17.02.2020_00h00	0.000208578	0.0325382	1.68496e-07	2.35895e-06	[5]	Group13	50	3	[ADH4, CRYZ, TP53I3]
GO:0070402	NADPH binding	GO_MolecularFunction-EBI-UniProt-GOA_17.02.2020_00h00	1.18156e-06	0.000216226	1.68496e-07	2.35895e-06	[4, 5, 6]	Group13	35.2941	6	[CRYZ, DECR1, FASN, GRHPR, QDPR, TP53I3]
GO:0016627	oxidoreductase activity, acting on the CH-CH group of donors	GO_MolecularFunction-EBI-UniProt-GOA_17.02.2020_00h00	3.41299e-09	6.72359e-07	3.49385e-09	5.24077e-08	[3]	Group14	18.8406	13	[ACADM, ACADVL, AKR1C1, AKR1C3, BDH2, BLVRB, CPOX, DECR1, DHCR24, FASN, IVD, SDHB, SORD]
GO:0016628	oxidoreductase activity, acting on the CH-CH group of donors, NAD or NADP as acceptor	GO_MolecularFunction-EBI-UniProt-GOA_17.02.2020_00h00	2.63541e-06	0.000471739	3.49385e-09	5.24077e-08	[4]	Group14	24.1379	7	[AKR1C1, AKR1C3, BDH2, BLVRB, DECR1, DHCR24, FASN]
GO:0050660	flavin adenine dinucleotide binding	GO_MolecularFunction-EBI-UniProt-GOA_17.02.2020_00h00	1.53764e-05	0.00266012	3.49385e-09	5.24077e-08	[4, 5]	Group14	10.8911	11	[ACADM, ACADVL, AIFM2, AKR1A1, DHCR24, GSR, IVD, MAT2B, SDHB, SORD, TXNRD2]
GO:0016801	hydrolase activity, acting on ether bonds	GO_MolecularFunction-EBI-UniProt-GOA_17.02.2020_00h00	0.000104102	0.0166563	0.000104102	0.000520509	[3]	Group15	33.3333	4	[AKR7A2, EPHX1, LTA4H, RNPEP]
GO:0016803	ether hydrolase activity	GO_MolecularFunction-EBI-UniProt-GOA_17.02.2020_00h00	4.57574e-05	0.00764148	0.000104102	0.000520509	[4]	Group15	40	4	[AKR7A2, EPHX1, LTA4H, RNPEP]
GO:0004301	epoxide hydrolase activity	GO_MolecularFunction-EBI-UniProt-GOA_17.02.2020_00h00	3.50896e-06	0.000624595	0.000104102	0.000520509	[5]	Group15	66.6667	4	[AKR7A2, EPHX1, LTA4H, RNPEP]
GO:0008238	exopeptidase activity	GO_MolecularFunction-EBI-UniProt-GOA_17.02.2020_00h00	2.63972e-14	5.30584e-12	2.63972e-14	4.22355e-13	[5]	Group16	15.3374	25	[APEH, CNDP2, CPD, CPOX, CPQ, CPVL, CTSA, CTSB, CTSH, DNPEP, DPP3, DPP7, GGH, LAP3, LTA4H, METAP1, NAALAD2, NPEPPS, PRCP, RNPEP, SCRN1, SCRN2, TPP1, TPP2, UCHL1]
GO:0004180	carboxypeptidase activity	GO_MolecularFunction-EBI-UniProt-GOA_17.02.2020_00h00	9.39307e-05	0.0151228	2.63972e-14	4.22355e-13	[6]	Group16	12.3077	8	[CNDP2, CPD, CPOX, CPQ, CPVL, CTSA, NAALAD2, PRCP]
GO:0016805	dipeptidase activity	GO_MolecularFunction-EBI-UniProt-GOA_17.02.2020_00h00	8.09982e-05	0.0132027	2.63972e-14	4.22355e-13	[6]	Group16	23.8095	5	[CNDP2, CPQ, NAALAD2, SCRN1, SCRN2]
GO:0004185	serine-type carboxypeptidase activity	GO_MolecularFunction-EBI-UniProt-GOA_17.02.2020_00h00	4.57574e-05	0.00764148	2.63972e-14	4.22355e-13	[7]	Group16	40	4	[CPD, CPVL, CTSA, PRCP]
GO:0016651	oxidoreductase activity, acting on NAD(P)H	GO_MolecularFunction-EBI-UniProt-GOA_17.02.2020_00h00	4.61686e-05	0.00766399	2.09196e-07	2.51036e-06	[3]	Group17	8.95522	12	[ADH4, AIFM2, AKR1C1, AKR1C3, CRYZ, GSR, MAT2B, NDUFA4, TP53I3, TXN, TXNDC17, TXNRD2]
GO:0016667	oxidoreductase activity, acting on a sulfur group of donors	GO_MolecularFunction-EBI-UniProt-GOA_17.02.2020_00h00	6.01062e-07	0.000113601	2.09196e-07	2.51036e-06	[3]	Group17	15.0685	11	[AKR1A1, GLRX5, GSR, MAT2B, PCYOX1, PDIA4, SELENBP1, TXN, TXNDC17, TXNL1, TXNRD2]
GO:0015036	disulfide oxidoreductase activity	GO_MolecularFunction-EBI-UniProt-GOA_17.02.2020_00h00	1.15096e-06	0.000211776	2.09196e-07	2.51036e-06	[4]	Group17	18.3673	9	[AKR1A1, GLRX5, GSR, MAT2B, PDIA4, TXN, TXNDC17, TXNL1, TXNRD2]
GO:0016668	oxidoreductase activity, acting on a sulfur group of donors, NAD(P) as acceptor	GO_MolecularFunction-EBI-UniProt-GOA_17.02.2020_00h00	6.28566e-05	0.0103085	2.09196e-07	2.51036e-06	[4]	Group17	25	5	[GSR, MAT2B, TXN, TXNDC17, TXNRD2]
GO:0016614	oxidoreductase activity, acting on CH-OH group of donors	GO_MolecularFunction-EBI-UniProt-GOA_17.02.2020_00h00	2.4712e-09	4.89298e-07	1.5117e-16	2.72105e-15	[3]	Group18	12.0253	19	[ADH4, ADH5, AKR1A1, AKR1C1, AKR1C3, AKR7A2, ALDH3A2, BDH2, FASN, G6PD, GRHPR, HSD17B10, IDH2, MDH1, ME1, ME2, PGD, SORD, TSTA3]
GO:0019842	vitamin binding	GO_MolecularFunction-EBI-UniProt-GOA_17.02.2020_00h00	6.13689e-06	0.00107396	1.5117e-16	2.72105e-15	[3]	Group18	8.37696	16	[ABAT, ADH4, FASN, GLDC, NLN, OAT, PDXK, PNPO, PRMT1, PYGB, RBP4, SDHB, SHMT1, SHMT2, SORD, TPP1]
GO:0050662	coenzyme binding	GO_MolecularFunction-EBI-UniProt-GOA_17.02.2020_00h00	7.22216e-17	1.47332e-14	1.5117e-16	2.72105e-15	[3]	Group18	10.9589	40	[ABAT, ACADM, ACADVL, ADH4, AIFM2, AKR1A1, ALDH2, BDH2, CAT, CRYZ, DECR1, DHCR24, FASN, G6PD, GALE, GCLC, GLDC, GRHPR, GSR, HSD17B10, IDH2, IVD, MAT2B, MDH1, ME1, ME2, OAT, PDXK, PGD, PNPO, PRMT1, PYGB, QDPR, SDHB, SHMT1, SHMT2, SORD, TP53I3, TSTA3, TXNRD2]
GO:0070279	vitamin B6 binding	GO_MolecularFunction-EBI-UniProt-GOA_17.02.2020_00h00	4.20325e-06	0.000739772	1.5117e-16	2.72105e-15	[3, 4]	Group18	13.8889	10	[ABAT, GLDC, OAT, PDXK, PNPO, PYGB, SDHB, SHMT1, SHMT2, SORD]
GO:0016616	oxidoreductase activity, acting on the CH-OH group of donors, NAD or NADP as acceptor	GO_MolecularFunction-EBI-UniProt-GOA_17.02.2020_00h00	6.75265e-09	1.31677e-06	1.5117e-16	2.72105e-15	[4]	Group18	12	18	[ADH4, ADH5, AKR1A1, AKR1C1, AKR1C3, AKR7A2, BDH2, FASN, G6PD, GRHPR, HSD17B10, IDH2, MDH1, ME1, ME2, PGD, SORD, TSTA3]
GO:0030170	pyridoxal phosphate binding	GO_MolecularFunction-EBI-UniProt-GOA_17.02.2020_00h00	3.69179e-06	0.000653447	1.5117e-16	2.72105e-15	[4, 5]	Group18	14.0845	10	[ABAT, GLDC, OAT, PDXK, PNPO, PYGB, SDHB, SHMT1, SHMT2, SORD]
GO:0008233	peptidase activity	GO_MolecularFunction-EBI-UniProt-GOA_17.02.2020_00h00	1.87283e-07	3.59583e-05	1.87283e-07	2.43468e-06	[3]	Group19	5.30973	42	[APEH, CAPN1, CNDP2, CPD, CPOX, CPQ, CPVL, CTSA, CTSB, CTSC, CTSD, CTSH, DNPEP, DPP3, DPP7, ERMP1, GGH, IDE, IGFBP7, LAP3, LTA4H, METAP1, NAALAD2, NLN, NPEPPS, PITRM1, PRCP, PSMA1, PSMA6, PSMB1, PSMB2, PSMB3, PSMB4, PSMB5, RNPEP, SCRN1, SCRN2, SHMT1, SUB1, TPP1, TPP2, UCHL1]
GO:0070011	peptidase activity, acting on L-amino acid peptides	GO_MolecularFunction-EBI-UniProt-GOA_17.02.2020_00h00	9.07012e-08	1.75053e-05	1.87283e-07	2.43468e-06	[4]	Group19	5.49738	42	[APEH, CAPN1, CNDP2, CPD, CPOX, CPQ, CPVL, CTSA, CTSB, CTSC, CTSD, CTSH, DNPEP, DPP3, DPP7, ERMP1, GGH, IDE, IGFBP7, LAP3, LTA4H, METAP1, NAALAD2, NLN, NPEPPS, PITRM1, PRCP, PSMA1, PSMA6, PSMB1, PSMB2, PSMB3, PSMB4, PSMB5, RNPEP, SCRN1, SCRN2, SHMT1, SUB1, TPP1, TPP2, UCHL1]
GO:0008237	metallopeptidase activity	GO_MolecularFunction-EBI-UniProt-GOA_17.02.2020_00h00	4.44832e-05	0.00747318	1.87283e-07	2.43468e-06	[5]	Group19	7.14286	16	[CNDP2, CPD, CPOX, CPQ, DNPEP, DPP3, ERMP1, IDE, LAP3, LTA4H, METAP1, NAALAD2, NLN, NPEPPS, PITRM1, RNPEP]
GO:0008238	exopeptidase activity	GO_MolecularFunction-EBI-UniProt-GOA_17.02.2020_00h00	2.63972e-14	5.30584e-12	1.87283e-07	2.43468e-06	[5]	Group19	15.3374	25	[APEH, CNDP2, CPD, CPOX, CPQ, CPVL, CTSA, CTSB, CTSH, DNPEP, DPP3, DPP7, GGH, LAP3, LTA4H, METAP1, NAALAD2, NPEPPS, PRCP, RNPEP, SCRN1, SCRN2, TPP1, TPP2, UCHL1]
GO:0004177	aminopeptidase activity	GO_MolecularFunction-EBI-UniProt-GOA_17.02.2020_00h00	1.28307e-09	2.55332e-07	1.87283e-07	2.43468e-06	[6]	Group19	20.3125	13	[CTSB, CTSH, DNPEP, DPP3, DPP7, LAP3, LTA4H, METAP1, NAALAD2, NPEPPS, PRCP, RNPEP, TPP2]
GO:0004180	carboxypeptidase activity	GO_MolecularFunction-EBI-UniProt-GOA_17.02.2020_00h00	9.39307e-05	0.0151228	1.87283e-07	2.43468e-06	[6]	Group19	12.3077	8	[CNDP2, CPD, CPOX, CPQ, CPVL, CTSA, NAALAD2, PRCP]
GO:0008235	metalloexopeptidase activity	GO_MolecularFunction-EBI-UniProt-GOA_17.02.2020_00h00	8.59615e-05	0.0139258	1.87283e-07	2.43468e-06	[6]	Group19	10.9756	9	[CPD, CPOX, CPQ, DNPEP, LAP3, LTA4H, METAP1, NPEPPS, RNPEP]
GO:0016614	oxidoreductase activity, acting on CH-OH group of donors	GO_MolecularFunction-EBI-UniProt-GOA_17.02.2020_00h00	2.4712e-09	4.89298e-07	1.31063e-17	2.49019e-16	[3]	Group20	12.0253	19	[ADH4, ADH5, AKR1A1, AKR1C1, AKR1C3, AKR7A2, ALDH3A2, BDH2, FASN, G6PD, GRHPR, HSD17B10, IDH2, MDH1, ME1, ME2, PGD, SORD, TSTA3]
GO:0016903	oxidoreductase activity, acting on the aldehyde or oxo group of donors	GO_MolecularFunction-EBI-UniProt-GOA_17.02.2020_00h00	1.63864e-06	0.000298233	1.31063e-17	2.49019e-16	[3]	Group20	17.6471	9	[ADH4, ADH5, AKR1A1, AKR1C1, AKR1C3, ALDH2, ALDH3A2, ALDH4A1, ALDH9A1]
GO:0050662	coenzyme binding	GO_MolecularFunction-EBI-UniProt-GOA_17.02.2020_00h00	7.22216e-17	1.47332e-14	1.31063e-17	2.49019e-16	[3]	Group20	10.9589	40	[ABAT, ACADM, ACADVL, ADH4, AIFM2, AKR1A1, ALDH2, BDH2, CAT, CRYZ, DECR1, DHCR24, FASN, G6PD, GALE, GCLC, GLDC, GRHPR, GSR, HSD17B10, IDH2, IVD, MAT2B, MDH1, ME1, ME2, OAT, PDXK, PGD, PNPO, PRMT1, PYGB, QDPR, SDHB, SHMT1, SHMT2, SORD, TP53I3, TSTA3, TXNRD2]
GO:0016616	oxidoreductase activity, acting on the CH-OH group of donors, NAD or NADP as acceptor	GO_MolecularFunction-EBI-UniProt-GOA_17.02.2020_00h00	6.75265e-09	1.31677e-06	1.31063e-17	2.49019e-16	[4]	Group20	12	18	[ADH4, ADH5, AKR1A1, AKR1C1, AKR1C3, AKR7A2, BDH2, FASN, G6PD, GRHPR, HSD17B10, IDH2, MDH1, ME1, ME2, PGD, SORD, TSTA3]
GO:0016620	oxidoreductase activity, acting on the aldehyde or oxo group of donors, NAD or NADP as acceptor	GO_MolecularFunction-EBI-UniProt-GOA_17.02.2020_00h00	5.37101e-07	0.000102049	1.31063e-17	2.49019e-16	[4]	Group20	20	9	[ADH4, ADH5, AKR1A1, AKR1C1, AKR1C3, ALDH2, ALDH3A2, ALDH4A1, ALDH9A1]
GO:0051287	NAD binding	GO_MolecularFunction-EBI-UniProt-GOA_17.02.2020_00h00	3.88025e-07	7.41129e-05	1.31063e-17	2.49019e-16	[4, 5]	Group20	15.7143	11	[ADH4, ALDH2, BDH2, GRHPR, HSD17B10, IDH2, MDH1, ME1, ME2, QDPR, SORD]
GO:0004030	aldehyde dehydrogenase [NAD(P)+] activity	GO_MolecularFunction-EBI-UniProt-GOA_17.02.2020_00h00	1.73914e-06	0.000314784	1.31063e-17	2.49019e-16	[5]	Group20	33.3333	6	[ADH4, ADH5, ALDH2, ALDH3A2, ALDH4A1, ALDH9A1]
GO:0043878	glyceraldehyde-3-phosphate dehydrogenase (NAD+) (non-phosphorylating) activity	GO_MolecularFunction-EBI-UniProt-GOA_17.02.2020_00h00	6.25564e-07	0.000117606	1.31063e-17	2.49019e-16	[5]	Group20	55.5556	5	[ADH5, ALDH2, ALDH3A2, ALDH4A1, ALDH9A1]
GO:0035410	dihydrotestosterone 17-beta-dehydrogenase activity	GO_MolecularFunction-EBI-UniProt-GOA_17.02.2020_00h00	4.31318e-05	0.00728927	1.31063e-17	2.49019e-16	[5, 6]	Group20	75	3	[AKR1C1, AKR1C3, HSD17B10]
GO:0004029	aldehyde dehydrogenase (NAD+) activity	GO_MolecularFunction-EBI-UniProt-GOA_17.02.2020_00h00	1.90603e-05	0.00327838	1.31063e-17	2.49019e-16	[6]	Group20	31.25	5	[ADH5, ALDH2, ALDH3A2, ALDH4A1, ALDH9A1]
GO:0008106	alcohol dehydrogenase (NADP+) activity	GO_MolecularFunction-EBI-UniProt-GOA_17.02.2020_00h00	0.0002389	0.0370295	1.31063e-17	2.49019e-16	[6]	Group20	19.2308	5	[ADH4, AKR1A1, AKR1C1, AKR1C3, AKR7A2]
GO:0004032	alditol:NADP+ 1-oxidoreductase activity	GO_MolecularFunction-EBI-UniProt-GOA_17.02.2020_00h00	1.90603e-05	0.00327838	1.31063e-17	2.49019e-16	[7]	Group20	31.25	5	[ADH4, AKR1A1, AKR1C1, AKR1C3, AKR7A2]
